# Supplementary material for: Adjunctive Probiotics Alleviates Asthmatic Symptoms via Modulating the Gut Microbiome and Serum Metabolome
Source: PubMed Central journal article supplement (PMC8510161; doi:10.1128/spectrum.00859-21), 2021-10-06
Supplement: spectrum00859-21_supp_1_seq9.pdf [file spectrum00859-21_supp_1_seq9.pdf]

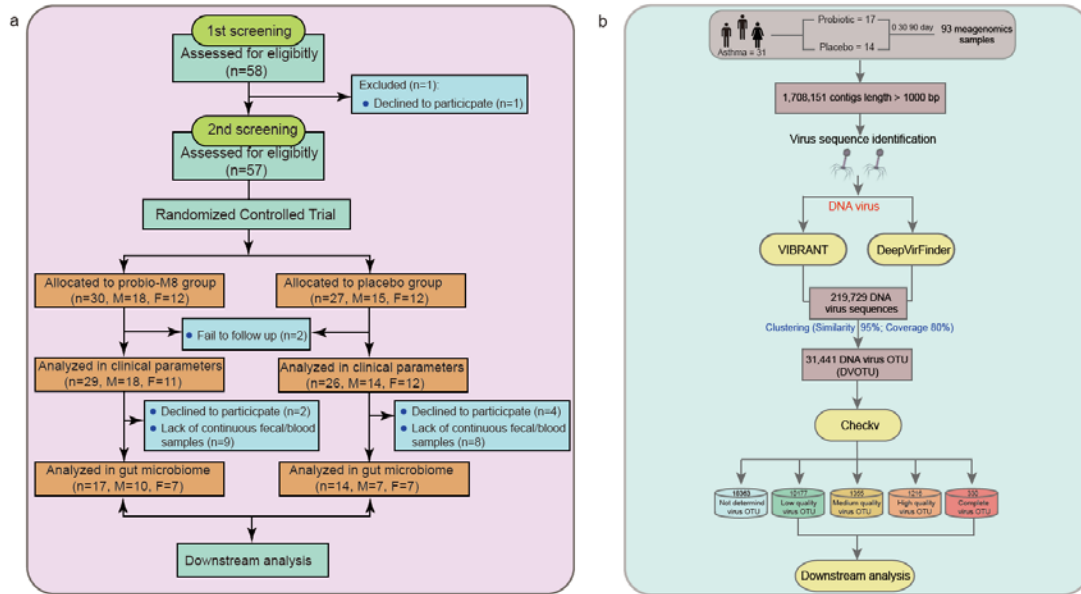

1

2 **Figure S1.** Patient selection process and identification of gut virome. (a) Information of screening

3 58 asthmatic patients for suitability of participating the clinical trial and samples collection. (b)

4 Flowchart showing the pipeline of identification, annotation, and classification of gut phage features

5 in the metagenome of asthmatic patients.

6

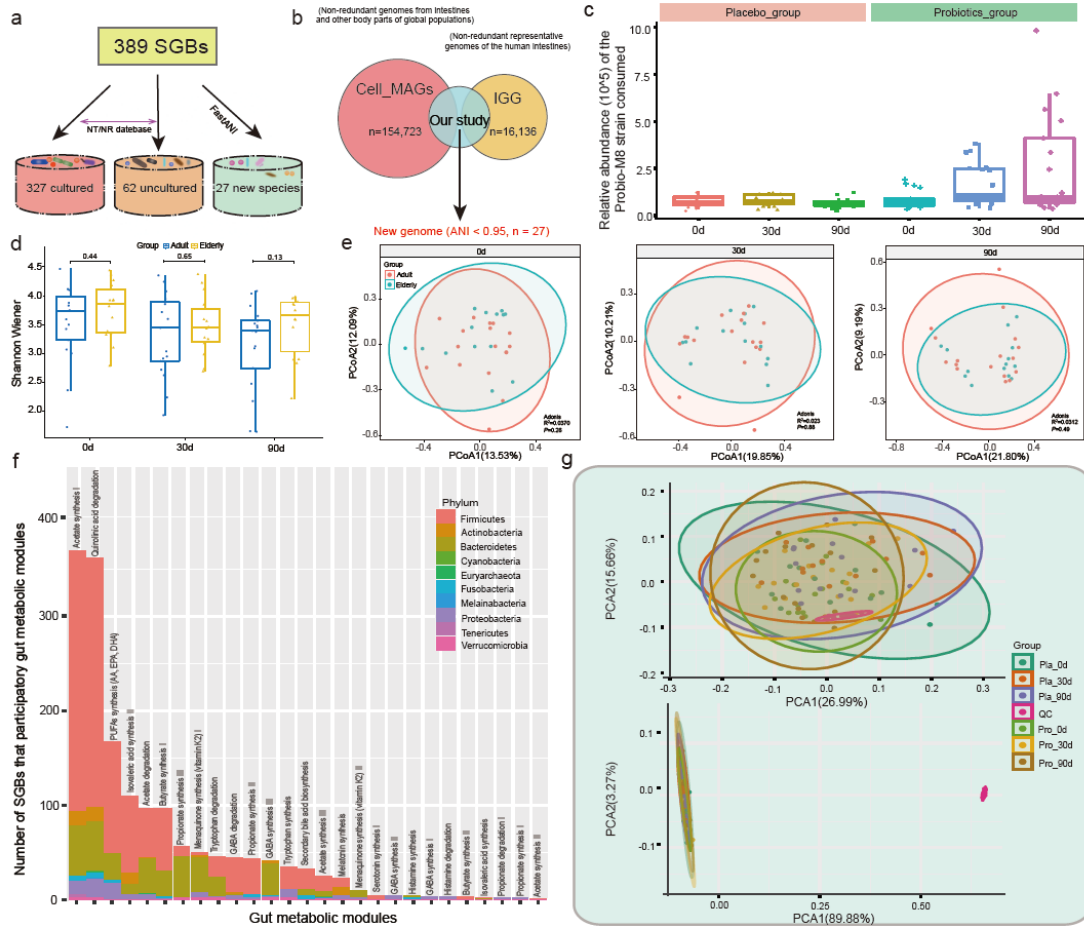

7

8 **Figure S2.** Genomic characteristics, metagenomic potential, and principle component analysis (PCA) of

9 serum metabolomes of probiotic (Pro) and placebo (Pla) groups. (a) Among the 389 identified species-

10 level genome bins (SGBs), 327 and 62 were previously cultured and uncultured, respectively. (b) Twenty-

11 seven SGBs did not match with existing isolates or metagenome-assembled genomes (MAGs) in two

12 major human microbiome datasets (IGG database and MAGs database established in Pasoli et al.). (c)

13 The relative abundance of genomes of Probio-M8 strain ( $10^5$ ) detected during the course of intervention.

14 (d) Shannon diversity index of the adult and elderly groups at days 0 (0d), 30 (30d), and 90 (90d). (e)

15 Principal coordinates analysis (PCoA) score plots of the the adult and elderly groups at different time

16 points. (f) Distribution of gut metabolic modules across SGBs, grouped by phylum. (g) PCA of serum

17 metabolome of the probiotic (Pro) and placebo (Pla) groups at day 0 (0d), day 30 (30d), and day 90 (90d).

18 The positive (upper) and negative (lower) ion collection mode the quality control (QC) samples clustered

19 tightly in the score plots, confirming a highly stable chromatographic condition.

20

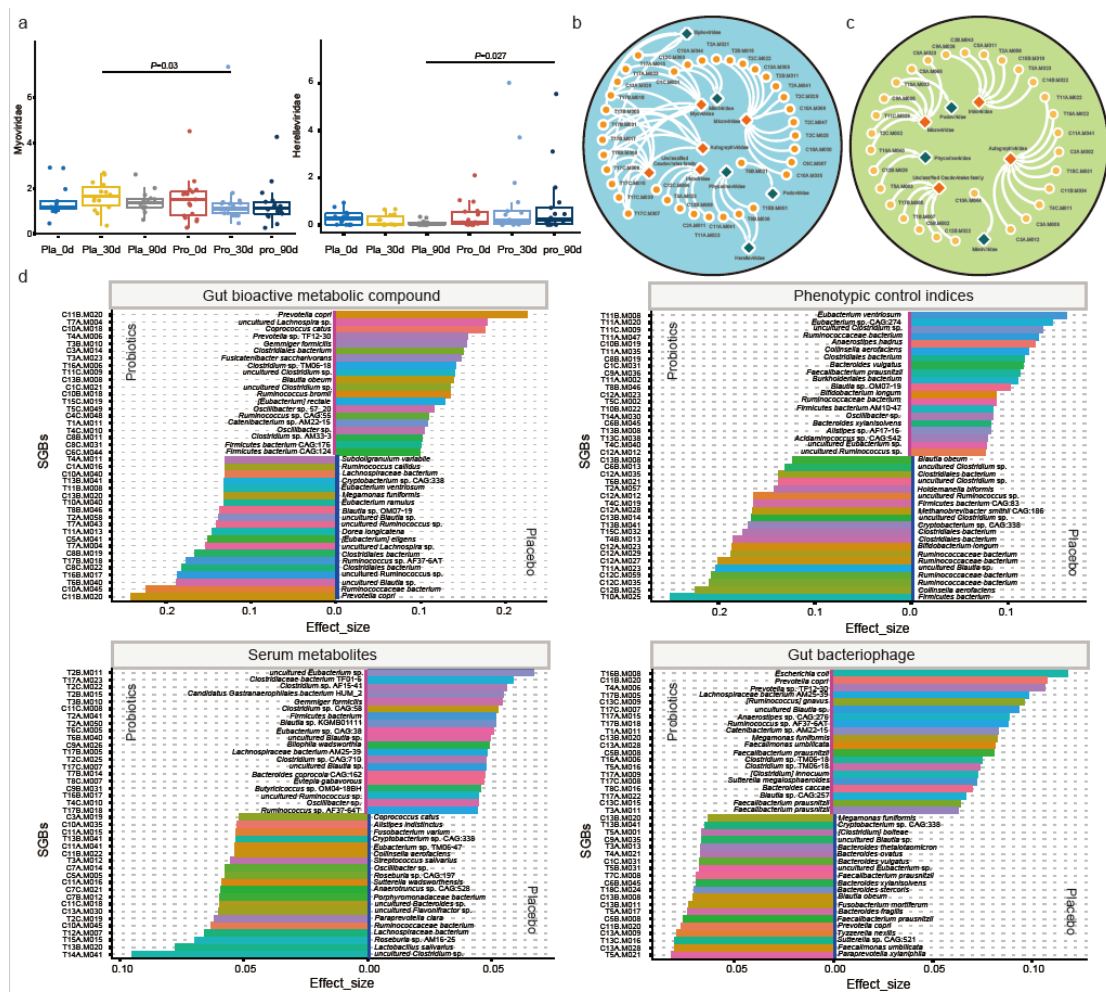

21

22 Figure S3. Significant differential gut bacteriophage, interactive correlation networks, effect size of

23 gut microbiota on monitored features. (a) Significant differences in Myovirida and Herellevirida

24 between the probiotic (Pro) and placebo (Pla) groups at day 0 (0d), day 30 (30d), and day 90 (90d).

25 P values of significantly different pairs are stated. Interactive correlation networks between the gut

26 species-level genome bins (SGBs) and virome in the (b) probiotic and (c) placebo groups. (d)

27 Significant effect size of the top 20 specific SGBs on the predicted gut bioactive metabolic

28 compound, clinical indexes, serum metabolites, and, gut bacteriophage.

29

Table S1. Information of subjects and samples

| Subject number | Subject Information |        |     |            |             |             |                                |                                        |                                                              |              |              | Demographic data of two groups |                  |               |                |
|----------------|---------------------|--------|-----|------------|-------------|-------------|--------------------------------|----------------------------------------|--------------------------------------------------------------|--------------|--------------|--------------------------------|------------------|---------------|----------------|
|                | Sample_ID           | Gender | Age | Group      | height (cm) | weight (kg) | History of smoking (year)      | Average daily alcohol consumption (mL) | Group_time (T: probiotic; C: placebo; A: d0; B: d30; C: d90) | Fecal sample | Blood sample |                                | Probiotics group | Placebo group | <i>P</i> value |
| 1              | Sample_T1A          |        |     |            |             |             |                                |                                        | TA                                                           | √            | √            | Male                           | 12               | 11            | -              |
|                | Sample_T1B          | F      | 28  | Probiotics | 174         | 65          | 10                             | 80                                     | TB                                                           | √            | √            | Female                         | 17               | 15            | -              |
|                | Sample_T1C          |        |     |            |             |             |                                |                                        | TC                                                           | √            | √            | Age                            | 54.62±9.61       | 57.08±10.46   | 0.17           |
| 2              | Sample_T2A          |        |     |            |             |             |                                |                                        | TA                                                           | √            | √            | BMI                            | 24.41±2.66       | 25.11±3.82    | 0.70           |
|                | Sample_T2B          | F      | 52  | Probiotics | 170         | 70          | 0                              | 70                                     | TB                                                           | √            | √            | Alcohol consumption            | 28.28±30.25      | 20.38±27.20   | 0.39           |
|                | Sample_T2C          |        |     |            |             |             |                                |                                        | TC                                                           | √            | √            | History of smoking (year)      | 21.33±9.07       | 29.00±12.36   | 0.30           |
| 3              | Sample_T3A          |        |     |            |             |             |                                |                                        | TA                                                           | √            | √            |                                |                  |               |                |
|                | Sample_T3B          | F      | 62  | Probiotics | 157         | 48          | 0                              | 50                                     | TB                                                           | √            | √            |                                |                  |               |                |
|                | Sample_T3C          |        |     |            |             |             |                                |                                        | TC                                                           | √            | √            |                                |                  |               |                |
| 4              | Sample_T4A          |        |     |            |             |             |                                |                                        | TA                                                           | √            | √            |                                |                  |               |                |
|                | Sample_T4B          | M      | 54  | Probiotics | 162         | 61          | 0                              | 0                                      | TB                                                           | √            | √            |                                |                  |               |                |
|                | Sample_T4C          |        |     |            |             |             |                                |                                        | TC                                                           | √            | √            |                                |                  |               |                |
| 5              | Sample_T5A          |        |     |            |             |             |                                |                                        | TA                                                           | √            | √            |                                |                  |               |                |
|                | Sample_T5B          | F      | 63  | Probiotics | 164         | 73          | 0                              | 50                                     | TB                                                           | √            | √            |                                |                  |               |                |
|                | Sample_T5C          |        |     |            |             |             |                                |                                        | TC                                                           | √            | √            |                                |                  |               |                |
| 6              | Sample_T6A          |        |     |            |             |             |                                |                                        | TA                                                           | √            | √            |                                |                  |               |                |
|                | Sample_T6B          | M      | 58  | Probiotics | 160         | 59          | 0                              | 0                                      | TB                                                           | √            | √            |                                |                  |               |                |
|                | Sample_T6C          |        |     |            |             |             |                                |                                        | TC                                                           | √            | √            |                                |                  |               |                |
| 7              | Sample_T7A          |        |     |            |             |             |                                |                                        | TA                                                           | √            | √            |                                |                  |               |                |
|                | Sample_T7B          | F      | 55  | Probiotics | 170         | 74          | 20 (Quit smoking for 10 years) | 50                                     | TB                                                           | √            | √            |                                |                  |               |                |
|                | Sample_T7C          |        |     |            |             |             |                                |                                        | TC                                                           | √            | √            |                                |                  |               |                |
| 8              | Sample_T8A          |        |     |            |             |             |                                |                                        | TA                                                           | √            | √            |                                |                  |               |                |
|                | Sample_T8B          | M      | 55  | Probiotics | 168         | 75.5        | 0                              | 50                                     | TB                                                           | √            | √            |                                |                  |               |                |
|                | Sample_T8C          |        |     |            |             |             |                                |                                        | TC                                                           | √            | √            |                                |                  |               |                |
| 9              | Sample_T9A          |        |     |            |             |             |                                |                                        | TA                                                           | -            | -            |                                |                  |               |                |
|                | Sample_T9B          | F      | 50  | Probiotics | 155         | 62.5        | 0                              | 70                                     | TB                                                           | -            | -            |                                |                  |               |                |
|                | Sample_T9C          |        |     |            |             |             |                                |                                        | TC                                                           | -            | -            |                                |                  |               |                |
| 10             | Sample_T10A         |        |     |            |             |             |                                |                                        | TA                                                           | √            | √            |                                |                  |               |                |
|                | Sample_T10B         | F      | 53  | Probiotics | 165         | 83          | 33                             | 50                                     | TB                                                           | √            | √            |                                |                  |               |                |
|                | Sample_T10C         |        |     |            |             |             |                                |                                        | TC                                                           | √            | √            |                                |                  |               |                |

|    |             |   |    |            |     |    |                               |    |    |   |   |
|----|-------------|---|----|------------|-----|----|-------------------------------|----|----|---|---|
|    | Sample_T11A |   |    |            |     |    |                               |    | TA | √ | √ |
| 11 | Sample_T11B | M | 57 | Probiotics | 152 | 58 | 0                             | 0  | TB | √ | √ |
|    | Sample_T11C |   |    |            |     |    |                               |    | TC | √ | √ |
|    | Sample_T12A |   |    |            |     |    |                               |    | TA | √ | √ |
| 12 | Sample_T12B | F | 49 | Probiotics | 184 | 90 | 0                             | 80 | TB | √ | √ |
|    | Sample_T12C |   |    |            |     |    |                               |    | TC | √ | √ |
|    | Sample_T13A |   |    |            |     |    |                               |    | TA | √ | √ |
| 13 | Sample_T13B | F | 58 | Probiotics | 159 | 55 | 25 (Quit smoking for 6 years) |    | TB | √ | √ |
|    | Sample_T13C |   |    |            |     |    |                               |    | TC | √ | √ |
|    | Sample_T14A |   |    |            |     |    |                               |    | TA | √ | √ |
| 14 | Sample_T14B | M | 54 | Probiotics | 150 | 57 | 0                             | 0  | TB | √ | √ |
|    | Sample_T14C |   |    |            |     |    |                               |    | TC | √ | √ |
|    | Sample_T15A |   |    |            |     |    |                               |    | TA | √ | √ |
| 15 | Sample_T15B | M | 68 | Probiotics | 147 | 52 | 0                             | 0  | TB | √ | √ |
|    | Sample_T15C |   |    |            |     |    |                               |    | TC | √ | √ |
|    | Sample_T16A |   |    |            |     |    |                               |    | TA | √ | √ |
| 16 | Sample_T16B | F | 59 | Probiotics | 174 | 71 | 28 (Quit smoking for 6 years) |    | TB | √ | √ |
|    | Sample_T16C |   |    |            |     |    |                               |    | TC | √ | √ |
|    | Sample_T17A |   |    |            |     |    |                               |    | TA | √ | √ |
| 17 | Sample_T17B | M | 59 | Probiotics | 162 | 60 | 0                             | 0  | TB | √ | √ |
|    | Sample_T17C |   |    |            |     |    |                               |    | TC | √ | √ |
|    | Sample_T18A |   |    |            |     |    |                               |    | TA | √ | √ |
| 18 | Sample_T18B | M | 57 | Probiotics | 162 | 61 | 0                             | 0  | TB | √ | √ |
|    | Sample_T18C |   |    |            |     |    |                               |    | TC | √ | √ |
|    | Sample_T19A |   |    |            |     |    |                               |    | TA | - | - |
| 19 | Sample_T19B | M | 38 | Probiotics | 163 | 51 | 0                             | 20 | TB | - | - |
|    | Sample_T19C |   |    |            |     |    |                               |    | TC | - | - |
|    | Sample_T20A |   |    |            |     |    |                               |    | TA | - | - |
| 20 | Sample_T20B | M | 72 | Probiotics | 169 | 75 | 0                             | 0  | TB | - | - |
|    | Sample_T20C |   |    |            |     |    |                               |    | TC | - | - |
|    | Sample_T21A |   |    |            |     |    |                               |    | TA | - | - |
| 21 | Sample_T21B | M | 54 | Probiotics | 154 | 67 | 0                             | 0  | TB | - | - |
|    | Sample_T21C |   |    |            |     |    |                               |    | TC | - | - |
|    | Sample_T22A |   |    |            |     |    |                               |    | TA | - | - |
| 22 | Sample_T22B | M | 51 | Probiotics | 165 | 59 | 0                             | 0  | TB | - | - |
|    | Sample_T22C |   |    |            |     |    |                               |    | TC | - | - |

|    |             |   |    |            |     |      |                                |    |    |   |   |
|----|-------------|---|----|------------|-----|------|--------------------------------|----|----|---|---|
|    | Sample_T23A |   |    |            |     |      |                                |    | TA | - | - |
| 23 | Sample_T23B | F | 63 | Probiotics | 160 | 67   | 0                              | 30 | TB | - | - |
|    | Sample_T23C |   |    |            |     |      |                                |    | TC | - | - |
|    | Sample_T24A |   |    |            |     |      |                                |    | TA | - | - |
| 24 | Sample_T24B | M | 49 | Probiotics | 167 | 67   | 0                              | 0  | TB | - | - |
|    | Sample_T24C |   |    |            |     |      |                                |    | TC | - | - |
|    | Sample_T25A |   |    |            |     |      |                                |    | TA | - | - |
| 25 | Sample_T25B | M | 63 | Probiotics | 152 | 64   | 0                              | 0  | TB | - | - |
|    | Sample_T25C |   |    |            |     |      |                                |    | TC | - | - |
|    | Sample_T26A |   |    |            |     |      |                                |    | TA | - | - |
| 26 | Sample_T26B | F | 50 | Probiotics | 169 | 60   | 12                             | 50 | TB | - | - |
|    | Sample_T26C |   |    |            |     |      |                                |    | TC | - | - |
|    | Sample_T27A |   |    |            |     |      |                                |    | TA | - | - |
| 27 | Sample_T27B | M | 50 | Probiotics | 150 | 55   | 0                              | 0  | TB | - | - |
|    | Sample_T27C |   |    |            |     |      |                                |    | TC | - | - |
|    | Sample_T28A |   |    |            |     |      |                                |    | TA | - | - |
| 28 | Sample_T28B | M | 69 | Probiotics | 150 | 50   | 0                              | 0  | TB | - | - |
|    | Sample_T28C |   |    |            |     |      |                                |    | TC | - | - |
|    | Sample_T29A |   |    |            |     |      |                                |    | TA | - | - |
| 29 | Sample_T29B | M | 34 | Probiotics | 164 | 72.5 | 0                              | 50 | TB | - | - |
|    | Sample_T29C |   |    |            |     |      |                                |    | TC | - | - |
|    | Sample_C1A  |   |    |            |     |      |                                |    | CA | √ | √ |
| 30 | Sample_C1B  | F | 63 | Placebo    | 165 | 58   | 43                             | 50 | CB | √ | √ |
|    | Sample_C1C  |   |    |            |     |      |                                |    | CC | √ | √ |
|    | Sample_C2A  |   |    |            |     |      |                                |    | CA | √ | √ |
| 31 | Sample_C2B  | M | 61 | Placebo    | 175 | 61   | 0                              | 0  | CB | √ | √ |
|    | Sample_C2C  |   |    |            |     |      |                                |    | CC | √ | √ |
|    | Sample_C3A  |   |    |            |     |      |                                |    | CA | √ | √ |
| 32 | Sample_C3B  | F | 65 | Placebo    | 169 | 85   | 30 (Quit smoking for 20 years) | 30 | CB | √ | √ |
|    | Sample_C3C  |   |    |            |     |      |                                |    | CC | √ | √ |
|    | Sample_C4A  |   |    |            |     |      |                                |    | CA | √ | √ |
| 33 | Sample_C4B  | M | 52 | Placebo    | 163 | 57   | 0                              | 0  | CB | √ | √ |
|    | Sample_C4C  |   |    |            |     |      |                                |    | CC | √ | √ |
|    | Sample_C5A  |   |    |            |     |      |                                |    | CA | √ | √ |
| 34 | Sample_C5B  | M | 65 | Placebo    | 160 | 70   | 0                              | 0  | CB | √ | √ |
|    | Sample_C5C  |   |    |            |     |      |                                |    | CC | √ | √ |

|    |             |   |    |         |     |    |                                |    |    |   |   |
|----|-------------|---|----|---------|-----|----|--------------------------------|----|----|---|---|
|    | Sample_C6A  |   |    |         |     |    |                                |    | CA | √ | √ |
| 35 | Sample_C6B  | M | 64 | Placebo | 158 | 79 | 0                              | 0  | CB | √ | √ |
|    | Sample_C6C  |   |    |         |     |    |                                |    | CC | √ | √ |
|    | Sample_C7A  |   |    |         |     |    |                                |    | CA | √ | √ |
| 36 | Sample_C7B  | M | 71 | Placebo | 156 | 83 | 0                              | 0  | CB | √ | √ |
|    | Sample_C7C  |   |    |         |     |    |                                |    | CC | √ | √ |
|    | Sample_C8A  |   |    |         |     |    |                                |    | CA | √ | √ |
| 37 | Sample_C8B  | M | 61 | Placebo | 164 | 65 | 31 (Quit smoking for 7 years)  |    | CB | √ | √ |
|    | Sample_C8C  |   |    |         |     |    |                                |    | CC | √ | √ |
|    | Sample_C9A  |   |    |         |     |    |                                |    | CA | √ | √ |
| 38 | Sample_C9B  | F | 36 | Placebo | 165 | 65 | 0                              | 80 | CB | √ | √ |
|    | Sample_C9C  |   |    |         |     |    |                                |    | CC | √ | √ |
|    | Sample_C10A |   |    |         |     |    |                                |    | CA | √ | √ |
| 39 | Sample_C10B | F | 65 | Placebo | 161 | 57 | 0                              | 20 | CB | √ | √ |
|    | Sample_C10C |   |    |         |     |    |                                |    | CC | √ | √ |
|    | Sample_C11A |   |    |         |     |    |                                |    | CA | √ | √ |
| 40 | Sample_C11B | M | 67 | Placebo | 158 | 70 | 0                              | 0  | CB | √ | √ |
|    | Sample_C11C |   |    |         |     |    |                                |    | CC | √ | √ |
|    | Sample_C12A |   |    |         |     |    |                                |    | CA | √ | √ |
| 41 | Sample_C12B | F | 62 | Placebo | 176 | 70 | 0                              | 30 | CB | √ | √ |
|    | Sample_C12C |   |    |         |     |    |                                |    | CC | √ | √ |
|    | Sample_C13A |   |    |         |     |    |                                |    | CA | √ | √ |
| 42 | Sample_C13B | F | 62 | Placebo | 151 | 50 | 40                             | 0  | CB | √ | √ |
|    | Sample_C13C |   |    |         |     |    |                                |    | CC | √ | √ |
|    | Sample_C14A |   |    |         |     |    |                                |    | CA | √ | √ |
| 43 | Sample_C14B | M | 36 | Placebo | 161 | 52 | 0                              | 30 | CB | √ | √ |
|    | Sample_C14C |   |    |         |     |    |                                |    | CC | √ | √ |
|    | Sample_C15A |   |    |         |     |    |                                |    | CA | - | - |
| 44 | Sample_C15B | F | 45 | Placebo | 168 | 55 | 10 (Quit smoking for 1 months) |    | CB | - | - |
|    | Sample_C15C |   |    |         |     |    |                                |    | CC | - | - |
|    | Sample_C16A |   |    |         |     |    |                                |    | CA | - | - |
| 45 | Sample_C16B | F | 68 | Placebo | 180 | 84 | 0                              | 0  | CB | - | - |
|    | Sample_C16C |   |    |         |     |    |                                |    | CC | - | - |
|    | Sample_C17A |   |    |         |     |    |                                |    | CA | - | - |
| 46 | Sample_C17B | M | 40 | Placebo | 160 | 60 | 0                              | 30 | CB | - | - |
|    | Sample_C17C |   |    |         |     |    |                                |    | CC | - | - |

|    |             |   |    |         |     |      |                                |    |    |   |   |
|----|-------------|---|----|---------|-----|------|--------------------------------|----|----|---|---|
|    | Sample_C18A |   |    |         |     |      |                                |    | CA | - | - |
| 47 | Sample_C18B | F | 46 | Placebo | 180 | 79   | 0                              | 50 | CB | - | - |
|    | Sample_C18C |   |    |         |     |      |                                |    | CC | - | - |
|    | Sample_C19A |   |    |         |     |      |                                |    | CA | - | - |
| 48 | Sample_C19B | M | 64 | Placebo | 150 | 68   | 0                              | 0  | CB | - | - |
|    | Sample_C19C |   |    |         |     |      |                                |    | CC | - | - |
|    | Sample_C20A |   |    |         |     |      |                                |    | CA | - | - |
| 49 | Sample_C20B | M | 61 | Placebo | 158 | 65.5 | 0                              | 0  | CB | - | - |
|    | Sample_C20C |   |    |         |     |      |                                |    | CC | - | - |
|    | Sample_C21A |   |    |         |     |      |                                |    | CA | - | - |
| 50 | Sample_C21B | M | 41 | Placebo | 161 | 64   | 0                              | 10 | CB | - | - |
|    | Sample_C21C |   |    |         |     |      |                                |    | CC | - | - |
|    | Sample_C22A |   |    |         |     |      |                                |    | CA | - | - |
| 51 | Sample_C22B | F | 61 | Placebo | 170 | 73   | 20 (Quit smoking for 12 years) | 50 | CB | - | - |
|    | Sample_C22C |   |    |         |     |      |                                |    | CC | - | - |
|    | Sample_C23A |   |    |         |     |      |                                |    | CA | - | - |
| 52 | Sample_C23B | F | 48 | Placebo | 170 | 70   | 0                              | 80 | CB | - | - |
|    | Sample_C23C |   |    |         |     |      |                                |    | CC | - | - |
|    | Sample_C24A |   |    |         |     |      |                                |    | CA | - | - |
| 53 | Sample_C24B | M | 54 | Placebo | 158 | 76   | 0                              | 0  | CB | - | - |
|    | Sample_C24C |   |    |         |     |      |                                |    | CC | - | - |
|    | Sample_C25A |   |    |         |     |      |                                |    | CA | - | - |
| 54 | Sample_C25B | M | 63 | Placebo | 158 | 66.5 | 0                              | 0  | CB | - | - |
|    | Sample_C25C |   |    |         |     |      |                                |    | CC | - | - |
|    | Sample_C26A |   |    |         |     |      |                                |    | CA | - | - |
| 55 | Sample_C26B | M | 63 | Placebo | 172 | 70   | 0                              | 0  | CB | - | - |
|    | Sample_C26C |   |    |         |     |      |                                |    | CC | - | - |



Table S2. Metagenome sequencing and assembly statistics

| Sample ID   | Amount of generated data |                  | Assembly results  |                   |                 |                 |                 |
|-------------|--------------------------|------------------|-------------------|-------------------|-----------------|-----------------|-----------------|
|             | Raw data (Gbp)           | Clean data (Gbp) | Number of contigs | Total length (bp) | N50 length (bp) | N90 length (bp) | Max length (bp) |
| Sample_T1A  | 5.99                     | 5.90             | 6050              | 52670167          | 17297           | 3070            | 346711          |
| Sample_T1B  | 4.53                     | 4.45             | 4130              | 42119467          | 23186           | 3347            | 453789          |
| Sample_T1C  | 6.86                     | 6.69             | 6954              | 46301602          | 10218           | 2627            | 402043          |
| Sample_T2A  | 6.18                     | 6.10             | 27518             | 226016731         | 16280           | 2854            | 646320          |
| Sample_T2B  | 6.36                     | 6.28             | 31824             | 236029712         | 13369           | 2705            | 621851          |
| Sample_T2C  | 8.54                     | 8.39             | 22951             | 208148618         | 22492           | 2941            | 731178          |
| Sample_T3A  | 7.16                     | 7.06             | 14937             | 151105738         | 24656           | 3290            | 550226          |
| Sample_T3B  | 6.10                     | 6.01             | 17761             | 146547381         | 19518           | 2739            | 456946          |
| Sample_T3C  | 6.28                     | 6.17             | 12286             | 146145572         | 33722           | 3675            | 549872          |
| Sample_T4A  | 6.31                     | 6.20             | 14100             | 150765621         | 36208           | 3249            | 527538          |
| Sample_T4B  | 6.05                     | 5.93             | 27618             | 212836547         | 15689           | 2700            | 552032          |
| Sample_T4C  | 7.97                     | 7.80             | 14643             | 163634995         | 32436           | 3507            | 740622          |
| Sample_T5A  | 7.50                     | 7.32             | 7759              | 121596366         | 49637           | 4887            | 590821          |
| Sample_T5B  | 6.25                     | 6.15             | 12480             | 158936823         | 34732           | 4083            | 540098          |
| Sample_T5C  | 5.84                     | 5.76             | 22099             | 189754247         | 19154           | 2902            | 695358          |
| Sample_T6A  | 6.30                     | 6.18             | 25546             | 191811239         | 13130           | 2751            | 588470          |
| Sample_T6B  | 8.58                     | 8.44             | 18196             | 169064696         | 22442           | 3015            | 551712          |
| Sample_T6C  | 5.83                     | 5.74             | 22313             | 186054064         | 16682           | 2873            | 414165          |
| Sample_T7A  | 7.26                     | 7.14             | 24162             | 195851464         | 15629           | 2870            | 692608          |
| Sample_T7B  | 6.74                     | 6.62             | 14361             | 126420843         | 18185           | 3016            | 694320          |
| Sample_T7C  | 6.76                     | 6.64             | 12264             | 99343893          | 16423           | 2794            | 383815          |
| Sample_T8A  | 6.49                     | 6.39             | 24904             | 210097222         | 16441           | 2944            | 462866          |
| Sample_T8B  | 6.20                     | 6.11             | 31703             | 223870896         | 10979           | 2718            | 451461          |
| Sample_T8C  | 5.87                     | 5.74             | 17179             | 171686222         | 30942           | 3022            | 451666          |
| Sample_T10A | 8.92                     | 8.71             | 18630             | 192772309         | 25428           | 3333            | 445295          |
| Sample_T10B | 8.36                     | 8.25             | 18675             | 152645564         | 16394           | 2867            | 567911          |
| Sample_T10C | 5.44                     | 5.30             | 7803              | 69464031          | 20196           | 2944            | 254942          |
| Sample_T11A | 7.45                     | 7.32             | 17242             | 183303516         | 28832           | 3307            | 754951          |
| Sample_T11B | 8.49                     | 8.34             | 21380             | 186241197         | 17732           | 3045            | 751021          |
| Sample_T11C | 7.53                     | 7.44             | 19740             | 182842861         | 20631           | 3101            | 640277          |
| Sample_T12A | 6.04                     | 5.94             | 32456             | 238349809         | 12653           | 2718            | 344909          |
| Sample_T12B | 6.68                     | 6.59             | 15455             | 121227734         | 14515           | 2812            | 564984          |
| Sample_T12C | 6.27                     | 6.14             | 17631             | 134937085         | 17425           | 2649            | 351530          |

|             |      |      |       |           |       |      |        |
|-------------|------|------|-------|-----------|-------|------|--------|
| Sample_T13A | 7.54 | 7.46 | 16976 | 136063050 | 15838 | 2848 | 595503 |
| Sample_T13B | 6.98 | 6.88 | 21642 | 210541158 | 23017 | 3198 | 632246 |
| Sample_T13C | 7.58 | 7.50 | 16638 | 156894306 | 23100 | 3112 | 712395 |
| Sample_T14A | 7.65 | 7.58 | 20823 | 184413291 | 21509 | 2883 | 688516 |
| Sample_T14B | 6.89 | 6.78 | 20913 | 179326000 | 17684 | 2980 | 531669 |
| Sample_T14C | 6.09 | 6.01 | 13130 | 124410772 | 22394 | 3053 | 820226 |
| Sample_T15A | 7.58 | 7.51 | 18874 | 174222364 | 28396 | 2870 | 473217 |
| Sample_T15B | 6.90 | 6.79 | 10609 | 77771877  | 13890 | 2630 | 405107 |
| Sample_T15C | 6.77 | 6.66 | 14929 | 153411347 | 26628 | 3271 | 433776 |
| Sample_T16A | 6.56 | 6.46 | 12312 | 104376060 | 17024 | 2907 | 612330 |
| Sample_T16B | 6.76 | 6.63 | 20236 | 189951316 | 20295 | 3160 | 603995 |
| Sample_T16C | 6.59 | 6.54 | 16612 | 165287718 | 22265 | 3294 | 638797 |
| Sample_T17A | 8.38 | 8.31 | 6528  | 96876907  | 50427 | 4599 | 472243 |
| Sample_T17B | 5.13 | 5.05 | 6006  | 78962194  | 38961 | 4054 | 306980 |
| Sample_T17C | 6.67 | 6.58 | 3612  | 61065723  | 55299 | 5496 | 511205 |
| Sample_T18A | 6.31 | 6.27 | 15674 | 112990839 | 13045 | 2620 | 678232 |
| Sample_T18B | 6.13 | 6.07 | 12884 | 115426869 | 19920 | 2999 | 599982 |
| Sample_T18C | 5.64 | 5.56 | 14282 | 118701362 | 18913 | 2794 | 809736 |
| Sample_C1A  | 6.18 | 6.05 | 27217 | 209761058 | 14372 | 2761 | 648305 |
| Sample_C1B  | 7.82 | 7.70 | 30659 | 243796716 | 14641 | 2853 | 648307 |
| Sample_C1C  | 7.49 | 7.36 | 21535 | 207423146 | 25868 | 3048 | 682022 |
| Sample_C2A  | 6.51 | 6.39 | 31414 | 230997178 | 12779 | 2714 | 450207 |
| Sample_C2B  | 6.05 | 5.94 | 29061 | 213734904 | 13326 | 2680 | 591300 |
| Sample_C2C  | 6.46 | 6.35 | 25918 | 182189392 | 11524 | 2635 | 518369 |
| Sample_C3A  | 9.05 | 8.89 | 24100 | 211087657 | 18683 | 2980 | 607327 |
| Sample_C3B  | 7.07 | 6.94 | 17798 | 137319044 | 15395 | 2702 | 421149 |
| Sample_C3C  | 6.65 | 6.53 | 20281 | 170882575 | 17728 | 2847 | 601314 |
| Sample_C4A  | 7.20 | 7.09 | 23574 | 194266410 | 17165 | 2821 | 670344 |
| Sample_C4B  | 7.46 | 7.32 | 24491 | 197632278 | 15838 | 2835 | 427886 |
| Sample_C4C  | 6.76 | 6.65 | 25139 | 203698369 | 15721 | 2822 | 511367 |
| Sample_C5A  | 8.78 | 8.63 | 32301 | 267168305 | 15642 | 2934 | 537570 |
| Sample_C5B  | 5.71 | 5.60 | 10101 | 89606192  | 30814 | 2812 | 810636 |
| Sample_C5C  | 5.76 | 5.66 | 13327 | 94926203  | 12318 | 2622 | 907762 |
| Sample_C6A  | 6.53 | 6.43 | 21187 | 174182697 | 18476 | 2797 | 398012 |
| Sample_C6B  | 9.86 | 9.69 | 22775 | 210690124 | 22369 | 3002 | 534576 |
| Sample_C6C  | 7.12 | 7.03 | 23545 | 209758755 | 20261 | 2955 | 477265 |
| Sample_C7A  | 6.71 | 6.59 | 16150 | 135237611 | 16692 | 2942 | 513072 |
| Sample_C7B  | 6.53 | 6.44 | 16711 | 132313563 | 15682 | 2795 | 487303 |
| Sample_C7C  | 5.82 | 5.72 | 9467  | 85412901  | 21881 | 2907 | 531694 |

|             |      |      |       |           |       |      |        |
|-------------|------|------|-------|-----------|-------|------|--------|
| Sample_C8A  | 6.35 | 5.39 | 17358 | 145086100 | 17287 | 2857 | 589334 |
| Sample_C8B  | 8.01 | 7.89 | 21083 | 171882388 | 16589 | 2835 | 518489 |
| Sample_C8C  | 6.02 | 5.92 | 19727 | 188947650 | 24379 | 3051 | 631233 |
| Sample_C9A  | 7.57 | 7.43 | 15364 | 181347127 | 39148 | 3548 | 759225 |
| Sample_C9B  | 7.40 | 7.25 | 13716 | 141314666 | 34928 | 3075 | 418923 |
| Sample_C9C  | 7.85 | 7.75 | 11812 | 114473846 | 25387 | 3108 | 414054 |
| Sample_C10A | 8.62 | 8.44 | 32037 | 273916895 | 19230 | 2885 | 607318 |
| Sample_C10B | 6.53 | 6.48 | 13571 | 120705521 | 21144 | 2938 | 609179 |
| Sample_C10C | 7.60 | 7.46 | 22639 | 161269981 | 11435 | 2693 | 522063 |
| Sample_C11A | 7.47 | 7.40 | 18492 | 178557786 | 23851 | 3096 | 705957 |
| Sample_C11B | 5.48 | 5.43 | 24674 | 202424270 | 16860 | 2832 | 700562 |
| Sample_C11C | 8.19 | 8.10 | 17786 | 152571418 | 21209 | 2840 | 706417 |
| Sample_C12A | 6.28 | 6.23 | 24335 | 188292709 | 13324 | 2840 | 516307 |
| Sample_C12B | 7.32 | 7.22 | 18130 | 157020811 | 19211 | 2900 | 546119 |
| Sample_C12C | 8.57 | 8.42 | 24236 | 213253342 | 18897 | 2980 | 489255 |
| Sample_C13A | 6.64 | 6.56 | 12623 | 144980888 | 31354 | 3636 | 489148 |
| Sample_C13B | 6.19 | 6.10 | 10087 | 121978809 | 34466 | 3796 | 354745 |
| Sample_C13C | 6.10 | 5.99 | 11357 | 113373326 | 30310 | 3076 | 409731 |
| Sample_C14A | 6.24 | 6.09 | 20914 | 168934471 | 15190 | 2873 | 492714 |
| Sample_C14B | 6.06 | 5.99 | 8989  | 88297145  | 29615 | 3036 | 438640 |
| Sample_C14C | 8.33 | 8.17 | 18050 | 151909837 | 16325 | 2935 | 507677 |

Table S3. Clinical indicators for asthma measured before, during, and after the trial (n=55)

| Clinical indicators for asthma              | Day 0                |                    |                    |                  |                           | Day 30               |                    |                    |                  |                           | Day 90               |                      |                    |                    |                           |
|---------------------------------------------|----------------------|--------------------|--------------------|------------------|---------------------------|----------------------|--------------------|--------------------|------------------|---------------------------|----------------------|----------------------|--------------------|--------------------|---------------------------|
|                                             | Result statistics    |                    |                    |                  | Corrected P-value, T-test | Result statistics    |                    |                    |                  | Corrected P-value, T-test | Result statistics    |                      |                    |                    | Corrected P-value, T-test |
|                                             | Mean Probiotic group | Mean Placebo group | SD Probiotic group | SD Placebo group |                           | Mean Probiotic group | Mean Placebo group | SD Probiotic group | SD Placebo group |                           | Probiotic vs Placebo | Mean Probiotic group | Mean Placebo group | SD Probiotic group |                           |
| Asthma Control Test score                   | 19.28                | 19.96              | 4.85               | 4.76             | 1.00                      | 21.89                | 21.38              | 3.53               | 4.29             | 1.00                      | 23.13                | 20.81                | 1.86               | 4.09               | 0.02                      |
| Alveolar nitric oxide concentration (ppb)   | 6.19                 | 12.74              | 3.08               | 9.05             | 0.37                      | 3.69                 | 8.66               | 2.21               | 9.27             | 0.04                      | 3.59                 | 10.36                | 2.36               | 8.87               | 0.00                      |
| Fractional exhaled nitric oxide (ppb)       | 50.31                | 60.42              | 50.29              | 59.47            | 1.00                      | 27.59                | 40.96              | 23.07              | 34.18            | 0.05                      | 35.03                | 46.69                | 21.01              | 37.59              | 1.00                      |
| Forced vital capacity (%)                   | 111.97               | 109.31             | 14.52              | 21.54            | 0.89                      | 113.62               | 109.88             | 15.09              | 15.31            | 1.00                      | 114.03               | 111.62               | 16.42              | 24.14              | 1.00                      |
| Forced expiratory volume in 1 second (%)    | 88.55                | 88.65              | 25.40              | 23.17            | 1.00                      | 90.45                | 88.85              | 24.44              | 17.23            | 1.00                      | 88.41                | 88.92                | 25.27              | 23.82              | 0.99                      |
| FEV1/FVC (%)                                | 76.41                | 79.08              | 18.72              | 13.72            | 0.99                      | 77.48                | 79.15              | 18.88              | 12.99            | 1.00                      | 75.59                | 77.77                | 19.37              | 13.70              | 1.00                      |
| Peak expiratory flow (%)                    | 91.66                | 83.19              | 32.21              | 22.67            | 1.00                      | 94.72                | 87.92              | 30.50              | 21.23            | 0.99                      | 96.21                | 88.58                | 36.65              | 23.99              | 0.99                      |
| Immunoglobulin E (IU/mL)                    | 229.02               | 171.10             | 260.50             | 181.44           | 1.00                      | 224.12               | 225.15             | 269.02             | 228.79           | 1.00                      | 222.58               | 222.73               | 253.20             | 233.62             | 1.00                      |
| Eosinophils (%)                             | 3.65                 | 3.41               | 3.95               | 3.15             | 1.00                      | 3.06                 | 3.72               | 2.71               | 2.78             | 1.00                      | 3.43                 | 4.29                 | 2.50               | 3.99               | 1.00                      |
| Total Lymphocyte Count (10 <sup>9</sup> /L) | 2.08                 | 1.90               | 0.52               | 0.54             | 1.00                      | 1.84                 | 1.97               | 0.50               | 0.52             | 1.00                      | 1.87                 | 1.98                 | 0.53               | 0.51               | 1.00                      |

Table S4. Genomic information of 2601 high-quality metagenome-assembled genomes (MAGs)

| MAG ID             | Completeness (%) | Contamination (%) | Number of contigs | GC content (%) | Checkm lineage      | N50 length (bp) | Genome size (Mbp) |
|--------------------|------------------|-------------------|-------------------|----------------|---------------------|-----------------|-------------------|
| Sample_T5C_bin.26  | 98.65            | 0.34              | 42                | 39             | Clostridiales       | 39              | 2.11              |
| Sample_T5C_bin.27  | 97.95            | 0.68              | 230               | 56.3           | Clostridiales       | 56.3            | 2.57              |
| Sample_T5C_bin.25  | 83.18            | 1.03              | 389               | 46.3           | Bacteroidales       | 46.3            | 3.00              |
| Sample_T5C_bin.22  | 99.27            | 0.00              | 15                | 41.6           | Lachnospiraceae     | 41.6            | 2.71              |
| Sample_T5C_bin.28  | 95.67            | 0.48              | 102               | 60.3           | Bacteroidetes       | 60.3            | 2.57              |
| Sample_T5C_bin.29  | 92.41            | 3.37              | 34                | 26.7           | Bacteria            | 26.7            | 1.31              |
| Sample_C1B_bin.33  | 80.86            | 1.01              | 23                | 43.4           | Clostridiales       | 43.4            | 2.27              |
| Sample_C1B_bin.31  | 99.30            | 1.17              | 358               | 58             | Clostridiales       | 58              | 3.12              |
| Sample_C1B_bin.30  | 99.32            | 0.34              | 99                | 36.6           | Clostridiales       | 36.6            | 2.09              |
| Sample_C1B_bin.35  | 84.90            | 0.56              | 207               | 24.9           | Bacteria            | 24.9            | 1.54              |
| Sample_C1B_bin.39  | 98.91            | 3.12              | 69                | 43.1           | Lachnospiraceae     | 43.1            | 3.28              |
| Sample_C10B_bin.6  | 94.92            | 0.97              | 87                | 41.9           | Lachnospiraceae     | 41.9            | 2.92              |
| Sample_C14A_bin.39 | 98.44            | 0.00              | 37                | 36.7           | Clostridiales       | 36.7            | 2.97              |
| Sample_C6B_bin.38  | 94.17            | 1.33              | 61                | 42.7           | Lachnospiraceae     | 42.7            | 3.36              |
| Sample_C14A_bin.33 | 93.84            | 1.38              | 77                | 60.6           | Clostridiales       | 60.6            | 2.30              |
| Sample_C14A_bin.32 | 97.04            | 0.63              | 57                | 48             | Clostridiales       | 48              | 3.10              |
| Sample_C14A_bin.31 | 90.36            | 0.89              | 228               | 33.1           | Clostridiales       | 33.1            | 2.34              |
| Sample_C14A_bin.30 | 99.25            | 0.12              | 146               | 54.2           | Actinobacteria      | 54.2            | 1.67              |
| Sample_C14A_bin.37 | 93.24            | 0.57              | 170               | 62.9           | Bifidobacteriaceae  | 62.9            | 1.92              |
| Sample_C6B_bin.31  | 90.55            | 0.22              | 307               | 40.5           | Bacteroidales       | 40.5            | 2.81              |
| Sample_C6B_bin.32  | 86.74            | 3.80              | 47                | 41.4           | Clostridiales       | 41.4            | 2.56              |
| Sample_C14A_bin.34 | 91.49            | 0.68              | 219               | 56.4           | Clostridiales       | 56.4            | 2.26              |
| Sample_T5A_bin.19  | 94.17            | 1.49              | 97                | 40.7           | Bacteroidales       | 40.7            | 3.41              |
| Sample_T5A_bin.18  | 93.35            | 0.63              | 170               | 49.3           | Clostridiales       | 49.3            | 2.42              |
| Sample_C8C_bin.28  | 98.65            | 0.00              | 39                | 41.8           | Clostridiales       | 41.8            | 2.79              |
| Sample_C8C_bin.26  | 89.62            | 2.02              | 412               | 64.1           | Actinobacteria      | 64.1            | 2.09              |
| Sample_C8C_bin.27  | 97.46            | 0.32              | 151               | 41.8           | Clostridiales       | 41.8            | 3.03              |
| Sample_C8C_bin.24  | 96.41            | 0.95              | 80                | 48.5           | Clostridiales       | 48.5            | 2.76              |
| Sample_C8C_bin.25  | 85.19            | 1.01              | 407               | 36.4           | Clostridiales       | 36.4            | 2.67              |
| Sample_C8C_bin.22  | 99.30            | 0.93              | 484               | 58.2           | Clostridiales       | 58.2            | 3.00              |
| Sample_C8C_bin.23  | 81.44            | 1.51              | 82                | 41.5           | Clostridiales       | 41.5            | 2.37              |
| Sample_T5A_bin.13  | 99.40            | 0.59              | 76                | 59.4           | Deltaproteobacteria | 59.4            | 4.34              |
| Sample_C8C_bin.21  | 98.65            | 0.00              | 182               | 44.1           | Clostridiales       | 44.1            | 2.80              |
| Sample_C8A_bin.15  | 98.65            | 0.34              | 165               | 36.2           | Clostridiales       | 36.2            | 3.05              |
| Sample_C8A_bin.14  | 90.49            | 0.29              | 260               | 61             | Clostridiales       | 61              | 1.72              |

|                    |       |      |     |      |                    |      |      |
|--------------------|-------|------|-----|------|--------------------|------|------|
| Sample_C8A_bin.17  | 99.05 | 1.27 | 128 | 31.3 | Firmicutes         | 31.3 | 2.40 |
| Sample_C8A_bin.10  | 93.33 | 0.67 | 53  | 36.1 | Clostridiales      | 36.1 | 2.42 |
| Sample_C8A_bin.13  | 81.30 | 3.48 | 180 | 42.6 | Bacteria           | 42.6 | 4.55 |
| Sample_C8A_bin.12  | 95.99 | 0.47 | 820 | 44.3 | Bacteroidales      | 44.3 | 3.25 |
| Sample_T6B_bin.40  | 92.40 | 4.11 | 316 | 44.8 | Clostridiales      | 44.8 | 2.62 |
| Sample_C10B_bin.1  | 95.95 | 2.53 | 28  | 44.2 | Clostridiales      | 44.2 | 3.13 |
| Sample_C8A_bin.19  | 87.44 | 2.04 | 452 | 48.5 | Proteobacteria     | 48.5 | 2.24 |
| Sample_T2B_bin.22  | 98.31 | 1.69 | 81  | 45.6 | Prevotella         | 45.6 | 3.72 |
| Sample_T2B_bin.23  | 99.25 | 0.23 | 204 | 45.6 | Bacteroidales      | 45.6 | 3.51 |
| Sample_T2B_bin.21  | 96.97 | 0.00 | 100 | 53.1 | Clostridiales      | 53.1 | 1.99 |
| Sample_T2B_bin.26  | 93.53 | 0.00 | 14  | 26.6 | Bacteria           | 26.6 | 1.15 |
| Sample_T2B_bin.27  | 96.36 | 1.79 | 58  | 33.5 | Bacteria           | 33.5 | 2.26 |
| Sample_T2B_bin.24  | 92.26 | 1.34 | 342 | 33.8 | Clostridiales      | 33.8 | 1.88 |
| Sample_T2B_bin.28  | 85.90 | 0.00 | 23  | 44.5 | Clostridiales      | 44.5 | 2.33 |
| Sample_T10A_bin.29 | 83.89 | 0.67 | 28  | 59.9 | Clostridiales      | 59.9 | 1.77 |
| Sample_T10A_bin.28 | 97.14 | 0.98 | 45  | 46.5 | Bacteroidales      | 46.5 | 4.13 |
| Sample_T15A_bin.7  | 99.11 | 0.00 | 50  | 41.8 | Lachnospiraceae    | 41.8 | 2.60 |
| Sample_T10A_bin.23 | 94.72 | 0.49 | 321 | 43.5 | Bacteroidales      | 43.5 | 2.85 |
| Sample_T10A_bin.21 | 83.49 | 1.17 | 391 | 37.8 | Bacteria           | 37.8 | 2.31 |
| Sample_T10A_bin.20 | 99.96 | 0.58 | 390 | 50.7 | Enterobacteriaceae | 50.7 | 4.61 |
| Sample_T10A_bin.27 | 91.46 | 0.04 | 301 | 29.1 | Bacteria           | 29.1 | 2.51 |
| Sample_T10A_bin.26 | 81.57 | 0.48 | 27  | 58.6 | Bacteroidetes      | 58.6 | 2.85 |
| Sample_T10A_bin.25 | 97.20 | 0.00 | 115 | 51.5 | Clostridiales      | 51.5 | 2.05 |
| Sample_T11B_bin.15 | 89.24 | 0.77 | 666 | 45.4 | Bacteroidales      | 45.4 | 4.04 |
| Sample_T8B_bin.46  | 98.73 | 0.63 | 78  | 44.8 | Clostridiales      | 44.8 | 3.08 |
| Sample_T8B_bin.47  | 98.00 | 0.84 | 176 | 35.8 | Clostridiales      | 35.8 | 2.70 |
| Sample_T7B_bin.2   | 80.28 | 0.79 | 202 | 59.4 | Clostridiales      | 59.4 | 2.14 |
| Sample_T7B_bin.5   | 98.65 | 0.06 | 34  | 37.8 | Clostridiales      | 37.8 | 2.04 |
| Sample_T8B_bin.40  | 92.40 | 0.70 | 269 | 47.5 | Clostridiales      | 47.5 | 1.49 |
| Sample_T7B_bin.7   | 96.97 | 0.00 | 168 | 49.7 | Clostridiales      | 49.7 | 2.79 |
| Sample_T7B_bin.9   | 98.73 | 0.02 | 111 | 48.5 | Firmicutes         | 48.5 | 2.04 |
| Sample_T13C_bin.19 | 84.92 | 4.50 | 118 | 57.7 | Clostridiales      | 57.7 | 2.39 |
| Sample_T13C_bin.18 | 95.22 | 2.05 | 77  | 59.5 | Bifidobacteriaceae | 59.5 | 2.08 |
| Sample_T13C_bin.13 | 94.52 | 0.74 | 105 | 60.4 | Bacteroidetes      | 60.4 | 2.42 |
| Sample_T13C_bin.12 | 97.31 | 0.00 | 90  | 46.1 | Clostridiales      | 46.1 | 2.35 |
| Sample_T13C_bin.11 | 88.81 | 0.41 | 108 | 45.2 | Clostridiales      | 45.2 | 2.56 |
| Sample_T13C_bin.10 | 97.31 | 1.01 | 243 | 52.2 | Clostridiales      | 52.2 | 2.13 |
| Sample_T13C_bin.17 | 93.28 | 0.42 | 118 | 40.5 | Bacteroidales      | 40.5 | 2.98 |
| Sample_T13C_bin.16 | 98.02 | 1.88 | 51  | 47   | Proteobacteria     | 47   | 1.80 |

|                    |       |      |     |      |                    |      |      |
|--------------------|-------|------|-----|------|--------------------|------|------|
| Sample_T13C_bin.15 | 97.96 | 0.37 | 52  | 49.6 | Bacteroidales      | 49.6 | 2.70 |
| Sample_T13C_bin.14 | 97.97 | 2.11 | 146 | 46.8 | Lachnospiraceae    | 46.8 | 3.35 |
| Sample_T5B_bin.43  | 92.59 | 0.09 | 85  | 44.5 | Bacteroidales      | 44.5 | 3.04 |
| Sample_T5B_bin.42  | 99.05 | 0.00 | 79  | 48.9 | Clostridiales      | 48.9 | 2.55 |
| Sample_T5B_bin.40  | 97.76 | 1.36 | 61  | 32.9 | Clostridiales      | 32.9 | 2.91 |
| Sample_T16B_bin.13 | 89.45 | 2.71 | 76  | 47   | Lachnospiraceae    | 47   | 2.57 |
| Sample_T6A_bin.28  | 93.64 | 4.46 | 189 | 46.9 | Lachnospiraceae    | 46.9 | 3.08 |
| Sample_T3A_bin.36  | 99.38 | 1.50 | 37  | 43.7 | Selenomonadales    | 43.7 | 2.36 |
| Sample_T2C_bin.3   | 81.87 | 0.00 | 234 | 44.5 | Clostridiales      | 44.5 | 2.14 |
| Sample_T6A_bin.22  | 92.12 | 1.65 | 36  | 41.7 | Lachnospiraceae    | 41.7 | 3.10 |
| Sample_C2A_bin.20  | 99.03 | 1.93 | 80  | 45.9 | Lachnospiraceae    | 45.9 | 3.33 |
| Sample_T14C_bin.27 | 98.63 | 0.68 | 247 | 56.2 | Clostridiales      | 56.2 | 2.53 |
| Sample_T2C_bin.7   | 82.85 | 1.68 | 302 | 59.7 | Clostridiales      | 59.7 | 1.95 |
| Sample_T6A_bin.25  | 96.37 | 0.68 | 260 | 56.4 | Clostridiales      | 56.4 | 2.37 |
| Sample_C1C_bin.40  | 87.12 | 1.01 | 296 | 37.1 | Clostridiales      | 37.1 | 2.51 |
| Sample_T12A_bin.58 | 84.34 | 1.34 | 292 | 56.1 | Clostridiales      | 56.1 | 2.92 |
| Sample_C1C_bin.43  | 99.32 | 1.01 | 38  | 40.7 | Clostridiales      | 40.7 | 2.08 |
| Sample_T12A_bin.59 | 90.69 | 0.96 | 34  | 59.2 | Bacteroidetes      | 59.2 | 2.68 |
| Sample_C3C_bin.14  | 91.94 | 2.11 | 28  | 45.7 | Prevotella         | 45.7 | 2.86 |
| Sample_C3C_bin.15  | 97.86 | 0.73 | 28  | 37.7 | Clostridiales      | 37.7 | 2.44 |
| Sample_C3C_bin.16  | 98.24 | 0.00 | 77  | 41.8 | Lachnospiraceae    | 41.8 | 2.52 |
| Sample_C5A_bin.66  | 99.42 | 0.00 | 60  | 45   | Bacteroidales      | 45   | 4.72 |
| Sample_C3C_bin.10  | 94.29 | 3.36 | 121 | 60.8 | Clostridiales      | 60.8 | 2.20 |
| Sample_C3C_bin.11  | 97.58 | 1.95 | 32  | 46.7 | Lachnospiraceae    | 46.7 | 2.96 |
| Sample_C3C_bin.12  | 99.98 | 1.70 | 264 | 43.6 | Selenomonadales    | 43.6 | 2.58 |
| Sample_C3C_bin.13  | 84.85 | 0.11 | 126 | 33.2 | Clostridiales      | 33.2 | 2.21 |
| Sample_C3C_bin.18  | 94.60 | 4.11 | 69  | 41.1 | Lachnospiraceae    | 41.1 | 3.10 |
| Sample_C3C_bin.19  | 94.60 | 0.34 | 99  | 41.9 | Clostridiales      | 41.9 | 2.66 |
| Sample_C1C_bin.44  | 92.59 | 1.34 | 216 | 49.4 | Clostridiales      | 49.4 | 1.93 |
| Sample_C6B_bin.37  | 90.60 | 0.78 | 48  | 62.5 | Clostridiales      | 62.5 | 1.70 |
| Sample_C6B_bin.33  | 98.22 | 1.45 | 105 | 41.5 | Lachnospiraceae    | 41.5 | 2.82 |
| Sample_T16B_bin.1  | 90.93 | 4.03 | 193 | 37.2 | Clostridiales      | 37.2 | 2.26 |
| Sample_T16B_bin.3  | 95.30 | 0.00 | 45  | 38.7 | Clostridiales      | 38.7 | 2.69 |
| Sample_T16B_bin.2  | 85.40 | 0.66 | 20  | 41.9 | Clostridiales      | 41.9 | 2.85 |
| Sample_T16B_bin.8  | 99.66 | 0.07 | 71  | 50.9 | Enterobacteriaceae | 50.9 | 4.51 |
| Sample_C6A_bin.6   | 98.59 | 0.68 | 231 | 56.2 | Clostridiales      | 56.2 | 2.55 |
| Sample_C6A_bin.5   | 87.63 | 1.21 | 166 | 47.7 | Lachnospiraceae    | 47.7 | 2.44 |
| Sample_C6A_bin.2   | 81.73 | 1.74 | 110 | 45.9 | Bacteroidales      | 45.9 | 3.37 |
| Sample_C6A_bin.1   | 90.91 | 1.23 | 184 | 59.2 | Bacteroidetes      | 59.2 | 2.79 |

|                    |        |      |     |      |                    |      |      |
|--------------------|--------|------|-----|------|--------------------|------|------|
| Sample_C12B_bin.28 | 96.90  | 1.65 | 142 | 33.3 | Bacteria           | 33.3 | 2.57 |
| Sample_C12B_bin.27 | 88.25  | 1.74 | 206 | 60.3 | Clostridiales      | 60.3 | 1.90 |
| Sample_C12B_bin.26 | 98.65  | 0.00 | 21  | 38   | Clostridiales      | 38   | 1.91 |
| Sample_C12B_bin.25 | 100.00 | 0.81 | 32  | 59.8 | Actinobacteria     | 59.8 | 2.22 |
| Sample_C12B_bin.24 | 99.32  | 0.00 | 17  | 41.3 | Clostridiales      | 41.3 | 2.66 |
| Sample_C12B_bin.23 | 96.99  | 4.43 | 130 | 41.9 | Bacteroidales      | 41.9 | 4.68 |
| Sample_C12B_bin.22 | 99.21  | 0.97 | 50  | 43.3 | Lachnospiraceae    | 43.3 | 3.10 |
| Sample_C12B_bin.21 | 93.95  | 1.45 | 132 | 46.6 | Clostridiales      | 46.6 | 2.51 |
| Sample_C12B_bin.20 | 98.07  | 1.76 | 48  | 54.5 | Bacteroidetes      | 54.5 | 2.36 |
| Sample_C1A_bin.18  | 82.44  | 3.92 | 378 | 60.3 | Bifidobacteriaceae | 60.3 | 1.87 |
| Sample_C1A_bin.14  | 89.73  | 2.66 | 153 | 46.8 | Bacteroidales      | 46.8 | 4.49 |
| Sample_T3B_bin.8   | 92.92  | 3.87 | 609 | 42.1 | Bacteria           | 42.1 | 3.77 |
| Sample_C1A_bin.16  | 97.98  | 0.00 | 199 | 50   | Clostridiales      | 50   | 2.82 |
| Sample_C1A_bin.17  | 84.52  | 0.82 | 34  | 43.6 | Lachnospiraceae    | 43.6 | 2.34 |
| Sample_C1A_bin.10  | 85.22  | 2.17 | 66  | 45.1 | Lachnospiraceae    | 45.1 | 2.37 |
| Sample_C1A_bin.11  | 99.98  | 1.50 | 172 | 43.8 | Selenomonadales    | 43.8 | 2.31 |
| Sample_T3B_bin.9   | 100.00 | 0.00 | 123 | 55.2 | Proteobacteria     | 55.2 | 2.86 |
| Sample_T5A_bin.16  | 98.97  | 0.00 | 57  | 47.1 | Clostridiales      | 47.1 | 3.02 |
| Sample_T5A_bin.11  | 93.87  | 0.80 | 24  | 41.4 | Bacteroidales      | 41.4 | 4.57 |
| Sample_T2A_bin.60  | 96.26  | 1.05 | 138 | 46.5 | Bacteroidales      | 46.5 | 4.35 |
| Sample_T5A_bin.10  | 98.24  | 0.00 | 59  | 43.4 | Lachnospiraceae    | 43.4 | 2.63 |
| Sample_T18B_bin.22 | 98.85  | 2.75 | 239 | 41.7 | Bacteroides        | 41.7 | 6.75 |
| Sample_T18B_bin.23 | 87.24  | 1.87 | 107 | 44.3 | Bacteroidales      | 44.3 | 3.12 |
| Sample_T7A_bin.8   | 92.76  | 0.00 | 45  | 37.4 | Clostridiales      | 37.4 | 2.63 |
| Sample_T18B_bin.26 | 94.33  | 4.02 | 274 | 56.5 | Clostridiales      | 56.5 | 2.34 |
| Sample_T18B_bin.24 | 93.47  | 0.53 | 428 | 46.3 | Bacteroidales      | 46.3 | 2.88 |
| Sample_T18B_bin.25 | 91.05  | 2.53 | 399 | 41   | Clostridiales      | 41   | 3.15 |
| Sample_T18B_bin.28 | 95.30  | 0.00 | 35  | 49.4 | Clostridiales      | 49.4 | 2.28 |
| Sample_T18B_bin.29 | 99.19  | 0.00 | 110 | 63.3 | Actinobacteria     | 63.3 | 2.84 |
| Sample_C11A_bin.21 | 91.33  | 3.16 | 227 | 44   | Clostridiales      | 44   | 3.00 |
| Sample_C11A_bin.20 | 91.61  | 0.00 | 85  | 41.6 | Lachnospiraceae    | 41.6 | 2.80 |
| Sample_C11A_bin.23 | 97.31  | 0.00 | 92  | 46.4 | Clostridiales      | 46.4 | 2.44 |
| Sample_C11A_bin.22 | 92.14  | 4.08 | 112 | 56   | Clostridiales      | 56   | 3.24 |
| Sample_C11A_bin.25 | 98.32  | 0.34 | 60  | 38.6 | Clostridiales      | 38.6 | 2.09 |
| Sample_C11A_bin.24 | 91.69  | 3.16 | 62  | 42.2 | Bacteroidales      | 42.2 | 3.24 |
| Sample_C11A_bin.26 | 99.51  | 0.96 | 30  | 54.3 | Bacteroidetes      | 54.3 | 2.17 |
| Sample_C11A_bin.29 | 99.32  | 1.01 | 53  | 40.9 | Clostridiales      | 40.9 | 2.12 |
| Sample_C11A_bin.28 | 97.10  | 0.36 | 65  | 42.8 | Lachnospiraceae    | 42.8 | 3.54 |
| Sample_T3B_bin.2   | 89.93  | 0.67 | 290 | 61   | Clostridiales      | 61   | 2.16 |



|                    |        |      |     |      |                    |      |      |
|--------------------|--------|------|-----|------|--------------------|------|------|
| Sample_T7A_bin.2   | 91.66  | 0.24 | 46  | 60   | Bacteroidetes      | 60   | 2.42 |
| Sample_T3B_bin.3   | 93.95  | 0.67 | 59  | 34.1 | Clostridiales      | 34.1 | 2.52 |
| Sample_T7A_bin.7   | 92.13  | 1.85 | 24  | 27.1 | Bacteria           | 27.1 | 1.49 |
| Sample_T12A_bin.31 | 97.09  | 0.00 | 38  | 44.6 | Clostridiales      | 44.6 | 2.25 |
| Sample_T7A_bin.4   | 98.10  | 1.58 | 94  | 41   | Clostridiales      | 41   | 3.59 |
| Sample_T15C_bin.19 | 99.51  | 0.00 | 79  | 41.5 | Lachnospiraceae    | 41.5 | 3.05 |
| Sample_C6B_bin.49  | 95.97  | 0.00 | 34  | 58.5 | Clostridiales      | 58.5 | 2.07 |
| Sample_T5C_bin.18  | 91.60  | 0.38 | 83  | 42.1 | Bacteroidales      | 42.1 | 3.85 |
| Sample_T5C_bin.13  | 97.55  | 1.28 | 271 | 58.3 | Clostridiales      | 58.3 | 2.84 |
| Sample_T5C_bin.11  | 90.19  | 1.21 | 267 | 43.5 | Lachnospiraceae    | 43.5 | 2.83 |
| Sample_T5C_bin.10  | 90.93  | 0.69 | 144 | 61.9 | Clostridiales      | 61.9 | 1.93 |
| Sample_T5C_bin.17  | 95.69  | 0.00 | 73  | 47.2 | Bacteria           | 47.2 | 1.72 |
| Sample_T5C_bin.16  | 97.98  | 0.00 | 47  | 37.8 | Clostridiales      | 37.8 | 2.07 |
| Sample_T5C_bin.14  | 90.93  | 0.67 | 433 | 37.6 | Clostridiales      | 37.6 | 2.29 |
| Sample_T15C_bin.14 | 83.14  | 3.29 | 218 | 60   | Clostridiales      | 60   | 1.71 |
| Sample_T15C_bin.17 | 97.59  | 1.92 | 27  | 54.5 | Bacteroidetes      | 54.5 | 2.07 |
| Sample_C1B_bin.24  | 96.20  | 1.58 | 251 | 40.9 | Clostridiales      | 40.9 | 3.63 |
| Sample_C1B_bin.25  | 98.25  | 1.90 | 86  | 44.5 | Clostridiales      | 44.5 | 2.62 |
| Sample_C1B_bin.26  | 98.26  | 0.38 | 95  | 45   | Bacteroidales      | 45   | 4.64 |
| Sample_C1B_bin.21  | 99.32  | 3.36 | 29  | 40.7 | Clostridiales      | 40.7 | 2.14 |
| Sample_C1B_bin.22  | 92.69  | 4.49 | 28  | 26.2 | Bacteria           | 26.2 | 1.31 |
| Sample_C1B_bin.23  | 100.00 | 0.23 | 130 | 56.3 | Bifidobacteriaceae | 56.3 | 2.22 |
| Sample_T15C_bin.11 | 97.31  | 0.06 | 49  | 58.4 | Clostridiales      | 58.4 | 2.37 |
| Sample_C3C_bin.5   | 84.88  | 0.89 | 140 | 59   | Bacteria           | 59   | 3.09 |
| Sample_C14A_bin.48 | 94.73  | 0.67 | 91  | 61.1 | Clostridiales      | 61.1 | 2.39 |
| Sample_C14A_bin.49 | 95.36  | 1.20 | 76  | 60.3 | Bacteroidetes      | 60.3 | 2.54 |
| Sample_C14A_bin.46 | 92.59  | 1.45 | 142 | 47   | Lachnospiraceae    | 47   | 3.12 |
| Sample_C14A_bin.47 | 97.38  | 1.62 | 74  | 59.3 | Bifidobacteriaceae | 59.3 | 2.16 |
| Sample_C14A_bin.44 | 87.75  | 2.50 | 193 | 62.3 | Clostridiales      | 62.3 | 1.49 |
| Sample_C14A_bin.42 | 81.31  | 0.49 | 170 | 27   | Clostridiales      | 27   | 2.18 |
| Sample_C14A_bin.40 | 98.73  | 0.02 | 104 | 48.3 | Firmicutes         | 48.3 | 2.11 |
| Sample_C14A_bin.41 | 97.46  | 0.81 | 82  | 44.6 | Clostridiales      | 44.6 | 3.06 |
| Sample_T14A_bin.4  | 93.28  | 1.34 | 23  | 57   | Clostridiales      | 57   | 3.36 |
| Sample_T14A_bin.5  | 95.19  | 0.72 | 54  | 59.3 | Bacteroidetes      | 59.3 | 2.65 |
| Sample_C8C_bin.11  | 95.19  | 0.62 | 61  | 40.8 | Bacteroidales      | 40.8 | 3.25 |
| Sample_C8C_bin.10  | 93.79  | 0.23 | 85  | 57   | Bifidobacteriaceae | 57   | 2.01 |
| Sample_C8C_bin.17  | 93.17  | 3.13 | 248 | 38.4 | Clostridiales      | 38.4 | 2.23 |
| Sample_C8C_bin.16  | 97.84  | 0.00 | 43  | 51   | Bacteria           | 51   | 1.93 |
| Sample_C8C_bin.15  | 94.84  | 1.63 | 247 | 40.9 | Clostridiales      | 40.9 | 2.30 |

|                    |       |      |     |      |                     |      |      |
|--------------------|-------|------|-----|------|---------------------|------|------|
| Sample_C8C_bin.14  | 94.37 | 1.84 | 449 | 43.4 | Bacteroidales       | 43.4 | 2.76 |
| Sample_T6B_bin.35  | 84.49 | 3.16 | 384 | 42.8 | Lachnospiraceae     | 42.8 | 2.68 |
| Sample_T10C_bin.3  | 84.35 | 0.67 | 411 | 37.3 | Clostridiales       | 37.3 | 2.25 |
| Sample_C8C_bin.18  | 94.94 | 1.75 | 138 | 45.9 | Lachnospiraceae     | 45.9 | 2.79 |
| Sample_T10C_bin.6  | 99.21 | 1.76 | 46  | 43.2 | Lachnospiraceae     | 43.2 | 3.13 |
| Sample_T10C_bin.7  | 96.71 | 0.14 | 66  | 46   | Bacteroidales       | 46   | 3.26 |
| Sample_T6B_bin.33  | 95.63 | 1.36 | 106 | 37.3 | Clostridiales       | 37.3 | 2.28 |
| Sample_T10C_bin.5  | 98.65 | 0.00 | 41  | 41.9 | Clostridiales       | 41.9 | 2.67 |
| Sample_C9A_bin.14  | 97.58 | 0.60 | 56  | 42.7 | Lachnospiraceae     | 42.7 | 3.53 |
| Sample_C9A_bin.15  | 96.61 | 1.93 | 52  | 47   | Lachnospiraceae     | 47   | 3.06 |
| Sample_C1C_bin.3   | 97.31 | 2.01 | 60  | 53   | Clostridiales       | 53   | 2.28 |
| Sample_C9A_bin.16  | 95.94 | 0.96 | 35  | 59   | Bacteroidetes       | 59   | 2.80 |
| Sample_T2B_bin.17  | 99.07 | 1.27 | 134 | 31.4 | Firmicutes          | 31.4 | 2.40 |
| Sample_T2B_bin.16  | 93.90 | 0.89 | 228 | 59.3 | Clostridiales       | 59.3 | 1.99 |
| Sample_T2B_bin.15  | 88.03 | 0.85 | 27  | 32.7 | Bacteria            | 32.7 | 1.97 |
| Sample_T2B_bin.14  | 96.98 | 0.90 | 26  | 43.4 | Selenomonadales     | 43.4 | 2.47 |
| Sample_T2B_bin.13  | 85.94 | 1.27 | 31  | 45.3 | Clostridiales       | 45.3 | 2.06 |
| Sample_C6B_bin.35  | 99.32 | 1.01 | 36  | 40.5 | Clostridiales       | 40.5 | 2.28 |
| Sample_T2B_bin.11  | 97.98 | 0.00 | 163 | 33.1 | Clostridiales       | 33.1 | 2.51 |
| Sample_T7B_bin.16  | 98.65 | 0.00 | 19  | 44.3 | Clostridiales       | 44.3 | 2.68 |
| Sample_T2B_bin.19  | 92.69 | 0.39 | 178 | 60.5 | Bifidobacteriaceae  | 60.5 | 1.81 |
| Sample_C12C_bin.48 | 95.63 | 4.87 | 180 | 59.4 | Clostridiales       | 59.4 | 1.86 |
| Sample_C12C_bin.49 | 97.21 | 1.34 | 81  | 36   | Clostridiales       | 36   | 2.56 |
| Sample_C9A_bin.12  | 92.61 | 1.58 | 129 | 46.7 | Bacteroidales       | 46.7 | 4.09 |
| Sample_C12C_bin.43 | 91.28 | 1.27 | 88  | 42.1 | Lachnospiraceae     | 42.1 | 2.15 |
| Sample_C12C_bin.40 | 98.63 | 0.00 | 255 | 43.1 | Clostridiales       | 43.1 | 2.53 |
| Sample_C9A_bin.13  | 94.92 | 0.00 | 53  | 44.4 | Clostridiales       | 44.4 | 2.62 |
| Sample_C12C_bin.47 | 85.67 | 0.44 | 92  | 46.2 | Bacteroidales       | 46.2 | 2.78 |
| Sample_C12C_bin.44 | 98.07 | 1.03 | 4   | 45.2 | Bacteroidales       | 45.2 | 4.01 |
| Sample_T8C_bin.18  | 96.59 | 0.86 | 71  | 63.6 | Clostridiales       | 63.6 | 2.33 |
| Sample_C6B_bin.36  | 87.08 | 2.24 | 122 | 58.9 | Clostridiales       | 58.9 | 1.99 |
| Sample_T8C_bin.12  | 95.78 | 0.51 | 369 | 59.4 | Bacteroidetes       | 59.4 | 2.76 |
| Sample_T8C_bin.10  | 94.96 | 1.34 | 31  | 60.3 | Clostridiales       | 60.3 | 2.55 |
| Sample_T8C_bin.16  | 92.13 | 0.90 | 91  | 42   | Bacteroides         | 42   | 4.48 |
| Sample_T8C_bin.17  | 99.40 | 0.00 | 76  | 61.1 | Deltaproteobacteria | 61.1 | 3.59 |
| Sample_T8C_bin.15  | 98.38 | 1.08 | 89  | 53.1 | Clostridia          | 53.1 | 2.06 |
| Sample_T17B_bin.6  | 95.38 | 0.79 | 66  | 44   | Clostridiales       | 44   | 3.57 |
| Sample_T17B_bin.7  | 91.42 | 0.63 | 31  | 46.9 | Clostridiales       | 46.9 | 2.90 |
| Sample_T17B_bin.4  | 98.83 | 1.50 | 162 | 44   | Selenomonadales     | 44   | 2.26 |

|                    |        |      |     |      |                    |      |      |
|--------------------|--------|------|-----|------|--------------------|------|------|
| Sample_T17B_bin.5  | 97.53  | 0.00 | 65  | 38.6 | Clostridiales      | 38.6 | 2.54 |
| Sample_T17B_bin.2  | 99.55  | 0.00 | 35  | 60.4 | Bifidobacteriaceae | 60.4 | 1.94 |
| Sample_T17B_bin.3  | 97.01  | 0.19 | 48  | 40.6 | Bacteroidales      | 40.6 | 3.66 |
| Sample_T4C_bin.15  | 92.69  | 1.19 | 61  | 60.7 | Clostridiales      | 60.7 | 2.17 |
| Sample_T17B_bin.1  | 99.60  | 0.00 | 109 | 38.6 | Selenomonadales    | 38.6 | 2.10 |
| Sample_T17B_bin.8  | 91.61  | 0.16 | 297 | 44.3 | Clostridiales      | 44.3 | 2.55 |
| Sample_T17B_bin.9  | 97.75  | 0.30 | 89  | 57.7 | Enterobacteriaceae | 57.7 | 5.14 |
| Sample_C10A_bin.42 | 91.12  | 1.61 | 117 | 59.6 | Actinobacteria     | 59.6 | 2.31 |
| Sample_C10A_bin.43 | 92.41  | 4.13 | 64  | 60.4 | Bifidobacteriaceae | 60.4 | 2.05 |
| Sample_C10A_bin.40 | 89.43  | 1.20 | 44  | 41.9 | Lachnospiraceae    | 41.9 | 1.97 |
| Sample_T7C_bin.2   | 96.20  | 1.27 | 44  | 44.3 | Clostridiales      | 44.3 | 2.91 |
| Sample_C10A_bin.46 | 90.93  | 2.42 | 208 | 47.3 | Bacteroidales      | 47.3 | 3.62 |
| Sample_T7C_bin.4   | 98.65  | 0.00 | 21  | 44.3 | Clostridiales      | 44.3 | 2.65 |
| Sample_T7C_bin.7   | 91.79  | 0.00 | 98  | 40.5 | Bacteroidales      | 40.5 | 2.91 |
| Sample_T15A_bin.18 | 97.11  | 0.96 | 26  | 54.7 | Bacteroidetes      | 54.7 | 2.05 |
| Sample_T15A_bin.17 | 94.85  | 3.10 | 90  | 44.7 | Bacteroidales      | 44.7 | 3.63 |
| Sample_T15A_bin.16 | 94.63  | 0.60 | 52  | 44.8 | Lachnospiraceae    | 44.8 | 2.68 |
| Sample_C10A_bin.48 | 87.44  | 3.24 | 294 | 56.8 | Clostridiales      | 56.8 | 1.99 |
| Sample_T15A_bin.14 | 85.73  | 0.67 | 31  | 60   | Clostridiales      | 60   | 1.92 |
| Sample_T15A_bin.13 | 98.65  | 0.34 | 64  | 39   | Clostridiales      | 39   | 2.36 |
| Sample_T15A_bin.12 | 99.03  | 2.13 | 79  | 41.7 | Lachnospiraceae    | 41.7 | 3.50 |
| Sample_T15A_bin.11 | 84.61  | 0.68 | 114 | 58.9 | Clostridiales      | 58.9 | 1.75 |
| Sample_T4B_bin.33  | 98.07  | 0.00 | 76  | 46.6 | Bacteroidales      | 46.6 | 4.12 |
| Sample_T4B_bin.32  | 81.91  | 3.97 | 305 | 60   | Clostridiales      | 60   | 1.80 |
| Sample_T4B_bin.36  | 97.97  | 2.03 | 68  | 45.4 | Prevotella         | 45.4 | 3.18 |
| Sample_T15A_bin.6  | 80.61  | 1.53 | 80  | 58.8 | Clostridiales      | 58.8 | 1.99 |
| Sample_T4B_bin.39  | 97.66  | 2.24 | 45  | 43.6 | Lachnospiraceae    | 43.6 | 2.82 |
| Sample_T15A_bin.4  | 98.63  | 0.00 | 66  | 42.7 | Clostridiales      | 42.7 | 2.82 |
| Sample_T15A_bin.3  | 85.94  | 1.27 | 115 | 48.8 | Clostridiales      | 48.8 | 2.49 |
| Sample_T1C_bin.10  | 98.73  | 0.02 | 285 | 48.4 | Firmicutes         | 48.4 | 2.11 |
| Sample_T12A_bin.61 | 89.93  | 1.68 | 94  | 59.3 | Clostridiales      | 59.3 | 2.15 |
| Sample_T12A_bin.60 | 86.14  | 0.96 | 84  | 60.7 | Bacteroidetes      | 60.7 | 2.30 |
| Sample_T11B_bin.44 | 88.11  | 0.48 | 55  | 59.5 | Bacteroidetes      | 59.5 | 2.39 |
| Sample_T11B_bin.41 | 97.98  | 1.98 | 62  | 61.5 | Clostridiales      | 61.5 | 3.59 |
| Sample_T11B_bin.43 | 81.35  | 1.70 | 64  | 38.5 | Clostridiales      | 38.5 | 2.34 |
| Sample_T11B_bin.42 | 95.60  | 1.49 | 306 | 46.3 | Bacteroidales      | 46.3 | 3.62 |
| Sample_C4A_bin.1   | 96.37  | 2.82 | 20  | 46.7 | Lachnospiraceae    | 46.7 | 3.06 |
| Sample_C10A_bin.20 | 100.00 | 0.11 | 18  | 29.5 | Bacteria           | 29.5 | 1.54 |
| Sample_C4A_bin.3   | 84.58  | 2.34 | 87  | 41.7 | Bacteroidales      | 41.7 | 3.94 |

|                    |        |      |     |      |                    |      |      |
|--------------------|--------|------|-----|------|--------------------|------|------|
| Sample_C4A_bin.2   | 100.00 | 1.50 | 81  | 43.8 | Selenomonadales    | 43.8 | 2.31 |
| Sample_C4A_bin.5   | 94.23  | 0.00 | 187 | 49.2 | Clostridiales      | 49.2 | 2.43 |
| Sample_T10B_bin.16 | 98.30  | 0.38 | 66  | 49.9 | Bacteroidales      | 49.9 | 2.66 |
| Sample_T10B_bin.15 | 95.94  | 1.69 | 59  | 45.2 | Prevotella         | 45.2 | 3.27 |
| Sample_C5A_bin.2   | 97.56  | 1.90 | 30  | 44.8 | Clostridiales      | 44.8 | 1.89 |
| Sample_C4A_bin.8   | 86.49  | 0.37 | 105 | 47.7 | Bacteroidales      | 47.7 | 3.44 |
| Sample_T10B_bin.19 | 99.32  | 0.67 | 20  | 41.2 | Clostridiales      | 41.2 | 2.61 |
| Sample_C5A_bin.1   | 93.70  | 1.39 | 25  | 57.4 | Clostridiales      | 57.4 | 2.14 |
| Sample_C5A_bin.6   | 99.36  | 0.63 | 38  | 44.5 | Clostridiales      | 44.5 | 2.71 |
| Sample_C10A_bin.22 | 91.58  | 0.17 | 187 | 59.3 | Clostridiales      | 59.3 | 2.51 |
| Sample_C5A_bin.4   | 97.31  | 0.00 | 194 | 50.1 | Clostridiales      | 50.1 | 2.79 |
| Sample_C5A_bin.5   | 94.92  | 0.00 | 518 | 44.9 | Lachnospiraceae    | 44.9 | 2.56 |
| Sample_T10B_bin.1  | 94.55  | 0.70 | 121 | 60.8 | Clostridiales      | 60.8 | 2.19 |
| Sample_C10A_bin.26 | 80.44  | 0.00 | 192 | 61.4 | Clostridiales      | 61.4 | 1.80 |
| Sample_C10C_bin.9  | 97.98  | 2.01 | 81  | 38.2 | Clostridiales      | 38.2 | 2.74 |
| Sample_C10C_bin.7  | 84.47  | 0.32 | 152 | 43   | Lachnospiraceae    | 43   | 1.62 |
| Sample_C10C_bin.5  | 88.19  | 1.40 | 159 | 58.9 | Clostridiales      | 58.9 | 1.81 |
| Sample_C10C_bin.4  | 97.98  | 0.67 | 33  | 36   | Clostridiales      | 36   | 2.66 |
| Sample_C10C_bin.3  | 82.22  | 3.63 | 91  | 60.2 | Bifidobacteriaceae | 60.2 | 1.77 |
| Sample_C10C_bin.2  | 96.46  | 0.58 | 54  | 43.5 | Lachnospiraceae    | 43.5 | 2.62 |
| Sample_C10C_bin.1  | 99.09  | 2.08 | 133 | 56.2 | Clostridiales      | 56.2 | 2.50 |
| Sample_C2C_bin.11  | 97.04  | 0.67 | 22  | 52.4 | Clostridiales      | 52.4 | 2.35 |
| Sample_T2B_bin.2   | 97.84  | 0.07 | 11  | 43.4 | Bacteria           | 43.4 | 3.32 |
| Sample_C2B_bin.53  | 97.31  | 0.00 | 173 | 37.8 | Clostridiales      | 37.8 | 1.88 |
| Sample_T8B_bin.43  | 99.30  | 1.17 | 472 | 57.8 | Clostridiales      | 57.8 | 3.16 |
| Sample_C2C_bin.17  | 98.65  | 0.67 | 52  | 37.5 | Clostridiales      | 37.5 | 2.34 |
| Sample_T8B_bin.41  | 97.19  | 1.03 | 123 | 54.7 | Clostridiales      | 54.7 | 2.58 |
| Sample_C2C_bin.19  | 82.88  | 0.17 | 64  | 61.3 | Clostridiales      | 61.3 | 1.93 |
| Sample_C11C_bin.41 | 99.15  | 4.22 | 55  | 44.7 | Prevotella         | 44.7 | 3.92 |
| Sample_C11C_bin.40 | 87.11  | 1.36 | 152 | 45.2 | Clostridiales      | 45.2 | 2.27 |
| Sample_T14A_bin.17 | 93.19  | 1.74 | 80  | 60.7 | Clostridiales      | 60.7 | 2.19 |
| Sample_T15A_bin.23 | 98.01  | 0.00 | 18  | 42.2 | Bacteria           | 42.2 | 4.34 |
| Sample_T11C_bin.51 | 91.53  | 1.27 | 242 | 49.1 | Clostridiales      | 49.1 | 2.44 |
| Sample_T11C_bin.50 | 93.96  | 1.04 | 35  | 43.9 | Lachnospiraceae    | 43.9 | 2.57 |
| Sample_T18B_bin.31 | 97.31  | 0.00 | 44  | 53   | Clostridiales      | 53   | 1.96 |
| Sample_T18B_bin.30 | 99.78  | 1.50 | 13  | 44.1 | Selenomonadales    | 44.1 | 2.23 |
| Sample_T18B_bin.33 | 92.97  | 1.54 | 54  | 55.3 | Bacteroidetes      | 55.3 | 2.04 |
| Sample_T18B_bin.32 | 97.31  | 0.34 | 112 | 36.3 | Clostridiales      | 36.3 | 2.55 |
| Sample_C3C_bin.42  | 96.64  | 0.00 | 242 | 53.3 | Clostridiales      | 53.3 | 1.95 |

|                    |        |      |     |      |                     |      |      |
|--------------------|--------|------|-----|------|---------------------|------|------|
| Sample_C11A_bin.14 | 95.53  | 0.19 | 105 | 48.3 | Bacteroidales       | 48.3 | 4.01 |
| Sample_C11A_bin.15 | 97.19  | 1.12 | 228 | 30.3 | Bacteria            | 30.3 | 2.02 |
| Sample_C11A_bin.16 | 98.13  | 0.62 | 67  | 62.5 | Proteobacteria      | 62.5 | 2.37 |
| Sample_C11A_bin.17 | 87.75  | 0.00 | 35  | 60.2 | Clostridiales       | 60.2 | 2.25 |
| Sample_C11A_bin.10 | 89.39  | 0.02 | 46  | 59.9 | Deltaproteobacteria | 59.9 | 3.46 |
| Sample_C11A_bin.11 | 95.30  | 0.00 | 50  | 45.9 | Clostridiales       | 45.9 | 2.94 |
| Sample_C11A_bin.12 | 97.98  | 1.01 | 42  | 44.5 | Clostridiales       | 44.5 | 1.93 |
| Sample_C11A_bin.13 | 98.70  | 1.30 | 38  | 49.6 | Bacteroidales       | 49.6 | 2.73 |
| Sample_C11A_bin.19 | 99.23  | 0.38 | 103 | 45.1 | Bacteroidales       | 45.1 | 4.55 |
| Sample_T2C_bin.17  | 97.46  | 0.63 | 70  | 44.1 | Clostridiales       | 44.1 | 3.37 |
| Sample_C6B_bin.28  | 98.95  | 1.17 | 99  | 58.1 | Clostridiales       | 58.1 | 2.94 |
| Sample_C5B_bin.20  | 93.14  | 0.12 | 63  | 46.4 | Bacteroidales       | 46.4 | 3.22 |
| Sample_T1B_bin.10  | 98.73  | 0.02 | 34  | 48.4 | Firmicutes          | 48.4 | 2.08 |
| Sample_C4C_bin.14  | 95.67  | 2.13 | 70  | 59.1 | Bacteroidetes       | 59.1 | 2.80 |
| Sample_T2C_bin.21  | 88.03  | 0.85 | 27  | 32.7 | Bacteria            | 32.7 | 1.96 |
| Sample_T2C_bin.20  | 99.03  | 2.40 | 25  | 54.5 | Bacteroidetes       | 54.5 | 2.32 |
| Sample_T2C_bin.23  | 98.65  | 0.00 | 180 | 34   | Clostridiales       | 34   | 2.02 |
| Sample_T2C_bin.22  | 99.32  | 0.00 | 57  | 40.9 | Clostridiales       | 40.9 | 2.69 |
| Sample_T2C_bin.25  | 93.82  | 0.00 | 67  | 26.8 | Bacteria            | 26.8 | 1.17 |
| Sample_T2C_bin.27  | 87.91  | 3.02 | 173 | 57.2 | Clostridiales       | 57.2 | 2.08 |
| Sample_T2C_bin.26  | 98.32  | 0.00 | 67  | 45   | Clostridiales       | 45   | 2.52 |
| Sample_T2C_bin.29  | 96.64  | 0.00 | 33  | 49.9 | Clostridiales       | 49.9 | 2.36 |
| Sample_T2C_bin.28  | 96.42  | 0.00 | 58  | 57.3 | Clostridiales       | 57.3 | 2.18 |
| Sample_C14A_bin.51 | 97.98  | 2.01 | 143 | 37.5 | Clostridiales       | 37.5 | 3.31 |
| Sample_C14A_bin.50 | 96.84  | 1.54 | 272 | 55   | Clostridiales       | 55   | 2.49 |
| Sample_C11C_bin.4  | 100.00 | 1.20 | 400 | 47   | Selenomonadales     | 47   | 2.26 |
| Sample_T6B_bin.28  | 95.14  | 1.90 | 49  | 47.7 | Clostridiales       | 47.7 | 3.13 |
| Sample_T6B_bin.29  | 97.16  | 0.00 | 38  | 49.9 | Bacteroidales       | 49.9 | 2.54 |
| Sample_C8A_bin.33  | 96.51  | 0.02 | 35  | 48.5 | Firmicutes          | 48.5 | 2.10 |
| Sample_C8A_bin.31  | 98.51  | 0.23 | 128 | 45.5 | Bacteroidales       | 45.5 | 3.31 |
| Sample_C8A_bin.30  | 95.32  | 0.12 | 91  | 41.9 | Lachnospiraceae     | 41.9 | 2.33 |
| Sample_T6B_bin.22  | 96.64  | 1.34 | 61  | 58.7 | Clostridiales       | 58.7 | 2.09 |
| Sample_T6B_bin.23  | 99.98  | 1.50 | 28  | 43.4 | Selenomonadales     | 43.4 | 2.42 |
| Sample_T6B_bin.20  | 97.42  | 1.01 | 170 | 56.4 | Clostridiales       | 56.4 | 2.72 |
| Sample_T6B_bin.21  | 99.05  | 0.00 | 75  | 29.8 | Bacteria            | 29.8 | 2.62 |
| Sample_T11B_bin.13 | 97.46  | 0.00 | 106 | 41.7 | Clostridiales       | 41.7 | 3.03 |
| Sample_C12C_bin.59 | 88.36  | 0.00 | 55  | 56.8 | Clostridiales       | 56.8 | 2.02 |
| Sample_C12C_bin.58 | 94.07  | 2.35 | 87  | 57   | Clostridiales       | 57   | 2.13 |
| Sample_T10A_bin.49 | 86.91  | 2.64 | 233 | 43.5 | Clostridiales       | 43.5 | 2.76 |

|                    |       |      |     |      |                    |      |      |
|--------------------|-------|------|-----|------|--------------------|------|------|
| Sample_C12C_bin.51 | 97.90 | 0.00 | 67  | 41.5 | Lachnospiraceae    | 41.5 | 2.62 |
| Sample_T10A_bin.44 | 81.81 | 0.67 | 51  | 37.6 | Clostridiales      | 37.6 | 2.18 |
| Sample_C12C_bin.53 | 91.96 | 3.69 | 73  | 57.5 | Clostridiales      | 57.5 | 2.30 |
| Sample_T10A_bin.46 | 97.30 | 1.05 | 343 | 45.3 | Bacteroidales      | 45.3 | 4.36 |
| Sample_T10A_bin.41 | 97.31 | 1.01 | 141 | 44.5 | Clostridiales      | 44.5 | 1.96 |
| Sample_T10A_bin.40 | 95.11 | 1.29 | 65  | 43.3 | Lachnospiraceae    | 43.3 | 2.70 |
| Sample_T10A_bin.43 | 91.87 | 0.96 | 368 | 60.9 | Firmicutes         | 60.9 | 2.71 |
| Sample_T10A_bin.42 | 95.91 | 0.00 | 319 | 58.7 | Clostridiales      | 58.7 | 3.02 |
| Sample_C13B_bin.9  | 99.80 | 1.35 | 101 | 43.9 | Selenomonadales    | 43.9 | 2.43 |
| Sample_T8C_bin.29  | 99.34 | 2.06 | 104 | 49.2 | Clostridiales      | 49.2 | 6.46 |
| Sample_T14B_bin.8  | 84.48 | 0.32 | 269 | 38.4 | Clostridiales      | 38.4 | 2.37 |
| Sample_T14B_bin.7  | 99.32 | 0.31 | 27  | 42.6 | Clostridiales      | 42.6 | 3.09 |
| Sample_T8C_bin.26  | 91.94 | 1.01 | 42  | 61.5 | Clostridiales      | 61.5 | 2.20 |
| Sample_T14B_bin.5  | 90.88 | 3.47 | 102 | 42.1 | Bacteroidales      | 42.1 | 3.46 |
| Sample_C13B_bin.8  | 97.46 | 0.00 | 146 | 41.5 | Clostridiales      | 41.5 | 3.59 |
| Sample_T8C_bin.23  | 92.61 | 3.02 | 108 | 60.8 | Clostridiales      | 60.8 | 2.39 |
| Sample_T12C_bin.32 | 80.38 | 2.68 | 96  | 58.4 | Bacteria           | 58.4 | 2.02 |
| Sample_T14B_bin.1  | 97.51 | 0.62 | 131 | 62.7 | Proteobacteria     | 62.7 | 2.24 |
| Sample_T8C_bin.20  | 96.49 | 0.00 | 468 | 41.8 | Lachnospiraceae    | 41.8 | 2.39 |
| Sample_C9A_bin.44  | 99.03 | 3.13 | 549 | 54.2 | Bacteroidetes      | 54.2 | 2.53 |
| Sample_C9A_bin.43  | 93.94 | 1.53 | 61  | 57.8 | Clostridiales      | 57.8 | 2.11 |
| Sample_C9A_bin.40  | 99.61 | 0.38 | 95  | 45   | Bacteroidales      | 45   | 4.11 |
| Sample_T13A_bin.8  | 99.35 | 0.48 | 39  | 41.6 | Lachnospiraceae    | 41.6 | 2.66 |
| Sample_T5A_bin.7   | 99.23 | 0.00 | 46  | 45.3 | Bacteroidales      | 45.3 | 4.15 |
| Sample_T5A_bin.6   | 94.87 | 0.84 | 238 | 43.9 | Clostridiales      | 43.9 | 2.69 |
| Sample_T5A_bin.1   | 99.25 | 0.00 | 102 | 49.2 | Clostridiales      | 49.2 | 5.95 |
| Sample_T5A_bin.3   | 95.80 | 0.63 | 111 | 43.2 | Clostridiales      | 43.2 | 3.05 |
| Sample_T13A_bin.1  | 92.98 | 0.75 | 86  | 44.2 | Bacteroidales      | 44.2 | 3.78 |
| Sample_T13A_bin.5  | 80.69 | 1.63 | 25  | 46.2 | Bacteroidales      | 46.2 | 2.52 |
| Sample_T13A_bin.4  | 95.14 | 0.67 | 195 | 54.1 | Clostridiales      | 54.1 | 1.78 |
| Sample_T13A_bin.7  | 82.90 | 0.30 | 318 | 56.8 | Selenomonadales    | 56.8 | 1.78 |
| Sample_T13A_bin.6  | 95.67 | 0.75 | 75  | 58.9 | Bacteroidetes      | 58.9 | 3.10 |
| Sample_C10A_bin.51 | 88.21 | 3.41 | 205 | 62.1 | Clostridiales      | 62.1 | 1.50 |
| Sample_C10A_bin.50 | 98.55 | 2.17 | 43  | 43.9 | Lachnospiraceae    | 43.9 | 2.76 |
| Sample_C10A_bin.52 | 96.67 | 1.01 | 206 | 45.5 | Prevotella         | 45.5 | 3.17 |
| Sample_C10A_bin.55 | 93.72 | 2.85 | 339 | 41   | Clostridiales      | 41   | 3.03 |
| Sample_C10A_bin.54 | 84.22 | 0.92 | 55  | 53.2 | Clostridiales      | 53.2 | 2.01 |
| Sample_C10A_bin.57 | 80.41 | 2.05 | 233 | 60   | Bifidobacteriaceae | 60   | 1.92 |
| Sample_C10A_bin.59 | 92.41 | 3.37 | 35  | 25.3 | Bacteria           | 25.3 | 1.47 |

|                    |       |      |     |      |                 |      |      |
|--------------------|-------|------|-----|------|-----------------|------|------|
| Sample_C10A_bin.58 | 93.38 | 0.99 | 29  | 59   | Bacteroidetes   | 59   | 2.79 |
| Sample_C11B_bin.52 | 96.34 | 0.74 | 70  | 47.6 | Bacteroidales   | 47.6 | 2.67 |
| Sample_T4B_bin.24  | 99.32 | 0.00 | 77  | 43.9 | Clostridiales   | 43.9 | 2.92 |
| Sample_T4B_bin.25  | 91.83 | 0.67 | 53  | 45.3 | Clostridiales   | 45.3 | 1.64 |
| Sample_T4B_bin.26  | 96.84 | 0.82 | 100 | 37.6 | Clostridiales   | 37.6 | 2.55 |
| Sample_T4B_bin.27  | 93.82 | 1.12 | 84  | 25.1 | Bacteria        | 25.1 | 1.67 |
| Sample_T4B_bin.21  | 98.76 | 0.04 | 25  | 56.8 | Clostridiales   | 56.8 | 2.33 |
| Sample_T10B_bin.2  | 98.65 | 0.67 | 212 | 33.2 | Clostridiales   | 33.2 | 2.22 |
| Sample_T4B_bin.28  | 93.55 | 0.22 | 209 | 33.2 | Clostridiales   | 33.2 | 2.40 |
| Sample_T4B_bin.29  | 97.95 | 0.70 | 213 | 56.2 | Clostridiales   | 56.2 | 2.44 |
| Sample_T18A_bin.8  | 95.50 | 1.90 | 213 | 41.1 | Lachnospiraceae | 41.1 | 3.45 |
| Sample_C3A_bin.48  | 96.98 | 0.00 | 49  | 43.4 | Bacteroidales   | 43.4 | 3.08 |
| Sample_T10B_bin.6  | 97.27 | 0.72 | 218 | 56.3 | Clostridiales   | 56.3 | 2.37 |
| Sample_T11B_bin.14 | 84.53 | 0.87 | 220 | 47.3 | Bacteroidales   | 47.3 | 3.35 |
| Sample_C4C_bin.9   | 98.65 | 0.00 | 35  | 36.4 | Clostridiales   | 36.4 | 1.99 |
| Sample_T12A_bin.57 | 94.63 | 2.01 | 68  | 45.9 | Clostridiales   | 45.9 | 2.24 |
| Sample_T12A_bin.50 | 92.61 | 0.67 | 180 | 40.9 | Clostridiales   | 40.9 | 2.21 |
| Sample_T12A_bin.51 | 92.95 | 0.76 | 555 | 44.2 | Clostridiales   | 44.2 | 2.35 |
| Sample_T12A_bin.52 | 93.96 | 1.95 | 102 | 45.6 | Bacteroidales   | 45.6 | 4.23 |
| Sample_T12A_bin.53 | 98.60 | 1.17 | 45  | 58.1 | Clostridiales   | 58.1 | 3.04 |
| Sample_C4C_bin.3   | 97.74 | 3.97 | 70  | 42.3 | Bacteroidales   | 42.3 | 6.01 |
| Sample_C4C_bin.2   | 86.38 | 2.05 | 178 | 42   | Bacteroides     | 42   | 3.97 |
| Sample_C4C_bin.7   | 83.85 | 4.03 | 261 | 55.8 | Clostridiales   | 55.8 | 2.11 |
| Sample_C4C_bin.6   | 85.35 | 3.78 | 113 | 59.1 | Clostridiales   | 59.1 | 1.99 |
| Sample_C2C_bin.2   | 98.10 | 0.02 | 60  | 48.5 | Firmicutes      | 48.5 | 2.13 |
| Sample_C2C_bin.4   | 87.83 | 0.07 | 34  | 61.1 | Proteobacteria  | 61.1 | 2.19 |
| Sample_C2C_bin.7   | 93.79 | 2.85 | 278 | 59.2 | Bacteroidetes   | 59.2 | 2.87 |
| Sample_C2C_bin.6   | 82.15 | 2.41 | 314 | 45.8 | Prevotella      | 45.8 | 2.57 |
| Sample_C2C_bin.9   | 99.19 | 0.00 | 123 | 54.8 | Clostridia      | 54.8 | 2.72 |
| Sample_C2C_bin.8   | 85.06 | 0.84 | 319 | 44.3 | Clostridiales   | 44.3 | 2.01 |
| Sample_T5B_bin.25  | 99.13 | 0.00 | 48  | 48.6 | Bacteroidales   | 48.6 | 3.55 |
| Sample_T5B_bin.24  | 94.81 | 0.00 | 159 | 55.4 | Clostridiales   | 55.4 | 2.27 |
| Sample_T7A_bin.9   | 97.96 | 0.00 | 50  | 41.8 | Clostridiales   | 41.8 | 2.72 |
| Sample_T5B_bin.26  | 88.32 | 0.68 | 61  | 43.3 | Bacteroidales   | 43.3 | 4.41 |
| Sample_T5B_bin.21  | 99.38 | 0.60 | 24  | 45.5 | Selenomonadales | 45.5 | 1.92 |
| Sample_T5B_bin.20  | 92.74 | 0.00 | 267 | 58.5 | Clostridiales   | 58.5 | 3.04 |
| Sample_T7A_bin.3   | 96.85 | 1.17 | 109 | 57.9 | Clostridiales   | 57.9 | 3.09 |
| Sample_C3A_bin.45  | 94.63 | 3.36 | 92  | 56.2 | Clostridiales   | 56.2 | 2.57 |
| Sample_T7A_bin.1   | 84.25 | 2.80 | 49  | 44.1 | Clostridiales   | 44.1 | 2.27 |

|                    |        |      |     |      |                 |      |      |
|--------------------|--------|------|-----|------|-----------------|------|------|
| Sample_T5B_bin.29  | 96.20  | 0.85 | 276 | 41.8 | Clostridiales   | 41.8 | 3.21 |
| Sample_T7A_bin.6   | 99.90  | 0.00 | 102 | 52.4 | Firmicutes      | 52.4 | 2.55 |
| Sample_T7A_bin.5   | 83.66  | 2.01 | 92  | 59.7 | Clostridiales   | 59.7 | 1.77 |
| Sample_C3A_bin.44  | 100.00 | 2.42 | 151 | 60   | Actinobacteria  | 60   | 2.14 |
| Sample_T14B_bin.48 | 97.76  | 1.34 | 79  | 57.3 | Clostridiales   | 57.3 | 2.21 |
| Sample_T15C_bin.15 | 95.51  | 1.76 | 48  | 43.6 | Lachnospiraceae | 43.6 | 2.78 |
| Sample_T14B_bin.45 | 94.62  | 1.27 | 138 | 49.3 | Clostridiales   | 49.3 | 2.25 |
| Sample_T14B_bin.46 | 89.59  | 0.17 | 105 | 40.6 | Clostridiales   | 40.6 | 2.44 |
| Sample_T14B_bin.40 | 93.06  | 0.34 | 160 | 36.3 | Clostridiales   | 36.3 | 1.89 |
| Sample_T14B_bin.41 | 91.36  | 0.77 | 253 | 48.7 | Lachnospiraceae | 48.7 | 2.73 |
| Sample_T14B_bin.42 | 95.76  | 0.96 | 60  | 60.5 | Bacteroidetes   | 60.5 | 2.54 |
| Sample_T12B_bin.7  | 84.07  | 1.38 | 90  | 40.6 | Bacteroidales   | 40.6 | 2.96 |
| Sample_C5A_bin.49  | 99.98  | 3.39 | 82  | 43.7 | Selenomonadales | 43.7 | 2.38 |
| Sample_C5A_bin.48  | 98.11  | 1.89 | 76  | 54.2 | Bacteroidales   | 54.2 | 2.48 |
| Sample_T15A_bin.9  | 83.10  | 0.00 | 36  | 46.3 | Bacteria        | 46.3 | 4.12 |
| Sample_C5A_bin.43  | 91.62  | 3.04 | 35  | 60.8 | Bacteroidetes   | 60.8 | 2.38 |
| Sample_C5A_bin.42  | 96.64  | 0.17 | 271 | 58.9 | Clostridiales   | 58.9 | 2.00 |
| Sample_C5A_bin.41  | 98.65  | 0.02 | 51  | 37.3 | Clostridiales   | 37.3 | 2.85 |
| Sample_C5A_bin.40  | 80.26  | 0.32 | 48  | 42   | Clostridiales   | 42   | 2.34 |
| Sample_C5A_bin.47  | 99.32  | 1.01 | 25  | 40.7 | Clostridiales   | 40.7 | 2.15 |
| Sample_T15A_bin.2  | 98.07  | 0.22 | 182 | 45.2 | Bacteroidales   | 45.2 | 3.95 |
| Sample_C5A_bin.45  | 83.48  | 2.04 | 76  | 59.4 | Clostridiales   | 59.4 | 1.88 |
| Sample_C5A_bin.44  | 99.32  | 0.34 | 192 | 36.5 | Clostridiales   | 36.5 | 2.13 |
| Sample_C12A_bin.7  | 98.65  | 0.34 | 44  | 38.7 | Clostridiales   | 38.7 | 2.11 |
| Sample_C12A_bin.4  | 98.60  | 1.17 | 121 | 57.6 | Clostridiales   | 57.6 | 3.11 |
| Sample_C12A_bin.3  | 99.32  | 0.00 | 331 | 41.4 | Clostridiales   | 41.4 | 2.57 |
| Sample_C12A_bin.2  | 86.86  | 2.87 | 113 | 58.3 | Clostridiales   | 58.3 | 1.77 |
| Sample_C12A_bin.1  | 98.63  | 0.00 | 307 | 42.8 | Clostridiales   | 42.8 | 2.64 |
| Sample_C2C_bin.41  | 99.51  | 2.34 | 18  | 54.3 | Bacteroidetes   | 54.3 | 2.30 |
| Sample_C12A_bin.9  | 97.85  | 1.34 | 164 | 38   | Clostridiales   | 38   | 3.71 |
| Sample_C3A_bin.34  | 88.25  | 3.36 | 59  | 59.5 | Clostridiales   | 59.5 | 2.07 |
| Sample_C6A_bin.13  | 97.98  | 0.00 | 59  | 52.1 | Clostridiales   | 52.1 | 2.42 |
| Sample_C9B_bin.29  | 96.16  | 0.85 | 135 | 57.2 | Clostridiales   | 57.2 | 2.62 |
| Sample_C6C_bin.15  | 97.82  | 0.48 | 44  | 41.5 | Lachnospiraceae | 41.5 | 2.71 |
| Sample_C6C_bin.14  | 87.75  | 0.86 | 270 | 44.4 | Clostridiales   | 44.4 | 2.52 |
| Sample_C6C_bin.17  | 98.55  | 0.96 | 58  | 54.8 | Bacteroidetes   | 54.8 | 2.17 |
| Sample_C6C_bin.16  | 96.14  | 0.40 | 169 | 45.5 | Bacteroidales   | 45.5 | 3.89 |
| Sample_C6C_bin.10  | 99.30  | 1.17 | 82  | 58.2 | Clostridiales   | 58.2 | 2.89 |
| Sample_C6C_bin.19  | 97.31  | 0.00 | 43  | 58.7 | Clostridiales   | 58.7 | 2.04 |



|                    |       |      |     |      |                 |      |      |
|--------------------|-------|------|-----|------|-----------------|------|------|
| Sample_C6A_bin.12  | 89.16 | 0.40 | 23  | 40.4 | Bacteroidales   | 40.4 | 2.75 |
| Sample_C13B_bin.6  | 95.53 | 0.67 | 106 | 51.5 | Clostridiales   | 51.5 | 2.12 |
| Sample_C13B_bin.4  | 86.78 | 0.89 | 223 | 59.3 | Clostridiales   | 59.3 | 1.77 |
| Sample_C13B_bin.3  | 96.43 | 1.49 | 659 | 48.7 | Bacteroidales   | 48.7 | 3.60 |
| Sample_C13B_bin.2  | 84.55 | 1.46 | 45  | 43.9 | Lachnospiraceae | 43.9 | 2.11 |
| Sample_C14A_bin.10 | 97.95 | 0.68 | 43  | 55.2 | Bacteria        | 55.2 | 2.82 |
| Sample_C1C_bin.16  | 96.37 | 1.08 | 277 | 56.2 | Clostridiales   | 56.2 | 2.48 |
| Sample_C1C_bin.17  | 83.98 | 0.79 | 129 | 42.1 | Lachnospiraceae | 42.1 | 2.45 |
| Sample_C1C_bin.14  | 92.15 | 2.38 | 108 | 59.4 | Clostridiales   | 59.4 | 2.12 |
| Sample_C1C_bin.12  | 84.60 | 0.63 | 54  | 43.7 | Proteobacteria  | 43.7 | 2.06 |
| Sample_C1C_bin.10  | 86.57 | 0.67 | 109 | 58.8 | Clostridiales   | 58.8 | 2.22 |
| Sample_C1C_bin.11  | 97.27 | 2.04 | 388 | 58.1 | Clostridiales   | 58.1 | 3.50 |
| Sample_C6B_bin.15  | 98.21 | 0.00 | 76  | 34.2 | Clostridiales   | 34.2 | 2.41 |
| Sample_C13A_bin.9  | 96.83 | 0.95 | 67  | 40.3 | Clostridiales   | 40.3 | 2.59 |
| Sample_C13A_bin.4  | 98.63 | 0.00 | 56  | 43.1 | Clostridiales   | 43.1 | 2.75 |
| Sample_C13A_bin.5  | 89.86 | 1.86 | 48  | 46.6 | Bacteroidales   | 46.6 | 3.66 |
| Sample_C13A_bin.6  | 99.10 | 0.00 | 116 | 55.3 | Clostridiales   | 55.3 | 3.24 |
| Sample_C13A_bin.7  | 98.99 | 0.65 | 40  | 44   | Clostridiales   | 44   | 3.26 |
| Sample_C13A_bin.1  | 80.31 | 1.68 | 49  | 48.3 | Clostridiales   | 48.3 | 1.70 |
| Sample_C13A_bin.3  | 89.65 | 0.67 | 63  | 33.5 | Clostridiales   | 33.5 | 1.99 |
| Sample_C14A_bin.17 | 94.07 | 0.34 | 147 | 57.4 | Clostridiales   | 57.4 | 2.16 |
| Sample_C14A_bin.16 | 91.79 | 0.00 | 220 | 46.6 | Clostridiales   | 46.6 | 2.76 |
| Sample_C14A_bin.19 | 86.31 | 3.79 | 432 | 44.9 | Bacteroidales   | 44.9 | 2.74 |
| Sample_T5C_bin.8   | 95.97 | 0.00 | 52  | 45   | Clostridiales   | 45   | 2.61 |
| Sample_T5C_bin.7   | 97.17 | 0.93 | 45  | 48.4 | Bacteroidales   | 48.4 | 4.22 |
| Sample_T5C_bin.5   | 98.95 | 1.82 | 49  | 49.5 | Lachnospiraceae | 49.5 | 3.12 |
| Sample_T5C_bin.4   | 98.63 | 0.00 | 37  | 43   | Clostridiales   | 43   | 2.52 |
| Sample_T5C_bin.2   | 97.27 | 0.00 | 64  | 51.2 | Clostridiales   | 51.2 | 2.19 |
| Sample_T5C_bin.1   | 84.60 | 2.11 | 44  | 48.6 | Proteobacteria  | 48.6 | 2.02 |
| Sample_C14C_bin.29 | 97.31 | 0.00 | 11  | 53.2 | Clostridiales   | 53.2 | 1.97 |
| Sample_C8B_bin.29  | 94.34 | 0.65 | 50  | 44.1 | Bacteroidales   | 44.1 | 3.20 |
| Sample_C8B_bin.25  | 98.65 | 0.00 | 30  | 36.4 | Clostridiales   | 36.4 | 2.11 |
| Sample_C14C_bin.23 | 98.12 | 0.00 | 71  | 57.3 | Proteobacteria  | 57.3 | 2.42 |
| Sample_C8B_bin.26  | 98.51 | 0.23 | 90  | 45.4 | Bacteroidales   | 45.4 | 3.31 |
| Sample_C14C_bin.26 | 92.90 | 0.91 | 206 | 59.5 | Clostridiales   | 59.5 | 2.81 |
| Sample_C14C_bin.27 | 99.10 | 0.00 | 64  | 36   | Clostridiales   | 36   | 2.58 |
| Sample_C8B_bin.22  | 92.56 | 2.06 | 131 | 46.5 | Bacteroidales   | 46.5 | 3.20 |
| Sample_C4A_bin.10  | 95.97 | 0.00 | 64  | 44.1 | Clostridiales   | 44.1 | 2.58 |
| Sample_C4A_bin.13  | 96.41 | 0.34 | 294 | 33   | Clostridiales   | 33   | 1.89 |

|                    |       |      |     |      |                    |      |      |
|--------------------|-------|------|-----|------|--------------------|------|------|
| Sample_C4A_bin.12  | 98.63 | 0.00 | 214 | 43.1 | Clostridiales      | 43.1 | 2.88 |
| Sample_C4A_bin.14  | 89.69 | 1.58 | 57  | 41.2 | Clostridiales      | 41.2 | 2.98 |
| Sample_C4A_bin.17  | 97.98 | 0.00 | 12  | 45.6 | Clostridiales      | 45.6 | 2.12 |
| Sample_C4A_bin.16  | 98.65 | 0.67 | 149 | 41.1 | Clostridiales      | 41.1 | 1.99 |
| Sample_C4A_bin.19  | 84.19 | 0.67 | 170 | 53.6 | Clostridiales      | 53.6 | 1.84 |
| Sample_C4A_bin.18  | 94.67 | 0.84 | 171 | 36.6 | Clostridiales      | 36.6 | 3.13 |
| Sample_C14C_bin.21 | 91.47 | 0.13 | 232 | 43.7 | Bacteroidales      | 43.7 | 2.88 |
| Sample_T3C_bin.8   | 93.67 | 0.95 | 210 | 44   | Clostridiales      | 44   | 3.12 |
| Sample_C7B_bin.16  | 93.53 | 2.31 | 258 | 45.4 | Lachnospiraceae    | 45.4 | 2.17 |
| Sample_T3C_bin.5   | 89.38 | 0.73 | 272 | 59.5 | Clostridiales      | 59.5 | 1.74 |
| Sample_T3C_bin.4   | 99.41 | 0.00 | 60  | 41.7 | Lachnospiraceae    | 41.7 | 2.51 |
| Sample_T3C_bin.7   | 87.74 | 0.58 | 79  | 59.6 | Bacteroidetes      | 59.6 | 2.60 |
| Sample_T3C_bin.6   | 99.28 | 0.00 | 60  | 45.4 | Bacteroidales      | 45.4 | 4.07 |
| Sample_T3C_bin.1   | 98.18 | 1.99 | 353 | 56.6 | Bifidobacteriaceae | 56.6 | 2.24 |
| Sample_T3C_bin.3   | 97.94 | 0.00 | 112 | 43.3 | Clostridiales      | 43.3 | 2.50 |
| Sample_C2A_bin.56  | 98.65 | 0.67 | 23  | 37.4 | Clostridiales      | 37.4 | 2.10 |
| Sample_C6A_bin.16  | 93.60 | 1.34 | 36  | 49.5 | Clostridiales      | 49.5 | 2.01 |
| Sample_C14C_bin.25 | 91.72 | 0.22 | 342 | 50.9 | Clostridiales      | 50.9 | 2.37 |
| Sample_C7C_bin.21  | 97.31 | 0.00 | 30  | 43.5 | Clostridiales      | 43.5 | 2.02 |
| Sample_C7C_bin.23  | 98.37 | 1.63 | 215 | 42.3 | Bacteroidales      | 42.3 | 5.04 |
| Sample_C6A_bin.15  | 97.76 | 0.34 | 101 | 36.6 | Clostridiales      | 36.6 | 2.01 |
| Sample_C6A_bin.14  | 92.99 | 4.58 | 147 | 42.6 | Lachnospiraceae    | 42.6 | 3.36 |
| Sample_T2C_bin.32  | 98.75 | 0.47 | 81  | 44.3 | Bacteroidales      | 44.3 | 3.60 |
| Sample_T2C_bin.30  | 89.64 | 0.84 | 79  | 49.7 | Clostridiales      | 49.7 | 2.09 |
| Sample_T2C_bin.36  | 87.52 | 0.93 | 450 | 58.1 | Clostridiales      | 58.1 | 2.75 |
| Sample_T2C_bin.37  | 98.30 | 0.38 | 139 | 43.4 | Bacteroidales      | 43.4 | 3.04 |
| Sample_T4C_bin.18  | 84.24 | 0.00 | 88  | 41.7 | Bacteroides        | 41.7 | 5.36 |
| Sample_T4C_bin.19  | 92.61 | 0.67 | 31  | 60   | Clostridiales      | 60   | 1.99 |
| Sample_T4C_bin.16  | 90.24 | 0.58 | 258 | 41   | Lachnospiraceae    | 41   | 2.44 |
| Sample_T2C_bin.38  | 85.02 | 0.50 | 336 | 46.2 | Bacteroidetes      | 46.2 | 2.04 |
| Sample_C7B_bin.18  | 98.73 | 0.02 | 116 | 48.5 | Firmicutes         | 48.5 | 2.18 |
| Sample_T4C_bin.12  | 94.62 | 1.70 | 43  | 59.1 | Clostridiales      | 59.1 | 2.16 |
| Sample_T4C_bin.13  | 98.63 | 0.00 | 29  | 43.1 | Clostridiales      | 43.1 | 2.70 |
| Sample_T4C_bin.10  | 98.65 | 0.00 | 238 | 57.2 | Clostridiales      | 57.2 | 2.96 |
| Sample_T4C_bin.11  | 92.59 | 2.54 | 51  | 62.7 | Clostridiales      | 62.7 | 1.99 |
| Sample_C4C_bin.39  | 97.98 | 0.00 | 85  | 46   | Clostridiales      | 46   | 2.43 |
| Sample_C4C_bin.38  | 99.32 | 0.00 | 30  | 44.1 | Clostridiales      | 44.1 | 2.82 |
| Sample_C12C_bin.9  | 95.24 | 0.67 | 192 | 38.1 | Clostridiales      | 38.1 | 1.77 |
| Sample_C12C_bin.8  | 86.24 | 1.95 | 48  | 56.8 | Clostridiales      | 56.8 | 2.18 |

|                    |        |      |     |      |                 |      |      |
|--------------------|--------|------|-----|------|-----------------|------|------|
| Sample_C4C_bin.31  | 98.73  | 0.02 | 58  | 48.3 | Firmicutes      | 48.3 | 2.16 |
| Sample_C12C_bin.4  | 93.25  | 1.28 | 34  | 27.7 | Bacteria        | 27.7 | 1.25 |
| Sample_C12C_bin.7  | 98.99  | 0.00 | 48  | 44.9 | Clostridiales   | 44.9 | 2.59 |
| Sample_C12C_bin.6  | 90.26  | 0.67 | 38  | 60.3 | Clostridiales   | 60.3 | 1.93 |
| Sample_C4C_bin.35  | 98.65  | 0.00 | 190 | 36.3 | Clostridiales   | 36.3 | 4.17 |
| Sample_C4C_bin.34  | 97.26  | 0.00 | 186 | 43.1 | Clostridiales   | 43.1 | 2.54 |
| Sample_C12C_bin.3  | 95.61  | 1.60 | 305 | 45.4 | Bacteroidales   | 45.4 | 4.28 |
| Sample_C12C_bin.2  | 92.45  | 0.00 | 85  | 36.3 | Clostridiales   | 36.3 | 2.26 |
| Sample_C2A_bin.52  | 90.24  | 2.46 | 89  | 61.1 | Clostridiales   | 61.1 | 2.06 |
| Sample_T5A_bin.24  | 98.79  | 0.48 | 38  | 58.5 | Bacteroidetes   | 58.5 | 3.14 |
| Sample_T5A_bin.25  | 92.47  | 2.35 | 72  | 42.9 | Bacteroides     | 42.9 | 5.49 |
| Sample_T5A_bin.26  | 97.29  | 0.09 | 83  | 44.4 | Bacteroidales   | 44.4 | 3.12 |
| Sample_T5A_bin.27  | 100.00 | 0.11 | 113 | 48.5 | Proteobacteria  | 48.5 | 2.82 |
| Sample_T5A_bin.20  | 91.93  | 0.74 | 111 | 46.6 | Bacteroidales   | 46.6 | 4.07 |
| Sample_T5A_bin.21  | 99.13  | 0.00 | 41  | 48.6 | Bacteroidales   | 48.6 | 3.54 |
| Sample_T5A_bin.22  | 95.35  | 1.27 | 105 | 41.5 | Clostridiales   | 41.5 | 3.21 |
| Sample_T5A_bin.23  | 94.83  | 0.76 | 89  | 44.8 | Clostridiales   | 44.8 | 2.93 |
| Sample_C8A_bin.24  | 93.70  | 0.48 | 275 | 59.6 | Bacteroidetes   | 59.6 | 2.66 |
| Sample_C8A_bin.25  | 96.48  | 0.74 | 124 | 48.6 | Bacteroidales   | 48.6 | 3.49 |
| Sample_C8A_bin.26  | 94.02  | 0.63 | 123 | 40.6 | Bacteroidales   | 40.6 | 3.09 |
| Sample_T5A_bin.28  | 99.03  | 1.28 | 53  | 44.9 | Bacteroidales   | 44.9 | 4.72 |
| Sample_C8A_bin.21  | 98.65  | 0.34 | 58  | 38.7 | Clostridiales   | 38.7 | 2.30 |
| Sample_C8A_bin.22  | 98.71  | 0.13 | 115 | 45.3 | Bacteroidales   | 45.3 | 4.14 |
| Sample_T4A_bin.40  | 98.42  | 0.78 | 86  | 34.6 | Lactobacillus   | 34.6 | 1.90 |
| Sample_T14C_bin.26 | 98.63  | 0.00 | 33  | 42.9 | Clostridiales   | 42.9 | 2.76 |
| Sample_C7B_bin.31  | 98.98  | 2.43 | 45  | 44.9 | Prevotella      | 44.9 | 3.53 |
| Sample_C7B_bin.30  | 94.68  | 1.88 | 91  | 54.5 | Proteobacteria  | 54.5 | 2.08 |
| Sample_C7B_bin.33  | 99.51  | 1.93 | 173 | 41.1 | Lachnospiraceae | 41.1 | 3.09 |
| Sample_C7B_bin.32  | 94.29  | 1.01 | 72  | 61.5 | Clostridiales   | 61.5 | 1.93 |
| Sample_C5C_bin.4   | 80.06  | 1.96 | 313 | 50   | Clostridiales   | 50   | 1.98 |
| Sample_C5C_bin.7   | 97.31  | 0.00 | 6   | 52.8 | Clostridiales   | 52.8 | 2.02 |
| Sample_C12C_bin.64 | 98.30  | 4.40 | 42  | 43.5 | Lachnospiraceae | 43.5 | 2.93 |
| Sample_C5C_bin.9   | 96.86  | 0.00 | 78  | 36.5 | Clostridiales   | 36.5 | 3.14 |
| Sample_C12C_bin.60 | 92.00  | 1.33 | 43  | 25.9 | Bacteria        | 25.9 | 1.35 |
| Sample_T14C_bin.21 | 89.19  | 0.81 | 38  | 46.8 | Bacteroidales   | 46.8 | 3.38 |
| Sample_T16C_bin.2  | 97.78  | 0.63 | 15  | 44.1 | Clostridiales   | 44.1 | 3.33 |
| Sample_T16C_bin.3  | 98.55  | 3.14 | 51  | 46.7 | Lachnospiraceae | 46.7 | 3.32 |
| Sample_T16C_bin.4  | 94.09  | 2.22 | 70  | 41   | Clostridiales   | 41   | 3.48 |
| Sample_T6B_bin.16  | 99.25  | 1.16 | 72  | 45.5 | Bacteroidales   | 45.5 | 3.48 |

|                    |        |      |     |      |                    |      |      |
|--------------------|--------|------|-----|------|--------------------|------|------|
| Sample_T16C_bin.6  | 100.00 | 0.46 | 34  | 59.9 | Bifidobacteriaceae | 59.9 | 2.43 |
| Sample_T6B_bin.14  | 99.27  | 0.48 | 43  | 41.8 | Lachnospiraceae    | 41.8 | 2.66 |
| Sample_T6B_bin.19  | 98.65  | 1.01 | 62  | 40.5 | Clostridiales      | 40.5 | 2.19 |
| Sample_C9A_bin.39  | 94.40  | 3.57 | 94  | 58.4 | Clostridiales      | 58.4 | 2.23 |
| Sample_C10A_bin.64 | 97.04  | 1.34 | 22  | 52.9 | Clostridiales      | 52.9 | 2.36 |
| Sample_C10A_bin.65 | 93.55  | 1.26 | 82  | 41.2 | Lachnospiraceae    | 41.2 | 2.91 |
| Sample_C10A_bin.66 | 98.73  | 0.00 | 165 | 51.7 | Firmicutes         | 51.7 | 2.44 |
| Sample_C10A_bin.60 | 90.61  | 0.90 | 41  | 50.3 | Bacteroidales      | 50.3 | 2.35 |
| Sample_C10A_bin.62 | 93.82  | 3.93 | 32  | 27.9 | Bacteria           | 27.9 | 1.23 |
| Sample_C10A_bin.63 | 91.57  | 2.25 | 26  | 26.3 | Bacteria           | 26.3 | 1.14 |
| Sample_C9A_bin.32  | 87.93  | 2.24 | 58  | 57.6 | Clostridiales      | 57.6 | 2.15 |
| Sample_C10A_bin.68 | 97.67  | 1.90 | 38  | 48   | Clostridiales      | 48   | 2.99 |
| Sample_C10A_bin.69 | 99.51  | 0.98 | 29  | 40.8 | Lachnospiraceae    | 40.8 | 2.65 |
| Sample_C2C_bin.43  | 97.98  | 0.34 | 405 | 44.6 | Clostridiales      | 44.6 | 1.91 |
| Sample_T11A_bin.28 | 97.17  | 0.37 | 38  | 48.4 | Bacteroidales      | 48.4 | 3.79 |
| Sample_C9C_bin.9   | 86.61  | 1.39 | 184 | 41.5 | Clostridiales      | 41.5 | 3.23 |
| Sample_T11A_bin.22 | 99.01  | 0.00 | 50  | 43.2 | Bacteria           | 43.2 | 4.08 |
| Sample_C9C_bin.5   | 82.73  | 1.88 | 59  | 41.8 | Bacteroidales      | 41.8 | 4.13 |
| Sample_T11A_bin.20 | 98.65  | 1.34 | 106 | 33.8 | Clostridiales      | 33.8 | 2.27 |
| Sample_C9C_bin.7   | 86.70  | 0.67 | 33  | 61.7 | Clostridiales      | 61.7 | 2.18 |
| Sample_T11A_bin.27 | 97.73  | 0.00 | 188 | 43.5 | Bacteroidales      | 43.5 | 2.91 |
| Sample_T11A_bin.24 | 99.51  | 0.96 | 93  | 54.4 | Bacteroidetes      | 54.4 | 2.36 |
| Sample_C9C_bin.3   | 96.63  | 1.44 | 38  | 54.3 | Bacteroidetes      | 54.3 | 2.28 |
| Sample_T8C_bin.30  | 91.54  | 0.36 | 44  | 63.8 | Clostridiales      | 63.8 | 2.79 |
| Sample_T11C_bin.10 | 97.26  | 0.00 | 163 | 42.8 | Clostridiales      | 42.8 | 2.74 |
| Sample_T8C_bin.32  | 98.27  | 3.74 | 52  | 46.7 | Lachnospiraceae    | 46.7 | 7.27 |
| Sample_T11C_bin.12 | 94.40  | 0.00 | 20  | 43.1 | Lachnospiraceae    | 43.1 | 2.15 |
| Sample_T8C_bin.34  | 96.60  | 0.34 | 719 | 51.4 | Clostridiales      | 51.4 | 2.31 |
| Sample_T11C_bin.14 | 99.32  | 1.01 | 29  | 40.6 | Clostridiales      | 40.6 | 2.14 |
| Sample_T8C_bin.36  | 99.51  | 2.69 | 37  | 54.1 | Bacteroidetes      | 54.1 | 2.38 |
| Sample_T8C_bin.37  | 92.44  | 1.01 | 46  | 61.8 | Clostridiales      | 61.8 | 1.92 |
| Sample_T11C_bin.19 | 86.37  | 1.30 | 225 | 47.2 | Bacteroidales      | 47.2 | 3.50 |
| Sample_T8C_bin.39  | 81.60  | 0.79 | 350 | 40.3 | Clostridiales      | 40.3 | 2.29 |
| Sample_C2A_bin.13  | 95.14  | 2.85 | 39  | 48.2 | Clostridiales      | 48.2 | 2.95 |
| Sample_C13B_bin.24 | 81.21  | 2.82 | 139 | 40   | Streptococcus      | 40   | 1.60 |
| Sample_C13B_bin.25 | 99.03  | 0.97 | 34  | 41.5 | Lachnospiraceae    | 41.5 | 2.69 |
| Sample_C13B_bin.22 | 94.83  | 2.18 | 380 | 42.5 | Bacteroides        | 42.5 | 5.85 |
| Sample_C13B_bin.20 | 100.00 | 0.63 | 33  | 31.3 | Firmicutes         | 31.3 | 2.47 |
| Sample_C13B_bin.21 | 89.93  | 1.68 | 127 | 59.5 | Clostridiales      | 59.5 | 2.18 |

|                    |        |      |     |      |                     |      |      |
|--------------------|--------|------|-----|------|---------------------|------|------|
| Sample_T15C_bin.20 | 95.23  | 0.04 | 99  | 58.7 | Clostridiales       | 58.7 | 3.20 |
| Sample_T15C_bin.21 | 89.00  | 0.02 | 81  | 61.3 | Clostridiales       | 61.3 | 2.12 |
| Sample_T15C_bin.22 | 100.00 | 0.06 | 22  | 44.5 | Clostridiales       | 44.5 | 2.90 |
| Sample_T12A_bin.48 | 85.31  | 1.78 | 329 | 64.5 | Deltaproteobacteria | 64.5 | 2.00 |
| Sample_T15C_bin.24 | 92.61  | 0.00 | 274 | 36.5 | Clostridiales       | 36.5 | 1.84 |
| Sample_T15C_bin.26 | 98.10  | 0.63 | 28  | 45.3 | Firmicutes          | 45.3 | 1.76 |
| Sample_T15C_bin.29 | 99.32  | 0.00 | 42  | 40.3 | Clostridiales       | 40.3 | 2.33 |
| Sample_T12A_bin.41 | 97.11  | 4.52 | 40  | 54.9 | Bacteroidetes       | 54.9 | 2.22 |
| Sample_T12A_bin.45 | 96.42  | 1.34 | 72  | 43.8 | Clostridiales       | 43.8 | 2.83 |
| Sample_T12A_bin.44 | 84.99  | 0.74 | 212 | 47.8 | Bacteroidales       | 47.8 | 3.35 |
| Sample_T5B_bin.36  | 95.32  | 0.19 | 64  | 43.3 | Lachnospiraceae     | 43.3 | 2.58 |
| Sample_T5B_bin.37  | 93.82  | 1.74 | 172 | 41   | Clostridiales       | 41   | 3.18 |
| Sample_T5B_bin.34  | 80.11  | 2.27 | 30  | 58.3 | Clostridiales       | 58.3 | 1.59 |
| Sample_C2A_bin.1   | 98.65  | 0.67 | 216 | 44.2 | Clostridiales       | 44.2 | 2.77 |
| Sample_T5B_bin.32  | 97.29  | 0.00 | 82  | 37.5 | Clostridiales       | 37.5 | 2.78 |
| Sample_T5B_bin.33  | 98.04  | 0.00 | 193 | 45.4 | Bacteroidales       | 45.4 | 3.99 |
| Sample_T5B_bin.30  | 98.79  | 0.48 | 165 | 58.5 | Bacteroidetes       | 58.5 | 3.15 |
| Sample_T5B_bin.31  | 98.65  | 2.80 | 37  | 37.6 | Clostridiales       | 37.6 | 3.28 |
| Sample_T5B_bin.38  | 95.78  | 2.85 | 32  | 48   | Clostridiales       | 48   | 2.98 |
| Sample_C5A_bin.61  | 100.00 | 0.23 | 57  | 56.4 | Bifidobacteriaceae  | 56.4 | 2.23 |
| Sample_C5A_bin.62  | 96.81  | 4.56 | 84  | 38.3 | Clostridiales       | 38.3 | 2.73 |
| Sample_C5A_bin.58  | 92.69  | 0.56 | 103 | 24.9 | Bacteria            | 24.9 | 1.44 |
| Sample_C5A_bin.59  | 98.60  | 0.93 | 103 | 58.1 | Clostridiales       | 58.1 | 2.96 |
| Sample_C5A_bin.57  | 95.57  | 3.86 | 52  | 41.7 | Lachnospiraceae     | 41.7 | 2.81 |
| Sample_C5A_bin.53  | 85.73  | 1.28 | 41  | 48.8 | Bacteroidales       | 48.8 | 3.08 |
| Sample_T2A_bin.19  | 88.03  | 0.85 | 40  | 32.7 | Bacteria            | 32.7 | 1.95 |
| Sample_C4C_bin.46  | 89.14  | 1.01 | 411 | 38   | Clostridiales       | 38   | 2.41 |
| Sample_C4C_bin.47  | 92.43  | 1.86 | 243 | 47   | Bacteroidales       | 47   | 3.90 |
| Sample_C5C_bin.13  | 95.63  | 3.37 | 14  | 44.1 | Selenomonadales     | 44.1 | 2.20 |
| Sample_C4C_bin.40  | 92.78  | 0.96 | 20  | 54.6 | Bacteroidetes       | 54.6 | 1.96 |
| Sample_C1C_bin.23  | 97.71  | 0.00 | 40  | 43.1 | Clostridiales       | 43.1 | 2.56 |
| Sample_C1C_bin.22  | 96.42  | 0.67 | 92  | 54.8 | Clostridiales       | 54.8 | 2.58 |
| Sample_C1C_bin.21  | 96.93  | 0.19 | 144 | 48.8 | Lachnospiraceae     | 48.8 | 2.73 |
| Sample_C1C_bin.20  | 97.10  | 0.92 | 47  | 42.9 | Lachnospiraceae     | 42.9 | 3.34 |
| Sample_C1C_bin.27  | 98.51  | 4.66 | 45  | 46.6 | Bacteroidales       | 46.6 | 4.29 |
| Sample_C1C_bin.26  | 98.63  | 4.70 | 58  | 37.4 | Clostridiales       | 37.4 | 2.82 |
| Sample_C1C_bin.29  | 83.91  | 3.57 | 58  | 59.2 | Clostridiales       | 59.2 | 2.04 |
| Sample_T13B_bin.34 | 97.98  | 1.06 | 305 | 38.3 | Clostridiales       | 38.3 | 2.85 |
| Sample_C1A_bin.36  | 96.57  | 0.96 | 74  | 55.1 | Bacteroidetes       | 55.1 | 1.96 |

|                    |        |      |     |      |                    |      |      |
|--------------------|--------|------|-----|------|--------------------|------|------|
| Sample_C2A_bin.39  | 98.10  | 0.87 | 116 | 48.6 | Firmicutes         | 48.6 | 2.10 |
| Sample_C2A_bin.38  | 84.80  | 1.74 | 394 | 46.8 | Prevotella         | 46.8 | 2.82 |
| Sample_T18B_bin.19 | 97.98  | 4.70 | 23  | 35.9 | Clostridiales      | 35.9 | 2.69 |
| Sample_T6A_bin.12  | 98.06  | 1.55 | 11  | 41.2 | Lachnospiraceae    | 41.2 | 2.50 |
| Sample_T6A_bin.13  | 97.31  | 0.00 | 225 | 52.8 | Clostridiales      | 52.8 | 1.98 |
| Sample_T6A_bin.11  | 97.98  | 0.69 | 119 | 51.9 | Clostridiales      | 51.9 | 2.53 |
| Sample_C2A_bin.32  | 97.90  | 0.56 | 156 | 41.6 | Lachnospiraceae    | 41.6 | 2.78 |
| Sample_T18B_bin.16 | 96.85  | 0.24 | 49  | 41.7 | Lachnospiraceae    | 41.7 | 2.59 |
| Sample_C2A_bin.37  | 96.13  | 1.33 | 76  | 42.8 | Lachnospiraceae    | 42.8 | 3.27 |
| Sample_T18B_bin.14 | 92.19  | 2.33 | 69  | 47.5 | Lachnospiraceae    | 47.5 | 2.79 |
| Sample_C8B_bin.38  | 98.46  | 0.40 | 127 | 45.4 | Bacteroidales      | 45.4 | 4.05 |
| Sample_C14C_bin.31 | 98.18  | 0.32 | 78  | 60.1 | Bacteroidetes      | 60.1 | 2.67 |
| Sample_C8B_bin.37  | 80.38  | 3.53 | 183 | 59.6 | Clostridiales      | 59.6 | 2.03 |
| Sample_C14C_bin.33 | 91.43  | 0.00 | 45  | 42   | Bacteroidales      | 42   | 4.31 |
| Sample_C8B_bin.35  | 98.32  | 3.60 | 127 | 61.4 | Clostridiales      | 61.4 | 2.33 |
| Sample_C14C_bin.35 | 97.98  | 0.00 | 124 | 47   | Clostridiales      | 47   | 3.01 |
| Sample_C14C_bin.34 | 98.73  | 1.21 | 131 | 43.5 | Lachnospiraceae    | 43.5 | 2.84 |
| Sample_C8B_bin.30  | 99.84  | 0.23 | 71  | 56.6 | Bifidobacteriaceae | 56.6 | 2.28 |
| Sample_C8B_bin.31  | 99.96  | 0.33 | 111 | 50.8 | Enterobacteriaceae | 50.8 | 5.01 |
| Sample_C11C_bin.10 | 98.65  | 0.67 | 123 | 44   | Clostridiales      | 44   | 2.84 |
| Sample_T13B_bin.47 | 95.92  | 0.76 | 50  | 46.4 | Bacteroidales      | 46.4 | 4.30 |
| Sample_T6C_bin.14  | 98.31  | 0.71 | 43  | 47.8 | Clostridiales      | 47.8 | 3.06 |
| Sample_T13B_bin.46 | 89.81  | 0.37 | 66  | 44.3 | Bacteroidales      | 44.3 | 3.27 |
| Sample_T13B_bin.45 | 89.55  | 0.00 | 109 | 40.1 | Clostridiales      | 40.1 | 2.22 |
| Sample_T13B_bin.42 | 90.10  | 2.01 | 39  | 58.7 | Clostridiales      | 58.7 | 2.08 |
| Sample_T17C_bin.17 | 100.00 | 1.10 | 21  | 42.2 | Selenomonadales    | 42.2 | 1.89 |
| Sample_T17C_bin.16 | 99.55  | 0.00 | 26  | 60.4 | Bifidobacteriaceae | 60.4 | 1.91 |
| Sample_T17C_bin.15 | 98.65  | 0.02 | 18  | 36   | Clostridiales      | 36   | 2.72 |
| Sample_T17C_bin.14 | 89.87  | 0.63 | 125 | 46.8 | Clostridiales      | 46.8 | 2.94 |
| Sample_T17C_bin.13 | 98.73  | 1.44 | 46  | 41   | Clostridiales      | 41   | 3.57 |
| Sample_T17C_bin.12 | 98.86  | 0.73 | 113 | 40.5 | Bacteroidales      | 40.5 | 3.74 |
| Sample_T17C_bin.11 | 98.65  | 0.67 | 67  | 33.2 | Clostridiales      | 33.2 | 2.20 |
| Sample_T17C_bin.10 | 98.94  | 0.00 | 15  | 38   | Lactobacillus      | 38   | 1.99 |
| Sample_T2C_bin.34  | 98.51  | 3.07 | 17  | 44.9 | Bacteroidales      | 44.9 | 3.76 |
| Sample_T4C_bin.14  | 99.09  | 0.68 | 71  | 56.7 | Bifidobacteriaceae | 56.7 | 2.20 |
| Sample_C4C_bin.28  | 97.98  | 3.36 | 36  | 58   | Clostridiales      | 58   | 2.03 |
| Sample_C4C_bin.29  | 98.65  | 0.00 | 35  | 36.3 | Clostridiales      | 36.3 | 2.57 |
| Sample_C4C_bin.22  | 90.22  | 0.72 | 87  | 59.5 | Bacteroidetes      | 59.5 | 2.50 |
| Sample_C4C_bin.23  | 98.86  | 0.38 | 214 | 43.4 | Bacteroidales      | 43.4 | 3.03 |

|                    |        |      |     |      |                    |      |      |
|--------------------|--------|------|-----|------|--------------------|------|------|
| Sample_C4C_bin.20  | 93.60  | 0.44 | 765 | 49.8 | Lachnospiraceae    | 49.8 | 2.80 |
| Sample_C4C_bin.21  | 80.09  | 1.28 | 281 | 45.4 | Bacteroidales      | 45.4 | 3.43 |
| Sample_C4C_bin.27  | 97.31  | 0.00 | 67  | 49.6 | Clostridiales      | 49.6 | 2.25 |
| Sample_C4C_bin.24  | 98.65  | 3.02 | 68  | 37.3 | Clostridiales      | 37.3 | 2.43 |
| Sample_C4C_bin.25  | 97.31  | 0.00 | 16  | 44.1 | Clostridiales      | 44.1 | 2.72 |
| Sample_C7A_bin.18  | 87.25  | 2.05 | 234 | 55.3 | Bacteroidetes      | 55.3 | 1.93 |
| Sample_C7A_bin.19  | 89.52  | 2.07 | 237 | 41.9 | Lachnospiraceae    | 41.9 | 2.85 |
| Sample_C7A_bin.12  | 97.92  | 0.13 | 58  | 49.9 | Bacteroidales      | 49.9 | 2.51 |
| Sample_C7A_bin.13  | 96.13  | 2.53 | 84  | 45.6 | Lachnospiraceae    | 45.6 | 3.41 |
| Sample_C7A_bin.10  | 85.69  | 1.27 | 335 | 41.9 | Clostridiales      | 41.9 | 2.75 |
| Sample_C7A_bin.11  | 95.85  | 0.38 | 184 | 41.7 | Bacteroidales      | 41.7 | 4.34 |
| Sample_C7A_bin.16  | 86.97  | 2.35 | 347 | 38.2 | Clostridiales      | 38.2 | 2.44 |
| Sample_C7A_bin.17  | 95.59  | 0.79 | 94  | 59   | Clostridiales      | 59   | 2.51 |
| Sample_C7A_bin.14  | 89.93  | 2.07 | 26  | 56.9 | Clostridiales      | 56.9 | 2.03 |
| Sample_T1B_bin.2   | 98.24  | 1.75 | 113 | 42.5 | Bacteria           | 42.5 | 4.13 |
| Sample_T1B_bin.3   | 99.05  | 0.47 | 116 | 33.5 | Bacteria           | 33.5 | 2.30 |
| Sample_T1B_bin.1   | 99.27  | 0.00 | 109 | 41.6 | Lachnospiraceae    | 41.6 | 2.83 |
| Sample_T1B_bin.7   | 99.32  | 0.00 | 17  | 36   | Clostridiales      | 36   | 2.66 |
| Sample_T1B_bin.4   | 81.31  | 0.68 | 95  | 57.8 | Clostridiales      | 57.8 | 1.94 |
| Sample_T1B_bin.5   | 100.00 | 1.27 | 125 | 31.2 | Firmicutes         | 31.2 | 2.50 |
| Sample_T4C_bin.23  | 98.15  | 0.06 | 183 | 59.8 | Bifidobacteriaceae | 59.8 | 2.63 |
| Sample_T4C_bin.21  | 93.08  | 0.00 | 95  | 43.3 | Bacteria           | 43.3 | 3.74 |
| Sample_T4C_bin.20  | 97.27  | 0.68 | 257 | 56.3 | Clostridiales      | 56.3 | 2.32 |
| Sample_T4C_bin.27  | 99.32  | 1.51 | 24  | 40.5 | Clostridiales      | 40.5 | 2.34 |
| Sample_T4C_bin.26  | 94.05  | 2.38 | 80  | 58.7 | Clostridiales      | 58.7 | 2.44 |
| Sample_T4C_bin.29  | 98.65  | 0.06 | 133 | 46.2 | Clostridiales      | 46.2 | 2.94 |
| Sample_T4C_bin.28  | 89.86  | 1.90 | 589 | 50.1 | Clostridiales      | 50.1 | 5.38 |
| Sample_C4C_bin.30  | 89.93  | 2.68 | 108 | 61.7 | Clostridiales      | 61.7 | 1.93 |
| Sample_C4C_bin.33  | 92.58  | 0.00 | 49  | 60.3 | Clostridiales      | 60.3 | 2.43 |
| Sample_C7B_bin.22  | 93.28  | 1.34 | 49  | 58.6 | Clostridiales      | 58.6 | 2.04 |
| Sample_C7B_bin.23  | 98.65  | 0.17 | 24  | 44   | Clostridiales      | 44   | 2.88 |
| Sample_T12B_bin.17 | 99.32  | 0.34 | 30  | 44.1 | Clostridiales      | 44.1 | 2.82 |
| Sample_C7B_bin.21  | 96.84  | 1.15 | 205 | 60.1 | Bacteroidetes      | 60.1 | 2.64 |
| Sample_C7B_bin.27  | 94.33  | 2.40 | 150 | 43.2 | Clostridiales      | 43.2 | 2.50 |
| Sample_C7B_bin.24  | 91.27  | 4.43 | 306 | 58.2 | Clostridiales      | 58.2 | 2.01 |
| Sample_C7B_bin.25  | 95.56  | 0.65 | 125 | 49   | Clostridiales      | 49   | 2.54 |
| Sample_T16A_bin.2  | 93.45  | 1.56 | 314 | 45   | Lachnospiraceae    | 45   | 2.54 |
| Sample_C7B_bin.29  | 98.70  | 0.28 | 109 | 45.7 | Bacteroidales      | 45.7 | 3.48 |
| Sample_T12B_bin.19 | 97.98  | 0.34 | 65  | 46   | Clostridiales      | 46   | 2.40 |

|                    |        |      |     |      |                     |      |      |
|--------------------|--------|------|-----|------|---------------------|------|------|
| Sample_T16A_bin.5  | 85.05  | 2.44 | 219 | 60.5 | Clostridiales       | 60.5 | 1.67 |
| Sample_T17C_bin.4  | 97.66  | 0.00 | 59  | 43.1 | Lachnospiraceae     | 43.1 | 2.82 |
| Sample_C4C_bin.37  | 92.04  | 3.10 | 269 | 37.7 | Clostridiales       | 37.7 | 2.38 |
| Sample_T17C_bin.2  | 96.72  | 0.33 | 94  | 51.1 | Enterobacteriaceae  | 51.1 | 4.21 |
| Sample_C9A_bin.29  | 80.95  | 2.01 | 383 | 37.3 | Clostridiales       | 37.3 | 2.13 |
| Sample_T14B_bin.33 | 97.98  | 0.34 | 15  | 44.1 | Clostridiales       | 44.1 | 2.01 |
| Sample_C9A_bin.24  | 82.61  | 0.00 | 37  | 37.1 | Bacteria            | 37.1 | 2.63 |
| Sample_C9A_bin.27  | 97.98  | 1.34 | 156 | 33.2 | Clostridiales       | 33.2 | 2.14 |
| Sample_C9A_bin.26  | 99.70  | 0.00 | 279 | 59.8 | Deltaproteobacteria | 59.8 | 4.22 |
| Sample_C9A_bin.21  | 99.98  | 1.50 | 25  | 43.7 | Selenomonadales     | 43.7 | 2.40 |
| Sample_C9A_bin.20  | 94.06  | 0.19 | 76  | 42.2 | Bacteroidales       | 42.2 | 3.36 |
| Sample_C9A_bin.23  | 97.98  | 0.00 | 65  | 42.3 | Clostridiales       | 42.3 | 2.56 |
| Sample_T18C_bin.21 | 91.32  | 1.25 | 24  | 60.4 | Clostridiales       | 60.4 | 2.42 |
| Sample_T18C_bin.23 | 99.98  | 1.50 | 39  | 43.6 | Selenomonadales     | 43.6 | 2.42 |
| Sample_T18C_bin.25 | 91.57  | 0.78 | 136 | 41.1 | Lachnospiraceae     | 41.1 | 2.24 |
| Sample_T18C_bin.24 | 98.14  | 1.12 | 43  | 46.2 | Bacteroidales       | 46.2 | 3.41 |
| Sample_T18C_bin.27 | 97.31  | 0.00 | 11  | 53   | Clostridiales       | 53   | 1.95 |
| Sample_T12A_bin.21 | 83.91  | 0.22 | 212 | 60.3 | Clostridiales       | 60.3 | 1.92 |
| Sample_C12A_bin.29 | 95.30  | 0.00 | 23  | 42.4 | Clostridiales       | 42.4 | 1.93 |
| Sample_T11A_bin.39 | 98.11  | 1.93 | 52  | 41.6 | Lachnospiraceae     | 41.6 | 2.69 |
| Sample_T11A_bin.38 | 99.42  | 0.13 | 63  | 45   | Bacteroidales       | 45   | 4.83 |
| Sample_T11A_bin.31 | 97.98  | 1.51 | 120 | 38.4 | Clostridiales       | 38.4 | 2.82 |
| Sample_T11A_bin.30 | 94.30  | 0.00 | 54  | 49.2 | Clostridiales       | 49.2 | 2.50 |
| Sample_T11A_bin.33 | 93.31  | 0.48 | 66  | 41.8 | Lachnospiraceae     | 41.8 | 2.89 |
| Sample_T11A_bin.32 | 93.09  | 0.23 | 108 | 56.7 | Bifidobacteriaceae  | 56.7 | 1.94 |
| Sample_T11A_bin.35 | 100.00 | 0.81 | 29  | 60   | Actinobacteria      | 60   | 2.14 |
| Sample_T11A_bin.34 | 94.55  | 0.00 | 106 | 60.6 | Clostridiales       | 60.6 | 2.40 |
| Sample_T11A_bin.37 | 93.29  | 2.01 | 71  | 57.9 | Clostridiales       | 57.9 | 2.02 |
| Sample_T8A_bin.7   | 96.92  | 1.25 | 205 | 47.2 | Selenomonadales     | 47.2 | 2.17 |
| Sample_T13C_bin.3  | 99.32  | 1.01 | 88  | 40.4 | Clostridiales       | 40.4 | 2.32 |
| Sample_T11C_bin.25 | 98.47  | 0.24 | 46  | 49.5 | Lachnospiraceae     | 49.5 | 3.02 |
| Sample_T13C_bin.1  | 93.95  | 0.34 | 10  | 44.8 | Clostridiales       | 44.8 | 1.76 |
| Sample_T11C_bin.27 | 98.65  | 0.00 | 61  | 58.8 | Clostridiales       | 58.8 | 2.03 |
| Sample_T11C_bin.20 | 92.69  | 4.49 | 20  | 26   | Bacteria            | 26   | 1.29 |
| Sample_C12B_bin.29 | 85.01  | 2.68 | 136 | 56.8 | Clostridiales       | 56.8 | 1.95 |
| Sample_T11C_bin.22 | 87.68  | 0.63 | 335 | 42.2 | Clostridiales       | 42.2 | 2.19 |
| Sample_T14A_bin.46 | 98.63  | 0.00 | 66  | 42.4 | Clostridiales       | 42.4 | 3.03 |
| Sample_T14A_bin.48 | 93.91  | 1.44 | 55  | 54.7 | Bacteroidetes       | 54.7 | 2.03 |
| Sample_T13C_bin.9  | 83.27  | 1.76 | 74  | 59.8 | Clostridiales       | 59.8 | 1.91 |



|                    |        |      |     |      |                    |      |      |
|--------------------|--------|------|-----|------|--------------------|------|------|
| Sample_T13C_bin.8  | 99.36  | 0.63 | 125 | 49.2 | Proteobacteria     | 49.2 | 2.31 |
| Sample_T11C_bin.28 | 99.24  | 0.38 | 91  | 43.4 | Bacteroidales      | 43.4 | 2.98 |
| Sample_T11C_bin.29 | 89.03  | 0.13 | 95  | 62.7 | Clostridiales      | 62.7 | 2.77 |
| Sample_T4B_bin.4   | 99.51  | 0.96 | 67  | 54.3 | Bacteroidetes      | 54.3 | 2.34 |
| Sample_T11A_bin.9  | 98.35  | 2.27 | 108 | 44.1 | Clostridiales      | 44.1 | 3.35 |
| Sample_T11A_bin.8  | 97.31  | 0.00 | 32  | 34.3 | Clostridiales      | 34.3 | 2.23 |
| Sample_T4B_bin.1   | 98.65  | 0.34 | 78  | 44   | Clostridiales      | 44   | 2.78 |
| Sample_T4B_bin.2   | 88.59  | 0.00 | 99  | 42.6 | Bacteroidales      | 42.6 | 3.25 |
| Sample_C13B_bin.34 | 98.65  | 0.34 | 264 | 38.4 | Clostridiales      | 38.4 | 2.72 |
| Sample_C13B_bin.31 | 99.25  | 0.12 | 97  | 49.4 | Bacteroidales      | 49.4 | 2.76 |
| Sample_T8A_bin.8   | 92.51  | 2.95 | 298 | 45.8 | Clostridiales      | 45.8 | 2.79 |
| Sample_T11A_bin.5  | 94.96  | 1.34 | 333 | 55.2 | Clostridiales      | 55.2 | 2.27 |
| Sample_C13B_bin.32 | 85.99  | 1.27 | 84  | 42.6 | Clostridiales      | 42.6 | 2.02 |
| Sample_T14B_bin.26 | 98.10  | 1.50 | 72  | 48   | Clostridiales      | 48   | 3.02 |
| Sample_T14B_bin.27 | 81.59  | 2.04 | 411 | 56.4 | Clostridiales      | 56.4 | 2.13 |
| Sample_T14B_bin.24 | 98.63  | 0.00 | 37  | 42.9 | Clostridiales      | 42.9 | 2.81 |
| Sample_T14B_bin.25 | 93.28  | 1.59 | 40  | 59.8 | Clostridiales      | 59.8 | 2.13 |
| Sample_T14B_bin.22 | 99.30  | 1.17 | 87  | 58   | Clostridiales      | 58   | 3.03 |
| Sample_T15C_bin.32 | 90.60  | 2.68 | 55  | 56.7 | Clostridiales      | 56.7 | 2.47 |
| Sample_T12A_bin.38 | 84.83  | 0.56 | 65  | 26.7 | Bacteria           | 26.7 | 1.04 |
| Sample_T12A_bin.39 | 96.97  | 0.73 | 139 | 36.6 | Clostridiales      | 36.6 | 1.70 |
| Sample_T12A_bin.36 | 99.18  | 0.00 | 32  | 46.7 | Lactobacillales    | 46.7 | 2.05 |
| Sample_T12A_bin.35 | 90.90  | 2.55 | 298 | 28.8 | Clostridiales      | 28.8 | 2.26 |
| Sample_T12A_bin.32 | 91.94  | 0.34 | 44  | 44.3 | Clostridiales      | 44.3 | 1.82 |
| Sample_T12A_bin.33 | 93.95  | 2.01 | 422 | 60.3 | Clostridiales      | 60.3 | 1.98 |
| Sample_T12A_bin.30 | 93.58  | 0.00 | 25  | 43.5 | Clostridiales      | 43.5 | 1.98 |
| Sample_T15C_bin.38 | 98.65  | 0.34 | 107 | 38.8 | Clostridiales      | 38.8 | 2.64 |
| Sample_C6A_bin.9   | 95.43  | 1.03 | 93  | 44.5 | Bacteroidales      | 44.5 | 3.12 |
| Sample_C6A_bin.8   | 98.10  | 0.02 | 115 | 48.6 | Firmicutes         | 48.6 | 2.12 |
| Sample_T10B_bin.21 | 89.19  | 0.67 | 35  | 38.6 | Clostridiales      | 38.6 | 2.43 |
| Sample_C11B_bin.32 | 94.60  | 0.69 | 70  | 45.2 | Clostridiales      | 45.2 | 2.32 |
| Sample_C11B_bin.35 | 87.42  | 0.19 | 60  | 41.1 | Lachnospiraceae    | 41.1 | 2.23 |
| Sample_C11B_bin.34 | 100.00 | 0.48 | 50  | 54.8 | Bacteroidetes      | 54.8 | 2.77 |
| Sample_C11B_bin.39 | 97.30  | 0.84 | 91  | 34.2 | Bacteria           | 34.2 | 2.10 |
| Sample_C13A_bin.27 | 84.50  | 0.67 | 295 | 51.6 | Clostridiales      | 51.6 | 1.88 |
| Sample_C8A_bin.28  | 85.36  | 4.67 | 489 | 47.6 | Lachnospiraceae    | 47.6 | 2.47 |
| Sample_C13A_bin.25 | 93.44  | 1.24 | 133 | 48.9 | Bacteroidales      | 48.9 | 3.36 |
| Sample_C8A_bin.29  | 99.60  | 0.55 | 134 | 50.9 | Enterobacteriaceae | 50.9 | 4.32 |
| Sample_C6C_bin.38  | 97.98  | 0.00 | 31  | 37.4 | Clostridiales      | 37.4 | 2.72 |

|                    |        |      |     |      |                    |      |      |
|--------------------|--------|------|-----|------|--------------------|------|------|
| Sample_C6C_bin.33  | 81.26  | 1.89 | 194 | 33.5 | Bacteria           | 33.5 | 1.79 |
| Sample_C6C_bin.32  | 96.72  | 1.34 | 253 | 40.7 | Bacteroidales      | 40.7 | 3.11 |
| Sample_C14B_bin.23 | 95.12  | 0.48 | 100 | 41.8 | Lachnospiraceae    | 41.8 | 3.26 |
| Sample_C14B_bin.22 | 99.44  | 0.24 | 93  | 49.5 | Lachnospiraceae    | 49.5 | 2.99 |
| Sample_C6C_bin.36  | 99.32  | 0.00 | 23  | 41.3 | Clostridiales      | 41.3 | 2.64 |
| Sample_C6C_bin.35  | 97.46  | 1.27 | 76  | 41.9 | Clostridiales      | 41.9 | 2.83 |
| Sample_C13A_bin.22 | 92.87  | 0.53 | 213 | 47.1 | Clostridiales      | 47.1 | 2.82 |
| Sample_C11A_bin.2  | 98.55  | 1.93 | 212 | 41.8 | Lachnospiraceae    | 41.8 | 2.89 |
| Sample_C11A_bin.3  | 97.27  | 1.19 | 53  | 47.4 | Bacteroidales      | 47.4 | 2.76 |
| Sample_C11A_bin.1  | 97.76  | 1.45 | 634 | 36   | Clostridiales      | 36   | 2.39 |
| Sample_C11A_bin.6  | 97.98  | 2.50 | 254 | 38.1 | Clostridiales      | 38.1 | 3.11 |
| Sample_C11A_bin.5  | 85.42  | 0.42 | 408 | 47.5 | Bacteroidales      | 47.5 | 3.47 |
| Sample_C11A_bin.8  | 100.00 | 0.76 | 91  | 44.4 | Clostridiales      | 44.4 | 2.80 |
| Sample_C1C_bin.34  | 98.30  | 0.00 | 58  | 41.9 | Clostridiales      | 41.9 | 2.76 |
| Sample_C1C_bin.35  | 99.51  | 2.72 | 33  | 54.3 | Bacteroidetes      | 54.3 | 2.22 |
| Sample_C1C_bin.36  | 99.44  | 0.97 | 55  | 49.4 | Lachnospiraceae    | 49.4 | 3.11 |
| Sample_C1C_bin.37  | 93.58  | 3.61 | 219 | 43.1 | Lachnospiraceae    | 43.1 | 2.17 |
| Sample_C1C_bin.30  | 90.14  | 1.42 | 144 | 60.3 | Clostridiales      | 60.3 | 2.06 |
| Sample_C1C_bin.31  | 98.77  | 0.38 | 74  | 42.1 | Bacteroidales      | 42.1 | 4.55 |
| Sample_C1C_bin.32  | 88.53  | 0.00 | 54  | 40.2 | Bacteroidales      | 40.2 | 2.91 |
| Sample_C1C_bin.33  | 90.15  | 0.97 | 48  | 41.5 | Lachnospiraceae    | 41.5 | 2.78 |
| Sample_C1C_bin.38  | 97.84  | 0.00 | 44  | 51   | Bacteria           | 51   | 1.92 |
| Sample_C3A_bin.17  | 88.70  | 3.08 | 287 | 57   | Clostridiales      | 57   | 2.14 |
| Sample_T6A_bin.29  | 97.57  | 1.09 | 417 | 51   | Enterobacteriaceae | 51   | 4.57 |
| Sample_C2A_bin.29  | 96.83  | 1.27 | 85  | 44.5 | Clostridiales      | 44.5 | 2.73 |
| Sample_T16B_bin.15 | 94.29  | 1.51 | 211 | 38.2 | Clostridiales      | 38.2 | 2.37 |
| Sample_T16B_bin.14 | 96.64  | 1.47 | 169 | 36.8 | Clostridiales      | 36.8 | 3.20 |
| Sample_T16B_bin.17 | 100.00 | 0.00 | 81  | 44.5 | Clostridiales      | 44.5 | 2.87 |
| Sample_T16B_bin.16 | 98.65  | 1.34 | 38  | 36.3 | Clostridiales      | 36.3 | 2.51 |
| Sample_T16B_bin.18 | 85.14  | 2.14 | 215 | 45.5 | Lachnospiraceae    | 45.5 | 2.22 |
| Sample_T6A_bin.21  | 97.43  | 0.00 | 225 | 48.4 | Bacteroidales      | 48.4 | 3.78 |
| Sample_T6A_bin.20  | 90.38  | 0.69 | 161 | 62.1 | Clostridiales      | 62.1 | 1.86 |
| Sample_T6A_bin.26  | 99.30  | 1.17 | 96  | 57.6 | Clostridiales      | 57.6 | 3.28 |
| Sample_C2A_bin.24  | 98.65  | 1.01 | 38  | 40.3 | Clostridiales      | 40.3 | 2.19 |
| Sample_T6A_bin.24  | 98.65  | 0.00 | 307 | 36.1 | Clostridiales      | 36.1 | 2.67 |
| Sample_C4B_bin.10  | 90.40  | 2.00 | 92  | 48.6 | Proteobacteria     | 48.6 | 2.39 |
| Sample_C4A_bin.36  | 98.65  | 0.00 | 52  | 40.5 | Clostridiales      | 40.5 | 2.75 |
| Sample_C4A_bin.35  | 81.43  | 0.78 | 449 | 48.8 | Proteobacteria     | 48.8 | 2.11 |
| Sample_C4A_bin.34  | 97.95  | 0.00 | 91  | 58.2 | Bacteria           | 58.2 | 3.00 |

|                    |       |      |     |      |                    |      |      |
|--------------------|-------|------|-----|------|--------------------|------|------|
| Sample_C4A_bin.33  | 98.83 | 1.17 | 43  | 58.1 | Clostridiales      | 58.1 | 3.01 |
| Sample_C4A_bin.32  | 98.63 | 0.00 | 79  | 37.3 | Clostridiales      | 37.3 | 2.68 |
| Sample_C4A_bin.31  | 92.93 | 1.45 | 26  | 44.3 | Clostridiales      | 44.3 | 2.91 |
| Sample_C4A_bin.30  | 95.97 | 0.89 | 235 | 36.2 | Clostridiales      | 36.2 | 2.36 |
| Sample_T3B_bin.4   | 99.19 | 0.81 | 63  | 59.8 | Actinobacteria     | 59.8 | 2.42 |
| Sample_T3B_bin.5   | 97.47 | 0.85 | 98  | 57.5 | Clostridiales      | 57.5 | 2.36 |
| Sample_T3B_bin.6   | 90.44 | 1.08 | 74  | 60.3 | Clostridiales      | 60.3 | 1.87 |
| Sample_T3B_bin.7   | 93.28 | 0.89 | 76  | 61.6 | Clostridiales      | 61.6 | 1.98 |
| Sample_C4A_bin.39  | 91.19 | 4.25 | 72  | 61.6 | Clostridiales      | 61.6 | 2.03 |
| Sample_C4A_bin.38  | 98.11 | 0.00 | 26  | 43.3 | Bacteroidales      | 43.3 | 3.04 |
| Sample_C4B_bin.29  | 86.20 | 2.04 | 122 | 59   | Clostridiales      | 59   | 1.99 |
| Sample_T11B_bin.34 | 94.64 | 2.02 | 114 | 56.6 | Bifidobacteriaceae | 56.6 | 2.05 |
| Sample_T11B_bin.35 | 94.38 | 0.22 | 91  | 42   | Bacteroidales      | 42   | 4.19 |
| Sample_C4B_bin.21  | 84.11 | 0.67 | 210 | 59.3 | Clostridiales      | 59.3 | 1.68 |
| Sample_C4B_bin.20  | 97.83 | 0.53 | 90  | 49.4 | Lachnospiraceae    | 49.4 | 3.10 |
| Sample_C4B_bin.22  | 90.61 | 1.36 | 100 | 60.8 | Clostridiales      | 60.8 | 2.21 |
| Sample_C4B_bin.25  | 99.32 | 0.67 | 31  | 43.9 | Clostridiales      | 43.9 | 2.92 |
| Sample_C4B_bin.24  | 97.92 | 2.85 | 19  | 44.7 | Clostridiales      | 44.7 | 3.09 |
| Sample_C4B_bin.27  | 90.19 | 1.95 | 201 | 47.3 | Bacteroidales      | 47.3 | 3.77 |
| Sample_T11B_bin.37 | 92.00 | 0.60 | 338 | 48.8 | Bacteroidales      | 48.8 | 3.20 |
| Sample_C8A_bin.4   | 97.91 | 2.61 | 59  | 43.4 | Lachnospiraceae    | 43.4 | 2.99 |
| Sample_T11B_bin.30 | 91.79 | 0.37 | 96  | 40.4 | Bacteroidales      | 40.4 | 3.03 |
| Sample_C3A_bin.19  | 81.54 | 2.47 | 375 | 43.6 | Clostridiales      | 43.6 | 2.28 |
| Sample_C1A_bin.4   | 97.98 | 0.67 | 266 | 44.5 | Clostridiales      | 44.5 | 1.91 |
| Sample_C3A_bin.29  | 86.78 | 3.79 | 324 | 58.6 | Clostridia         | 58.6 | 2.38 |
| Sample_T2C_bin.18  | 99.35 | 0.24 | 66  | 41.8 | Lachnospiraceae    | 41.8 | 2.59 |
| Sample_T2C_bin.19  | 99.25 | 0.19 | 71  | 48.2 | Bacteroidales      | 48.2 | 4.40 |
| Sample_T2C_bin.10  | 89.73 | 3.99 | 288 | 59.6 | Clostridiales      | 59.6 | 1.84 |
| Sample_C8B_bin.43  | 94.84 | 0.54 | 48  | 41.5 | Lachnospiraceae    | 41.5 | 2.93 |
| Sample_T13B_bin.41 | 98.38 | 0.19 | 233 | 45.8 | Actinobacteria     | 45.8 | 2.11 |
| Sample_T2C_bin.14  | 98.90 | 0.00 | 47  | 36.7 | Clostridiales      | 36.7 | 3.05 |
| Sample_T2C_bin.15  | 95.48 | 4.11 | 54  | 44.9 | Lachnospiraceae    | 44.9 | 2.70 |
| Sample_C8B_bin.42  | 92.72 | 0.63 | 82  | 49.3 | Clostridiales      | 49.3 | 2.39 |
| Sample_C4C_bin.18  | 97.28 | 2.17 | 46  | 43.7 | Lachnospiraceae    | 43.7 | 2.80 |
| Sample_C4C_bin.17  | 89.04 | 0.11 | 55  | 26.6 | Bacteria           | 26.6 | 1.07 |
| Sample_C4C_bin.16  | 96.47 | 2.10 | 231 | 43.9 | Selenomonadales    | 43.9 | 2.25 |
| Sample_C8B_bin.40  | 94.21 | 3.82 | 150 | 59.3 | Clostridiales      | 59.3 | 1.92 |
| Sample_C4C_bin.13  | 96.30 | 0.00 | 62  | 50.3 | Clostridiales      | 50.3 | 2.33 |
| Sample_C4C_bin.12  | 97.32 | 0.68 | 205 | 56.7 | Clostridiales      | 56.7 | 2.23 |

|                    |        |      |     |      |                    |      |      |
|--------------------|--------|------|-----|------|--------------------|------|------|
| Sample_C4C_bin.10  | 99.30  | 1.17 | 86  | 58   | Clostridiales      | 58   | 3.21 |
| Sample_T2B_bin.53  | 97.27  | 1.36 | 115 | 56.4 | Clostridiales      | 56.4 | 2.50 |
| Sample_T2B_bin.52  | 91.83  | 1.53 | 239 | 60.5 | Clostridiales      | 60.5 | 2.01 |
| Sample_T2B_bin.51  | 86.66  | 0.98 | 71  | 42.9 | Lachnospiraceae    | 42.9 | 1.84 |
| Sample_C7A_bin.29  | 97.98  | 0.00 | 25  | 47.8 | Clostridiales      | 47.8 | 2.16 |
| Sample_C7A_bin.28  | 97.31  | 1.01 | 68  | 56.7 | Clostridiales      | 56.7 | 2.79 |
| Sample_C7A_bin.27  | 84.81  | 0.00 | 39  | 62.4 | Clostridiales      | 62.4 | 1.69 |
| Sample_C7A_bin.25  | 100.00 | 2.35 | 124 | 45   | Bacteria           | 45   | 3.75 |
| Sample_C7A_bin.24  | 85.29  | 0.22 | 37  | 52.6 | Clostridiales      | 52.6 | 1.95 |
| Sample_C7A_bin.22  | 95.89  | 0.00 | 278 | 40.9 | Bacteroidales      | 40.9 | 3.06 |
| Sample_C7A_bin.21  | 99.30  | 1.17 | 92  | 57.9 | Clostridiales      | 57.9 | 3.11 |
| Sample_C3A_bin.49  | 99.77  | 0.74 | 93  | 50.7 | Enterobacteriaceae | 50.7 | 4.75 |
| Sample_T18A_bin.9  | 100.00 | 0.00 | 40  | 63.5 | Actinobacteria     | 63.5 | 2.80 |
| Sample_C1A_bin.20  | 97.27  | 0.68 | 219 | 56.5 | Clostridiales      | 56.5 | 2.32 |
| Sample_C3A_bin.41  | 88.71  | 0.00 | 23  | 42.7 | Bacteroidales      | 42.7 | 4.84 |
| Sample_T18A_bin.1  | 97.59  | 0.96 | 21  | 54.5 | Bacteroidetes      | 54.5 | 2.27 |
| Sample_C3A_bin.43  | 91.27  | 3.36 | 84  | 46.9 | Clostridiales      | 46.9 | 2.03 |
| Sample_C3A_bin.42  | 94.40  | 0.00 | 149 | 44.5 | Clostridiales      | 44.5 | 2.11 |
| Sample_T18A_bin.4  | 96.82  | 4.35 | 34  | 43.7 | Lachnospiraceae    | 43.7 | 2.81 |
| Sample_T13A_bin.14 | 81.03  | 3.45 | 99  | 42.1 | Bacteria           | 42.1 | 3.69 |
| Sample_C3A_bin.46  | 85.57  | 3.02 | 307 | 58.4 | Clostridiales      | 58.4 | 1.78 |
| Sample_T4C_bin.34  | 83.68  | 0.95 | 30  | 41.2 | Clostridiales      | 41.2 | 2.83 |
| Sample_T4C_bin.37  | 98.12  | 0.00 | 37  | 57.1 | Proteobacteria     | 57.1 | 2.48 |
| Sample_T4C_bin.32  | 93.95  | 1.34 | 468 | 61.9 | Clostridiales      | 61.9 | 2.03 |
| Sample_C7B_bin.36  | 89.93  | 2.89 | 31  | 57   | Clostridiales      | 57   | 2.25 |
| Sample_T4C_bin.38  | 98.61  | 0.72 | 46  | 49.4 | Lachnospiraceae    | 49.4 | 2.99 |
| Sample_T4C_bin.39  | 94.79  | 0.87 | 83  | 46.6 | Bacteroidales      | 46.6 | 4.20 |
| Sample_C5C_bin.8   | 92.17  | 0.19 | 192 | 45.7 | Bacteroidales      | 45.7 | 3.86 |
| Sample_T12B_bin.28 | 98.14  | 0.00 | 70  | 41.5 | Lachnospiraceae    | 41.5 | 2.87 |
| Sample_T12B_bin.29 | 98.07  | 0.96 | 37  | 54.5 | Bacteroidetes      | 54.5 | 2.17 |
| Sample_C7B_bin.15  | 98.99  | 0.13 | 190 | 43.4 | Bacteroidales      | 43.4 | 3.05 |
| Sample_C7B_bin.12  | 98.30  | 0.00 | 231 | 49.8 | Bacteroidales      | 49.8 | 2.52 |
| Sample_C7B_bin.11  | 96.83  | 0.63 | 46  | 31.4 | Firmicutes         | 31.4 | 2.55 |
| Sample_C7B_bin.10  | 80.61  | 2.53 | 161 | 42.4 | Clostridiales      | 42.4 | 1.98 |
| Sample_T12B_bin.21 | 98.73  | 0.02 | 109 | 48.6 | Firmicutes         | 48.6 | 2.04 |
| Sample_T12B_bin.24 | 97.82  | 0.04 | 192 | 55.6 | Proteobacteria     | 55.6 | 2.70 |
| Sample_T12B_bin.25 | 95.16  | 4.83 | 51  | 43.8 | Lachnospiraceae    | 43.8 | 2.69 |
| Sample_C7B_bin.19  | 86.70  | 2.48 | 277 | 47   | Clostridiales      | 47   | 2.31 |
| Sample_T12B_bin.27 | 96.83  | 0.63 | 74  | 31.7 | Firmicutes         | 31.7 | 2.23 |

|                    |        |      |     |      |                    |      |      |
|--------------------|--------|------|-----|------|--------------------|------|------|
| Sample_T1A_bin.1   | 83.27  | 3.03 | 120 | 40.8 | Bacteroidales      | 40.8 | 2.71 |
| Sample_T1A_bin.2   | 90.75  | 1.66 | 201 | 44.9 | Bacteroidales      | 44.9 | 3.38 |
| Sample_T1A_bin.4   | 99.36  | 1.69 | 103 | 43.9 | Clostridiales      | 43.9 | 3.60 |
| Sample_T1A_bin.7   | 99.03  | 0.74 | 114 | 41.6 | Lachnospiraceae    | 41.6 | 2.77 |
| Sample_T1A_bin.6   | 98.65  | 1.52 | 97  | 57.2 | Enterobacteriaceae | 57.2 | 5.50 |
| Sample_T1A_bin.9   | 100.00 | 1.27 | 130 | 31.3 | Firmicutes         | 31.3 | 2.38 |
| Sample_C2A_bin.54  | 98.24  | 0.00 | 86  | 41.8 | Lachnospiraceae    | 41.8 | 2.71 |
| Sample_T4A_bin.24  | 86.93  | 0.19 | 496 | 41.1 | Lachnospiraceae    | 41.1 | 2.31 |
| Sample_T4A_bin.26  | 98.65  | 0.00 | 95  | 45.9 | Clostridiales      | 45.9 | 2.58 |
| Sample_T4A_bin.21  | 97.33  | 1.43 | 29  | 41.8 | Bacteroides        | 41.8 | 6.10 |
| Sample_T4A_bin.23  | 93.28  | 0.00 | 251 | 61.9 | Clostridiales      | 61.9 | 2.04 |
| Sample_T4A_bin.22  | 97.31  | 0.00 | 33  | 52.9 | Clostridiales      | 52.9 | 2.09 |
| Sample_C9A_bin.36  | 93.13  | 0.17 | 97  | 59.8 | Clostridiales      | 59.8 | 2.00 |
| Sample_C9A_bin.37  | 99.32  | 1.01 | 19  | 40.9 | Clostridiales      | 40.9 | 2.11 |
| Sample_C9A_bin.34  | 95.32  | 0.00 | 49  | 41.8 | Lachnospiraceae    | 41.8 | 2.36 |
| Sample_C9A_bin.35  | 84.28  | 1.27 | 259 | 43.4 | Clostridiales      | 43.4 | 3.04 |
| Sample_T4A_bin.29  | 91.94  | 0.00 | 47  | 60.7 | Clostridiales      | 60.7 | 2.30 |
| Sample_T4A_bin.28  | 97.92  | 0.92 | 56  | 60.1 | Bifidobacteriaceae | 60.1 | 2.17 |
| Sample_C9A_bin.30  | 96.64  | 0.67 | 111 | 60.5 | Clostridiales      | 60.5 | 3.09 |
| Sample_C9A_bin.31  | 98.04  | 0.00 | 302 | 48.7 | Proteobacteria     | 48.7 | 2.41 |
| Sample_T18C_bin.14 | 99.32  | 1.01 | 25  | 40.5 | Clostridiales      | 40.5 | 2.23 |
| Sample_T18C_bin.15 | 95.88  | 1.58 | 178 | 44.2 | Clostridiales      | 44.2 | 3.14 |
| Sample_T18C_bin.16 | 83.24  | 0.88 | 227 | 42.5 | Bacteroidales      | 42.5 | 3.15 |
| Sample_T18C_bin.17 | 98.65  | 0.00 | 19  | 35.8 | Clostridiales      | 35.8 | 2.63 |
| Sample_T18C_bin.11 | 81.03  | 2.59 | 129 | 40.4 | Bacteria           | 40.4 | 3.31 |
| Sample_T18C_bin.12 | 91.04  | 0.16 | 75  | 46.2 | Bacteroidales      | 46.2 | 2.90 |
| Sample_T18C_bin.13 | 90.43  | 0.67 | 144 | 36.3 | Clostridiales      | 36.3 | 2.24 |
| Sample_T18C_bin.18 | 97.04  | 0.67 | 236 | 48.8 | Proteobacteria     | 48.8 | 2.30 |
| Sample_T18C_bin.19 | 98.55  | 0.72 | 73  | 41.5 | Lachnospiraceae    | 41.5 | 3.19 |
| Sample_T13B_bin.32 | 93.98  | 1.90 | 33  | 49.4 | Proteobacteria     | 49.4 | 2.02 |
| Sample_T13B_bin.33 | 86.54  | 0.00 | 86  | 41.6 | Lachnospiraceae    | 41.6 | 2.21 |
| Sample_T13B_bin.30 | 96.14  | 1.44 | 129 | 42   | Bacteroidales      | 42   | 4.66 |
| Sample_T13B_bin.31 | 84.76  | 0.45 | 182 | 56.8 | Bifidobacteriaceae | 56.8 | 1.69 |
| Sample_C5C_bin.16  | 98.97  | 1.84 | 62  | 43   | Lachnospiraceae    | 43   | 3.30 |
| Sample_T13B_bin.37 | 98.94  | 1.79 | 49  | 47.9 | Clostridiales      | 47.9 | 3.16 |
| Sample_C5C_bin.14  | 98.65  | 1.01 | 57  | 40.4 | Clostridiales      | 40.4 | 2.32 |
| Sample_C5C_bin.15  | 94.21  | 0.59 | 44  | 59   | Clostridiales      | 59   | 2.18 |
| Sample_C5C_bin.18  | 99.32  | 2.01 | 28  | 35.9 | Clostridiales      | 35.9 | 2.72 |
| Sample_C5C_bin.19  | 98.65  | 0.67 | 34  | 33.3 | Clostridiales      | 33.3 | 2.29 |

|                    |        |      |     |      |                    |      |      |
|--------------------|--------|------|-----|------|--------------------|------|------|
| Sample_T11C_bin.39 | 99.32  | 2.68 | 58  | 37   | Clostridiales      | 37   | 2.72 |
| Sample_T11C_bin.38 | 89.91  | 1.37 | 183 | 60.2 | Bifidobacteriaceae | 60.2 | 1.90 |
| Sample_T11C_bin.33 | 87.83  | 1.36 | 170 | 60   | Clostridiales      | 60   | 1.94 |
| Sample_T11C_bin.32 | 97.84  | 0.00 | 137 | 43.3 | Bacteria           | 43.3 | 4.05 |
| Sample_T11C_bin.30 | 85.37  | 2.89 | 65  | 57.7 | Clostridiales      | 57.7 | 1.90 |
| Sample_T11C_bin.37 | 100.00 | 2.50 | 45  | 56.7 | Bifidobacteriaceae | 56.7 | 2.08 |
| Sample_T11C_bin.36 | 100.00 | 0.81 | 90  | 60.1 | Actinobacteria     | 60.1 | 2.13 |
| Sample_T14B_bin.35 | 90.33  | 0.54 | 188 | 43.2 | Lachnospiraceae    | 43.2 | 2.01 |
| Sample_T14B_bin.37 | 99.32  | 0.67 | 27  | 40.4 | Clostridiales      | 40.4 | 2.25 |
| Sample_T14B_bin.36 | 96.66  | 0.01 | 148 | 43.5 | Bacteroidales      | 43.5 | 2.98 |
| Sample_T17C_bin.3  | 97.45  | 0.87 | 113 | 38.5 | Clostridiales      | 38.5 | 2.69 |
| Sample_T14B_bin.30 | 95.23  | 1.59 | 64  | 60.7 | Clostridiales      | 60.7 | 2.28 |
| Sample_T17C_bin.1  | 85.36  | 0.00 | 88  | 44.3 | Clostridiales      | 44.3 | 3.06 |
| Sample_T12A_bin.25 | 83.97  | 1.72 | 545 | 43.6 | Bacteria           | 43.6 | 2.80 |
| Sample_T12A_bin.24 | 97.31  | 0.00 | 72  | 41   | Clostridiales      | 41   | 2.61 |
| Sample_T12A_bin.27 | 82.20  | 0.90 | 320 | 46.5 | Bacteroidales      | 46.5 | 2.97 |
| Sample_T12A_bin.26 | 98.55  | 1.62 | 44  | 46   | Lachnospiraceae    | 46   | 2.96 |
| Sample_T14B_bin.39 | 99.51  | 1.46 | 71  | 53.3 | Bacteroidetes      | 53.3 | 3.07 |
| Sample_T12A_bin.20 | 94.18  | 1.34 | 142 | 45   | Clostridiales      | 45   | 2.42 |
| Sample_T17C_bin.9  | 99.16  | 0.28 | 45  | 44.1 | Bacteroidales      | 44.1 | 3.77 |
| Sample_T12A_bin.22 | 95.86  | 1.84 | 21  | 46.3 | Bacteroidetes      | 46.3 | 2.20 |
| Sample_T12C_bin.17 | 97.30  | 0.84 | 79  | 33.3 | Bacteria           | 33.3 | 2.23 |
| Sample_T12C_bin.15 | 98.65  | 0.34 | 59  | 38.6 | Clostridiales      | 38.6 | 2.19 |
| Sample_T12C_bin.12 | 98.65  | 0.00 | 72  | 38   | Clostridiales      | 38   | 2.00 |
| Sample_T12C_bin.10 | 97.46  | 0.02 | 24  | 48.6 | Firmicutes         | 48.6 | 2.03 |
| Sample_C2A_bin.45  | 89.38  | 1.70 | 262 | 56.6 | Clostridiales      | 56.6 | 2.24 |
| Sample_T12C_bin.18 | 99.51  | 1.44 | 28  | 54.1 | Bacteroidetes      | 54.1 | 2.34 |
| Sample_T16C_bin.5  | 97.31  | 0.34 | 25  | 44.3 | Clostridiales      | 44.3 | 2.07 |
| Sample_T5B_bin.19  | 90.33  | 0.17 | 105 | 59   | Clostridiales      | 59   | 2.00 |
| Sample_T5B_bin.14  | 90.24  | 1.34 | 175 | 42.3 | Clostridiales      | 42.3 | 2.33 |
| Sample_T5B_bin.15  | 98.05  | 1.96 | 309 | 44.9 | Bacteroidales      | 44.9 | 4.52 |
| Sample_T5B_bin.16  | 82.73  | 0.74 | 53  | 46.1 | Bacteroidales      | 46.1 | 3.05 |
| Sample_T5B_bin.17  | 99.44  | 0.24 | 73  | 49.4 | Lachnospiraceae    | 49.4 | 3.12 |
| Sample_T5B_bin.10  | 97.31  | 0.00 | 50  | 53.4 | Clostridiales      | 53.4 | 1.92 |
| Sample_T5B_bin.12  | 95.23  | 1.90 | 147 | 43.3 | Clostridiales      | 43.3 | 2.91 |
| Sample_T5B_bin.13  | 99.32  | 1.01 | 34  | 40.6 | Clostridiales      | 40.6 | 2.24 |
| Sample_C2C_bin.22  | 92.17  | 0.67 | 256 | 45.3 | Clostridiales      | 45.3 | 1.77 |
| Sample_C2C_bin.24  | 90.83  | 1.68 | 101 | 47.2 | Clostridiales      | 47.2 | 2.24 |
| Sample_T10B_bin.11 | 97.30  | 1.18 | 72  | 40.7 | Bacteroidales      | 40.7 | 3.10 |

|                    |       |      |     |      |                    |      |      |
|--------------------|-------|------|-----|------|--------------------|------|------|
| Sample_C6C_bin.24  | 88.59 | 1.45 | 26  | 47.7 | Lachnospiraceae    | 47.7 | 2.52 |
| Sample_C14B_bin.18 | 97.12 | 2.66 | 51  | 43.5 | Lachnospiraceae    | 43.5 | 2.94 |
| Sample_C6C_bin.29  | 99.03 | 1.33 | 70  | 42.7 | Lachnospiraceae    | 42.7 | 3.43 |
| Sample_C14B_bin.14 | 92.13 | 0.84 | 34  | 40.8 | Bacteroidales      | 40.8 | 3.09 |
| Sample_C6C_bin.25  | 86.90 | 1.57 | 164 | 62.5 | Clostridiales      | 62.5 | 1.52 |
| Sample_C14B_bin.16 | 98.41 | 0.00 | 85  | 44.6 | Clostridiales      | 44.6 | 2.64 |
| Sample_C14B_bin.10 | 98.65 | 0.67 | 48  | 36.3 | Clostridiales      | 36.3 | 2.60 |
| Sample_C6C_bin.21  | 97.98 | 0.00 | 250 | 52   | Clostridiales      | 52   | 2.43 |
| Sample_C6C_bin.22  | 80.80 | 2.97 | 198 | 60.1 | Clostridiales      | 60.1 | 2.01 |
| Sample_C14B_bin.11 | 99.31 | 0.68 | 268 | 57.5 | Clostridiales      | 57.5 | 2.53 |
| Sample_C14B_bin.12 | 87.85 | 2.43 | 168 | 49.7 | Clostridiales      | 49.7 | 2.08 |
| Sample_T6C_bin.44  | 83.86 | 0.00 | 368 | 45.3 | Clostridiales      | 45.3 | 2.31 |
| Sample_T6C_bin.43  | 97.92 | 0.00 | 70  | 50   | Bacteroidales      | 50   | 2.56 |
| Sample_T6C_bin.42  | 84.41 | 1.35 | 52  | 49   | Lachnospiraceae    | 49   | 2.44 |
| Sample_T6C_bin.41  | 90.15 | 0.34 | 281 | 42.4 | Clostridiales      | 42.4 | 2.40 |
| Sample_T14A_bin.28 | 98.65 | 0.34 | 73  | 33.7 | Clostridiales      | 33.7 | 2.14 |
| Sample_T3A_bin.7   | 95.77 | 1.05 | 59  | 46.1 | Bacteroidales      | 46.1 | 4.32 |
| Sample_T3A_bin.6   | 92.92 | 0.85 | 100 | 60.5 | Clostridiales      | 60.5 | 2.18 |
| Sample_T3A_bin.5   | 91.79 | 0.79 | 223 | 49.8 | Clostridiales      | 49.8 | 2.49 |
| Sample_T3A_bin.4   | 80.27 | 0.96 | 62  | 61.6 | Clostridiales      | 61.6 | 1.95 |
| Sample_T3A_bin.3   | 96.03 | 2.38 | 41  | 58.1 | Clostridiales      | 58.1 | 2.39 |
| Sample_T7C_bin.14  | 94.89 | 1.53 | 265 | 59.7 | Clostridiales      | 59.7 | 2.68 |
| Sample_T3A_bin.1   | 87.53 | 2.31 | 100 | 55.4 | Proteobacteria     | 55.4 | 2.06 |
| Sample_T16B_bin.23 | 95.94 | 2.30 | 320 | 44.2 | Selenomonadales    | 44.2 | 2.12 |
| Sample_T6A_bin.34  | 96.23 | 0.00 | 208 | 40.7 | Clostridiales      | 40.7 | 2.57 |
| Sample_T6A_bin.35  | 97.16 | 0.00 | 35  | 50   | Bacteroidales      | 50   | 2.54 |
| Sample_T6A_bin.36  | 93.63 | 2.82 | 136 | 44   | Lachnospiraceae    | 44   | 2.43 |
| Sample_T16B_bin.28 | 96.01 | 0.85 | 72  | 43   | Lachnospiraceae    | 43   | 3.24 |
| Sample_C2A_bin.12  | 96.00 | 4.67 | 163 | 27.3 | Bacteria           | 27.3 | 1.20 |
| Sample_T3A_bin.9   | 95.54 | 2.04 | 104 | 60.2 | Clostridiales      | 60.2 | 2.01 |
| Sample_T6A_bin.33  | 98.73 | 0.02 | 108 | 48.5 | Firmicutes         | 48.5 | 2.04 |
| Sample_C11B_bin.18 | 95.75 | 2.09 | 204 | 50.6 | Enterobacteriaceae | 50.6 | 4.56 |
| Sample_C11B_bin.11 | 90.51 | 0.67 | 121 | 62.3 | Clostridiales      | 62.3 | 1.81 |
| Sample_T12C_bin.22 | 96.72 | 2.98 | 77  | 59.5 | Clostridiales      | 59.5 | 2.36 |
| Sample_C11B_bin.12 | 95.68 | 0.32 | 199 | 44.1 | Clostridiales      | 44.1 | 3.35 |
| Sample_C11B_bin.14 | 98.13 | 0.62 | 198 | 62.3 | Proteobacteria     | 62.3 | 2.46 |
| Sample_C11B_bin.17 | 94.63 | 0.00 | 24  | 38   | Clostridiales      | 38   | 1.86 |
| Sample_C11B_bin.16 | 97.59 | 1.44 | 33  | 54.6 | Bacteroidetes      | 54.6 | 2.14 |
| Sample_C14C_bin.13 | 92.50 | 1.15 | 111 | 45.6 | Bacteroidales      | 45.6 | 3.80 |

|                    |        |      |     |      |                    |      |      |
|--------------------|--------|------|-----|------|--------------------|------|------|
| Sample_C14C_bin.12 | 94.20  | 1.26 | 317 | 50.6 | Enterobacteriaceae | 50.6 | 4.45 |
| Sample_C14C_bin.11 | 82.75  | 0.00 | 544 | 27.1 | Bacteria           | 27.1 | 2.67 |
| Sample_C14C_bin.10 | 99.30  | 0.00 | 220 | 41.2 | Clostridiales      | 41.2 | 2.52 |
| Sample_C14C_bin.17 | 97.67  | 1.27 | 54  | 47.8 | Clostridiales      | 47.8 | 3.12 |
| Sample_C8B_bin.11  | 89.88  | 2.74 | 279 | 49.9 | Clostridiales      | 49.9 | 2.31 |
| Sample_C8B_bin.12  | 99.32  | 0.00 | 21  | 35.9 | Clostridiales      | 35.9 | 2.58 |
| Sample_C8B_bin.13  | 84.34  | 0.69 | 295 | 48.5 | Clostridiales      | 48.5 | 2.56 |
| Sample_C4A_bin.21  | 95.70  | 1.01 | 188 | 36.4 | Clostridiales      | 36.4 | 2.46 |
| Sample_C4A_bin.22  | 89.59  | 0.00 | 61  | 58.3 | Clostridiales      | 58.3 | 2.06 |
| Sample_C4A_bin.23  | 89.26  | 1.01 | 30  | 56.4 | Clostridiales      | 56.4 | 2.37 |
| Sample_C4A_bin.24  | 97.27  | 0.00 | 29  | 51.8 | Clostridiales      | 51.8 | 2.25 |
| Sample_C4A_bin.25  | 90.38  | 0.48 | 23  | 54.6 | Bacteroidetes      | 54.6 | 2.06 |
| Sample_T1C_bin.4   | 98.30  | 0.53 | 31  | 41.6 | Lachnospiraceae    | 41.6 | 2.76 |
| Sample_C4B_bin.38  | 95.10  | 2.42 | 51  | 43.6 | Lachnospiraceae    | 43.6 | 2.71 |
| Sample_T17A_bin.9  | 91.50  | 0.00 | 388 | 45   | Bacteria           | 45   | 3.59 |
| Sample_T17A_bin.8  | 97.88  | 1.10 | 71  | 50.6 | Enterobacteriaceae | 50.6 | 4.75 |
| Sample_T17A_bin.5  | 98.65  | 0.90 | 75  | 45   | Bacteroidales      | 45   | 4.44 |
| Sample_T17A_bin.4  | 97.37  | 0.00 | 39  | 44.3 | Clostridiales      | 44.3 | 2.64 |
| Sample_T17A_bin.6  | 87.33  | 1.57 | 277 | 33.7 | Clostridiales      | 33.7 | 1.88 |
| Sample_T17A_bin.1  | 92.39  | 2.92 | 67  | 43.3 | Lachnospiraceae    | 43.3 | 2.79 |
| Sample_C4B_bin.37  | 96.46  | 2.04 | 241 | 56.5 | Clostridiales      | 56.5 | 2.40 |
| Sample_C7C_bin.18  | 100.00 | 0.81 | 43  | 59.8 | Actinobacteria     | 59.8 | 2.25 |
| Sample_C7C_bin.19  | 99.51  | 1.45 | 60  | 41.2 | Lachnospiraceae    | 41.2 | 3.14 |
| Sample_C7C_bin.10  | 96.22  | 0.02 | 115 | 50.1 | Bacteroidales      | 50.1 | 2.42 |
| Sample_C7C_bin.11  | 85.24  | 3.34 | 30  | 58.8 | Clostridiales      | 58.8 | 2.23 |
| Sample_C7C_bin.12  | 97.98  | 0.67 | 167 | 33.2 | Clostridiales      | 33.2 | 2.22 |
| Sample_C7C_bin.13  | 98.73  | 2.53 | 57  | 31.1 | Firmicutes         | 31.1 | 2.56 |
| Sample_C7C_bin.15  | 96.30  | 0.41 | 136 | 36.3 | Clostridiales      | 36.3 | 2.49 |
| Sample_C7C_bin.16  | 98.64  | 3.31 | 91  | 45   | Prevotella         | 45   | 3.53 |
| Sample_C13C_bin.22 | 96.44  | 0.37 | 118 | 46.7 | Bacteroidales      | 46.7 | 4.02 |
| Sample_C14A_bin.18 | 96.31  | 2.50 | 50  | 54.5 | Bacteroidetes      | 54.5 | 2.32 |
| Sample_T11A_bin.23 | 99.36  | 0.32 | 24  | 44.7 | Clostridiales      | 44.7 | 2.89 |
| Sample_C9C_bin.6   | 97.58  | 2.58 | 57  | 46.7 | Lachnospiraceae    | 46.7 | 3.49 |
| Sample_C2B_bin.17  | 80.05  | 1.12 | 79  | 26.9 | Bacteria           | 26.9 | 1.05 |
| Sample_C7A_bin.8   | 84.35  | 0.48 | 492 | 43.5 | Bacteroidales      | 43.5 | 2.67 |
| Sample_C7A_bin.9   | 98.63  | 0.68 | 111 | 42.5 | Clostridiales      | 42.5 | 3.08 |
| Sample_C7A_bin.2   | 97.31  | 0.00 | 83  | 43.6 | Clostridiales      | 43.6 | 2.09 |
| Sample_C7A_bin.3   | 99.36  | 1.27 | 155 | 43.9 | Clostridiales      | 43.9 | 3.21 |
| Sample_C7A_bin.4   | 98.78  | 2.69 | 180 | 43.5 | Selenomonadales    | 43.5 | 2.47 |



|                    |        |      |     |      |                 |      |      |
|--------------------|--------|------|-----|------|-----------------|------|------|
| Sample_C7A_bin.6   | 100.00 | 1.58 | 158 | 31.2 | Firmicutes      | 31.2 | 2.47 |
| Sample_C7A_bin.7   | 81.82  | 3.51 | 124 | 58.4 | Clostridiales   | 58.4 | 2.06 |
| Sample_T11A_bin.25 | 97.75  | 0.22 | 97  | 47.8 | Clostridiales   | 47.8 | 2.09 |
| Sample_T2B_bin.44  | 88.18  | 3.06 | 35  | 44.2 | Clostridiales   | 44.2 | 2.82 |
| Sample_T2B_bin.46  | 95.79  | 1.22 | 106 | 44.9 | Lachnospiraceae | 44.9 | 2.59 |
| Sample_T2B_bin.47  | 97.98  | 0.00 | 101 | 46   | Clostridiales   | 46   | 2.29 |
| Sample_T2B_bin.40  | 99.51  | 1.77 | 155 | 41.1 | Lachnospiraceae | 41.1 | 2.78 |
| Sample_T2B_bin.41  | 89.17  | 2.01 | 50  | 49.5 | Clostridiales   | 49.5 | 1.85 |
| Sample_T2B_bin.43  | 97.98  | 0.00 | 300 | 36.7 | Clostridiales   | 36.7 | 3.09 |
| Sample_T14A_bin.50 | 95.77  | 1.24 | 171 | 46.8 | Bacteroidales   | 46.8 | 3.97 |
| Sample_C7A_bin.30  | 93.32  | 2.35 | 112 | 57.9 | Clostridiales   | 57.9 | 2.12 |
| Sample_C7A_bin.32  | 97.46  | 0.02 | 292 | 48.4 | Firmicutes      | 48.4 | 2.13 |
| Sample_C3A_bin.59  | 90.45  | 0.87 | 136 | 46.9 | Bacteroidales   | 46.9 | 3.83 |
| Sample_C7A_bin.34  | 80.99  | 0.67 | 115 | 33.3 | Clostridiales   | 33.3 | 1.90 |
| Sample_C7A_bin.36  | 95.10  | 1.53 | 295 | 54.3 | Proteobacteria  | 54.3 | 2.15 |
| Sample_T13A_bin.24 | 92.29  | 0.85 | 345 | 56.1 | Clostridiales   | 56.1 | 2.63 |
| Sample_T13A_bin.25 | 99.02  | 0.13 | 112 | 36.6 | Lactobacillus   | 36.6 | 2.09 |
| Sample_T13A_bin.26 | 99.27  | 0.00 | 109 | 52.2 | Firmicutes      | 52.2 | 2.60 |
| Sample_C3A_bin.51  | 98.38  | 2.04 | 50  | 46.2 | Lachnospiraceae | 46.2 | 3.08 |
| Sample_C3A_bin.56  | 85.11  | 1.23 | 381 | 38.4 | Clostridiales   | 38.4 | 2.11 |
| Sample_C3A_bin.57  | 97.95  | 0.68 | 106 | 58.1 | Clostridiales   | 58.1 | 3.40 |
| Sample_C3A_bin.54  | 92.51  | 1.79 | 368 | 43.7 | Lachnospiraceae | 43.7 | 2.47 |
| Sample_T13A_bin.23 | 99.32  | 1.01 | 65  | 40.8 | Clostridiales   | 40.8 | 2.16 |
| Sample_T11C_bin.17 | 94.51  | 4.28 | 61  | 46.1 | Bacteroidales   | 46.1 | 3.61 |
| Sample_T3A_bin.40  | 96.37  | 0.00 | 86  | 41.4 | Lachnospiraceae | 41.4 | 2.88 |
| Sample_T3A_bin.41  | 95.55  | 1.50 | 315 | 47.5 | Lachnospiraceae | 47.5 | 2.88 |
| Sample_T11C_bin.16 | 97.95  | 0.68 | 224 | 56.2 | Clostridiales   | 56.2 | 2.55 |
| Sample_T8C_bin.38  | 100.00 | 0.00 | 45  | 31.2 | Euryarchaeota   | 31.2 | 2.16 |
| Sample_T11C_bin.18 | 93.75  | 1.02 | 147 | 58.5 | Clostridiales   | 58.5 | 2.44 |
| Sample_T12B_bin.30 | 98.65  | 0.00 | 29  | 37.7 | Clostridiales   | 37.7 | 2.22 |
| Sample_C12C_bin.15 | 83.39  | 4.46 | 84  | 59   | Bacteria        | 59   | 1.96 |
| Sample_C12C_bin.14 | 97.98  | 1.01 | 35  | 51.4 | Clostridiales   | 51.4 | 2.56 |
| Sample_C12C_bin.16 | 95.96  | 0.81 | 20  | 49.6 | Clostridia      | 49.6 | 1.93 |
| Sample_C12C_bin.11 | 94.07  | 0.84 | 53  | 46.5 | Bacteroidales   | 46.5 | 4.08 |
| Sample_C12C_bin.10 | 84.28  | 0.00 | 143 | 59.7 | Clostridiales   | 59.7 | 2.23 |
| Sample_C12C_bin.13 | 97.97  | 2.48 | 95  | 44.9 | Prevotella      | 44.9 | 3.66 |
| Sample_C12C_bin.12 | 94.29  | 0.13 | 29  | 41.2 | Clostridiales   | 41.2 | 2.64 |
| Sample_T4A_bin.36  | 96.09  | 0.34 | 146 | 57.8 | Clostridiales   | 57.8 | 3.49 |
| Sample_T4A_bin.34  | 98.49  | 0.63 | 226 | 42   | Bacteroidales   | 42   | 4.93 |

|                    |        |      |     |      |                 |      |      |
|--------------------|--------|------|-----|------|-----------------|------|------|
| Sample_T4A_bin.35  | 98.41  | 2.00 | 132 | 44.8 | Clostridiales   | 44.8 | 2.90 |
| Sample_T4A_bin.32  | 99.44  | 0.72 | 41  | 49.3 | Lachnospiraceae | 49.3 | 3.01 |
| Sample_T4A_bin.33  | 98.12  | 0.00 | 38  | 57.2 | Proteobacteria  | 57.2 | 2.44 |
| Sample_T4A_bin.30  | 97.65  | 0.67 | 172 | 38.3 | Clostridiales   | 38.3 | 3.06 |
| Sample_T4A_bin.31  | 89.93  | 0.67 | 40  | 60.1 | Clostridiales   | 60.1 | 1.94 |
| Sample_T4A_bin.39  | 99.18  | 0.00 | 19  | 46.7 | Lactobacillales | 46.7 | 2.09 |
| Sample_C13B_bin.16 | 86.79  | 3.51 | 289 | 45   | Lactobacillales | 45   | 1.75 |
| Sample_C13B_bin.15 | 93.20  | 0.58 | 196 | 44.8 | Clostridiales   | 44.8 | 1.73 |
| Sample_C13B_bin.14 | 98.11  | 0.00 | 172 | 28.9 | Bacteria        | 28.9 | 2.96 |
| Sample_C10A_bin.18 | 85.86  | 1.01 | 281 | 44.2 | Clostridiales   | 44.2 | 2.32 |
| Sample_C13B_bin.11 | 98.87  | 1.12 | 52  | 28.3 | Bacteria        | 28.3 | 2.08 |
| Sample_C13B_bin.10 | 90.21  | 1.50 | 290 | 44.2 | Clostridiales   | 44.2 | 2.87 |
| Sample_C10A_bin.15 | 100.00 | 2.03 | 88  | 44.5 | Clostridiales   | 44.5 | 3.23 |
| Sample_C10A_bin.14 | 95.37  | 2.35 | 45  | 43.9 | Clostridiales   | 43.9 | 2.69 |
| Sample_C10A_bin.17 | 96.01  | 0.67 | 53  | 37.3 | Clostridiales   | 37.3 | 2.80 |
| Sample_C10A_bin.10 | 99.23  | 0.20 | 126 | 45.4 | Bacteroidales   | 45.4 | 4.01 |
| Sample_C13B_bin.19 | 99.51  | 2.04 | 52  | 54   | Bacteroidetes   | 54   | 2.23 |
| Sample_C13B_bin.18 | 97.09  | 0.84 | 148 | 48.8 | Clostridiales   | 48.8 | 2.68 |
| Sample_C1C_bin.4   | 86.00  | 2.58 | 331 | 62   | Clostridiales   | 62   | 1.82 |
| Sample_C1C_bin.5   | 96.51  | 0.11 | 142 | 50.5 | Clostridiales   | 50.5 | 2.75 |
| Sample_C1C_bin.6   | 99.98  | 2.10 | 41  | 43.6 | Selenomonadales | 43.6 | 2.40 |
| Sample_C1C_bin.7   | 97.98  | 0.67 | 94  | 49.8 | Clostridiales   | 49.8 | 2.16 |
| Sample_T13B_bin.25 | 82.48  | 0.99 | 703 | 45.6 | Bacteroidales   | 45.6 | 3.66 |
| Sample_C1C_bin.1   | 99.30  | 1.17 | 65  | 58   | Clostridiales   | 58   | 3.11 |
| Sample_T13B_bin.27 | 96.81  | 2.23 | 40  | 42.1 | Bacteroides     | 42.1 | 4.55 |
| Sample_C5C_bin.20  | 95.21  | 0.51 | 65  | 58.1 | Clostridiales   | 58.1 | 2.23 |
| Sample_T14B_bin.4  | 99.51  | 0.48 | 216 | 41.6 | Lachnospiraceae | 41.6 | 2.68 |
| Sample_T13B_bin.28 | 86.55  | 4.42 | 210 | 59.9 | Clostridiales   | 59.9 | 2.02 |
| Sample_C1C_bin.8   | 96.42  | 0.00 | 69  | 56.3 | Clostridiales   | 56.3 | 2.70 |
| Sample_C1C_bin.9   | 84.31  | 0.25 | 444 | 40.9 | Clostridiales   | 40.9 | 3.17 |
| Sample_T14C_bin.20 | 88.34  | 2.93 | 84  | 57.7 | Clostridiales   | 57.7 | 2.49 |
| Sample_T18C_bin.2  | 96.15  | 2.00 | 153 | 54.6 | Bacteroidetes   | 54.6 | 2.24 |
| Sample_T7C_bin.11  | 91.88  | 0.19 | 191 | 42.3 | Bacteroidales   | 42.3 | 3.73 |
| Sample_T14C_bin.23 | 81.66  | 0.06 | 69  | 48.1 | Clostridiales   | 48.1 | 1.79 |
| Sample_T18C_bin.4  | 99.25  | 0.74 | 70  | 49.6 | Bacteroidales   | 49.6 | 2.71 |
| Sample_T18C_bin.5  | 90.93  | 0.57 | 109 | 60.1 | Clostridiales   | 60.1 | 1.95 |
| Sample_T11C_bin.46 | 81.51  | 1.65 | 500 | 29.8 | Bacteria        | 29.8 | 2.32 |
| Sample_T11C_bin.44 | 90.14  | 1.67 | 113 | 42.1 | Bacteroidales   | 42.1 | 3.33 |
| Sample_T11C_bin.45 | 98.10  | 1.58 | 94  | 41.1 | Clostridiales   | 41.1 | 3.52 |

|                    |        |      |     |      |                     |      |      |
|--------------------|--------|------|-----|------|---------------------|------|------|
| Sample_T11C_bin.42 | 92.78  | 0.00 | 103 | 60.1 | Bacteroidetes       | 60.1 | 2.63 |
| Sample_T11C_bin.43 | 84.33  | 2.46 | 239 | 42.3 | Lachnospiraceae     | 42.3 | 2.41 |
| Sample_T11C_bin.40 | 99.51  | 3.85 | 27  | 54.6 | Bacteroidetes       | 54.6 | 2.23 |
| Sample_T8B_bin.9   | 95.30  | 0.34 | 22  | 36.3 | Clostridiales       | 36.3 | 2.14 |
| Sample_C10A_bin.4  | 96.77  | 0.90 | 99  | 26.8 | Clostridiales       | 26.8 | 2.72 |
| Sample_C10A_bin.7  | 85.40  | 2.75 | 91  | 61.4 | Clostridiales       | 61.4 | 2.07 |
| Sample_T16B_bin.27 | 98.65  | 0.00 | 21  | 36   | Clostridiales       | 36   | 2.57 |
| Sample_C10A_bin.1  | 93.35  | 2.01 | 49  | 49.3 | Clostridiales       | 49.3 | 2.14 |
| Sample_C10A_bin.3  | 97.62  | 0.00 | 60  | 59.1 | Bacteroidetes       | 59.1 | 2.93 |
| Sample_C10A_bin.2  | 94.61  | 0.24 | 24  | 49.6 | Lachnospiraceae     | 49.6 | 2.96 |
| Sample_T8B_bin.1   | 98.63  | 0.00 | 389 | 42.3 | Clostridiales       | 42.3 | 3.09 |
| Sample_C10A_bin.8  | 99.32  | 0.38 | 31  | 36.5 | Clostridiales       | 36.5 | 2.28 |
| Sample_T3A_bin.2   | 95.41  | 2.11 | 75  | 44   | Clostridiales       | 44   | 3.10 |
| Sample_T16B_bin.22 | 98.79  | 0.48 | 209 | 58.4 | Bacteroidetes       | 58.4 | 3.10 |
| Sample_T14C_bin.28 | 98.73  | 0.02 | 100 | 48.8 | Firmicutes          | 48.8 | 2.11 |
| Sample_T12A_bin.11 | 95.94  | 0.74 | 378 | 48.2 | Bacteroidales       | 48.2 | 2.60 |
| Sample_T12A_bin.12 | 85.29  | 3.90 | 54  | 60.9 | Clostridia          | 60.9 | 2.00 |
| Sample_T12A_bin.15 | 94.74  | 1.34 | 104 | 51.7 | Clostridiales       | 51.7 | 2.05 |
| Sample_T12A_bin.17 | 98.01  | 0.00 | 230 | 51.9 | Firmicutes          | 51.9 | 2.49 |
| Sample_T12A_bin.18 | 92.00  | 0.00 | 39  | 26.5 | Bacteria            | 26.5 | 1.33 |
| Sample_T12A_bin.19 | 97.09  | 0.73 | 84  | 56.6 | Clostridiales       | 56.6 | 2.40 |
| Sample_T11A_bin.13 | 94.15  | 0.03 | 86  | 41.8 | Lachnospiraceae     | 41.8 | 2.33 |
| Sample_T11A_bin.11 | 97.67  | 1.44 | 52  | 47.9 | Clostridiales       | 47.9 | 3.13 |
| Sample_T11A_bin.17 | 97.91  | 0.10 | 90  | 60.1 | Bacteroidetes       | 60.1 | 2.69 |
| Sample_T11A_bin.16 | 93.39  | 3.06 | 80  | 58.7 | Clostridiales       | 58.7 | 2.27 |
| Sample_T11A_bin.14 | 81.11  | 0.57 | 351 | 56.8 | Clostridiales       | 56.8 | 1.98 |
| Sample_T6A_bin.30  | 95.23  | 0.23 | 151 | 61   | Clostridiales       | 61   | 2.16 |
| Sample_T11A_bin.19 | 91.64  | 1.73 | 130 | 60.2 | Bifidobacteriaceae  | 60.2 | 1.91 |
| Sample_T11A_bin.18 | 82.40  | 0.10 | 656 | 60.3 | Deltaproteobacteria | 60.3 | 3.10 |
| Sample_T6A_bin.31  | 98.99  | 0.00 | 75  | 45.1 | Clostridiales       | 45.1 | 2.70 |
| Sample_C10B_bin.4  | 96.96  | 1.93 | 69  | 43.5 | Lachnospiraceae     | 43.5 | 2.94 |
| Sample_C2A_bin.11  | 87.05  | 0.67 | 23  | 53.3 | Clostridiales       | 53.3 | 2.03 |
| Sample_T12A_bin.42 | 89.93  | 2.35 | 44  | 61.7 | Clostridiales       | 61.7 | 1.93 |
| Sample_T3A_bin.8   | 97.98  | 0.00 | 96  | 37.5 | Clostridiales       | 37.5 | 2.66 |
| Sample_C12A_bin.41 | 90.28  | 0.00 | 122 | 51.7 | Clostridiales       | 51.7 | 1.92 |
| Sample_C12A_bin.42 | 100.00 | 0.14 | 151 | 48.4 | Proteobacteria      | 48.4 | 2.64 |
| Sample_C12A_bin.43 | 86.39  | 2.01 | 264 | 57.3 | Clostridiales       | 57.3 | 1.97 |
| Sample_C1C_bin.51  | 99.32  | 0.00 | 97  | 44   | Clostridiales       | 44   | 2.81 |
| Sample_T7A_bin.39  | 89.04  | 2.25 | 151 | 26.5 | Bacteria            | 26.5 | 1.06 |

|                    |        |      |     |      |                 |      |      |
|--------------------|--------|------|-----|------|-----------------|------|------|
| Sample_T7A_bin.38  | 92.20  | 0.68 | 182 | 56.5 | Clostridiales   | 56.5 | 2.30 |
| Sample_T15C_bin.31 | 80.80  | 0.67 | 185 | 59.8 | Clostridiales   | 59.8 | 1.72 |
| Sample_T7A_bin.32  | 94.73  | 2.39 | 146 | 41.3 | Bacteria        | 41.3 | 3.38 |
| Sample_C10B_bin.3  | 97.35  | 2.14 | 174 | 37.4 | Clostridiales   | 37.4 | 2.73 |
| Sample_T7A_bin.34  | 99.25  | 0.00 | 116 | 50.4 | Bacteroidales   | 50.4 | 2.86 |
| Sample_C8B_bin.14  | 98.52  | 1.01 | 95  | 39.1 | Clostridiales   | 39.1 | 1.97 |
| Sample_C8B_bin.16  | 97.28  | 1.69 | 46  | 43.7 | Lachnospiraceae | 43.7 | 2.74 |
| Sample_C8B_bin.10  | 94.25  | 1.37 | 384 | 48.5 | Proteobacteria  | 48.5 | 2.53 |
| Sample_T8A_bin.9   | 100.00 | 0.00 | 139 | 48.6 | Proteobacteria  | 48.6 | 2.66 |
| Sample_T18B_bin.3  | 98.73  | 3.38 | 84  | 43.4 | Lachnospiraceae | 43.4 | 3.04 |
| Sample_T18B_bin.2  | 92.49  | 2.05 | 134 | 40.9 | Lachnospiraceae | 40.9 | 3.80 |
| Sample_T13A_bin.19 | 98.63  | 0.00 | 37  | 42.9 | Clostridiales   | 42.9 | 2.76 |
| Sample_T18B_bin.7  | 97.98  | 2.01 | 74  | 40.9 | Clostridiales   | 40.9 | 1.99 |
| Sample_C14C_bin.15 | 99.35  | 1.50 | 65  | 41.6 | Lachnospiraceae | 41.6 | 2.90 |
| Sample_T18B_bin.4  | 99.32  | 0.67 | 83  | 54.8 | Clostridiales   | 54.8 | 2.77 |
| Sample_T4C_bin.8   | 99.18  | 0.00 | 19  | 46.7 | Lactobacillales | 46.7 | 2.08 |
| Sample_T18B_bin.9  | 87.72  | 0.93 | 210 | 47.2 | Bacteroidales   | 47.2 | 2.81 |
| Sample_T16B_bin.39 | 93.87  | 0.70 | 61  | 60.1 | Clostridiales   | 60.1 | 2.51 |
| Sample_T1C_bin.2   | 95.51  | 2.55 | 158 | 58.4 | Clostridiales   | 58.4 | 2.27 |
| Sample_T16B_bin.33 | 93.77  | 1.48 | 37  | 49   | Clostridiales   | 49   | 2.55 |
| Sample_T16B_bin.31 | 97.98  | 1.01 | 163 | 44.2 | Clostridiales   | 44.2 | 2.19 |
| Sample_T16B_bin.37 | 93.94  | 0.74 | 127 | 42   | Bacteroidales   | 42   | 4.02 |
| Sample_T16B_bin.36 | 84.67  | 0.89 | 271 | 42.6 | Clostridiales   | 42.6 | 2.32 |
| Sample_C8C_bin.13  | 99.21  | 2.24 | 302 | 43.7 | Lachnospiraceae | 43.7 | 3.05 |
| Sample_C14C_bin.18 | 98.67  | 1.21 | 98  | 41.4 | Lachnospiraceae | 41.4 | 3.48 |
| Sample_C11B_bin.28 | 96.64  | 1.34 | 55  | 51.8 | Clostridiales   | 51.8 | 2.58 |
| Sample_C11B_bin.29 | 92.86  | 2.20 | 362 | 48.8 | Bacteroidales   | 48.8 | 3.60 |
| Sample_C8C_bin.12  | 80.92  | 2.40 | 47  | 59.5 | Bacteroidetes   | 59.5 | 2.12 |
| Sample_C11B_bin.24 | 95.93  | 0.00 | 45  | 51.5 | Clostridiales   | 51.5 | 2.17 |
| Sample_C11B_bin.25 | 87.35  | 1.12 | 50  | 26.6 | Bacteria        | 26.6 | 1.22 |
| Sample_C11B_bin.26 | 87.77  | 4.46 | 94  | 42.2 | Bacteroidales   | 42.2 | 3.22 |
| Sample_C11B_bin.20 | 97.12  | 0.84 | 127 | 45.9 | Prevotella      | 45.9 | 2.95 |
| Sample_T10C_bin.8  | 92.70  | 2.16 | 302 | 44.1 | Clostridiales   | 44.1 | 3.13 |
| Sample_C11B_bin.22 | 95.56  | 1.61 | 194 | 59.8 | Actinobacteria  | 59.8 | 2.20 |
| Sample_C8B_bin.19  | 91.94  | 0.02 | 41  | 62.4 | Clostridiales   | 62.4 | 1.84 |
| Sample_C10B_bin.34 | 86.46  | 1.51 | 108 | 38.5 | Clostridiales   | 38.5 | 1.94 |
| Sample_T10C_bin.9  | 97.05  | 0.77 | 152 | 41.7 | Lachnospiraceae | 41.7 | 3.13 |
| Sample_C10B_bin.32 | 90.60  | 0.00 | 47  | 60.8 | Clostridiales   | 60.8 | 2.33 |
| Sample_C10B_bin.33 | 97.26  | 1.34 | 389 | 42.9 | Clostridiales   | 42.9 | 2.77 |

|                    |       |      |     |      |                    |      |      |
|--------------------|-------|------|-----|------|--------------------|------|------|
| Sample_C10B_bin.30 | 95.06 | 3.46 | 91  | 42.7 | Lachnospiraceae    | 42.7 | 2.73 |
| Sample_C10B_bin.31 | 92.02 | 0.00 | 57  | 42.4 | Lachnospiraceae    | 42.4 | 2.02 |
| Sample_T6B_bin.39  | 90.93 | 0.00 | 100 | 62.4 | Clostridiales      | 62.4 | 1.87 |
| Sample_T6B_bin.38  | 92.96 | 0.58 | 135 | 41.6 | Bacteroides        | 41.6 | 5.96 |
| Sample_T14A_bin.2  | 96.66 | 0.00 | 60  | 37.4 | Clostridiales      | 37.4 | 2.64 |
| Sample_C9B_bin.15  | 96.68 | 0.00 | 45  | 37.2 | Clostridiales      | 37.2 | 2.79 |
| Sample_C9B_bin.14  | 99.42 | 0.38 | 78  | 44.9 | Bacteroidales      | 44.9 | 4.79 |
| Sample_C9B_bin.17  | 90.09 | 0.00 | 57  | 41.6 | Lachnospiraceae    | 41.6 | 2.71 |
| Sample_C9B_bin.11  | 97.36 | 1.17 | 52  | 40.8 | Lachnospiraceae    | 40.8 | 2.65 |
| Sample_T6B_bin.34  | 98.65 | 1.01 | 323 | 38.5 | Clostridiales      | 38.5 | 2.32 |
| Sample_C9B_bin.19  | 92.27 | 0.94 | 51  | 42.6 | Lachnospiraceae    | 42.6 | 3.37 |
| Sample_C9B_bin.18  | 84.06 | 1.30 | 191 | 47.7 | Bacteroidales      | 47.7 | 3.26 |
| Sample_C6B_bin.51  | 90.73 | 0.18 | 279 | 50   | Clostridiales      | 50   | 2.44 |
| Sample_T6B_bin.31  | 89.85 | 0.63 | 28  | 42.2 | Bacteroidales      | 42.2 | 3.24 |
| Sample_T14A_bin.9  | 97.98 | 0.34 | 45  | 44.3 | Clostridiales      | 44.3 | 2.06 |
| Sample_C4B_bin.32  | 89.86 | 2.85 | 163 | 44.2 | Clostridiales      | 44.2 | 2.84 |
| Sample_C4B_bin.33  | 94.03 | 2.82 | 137 | 59.6 | Bifidobacteriaceae | 59.6 | 1.99 |
| Sample_T6B_bin.32  | 98.65 | 0.34 | 236 | 41.8 | Clostridiales      | 41.8 | 2.80 |
| Sample_C4B_bin.31  | 89.19 | 3.08 | 255 | 37.3 | Clostridiales      | 37.3 | 2.51 |
| Sample_T2A_bin.48  | 96.62 | 1.35 | 101 | 46.1 | Prevotella         | 46.1 | 3.47 |
| Sample_C12B_bin.4  | 84.89 | 0.00 | 111 | 60   | Clostridiales      | 60   | 2.07 |
| Sample_C6A_bin.42  | 91.27 | 0.71 | 74  | 58.3 | Clostridiales      | 58.3 | 2.59 |
| Sample_C12B_bin.1  | 93.12 | 2.56 | 90  | 59.3 | Clostridiales      | 59.3 | 2.11 |
| Sample_C6B_bin.52  | 93.82 | 0.00 | 263 | 36.5 | Clostridiales      | 36.5 | 3.06 |
| Sample_C12B_bin.3  | 95.00 | 2.24 | 155 | 44.3 | Bacteroidales      | 44.3 | 3.55 |
| Sample_C6B_bin.50  | 96.30 | 0.34 | 308 | 46.4 | Clostridiales      | 46.4 | 2.44 |
| Sample_T11B_bin.12 | 87.84 | 2.35 | 197 | 59.3 | Clostridiales      | 59.3 | 1.83 |
| Sample_C14C_bin.9  | 98.73 | 0.02 | 110 | 48.3 | Firmicutes         | 48.3 | 2.16 |
| Sample_C14C_bin.8  | 99.19 | 1.44 | 41  | 54.3 | Bacteroidetes      | 54.3 | 2.33 |
| Sample_C10B_bin.8  | 98.43 | 0.67 | 73  | 43.1 | Clostridiales      | 43.1 | 3.20 |
| Sample_C10B_bin.9  | 90.51 | 4.75 | 287 | 59.3 | Bacteroidetes      | 59.3 | 2.76 |
| Sample_C14C_bin.3  | 94.96 | 1.68 | 27  | 38.2 | Clostridiales      | 38.2 | 2.42 |
| Sample_C10B_bin.7  | 95.95 | 1.34 | 266 | 45.2 | Clostridiales      | 45.2 | 2.40 |
| Sample_C14C_bin.1  | 97.94 | 0.00 | 45  | 43   | Clostridiales      | 43   | 2.46 |
| Sample_C10B_bin.5  | 84.37 | 0.00 | 107 | 35.9 | Bacteria           | 35.9 | 2.55 |
| Sample_C14C_bin.7  | 98.98 | 3.66 | 120 | 45.1 | Prevotella         | 45.1 | 3.47 |
| Sample_C14C_bin.6  | 93.21 | 2.42 | 146 | 47.4 | Lachnospiraceae    | 47.4 | 2.75 |
| Sample_C14C_bin.4  | 96.70 | 0.70 | 97  | 46.1 | Bacteroidales      | 46.1 | 3.04 |
| Sample_T11B_bin.11 | 95.77 | 3.32 | 140 | 47   | Lachnospiraceae    | 47   | 3.09 |

|                    |        |      |     |      |                 |      |      |
|--------------------|--------|------|-----|------|-----------------|------|------|
| Sample_C6B_bin.54  | 100.00 | 1.88 | 35  | 63.1 | Actinobacteria  | 63.1 | 2.75 |
| Sample_T13B_bin.6  | 93.71  | 1.34 | 121 | 47.5 | Lachnospiraceae | 47.5 | 2.83 |
| Sample_C6B_bin.55  | 97.76  | 0.00 | 69  | 56.9 | Clostridiales   | 56.9 | 2.28 |
| Sample_T11B_bin.17 | 97.98  | 0.00 | 141 | 46   | Clostridiales   | 46   | 2.86 |
| Sample_T3A_bin.38  | 98.86  | 0.58 | 97  | 41.8 | Lachnospiraceae | 41.8 | 2.47 |
| Sample_T14C_bin.31 | 91.68  | 0.26 | 267 | 43.5 | Bacteroidales   | 43.5 | 2.80 |
| Sample_T3A_bin.35  | 98.31  | 0.00 | 43  | 43.2 | Bacteroidales   | 43.2 | 4.73 |
| Sample_T3A_bin.34  | 96.20  | 0.95 | 81  | 49.2 | Clostridiales   | 49.2 | 2.52 |
| Sample_T3A_bin.37  | 83.05  | 0.65 | 587 | 41.8 | Bacteroides     | 41.8 | 5.50 |
| Sample_T13B_bin.5  | 96.62  | 0.00 | 88  | 45.1 | Clostridiales   | 45.1 | 2.41 |
| Sample_T3A_bin.31  | 99.32  | 0.67 | 230 | 40.9 | Clostridiales   | 40.9 | 2.09 |
| Sample_T3A_bin.33  | 89.16  | 0.89 | 133 | 61   | Clostridiales   | 61   | 1.69 |
| Sample_T3A_bin.32  | 94.57  | 2.94 | 172 | 39.5 | Pasteurellaceae | 39.5 | 1.92 |
| Sample_T11B_bin.18 | 87.57  | 0.34 | 199 | 63   | Clostridiales   | 63   | 1.65 |
| Sample_T11B_bin.19 | 96.20  | 0.11 | 230 | 56.5 | Clostridiales   | 56.5 | 2.35 |
| Sample_C12C_bin.28 | 90.93  | 2.01 | 176 | 46.9 | Clostridiales   | 46.9 | 2.03 |
| Sample_C12C_bin.20 | 98.65  | 0.34 | 171 | 38.7 | Clostridiales   | 38.7 | 2.27 |
| Sample_C12C_bin.22 | 97.98  | 1.01 | 73  | 37.7 | Clostridiales   | 37.7 | 3.76 |
| Sample_C12C_bin.24 | 90.16  | 1.12 | 180 | 26.6 | Bacteria        | 26.6 | 1.25 |
| Sample_C12C_bin.26 | 99.62  | 0.38 | 34  | 43.7 | Bacteroidales   | 43.7 | 3.21 |
| Sample_C12C_bin.27 | 92.17  | 0.23 | 175 | 60.3 | Clostridiales   | 60.3 | 2.53 |
| Sample_T13A_bin.33 | 99.07  | 0.93 | 58  | 49.5 | Bacteroidales   | 49.5 | 2.84 |
| Sample_T13A_bin.32 | 99.36  | 0.63 | 132 | 49.3 | Proteobacteria  | 49.3 | 2.29 |
| Sample_T13A_bin.30 | 99.25  | 0.42 | 72  | 45.2 | Bacteroidales   | 45.2 | 3.68 |
| Sample_T13A_bin.36 | 97.98  | 0.34 | 31  | 44.6 | Clostridiales   | 44.6 | 1.90 |
| Sample_T13A_bin.35 | 84.59  | 1.81 | 284 | 37.5 | Clostridiales   | 37.5 | 2.08 |
| Sample_T13A_bin.34 | 90.18  | 0.29 | 382 | 43.5 | Bacteria        | 43.5 | 3.87 |
| Sample_C6B_bin.40  | 97.98  | 0.00 | 165 | 37.6 | Clostridiales   | 37.6 | 2.59 |
| Sample_C6B_bin.43  | 96.49  | 1.08 | 14  | 33.4 | Bacteria        | 33.4 | 2.20 |
| Sample_C6B_bin.42  | 95.97  | 0.00 | 122 | 47.7 | Clostridiales   | 47.7 | 2.32 |
| Sample_C6B_bin.45  | 90.74  | 2.95 | 330 | 42   | Bacteroides     | 42   | 5.21 |
| Sample_T7B_bin.12  | 91.54  | 2.04 | 117 | 60.6 | Clostridiales   | 60.6 | 2.29 |
| Sample_T7B_bin.13  | 88.36  | 1.61 | 304 | 60.2 | Actinobacteria  | 60.2 | 1.77 |
| Sample_T7B_bin.10  | 97.31  | 0.13 | 58  | 58.6 | Clostridiales   | 58.6 | 2.18 |
| Sample_C9A_bin.10  | 99.36  | 1.27 | 42  | 38.4 | Clostridiales   | 38.4 | 2.74 |
| Sample_T7B_bin.17  | 98.11  | 0.85 | 254 | 42.3 | Bacteroidales   | 42.3 | 5.14 |
| Sample_T7B_bin.14  | 97.76  | 0.00 | 112 | 40.6 | Bacteroidales   | 40.6 | 3.23 |
| Sample_T7B_bin.15  | 93.28  | 1.01 | 116 | 62.4 | Clostridiales   | 62.4 | 1.87 |
| Sample_T7B_bin.19  | 84.05  | 0.97 | 40  | 43.5 | Lachnospiraceae | 43.5 | 2.68 |

|                    |        |      |     |      |                     |      |      |
|--------------------|--------|------|-----|------|---------------------|------|------|
| Sample_T13A_bin.12 | 100.00 | 1.61 | 107 | 59.7 | Actinobacteria      | 59.7 | 2.24 |
| Sample_T13B_bin.14 | 100.00 | 3.80 | 20  | 60   | Bifidobacteriaceae  | 60   | 2.58 |
| Sample_C10A_bin.21 | 93.95  | 0.84 | 121 | 44.6 | Clostridiales       | 44.6 | 1.82 |
| Sample_T13B_bin.16 | 99.62  | 0.28 | 60  | 50.8 | Enterobacteriaceae  | 50.8 | 4.66 |
| Sample_T13B_bin.17 | 92.14  | 1.44 | 31  | 60.3 | Bacteroidetes       | 60.3 | 2.40 |
| Sample_C10A_bin.24 | 96.97  | 0.89 | 107 | 44.7 | Clostridiales       | 44.7 | 2.74 |
| Sample_T13B_bin.12 | 97.31  | 1.01 | 118 | 52.2 | Clostridiales       | 52.2 | 2.13 |
| Sample_T13B_bin.13 | 94.63  | 1.34 | 74  | 58.1 | Clostridiales       | 58.1 | 2.74 |
| Sample_C10A_bin.29 | 97.98  | 1.01 | 44  | 38.2 | Clostridiales       | 38.2 | 2.76 |
| Sample_T2B_bin.3   | 98.28  | 0.19 | 305 | 48.4 | Bacteroidales       | 48.4 | 3.99 |
| Sample_C2C_bin.10  | 88.20  | 1.12 | 15  | 27.3 | Bacteria            | 27.3 | 1.03 |
| Sample_T2B_bin.1   | 96.64  | 0.00 | 39  | 49.9 | Clostridiales       | 49.9 | 2.38 |
| Sample_C2C_bin.12  | 87.68  | 1.50 | 369 | 53.6 | Selenomonadales     | 53.6 | 2.12 |
| Sample_C2C_bin.14  | 100.00 | 0.11 | 18  | 29.3 | Bacteria            | 29.3 | 1.56 |
| Sample_T2B_bin.5   | 96.42  | 1.03 | 241 | 57.1 | Clostridiales       | 57.1 | 2.30 |
| Sample_T2B_bin.4   | 84.22  | 0.00 | 38  | 62.3 | Clostridiales       | 62.3 | 1.65 |
| Sample_T14A_bin.16 | 93.11  | 2.33 | 93  | 41.9 | Lachnospiraceae     | 41.9 | 2.96 |
| Sample_C2C_bin.18  | 99.32  | 0.22 | 27  | 43.6 | Clostridiales       | 43.6 | 2.94 |
| Sample_T2B_bin.9   | 98.65  | 0.00 | 27  | 41   | Clostridiales       | 41   | 2.57 |
| Sample_T2B_bin.8   | 97.31  | 0.00 | 194 | 52.2 | Clostridiales       | 52.2 | 3.00 |
| Sample_T14A_bin.12 | 85.81  | 0.42 | 246 | 41.8 | Clostridiales       | 41.8 | 2.74 |
| Sample_T14A_bin.13 | 98.77  | 0.38 | 123 | 43.4 | Bacteroidales       | 43.4 | 3.07 |
| Sample_T14A_bin.10 | 99.30  | 1.17 | 91  | 57.9 | Clostridiales       | 57.9 | 3.10 |
| Sample_T10A_bin.1  | 97.20  | 1.17 | 31  | 57.9 | Clostridiales       | 57.9 | 3.11 |
| Sample_T10A_bin.2  | 90.42  | 0.56 | 105 | 38.3 | Lactobacillales     | 38.3 | 2.13 |
| Sample_T10A_bin.3  | 91.25  | 1.58 | 195 | 58.9 | Deltaproteobacteria | 58.9 | 2.36 |
| Sample_T10A_bin.4  | 98.24  | 0.00 | 72  | 41.8 | Lachnospiraceae     | 41.8 | 2.36 |
| Sample_T10A_bin.5  | 97.90  | 0.93 | 30  | 53   | Clostridiales       | 53   | 2.34 |
| Sample_T10A_bin.7  | 93.97  | 1.41 | 183 | 28.6 | Clostridiales       | 28.6 | 2.63 |
| Sample_T10A_bin.8  | 82.49  | 0.67 | 153 | 62   | Clostridiales       | 62   | 1.70 |
| Sample_T10A_bin.9  | 84.70  | 1.52 | 321 | 58.6 | Bifidobacteriaceae  | 58.6 | 2.19 |
| Sample_C11C_bin.8  | 81.22  | 1.58 | 401 | 53.5 | Clostridiales       | 53.5 | 2.28 |
| Sample_C11C_bin.9  | 100.00 | 1.27 | 135 | 31.1 | Firmicutes          | 31.1 | 2.63 |
| Sample_T14B_bin.19 | 97.66  | 0.58 | 72  | 41.9 | Lachnospiraceae     | 41.9 | 2.30 |
| Sample_T14B_bin.18 | 90.09  | 1.37 | 44  | 43.5 | Lachnospiraceae     | 43.5 | 2.74 |
| Sample_C11C_bin.1  | 87.67  | 0.53 | 20  | 49.8 | Clostridiales       | 49.8 | 2.11 |
| Sample_C11C_bin.2  | 82.65  | 0.32 | 29  | 47.4 | Clostridiales       | 47.4 | 2.47 |
| Sample_T14B_bin.13 | 91.20  | 0.72 | 113 | 42   | Lachnospiraceae     | 42   | 2.61 |
| Sample_C11C_bin.6  | 80.52  | 2.97 | 355 | 30.8 | Bacteria            | 30.8 | 1.48 |

|                    |        |      |     |      |                    |      |      |
|--------------------|--------|------|-----|------|--------------------|------|------|
| Sample_C11C_bin.7  | 99.42  | 1.15 | 45  | 45.1 | Bacteroidales      | 45.1 | 4.56 |
| Sample_T12C_bin.30 | 93.23  | 1.45 | 81  | 41.8 | Lachnospiraceae    | 41.8 | 2.87 |
| Sample_T12C_bin.31 | 98.07  | 2.47 | 39  | 45.8 | Bacteroidales      | 45.8 | 3.31 |
| Sample_T2A_bin.2   | 84.02  | 2.87 | 30  | 41.8 | Lachnospiraceae    | 41.8 | 2.79 |
| Sample_T2A_bin.3   | 96.64  | 0.67 | 72  | 40.9 | Clostridiales      | 40.9 | 2.55 |
| Sample_T2A_bin.4   | 96.49  | 0.00 | 101 | 41.7 | Clostridiales      | 41.7 | 2.77 |
| Sample_T2A_bin.5   | 96.10  | 0.89 | 176 | 57.1 | Clostridiales      | 57.1 | 2.26 |
| Sample_T2A_bin.6   | 100.00 | 1.48 | 158 | 31.2 | Firmicutes         | 31.2 | 2.58 |
| Sample_T8C_bin.19  | 99.98  | 1.70 | 28  | 43.4 | Selenomonadales    | 43.4 | 2.49 |
| Sample_C4C_bin.32  | 97.10  | 1.93 | 211 | 46.8 | Lachnospiraceae    | 46.8 | 3.02 |
| Sample_C2C_bin.16  | 87.73  | 1.46 | 292 | 42.2 | Lachnospiraceae    | 42.2 | 2.01 |
| Sample_C3B_bin.30  | 96.85  | 1.21 | 105 | 41.5 | Lachnospiraceae    | 41.5 | 2.62 |
| Sample_C3B_bin.33  | 96.93  | 1.33 | 133 | 58.5 | Clostridiales      | 58.5 | 3.12 |
| Sample_T8A_bin.21  | 87.06  | 0.67 | 162 | 61.9 | Clostridiales      | 61.9 | 1.94 |
| Sample_T8A_bin.20  | 99.03  | 0.98 | 33  | 54.3 | Bacteroidetes      | 54.3 | 2.23 |
| Sample_T8A_bin.25  | 95.97  | 0.67 | 122 | 48.3 | Clostridiales      | 48.3 | 2.00 |
| Sample_T8A_bin.26  | 99.36  | 1.27 | 49  | 38.4 | Clostridiales      | 38.4 | 2.76 |
| Sample_T7A_bin.29  | 99.31  | 0.16 | 39  | 50.7 | Enterobacteriaceae | 50.7 | 4.72 |
| Sample_T7A_bin.22  | 97.98  | 0.34 | 152 | 44.5 | Clostridiales      | 44.5 | 1.99 |
| Sample_T7A_bin.21  | 92.46  | 2.24 | 22  | 43.6 | Lachnospiraceae    | 43.6 | 2.69 |
| Sample_T7A_bin.24  | 93.95  | 2.01 | 173 | 57.4 | Clostridiales      | 57.4 | 3.16 |
| Sample_T7A_bin.25  | 97.53  | 1.70 | 229 | 55.7 | Clostridiales      | 55.7 | 3.02 |
| Sample_T6C_bin.29  | 98.73  | 0.04 | 113 | 48.5 | Firmicutes         | 48.5 | 2.03 |
| Sample_T6C_bin.28  | 96.81  | 0.64 | 33  | 38.4 | Clostridiales      | 38.4 | 2.69 |
| Sample_T6C_bin.27  | 99.32  | 1.19 | 65  | 40.8 | Clostridiales      | 40.8 | 2.25 |
| Sample_T6C_bin.26  | 99.30  | 0.67 | 53  | 36.9 | Clostridiales      | 36.9 | 2.88 |
| Sample_T6C_bin.21  | 94.63  | 2.85 | 18  | 38.5 | Clostridiales      | 38.5 | 2.61 |
| Sample_T6C_bin.20  | 96.30  | 0.00 | 279 | 45   | Clostridiales      | 45   | 2.81 |
| Sample_T6C_bin.23  | 98.65  | 0.67 | 248 | 44.2 | Clostridiales      | 44.2 | 2.70 |
| Sample_C11B_bin.8  | 99.40  | 2.15 | 87  | 47.8 | Selenomonadales    | 47.8 | 2.01 |
| Sample_C11B_bin.3  | 98.65  | 0.34 | 19  | 38.5 | Clostridiales      | 38.5 | 2.10 |
| Sample_C11B_bin.5  | 97.53  | 1.45 | 93  | 33.3 | Clostridiales      | 33.3 | 2.18 |
| Sample_C11B_bin.4  | 100.00 | 1.27 | 44  | 31.5 | Firmicutes         | 31.5 | 2.29 |
| Sample_C11B_bin.7  | 95.34  | 0.00 | 35  | 35.9 | Clostridiales      | 35.9 | 2.70 |
| Sample_C11B_bin.6  | 94.63  | 0.00 | 48  | 37.5 | Clostridiales      | 37.5 | 2.60 |
| Sample_T16B_bin.48 | 87.08  | 4.14 | 280 | 43.2 | Clostridiales      | 43.2 | 3.45 |
| Sample_T16B_bin.49 | 97.09  | 1.34 | 59  | 40.6 | Clostridiales      | 40.6 | 2.78 |
| Sample_T16B_bin.46 | 90.77  | 0.54 | 39  | 41.6 | Lachnospiraceae    | 41.6 | 2.56 |
| Sample_T16B_bin.47 | 95.30  | 0.00 | 64  | 32   | Clostridiales      | 32   | 2.78 |



|                    |       |      |     |      |                    |      |      |
|--------------------|-------|------|-----|------|--------------------|------|------|
| Sample_T16B_bin.44 | 99.28 | 0.95 | 59  | 44.8 | Clostridiales      | 44.8 | 2.89 |
| Sample_T16B_bin.42 | 96.97 | 0.67 | 173 | 38.9 | Clostridiales      | 38.9 | 2.19 |
| Sample_T16B_bin.43 | 96.87 | 0.62 | 137 | 60.3 | Bifidobacteriaceae | 60.3 | 2.11 |
| Sample_T16B_bin.40 | 99.55 | 0.00 | 43  | 60.4 | Bifidobacteriaceae | 60.4 | 1.91 |
| Sample_C10B_bin.25 | 80.86 | 4.71 | 215 | 60.5 | Clostridiales      | 60.5 | 1.98 |
| Sample_C10B_bin.24 | 99.03 | 0.85 | 48  | 42.9 | Lachnospiraceae    | 42.9 | 3.32 |
| Sample_C11B_bin.31 | 99.51 | 1.69 | 283 | 41.8 | Lachnospiraceae    | 41.8 | 2.87 |
| Sample_C11B_bin.30 | 90.26 | 0.27 | 54  | 62.3 | Clostridiales      | 62.3 | 1.92 |
| Sample_C10B_bin.21 | 97.31 | 0.00 | 9   | 53.9 | Clostridiales      | 53.9 | 1.85 |
| Sample_C11B_bin.36 | 89.32 | 2.50 | 150 | 45   | Bacteroidales      | 45   | 3.07 |
| Sample_C10B_bin.23 | 98.24 | 0.00 | 100 | 42.9 | Lachnospiraceae    | 42.9 | 2.43 |
| Sample_C10B_bin.22 | 95.70 | 2.88 | 142 | 46.8 | Bacteroidales      | 46.8 | 4.04 |
| Sample_C4A_bin.47  | 81.16 | 3.24 | 275 | 61.6 | Clostridiales      | 61.6 | 1.95 |
| Sample_C4A_bin.44  | 95.17 | 2.18 | 255 | 37.4 | Clostridiales      | 37.4 | 2.25 |
| Sample_C4A_bin.45  | 98.65 | 0.67 | 36  | 44   | Clostridiales      | 44   | 3.03 |
| Sample_C4A_bin.43  | 99.32 | 0.48 | 79  | 49.3 | Lachnospiraceae    | 49.3 | 3.33 |
| Sample_C4A_bin.40  | 89.66 | 0.48 | 54  | 59.2 | Bacteroidetes      | 59.2 | 2.46 |
| Sample_C4A_bin.41  | 98.63 | 3.07 | 223 | 56.3 | Clostridiales      | 56.3 | 2.46 |
| Sample_C5A_bin.22  | 92.69 | 4.49 | 99  | 26.1 | Bacteria           | 26.1 | 1.31 |
| Sample_T3C_bin.12  | 94.55 | 0.00 | 31  | 60.1 | Clostridiales      | 60.1 | 2.51 |
| Sample_T11C_bin.1  | 97.33 | 0.00 | 48  | 60.4 | Bifidobacteriaceae | 60.4 | 1.88 |
| Sample_C4B_bin.12  | 99.32 | 0.34 | 61  | 38.7 | Clostridiales      | 38.7 | 3.28 |
| Sample_C4B_bin.13  | 94.44 | 0.00 | 307 | 41.7 | Lachnospiraceae    | 41.7 | 2.62 |
| Sample_C4B_bin.14  | 81.33 | 0.74 | 129 | 50.3 | Clostridiales      | 50.3 | 1.91 |
| Sample_T11C_bin.7  | 97.98 | 0.78 | 34  | 37.5 | Clostridiales      | 37.5 | 2.64 |
| Sample_T11C_bin.6  | 84.99 | 4.35 | 270 | 48.1 | Lachnospiraceae    | 48.1 | 2.24 |
| Sample_T11C_bin.9  | 97.98 | 1.01 | 50  | 38   | Clostridiales      | 38   | 2.91 |
| Sample_T11C_bin.8  | 91.55 | 1.58 | 99  | 44.9 | Clostridiales      | 44.9 | 2.57 |
| Sample_T2C_bin.39  | 80.02 | 3.24 | 25  | 27.1 | Clostridiales      | 27.1 | 1.75 |
| Sample_T17C_bin.7  | 99.36 | 0.00 | 34  | 42.4 | Clostridiales      | 42.4 | 2.70 |
| Sample_T3C_bin.19  | 96.88 | 0.67 | 141 | 42.1 | Clostridiales      | 42.1 | 2.58 |
| Sample_C2B_bin.15  | 93.95 | 0.45 | 77  | 58.4 | Clostridiales      | 58.4 | 2.09 |
| Sample_T7C_bin.1   | 91.50 | 3.06 | 149 | 46.8 | Lachnospiraceae    | 46.8 | 2.89 |
| Sample_C10C_bin.27 | 89.93 | 0.67 | 33  | 44   | Clostridiales      | 44   | 2.71 |
| Sample_C10C_bin.24 | 95.01 | 1.58 | 44  | 40.9 | Clostridiales      | 40.9 | 3.43 |
| Sample_C10C_bin.25 | 98.63 | 2.01 | 46  | 37.3 | Clostridiales      | 37.3 | 2.77 |
| Sample_C10C_bin.23 | 98.65 | 2.13 | 79  | 38.8 | Clostridiales      | 38.8 | 2.25 |
| Sample_T7C_bin.5   | 84.62 | 1.53 | 282 | 62.7 | Clostridiales      | 62.7 | 1.68 |
| Sample_C10C_bin.29 | 96.62 | 0.00 | 45  | 41.6 | Clostridiales      | 41.6 | 2.95 |

|                    |       |      |     |      |                    |      |      |
|--------------------|-------|------|-----|------|--------------------|------|------|
| Sample_C10A_bin.44 | 94.20 | 0.97 | 52  | 47.2 | Lachnospiraceae    | 47.2 | 2.99 |
| Sample_T7C_bin.6   | 90.63 | 0.73 | 247 | 59.4 | Clostridiales      | 59.4 | 1.76 |
| Sample_T7C_bin.9   | 98.10 | 0.65 | 117 | 48.5 | Firmicutes         | 48.5 | 2.05 |
| Sample_T7C_bin.8   | 90.35 | 1.70 | 66  | 59   | Clostridiales      | 59   | 1.92 |
| Sample_T15A_bin.15 | 96.61 | 1.69 | 41  | 45.2 | Lachnospiraceae    | 45.2 | 2.38 |
| Sample_T17B_bin.10 | 93.78 | 0.62 | 131 | 62.1 | Proteobacteria     | 62.1 | 2.27 |
| Sample_T17B_bin.12 | 97.58 | 0.97 | 144 | 50.8 | Enterobacteriaceae | 50.8 | 4.45 |
| Sample_T17B_bin.13 | 99.68 | 1.03 | 36  | 49   | Clostridiales      | 49   | 2.93 |
| Sample_T17B_bin.15 | 98.83 | 1.17 | 57  | 43.1 | Lachnospiraceae    | 43.1 | 2.84 |
| Sample_T17B_bin.16 | 86.39 | 0.00 | 748 | 49.8 | Clostridiales      | 49.8 | 5.22 |
| Sample_T17B_bin.17 | 83.14 | 0.00 | 364 | 29.2 | Bacteria           | 29.2 | 1.86 |
| Sample_T17B_bin.18 | 96.04 | 0.63 | 249 | 40.9 | Clostridiales      | 40.9 | 3.94 |
| Sample_C2B_bin.18  | 96.09 | 1.90 | 193 | 48.5 | Clostridiales      | 48.5 | 2.75 |
| Sample_C2B_bin.19  | 84.04 | 2.66 | 286 | 47.5 | Bacteroidales      | 47.5 | 3.44 |
| Sample_C1B_bin.51  | 99.60 | 2.05 | 80  | 44.1 | Selenomonadales    | 44.1 | 2.31 |
| Sample_C1B_bin.50  | 91.07 | 3.32 | 98  | 41.6 | Clostridiales      | 41.6 | 4.02 |
| Sample_C1B_bin.53  | 98.63 | 0.00 | 52  | 42.7 | Clostridiales      | 42.7 | 2.86 |
| Sample_C1B_bin.52  | 91.98 | 1.20 | 63  | 55.1 | Bacteroidetes      | 55.1 | 1.91 |
| Sample_T14A_bin.7  | 94.30 | 1.90 | 91  | 44.8 | Clostridiales      | 44.8 | 3.06 |
| Sample_C1B_bin.57  | 93.26 | 2.35 | 134 | 57.8 | Clostridiales      | 57.8 | 2.07 |
| Sample_C1B_bin.56  | 97.31 | 0.00 | 34  | 37.2 | Clostridiales      | 37.2 | 2.57 |
| Sample_T14C_bin.25 | 91.49 | 0.67 | 265 | 37.6 | Clostridiales      | 37.6 | 2.40 |
| Sample_T2C_bin.41  | 99.98 | 1.50 | 26  | 43.5 | Selenomonadales    | 43.5 | 2.57 |
| Sample_T2C_bin.40  | 92.57 | 2.80 | 192 | 49.4 | Clostridiales      | 49.4 | 1.83 |
| Sample_T2C_bin.47  | 94.42 | 1.63 | 103 | 41.4 | Lachnospiraceae    | 41.4 | 3.22 |
| Sample_T2C_bin.46  | 98.38 | 0.00 | 191 | 43.4 | Bacteria           | 43.4 | 3.59 |
| Sample_T2C_bin.45  | 98.65 | 1.01 | 21  | 33.1 | Clostridiales      | 33.1 | 2.47 |
| Sample_T14C_bin.22 | 97.82 | 1.28 | 313 | 43.6 | Lachnospiraceae    | 43.6 | 2.86 |
| Sample_T3A_bin.26  | 83.62 | 2.92 | 46  | 43.4 | Lachnospiraceae    | 43.4 | 2.40 |
| Sample_T2C_bin.49  | 99.36 | 2.11 | 138 | 31.2 | Firmicutes         | 31.2 | 2.59 |
| Sample_T2C_bin.48  | 92.72 | 0.96 | 68  | 59.2 | Bacteroidetes      | 59.2 | 2.77 |
| Sample_T3A_bin.22  | 98.63 | 0.23 | 36  | 56.7 | Bifidobacteriaceae | 56.7 | 2.19 |
| Sample_T3A_bin.23  | 98.94 | 0.63 | 192 | 48   | Clostridiales      | 48   | 3.02 |
| Sample_T3A_bin.20  | 80.79 | 0.00 | 151 | 41.6 | Lachnospiraceae    | 41.6 | 1.76 |
| Sample_T3A_bin.21  | 98.84 | 0.00 | 68  | 46   | Bacteroidales      | 46   | 4.91 |
| Sample_C12A_bin.44 | 94.51 | 2.12 | 198 | 45   | Bacteroidales      | 45   | 3.78 |
| Sample_T16C_bin.13 | 93.45 | 0.56 | 72  | 42.1 | Bacteroidales      | 42.1 | 3.31 |
| Sample_T16C_bin.10 | 99.32 | 0.00 | 29  | 35.7 | Clostridiales      | 35.7 | 2.93 |
| Sample_T16C_bin.16 | 92.62 | 0.02 | 240 | 37.7 | Clostridiales      | 37.7 | 2.37 |

|                    |        |      |     |      |                    |      |      |
|--------------------|--------|------|-----|------|--------------------|------|------|
| Sample_T16C_bin.17 | 92.41  | 2.76 | 303 | 44.2 | Selenomonadales    | 44.2 | 2.02 |
| Sample_T16C_bin.14 | 98.79  | 0.48 | 33  | 58.4 | Bacteroidetes      | 58.4 | 3.16 |
| Sample_T16C_bin.15 | 96.42  | 0.67 | 115 | 38.3 | Clostridiales      | 38.3 | 3.06 |
| Sample_C8A_bin.7   | 87.12  | 0.37 | 134 | 47.2 | Bacteroidales      | 47.2 | 3.42 |
| Sample_T4C_bin.4   | 97.31  | 0.00 | 165 | 52.8 | Clostridiales      | 52.8 | 2.09 |
| Sample_T4C_bin.5   | 98.79  | 0.41 | 32  | 41.7 | Lachnospiraceae    | 41.7 | 2.66 |
| Sample_T4C_bin.6   | 100.00 | 0.81 | 40  | 59.8 | Actinobacteria     | 59.8 | 2.24 |
| Sample_C8A_bin.6   | 94.35  | 2.85 | 270 | 42   | Bacteroidales      | 42   | 3.82 |
| Sample_T4C_bin.1   | 98.83  | 0.00 | 58  | 34.7 | Lactobacillus      | 34.7 | 1.93 |
| Sample_T4C_bin.2   | 83.66  | 0.58 | 223 | 42   | Lachnospiraceae    | 42   | 2.00 |
| Sample_T4C_bin.3   | 97.69  | 0.92 | 28  | 62.9 | Bifidobacteriaceae | 62.9 | 2.14 |
| Sample_T12B_bin.26 | 90.37  | 0.47 | 75  | 44   | Bacteroidales      | 44   | 3.65 |
| Sample_C8A_bin.1   | 91.55  | 2.30 | 69  | 59.3 | Clostridiales      | 59.3 | 1.84 |
| Sample_T4B_bin.34  | 85.25  | 3.08 | 520 | 46.4 | Bacteroidales      | 46.4 | 3.25 |
| Sample_T2C_bin.44  | 99.32  | 0.00 | 33  | 44   | Clostridiales      | 44   | 2.82 |
| Sample_T4C_bin.9   | 93.64  | 1.29 | 136 | 44.9 | Clostridiales      | 44.9 | 2.91 |
| Sample_C8A_bin.3   | 97.35  | 0.00 | 111 | 37.3 | Clostridiales      | 37.3 | 2.67 |
| Sample_C12C_bin.39 | 95.30  | 0.00 | 40  | 37.5 | Clostridiales      | 37.5 | 2.58 |
| Sample_C12C_bin.37 | 99.40  | 1.10 | 57  | 46.7 | Selenomonadales    | 46.7 | 2.36 |
| Sample_C12C_bin.36 | 98.13  | 1.17 | 128 | 58.2 | Clostridiales      | 58.2 | 3.02 |
| Sample_C12C_bin.35 | 97.27  | 0.00 | 27  | 51.7 | Clostridiales      | 51.7 | 2.27 |
| Sample_C12C_bin.33 | 91.69  | 0.47 | 489 | 44.4 | Bacteroidales      | 44.4 | 3.17 |
| Sample_C12C_bin.32 | 96.63  | 1.75 | 70  | 54.2 | Bacteroidetes      | 54.2 | 2.68 |
| Sample_C12C_bin.30 | 92.61  | 0.94 | 95  | 54.9 | Clostridiales      | 54.9 | 2.64 |
| Sample_C6B_bin.58  | 97.98  | 0.00 | 26  | 52.1 | Clostridiales      | 52.1 | 2.43 |
| Sample_C6B_bin.59  | 85.29  | 1.12 | 168 | 42.4 | Bacteroidales      | 42.4 | 3.04 |
| Sample_T4A_bin.19  | 98.73  | 0.02 | 98  | 48.3 | Firmicutes         | 48.3 | 2.13 |
| Sample_T4A_bin.14  | 99.32  | 0.67 | 220 | 40.1 | Clostridiales      | 40.1 | 2.33 |
| Sample_C6B_bin.53  | 100.00 | 0.23 | 20  | 56.2 | Bifidobacteriaceae | 56.2 | 2.20 |
| Sample_T4A_bin.16  | 100.00 | 0.81 | 43  | 59.8 | Actinobacteria     | 59.8 | 2.22 |
| Sample_T4A_bin.17  | 95.65  | 1.18 | 72  | 46.7 | Bacteroidales      | 46.7 | 4.03 |
| Sample_T4A_bin.10  | 95.97  | 0.08 | 75  | 58.5 | Clostridiales      | 58.5 | 2.25 |
| Sample_T4A_bin.11  | 96.09  | 0.34 | 258 | 58.6 | Clostridiales      | 58.6 | 2.36 |
| Sample_T4A_bin.12  | 90.61  | 4.70 | 45  | 44.9 | Clostridiales      | 44.9 | 2.57 |
| Sample_T4A_bin.13  | 99.27  | 0.48 | 28  | 41.5 | Lachnospiraceae    | 41.5 | 2.76 |
| Sample_T7B_bin.27  | 81.49  | 0.68 | 66  | 59.4 | Clostridiales      | 59.4 | 1.94 |
| Sample_T7B_bin.26  | 96.15  | 2.40 | 43  | 54.1 | Bacteroidetes      | 54.1 | 2.22 |
| Sample_T7B_bin.24  | 93.98  | 0.36 | 335 | 36.1 | Clostridiales      | 36.1 | 2.38 |
| Sample_T7B_bin.22  | 98.73  | 2.11 | 82  | 48.1 | Clostridiales      | 48.1 | 3.01 |

|                    |        |      |     |      |                    |      |      |
|--------------------|--------|------|-----|------|--------------------|------|------|
| Sample_T7B_bin.21  | 93.71  | 0.39 | 73  | 43.6 | Bacteroidales      | 43.6 | 2.82 |
| Sample_T7B_bin.20  | 93.75  | 2.40 | 360 | 59.5 | Bacteroidetes      | 59.5 | 2.71 |
| Sample_T7B_bin.29  | 98.32  | 0.00 | 15  | 41.3 | Clostridiales      | 41.3 | 2.57 |
| Sample_T7B_bin.28  | 99.55  | 0.00 | 48  | 60.4 | Bifidobacteriaceae | 60.4 | 1.91 |
| Sample_T4A_bin.41  | 99.54  | 0.68 | 37  | 57   | Bifidobacteriaceae | 57   | 2.43 |
| Sample_C10A_bin.36 | 99.54  | 1.25 | 36  | 56.4 | Bifidobacteriaceae | 56.4 | 2.19 |
| Sample_C10A_bin.35 | 99.51  | 0.48 | 51  | 46.2 | Bacteroidetes      | 46.2 | 2.61 |
| Sample_C10A_bin.33 | 98.27  | 4.47 | 68  | 57.7 | Bacteria           | 57.7 | 3.26 |
| Sample_C10A_bin.31 | 98.75  | 0.63 | 99  | 55.6 | Proteobacteria     | 55.6 | 2.19 |
| Sample_C10A_bin.30 | 96.15  | 1.97 | 24  | 54.9 | Bacteroidetes      | 54.9 | 2.00 |
| Sample_C10A_bin.39 | 95.30  | 0.00 | 33  | 36.4 | Clostridiales      | 36.4 | 1.80 |
| Sample_C10A_bin.38 | 98.99  | 0.00 | 56  | 45.2 | Clostridiales      | 45.2 | 2.75 |
| Sample_C3A_bin.58  | 86.01  | 1.48 | 37  | 59.4 | Clostridiales      | 59.4 | 1.50 |
| Sample_T3C_bin.15  | 99.51  | 1.21 | 41  | 41.9 | Lachnospiraceae    | 41.9 | 2.57 |
| Sample_T3C_bin.17  | 96.66  | 1.15 | 44  | 46.2 | Bacteroidales      | 46.2 | 4.20 |
| Sample_T3C_bin.16  | 97.41  | 0.62 | 332 | 55.2 | Proteobacteria     | 55.2 | 2.76 |
| Sample_T3C_bin.11  | 81.46  | 1.48 | 68  | 48.2 | Clostridiales      | 48.2 | 1.65 |
| Sample_T3C_bin.13  | 99.03  | 0.96 | 134 | 54.6 | Bacteroidetes      | 54.6 | 2.24 |
| Sample_T4A_bin.9   | 99.03  | 0.00 | 127 | 57.6 | Bacteroidetes      | 57.6 | 3.65 |
| Sample_T4A_bin.6   | 93.07  | 0.34 | 100 | 46.4 | Prevotella         | 46.4 | 3.33 |
| Sample_T13A_bin.28 | 96.98  | 3.31 | 112 | 47.2 | Lachnospiraceae    | 47.2 | 3.15 |
| Sample_T4A_bin.2   | 86.70  | 0.00 | 103 | 43.4 | Bacteria           | 43.4 | 3.34 |
| Sample_T3C_bin.18  | 100.00 | 1.27 | 99  | 31.4 | Firmicutes         | 31.4 | 2.32 |
| Sample_T4A_bin.1   | 99.09  | 1.36 | 24  | 56.5 | Clostridiales      | 56.5 | 2.27 |
| Sample_T12C_bin.29 | 87.91  | 0.67 | 23  | 59.3 | Clostridiales      | 59.3 | 2.08 |
| Sample_T12C_bin.28 | 87.47  | 0.82 | 66  | 40.7 | Bacteroidales      | 40.7 | 2.80 |
| Sample_T12C_bin.26 | 87.76  | 3.37 | 194 | 59.3 | Bacteroidetes      | 59.3 | 2.74 |
| Sample_T12C_bin.25 | 97.10  | 2.29 | 56  | 41.6 | Lachnospiraceae    | 41.6 | 2.65 |
| Sample_T12C_bin.24 | 93.62  | 2.42 | 132 | 47.2 | Lachnospiraceae    | 47.2 | 2.99 |
| Sample_T12C_bin.23 | 100.00 | 0.63 | 79  | 31.4 | Firmicutes         | 31.4 | 2.34 |
| Sample_C3A_bin.50  | 98.31  | 2.40 | 88  | 58.5 | Bacteroidetes      | 58.5 | 3.22 |
| Sample_T12C_bin.20 | 97.18  | 0.34 | 159 | 44.1 | Clostridiales      | 44.1 | 2.64 |
| Sample_T13A_bin.27 | 88.37  | 0.45 | 518 | 45.9 | Bacteroidales      | 45.9 | 3.62 |
| Sample_T13A_bin.22 | 93.28  | 0.00 | 290 | 51   | Clostridiales      | 51   | 2.44 |
| Sample_C13C_bin.6  | 100.00 | 0.00 | 25  | 37.2 | Lactobacillales    | 37.2 | 2.08 |
| Sample_C13C_bin.7  | 98.65  | 1.51 | 30  | 36.2 | Clostridiales      | 36.2 | 2.64 |
| Sample_C13C_bin.4  | 89.63  | 0.63 | 281 | 41.8 | Clostridiales      | 41.8 | 2.86 |
| Sample_C13C_bin.5  | 99.03  | 0.16 | 33  | 41.6 | Lachnospiraceae    | 41.6 | 2.62 |
| Sample_C13C_bin.2  | 99.38  | 2.17 | 61  | 43.6 | Selenomonadales    | 43.6 | 2.45 |

|                    |        |      |     |      |                    |      |      |
|--------------------|--------|------|-----|------|--------------------|------|------|
| Sample_C13C_bin.1  | 81.29  | 0.38 | 94  | 45.2 | Clostridiales      | 45.2 | 1.48 |
| Sample_C13C_bin.8  | 97.98  | 0.73 | 84  | 35.9 | Clostridiales      | 35.9 | 2.65 |
| Sample_C13C_bin.9  | 99.41  | 0.19 | 46  | 43.3 | Lachnospiraceae    | 43.3 | 2.75 |
| Sample_T1A_bin.11  | 99.05  | 0.47 | 103 | 33.6 | Bacteria           | 33.6 | 2.35 |
| Sample_T6A_bin.16  | 92.70  | 1.79 | 266 | 41.2 | Clostridiales      | 41.2 | 2.98 |
| Sample_C14B_bin.8  | 96.28  | 1.18 | 95  | 45.4 | Prevotella         | 45.4 | 3.19 |
| Sample_C3B_bin.28  | 100.00 | 0.00 | 45  | 55.6 | Proteobacteria     | 55.6 | 2.84 |
| Sample_T6A_bin.17  | 88.99  | 1.01 | 174 | 39   | Clostridiales      | 39   | 1.79 |
| Sample_C14B_bin.2  | 99.25  | 2.78 | 40  | 44.4 | Bacteroidales      | 44.4 | 3.65 |
| Sample_C3B_bin.27  | 97.98  | 0.67 | 29  | 33.2 | Clostridiales      | 33.2 | 2.19 |
| Sample_C14B_bin.1  | 100.00 | 2.11 | 34  | 60.4 | Bifidobacteriaceae | 60.4 | 1.96 |
| Sample_C3B_bin.23  | 98.65  | 0.00 | 21  | 44.4 | Clostridiales      | 44.4 | 2.62 |
| Sample_C3B_bin.20  | 98.10  | 0.65 | 111 | 48.5 | Firmicutes         | 48.5 | 2.16 |
| Sample_T8A_bin.32  | 86.79  | 0.34 | 239 | 49.9 | Clostridiales      | 49.9 | 2.00 |
| Sample_T8A_bin.33  | 97.30  | 0.84 | 205 | 33.7 | Bacteria           | 33.7 | 3.16 |
| Sample_T8A_bin.30  | 86.53  | 2.13 | 316 | 46.4 | Bacteroidales      | 46.4 | 3.30 |
| Sample_T8A_bin.36  | 82.82  | 2.75 | 49  | 47.1 | Bacteroidales      | 47.1 | 3.53 |
| Sample_T8A_bin.37  | 99.03  | 0.36 | 52  | 42.8 | Lachnospiraceae    | 42.8 | 3.44 |
| Sample_T8A_bin.34  | 95.80  | 1.01 | 214 | 36.8 | Clostridiales      | 36.8 | 1.79 |
| Sample_T8A_bin.35  | 84.62  | 0.10 | 63  | 41.7 | Lachnospiraceae    | 41.7 | 2.51 |
| Sample_T8A_bin.38  | 89.83  | 3.74 | 223 | 57.6 | Clostridiales      | 57.6 | 2.62 |
| Sample_T8A_bin.39  | 83.86  | 0.63 | 114 | 49.2 | Clostridiales      | 49.2 | 2.15 |
| Sample_T7A_bin.19  | 97.45  | 2.31 | 187 | 45.4 | Bacteroidales      | 45.4 | 4.08 |
| Sample_T7A_bin.17  | 94.34  | 0.50 | 279 | 43.4 | Bacteroidales      | 43.4 | 3.02 |
| Sample_T7A_bin.13  | 89.42  | 3.95 | 302 | 59.4 | Bifidobacteriaceae | 59.4 | 1.87 |
| Sample_T7A_bin.10  | 98.63  | 0.00 | 220 | 42.8 | Clostridiales      | 42.8 | 2.86 |
| Sample_C3C_bin.6   | 94.47  | 0.00 | 68  | 58.6 | Clostridiales      | 58.6 | 2.23 |
| Sample_T17C_bin.8  | 96.89  | 0.62 | 84  | 62   | Proteobacteria     | 62   | 2.41 |
| Sample_T3A_bin.29  | 100.00 | 0.63 | 71  | 31.4 | Firmicutes         | 31.4 | 2.34 |
| Sample_T14A_bin.51 | 94.34  | 0.34 | 113 | 48.5 | Lachnospiraceae    | 48.5 | 2.84 |
| Sample_T18B_bin.15 | 99.32  | 3.18 | 109 | 44.8 | Prevotella         | 44.8 | 3.92 |
| Sample_T6C_bin.38  | 99.17  | 1.31 | 114 | 60   | Bifidobacteriaceae | 60   | 2.17 |
| Sample_T6C_bin.39  | 99.55  | 0.00 | 36  | 60.4 | Bifidobacteriaceae | 60.4 | 1.92 |
| Sample_T6C_bin.36  | 98.65  | 0.04 | 39  | 51.4 | Clostridiales      | 51.4 | 2.64 |
| Sample_T6C_bin.34  | 97.98  | 0.00 | 107 | 38.2 | Clostridiales      | 38.2 | 1.85 |
| Sample_T6C_bin.35  | 92.99  | 1.57 | 183 | 59.3 | Clostridiales      | 59.3 | 1.89 |
| Sample_T6C_bin.32  | 99.25  | 0.23 | 80  | 45.4 | Bacteroidales      | 45.4 | 3.42 |
| Sample_T6C_bin.33  | 95.91  | 2.72 | 16  | 60.7 | Clostridiales      | 60.7 | 2.38 |
| Sample_T6C_bin.30  | 88.35  | 3.71 | 74  | 58   | Clostridiales      | 58   | 2.71 |

|                    |        |      |     |      |                     |      |      |
|--------------------|--------|------|-----|------|---------------------|------|------|
| Sample_C14A_bin.21 | 95.97  | 0.00 | 55  | 52.3 | Clostridiales       | 52.3 | 2.45 |
| Sample_C9C_bin.17  | 95.09  | 0.78 | 314 | 44.9 | Clostridiales       | 44.9 | 2.51 |
| Sample_C9C_bin.14  | 98.79  | 1.44 | 45  | 59.2 | Bacteroidetes       | 59.2 | 2.81 |
| Sample_C9C_bin.15  | 84.02  | 0.50 | 605 | 60.1 | Deltaproteobacteria | 60.1 | 3.43 |
| Sample_C9C_bin.12  | 98.23  | 0.51 | 149 | 45.5 | Bacteroidales       | 45.5 | 3.76 |
| Sample_C9C_bin.11  | 87.52  | 2.04 | 224 | 59.9 | Clostridiales       | 59.9 | 1.93 |
| Sample_C3C_bin.1   | 98.65  | 0.00 | 40  | 36.6 | Clostridiales       | 36.6 | 1.90 |
| Sample_C9C_bin.18  | 99.98  | 1.50 | 26  | 43.7 | Selenomonadales     | 43.7 | 2.38 |
| Sample_C9C_bin.19  | 87.56  | 2.95 | 334 | 57.9 | Clostridiales       | 57.9 | 2.10 |
| Sample_T7C_bin.21  | 99.51  | 0.96 | 18  | 54.2 | Bacteroidetes       | 54.2 | 2.22 |
| Sample_T7C_bin.22  | 98.65  | 0.00 | 54  | 37.7 | Clostridiales       | 37.7 | 2.10 |
| Sample_T7C_bin.23  | 99.32  | 1.34 | 180 | 41.4 | Clostridiales       | 41.4 | 2.51 |
| Sample_T16B_bin.50 | 95.56  | 2.37 | 305 | 41.2 | Clostridiales       | 41.2 | 3.54 |
| Sample_C6B_bin.20  | 95.97  | 3.58 | 116 | 37.4 | Clostridiales       | 37.4 | 2.28 |
| Sample_T12B_bin.10 | 97.09  | 0.00 | 291 | 44   | Clostridiales       | 44   | 1.88 |
| Sample_C6B_bin.27  | 93.87  | 2.04 | 216 | 56.3 | Clostridiales       | 56.3 | 2.37 |
| Sample_C10B_bin.18 | 99.32  | 0.67 | 32  | 40.7 | Clostridiales       | 40.7 | 2.20 |
| Sample_C11B_bin.47 | 88.97  | 1.46 | 713 | 52.1 | Enterobacteriaceae  | 52.1 | 4.61 |
| Sample_C11B_bin.44 | 89.95  | 2.54 | 62  | 47.3 | Lachnospiraceae     | 47.3 | 2.56 |
| Sample_C11B_bin.45 | 91.05  | 1.85 | 250 | 41.2 | Clostridiales       | 41.2 | 1.78 |
| Sample_C14C_bin.30 | 99.54  | 0.11 | 103 | 59.7 | Bifidobacteriaceae  | 59.7 | 2.08 |
| Sample_C10B_bin.10 | 99.32  | 0.00 | 94  | 43.9 | Clostridiales       | 43.9 | 2.85 |
| Sample_C10B_bin.12 | 99.98  | 1.50 | 96  | 44.2 | Selenomonadales     | 44.2 | 2.14 |
| Sample_C6B_bin.24  | 92.61  | 2.01 | 49  | 58   | Clostridiales       | 58   | 2.78 |
| Sample_C10B_bin.14 | 94.73  | 0.19 | 250 | 41.3 | Bacteroidales       | 41.3 | 4.58 |
| Sample_C10B_bin.15 | 82.04  | 0.50 | 60  | 46.8 | Bacteroidales       | 46.8 | 2.87 |
| Sample_C11B_bin.49 | 98.65  | 0.40 | 24  | 44   | Clostridiales       | 44   | 2.80 |
| Sample_C11C_bin.11 | 91.47  | 2.07 | 17  | 41.3 | Bacteroidales       | 41.3 | 5.09 |
| Sample_T3A_bin.24  | 98.65  | 3.02 | 175 | 37.3 | Clostridiales       | 37.3 | 2.39 |
| Sample_C11C_bin.16 | 88.13  | 1.34 | 268 | 38.3 | Clostridiales       | 38.3 | 1.59 |
| Sample_C8B_bin.33  | 100.00 | 1.27 | 208 | 31.4 | Firmicutes          | 31.4 | 2.69 |
| Sample_C9B_bin.31  | 97.65  | 0.89 | 73  | 57.3 | Clostridiales       | 57.3 | 2.38 |
| Sample_C11C_bin.15 | 98.06  | 0.48 | 93  | 41.8 | Lachnospiraceae     | 41.8 | 2.65 |
| Sample_C8C_bin.38  | 96.09  | 0.67 | 158 | 38.4 | Clostridiales       | 38.4 | 2.63 |
| Sample_T14A_bin.18 | 98.13  | 0.83 | 144 | 62.3 | Proteobacteria      | 62.3 | 2.40 |
| Sample_C2A_bin.64  | 97.76  | 1.36 | 120 | 51.8 | Clostridiales       | 51.8 | 2.30 |
| Sample_C2A_bin.65  | 84.85  | 0.62 | 256 | 48.3 | Clostridiales       | 48.3 | 1.63 |
| Sample_C2A_bin.62  | 86.77  | 1.45 | 213 | 45.2 | Lachnospiraceae     | 45.2 | 2.38 |
| Sample_C2A_bin.63  | 83.79  | 2.01 | 295 | 47.2 | Clostridiales       | 47.2 | 1.78 |

|                    |       |      |     |      |                    |      |      |
|--------------------|-------|------|-----|------|--------------------|------|------|
| Sample_C2A_bin.60  | 88.03 | 0.85 | 63  | 32.7 | Bacteria           | 32.7 | 2.16 |
| Sample_C8C_bin.35  | 95.23 | 0.00 | 51  | 59.9 | Clostridiales      | 59.9 | 2.64 |
| Sample_C13C_bin.14 | 97.50 | 0.12 | 269 | 49.5 | Bacteroidales      | 49.5 | 2.70 |
| Sample_T10B_bin.13 | 93.29 | 1.18 | 146 | 46   | Bacteroidales      | 46   | 3.21 |
| Sample_T1A_bin.13  | 98.73 | 0.02 | 94  | 48.5 | Firmicutes         | 48.5 | 2.06 |
| Sample_C8C_bin.30  | 94.64 | 0.17 | 98  | 60.5 | Clostridiales      | 60.5 | 2.09 |
| Sample_C10C_bin.34 | 92.90 | 3.38 | 253 | 46.3 | Bacteroidales      | 46.3 | 3.89 |
| Sample_C5A_bin.9   | 83.42 | 2.75 | 342 | 41.1 | Clostridiales      | 41.1 | 2.06 |
| Sample_C8A_bin.5   | 99.84 | 0.34 | 34  | 56.3 | Bifidobacteriaceae | 56.3 | 2.34 |
| Sample_C10C_bin.30 | 98.43 | 1.34 | 102 | 40.8 | Clostridiales      | 40.8 | 2.80 |
| Sample_C10C_bin.33 | 96.99 | 4.44 | 114 | 41.7 | Bacteroidales      | 41.7 | 5.09 |
| Sample_T10B_bin.17 | 97.35 | 0.00 | 52  | 41.9 | Clostridiales      | 41.9 | 2.75 |
| Sample_C8C_bin.32  | 99.32 | 1.01 | 34  | 40.6 | Clostridiales      | 40.6 | 2.21 |
| Sample_C14A_bin.1  | 97.02 | 1.63 | 35  | 58.6 | Clostridiales      | 58.6 | 2.69 |
| Sample_C14A_bin.2  | 82.27 | 1.34 | 138 | 54.5 | Clostridiales      | 54.5 | 1.58 |
| Sample_C14A_bin.7  | 97.29 | 3.27 | 98  | 45.1 | Prevotella         | 45.1 | 3.33 |
| Sample_C14A_bin.6  | 95.06 | 1.25 | 256 | 57.8 | Proteobacteria     | 57.8 | 2.14 |
| Sample_C14A_bin.9  | 99.51 | 0.05 | 86  | 41   | Lachnospiraceae    | 41   | 3.12 |
| Sample_C14A_bin.8  | 97.94 | 0.00 | 46  | 43.1 | Clostridiales      | 43.1 | 2.48 |
| Sample_C3B_bin.29  | 97.31 | 1.34 | 14  | 53.6 | Clostridiales      | 53.6 | 1.92 |
| Sample_C8C_bin.7   | 89.84 | 1.34 | 150 | 40.9 | Clostridiales      | 40.9 | 2.38 |
| Sample_C8C_bin.6   | 99.98 | 2.10 | 25  | 43.6 | Selenomonadales    | 43.6 | 2.41 |
| Sample_C8C_bin.5   | 98.10 | 0.17 | 289 | 41.8 | Clostridiales      | 41.8 | 2.93 |
| Sample_C8C_bin.4   | 98.87 | 0.00 | 81  | 41.7 | Lachnospiraceae    | 41.7 | 2.73 |
| Sample_C8C_bin.2   | 97.98 | 0.34 | 22  | 46.1 | Clostridiales      | 46.1 | 2.91 |
| Sample_C8C_bin.1   | 85.27 | 2.75 | 94  | 57.2 | Clostridiales      | 57.2 | 3.12 |
| Sample_C4C_bin.51  | 82.66 | 1.33 | 58  | 27.2 | Bacteria           | 27.2 | 1.10 |
| Sample_C4C_bin.50  | 98.10 | 2.85 | 91  | 40.9 | Clostridiales      | 40.9 | 3.71 |
| Sample_C8C_bin.9   | 91.50 | 0.75 | 149 | 42.1 | Bacteroidales      | 42.1 | 4.80 |
| Sample_C2B_bin.27  | 99.24 | 0.00 | 43  | 43.4 | Bacteroidales      | 43.4 | 3.16 |
| Sample_C2B_bin.26  | 92.13 | 1.61 | 121 | 43   | Clostridia         | 43   | 1.37 |
| Sample_C2B_bin.25  | 91.57 | 2.57 | 22  | 25.9 | Bacteria           | 25.9 | 1.37 |
| Sample_T10B_bin.18 | 89.46 | 1.47 | 535 | 48.9 | Bacteroidales      | 48.9 | 3.56 |
| Sample_C2B_bin.22  | 98.83 | 0.00 | 60  | 41.8 | Lachnospiraceae    | 41.8 | 2.42 |
| Sample_C2B_bin.29  | 81.77 | 1.43 | 578 | 43.8 | Bacteria           | 43.8 | 2.94 |
| Sample_C2B_bin.28  | 96.58 | 1.63 | 244 | 63.1 | Proteobacteria     | 63.1 | 2.08 |
| Sample_C1B_bin.41  | 88.46 | 0.00 | 73  | 57.6 | Clostridiales      | 57.6 | 1.92 |
| Sample_C1B_bin.45  | 95.07 | 2.01 | 164 | 37.3 | Clostridiales      | 37.3 | 2.26 |
| Sample_C1B_bin.48  | 94.21 | 1.36 | 196 | 56.6 | Clostridiales      | 56.6 | 2.22 |

|                    |        |      |     |      |                    |      |      |
|--------------------|--------|------|-----|------|--------------------|------|------|
| Sample_T14C_bin.18 | 97.98  | 0.34 | 20  | 44.1 | Clostridiales      | 44.1 | 2.01 |
| Sample_T14C_bin.19 | 99.51  | 1.44 | 68  | 54.7 | Bacteroidetes      | 54.7 | 2.32 |
| Sample_T2C_bin.50  | 86.28  | 0.67 | 107 | 62.2 | Clostridiales      | 62.2 | 1.71 |
| Sample_T2C_bin.52  | 98.31  | 1.69 | 12  | 45.5 | Prevotella         | 45.5 | 3.85 |
| Sample_T14C_bin.10 | 99.51  | 0.00 | 121 | 41.3 | Lachnospiraceae    | 41.3 | 3.04 |
| Sample_T14C_bin.11 | 90.64  | 1.10 | 58  | 40.3 | Bacteroidales      | 40.3 | 3.24 |
| Sample_T14C_bin.12 | 98.66  | 0.09 | 63  | 60.4 | Bifidobacteriaceae | 60.4 | 1.92 |
| Sample_T14C_bin.15 | 93.13  | 1.56 | 229 | 60.2 | Bacteroidetes      | 60.2 | 2.61 |
| Sample_T14C_bin.17 | 95.59  | 0.87 | 59  | 46.7 | Bacteroidales      | 46.7 | 3.91 |
| Sample_T3A_bin.13  | 95.58  | 0.24 | 98  | 42.7 | Bacteroides        | 42.7 | 5.67 |
| Sample_T3A_bin.12  | 98.74  | 2.07 | 75  | 39.8 | Streptococcus      | 39.8 | 1.96 |
| Sample_T3A_bin.11  | 94.86  | 0.00 | 79  | 57.7 | Clostridiales      | 57.7 | 2.09 |
| Sample_T3A_bin.10  | 95.91  | 0.00 | 85  | 58   | Clostridiales      | 58   | 3.37 |
| Sample_T3A_bin.16  | 94.12  | 0.58 | 462 | 45.2 | Bacteroidales      | 45.2 | 4.48 |
| Sample_T3A_bin.14  | 96.97  | 0.34 | 464 | 47.8 | Clostridiales      | 47.8 | 2.09 |
| Sample_T18A_bin.13 | 97.98  | 0.00 | 29  | 49.3 | Clostridiales      | 49.3 | 2.31 |
| Sample_T18A_bin.10 | 98.65  | 0.79 | 238 | 35.8 | Clostridiales      | 35.8 | 2.67 |
| Sample_T18A_bin.11 | 89.28  | 1.01 | 37  | 49.7 | Clostridiales      | 49.7 | 2.25 |
| Sample_T18A_bin.16 | 100.00 | 0.00 | 90  | 48.9 | Proteobacteria     | 48.9 | 2.32 |
| Sample_T18A_bin.17 | 92.29  | 1.17 | 105 | 46.7 | Bacteroidales      | 46.7 | 3.20 |
| Sample_T18A_bin.15 | 85.33  | 1.24 | 70  | 46.3 | Bacteroidales      | 46.3 | 2.70 |
| Sample_C1B_bin.5   | 92.31  | 0.97 | 280 | 44.8 | Lachnospiraceae    | 44.8 | 2.72 |
| Sample_C1B_bin.4   | 98.86  | 0.00 | 269 | 54.1 | Bacteroidales      | 54.1 | 2.47 |
| Sample_C1B_bin.7   | 94.21  | 0.41 | 115 | 58.8 | Clostridiales      | 58.8 | 3.17 |
| Sample_C1B_bin.6   | 94.49  | 0.47 | 321 | 29.2 | Bacteria           | 29.2 | 2.27 |
| Sample_C1B_bin.1   | 91.13  | 1.48 | 191 | 62.3 | Clostridiales      | 62.3 | 1.91 |
| Sample_C1B_bin.3   | 94.63  | 0.00 | 51  | 36.3 | Clostridiales      | 36.3 | 2.39 |
| Sample_C1B_bin.2   | 83.84  | 2.55 | 24  | 59.3 | Clostridiales      | 59.3 | 1.81 |
| Sample_C1B_bin.9   | 87.99  | 2.53 | 55  | 45.3 | Clostridiales      | 45.3 | 2.51 |
| Sample_C1B_bin.8   | 98.65  | 0.00 | 28  | 37.7 | Clostridiales      | 37.7 | 2.20 |
| Sample_C2A_bin.9   | 86.54  | 0.79 | 325 | 46.6 | Clostridiales      | 46.6 | 2.55 |
| Sample_C2A_bin.8   | 98.79  | 1.44 | 27  | 54.5 | Bacteroidetes      | 54.5 | 2.09 |
| Sample_C2A_bin.3   | 98.14  | 2.42 | 60  | 46.6 | Bacteroidales      | 46.6 | 4.20 |
| Sample_T7B_bin.31  | 94.89  | 0.68 | 315 | 56.4 | Clostridiales      | 56.4 | 2.28 |
| Sample_T7B_bin.32  | 98.63  | 0.00 | 71  | 42.9 | Clostridiales      | 42.9 | 2.98 |
| Sample_T7B_bin.33  | 99.51  | 1.93 | 72  | 46.5 | Lachnospiraceae    | 46.5 | 3.12 |
| Sample_C2A_bin.7   | 86.91  | 4.64 | 456 | 41.3 | Clostridiales      | 41.3 | 2.66 |
| Sample_T7B_bin.35  | 82.75  | 2.53 | 412 | 44.3 | Clostridiales      | 44.3 | 2.79 |
| Sample_T7B_bin.36  | 99.32  | 4.17 | 116 | 44.5 | Prevotella         | 44.5 | 3.93 |



|                    |        |      |     |      |                    |      |      |
|--------------------|--------|------|-----|------|--------------------|------|------|
| Sample_C2A_bin.4   | 87.69  | 0.00 | 42  | 57.3 | Clostridiales      | 57.3 | 1.88 |
| Sample_T8B_bin.13  | 85.93  | 0.00 | 106 | 51   | Clostridiales      | 51   | 2.15 |
| Sample_T8B_bin.15  | 85.13  | 3.78 | 262 | 60.5 | Clostridiales      | 60.5 | 2.05 |
| Sample_T8B_bin.17  | 97.76  | 0.67 | 67  | 43   | Clostridiales      | 43   | 3.20 |
| Sample_C2C_bin.37  | 87.24  | 2.68 | 235 | 41.4 | Clostridiales      | 41.4 | 2.24 |
| Sample_C2C_bin.33  | 89.91  | 1.01 | 154 | 42.7 | Clostridia         | 42.7 | 1.37 |
| Sample_C2C_bin.32  | 99.36  | 1.90 | 232 | 31.2 | Firmicutes         | 31.2 | 2.61 |
| Sample_C2C_bin.31  | 99.51  | 0.48 | 67  | 41.5 | Lachnospiraceae    | 41.5 | 2.88 |
| Sample_C2C_bin.30  | 98.93  | 0.97 | 167 | 43.4 | Bacteroidales      | 43.4 | 3.09 |
| Sample_T16A_bin.21 | 99.53  | 0.00 | 80  | 60   | Bifidobacteriaceae | 60   | 2.38 |
| Sample_T16A_bin.20 | 94.11  | 3.60 | 22  | 57.9 | Clostridiales      | 57.9 | 2.25 |
| Sample_T16A_bin.22 | 100.00 | 0.41 | 184 | 57.3 | Enterobacteriaceae | 57.3 | 5.47 |
| Sample_C2C_bin.39  | 91.82  | 1.42 | 316 | 59   | Clostridiales      | 59   | 2.91 |
| Sample_C2C_bin.38  | 97.31  | 1.01 | 60  | 40.6 | Clostridiales      | 40.6 | 2.02 |
| Sample_C7B_bin.3   | 91.28  | 1.88 | 187 | 41.8 | Bacteroides        | 41.8 | 4.48 |
| Sample_C7B_bin.1   | 91.60  | 0.84 | 189 | 43.2 | Lachnospiraceae    | 43.2 | 2.04 |
| Sample_T14A_bin.33 | 90.26  | 2.18 | 284 | 37.5 | Clostridiales      | 37.5 | 2.05 |
| Sample_C7B_bin.7   | 99.51  | 0.96 | 30  | 54.3 | Bacteroidetes      | 54.3 | 2.33 |
| Sample_C7B_bin.4   | 97.31  | 0.00 | 39  | 43.3 | Clostridiales      | 43.3 | 2.10 |
| Sample_T14A_bin.38 | 84.86  | 1.24 | 60  | 47.3 | Bacteroidales      | 47.3 | 3.00 |
| Sample_T14A_bin.39 | 97.98  | 0.34 | 74  | 40.5 | Clostridiales      | 40.5 | 2.66 |
| Sample_C14A_bin.15 | 97.65  | 0.06 | 154 | 45   | Clostridiales      | 45   | 2.52 |
| Sample_T10C_bin.15 | 96.97  | 1.07 | 178 | 48.7 | Firmicutes         | 48.7 | 2.05 |
| Sample_C6C_bin.48  | 98.63  | 0.00 | 63  | 43.1 | Clostridiales      | 43.1 | 2.59 |
| Sample_T11A_bin.40 | 98.73  | 0.63 | 183 | 48.8 | Clostridiales      | 48.8 | 2.90 |
| Sample_T11A_bin.41 | 94.06  | 0.02 | 133 | 59.2 | Clostridiales      | 59.2 | 1.95 |
| Sample_T11A_bin.42 | 96.77  | 1.04 | 197 | 63.1 | Bifidobacteriaceae | 63.1 | 2.38 |
| Sample_T11A_bin.43 | 94.93  | 0.00 | 171 | 41.4 | Clostridiales      | 41.4 | 3.43 |
| Sample_T11A_bin.44 | 98.58  | 0.94 | 164 | 29.1 | Bacteria           | 29.1 | 2.98 |
| Sample_T11A_bin.47 | 98.65  | 0.00 | 45  | 53.1 | Clostridiales      | 53.1 | 2.60 |
| Sample_T11B_bin.2  | 98.65  | 1.34 | 88  | 36.9 | Clostridiales      | 36.9 | 2.77 |
| Sample_T11B_bin.4  | 98.94  | 0.63 | 157 | 47.5 | Clostridiales      | 47.5 | 3.35 |
| Sample_T11B_bin.5  | 90.22  | 3.38 | 98  | 60   | Bacteroidetes      | 60   | 2.64 |
| Sample_T11B_bin.6  | 97.31  | 1.34 | 108 | 38.1 | Clostridiales      | 38.1 | 2.48 |
| Sample_T11B_bin.8  | 99.32  | 0.00 | 39  | 34.5 | Clostridiales      | 34.5 | 2.34 |
| Sample_T11B_bin.9  | 96.23  | 0.00 | 162 | 43.2 | Bacteria           | 43.2 | 4.07 |
| Sample_T2C_bin.2   | 96.24  | 1.01 | 32  | 33.1 | Clostridiales      | 33.1 | 2.54 |
| Sample_T4B_bin.50  | 84.55  | 2.25 | 34  | 26.7 | Bacteria           | 26.7 | 1.22 |
| Sample_T4B_bin.52  | 88.25  | 2.35 | 74  | 59.4 | Clostridiales      | 59.4 | 2.08 |

|                    |       |      |     |      |                     |      |      |
|--------------------|-------|------|-----|------|---------------------|------|------|
| Sample_T2C_bin.6   | 99.51 | 1.22 | 71  | 41.1 | Lachnospiraceae     | 41.1 | 3.00 |
| Sample_T4B_bin.54  | 94.15 | 0.88 | 86  | 43   | Clostridia          | 43   | 1.35 |
| Sample_T2C_bin.5   | 97.31 | 1.01 | 73  | 52.9 | Clostridiales       | 52.9 | 2.05 |
| Sample_T2C_bin.8   | 96.59 | 0.68 | 246 | 56.3 | Clostridiales       | 56.3 | 2.41 |
| Sample_T2C_bin.9   | 97.98 | 0.00 | 59  | 32.2 | Clostridiales       | 32.2 | 2.72 |
| Sample_C9A_bin.6   | 84.56 | 4.70 | 23  | 52.1 | Clostridiales       | 52.1 | 2.27 |
| Sample_C9A_bin.7   | 98.94 | 0.63 | 58  | 48.1 | Clostridiales       | 48.1 | 2.93 |
| Sample_C9A_bin.4   | 85.85 | 0.45 | 76  | 43.5 | Bacteria            | 43.5 | 3.05 |
| Sample_C9A_bin.5   | 92.72 | 0.47 | 69  | 42.7 | Bacteroidales       | 42.7 | 6.20 |
| Sample_C9A_bin.3   | 98.26 | 0.38 | 124 | 44.9 | Bacteroidales       | 44.9 | 4.70 |
| Sample_C9A_bin.1   | 94.44 | 0.71 | 33  | 40.7 | Lachnospiraceae     | 40.7 | 2.59 |
| Sample_C9A_bin.8   | 97.14 | 2.63 | 91  | 41.5 | Bacteroidales       | 41.5 | 5.04 |
| Sample_C9A_bin.9   | 96.04 | 1.73 | 250 | 49   | Clostridiales       | 49   | 2.71 |
| Sample_C13A_bin.16 | 97.98 | 0.34 | 14  | 44.3 | Clostridiales       | 44.3 | 1.91 |
| Sample_C13A_bin.17 | 98.63 | 1.56 | 147 | 43.4 | Lachnospiraceae     | 43.4 | 2.83 |
| Sample_C13A_bin.15 | 98.72 | 0.64 | 37  | 38.3 | Clostridiales       | 38.3 | 2.81 |
| Sample_C13A_bin.12 | 98.87 | 1.69 | 300 | 28.4 | Bacteria            | 28.4 | 2.10 |
| Sample_C13A_bin.13 | 88.35 | 1.90 | 296 | 54.8 | Bacteroidetes       | 54.8 | 1.91 |
| Sample_C13A_bin.11 | 96.61 | 0.85 | 78  | 43   | Lachnospiraceae     | 43   | 3.30 |
| Sample_C13A_bin.18 | 93.93 | 0.16 | 219 | 26.9 | Clostridiales       | 26.9 | 2.79 |
| Sample_C13A_bin.19 | 98.10 | 0.63 | 45  | 31.3 | Firmicutes          | 31.3 | 2.44 |
| Sample_C3B_bin.13  | 97.76 | 0.67 | 87  | 44.1 | Clostridiales       | 44.1 | 2.78 |
| Sample_C3B_bin.11  | 98.62 | 0.96 | 87  | 54.8 | Bacteroidetes       | 54.8 | 2.09 |
| Sample_C3B_bin.17  | 94.20 | 3.86 | 90  | 41.6 | Lachnospiraceae     | 41.6 | 2.97 |
| Sample_C3B_bin.16  | 94.07 | 1.93 | 114 | 46.6 | Lachnospiraceae     | 46.6 | 2.87 |
| Sample_C3B_bin.14  | 88.38 | 2.31 | 440 | 46   | Bacteroidales       | 46   | 3.37 |
| Sample_C3B_bin.19  | 96.67 | 0.95 | 154 | 31.6 | Firmicutes          | 31.6 | 2.20 |
| Sample_C3B_bin.18  | 95.91 | 1.69 | 87  | 43.6 | Lachnospiraceae     | 43.6 | 2.66 |
| Sample_C10A_bin.13 | 83.05 | 2.68 | 155 | 62.1 | Clostridiales       | 62.1 | 1.84 |
| Sample_T13B_bin.21 | 98.64 | 0.00 | 140 | 52.1 | Firmicutes          | 52.1 | 2.59 |
| Sample_T13B_bin.20 | 99.47 | 1.57 | 112 | 32.6 | Lactobacillales     | 32.6 | 1.99 |
| Sample_T13B_bin.23 | 99.38 | 0.60 | 59  | 55.8 | Selenomonadales     | 55.8 | 2.39 |
| Sample_T13B_bin.22 | 96.21 | 4.26 | 45  | 40   | Streptococcus       | 40   | 1.99 |
| Sample_C3A_bin.8   | 85.99 | 0.39 | 657 | 60.3 | Deltaproteobacteria | 60.3 | 3.33 |
| Sample_C3A_bin.9   | 80.22 | 1.53 | 254 | 59.6 | Clostridiales       | 59.6 | 1.58 |
| Sample_C3A_bin.4   | 85.50 | 0.67 | 73  | 61.7 | Clostridiales       | 61.7 | 1.87 |
| Sample_C3A_bin.5   | 80.97 | 1.68 | 28  | 42.9 | Clostridiales       | 42.9 | 2.25 |
| Sample_C3A_bin.6   | 96.50 | 0.00 | 51  | 52.9 | Clostridia          | 52.9 | 2.02 |
| Sample_C3A_bin.7   | 91.08 | 0.96 | 299 | 45.6 | Bacteroidales       | 45.6 | 3.73 |

|                    |        |      |     |      |                    |      |      |
|--------------------|--------|------|-----|------|--------------------|------|------|
| Sample_C3A_bin.1   | 84.94  | 1.90 | 47  | 59.2 | Clostridiales      | 59.2 | 2.08 |
| Sample_C3A_bin.2   | 99.72  | 0.29 | 112 | 55.6 | Enterobacteriaceae | 55.6 | 4.63 |
| Sample_C3C_bin.45  | 85.00  | 0.89 | 157 | 45.2 | Lachnospiraceae    | 45.2 | 2.32 |
| Sample_C3C_bin.44  | 93.43  | 1.61 | 140 | 41.1 | Lachnospiraceae    | 41.1 | 2.39 |
| Sample_C1C_bin.2   | 97.58  | 0.74 | 63  | 40.9 | Lachnospiraceae    | 40.9 | 2.66 |
| Sample_C9C_bin.22  | 98.65  | 0.67 | 42  | 37.1 | Clostridiales      | 37.1 | 2.94 |
| Sample_T13B_bin.26 | 96.47  | 2.17 | 55  | 43.5 | Lachnospiraceae    | 43.5 | 2.88 |
| Sample_T3B_bin.16  | 89.56  | 1.67 | 535 | 45.6 | Bacteroidales      | 45.6 | 4.00 |
| Sample_T3B_bin.14  | 99.54  | 4.96 | 57  | 56.7 | Bifidobacteriaceae | 56.7 | 2.38 |
| Sample_T3B_bin.15  | 99.98  | 1.50 | 22  | 43.6 | Selenomonadales    | 43.6 | 2.39 |
| Sample_T3B_bin.12  | 91.59  | 1.73 | 323 | 42.8 | Lachnospiraceae    | 42.8 | 3.17 |
| Sample_T3B_bin.13  | 97.31  | 0.00 | 169 | 49.2 | Clostridiales      | 49.2 | 3.03 |
| Sample_T3B_bin.10  | 97.27  | 0.00 | 87  | 58.1 | Clostridiales      | 58.1 | 3.28 |
| Sample_T3B_bin.11  | 88.90  | 0.34 | 56  | 58.4 | Clostridiales      | 58.4 | 2.07 |
| Sample_T3B_bin.19  | 81.48  | 2.45 | 327 | 59.5 | Clostridiales      | 59.5 | 1.68 |
| Sample_T10B_bin.9  | 90.72  | 3.37 | 98  | 42.9 | Lachnospiraceae    | 42.9 | 3.16 |
| Sample_T10B_bin.8  | 82.48  | 0.68 | 68  | 60.1 | Clostridiales      | 60.1 | 1.78 |
| Sample_C11B_bin.50 | 93.28  | 4.87 | 170 | 59.4 | Clostridiales      | 59.4 | 2.24 |
| Sample_T5B_bin.8   | 89.71  | 0.00 | 112 | 40.6 | Clostridiales      | 40.6 | 2.24 |
| Sample_T5B_bin.9   | 99.05  | 0.11 | 235 | 48.5 | Proteobacteria     | 48.5 | 2.75 |
| Sample_T5B_bin.6   | 96.64  | 0.22 | 184 | 51.3 | Clostridiales      | 51.3 | 2.61 |
| Sample_T5B_bin.7   | 98.65  | 0.00 | 63  | 42   | Clostridiales      | 42   | 2.78 |
| Sample_T5B_bin.4   | 97.89  | 0.42 | 252 | 44.7 | Clostridiales      | 44.7 | 2.94 |
| Sample_T10B_bin.7  | 83.90  | 3.16 | 145 | 41.9 | Clostridiales      | 41.9 | 2.70 |
| Sample_T5B_bin.3   | 97.96  | 0.00 | 48  | 41.7 | Clostridiales      | 41.7 | 2.76 |
| Sample_T10B_bin.5  | 95.04  | 4.11 | 157 | 48.8 | Clostridiales      | 48.8 | 2.54 |
| Sample_T15B_bin.4  | 97.42  | 0.10 | 58  | 41.5 | Lachnospiraceae    | 41.5 | 2.67 |
| Sample_T15B_bin.6  | 97.58  | 1.70 | 171 | 59.8 | Actinobacteria     | 59.8 | 2.12 |
| Sample_C9B_bin.28  | 98.63  | 3.88 | 127 | 58   | Clostridiales      | 58   | 2.74 |
| Sample_T15B_bin.1  | 81.89  | 1.72 | 75  | 47.1 | Bacteria           | 47.1 | 2.52 |
| Sample_T15B_bin.2  | 97.51  | 0.62 | 205 | 62.9 | Proteobacteria     | 62.9 | 2.30 |
| Sample_C9B_bin.24  | 89.22  | 2.67 | 65  | 59.6 | Bacteroidetes      | 59.6 | 2.57 |
| Sample_T15B_bin.9  | 97.31  | 0.34 | 64  | 38.4 | Clostridiales      | 38.4 | 2.12 |
| Sample_C9B_bin.22  | 96.20  | 0.63 | 95  | 44   | Clostridiales      | 44   | 3.14 |
| Sample_C9B_bin.23  | 98.29  | 1.55 | 173 | 43.8 | Selenomonadales    | 43.8 | 2.26 |
| Sample_C2A_bin.59  | 97.98  | 4.36 | 72  | 58.7 | Clostridiales      | 58.7 | 2.15 |
| Sample_C1A_bin.49  | 100.00 | 0.23 | 26  | 56.2 | Bifidobacteriaceae | 56.2 | 2.23 |
| Sample_C1A_bin.47  | 87.78  | 0.78 | 40  | 41.7 | Lachnospiraceae    | 41.7 | 2.48 |
| Sample_C1A_bin.46  | 95.18  | 1.67 | 405 | 45.2 | Bacteroidales      | 45.2 | 4.43 |

|                    |        |      |     |      |                 |      |      |
|--------------------|--------|------|-----|------|-----------------|------|------|
| Sample_C1A_bin.44  | 93.28  | 1.34 | 61  | 36.3 | Clostridiales   | 36.3 | 2.41 |
| Sample_C2A_bin.57  | 97.20  | 0.93 | 111 | 58   | Clostridiales   | 58   | 2.94 |
| Sample_C1A_bin.42  | 98.63  | 0.82 | 22  | 58.7 | Clostridiales   | 58.7 | 3.24 |
| Sample_C2A_bin.55  | 91.22  | 2.56 | 59  | 42.9 | Lachnospiraceae | 42.9 | 2.32 |
| Sample_C1A_bin.40  | 92.90  | 0.71 | 125 | 28.9 | Bacteria        | 28.9 | 2.50 |
| Sample_T18C_bin.8  | 99.32  | 2.51 | 128 | 44.7 | Prevotella      | 44.7 | 4.14 |
| Sample_T18C_bin.9  | 95.89  | 2.42 | 82  | 41.9 | Lachnospiraceae | 41.9 | 2.55 |
| Sample_C13C_bin.24 | 89.98  | 0.62 | 72  | 38.9 | Clostridiales   | 38.9 | 2.02 |
| Sample_C13C_bin.26 | 93.93  | 0.89 | 173 | 61.2 | Clostridiales   | 61.2 | 1.97 |
| Sample_T8B_bin.8   | 92.29  | 3.24 | 97  | 45   | Lachnospiraceae | 45   | 2.55 |
| Sample_T2A_bin.18  | 96.46  | 2.09 | 279 | 48.4 | Bacteroidales   | 48.4 | 4.26 |
| Sample_C10A_bin.6  | 99.32  | 1.68 | 249 | 40.4 | Clostridiales   | 40.4 | 2.35 |
| Sample_C4C_bin.48  | 97.36  | 0.00 | 63  | 41   | Lachnospiraceae | 41   | 2.71 |
| Sample_C4C_bin.49  | 97.98  | 0.67 | 24  | 43.9 | Clostridiales   | 43.9 | 2.17 |
| Sample_T2A_bin.12  | 98.07  | 1.54 | 26  | 54.8 | Bacteroidetes   | 54.8 | 2.16 |
| Sample_T2A_bin.13  | 96.92  | 1.19 | 73  | 41.7 | Lachnospiraceae | 41.7 | 2.56 |
| Sample_T2A_bin.10  | 96.83  | 1.50 | 87  | 41.4 | Bacteroidales   | 41.4 | 5.27 |
| Sample_T2A_bin.11  | 97.14  | 0.00 | 84  | 36.9 | Clostridiales   | 36.9 | 2.81 |
| Sample_T2A_bin.16  | 95.66  | 1.32 | 371 | 43.5 | Bacteroidales   | 43.5 | 2.87 |
| Sample_T2A_bin.17  | 95.67  | 0.00 | 65  | 36.3 | Clostridiales   | 36.3 | 2.34 |
| Sample_T2A_bin.14  | 97.58  | 1.81 | 59  | 42.8 | Lachnospiraceae | 42.8 | 3.32 |
| Sample_C4C_bin.43  | 98.83  | 0.02 | 229 | 44.3 | Clostridiales   | 44.3 | 2.71 |
| Sample_C2B_bin.38  | 100.00 | 2.02 | 155 | 59.8 | Actinobacteria  | 59.8 | 2.10 |
| Sample_C2B_bin.39  | 96.93  | 0.34 | 68  | 51.5 | Clostridiales   | 51.5 | 2.12 |
| Sample_C2B_bin.31  | 97.04  | 0.00 | 23  | 52.4 | Clostridiales   | 52.4 | 2.36 |
| Sample_C2B_bin.34  | 93.15  | 0.00 | 66  | 44.9 | Lachnospiraceae | 44.9 | 2.53 |
| Sample_C2B_bin.35  | 97.83  | 0.96 | 23  | 54.3 | Bacteroidetes   | 54.3 | 2.12 |
| Sample_C2B_bin.36  | 92.13  | 1.12 | 26  | 25.7 | Bacteria        | 25.7 | 1.11 |
| Sample_C2B_bin.37  | 90.59  | 3.91 | 367 | 44.7 | Clostridiales   | 44.7 | 2.41 |
| Sample_T8B_bin.4   | 80.03  | 2.10 | 5   | 38.2 | Clostridiales   | 38.2 | 2.40 |
| Sample_T16C_bin.34 | 95.63  | 1.81 | 76  | 38.8 | Clostridiales   | 38.8 | 2.58 |
| Sample_T16C_bin.37 | 89.43  | 1.24 | 108 | 47.2 | Bacteroidales   | 47.2 | 3.74 |
| Sample_T16C_bin.30 | 98.65  | 0.00 | 49  | 36.4 | Clostridiales   | 36.4 | 2.41 |
| Sample_T16C_bin.31 | 98.43  | 1.34 | 122 | 40.7 | Clostridiales   | 40.7 | 2.74 |
| Sample_C12A_bin.28 | 100.00 | 0.00 | 19  | 31   | Euryarchaeota   | 31   | 1.75 |
| Sample_T16C_bin.33 | 92.33  | 1.21 | 180 | 42.2 | Lachnospiraceae | 42.2 | 2.53 |
| Sample_C12A_bin.26 | 94.77  | 0.00 | 40  | 36.1 | Clostridiales   | 36.1 | 2.57 |
| Sample_C12A_bin.27 | 95.07  | 1.34 | 117 | 46.2 | Clostridiales   | 46.2 | 2.35 |
| Sample_C12A_bin.24 | 83.49  | 1.60 | 192 | 55.1 | Bacteroidetes   | 55.1 | 1.76 |

|                    |        |      |     |      |                    |      |      |
|--------------------|--------|------|-----|------|--------------------|------|------|
| Sample_T8B_bin.6   | 82.91  | 0.95 | 329 | 41   | Clostridiales      | 41   | 3.05 |
| Sample_T16C_bin.38 | 93.82  | 0.00 | 40  | 26.6 | Bacteria           | 26.6 | 1.19 |
| Sample_C12A_bin.23 | 100.00 | 0.00 | 113 | 60   | Bifidobacteriaceae | 60   | 2.40 |
| Sample_C12A_bin.21 | 82.49  | 0.67 | 200 | 57.2 | Clostridiales      | 57.2 | 1.96 |
| Sample_T15A_bin.35 | 98.63  | 1.44 | 25  | 59.6 | Bacteroidetes      | 59.6 | 2.98 |
| Sample_T15A_bin.34 | 95.97  | 0.13 | 157 | 40.5 | Clostridiales      | 40.5 | 2.71 |
| Sample_T15A_bin.37 | 96.05  | 0.90 | 244 | 45.1 | Bacteroidales      | 45.1 | 4.30 |
| Sample_C6A_bin.10  | 98.99  | 1.07 | 82  | 41.2 | Clostridiales      | 41.2 | 1.89 |
| Sample_T4B_bin.18  | 82.71  | 0.79 | 43  | 53.5 | Rhodospirillales   | 53.5 | 2.43 |
| Sample_C3A_bin.16  | 98.65  | 0.34 | 69  | 38.5 | Clostridiales      | 38.5 | 2.26 |
| Sample_T8C_bin.31  | 98.65  | 0.00 | 187 | 44.3 | Clostridiales      | 44.3 | 2.62 |
| Sample_C3A_bin.14  | 93.66  | 0.27 | 64  | 58.9 | Clostridia         | 58.9 | 2.79 |
| Sample_C3A_bin.15  | 92.41  | 1.12 | 49  | 26.7 | Bacteria           | 26.7 | 1.29 |
| Sample_C3A_bin.12  | 85.50  | 0.40 | 51  | 58.6 | Clostridia         | 58.6 | 2.44 |
| Sample_C3A_bin.13  | 97.27  | 0.00 | 235 | 45   | Bacteroidales      | 45   | 4.64 |
| Sample_C3A_bin.10  | 92.97  | 2.93 | 102 | 51.2 | Clostridiales      | 51.2 | 2.21 |
| Sample_C3A_bin.11  | 98.38  | 1.08 | 342 | 53.6 | Clostridia         | 53.6 | 1.85 |
| Sample_C3B_bin.25  | 98.95  | 0.00 | 50  | 43.7 | Lactobacillales    | 43.7 | 2.15 |
| Sample_C3A_bin.18  | 94.24  | 2.55 | 56  | 60.5 | Clostridiales      | 60.5 | 2.15 |
| Sample_T7C_bin.25  | 98.47  | 3.66 | 115 | 44.6 | Prevotella         | 44.6 | 3.79 |
| Sample_C6A_bin.19  | 97.46  | 0.63 | 114 | 48.2 | Clostridiales      | 48.2 | 3.17 |
| Sample_C1A_bin.5   | 94.27  | 0.84 | 180 | 49.1 | Clostridiales      | 49.1 | 3.13 |
| Sample_T15A_bin.38 | 98.83  | 0.16 | 60  | 55.1 | Firmicutes         | 55.1 | 2.03 |
| Sample_C12A_bin.35 | 92.39  | 0.13 | 90  | 47   | Clostridiales      | 47   | 2.08 |
| Sample_T4B_bin.13  | 93.28  | 1.34 | 167 | 59.9 | Clostridiales      | 59.9 | 2.38 |
| Sample_C12A_bin.34 | 91.27  | 0.84 | 77  | 59.6 | Clostridiales      | 59.6 | 2.21 |
| Sample_C1A_bin.1   | 93.24  | 0.96 | 293 | 38.4 | Clostridiales      | 38.4 | 2.52 |
| Sample_C12A_bin.37 | 98.65  | 0.00 | 16  | 37.8 | Clostridiales      | 37.8 | 2.03 |
| Sample_C12A_bin.36 | 95.97  | 0.94 | 50  | 58.8 | Clostridiales      | 58.8 | 2.02 |
| Sample_T16A_bin.18 | 89.83  | 0.97 | 304 | 56.3 | Clostridiales      | 56.3 | 2.30 |
| Sample_T16A_bin.19 | 95.14  | 0.63 | 143 | 48.4 | Clostridiales      | 48.4 | 2.73 |
| Sample_C2C_bin.20  | 93.62  | 0.76 | 17  | 59.1 | Clostridiales      | 59.1 | 1.89 |
| Sample_T16A_bin.15 | 98.65  | 2.75 | 78  | 36.9 | Clostridiales      | 36.9 | 2.73 |
| Sample_T16A_bin.16 | 80.48  | 1.27 | 269 | 41.7 | Clostridiales      | 41.7 | 2.43 |
| Sample_T16A_bin.10 | 92.23  | 1.17 | 20  | 45.5 | Bacteroidales      | 45.5 | 3.90 |
| Sample_T16A_bin.11 | 91.77  | 0.00 | 48  | 36   | Clostridiales      | 36   | 2.51 |
| Sample_T16A_bin.12 | 99.03  | 0.85 | 88  | 42.7 | Lachnospiraceae    | 42.7 | 3.44 |
| Sample_C2C_bin.27  | 97.82  | 1.69 | 40  | 43.6 | Lachnospiraceae    | 43.6 | 2.76 |
| Sample_T14A_bin.26 | 88.39  | 2.22 | 281 | 48.7 | Clostridiales      | 48.7 | 2.48 |

|                    |        |      |     |      |                    |      |      |
|--------------------|--------|------|-----|------|--------------------|------|------|
| Sample_T14A_bin.25 | 93.47  | 1.11 | 190 | 38.3 | Clostridiales      | 38.3 | 2.63 |
| Sample_T14A_bin.22 | 99.32  | 0.31 | 51  | 42.5 | Clostridiales      | 42.5 | 3.07 |
| Sample_T14A_bin.20 | 100.00 | 1.27 | 20  | 31.3 | Firmicutes         | 31.3 | 2.55 |
| Sample_T3C_bin.33  | 80.57  | 0.00 | 359 | 35.8 | Clostridiales      | 35.8 | 2.28 |
| Sample_T3C_bin.30  | 98.73  | 0.89 | 21  | 49.2 | Clostridiales      | 49.2 | 2.90 |
| Sample_T3C_bin.37  | 98.65  | 0.00 | 23  | 43.7 | Clostridiales      | 43.7 | 3.04 |
| Sample_T14A_bin.29 | 84.26  | 1.12 | 139 | 26.2 | Bacteria           | 26.2 | 1.04 |
| Sample_T3C_bin.34  | 87.42  | 1.90 | 50  | 49.5 | Clostridiales      | 49.5 | 2.19 |
| Sample_C7C_bin.1   | 90.98  | 2.72 | 180 | 59.2 | Clostridiales      | 59.2 | 1.97 |
| Sample_C7C_bin.6   | 98.73  | 0.02 | 113 | 48.5 | Firmicutes         | 48.5 | 2.17 |
| Sample_C7C_bin.7   | 98.75  | 0.63 | 34  | 54.3 | Proteobacteria     | 54.3 | 2.33 |
| Sample_C7C_bin.5   | 87.06  | 0.51 | 80  | 59.8 | Clostridiales      | 59.8 | 1.92 |
| Sample_C7C_bin.8   | 81.82  | 0.95 | 404 | 44.1 | Clostridiales      | 44.1 | 2.83 |
| Sample_C10B_bin.19 | 98.32  | 0.00 | 137 | 37.2 | Clostridiales      | 37.2 | 2.42 |
| Sample_T10B_bin.34 | 83.41  | 0.67 | 353 | 44.9 | Clostridiales      | 44.9 | 2.12 |
| Sample_T6B_bin.30  | 99.94  | 0.11 | 92  | 49.2 | Proteobacteria     | 49.2 | 2.36 |
| Sample_T4B_bin.42  | 93.54  | 0.81 | 474 | 52.6 | Clostridia         | 52.6 | 2.24 |
| Sample_T4B_bin.43  | 94.72  | 1.89 | 73  | 51.2 | Enterobacteriaceae | 51.2 | 4.08 |
| Sample_T4B_bin.40  | 100.00 | 0.00 | 47  | 31.3 | Euryarchaeota      | 31.3 | 1.70 |
| Sample_T4B_bin.41  | 97.04  | 0.00 | 52  | 52.6 | Clostridiales      | 52.6 | 2.34 |
| Sample_T4B_bin.46  | 98.10  | 0.34 | 109 | 48.4 | Firmicutes         | 48.4 | 2.11 |
| Sample_T4B_bin.47  | 88.25  | 0.67 | 195 | 53.8 | Clostridiales      | 53.8 | 1.87 |
| Sample_T4B_bin.44  | 99.32  | 1.68 | 49  | 39.9 | Clostridiales      | 39.9 | 2.56 |
| Sample_T4B_bin.45  | 84.65  | 2.64 | 31  | 26.3 | Bacteria           | 26.3 | 1.08 |
| Sample_T4B_bin.48  | 98.65  | 0.74 | 59  | 58.6 | Clostridiales      | 58.6 | 2.13 |
| Sample_C11B_bin.41 | 97.73  | 0.37 | 211 | 49.7 | Bacteroidales      | 49.7 | 2.67 |
| Sample_T6B_bin.10  | 99.42  | 0.38 | 44  | 45.1 | Bacteroidales      | 45.1 | 4.55 |
| Sample_T3C_bin.35  | 96.66  | 0.00 | 24  | 37.3 | Clostridiales      | 37.3 | 2.70 |
| Sample_T13B_bin.3  | 86.87  | 2.35 | 229 | 59.7 | Bacteroidetes      | 59.7 | 2.46 |
| Sample_T8A_bin.18  | 89.26  | 3.13 | 133 | 60.5 | Clostridiales      | 60.5 | 1.88 |
| Sample_T8A_bin.19  | 87.40  | 0.77 | 317 | 48.7 | Lachnospiraceae    | 48.7 | 2.78 |
| Sample_C12B_bin.8  | 98.83  | 1.17 | 152 | 57.8 | Clostridiales      | 57.8 | 3.11 |
| Sample_C12B_bin.9  | 97.30  | 0.90 | 55  | 46.8 | Selenomonadales    | 46.8 | 2.29 |
| Sample_T8A_bin.10  | 98.38  | 0.81 | 139 | 60   | Actinobacteria     | 60   | 2.19 |
| Sample_C12B_bin.5  | 98.63  | 0.00 | 63  | 42.7 | Clostridiales      | 42.7 | 3.01 |
| Sample_C12B_bin.6  | 95.05  | 2.42 | 199 | 47.3 | Lachnospiraceae    | 47.3 | 2.98 |
| Sample_C6A_bin.43  | 97.31  | 0.00 | 76  | 47   | Clostridiales      | 47   | 2.66 |
| Sample_T8A_bin.14  | 95.89  | 0.00 | 49  | 41.6 | Lachnospiraceae    | 41.6 | 2.66 |
| Sample_T8A_bin.15  | 96.64  | 0.02 | 142 | 37.6 | Clostridiales      | 37.6 | 2.56 |

|                   |       |      |     |      |                    |      |      |
|-------------------|-------|------|-----|------|--------------------|------|------|
| Sample_T8A_bin.16 | 93.12 | 2.20 | 158 | 41.8 | Bacteroidales      | 41.8 | 3.68 |
| Sample_T8A_bin.17 | 98.30 | 0.00 | 58  | 50   | Bacteroidales      | 50   | 2.46 |
| Sample_T13B_bin.2 | 99.32 | 2.01 | 38  | 37   | Clostridiales      | 37   | 2.64 |
| Sample_T6C_bin.15 | 99.51 | 3.64 | 24  | 41   | Lachnospiraceae    | 41   | 2.66 |
| Sample_T13B_bin.1 | 99.32 | 2.20 | 9   | 40.5 | Clostridiales      | 40.5 | 2.30 |
| Sample_T6C_bin.10 | 93.93 | 2.01 | 41  | 49.5 | Clostridiales      | 49.5 | 2.10 |
| Sample_T13B_bin.7 | 95.78 | 1.55 | 320 | 56.5 | Clostridiales      | 56.5 | 2.45 |
| Sample_T6C_bin.12 | 99.51 | 0.48 | 243 | 41.6 | Lachnospiraceae    | 41.6 | 2.74 |
| Sample_T6C_bin.13 | 93.65 | 2.06 | 40  | 56.3 | Clostridiales      | 56.3 | 2.39 |
| Sample_T13B_bin.8 | 98.95 | 0.96 | 103 | 58.7 | Bacteroidetes      | 58.7 | 2.53 |
| Sample_T13B_bin.9 | 98.63 | 0.68 | 35  | 43   | Clostridiales      | 43   | 2.76 |
| Sample_T6C_bin.18 | 90.35 | 3.46 | 64  | 46.6 | Bacteroidales      | 46.6 | 4.05 |
| Sample_C3B_bin.5  | 90.96 | 0.62 | 377 | 45   | Clostridiales      | 45   | 2.26 |
| Sample_C3B_bin.3  | 98.73 | 1.48 | 47  | 48.2 | Clostridiales      | 48.2 | 2.95 |
| Sample_C3B_bin.9  | 92.41 | 2.52 | 139 | 37.5 | Clostridiales      | 37.5 | 2.39 |
| Sample_C9B_bin.9  | 99.23 | 0.00 | 64  | 45   | Bacteroidales      | 45   | 4.02 |
| Sample_C9B_bin.8  | 99.96 | 0.43 | 130 | 50.5 | Enterobacteriaceae | 50.5 | 4.90 |
| Sample_C9B_bin.5  | 95.89 | 2.96 | 134 | 44.5 | Bacteroidales      | 44.5 | 4.18 |
| Sample_C9B_bin.4  | 97.98 | 0.13 | 24  | 35.9 | Clostridiales      | 35.9 | 2.58 |
| Sample_C9B_bin.7  | 98.55 | 3.06 | 53  | 46.7 | Lachnospiraceae    | 46.7 | 3.45 |
| Sample_C9B_bin.1  | 97.76 | 3.37 | 53  | 42.7 | Bacteroidales      | 42.7 | 6.68 |
| Sample_C9B_bin.3  | 98.94 | 0.63 | 174 | 48.1 | Clostridiales      | 48.1 | 3.19 |
| Sample_T6B_bin.15 | 93.56 | 0.58 | 54  | 41.9 | Lachnospiraceae    | 41.9 | 2.29 |
| Sample_C5A_bin.28 | 92.61 | 1.54 | 54  | 62.5 | Clostridiales      | 62.5 | 1.90 |
| Sample_C5A_bin.23 | 94.14 | 1.13 | 287 | 41   | Clostridiales      | 41   | 3.45 |
| Sample_T1C_bin.9  | 99.05 | 0.47 | 121 | 33.6 | Bacteria           | 33.6 | 2.28 |
| Sample_C5A_bin.25 | 97.27 | 0.68 | 224 | 56.3 | Clostridiales      | 56.3 | 2.40 |
| Sample_C5A_bin.24 | 80.59 | 2.35 | 79  | 59.2 | Clostridiales      | 59.2 | 2.08 |
| Sample_C5A_bin.27 | 98.65 | 0.00 | 26  | 37.6 | Clostridiales      | 37.6 | 2.19 |
| Sample_C3A_bin.28 | 81.46 | 3.52 | 283 | 62   | Clostridiales      | 62   | 1.76 |
| Sample_T3B_bin.29 | 84.33 | 0.67 | 465 | 60.6 | Clostridiales      | 60.6 | 2.65 |
| Sample_T3B_bin.28 | 98.65 | 0.00 | 23  | 38   | Clostridiales      | 38   | 1.96 |
| Sample_C8A_bin.9  | 90.32 | 2.61 | 101 | 59.8 | Clostridiales      | 59.8 | 1.86 |
| Sample_C8A_bin.8  | 98.30 | 0.48 | 50  | 41.7 | Lachnospiraceae    | 41.7 | 2.56 |
| Sample_T3B_bin.23 | 91.45 | 1.51 | 66  | 61.4 | Clostridiales      | 61.4 | 2.02 |
| Sample_T3B_bin.22 | 98.94 | 1.79 | 73  | 47.9 | Clostridiales      | 47.9 | 3.06 |
| Sample_T3B_bin.21 | 99.32 | 1.34 | 109 | 40.7 | Clostridiales      | 40.7 | 2.12 |
| Sample_T3B_bin.20 | 92.48 | 2.71 | 41  | 37.3 | Clostridiales      | 37.3 | 2.28 |
| Sample_T3B_bin.27 | 99.27 | 0.00 | 63  | 55   | Bacteroidetes      | 55   | 2.68 |

|                    |        |      |     |      |                 |      |      |
|--------------------|--------|------|-----|------|-----------------|------|------|
| Sample_T3B_bin.26  | 89.57  | 1.44 | 222 | 55.8 | Bacteroidetes   | 55.8 | 1.74 |
| Sample_T3B_bin.25  | 100.00 | 2.85 | 221 | 31.2 | Firmicutes      | 31.2 | 2.61 |
| Sample_C8A_bin.2   | 88.60  | 4.12 | 60  | 57.8 | Clostridiales   | 57.8 | 2.28 |
| Sample_T12A_bin.6  | 97.31  | 1.34 | 104 | 37.5 | Clostridiales   | 37.5 | 2.06 |
| Sample_T12A_bin.7  | 94.92  | 2.28 | 227 | 44.1 | Lachnospiraceae | 44.1 | 2.90 |
| Sample_T12A_bin.5  | 97.31  | 0.67 | 38  | 54.1 | Clostridiales   | 54.1 | 2.02 |
| Sample_T12A_bin.2  | 96.29  | 0.63 | 279 | 55.6 | Proteobacteria  | 55.6 | 2.20 |
| Sample_T12A_bin.3  | 80.61  | 1.87 | 219 | 44.1 | Clostridiales   | 44.1 | 2.39 |
| Sample_T12A_bin.1  | 97.98  | 0.34 | 53  | 38.7 | Clostridiales   | 38.7 | 2.01 |
| Sample_T13B_bin.4  | 99.15  | 0.19 | 35  | 37.5 | Lactobacillales | 37.5 | 2.77 |
| Sample_T12A_bin.8  | 94.14  | 0.91 | 307 | 59.3 | Clostridiales   | 59.3 | 2.87 |
| Sample_T12A_bin.9  | 93.95  | 0.84 | 215 | 39.9 | Clostridiales   | 39.9 | 2.13 |
| Sample_C4B_bin.49  | 97.90  | 1.17 | 83  | 58.1 | Clostridiales   | 58.1 | 3.04 |
| Sample_C4B_bin.43  | 89.93  | 0.00 | 301 | 36.3 | Clostridiales   | 36.3 | 2.40 |
| Sample_C4B_bin.42  | 98.73  | 0.02 | 31  | 48.3 | Firmicutes      | 48.3 | 2.17 |
| Sample_C4B_bin.47  | 82.60  | 0.06 | 368 | 52.4 | Clostridiales   | 52.4 | 2.08 |
| Sample_C4B_bin.46  | 98.94  | 1.48 | 106 | 47.9 | Clostridiales   | 47.9 | 3.17 |
| Sample_C4B_bin.44  | 91.95  | 0.71 | 456 | 43.4 | Clostridiales   | 43.4 | 2.27 |
| Sample_C11C_bin.18 | 91.04  | 2.18 | 110 | 42.2 | Bacteroides     | 42.2 | 4.73 |
| Sample_C11C_bin.19 | 97.66  | 0.05 | 85  | 41.7 | Lachnospiraceae | 41.7 | 2.51 |
| Sample_C2A_bin.48  | 88.96  | 0.40 | 145 | 60.2 | Clostridia      | 60.2 | 2.26 |
| Sample_C2A_bin.44  | 98.43  | 0.47 | 57  | 56.9 | Clostridiales   | 56.9 | 2.45 |
| Sample_C11C_bin.13 | 99.32  | 1.01 | 301 | 40.7 | Clostridiales   | 40.7 | 2.14 |
| Sample_C2A_bin.46  | 80.80  | 0.89 | 148 | 62   | Clostridiales   | 62   | 1.81 |
| Sample_C2A_bin.47  | 89.92  | 3.04 | 480 | 43.4 | Bacteroidales   | 43.4 | 2.70 |
| Sample_C2A_bin.40  | 93.25  | 3.93 | 50  | 25.5 | Bacteria        | 25.5 | 1.35 |
| Sample_C11C_bin.17 | 89.74  | 0.85 | 11  | 32.1 | Bacteria        | 32.1 | 1.85 |
| Sample_C2A_bin.42  | 96.64  | 2.01 | 237 | 34   | Clostridiales   | 34   | 2.51 |
| Sample_C2A_bin.43  | 90.76  | 2.72 | 77  | 60.1 | Clostridiales   | 60.1 | 1.88 |
| Sample_C1A_bin.51  | 85.81  | 0.00 | 368 | 42   | Clostridiales   | 42   | 2.67 |
| Sample_C1A_bin.52  | 84.26  | 3.90 | 25  | 49.6 | Clostridiales   | 49.6 | 2.18 |
| Sample_C1A_bin.53  | 98.65  | 0.00 | 36  | 37.7 | Clostridiales   | 37.7 | 2.15 |
| Sample_C1A_bin.54  | 99.32  | 0.34 | 234 | 36.5 | Clostridiales   | 36.5 | 2.12 |
| Sample_T11B_bin.27 | 96.97  | 1.34 | 18  | 33.8 | Clostridiales   | 33.8 | 2.27 |
| Sample_T14B_bin.10 | 91.23  | 2.43 | 110 | 46.5 | Bacteroidales   | 46.5 | 3.10 |
| Sample_C8B_bin.36  | 95.19  | 1.34 | 129 | 33.2 | Clostridiales   | 33.2 | 2.16 |
| Sample_C10C_bin.14 | 98.12  | 0.10 | 260 | 57.4 | Proteobacteria  | 57.4 | 2.40 |
| Sample_C10C_bin.13 | 97.31  | 0.06 | 112 | 53.9 | Clostridiales   | 53.9 | 1.84 |
| Sample_C10C_bin.11 | 97.98  | 1.48 | 9   | 33.1 | Clostridiales   | 33.1 | 2.18 |



|                    |        |      |     |      |                    |      |      |
|--------------------|--------|------|-----|------|--------------------|------|------|
| Sample_T2A_bin.29  | 94.30  | 2.27 | 191 | 44.2 | Clostridiales      | 44.2 | 3.02 |
| Sample_T2A_bin.28  | 97.31  | 0.67 | 10  | 53.2 | Clostridiales      | 53.2 | 1.94 |
| Sample_T2A_bin.27  | 99.25  | 3.07 | 88  | 44.8 | Bacteroidales      | 44.8 | 3.81 |
| Sample_T2A_bin.26  | 98.99  | 0.00 | 54  | 45.2 | Clostridiales      | 45.2 | 2.75 |
| Sample_T2A_bin.24  | 96.71  | 0.00 | 361 | 33.1 | Clostridiales      | 33.1 | 2.60 |
| Sample_T2A_bin.23  | 94.53  | 1.22 | 140 | 43.1 | Lachnospiraceae    | 43.1 | 2.19 |
| Sample_T2A_bin.22  | 89.39  | 1.27 | 147 | 49   | Clostridiales      | 49   | 2.45 |
| Sample_T2A_bin.21  | 99.77  | 0.00 | 245 | 43.6 | Clostridiales      | 43.6 | 3.04 |
| Sample_T2A_bin.20  | 99.51  | 1.22 | 56  | 40.9 | Lachnospiraceae    | 40.9 | 2.67 |
| Sample_T12B_bin.15 | 96.26  | 0.53 | 42  | 46   | Bacteroidales      | 46   | 3.18 |
| Sample_C2B_bin.48  | 96.83  | 0.65 | 99  | 48.7 | Firmicutes         | 48.7 | 2.14 |
| Sample_T12B_bin.14 | 98.41  | 3.29 | 122 | 44.2 | Clostridiales      | 44.2 | 3.13 |
| Sample_C2B_bin.45  | 92.17  | 0.67 | 19  | 45.2 | Clostridiales      | 45.2 | 1.71 |
| Sample_C2B_bin.47  | 95.97  | 1.01 | 46  | 40.7 | Clostridiales      | 40.7 | 2.09 |
| Sample_C2B_bin.41  | 96.32  | 0.00 | 74  | 37.5 | Clostridiales      | 37.5 | 2.57 |
| Sample_T16A_bin.8  | 99.25  | 0.19 | 113 | 37.6 | Lactobacillales    | 37.6 | 2.75 |
| Sample_C2B_bin.43  | 98.18  | 0.00 | 52  | 41.8 | Clostridiales      | 41.8 | 3.00 |
| Sample_T12B_bin.5  | 90.25  | 1.40 | 380 | 42.3 | Clostridiales      | 42.3 | 2.37 |
| Sample_T12B_bin.16 | 83.53  | 1.40 | 183 | 45.6 | Prevotella         | 45.6 | 2.05 |
| Sample_C13C_bin.25 | 94.92  | 1.45 | 81  | 41.8 | Lachnospiraceae    | 41.8 | 3.05 |
| Sample_C6C_bin.4   | 91.04  | 0.93 | 35  | 44.5 | Bacteroidales      | 44.5 | 3.05 |
| Sample_C6C_bin.7   | 97.90  | 0.04 | 91  | 56.5 | Clostridiales      | 56.5 | 2.34 |
| Sample_C6C_bin.6   | 96.93  | 1.44 | 90  | 59.8 | Bacteroidetes      | 59.8 | 2.59 |
| Sample_C13C_bin.21 | 97.98  | 1.76 | 62  | 59.4 | Clostridiales      | 59.4 | 2.28 |
| Sample_C13C_bin.20 | 94.32  | 1.72 | 144 | 41.6 | Lachnospiraceae    | 41.6 | 3.36 |
| Sample_C13C_bin.23 | 97.04  | 0.00 | 276 | 49   | Clostridiales      | 49   | 2.72 |
| Sample_C6C_bin.2   | 97.31  | 0.00 | 27  | 54   | Clostridiales      | 54   | 1.83 |
| Sample_T16C_bin.29 | 93.03  | 0.63 | 58  | 44.7 | Clostridiales      | 44.7 | 2.55 |
| Sample_T16C_bin.28 | 97.31  | 1.74 | 117 | 38.2 | Clostridiales      | 38.2 | 2.56 |
| Sample_C12A_bin.39 | 98.38  | 0.81 | 19  | 59.8 | Actinobacteria     | 59.8 | 2.21 |
| Sample_T12B_bin.3  | 98.65  | 0.08 | 46  | 43.8 | Clostridiales      | 43.8 | 2.81 |
| Sample_T16C_bin.23 | 100.00 | 0.00 | 142 | 60.4 | Bifidobacteriaceae | 60.4 | 1.91 |
| Sample_T16C_bin.22 | 99.51  | 0.06 | 20  | 41.5 | Lachnospiraceae    | 41.5 | 2.83 |
| Sample_T16C_bin.21 | 98.65  | 0.67 | 40  | 33.1 | Clostridiales      | 33.1 | 2.53 |
| Sample_T1C_bin.1   | 92.67  | 4.59 | 110 | 44.1 | Clostridiales      | 44.1 | 3.27 |
| Sample_T16C_bin.27 | 91.07  | 0.59 | 59  | 46.4 | Bacteroidales      | 46.4 | 3.48 |
| Sample_T16C_bin.26 | 84.05  | 1.13 | 103 | 59.8 | Clostridiales      | 59.8 | 2.01 |
| Sample_T16C_bin.25 | 89.45  | 0.94 | 174 | 49.3 | Clostridiales      | 49.3 | 2.28 |
| Sample_T16C_bin.24 | 99.32  | 0.34 | 160 | 38.9 | Clostridiales      | 38.9 | 2.19 |

|                    |        |      |     |      |                 |      |      |
|--------------------|--------|------|-----|------|-----------------|------|------|
| Sample_T16A_bin.1  | 96.15  | 2.87 | 590 | 46.3 | Bacteroidales   | 46.3 | 3.94 |
| Sample_T16A_bin.6  | 99.36  | 0.63 | 47  | 44   | Clostridiales   | 44   | 3.48 |
| Sample_T6C_bin.6   | 97.27  | 0.06 | 44  | 51.3 | Clostridiales   | 51.3 | 2.17 |
| Sample_T6C_bin.7   | 80.68  | 1.92 | 621 | 57.6 | Bacteroidetes   | 57.6 | 2.99 |
| Sample_T6C_bin.4   | 96.38  | 1.15 | 169 | 45.3 | Bacteroidales   | 45.3 | 4.27 |
| Sample_T6C_bin.5   | 98.65  | 0.00 | 35  | 41.7 | Clostridiales   | 41.7 | 2.77 |
| Sample_T6C_bin.2   | 93.03  | 1.64 | 83  | 41.3 | Clostridiales   | 41.3 | 2.81 |
| Sample_T6C_bin.3   | 86.78  | 0.97 | 510 | 47.5 | Lachnospiraceae | 47.5 | 2.44 |
| Sample_T6C_bin.1   | 90.60  | 0.00 | 33  | 60.3 | Clostridiales   | 60.3 | 1.90 |
| Sample_C3A_bin.23  | 92.48  | 1.83 | 40  | 41.8 | Bacteroides     | 41.8 | 4.48 |
| Sample_C3A_bin.22  | 83.26  | 1.34 | 76  | 58.6 | Clostridiales   | 58.6 | 1.53 |
| Sample_C3A_bin.20  | 96.23  | 0.00 | 64  | 43.4 | Bacteria        | 43.4 | 3.79 |
| Sample_C3A_bin.26  | 94.51  | 1.26 | 252 | 48.3 | Proteobacteria  | 48.3 | 2.65 |
| Sample_C3A_bin.25  | 89.20  | 2.01 | 211 | 59.4 | Clostridiales   | 59.4 | 2.08 |
| Sample_C3A_bin.24  | 81.87  | 1.52 | 71  | 41   | Lachnospiraceae | 41   | 1.95 |
| Sample_T17A_bin.15 | 99.32  | 4.03 | 68  | 44.7 | Clostridiales   | 44.7 | 3.04 |
| Sample_T17A_bin.14 | 99.98  | 1.50 | 131 | 43.7 | Selenomonadales | 43.7 | 2.42 |
| Sample_T17A_bin.11 | 97.12  | 0.63 | 44  | 44.1 | Clostridiales   | 44.1 | 3.51 |
| Sample_T17A_bin.13 | 97.71  | 0.16 | 25  | 38.6 | Clostridiales   | 38.6 | 2.46 |
| Sample_T1C_bin.7   | 100.00 | 0.63 | 95  | 31.3 | Firmicutes      | 31.3 | 2.37 |
| Sample_C12C_bin.52 | 92.61  | 0.00 | 23  | 42.2 | Clostridiales   | 42.2 | 1.75 |
| Sample_T17A_bin.19 | 95.80  | 0.84 | 37  | 46.9 | Clostridiales   | 46.9 | 3.06 |
| Sample_T17A_bin.18 | 97.02  | 0.70 | 49  | 40.7 | Bacteroidales   | 40.7 | 3.61 |
| Sample_C8C_bin.51  | 95.00  | 0.00 | 54  | 43.6 | Proteobacteria  | 43.6 | 2.28 |
| Sample_C8C_bin.50  | 87.85  | 0.27 | 266 | 60.4 | Bacteroidetes   | 60.4 | 2.36 |
| Sample_T8B_bin.38  | 80.78  | 1.02 | 427 | 55.8 | Bacteria        | 55.8 | 2.21 |
| Sample_T8B_bin.36  | 99.40  | 0.80 | 39  | 46.7 | Selenomonadales | 46.7 | 2.37 |
| Sample_T8B_bin.35  | 95.86  | 0.67 | 157 | 38.1 | Clostridiales   | 38.1 | 1.80 |
| Sample_T8B_bin.34  | 95.43  | 2.79 | 64  | 45.2 | Bacteroidales   | 45.2 | 3.76 |
| Sample_T8B_bin.32  | 81.99  | 2.48 | 383 | 40.1 | Lachnospiraceae | 40.1 | 2.21 |
| Sample_T8B_bin.31  | 96.36  | 0.77 | 58  | 48.5 | Lachnospiraceae | 48.5 | 2.89 |
| Sample_T8B_bin.30  | 91.82  | 0.96 | 27  | 54.9 | Bacteroidetes   | 54.9 | 1.96 |
| Sample_C4B_bin.8   | 97.72  | 0.89 | 84  | 32.7 | Clostridiales   | 32.7 | 2.06 |
| Sample_C4B_bin.9   | 90.82  | 1.38 | 256 | 49.5 | Clostridiales   | 49.5 | 2.40 |
| Sample_C4B_bin.2   | 98.65  | 0.00 | 68  | 44.2 | Clostridiales   | 44.2 | 2.84 |
| Sample_C4B_bin.1   | 96.15  | 3.37 | 435 | 55   | Bacteroidetes   | 55   | 2.09 |
| Sample_C4B_bin.6   | 99.36  | 0.00 | 97  | 44.4 | Clostridiales   | 44.4 | 2.84 |
| Sample_C4B_bin.7   | 98.65  | 0.00 | 21  | 36.4 | Clostridiales   | 36.4 | 1.87 |
| Sample_C4B_bin.4   | 85.78  | 2.01 | 102 | 52.5 | Clostridiales   | 52.5 | 2.70 |

|                    |        |      |     |      |                     |      |      |
|--------------------|--------|------|-----|------|---------------------|------|------|
| Sample_T3C_bin.28  | 84.48  | 1.72 | 80  | 40.7 | Bacteria            | 40.7 | 3.25 |
| Sample_T3C_bin.29  | 98.06  | 2.42 | 115 | 46.5 | Lachnospiraceae     | 46.5 | 3.63 |
| Sample_T14C_bin.8  | 94.05  | 0.00 | 177 | 42   | Clostridiales       | 42   | 2.61 |
| Sample_T14C_bin.9  | 98.75  | 0.63 | 31  | 55.8 | Proteobacteria      | 55.8 | 2.11 |
| Sample_T14C_bin.6  | 95.48  | 1.18 | 162 | 56.7 | Bifidobacteriaceae  | 56.7 | 1.87 |
| Sample_T14C_bin.7  | 96.78  | 0.68 | 213 | 45.7 | Bacteroidales       | 45.7 | 3.75 |
| Sample_T14C_bin.4  | 99.30  | 1.17 | 98  | 57.6 | Clostridiales       | 57.6 | 3.17 |
| Sample_T14C_bin.5  | 99.32  | 0.57 | 32  | 42.6 | Clostridiales       | 42.6 | 3.09 |
| Sample_T14C_bin.2  | 99.03  | 2.42 | 193 | 46.3 | Lachnospiraceae     | 46.3 | 3.12 |
| Sample_T14C_bin.1  | 97.98  | 0.00 | 96  | 36.5 | Clostridiales       | 36.5 | 1.93 |
| Sample_T10A_bin.12 | 95.99  | 3.48 | 83  | 45.5 | Firmicutes          | 45.5 | 1.67 |
| Sample_T10A_bin.13 | 97.58  | 0.81 | 36  | 63   | Actinobacteria      | 63   | 2.68 |
| Sample_T10A_bin.10 | 99.51  | 1.22 | 156 | 40.7 | Lachnospiraceae     | 40.7 | 2.82 |
| Sample_T10A_bin.16 | 96.63  | 1.28 | 108 | 55.2 | Bacteroidetes       | 55.2 | 2.00 |
| Sample_T10A_bin.17 | 96.31  | 0.75 | 94  | 42   | Bacteroidales       | 42   | 4.72 |
| Sample_T10A_bin.14 | 86.58  | 0.00 | 94  | 59.4 | Bacteroidetes       | 59.4 | 2.43 |
| Sample_T10A_bin.15 | 93.93  | 1.34 | 45  | 49.5 | Clostridiales       | 49.5 | 1.99 |
| Sample_T10A_bin.19 | 94.29  | 0.67 | 17  | 58.2 | Clostridiales       | 58.2 | 1.84 |
| Sample_C8B_bin.6   | 98.10  | 0.02 | 95  | 48.5 | Firmicutes          | 48.5 | 2.07 |
| Sample_C8B_bin.7   | 97.65  | 0.00 | 57  | 37.4 | Clostridiales       | 37.4 | 2.63 |
| Sample_C8B_bin.4   | 98.38  | 0.89 | 219 | 41.9 | Lachnospiraceae     | 41.9 | 2.53 |
| Sample_C13B_bin.30 | 84.05  | 2.82 | 96  | 37.4 | Clostridiales       | 37.4 | 3.91 |
| Sample_C8B_bin.3   | 96.20  | 2.29 | 32  | 44.2 | Clostridiales       | 44.2 | 3.24 |
| Sample_C8B_bin.9   | 97.39  | 0.37 | 89  | 48.2 | Bacteroidales       | 48.2 | 3.70 |
| Sample_T13B_bin.50 | 93.66  | 0.84 | 521 | 33.3 | Bacteria            | 33.3 | 2.21 |
| Sample_T13B_bin.51 | 87.88  | 4.15 | 126 | 40.5 | Bacteroidales       | 40.5 | 3.35 |
| Sample_T13B_bin.52 | 84.27  | 0.35 | 612 | 28.7 | Clostridiales       | 28.7 | 2.28 |
| Sample_T13B_bin.53 | 80.12  | 0.03 | 38  | 60.5 | Deltaproteobacteria | 60.5 | 2.83 |
| Sample_T13B_bin.54 | 97.98  | 0.34 | 140 | 44.2 | Clostridiales       | 44.2 | 2.07 |
| Sample_T13B_bin.55 | 83.27  | 0.48 | 289 | 48.4 | Lachnospiraceae     | 48.4 | 2.38 |
| Sample_T13B_bin.56 | 98.51  | 0.42 | 69  | 45.3 | Bacteroidales       | 45.3 | 3.70 |
| Sample_T13B_bin.58 | 100.00 | 0.56 | 18  | 60.4 | Bifidobacteriaceae  | 60.4 | 1.91 |
| Sample_T13C_bin.20 | 97.05  | 0.68 | 330 | 56.4 | Clostridiales       | 56.4 | 2.43 |
| Sample_T13C_bin.21 | 89.37  | 2.35 | 40  | 37.6 | Clostridiales       | 37.6 | 2.55 |
| Sample_T13C_bin.26 | 97.44  | 0.09 | 92  | 60.4 | Bifidobacteriaceae  | 60.4 | 1.90 |
| Sample_T13C_bin.27 | 99.51  | 0.48 | 39  | 41.5 | Lachnospiraceae     | 41.5 | 2.82 |
| Sample_T13C_bin.24 | 98.63  | 0.00 | 68  | 42.7 | Clostridiales       | 42.7 | 2.83 |
| Sample_T13C_bin.25 | 99.27  | 0.00 | 111 | 52.3 | Firmicutes          | 52.3 | 2.57 |
| Sample_T13C_bin.28 | 87.01  | 0.96 | 41  | 60.6 | Bacteroidetes       | 60.6 | 2.16 |

|                    |        |      |     |      |                    |      |      |
|--------------------|--------|------|-----|------|--------------------|------|------|
| Sample_T13C_bin.29 | 97.32  | 4.17 | 79  | 56.4 | Bifidobacteriaceae | 56.4 | 2.29 |
| Sample_C13A_bin.30 | 97.98  | 2.01 | 293 | 61.1 | Clostridiales      | 61.1 | 2.21 |
| Sample_C13A_bin.31 | 91.69  | 2.53 | 102 | 41.8 | Clostridiales      | 41.8 | 3.00 |
| Sample_C13A_bin.32 | 97.84  | 0.10 | 36  | 51.3 | Bacteria           | 51.3 | 1.80 |
| Sample_C13A_bin.33 | 100.00 | 1.09 | 173 | 48.3 | Clostridiales      | 48.3 | 2.82 |
| Sample_C13A_bin.34 | 97.75  | 2.81 | 163 | 30.5 | Bacteria           | 30.5 | 3.32 |
| Sample_C13A_bin.35 | 94.86  | 0.90 | 519 | 45.1 | Bacteroidales      | 45.1 | 4.39 |
| Sample_C13A_bin.36 | 93.62  | 0.63 | 213 | 43.2 | Bacteroidales      | 43.2 | 4.67 |
| Sample_C13A_bin.37 | 98.65  | 0.34 | 31  | 38.8 | Clostridiales      | 38.8 | 2.13 |
| Sample_C12A_bin.32 | 90.18  | 3.34 | 56  | 44.8 | Prevotella         | 44.8 | 3.34 |
| Sample_C6A_bin.35  | 81.18  | 4.85 | 135 | 58.9 | Clostridiales      | 58.9 | 2.16 |
| Sample_C6A_bin.34  | 84.66  | 0.73 | 207 | 43.5 | Clostridiales      | 43.5 | 2.58 |
| Sample_C6A_bin.37  | 97.31  | 0.00 | 33  | 44.4 | Clostridiales      | 44.4 | 2.63 |
| Sample_C6A_bin.36  | 92.19  | 3.85 | 71  | 60.4 | Bacteroidetes      | 60.4 | 2.49 |
| Sample_C6A_bin.31  | 96.27  | 1.72 | 269 | 43.5 | Bacteroidales      | 43.5 | 2.89 |
| Sample_T7A_bin.33  | 97.98  | 0.00 | 76  | 52.3 | Clostridiales      | 52.3 | 3.07 |
| Sample_C6A_bin.32  | 99.32  | 1.13 | 62  | 50.8 | Prevotella         | 50.8 | 3.44 |
| Sample_T3C_bin.25  | 96.77  | 1.97 | 186 | 41.8 | Bacteria           | 41.8 | 3.84 |
| Sample_T3C_bin.27  | 99.98  | 2.10 | 21  | 43.5 | Selenomonadales    | 43.5 | 2.40 |
| Sample_T6A_bin.8   | 98.63  | 0.00 | 30  | 43.2 | Clostridiales      | 43.2 | 2.54 |
| Sample_T6A_bin.9   | 97.31  | 0.00 | 64  | 44.3 | Clostridiales      | 44.3 | 2.65 |
| Sample_T3C_bin.20  | 95.78  | 1.27 | 120 | 48.3 | Clostridiales      | 48.3 | 2.81 |
| Sample_T6A_bin.7   | 89.41  | 2.02 | 120 | 40.9 | Lachnospiraceae    | 40.9 | 2.36 |
| Sample_T6A_bin.1   | 95.97  | 1.28 | 42  | 46.8 | Clostridiales      | 46.8 | 2.73 |
| Sample_T6A_bin.2   | 94.33  | 1.92 | 76  | 58.3 | Bacteroidetes      | 58.3 | 3.14 |
| Sample_T15C_bin.40 | 87.28  | 2.85 | 383 | 46.3 | Bacteroidales      | 46.3 | 3.60 |
| Sample_T3C_bin.23  | 96.13  | 1.21 | 37  | 43.6 | Lachnospiraceae    | 43.6 | 2.75 |
| Sample_C5A_bin.38  | 80.55  | 0.23 | 234 | 60.3 | Bifidobacteriaceae | 60.3 | 1.73 |
| Sample_C5A_bin.39  | 98.63  | 0.00 | 59  | 42.8 | Clostridiales      | 42.8 | 2.85 |
| Sample_C3C_bin.29  | 89.76  | 0.00 | 192 | 46   | Bacteroidales      | 46   | 3.51 |
| Sample_C3C_bin.28  | 100.00 | 0.00 | 116 | 55.5 | Proteobacteria     | 55.5 | 2.75 |
| Sample_C3C_bin.25  | 86.44  | 1.68 | 182 | 58.5 | Clostridiales      | 58.5 | 1.74 |
| Sample_C3C_bin.24  | 85.25  | 4.48 | 207 | 58.8 | Clostridiales      | 58.8 | 2.07 |
| Sample_C3C_bin.26  | 98.65  | 0.34 | 52  | 38.6 | Clostridiales      | 38.6 | 2.31 |
| Sample_C5A_bin.36  | 86.79  | 2.58 | 479 | 38.5 | Bacteroidales      | 38.5 | 2.94 |
| Sample_C3C_bin.20  | 95.67  | 1.92 | 67  | 54.5 | Bacteroidetes      | 54.5 | 2.12 |
| Sample_C3C_bin.23  | 84.75  | 1.01 | 220 | 59.7 | Clostridiales      | 59.7 | 1.99 |
| Sample_C3C_bin.22  | 98.65  | 2.68 | 31  | 42   | Clostridiales      | 42   | 2.68 |
| Sample_T3B_bin.35  | 82.75  | 1.72 | 150 | 42   | Bacteria           | 42   | 4.74 |

|                    |       |      |     |      |                    |      |      |
|--------------------|-------|------|-----|------|--------------------|------|------|
| Sample_T3B_bin.31  | 99.41 | 0.00 | 44  | 41.7 | Lachnospiraceae    | 41.7 | 2.52 |
| Sample_T3B_bin.32  | 99.61 | 0.00 | 65  | 45.4 | Bacteroidales      | 45.4 | 4.19 |
| Sample_T3B_bin.33  | 87.70 | 0.19 | 191 | 40.8 | Bacteroidales      | 40.8 | 2.81 |
| Sample_C10A_bin.47 | 83.77 | 1.68 | 210 | 56.2 | Clostridiales      | 56.2 | 2.52 |
| Sample_T4A_bin.7   | 98.63 | 0.00 | 52  | 43.2 | Clostridiales      | 43.2 | 2.62 |
| Sample_C12B_bin.17 | 99.53 | 0.00 | 29  | 60.1 | Bifidobacteriaceae | 60.1 | 2.39 |
| Sample_C12B_bin.14 | 97.65 | 1.34 | 57  | 46.1 | Clostridiales      | 46.1 | 2.38 |
| Sample_C1C_bin.42  | 87.57 | 1.27 | 18  | 49.3 | Clostridiales      | 49.3 | 2.31 |
| Sample_C12B_bin.12 | 95.74 | 0.69 | 85  | 59.3 | Clostridiales      | 59.3 | 1.86 |
| Sample_C12B_bin.13 | 98.98 | 4.77 | 98  | 44.9 | Prevotella         | 44.9 | 3.67 |
| Sample_C1C_bin.47  | 89.93 | 0.00 | 64  | 47   | Clostridiales      | 47   | 2.50 |
| Sample_C1C_bin.46  | 90.71 | 0.95 | 210 | 48.5 | Clostridiales      | 48.5 | 2.59 |
| Sample_C1C_bin.49  | 83.28 | 0.65 | 272 | 46.1 | Clostridiales      | 46.1 | 2.48 |
| Sample_C1C_bin.48  | 97.98 | 1.51 | 133 | 58.6 | Clostridiales      | 58.6 | 2.18 |
| Sample_C10A_bin.45 | 97.61 | 0.00 | 276 | 56.4 | Clostridiales      | 56.4 | 2.48 |
| Sample_C1A_bin.24  | 98.11 | 0.00 | 74  | 54.4 | Bacteroidales      | 54.4 | 2.41 |
| Sample_T12B_bin.8  | 89.39 | 3.02 | 86  | 62.5 | Clostridiales      | 62.5 | 1.76 |
| Sample_C1A_bin.26  | 88.79 | 1.17 | 93  | 41   | Lachnospiraceae    | 41   | 2.23 |
| Sample_C1A_bin.21  | 97.98 | 0.31 | 60  | 58.9 | Clostridiales      | 58.9 | 2.02 |
| Sample_T8A_bin.4   | 89.47 | 2.73 | 84  | 59.5 | Clostridiales      | 59.5 | 1.84 |
| Sample_C1A_bin.23  | 98.63 | 0.00 | 61  | 42.7 | Clostridiales      | 42.7 | 2.88 |
| Sample_C1A_bin.22  | 97.46 | 1.58 | 119 | 41   | Clostridiales      | 41   | 3.51 |
| Sample_C1A_bin.29  | 88.15 | 3.62 | 277 | 59   | Clostridiales      | 59   | 2.07 |
| Sample_T2A_bin.31  | 97.98 | 0.00 | 232 | 32.1 | Clostridiales      | 32.1 | 2.70 |
| Sample_T2A_bin.32  | 98.63 | 1.36 | 240 | 56.3 | Clostridiales      | 56.3 | 2.43 |
| Sample_T2A_bin.34  | 84.09 | 1.90 | 29  | 62.8 | Clostridiales      | 62.8 | 1.52 |
| Sample_T2A_bin.35  | 89.74 | 0.85 | 12  | 32.1 | Bacteria           | 32.1 | 1.86 |
| Sample_T2A_bin.36  | 94.77 | 0.37 | 58  | 44.3 | Bacteroidales      | 44.3 | 3.46 |
| Sample_T2A_bin.38  | 98.02 | 1.93 | 103 | 44.6 | Lachnospiraceae    | 44.6 | 2.72 |
| Sample_T8A_bin.12  | 98.85 | 0.00 | 73  | 48.7 | Bacteroidales      | 48.7 | 3.36 |
| Sample_C5B_bin.1   | 93.36 | 0.38 | 241 | 58.9 | Clostridiales      | 58.9 | 2.30 |
| Sample_C5B_bin.3   | 93.98 | 0.46 | 272 | 59.8 | Bifidobacteriaceae | 59.8 | 2.40 |
| Sample_C5B_bin.2   | 99.32 | 0.67 | 59  | 54.7 | Clostridiales      | 54.7 | 2.63 |
| Sample_C5B_bin.5   | 98.65 | 0.67 | 29  | 33.3 | Clostridiales      | 33.3 | 2.10 |
| Sample_C5B_bin.7   | 98.77 | 1.12 | 58  | 46.5 | Bacteroidales      | 46.5 | 4.25 |
| Sample_C5B_bin.6   | 98.34 | 0.34 | 26  | 35.8 | Clostridiales      | 35.8 | 2.70 |
| Sample_C5B_bin.9   | 92.45 | 1.79 | 43  | 43.4 | Lachnospiraceae    | 43.4 | 2.74 |
| Sample_C5B_bin.8   | 99.63 | 0.17 | 78  | 57.7 | Clostridiales      | 57.7 | 2.54 |
| Sample_T14A_bin.41 | 97.58 | 0.16 | 74  | 26.9 | Clostridiales      | 26.9 | 2.77 |

|                    |       |      |     |      |                    |      |      |
|--------------------|-------|------|-----|------|--------------------|------|------|
| Sample_T18A_bin.21 | 96.14 | 1.36 | 297 | 56.2 | Clostridiales      | 56.2 | 2.43 |
| Sample_T18A_bin.20 | 97.31 | 0.00 | 29  | 53.7 | Clostridiales      | 53.7 | 1.86 |
| Sample_T18A_bin.26 | 85.74 | 2.11 | 326 | 44.4 | Clostridiales      | 44.4 | 2.67 |
| Sample_C2B_bin.58  | 92.06 | 1.54 | 50  | 58.9 | Bacteroidetes      | 58.9 | 2.88 |
| Sample_T13C_bin.2  | 98.51 | 0.60 | 225 | 45.3 | Bacteroidales      | 45.3 | 3.66 |
| Sample_C2B_bin.57  | 92.82 | 2.18 | 112 | 49.6 | Clostridiales      | 49.6 | 1.93 |
| Sample_T18A_bin.29 | 99.32 | 1.01 | 17  | 40.4 | Clostridiales      | 40.4 | 2.16 |
| Sample_T18A_bin.28 | 99.25 | 0.37 | 71  | 49.5 | Bacteroidales      | 49.5 | 2.76 |
| Sample_C2B_bin.52  | 96.97 | 0.00 | 28  | 46.3 | Clostridiales      | 46.3 | 2.19 |
| Sample_T11C_bin.26 | 97.27 | 0.00 | 38  | 51.2 | Clostridiales      | 51.2 | 2.30 |
| Sample_C2B_bin.50  | 85.98 | 0.32 | 67  | 44.6 | Clostridiales      | 44.6 | 2.60 |
| Sample_C2B_bin.51  | 92.51 | 1.02 | 186 | 60.6 | Clostridiales      | 60.6 | 2.20 |
| Sample_C1B_bin.19  | 97.98 | 0.00 | 193 | 50.1 | Clostridiales      | 50.1 | 2.80 |
| Sample_C1B_bin.18  | 90.58 | 2.79 | 113 | 42.3 | Bacteroidales      | 42.3 | 3.50 |
| Sample_T13C_bin.7  | 87.58 | 2.36 | 104 | 57.2 | Clostridiales      | 57.2 | 1.91 |
| Sample_C1B_bin.17  | 96.64 | 4.70 | 63  | 59   | Clostridiales      | 59   | 2.01 |
| Sample_C1B_bin.10  | 95.63 | 2.43 | 204 | 45   | Clostridiales      | 45   | 1.74 |
| Sample_C1B_bin.13  | 94.94 | 2.44 | 55  | 38.3 | Clostridiales      | 38.3 | 2.68 |
| Sample_C1B_bin.12  | 93.57 | 1.67 | 81  | 41.7 | Bacteroidales      | 41.7 | 4.09 |
| Sample_T13C_bin.5  | 92.86 | 0.96 | 260 | 46.5 | Bacteroidetes      | 46.5 | 2.00 |
| Sample_T5C_bin.40  | 98.65 | 0.00 | 66  | 44.2 | Clostridiales      | 44.2 | 2.80 |
| Sample_T5C_bin.41  | 95.78 | 1.38 | 180 | 45.6 | Bacteroidales      | 45.6 | 3.44 |
| Sample_T5C_bin.42  | 91.12 | 0.67 | 94  | 57.2 | Clostridiales      | 57.2 | 2.42 |
| Sample_T5C_bin.44  | 84.11 | 1.06 | 27  | 62   | Clostridiales      | 62   | 1.80 |
| Sample_T5C_bin.45  | 86.57 | 2.03 | 53  | 59.2 | Clostridiales      | 59.2 | 2.01 |
| Sample_T5C_bin.46  | 87.91 | 1.01 | 47  | 56.4 | Clostridiales      | 56.4 | 2.35 |
| Sample_T5C_bin.48  | 97.95 | 0.68 | 25  | 55.4 | Bacteria           | 55.4 | 2.72 |
| Sample_T5C_bin.49  | 97.55 | 0.17 | 88  | 57.6 | Clostridiales      | 57.6 | 2.33 |
| Sample_T7C_bin.13  | 99.21 | 2.90 | 85  | 43.5 | Lachnospiraceae    | 43.5 | 2.87 |
| Sample_T18B_bin.1  | 98.14 | 0.37 | 193 | 49.8 | Bacteroidales      | 49.8 | 2.71 |
| Sample_T4C_bin.41  | 91.84 | 0.75 | 53  | 42.1 | Bacteroidales      | 42.1 | 4.22 |
| Sample_T4C_bin.40  | 99.77 | 0.94 | 150 | 38.2 | Clostridiales      | 38.2 | 3.05 |
| Sample_T4C_bin.43  | 95.10 | 1.01 | 67  | 46   | Prevotella         | 46   | 3.64 |
| Sample_T4C_bin.42  | 91.94 | 0.67 | 115 | 60.6 | Clostridiales      | 60.6 | 2.35 |
| Sample_T4C_bin.45  | 98.73 | 0.02 | 99  | 48.3 | Firmicutes         | 48.3 | 2.16 |
| Sample_T4C_bin.44  | 94.63 | 0.00 | 26  | 59.3 | Bacteroidetes      | 59.3 | 2.63 |
| Sample_T18B_bin.6  | 90.89 | 2.17 | 330 | 48.9 | Clostridiales      | 48.9 | 2.38 |
| Sample_C13C_bin.11 | 96.84 | 0.97 | 115 | 50   | Lachnospiraceae    | 50   | 2.81 |
| Sample_C13C_bin.12 | 99.96 | 0.20 | 52  | 50.8 | Enterobacteriaceae | 50.8 | 4.56 |

|                    |        |      |     |      |                |      |      |
|--------------------|--------|------|-----|------|----------------|------|------|
| Sample_C13C_bin.13 | 98.94  | 2.11 | 84  | 47.7 | Clostridiales  | 47.7 | 3.11 |
| Sample_C3A_bin.38  | 95.45  | 4.20 | 222 | 41.7 | Bacteroidales  | 41.7 | 5.22 |
| Sample_C13C_bin.15 | 94.99  | 0.00 | 33  | 59   | Clostridiales  | 59   | 2.56 |
| Sample_C13C_bin.16 | 98.27  | 4.39 | 70  | 42.4 | Bacteria       | 42.4 | 4.85 |
| Sample_C13C_bin.17 | 93.69  | 0.32 | 145 | 40.6 | Clostridiales  | 40.6 | 2.29 |
| Sample_C13C_bin.18 | 98.60  | 1.17 | 138 | 57.7 | Clostridiales  | 57.7 | 3.18 |
| Sample_C13C_bin.19 | 99.42  | 0.13 | 54  | 44.9 | Bacteroidales  | 44.9 | 4.85 |
| Sample_C3A_bin.37  | 96.59  | 1.81 | 277 | 56.3 | Clostridiales  | 56.3 | 2.68 |
| Sample_C3A_bin.30  | 92.41  | 3.37 | 33  | 26   | Bacteria       | 26   | 1.27 |
| Sample_T4B_bin.7   | 93.93  | 2.01 | 84  | 49.7 | Clostridiales  | 49.7 | 2.04 |
| Sample_C3A_bin.32  | 87.79  | 0.67 | 35  | 45.2 | Clostridiales  | 45.2 | 1.69 |
| Sample_C3A_bin.33  | 95.00  | 0.93 | 162 | 49.9 | Bacteroidales  | 49.9 | 2.55 |
| Sample_C14A_bin.11 | 98.48  | 0.17 | 289 | 37.4 | Clostridiales  | 37.4 | 2.74 |
| Sample_C6B_bin.17  | 95.97  | 0.00 | 29  | 41.3 | Clostridiales  | 41.3 | 2.56 |
| Sample_C6B_bin.14  | 98.10  | 3.16 | 40  | 43.9 | Clostridiales  | 43.9 | 2.82 |
| Sample_T4B_bin.6   | 87.38  | 0.00 | 182 | 36.2 | Clostridiales  | 36.2 | 2.20 |
| Sample_C6B_bin.12  | 90.96  | 3.15 | 496 | 45.2 | Clostridiales  | 45.2 | 2.56 |
| Sample_C6B_bin.13  | 89.26  | 1.41 | 81  | 28.9 | Clostridiales  | 28.9 | 2.75 |
| Sample_C6B_bin.10  | 97.27  | 0.00 | 16  | 51.4 | Clostridiales  | 51.4 | 2.09 |
| Sample_C6B_bin.11  | 92.41  | 2.25 | 140 | 26   | Bacteria       | 26   | 1.28 |
| Sample_T17A_bin.20 | 98.65  | 1.13 | 70  | 43.4 | Bacteroidales  | 43.4 | 4.93 |
| Sample_T17A_bin.21 | 98.73  | 3.16 | 31  | 42.4 | Clostridiales  | 42.4 | 2.73 |
| Sample_T17A_bin.22 | 98.73  | 0.00 | 23  | 43.8 | Clostridiales  | 43.8 | 2.89 |
| Sample_T17A_bin.23 | 99.68  | 0.16 | 75  | 48.9 | Clostridiales  | 48.9 | 2.98 |
| Sample_T17A_bin.24 | 84.40  | 0.84 | 352 | 49.9 | Proteobacteria | 49.9 | 1.68 |
| Sample_C6B_bin.18  | 90.18  | 4.44 | 172 | 58   | Clostridiales  | 58   | 2.48 |
| Sample_C6B_bin.19  | 89.70  | 0.00 | 295 | 43.7 | Clostridiales  | 43.7 | 1.75 |
| Sample_C2A_bin.50  | 93.93  | 1.34 | 152 | 49.6 | Clostridiales  | 49.6 | 2.00 |
| Sample_C8C_bin.40  | 97.31  | 0.00 | 240 | 46.2 | Clostridiales  | 46.2 | 2.93 |
| Sample_C8C_bin.41  | 96.42  | 0.68 | 126 | 56.2 | Clostridiales  | 56.2 | 2.50 |
| Sample_C8C_bin.42  | 83.98  | 0.05 | 46  | 26.7 | Bacteria       | 26.7 | 1.09 |
| Sample_C8C_bin.43  | 93.93  | 2.01 | 170 | 49.5 | Clostridiales  | 49.5 | 1.99 |
| Sample_C8C_bin.44  | 93.18  | 1.44 | 55  | 59.6 | Bacteroidetes  | 59.6 | 3.13 |
| Sample_C8C_bin.47  | 99.03  | 0.96 | 27  | 54.3 | Bacteroidetes  | 54.3 | 2.14 |
| Sample_T11A_bin.2  | 100.00 | 0.11 | 19  | 48.4 | Proteobacteria | 48.4 | 2.71 |
| Sample_T11A_bin.7  | 97.23  | 0.67 | 40  | 35.9 | Clostridiales  | 35.9 | 2.72 |
| Sample_C2C_bin.45  | 98.65  | 0.46 | 52  | 44.1 | Clostridiales  | 44.1 | 2.93 |
| Sample_C2C_bin.42  | 98.65  | 0.67 | 23  | 33   | Clostridiales  | 33   | 2.46 |
| Sample_T15B_bin.13 | 95.41  | 0.71 | 90  | 34.1 | Bacteria       | 34.1 | 2.06 |

|                    |        |      |     |      |                    |      |      |
|--------------------|--------|------|-----|------|--------------------|------|------|
| Sample_T15B_bin.10 | 100.00 | 1.20 | 72  | 47.1 | Selenomonadales    | 47.1 | 2.28 |
| Sample_T15B_bin.11 | 100.00 | 1.27 | 78  | 31.3 | Firmicutes         | 31.3 | 2.42 |
| Sample_T11A_bin.4  | 89.90  | 2.18 | 114 | 59.7 | Clostridiales      | 59.7 | 2.00 |
| Sample_T15C_bin.37 | 88.37  | 0.81 | 258 | 60.3 | Actinobacteria     | 60.3 | 1.79 |
| Sample_T7C_bin.17  | 80.99  | 0.02 | 347 | 46.4 | Clostridiales      | 46.4 | 1.74 |
| Sample_T15C_bin.36 | 98.87  | 1.92 | 33  | 58.8 | Bacteroidetes      | 58.8 | 3.04 |
| Sample_T15C_bin.35 | 97.98  | 0.34 | 25  | 44.5 | Clostridiales      | 44.5 | 2.03 |
| Sample_T15C_bin.34 | 92.61  | 3.36 | 36  | 59.9 | Clostridiales      | 59.9 | 2.09 |
| Sample_T15C_bin.33 | 87.46  | 1.49 | 115 | 40.4 | Bacteroidales      | 40.4 | 3.24 |
| Sample_T8B_bin.20  | 96.58  | 0.67 | 66  | 37.4 | Clostridiales      | 37.4 | 2.87 |
| Sample_T8B_bin.21  | 98.30  | 0.00 | 54  | 50   | Bacteroidales      | 50   | 2.49 |
| Sample_T8B_bin.22  | 94.91  | 1.90 | 114 | 49.3 | Clostridiales      | 49.3 | 2.80 |
| Sample_T13B_bin.44 | 99.18  | 0.00 | 29  | 46.5 | Lactobacillales    | 46.5 | 2.17 |
| Sample_T8B_bin.25  | 99.68  | 0.04 | 165 | 48.7 | Proteobacteria     | 48.7 | 2.56 |
| Sample_T8B_bin.26  | 97.55  | 3.41 | 69  | 46.4 | Bacteroidales      | 46.4 | 4.65 |
| Sample_T8B_bin.27  | 87.79  | 1.59 | 153 | 60   | Clostridiales      | 60   | 1.90 |
| Sample_T8B_bin.28  | 91.41  | 3.34 | 502 | 49.2 | Bacteroidales      | 49.2 | 3.05 |
| Sample_T8B_bin.29  | 99.32  | 0.57 | 29  | 43.8 | Clostridiales      | 43.8 | 2.89 |
| Sample_T15C_bin.30 | 97.31  | 0.22 | 37  | 46.4 | Bacteroidales      | 46.4 | 4.30 |
| Sample_T13B_bin.49 | 91.94  | 0.67 | 39  | 59.7 | Clostridiales      | 59.7 | 2.18 |
| Sample_T13C_bin.31 | 82.55  | 0.00 | 54  | 62.5 | Clostridiales      | 62.5 | 1.66 |
| Sample_T13C_bin.30 | 98.94  | 1.27 | 29  | 48   | Clostridiales      | 48   | 3.45 |
| Sample_T13C_bin.32 | 100.00 | 1.61 | 43  | 59.6 | Actinobacteria     | 59.6 | 2.28 |
| Sample_T13C_bin.34 | 97.17  | 3.07 | 27  | 60.4 | Bifidobacteriaceae | 60.4 | 2.37 |
| Sample_T13C_bin.36 | 88.89  | 0.84 | 359 | 41.8 | Clostridiales      | 41.8 | 2.75 |
| Sample_T13C_bin.38 | 99.38  | 0.60 | 41  | 56   | Selenomonadales    | 56   | 2.35 |
| Sample_C6C_bin.3   | 96.64  | 0.34 | 119 | 36.7 | Clostridiales      | 36.7 | 1.97 |
| Sample_T15A_bin.26 | 97.98  | 0.34 | 21  | 44.5 | Clostridiales      | 44.5 | 1.93 |
| Sample_T15A_bin.27 | 98.55  | 2.01 | 28  | 43.8 | Clostridiales      | 43.8 | 3.19 |
| Sample_T15A_bin.24 | 90.93  | 0.00 | 108 | 62   | Clostridiales      | 62   | 2.02 |
| Sample_T15A_bin.25 | 95.97  | 0.00 | 46  | 40.9 | Clostridiales      | 40.9 | 2.72 |
| Sample_C12A_bin.22 | 96.59  | 0.84 | 30  | 58.6 | Clostridiales      | 58.6 | 2.98 |
| Sample_T15A_bin.20 | 82.75  | 3.45 | 78  | 43.3 | Bacteria           | 43.3 | 3.26 |
| Sample_T15A_bin.21 | 95.41  | 0.00 | 197 | 42   | Lachnospiraceae    | 42   | 2.29 |
| Sample_T5A_bin.12  | 99.38  | 0.60 | 135 | 45.6 | Selenomonadales    | 45.6 | 1.89 |
| Sample_T11C_bin.2  | 86.03  | 0.84 | 23  | 38.4 | Clostridiales      | 38.4 | 2.50 |
| Sample_T15A_bin.29 | 85.46  | 0.56 | 42  | 43.7 | Bacteroidales      | 43.7 | 2.80 |
| Sample_T10B_bin.28 | 97.31  | 0.00 | 63  | 53.4 | Clostridiales      | 53.4 | 2.21 |
| Sample_T10B_bin.29 | 98.73  | 0.65 | 97  | 48.6 | Firmicutes         | 48.6 | 2.12 |



|                    |        |      |     |      |                 |      |      |
|--------------------|--------|------|-----|------|-----------------|------|------|
| Sample_T14B_bin.28 | 98.10  | 1.27 | 60  | 31.5 | Firmicutes      | 31.5 | 2.27 |
| Sample_T10B_bin.22 | 99.36  | 0.64 | 141 | 38.4 | Clostridiales   | 38.4 | 2.78 |
| Sample_T10B_bin.23 | 85.22  | 3.23 | 228 | 60.2 | Clostridiales   | 60.2 | 1.77 |
| Sample_T14B_bin.29 | 92.95  | 2.01 | 102 | 58.3 | Clostridiales   | 58.3 | 2.78 |
| Sample_T7C_bin.18  | 98.55  | 0.39 | 152 | 40.9 | Lachnospiraceae | 40.9 | 3.79 |
| Sample_T3A_bin.19  | 98.53  | 0.67 | 36  | 38.1 | Clostridiales   | 38.1 | 1.96 |
| Sample_T10B_bin.24 | 92.84  | 1.27 | 41  | 44.2 | Clostridiales   | 44.2 | 2.89 |
| Sample_T10B_bin.25 | 99.32  | 0.67 | 65  | 40.9 | Clostridiales   | 40.9 | 2.02 |
| Sample_T12C_bin.8  | 98.65  | 0.00 | 27  | 44.2 | Clostridiales   | 44.2 | 2.71 |
| Sample_C13A_bin.29 | 96.01  | 0.00 | 133 | 49.4 | Bacteroidales   | 49.4 | 2.69 |
| Sample_C13A_bin.28 | 94.22  | 1.75 | 110 | 42.3 | Clostridiales   | 42.3 | 2.35 |
| Sample_T12C_bin.4  | 95.62  | 0.28 | 78  | 44.4 | Bacteroidales   | 44.4 | 3.52 |
| Sample_C13A_bin.26 | 99.98  | 1.50 | 87  | 44.1 | Selenomonadales | 44.1 | 2.28 |
| Sample_T12C_bin.6  | 92.91  | 0.85 | 117 | 42.8 | Lachnospiraceae | 42.8 | 2.99 |
| Sample_C13A_bin.24 | 99.32  | 0.00 | 23  | 36   | Clostridiales   | 36   | 2.61 |
| Sample_T12C_bin.1  | 100.00 | 0.95 | 111 | 44.4 | Clostridiales   | 44.4 | 2.72 |
| Sample_C13A_bin.21 | 85.89  | 0.00 | 354 | 42   | Lachnospiraceae | 42   | 2.19 |
| Sample_C13A_bin.20 | 91.23  | 4.48 | 763 | 37   | Clostridiales   | 37   | 4.11 |
| Sample_C6A_bin.28  | 96.64  | 0.00 | 29  | 41.3 | Clostridiales   | 41.3 | 2.53 |
| Sample_C6A_bin.26  | 87.74  | 1.73 | 196 | 47.1 | Lachnospiraceae | 47.1 | 2.44 |
| Sample_C6A_bin.27  | 93.47  | 1.01 | 97  | 36   | Clostridiales   | 36   | 2.79 |
| Sample_C6A_bin.25  | 83.36  | 0.48 | 265 | 43   | Lachnospiraceae | 43   | 1.90 |
| Sample_C6A_bin.21  | 94.07  | 1.17 | 432 | 41.1 | Clostridiales   | 41.1 | 2.93 |
| Sample_T6B_bin.7   | 97.98  | 0.00 | 17  | 38.2 | Clostridiales   | 38.2 | 1.86 |
| Sample_T6B_bin.6   | 90.02  | 2.38 | 238 | 56.5 | Clostridiales   | 56.5 | 2.27 |
| Sample_T11B_bin.36 | 92.51  | 0.48 | 116 | 41.1 | Lachnospiraceae | 41.1 | 3.46 |
| Sample_T6B_bin.4   | 82.41  | 0.69 | 69  | 61.6 | Clostridiales   | 61.6 | 1.87 |
| Sample_T6B_bin.3   | 93.94  | 1.48 | 92  | 44.1 | Clostridiales   | 44.1 | 3.20 |
| Sample_T11B_bin.31 | 99.51  | 1.44 | 36  | 54.5 | Bacteroidetes   | 54.5 | 2.36 |
| Sample_T11B_bin.32 | 97.27  | 1.01 | 29  | 51.3 | Clostridiales   | 51.3 | 2.38 |
| Sample_T11B_bin.38 | 84.22  | 1.01 | 376 | 55.4 | Clostridiales   | 55.4 | 2.01 |
| Sample_T6B_bin.9   | 91.98  | 3.48 | 180 | 40.7 | Clostridiales   | 40.7 | 3.50 |
| Sample_C11B_bin.23 | 96.91  | 0.00 | 173 | 43.1 | Clostridiales   | 43.1 | 2.48 |
| Sample_C11A_bin.45 | 86.89  | 1.67 | 77  | 46.4 | Bacteroidales   | 46.4 | 3.31 |
| Sample_C11A_bin.43 | 100.00 | 1.27 | 63  | 31.4 | Firmicutes      | 31.4 | 2.37 |
| Sample_C11A_bin.42 | 98.65  | 0.00 | 19  | 44   | Clostridiales   | 44   | 2.76 |
| Sample_C11A_bin.41 | 97.30  | 0.84 | 95  | 33.9 | Bacteria        | 33.9 | 2.24 |
| Sample_C3C_bin.38  | 96.56  | 0.56 | 104 | 57   | Clostridiales   | 57   | 2.38 |
| Sample_C3C_bin.39  | 99.30  | 3.26 | 128 | 58.3 | Clostridiales   | 58.3 | 2.97 |

|                    |        |      |     |      |                     |      |      |
|--------------------|--------|------|-----|------|---------------------|------|------|
| Sample_C3C_bin.34  | 98.70  | 1.11 | 52  | 49.7 | Bacteroidales       | 49.7 | 2.66 |
| Sample_C3C_bin.30  | 97.98  | 1.01 | 16  | 44.6 | Clostridiales       | 44.6 | 1.98 |
| Sample_C3C_bin.31  | 96.97  | 1.12 | 259 | 60.1 | Bacteroidetes       | 60.1 | 2.78 |
| Sample_T15A_bin.19 | 80.46  | 3.44 | 386 | 44.2 | Clostridiales       | 44.2 | 2.81 |
| Sample_C5C_bin.1   | 88.14  | 0.31 | 223 | 46.6 | Bacteroidales       | 46.6 | 3.81 |
| Sample_T7C_bin.12  | 94.83  | 1.16 | 35  | 48.7 | Clostridiales       | 48.7 | 2.73 |
| Sample_T8C_bin.8   | 98.81  | 0.00 | 112 | 60.1 | Bacteroidetes       | 60.1 | 2.62 |
| Sample_T8C_bin.1   | 83.48  | 1.36 | 30  | 56.7 | Clostridiales       | 56.7 | 2.15 |
| Sample_T8C_bin.2   | 98.65  | 0.34 | 66  | 39.1 | Clostridiales       | 39.1 | 2.38 |
| Sample_T8C_bin.3   | 91.72  | 0.72 | 414 | 42.4 | Bacteria            | 42.4 | 3.90 |
| Sample_T8C_bin.4   | 91.62  | 0.58 | 199 | 45.6 | Bacteroidales       | 45.6 | 3.99 |
| Sample_T8C_bin.5   | 98.38  | 0.81 | 57  | 52.9 | Clostridia          | 52.9 | 2.17 |
| Sample_T8C_bin.6   | 97.95  | 1.36 | 30  | 57.7 | Bacteria            | 57.7 | 3.09 |
| Sample_T8C_bin.7   | 88.32  | 1.01 | 295 | 58.9 | Clostridiales       | 58.9 | 2.00 |
| Sample_C5C_bin.2   | 89.10  | 0.70 | 42  | 46.3 | Bacteroidales       | 46.3 | 3.32 |
| Sample_T6B_bin.24  | 100.00 | 0.18 | 26  | 60   | Bifidobacteriaceae  | 60   | 2.27 |
| Sample_C1C_bin.52  | 98.10  | 0.02 | 185 | 48.6 | Firmicutes          | 48.6 | 2.03 |
| Sample_C1C_bin.50  | 81.40  | 2.35 | 23  | 61.4 | Clostridiales       | 61.4 | 1.59 |
| Sample_T6B_bin.25  | 97.31  | 0.00 | 15  | 45.8 | Clostridiales       | 45.8 | 2.14 |
| Sample_C11C_bin.38 | 98.13  | 0.62 | 85  | 62.3 | Proteobacteria      | 62.3 | 2.50 |
| Sample_C1C_bin.54  | 97.48  | 0.13 | 101 | 42.3 | Clostridiales       | 42.3 | 2.53 |
| Sample_C1C_bin.55  | 96.30  | 0.00 | 242 | 49.7 | Clostridiales       | 49.7 | 2.91 |
| Sample_C11C_bin.34 | 89.54  | 0.56 | 128 | 44.4 | Bacteroidales       | 44.4 | 3.14 |
| Sample_C11C_bin.35 | 94.09  | 3.19 | 207 | 46.8 | Lachnospiraceae     | 46.8 | 2.84 |
| Sample_C11C_bin.36 | 93.25  | 0.09 | 81  | 40.7 | Bacteroidales       | 40.7 | 2.84 |
| Sample_C11C_bin.37 | 99.62  | 0.38 | 44  | 44   | Bacteroidales       | 44   | 3.04 |
| Sample_C11C_bin.30 | 87.30  | 3.35 | 209 | 43.6 | Lachnospiraceae     | 43.6 | 2.49 |
| Sample_C11C_bin.31 | 85.19  | 0.93 | 80  | 42.2 | Bacteroidales       | 42.2 | 3.21 |
| Sample_C11C_bin.32 | 97.98  | 0.00 | 40  | 51.7 | Clostridiales       | 51.7 | 2.56 |
| Sample_C6C_bin.59  | 85.70  | 0.25 | 75  | 46.7 | Bacteroidales       | 46.7 | 2.91 |
| Sample_C6C_bin.58  | 97.04  | 0.00 | 44  | 51.5 | Clostridiales       | 51.5 | 2.09 |
| Sample_C1A_bin.34  | 93.28  | 1.13 | 47  | 62.2 | Clostridiales       | 62.2 | 1.94 |
| Sample_C9B_bin.21  | 83.93  | 0.59 | 552 | 60.7 | Deltaproteobacteria | 60.7 | 2.93 |
| Sample_C1A_bin.33  | 89.65  | 0.63 | 87  | 44.6 | Clostridiales       | 44.6 | 2.44 |
| Sample_C1A_bin.30  | 99.32  | 1.68 | 28  | 40.6 | Clostridiales       | 40.6 | 2.18 |
| Sample_C6C_bin.51  | 93.77  | 0.63 | 219 | 48.7 | Clostridiales       | 48.7 | 2.68 |
| Sample_C6C_bin.50  | 89.41  | 2.16 | 230 | 59.8 | Bacteroidetes       | 59.8 | 2.48 |
| Sample_C6C_bin.53  | 90.60  | 0.00 | 54  | 61.3 | Clostridiales       | 61.3 | 2.18 |
| Sample_C6C_bin.52  | 96.04  | 0.00 | 215 | 56.4 | Clostridiales       | 56.4 | 2.40 |

|                    |        |      |     |      |                 |      |      |
|--------------------|--------|------|-----|------|-----------------|------|------|
| Sample_C6C_bin.55  | 92.41  | 2.25 | 18  | 26   | Bacteria        | 26   | 1.30 |
| Sample_C6C_bin.54  | 98.10  | 0.02 | 106 | 48.6 | Firmicutes      | 48.6 | 2.13 |
| Sample_C6C_bin.57  | 93.93  | 1.34 | 46  | 49.6 | Clostridiales   | 49.6 | 2.19 |
| Sample_C6C_bin.56  | 80.77  | 1.93 | 160 | 46.8 | Lachnospiraceae | 46.8 | 2.35 |
| Sample_T2A_bin.45  | 97.98  | 0.00 | 239 | 50   | Clostridiales   | 50   | 2.71 |
| Sample_T2A_bin.44  | 87.89  | 0.46 | 46  | 46   | Clostridiales   | 46   | 1.95 |
| Sample_T2A_bin.41  | 93.82  | 0.56 | 338 | 24.6 | Bacteria        | 24.6 | 1.31 |
| Sample_T2A_bin.40  | 86.57  | 0.00 | 72  | 44.3 | Clostridiales   | 44.3 | 2.98 |
| Sample_T6A_bin.43  | 96.09  | 0.95 | 199 | 48.2 | Clostridiales   | 48.2 | 3.08 |
| Sample_T6A_bin.45  | 99.19  | 0.40 | 43  | 41.8 | Lachnospiraceae | 41.8 | 2.49 |
| Sample_T6A_bin.44  | 81.20  | 1.34 | 296 | 59.6 | Clostridiales   | 59.6 | 1.91 |
| Sample_T11C_bin.21 | 90.93  | 0.67 | 239 | 62.1 | Clostridiales   | 62.1 | 1.94 |
| Sample_C6A_bin.30  | 99.30  | 1.86 | 84  | 58.2 | Clostridiales   | 58.2 | 2.89 |
| Sample_C2B_bin.1   | 100.00 | 0.11 | 23  | 29.4 | Bacteria        | 29.4 | 1.56 |
| Sample_C8B_bin.32  | 98.10  | 1.01 | 86  | 44.3 | Clostridiales   | 44.3 | 2.88 |
| Sample_C2B_bin.4   | 85.04  | 1.51 | 73  | 60.8 | Clostridiales   | 60.8 | 1.74 |
| Sample_C2B_bin.5   | 94.96  | 1.34 | 277 | 33.4 | Clostridiales   | 33.4 | 2.22 |
| Sample_C2B_bin.6   | 97.98  | 0.34 | 94  | 44.7 | Clostridiales   | 44.7 | 1.85 |
| Sample_C2B_bin.7   | 94.64  | 1.21 | 39  | 43.7 | Lachnospiraceae | 43.7 | 2.63 |
| Sample_C2B_bin.9   | 89.93  | 0.00 | 70  | 60.8 | Clostridiales   | 60.8 | 2.26 |
| Sample_C12A_bin.17 | 87.24  | 1.34 | 38  | 59.4 | Clostridiales   | 59.4 | 2.44 |
| Sample_C12A_bin.16 | 98.93  | 1.55 | 95  | 46.1 | Lachnospiraceae | 46.1 | 3.24 |
| Sample_C12A_bin.15 | 98.83  | 0.82 | 51  | 41.8 | Lachnospiraceae | 41.8 | 2.45 |
| Sample_C12A_bin.14 | 97.30  | 0.84 | 31  | 33.5 | Bacteria        | 33.5 | 2.23 |
| Sample_C12A_bin.12 | 99.32  | 0.02 | 69  | 50   | Clostridiales   | 50   | 3.08 |
| Sample_C12A_bin.10 | 81.28  | 0.00 | 50  | 46   | Clostridiales   | 46   | 1.98 |
| Sample_C12A_bin.19 | 97.55  | 1.88 | 129 | 41.9 | Bacteroidales   | 41.9 | 4.47 |
| Sample_C12A_bin.18 | 85.18  | 1.32 | 319 | 48.3 | Clostridiales   | 48.3 | 2.46 |
| Sample_C2B_bin.63  | 97.98  | 0.00 | 33  | 44.3 | Clostridiales   | 44.3 | 2.64 |
| Sample_C2B_bin.61  | 99.03  | 1.49 | 29  | 41.5 | Lachnospiraceae | 41.5 | 3.16 |
| Sample_C2B_bin.60  | 89.36  | 2.85 | 76  | 61.6 | Clostridiales   | 61.6 | 2.02 |
| Sample_C5B_bin.11  | 88.66  | 0.63 | 60  | 41.3 | Clostridiales   | 41.3 | 2.91 |
| Sample_C5B_bin.10  | 94.88  | 2.27 | 244 | 44   | Clostridiales   | 44   | 3.13 |
| Sample_C5B_bin.17  | 98.94  | 0.63 | 74  | 47.8 | Clostridiales   | 47.8 | 3.03 |
| Sample_C5B_bin.16  | 100.00 | 1.34 | 75  | 37   | Clostridiales   | 37   | 2.72 |
| Sample_C5B_bin.18  | 99.32  | 1.01 | 19  | 40.3 | Clostridiales   | 40.3 | 2.34 |
| Sample_T16C_bin.40 | 96.83  | 1.83 | 304 | 44.6 | Clostridiales   | 44.6 | 3.28 |
| Sample_T5C_bin.34  | 91.00  | 0.77 | 66  | 42.2 | Bacteroidales   | 42.2 | 3.29 |
| Sample_T5C_bin.37  | 97.17  | 0.58 | 96  | 40.7 | Bacteroidales   | 40.7 | 3.57 |

|                    |       |      |     |      |                 |      |      |
|--------------------|-------|------|-----|------|-----------------|------|------|
| Sample_T5C_bin.31  | 90.35 | 1.57 | 200 | 49.6 | Clostridiales   | 49.6 | 1.80 |
| Sample_T5C_bin.30  | 88.04 | 1.34 | 174 | 60   | Clostridiales   | 60   | 1.94 |
| Sample_T5C_bin.33  | 99.98 | 1.50 | 30  | 43.5 | Selenomonadales | 43.5 | 2.48 |
| Sample_T5C_bin.32  | 97.57 | 1.36 | 50  | 46.6 | Bacteroidales   | 46.6 | 4.12 |
| Sample_T4B_bin.9   | 97.27 | 0.50 | 46  | 51.4 | Clostridiales   | 51.4 | 2.15 |
| Sample_C14A_bin.24 | 96.29 | 3.86 | 244 | 37.3 | Clostridiales   | 37.3 | 2.53 |
| Sample_C14A_bin.25 | 97.58 | 4.95 | 26  | 46.1 | Lachnospiraceae | 46.1 | 2.89 |
| Sample_C3C_bin.4   | 88.03 | 2.24 | 15  | 59.1 | Clostridiales   | 59.1 | 1.94 |
| Sample_C14A_bin.27 | 98.65 | 0.67 | 101 | 37.1 | Clostridiales   | 37.1 | 2.85 |
| Sample_C2A_bin.5   | 87.37 | 0.67 | 48  | 60   | Clostridiales   | 60   | 2.12 |
| Sample_C14A_bin.23 | 96.77 | 1.61 | 249 | 59.9 | Actinobacteria  | 59.9 | 2.23 |
| Sample_C6B_bin.23  | 87.64 | 1.01 | 79  | 57.9 | Clostridiales   | 57.9 | 2.04 |
| Sample_C6B_bin.22  | 97.67 | 1.27 | 342 | 48.3 | Clostridiales   | 48.3 | 2.88 |
| Sample_C6B_bin.21  | 82.75 | 0.00 | 118 | 27   | Bacteria        | 27   | 2.85 |
| Sample_T4B_bin.8   | 90.70 | 1.33 | 197 | 60.9 | Clostridiales   | 60.9 | 2.09 |
| Sample_C14A_bin.28 | 89.39 | 3.48 | 463 | 41.3 | Clostridiales   | 41.3 | 3.05 |
| Sample_C6B_bin.26  | 98.32 | 0.00 | 85  | 44.5 | Clostridiales   | 44.5 | 2.88 |
| Sample_C3C_bin.8   | 97.98 | 0.67 | 54  | 36   | Clostridiales   | 36   | 2.86 |
| Sample_C3C_bin.9   | 99.36 | 1.74 | 107 | 31.6 | Firmicutes      | 31.6 | 2.25 |
| Sample_C8C_bin.39  | 98.55 | 2.74 | 104 | 46.7 | Lachnospiraceae | 46.7 | 3.40 |
| Sample_C6B_bin.9   | 98.65 | 0.00 | 51  | 32.2 | Clostridiales   | 32.2 | 2.73 |
| Sample_C6B_bin.4   | 95.30 | 1.01 | 30  | 51.6 | Clostridiales   | 51.6 | 2.14 |
| Sample_C8C_bin.34  | 97.31 | 0.67 | 14  | 53.1 | Clostridiales   | 53.1 | 2.06 |
| Sample_C6B_bin.6   | 98.73 | 0.02 | 101 | 48.5 | Firmicutes      | 48.5 | 2.14 |
| Sample_C11B_bin.53 | 95.91 | 4.76 | 77  | 58.6 | Clostridiales   | 58.6 | 3.11 |
| Sample_C8C_bin.31  | 91.94 | 0.00 | 31  | 60.3 | Clostridiales   | 60.3 | 1.95 |
| Sample_C6B_bin.1   | 98.73 | 1.36 | 22  | 43.7 | Lachnospiraceae | 43.7 | 2.86 |
| Sample_C6B_bin.2   | 90.62 | 0.00 | 197 | 59.2 | Bacteroidetes   | 59.2 | 2.80 |
| Sample_C6B_bin.3   | 99.05 | 0.38 | 86  | 43.4 | Bacteroidales   | 43.4 | 3.13 |
| Sample_T2B_bin.31  | 89.38 | 0.67 | 39  | 42.6 | Clostridiales   | 42.6 | 2.26 |
| Sample_T10A_bin.45 | 98.65 | 0.34 | 64  | 39   | Clostridiales   | 39   | 2.65 |
| Sample_T2B_bin.34  | 98.55 | 0.96 | 150 | 54.5 | Bacteroidetes   | 54.5 | 2.38 |
| Sample_T2B_bin.36  | 97.18 | 0.67 | 37  | 36.2 | Clostridiales   | 36.2 | 2.46 |
| Sample_T2B_bin.39  | 81.05 | 1.33 | 147 | 26.9 | Bacteria        | 26.9 | 1.08 |
| Sample_T2B_bin.38  | 95.31 | 0.95 | 230 | 49.2 | Clostridiales   | 49.2 | 2.35 |
| Sample_T10C_bin.16 | 95.90 | 1.37 | 77  | 44.3 | Bacteroidales   | 44.3 | 3.78 |
| Sample_T10C_bin.17 | 99.32 | 1.80 | 82  | 44.8 | Prevotella      | 44.8 | 3.83 |
| Sample_T10C_bin.10 | 94.51 | 0.84 | 81  | 48.8 | Clostridiales   | 48.8 | 2.53 |
| Sample_T10C_bin.11 | 92.35 | 1.32 | 255 | 50   | Bacteroidales   | 50   | 2.36 |

|                    |       |      |     |      |                    |      |      |
|--------------------|-------|------|-----|------|--------------------|------|------|
| Sample_T10C_bin.12 | 98.14 | 0.38 | 192 | 42.2 | Bacteroidales      | 42.2 | 4.72 |
| Sample_T10A_bin.35 | 98.07 | 0.58 | 65  | 45.1 | Bacteroidales      | 45.1 | 4.24 |
| Sample_T10A_bin.36 | 88.59 | 3.69 | 103 | 61.8 | Clostridiales      | 61.8 | 1.92 |
| Sample_T10A_bin.37 | 98.38 | 0.00 | 175 | 43.4 | Bacteria           | 43.4 | 4.04 |
| Sample_T10A_bin.30 | 97.85 | 0.68 | 49  | 57.3 | Clostridiales      | 57.3 | 2.76 |
| Sample_T10A_bin.31 | 88.59 | 0.00 | 178 | 60.9 | Clostridiales      | 60.9 | 2.28 |
| Sample_T10A_bin.33 | 96.25 | 0.34 | 231 | 61.2 | Clostridiales      | 61.2 | 2.69 |
| Sample_C12C_bin.55 | 84.65 | 1.72 | 154 | 60.5 | Bacteria           | 60.5 | 2.58 |
| Sample_T10A_bin.38 | 98.16 | 0.67 | 157 | 44.5 | Clostridiales      | 44.5 | 2.55 |
| Sample_T10A_bin.39 | 87.15 | 1.58 | 220 | 42.2 | Clostridiales      | 42.2 | 2.23 |
| Sample_C12C_bin.54 | 94.57 | 1.14 | 182 | 57.1 | Clostridiales      | 57.1 | 2.24 |
| Sample_T8B_bin.50  | 97.34 | 0.97 | 45  | 41.7 | Lachnospiraceae    | 41.7 | 2.64 |
| Sample_T5A_bin.17  | 97.18 | 0.00 | 55  | 43.3 | Bacteroidales      | 43.3 | 4.65 |
| Sample_T8A_bin.43  | 91.59 | 1.53 | 247 | 60.7 | Clostridiales      | 60.7 | 2.28 |
| Sample_T8A_bin.42  | 98.65 | 0.00 | 168 | 37.8 | Clostridiales      | 37.8 | 1.98 |
| Sample_T8A_bin.41  | 96.05 | 0.71 | 23  | 45.1 | Bacteroidales      | 45.1 | 4.95 |
| Sample_T8A_bin.40  | 98.10 | 0.63 | 359 | 44.6 | Clostridiales      | 44.6 | 2.69 |
| Sample_C6A_bin.17  | 97.31 | 1.34 | 16  | 51.8 | Clostridiales      | 51.8 | 2.18 |
| Sample_T14B_bin.9  | 95.63 | 2.34 | 78  | 40.8 | Lachnospiraceae    | 40.8 | 2.57 |
| Sample_T15A_bin.33 | 87.24 | 0.00 | 43  | 36.6 | Clostridiales      | 36.6 | 1.72 |
| Sample_T15A_bin.32 | 90.92 | 1.93 | 14  | 59.6 | Clostridiales      | 59.6 | 2.07 |
| Sample_C1A_bin.6   | 92.69 | 4.49 | 27  | 26.1 | Bacteria           | 26.1 | 1.27 |
| Sample_T4B_bin.14  | 88.64 | 0.81 | 21  | 45.9 | Clostridia         | 45.9 | 1.67 |
| Sample_T4B_bin.17  | 98.55 | 0.00 | 48  | 41.5 | Lachnospiraceae    | 41.5 | 2.76 |
| Sample_T8C_bin.28  | 97.95 | 0.00 | 128 | 58.3 | Clostridiales      | 58.3 | 3.22 |
| Sample_T4B_bin.11  | 98.32 | 0.00 | 100 | 36.3 | Clostridiales      | 36.3 | 2.59 |
| Sample_T4B_bin.10  | 99.30 | 1.17 | 66  | 57.9 | Clostridiales      | 57.9 | 3.07 |
| Sample_C8B_bin.5   | 98.79 | 1.92 | 36  | 58   | Bacteroidetes      | 58   | 3.27 |
| Sample_T4B_bin.12  | 95.97 | 0.00 | 73  | 38.1 | Clostridiales      | 38.1 | 1.84 |
| Sample_T10B_bin.39 | 92.94 | 0.00 | 138 | 43.1 | Lachnospiraceae    | 43.1 | 2.21 |
| Sample_T10B_bin.38 | 80.25 | 0.63 | 542 | 41.4 | Clostridiales      | 41.4 | 2.70 |
| Sample_T10B_bin.30 | 99.32 | 0.00 | 37  | 44   | Clostridiales      | 44   | 2.80 |
| Sample_T10B_bin.33 | 98.06 | 0.63 | 59  | 41.6 | Lachnospiraceae    | 41.6 | 2.73 |
| Sample_T8C_bin.25  | 99.32 | 1.01 | 35  | 40.8 | Clostridiales      | 40.8 | 2.17 |
| Sample_T10B_bin.37 | 87.08 | 1.04 | 137 | 44.3 | Lachnospiraceae    | 44.3 | 2.00 |
| Sample_T8C_bin.24  | 90.91 | 1.01 | 72  | 49.6 | Clostridiales      | 49.6 | 2.39 |
| Sample_T8C_bin.22  | 97.27 | 0.00 | 55  | 43.6 | Lachnospiraceae    | 43.6 | 2.84 |
| Sample_T14A_bin.40 | 98.65 | 1.34 | 105 | 36.4 | Clostridiales      | 36.4 | 1.96 |
| Sample_T8C_bin.21  | 89.27 | 1.97 | 137 | 51.2 | Enterobacteriaceae | 51.2 | 3.79 |

|                    |        |      |     |      |                    |      |      |
|--------------------|--------|------|-----|------|--------------------|------|------|
| Sample_T11B_bin.29 | 97.26  | 0.00 | 66  | 42.3 | Clostridiales      | 42.3 | 2.89 |
| Sample_T11B_bin.22 | 99.24  | 1.13 | 209 | 43.4 | Bacteroidales      | 43.4 | 3.06 |
| Sample_T11B_bin.21 | 93.95  | 0.00 | 98  | 41.4 | Clostridiales      | 41.4 | 3.04 |
| Sample_T11B_bin.20 | 93.87  | 1.21 | 90  | 60.7 | Clostridiales      | 60.7 | 2.29 |
| Sample_C6B_bin.56  | 87.91  | 0.67 | 97  | 61.6 | Clostridiales      | 61.6 | 1.94 |
| Sample_T11B_bin.24 | 93.74  | 1.68 | 85  | 59.5 | Bacteroidetes      | 59.5 | 2.97 |
| Sample_T14A_bin.43 | 90.44  | 2.53 | 56  | 24.9 | Bacteria           | 24.9 | 1.29 |
| Sample_T12B_bin.9  | 96.64  | 2.10 | 230 | 56   | Clostridiales      | 56   | 2.80 |
| Sample_T7A_bin.49  | 99.51  | 2.19 | 30  | 40.9 | Lachnospiraceae    | 40.9 | 2.61 |
| Sample_T7A_bin.44  | 95.30  | 0.00 | 81  | 41.2 | Clostridiales      | 41.2 | 2.60 |
| Sample_T12B_bin.4  | 93.83  | 0.00 | 283 | 42.7 | Clostridiales      | 42.7 | 2.70 |
| Sample_T7A_bin.46  | 93.75  | 0.96 | 24  | 54.8 | Bacteroidetes      | 54.8 | 1.95 |
| Sample_T12B_bin.1  | 93.65  | 1.87 | 55  | 45.3 | Lachnospiraceae    | 45.3 | 2.26 |
| Sample_T11B_bin.16 | 90.18  | 3.32 | 437 | 41.4 | Clostridiales      | 41.4 | 2.78 |
| Sample_T7A_bin.42  | 96.64  | 0.00 | 26  | 42.2 | Clostridiales      | 42.2 | 2.66 |
| Sample_T7A_bin.43  | 99.32  | 0.34 | 30  | 36.4 | Clostridiales      | 36.4 | 2.20 |
| Sample_T13A_bin.15 | 91.53  | 0.00 | 100 | 42.2 | Bacteroidales      | 42.2 | 3.99 |
| Sample_T14A_bin.45 | 94.72  | 2.03 | 339 | 43.3 | Clostridiales      | 43.3 | 3.04 |
| Sample_C5A_bin.11  | 98.65  | 0.00 | 224 | 36.3 | Clostridiales      | 36.3 | 2.51 |
| Sample_C5A_bin.12  | 93.80  | 3.36 | 69  | 37.4 | Clostridiales      | 37.4 | 2.23 |
| Sample_C5A_bin.13  | 96.85  | 0.00 | 162 | 29   | Bacteria           | 29   | 2.82 |
| Sample_C5A_bin.15  | 86.23  | 3.29 | 201 | 42.2 | Bacteroidales      | 42.2 | 3.77 |
| Sample_C5A_bin.16  | 93.53  | 1.21 | 35  | 43.6 | Lachnospiraceae    | 43.6 | 2.55 |
| Sample_C5A_bin.17  | 95.91  | 0.34 | 55  | 60.6 | Clostridiales      | 60.6 | 2.34 |
| Sample_T14A_bin.30 | 92.57  | 2.01 | 118 | 59.8 | Clostridiales      | 59.8 | 1.80 |
| Sample_T14B_bin.21 | 98.73  | 0.02 | 100 | 48.8 | Firmicutes         | 48.8 | 2.12 |
| Sample_T14A_bin.44 | 99.98  | 1.70 | 105 | 43.4 | Selenomonadales    | 43.4 | 2.59 |
| Sample_T14A_bin.32 | 99.51  | 2.90 | 85  | 46.1 | Lachnospiraceae    | 46.1 | 3.17 |
| Sample_T14A_bin.34 | 99.32  | 0.67 | 37  | 40.1 | Clostridiales      | 40.1 | 2.39 |
| Sample_C6C_bin.31  | 92.46  | 1.93 | 101 | 44.2 | Lachnospiraceae    | 44.2 | 2.43 |
| Sample_T14A_bin.47 | 91.80  | 1.27 | 187 | 42.2 | Lachnospiraceae    | 42.2 | 2.22 |
| Sample_C5A_bin.35  | 97.59  | 0.96 | 75  | 54.6 | Bacteroidetes      | 54.6 | 2.04 |
| Sample_T15C_bin.5  | 90.93  | 0.00 | 16  | 62.2 | Clostridiales      | 62.2 | 1.94 |
| Sample_T15C_bin.7  | 97.98  | 0.04 | 95  | 34.1 | Clostridiales      | 34.1 | 2.33 |
| Sample_T15C_bin.6  | 90.21  | 1.48 | 134 | 41.8 | Lachnospiraceae    | 41.8 | 3.02 |
| Sample_T15C_bin.2  | 93.75  | 2.47 | 211 | 50.1 | Lachnospiraceae    | 50.1 | 2.76 |
| Sample_C12B_bin.30 | 90.12  | 1.34 | 22  | 42.1 | Clostridiales      | 42.1 | 1.66 |
| Sample_C12B_bin.31 | 100.00 | 0.92 | 24  | 56.1 | Bifidobacteriaceae | 56.1 | 2.16 |
| Sample_C12B_bin.32 | 97.27  | 0.56 | 89  | 51.5 | Clostridiales      | 51.5 | 2.20 |

|                    |       |      |     |      |                     |      |      |
|--------------------|-------|------|-----|------|---------------------|------|------|
| Sample_C12B_bin.33 | 94.67 | 0.58 | 79  | 46.1 | Bacteroidales       | 46.1 | 2.98 |
| Sample_T15C_bin.9  | 98.63 | 0.00 | 89  | 42.5 | Clostridiales       | 42.5 | 3.01 |
| Sample_C11C_bin.23 | 87.04 | 0.14 | 326 | 60.6 | Deltaproteobacteria | 60.6 | 3.20 |
| Sample_C11C_bin.22 | 85.70 | 0.08 | 599 | 44.5 | Clostridiales       | 44.5 | 2.50 |
| Sample_C11C_bin.21 | 96.05 | 0.19 | 279 | 48.4 | Bacteroidales       | 48.4 | 3.85 |
| Sample_C6C_bin.49  | 97.98 | 0.00 | 84  | 47.3 | Clostridiales       | 47.3 | 2.57 |
| Sample_C11C_bin.27 | 99.51 | 3.37 | 74  | 54.3 | Bacteroidetes       | 54.3 | 2.27 |
| Sample_C11C_bin.26 | 91.70 | 1.36 | 346 | 55.9 | Bacteria            | 55.9 | 2.15 |
| Sample_C11C_bin.25 | 97.27 | 0.68 | 71  | 58.9 | Clostridiales       | 58.9 | 3.04 |
| Sample_C6C_bin.40  | 99.62 | 0.00 | 80  | 43.2 | Bacteroidales       | 43.2 | 3.23 |
| Sample_C11C_bin.28 | 92.03 | 2.89 | 90  | 58.5 | Clostridiales       | 58.5 | 2.16 |
| Sample_C6C_bin.47  | 94.52 | 0.00 | 115 | 44.4 | Clostridiales       | 44.4 | 2.58 |
| Sample_C6C_bin.44  | 94.63 | 1.34 | 87  | 58.4 | Clostridiales       | 58.4 | 2.50 |
| Sample_T2A_bin.56  | 99.98 | 1.50 | 24  | 43.4 | Selenomonadales     | 43.4 | 2.56 |
| Sample_T2A_bin.57  | 97.30 | 0.84 | 55  | 33.4 | Bacteria            | 33.4 | 2.18 |
| Sample_T2A_bin.54  | 98.65 | 0.67 | 181 | 33.3 | Clostridiales       | 33.3 | 2.24 |
| Sample_T2A_bin.52  | 99.32 | 1.01 | 34  | 40.8 | Clostridiales       | 40.8 | 2.01 |
| Sample_T2A_bin.53  | 96.64 | 0.00 | 16  | 50.1 | Clostridiales       | 50.1 | 2.44 |
| Sample_T2A_bin.50  | 95.60 | 2.00 | 158 | 46   | Clostridiales       | 46   | 2.53 |
| Sample_T2A_bin.51  | 87.65 | 3.14 | 18  | 47.6 | Lachnospiraceae     | 47.6 | 2.75 |
| Sample_T2A_bin.58  | 83.61 | 0.63 | 90  | 45.7 | Clostridiales       | 45.7 | 2.68 |
| Sample_C11A_bin.32 | 95.90 | 1.50 | 471 | 59   | Clostridiales       | 59   | 2.01 |
| Sample_C11A_bin.30 | 99.21 | 1.45 | 85  | 44.5 | Lachnospiraceae     | 44.5 | 2.87 |
| Sample_C11A_bin.31 | 99.19 | 2.42 | 87  | 59.7 | Actinobacteria      | 59.7 | 2.30 |
| Sample_C11A_bin.36 | 98.87 | 2.25 | 97  | 29.3 | Bacteria            | 29.3 | 2.60 |
| Sample_C11A_bin.34 | 83.39 | 4.17 | 154 | 42   | Bacteroidales       | 42   | 3.71 |
| Sample_C11A_bin.35 | 98.43 | 0.00 | 91  | 38.2 | Clostridiales       | 38.2 | 1.82 |
| Sample_C11A_bin.38 | 97.63 | 1.47 | 172 | 45.6 | Prevotella          | 45.6 | 3.38 |
| Sample_C11A_bin.39 | 99.40 | 1.20 | 47  | 47.4 | Selenomonadales     | 47.4 | 2.09 |
| Sample_C1A_bin.9   | 98.60 | 1.17 | 113 | 58   | Clostridiales       | 58   | 3.18 |
| Sample_C6B_bin.16  | 95.00 | 0.68 | 114 | 44.7 | Bacteroidales       | 44.7 | 3.60 |

Table S5. Genomic information of 389 species-level genome bins (SGBs)

| MAG ID         | SGBs      | Genome information |                   |                   |                 |                 |                 |                | CheckM estimation    |                  |                   | Taxonomic assignment |                        |                   |                               |
|----------------|-----------|--------------------|-------------------|-------------------|-----------------|-----------------|-----------------|----------------|----------------------|------------------|-------------------|----------------------|------------------------|-------------------|-------------------------------|
|                |           | Rename_ID          | Number of contigs | Genome size (Mbp) | N50 length (bp) | N90 length (bp) | Max length (bp) | GC content (%) | Sequencing depth (X) | Completeness (%) | Contamination (%) | Checkm lineage       | Cultured species (Y/N) | New_species (Y/N) | Phylum                        |
| Sample_T17C.9  | T17C.M009 | 45                 | 3.77              | 116779            | 62315           | 371500          | 44.16           | 411.46         | 99.16                | 0.28             | Bacteroidales     | N                    | N                      | Bacteroidetes     | Bacteroides plebeius          |
| Sample_C13C.15 | C13C.M015 | 33                 | 2.56              | 112579            | 55823           | 269829          | 59.10           | 381.30         | 94.99                | 0.00             | Clostridiales     | N                    | N                      | Firmicutes        | Faecalibacterium prausnitzii  |
| Sample_C13B.16 | C13B.M016 | 289                | 1.75              | 8140              | 2948            | 39305           | 45.03           | 8.12           | 86.79                | 3.51             | Lactobacillales   | N                    | N                      | Firmicutes        | Weissella confusa             |
| Sample_T17B.1  | T17B.M001 | 36                 | 2.10              | 101634            | 26149           | 261351          | 38.66           | 12.27          | 99.60                | 0.00             | Selenomonadales   | N                    | N                      | Firmicutes        | Veillonella parvula           |
| Sample_T7A.43  | T7A.M043  | 26                 | 2.20              | 167522            | 38870           | 323919          | 36.43           | 108.06         | 99.32                | 0.34             | Clostridiales     | Y                    | N                      | Firmicutes        | uncultured Ruminococcus sp.   |
| Sample_T13A.19 | T13A.M019 | 37                 | 2.76              | 220081            | 46507           | 452427          | 42.95           | 32.08          | 98.63                | 0.00             | Clostridiales     | Y                    | N                      | Firmicutes        | uncultured Ruminococcus sp.   |
| Sample_T16B.17 | T16B.M017 | 81                 | 2.87              | 55659             | 16738           | 234096          | 44.58           | 31.78          | 100.00               | 0.00             | Clostridiales     | Y                    | N                      | Firmicutes        | uncultured Ruminococcus sp.   |
| Sample_C14C.35 | C14C.M035 | 124                | 3.01              | 59417             | 11600           | 189666          | 47.02           | 29.60          | 97.98                | 0.00             | Clostridiales     | Y                    | N                      | Firmicutes        | uncultured Ruminococcus sp.   |
| Sample_C12A.12 | C12A.M012 | 50                 | 3.08              | 167311            | 28601           | 516307          | 50.07           | 18.28          | 99.32                | 0.02             | Clostridiales     | Y                    | N                      | Firmicutes        | uncultured Ruminococcus sp.   |
| Sample_C14A.27 | C14A.M027 | 101                | 2.85              | 68237             | 13140           | 249870          | 37.19           | 18.27          | 98.65                | 0.67             | Clostridiales     | Y                    | N                      | Firmicutes        | uncultured Ruminococcus sp.   |
| Sample_T3B.31  | T3B.M031  | 59                 | 2.52              | 70899             | 21337           | 227234          | 41.75           | 17.24          | 99.41                | 0.00             | Lachnospiraceae   | Y                    | N                      | Firmicutes        | uncultured Ruminococcus sp.   |
| Sample_C10A.24 | C10A.M024 | 187                | 2.74              | 23643             | 6628            | 91830           | 44.77           | 10.31          | 96.97                | 0.89             | Clostridiales     | Y                    | N                      | Firmicutes        | uncultured Ruminococcus sp.   |
| Sample_T12A.51 | T12A.M051 | 180                | 2.35              | 18435             | 6500            | 83702           | 44.27           | 9.92           | 92.95                | 0.76             | Clostridiales     | Y                    | N                      | Firmicutes        | uncultured Ruminococcus sp.   |
| Sample_C10A.69 | C10A.M069 | 29                 | 2.65              | 132030            | 59434           | 239729          | 40.90           | 25.11          | 99.51                | 0.98             | Lachnospiraceae   | Y                    | N                      | Firmicutes        | uncultured Roseburia sp.      |
| Sample_T10A.33 | T10A.M033 | 178                | 2.69              | 22678             | 6585            | 177700          | 61.28           | 10.12          | 96.25                | 0.34             | Clostridiales     | Y                    | N                      | Firmicutes        | uncultured Oscillibacter sp.  |
| Sample_T7A.4   | T7A.M004  | 81                 | 3.59              | 95243             | 21431           | 227040          | 41.04           | 20.41          | 98.10                | 1.58             | Clostridiales     | Y                    | N                      | Firmicutes        | uncultured Lachnospira sp.    |
| Sample_C13A.30 | C13A.M030 | 63                 | 2.21              | 53956             | 19445           | 179456          | 61.12           | 13.40          | 97.98                | 2.01             | Clostridiales     | Y                    | N                      | Firmicutes        | uncultured Flavonifractor sp. |
| Sample_T2B.11  | T2B.M011  | 39                 | 2.51              | 85986             | 41896           | 341464          | 33.18           | 14.60          | 97.98                | 0.00             | Clostridiales     | Y                    | N                      | Firmicutes        | uncultured Eubacterium sp.    |
| Sample_T5B.31  | T5B.M031  | 165                | 3.28              | 27612             | 8869            | 125184          | 37.69           | 11.06          | 98.65                | 2.80             | Clostridiales     | Y                    | N                      | Firmicutes        | uncultured Eubacterium sp.    |
| Sample_T4C.40  | T4C.M040  | 165                | 3.05              | 27382             | 8606            | 96118           | 38.29           | 10.72          | 99.77                | 0.94             | Clostridiales     | Y                    | N                      | Firmicutes        | uncultured Eubacterium sp.    |
| Sample_C12B.24 | C12B.M024 | 17                 | 2.66              | 242945            | 74320           | 462388          | 41.37           | 53.32          | 99.32                | 0.00             | Clostridiales     | Y                    | N                      | Firmicutes        | uncultured Coprococcus sp.    |
| Sample_T6B.21  | T6B.M021  | 75                 | 2.62              | 72973             | 18294           | 153722          | 29.86           | 232.59         | 99.05                | 0.00             | Bacteria          | Y                    | N                      | Firmicutes        | uncultured Clostridium sp.    |
| Sample_C12A.16 | C12A.M016 | 95                 | 3.24              | 50214             | 17562           | 209903          | 46.12           | 19.49          | 98.93                | 1.55             | Lachnospiraceae   | Y                    | N                      | Firmicutes        | uncultured Clostridium sp.    |
| Sample_C10A.44 | C10A.M044 | 64                 | 2.99              | 65422             | 25064           | 149310          | 47.21           | 16.76          | 94.20                | 0.97             | Lachnospiraceae   | Y                    | N                      | Firmicutes        | uncultured Clostridium sp.    |
| Sample_C1C.21  | C1C.M021  | 47                 | 2.73              | 77873             | 32084           | 266997          | 48.86           | 16.68          | 96.93                | 0.19             | Lachnospiraceae   | Y                    | N                      | Firmicutes        | uncultured Clostridium sp.    |
| Sample_T11C.9  | T11C.M009 | 50                 | 2.91              | 113272            | 36733           | 359814          | 38.02           | 16.06          | 97.98                | 1.01             | Clostridiales     | Y                    | N                      | Firmicutes        | uncultured Clostridium sp.    |
| Sample_C4B.12  | C4B.M012  | 92                 | 3.28              | 52893             | 18975           | 194584          | 38.79           | 13.63          | 99.32                | 0.34             | Clostridiales     | Y                    | Y                      | Firmicutes        | uncultured Clostridium sp.    |
| Sample_T14A.41 | T14A.M041 | 105                | 2.77              | 40673             | 12430           | 128516          | 26.94           | 13.10          | 97.58                | 0.16             | Clostridiales     | Y                    | N                      | Firmicutes        | uncultured Clostridium sp.    |
| Sample_T3C.30  | T3C.M030  | 112                | 2.90              | 36822             | 15801           | 134651          | 49.21           | 11.12          | 98.73                | 0.89             | Clostridiales     | Y                    | N                      | Firmicutes        | uncultured Clostridium sp.    |
| Sample_C13B.14 | C13B.M014 | 172                | 2.96              | 30131             | 7858            | 83957           | 28.90           | 10.90          | 98.11                | 0.00             | Bacteria          | Y                    | N                      | Firmicutes        | uncultured Clostridium sp.    |
| Sample_C1C.5   | C1C.M005  | 101                | 2.75              | 38656             | 14135           | 181165          | 50.51           | 10.78          | 96.51                | 0.11             | Clostridiales     | Y                    | N                      | Firmicutes        | uncultured Clostridium sp.    |
| Sample_T4C.28  | T4C.M028  | 589                | 5.38              | 11977             | 4508            | 60010           | 50.16           | 8.09           | 89.86                | 1.90             | Clostridiales     | Y                    | N                      | Firmicutes        | uncultured Clostridium sp.    |
| Sample_C3A.5   | C3A.M005  | 368                | 2.25              | 7041              | 3231            | 27638           | 42.97           | 7.31           | 80.97                | 1.68             | Clostridiales     | Y                    | Y                      | Firmicutes        | uncultured Clostridium sp.    |



|                |           |     |      |        |       |        |       |        |        |      |                    |   |   |                |                                 |
|----------------|-----------|-----|------|--------|-------|--------|-------|--------|--------|------|--------------------|---|---|----------------|---------------------------------|
| Sample_C6B.13  | C6B.M013  | 496 | 2.75 | 6362   | 2789  | 55045  | 28.94 | 7.30   | 89.26  | 1.41 | Clostridiales      | Y | N | Firmicutes     | uncultured Clostridium sp.      |
| Sample_C11B.47 | C11B.M047 | 713 | 4.61 | 8154   | 3039  | 46847  | 52.17 | 8.39   | 88.97  | 1.46 | Enterobacteriaceae | Y | N | Proteobacteria | uncultured Citrobacter sp.      |
| Sample_C5B.2   | C5B.M002  | 63  | 2.63 | 69241  | 19543 | 262638 | 54.74 | 25.24  | 99.32  | 0.67 | Clostridiales      | Y | N | Firmicutes     | uncultured Butyrivicoccus sp.   |
| Sample_T17C.7  | T17C.M007 | 34  | 2.70 | 121062 | 42815 | 293346 | 42.44 | 33.86  | 99.36  | 0.00 | Clostridiales      | Y | Y | Firmicutes     | uncultured Blautia sp.          |
| Sample_T6B.40  | T6B.M040  | 69  | 2.62 | 52201  | 21199 | 150384 | 44.84 | 15.67  | 92.40  | 4.11 | Clostridiales      | Y | N | Firmicutes     | uncultured Blautia sp.          |
| Sample_T11A.23 | T11A.M023 | 50  | 2.89 | 99162  | 37087 | 176448 | 44.73 | 15.17  | 99.36  | 0.32 | Clostridiales      | Y | N | Firmicutes     | uncultured Blautia sp.          |
| Sample_T2A.58  | T2A.M058  | 90  | 2.68 | 42563  | 15196 | 116379 | 45.76 | 12.22  | 83.61  | 0.63 | Clostridiales      | Y | N | Firmicutes     | uncultured Blautia sp.          |
| Sample_C9A.35  | C9A.M035  | 259 | 3.04 | 14792  | 6175  | 41166  | 43.43 | 8.73   | 84.28  | 1.27 | Clostridiales      | Y | N | Firmicutes     | uncultured Blautia sp.          |
| Sample_C11C.18 | C11C.M018 | 110 | 4.73 | 65220  | 21580 | 296138 | 42.20 | 14.16  | 91.04  | 2.18 | Bacteroides        | Y | N | Bacteroidetes  | uncultured Bacteroides sp.      |
| Sample_C13A.9  | C13A.M009 | 67  | 2.59 | 101006 | 17380 | 195167 | 40.33 | 27.69  | 96.83  | 0.95 | Clostridiales      | N | N | Firmicutes     | Tyzzrella nexilis               |
| Sample_C5A.36  | C5A.M036  | 479 | 2.94 | 7419   | 3161  | 24506  | 38.58 | 7.25   | 86.79  | 2.58 | Bacteroidales      | N | N | Bacteroidetes  | Tannerella sp. AF04-6           |
| Sample_C11A.16 | C11A.M016 | 67  | 2.37 | 52598  | 19494 | 297847 | 62.54 | 28.32  | 98.13  | 0.62 | Proteobacteria     | N | N | Proteobacteria | Sutterella wadsworthensis       |
| Sample_C3B.28  | C3B.M028  | 45  | 2.84 | 100335 | 28051 | 408555 | 55.60 | 17.40  | 100.00 | 0.00 | Proteobacteria     | N | N | Proteobacteria | Sutterella wadsworthensis       |
| Sample_T13C.16 | T13C.M016 | 51  | 1.80 | 62301  | 15322 | 254451 | 47.07 | 12.39  | 98.02  | 1.88 | Proteobacteria     | N | N | Proteobacteria | Sutterella sp. CAG:521          |
| Sample_T4C.37  | T4C.M037  | 37  | 2.48 | 101349 | 32337 | 224581 | 57.17 | 26.88  | 98.12  | 0.00 | Proteobacteria     | N | N | Proteobacteria | Sutterella sp. AM18-8-1         |
| Sample_C10A.31 | C10A.M031 | 24  | 2.19 | 178214 | 45599 | 424273 | 55.63 | 29.31  | 98.75  | 0.63 | Proteobacteria     | N | N | Proteobacteria | Sutterella sp. AM11-39          |
| Sample_C7C.7   | C7C.M007  | 34  | 2.33 | 132096 | 29758 | 531694 | 54.31 | 14.82  | 98.75  | 0.63 | Proteobacteria     | N | N | Proteobacteria | Sutterella sp. AM11-39          |
| Sample_T17C.8  | T17C.M008 | 84  | 2.41 | 57601  | 13135 | 195610 | 62.01 | 14.57  | 96.89  | 0.62 | Proteobacteria     | N | N | Proteobacteria | Sutterella megalosphaeroides    |
| Sample_T4A.11  | T4A.M011  | 75  | 2.36 | 47834  | 13763 | 132133 | 58.67 | 41.55  | 96.09  | 0.34 | Clostridiales      | N | N | Firmicutes     | Subdoligranulum variabile       |
| Sample_C7A.17  | C7A.M017  | 94  | 2.51 | 37201  | 14835 | 107565 | 59.09 | 21.15  | 95.59  | 0.79 | Clostridiales      | N | N | Firmicutes     | Subdoligranulum sp. 60_17       |
| Sample_C3C.6   | C3C.M006  | 68  | 2.23 | 53423  | 16938 | 213423 | 58.62 | 18.51  | 94.47  | 0.00 | Clostridiales      | N | Y | Firmicutes     | Subdoligranulum sp. 60_17       |
| Sample_T3A.12  | T3A.M012  | 79  | 1.96 | 39875  | 12081 | 139498 | 39.89 | 11.33  | 98.74  | 2.07 | Streptococcus      | N | N | Firmicutes     | Streptococcus salivarius        |
| Sample_C13C.6  | C13C.M006 | 25  | 2.08 | 156572 | 28656 | 400021 | 37.29 | 29.62  | 100.00 | 0.00 | Lactobacillales    | N | N | Firmicutes     | Streptococcus pasteurianus      |
| Sample_T15A.38 | T15A.M038 | 60  | 2.03 | 52838  | 20118 | 190562 | 55.14 | 12.00  | 98.83  | 0.16 | Firmicutes         | N | N | Firmicutes     | Schwartzia succinivorans        |
| Sample_T8C.28  | T8C.M028  | 128 | 3.22 | 43205  | 13738 | 144565 | 58.32 | 15.39  | 97.95  | 0.00 | Clostridiales      | N | N | Firmicutes     | Ruthenibacterium lactatiformans |
| Sample_T18A.13 | T18A.M013 | 37  | 2.31 | 161290 | 39265 | 245527 | 49.40 | 73.85  | 97.98  | 0.00 | Clostridiales      | N | N | Firmicutes     | Ruminococcus sp. OM06-36AC      |
| Sample_T6C.36  | T6C.M036  | 39  | 2.64 | 116251 | 35943 | 331684 | 51.46 | 22.95  | 98.65  | 0.04 | Clostridiales      | N | N | Firmicutes     | Ruminococcus sp. OM06-36AC      |
| Sample_C8C.18  | C8C.M018  | 138 | 2.79 | 35735  | 7913  | 141347 | 45.92 | 9.37   | 94.94  | 1.75 | Lachnospiraceae    | N | N | Firmicutes     | Ruminococcus sp. DSM 100440     |
| Sample_T2C.29  | T2C.M029  | 33  | 2.36 | 152272 | 33025 | 277649 | 49.96 | 12.23  | 96.64  | 0.00 | Clostridiales      | N | N | Firmicutes     | Ruminococcus sp. CAG:579        |
| Sample_C2C.8   | C2C.M008  | 319 | 2.01 | 7674   | 3265  | 31292  | 44.37 | 7.29   | 85.06  | 0.84 | Clostridiales      | N | N | Firmicutes     | Ruminococcus sp. CAG:563        |
| Sample_C4C.48  | C4C.M048  | 63  | 2.71 | 67630  | 21158 | 184824 | 41.07 | 17.25  | 97.36  | 0.00 | Lachnospiraceae    | N | N | Firmicutes     | Ruminococcus sp. CAG:55         |
| Sample_T12A.31 | T12A.M031 | 25  | 2.25 | 141199 | 42529 | 276095 | 44.61 | 45.04  | 97.09  | 0.00 | Clostridiales      | N | N | Firmicutes     | Ruminococcus sp. CAG:488        |
| Sample_C4A.17  | C4A.M017  | 12  | 2.12 | 257602 | 84265 | 368588 | 45.64 | 20.13  | 97.98  | 0.00 | Clostridiales      | N | N | Firmicutes     | Ruminococcus sp. CAG:403        |
| Sample_T17B.18 | T17B.M018 | 249 | 3.94 | 25248  | 7372  | 138219 | 40.91 | 124.03 | 96.04  | 0.63 | Clostridiales      | N | N | Firmicutes     | Ruminococcus sp. AF37-6AT       |
| Sample_T4A.26  | T4A.M026  | 95  | 2.58 | 89624  | 9848  | 223006 | 45.93 | 21.70  | 98.65  | 0.00 | Clostridiales      | Y | N | Firmicutes     | Ruminococcus sp.                |
| Sample_T12A.9  | T12A.M009 | 215 | 2.13 | 13851  | 4530  | 62659  | 39.91 | 18.62  | 93.95  | 0.84 | Clostridiales      | Y | Y | Firmicutes     | Ruminococcus sp.                |
| Sample_C10B.23 | C10B.M023 | 100 | 2.43 | 39510  | 11797 | 108380 | 42.99 | 17.11  | 98.24  | 0.00 | Lachnospiraceae    | N | N | Firmicutes     | Ruminococcus lactaris           |
| Sample_C1A.16  | C1A.M016  | 199 | 2.82 | 24762  | 7110  | 105248 | 50.07 | 20.47  | 97.98  | 0.00 | Clostridiales      | N | N | Firmicutes     | Ruminococcus callidus           |
| Sample_C10B.18 | C10B.M018 | 32  | 2.20 | 176404 | 40321 | 316548 | 40.78 | 62.61  | 99.32  | 0.67 | Clostridiales      | N | N | Firmicutes     | Ruminococcus bromii             |

|                |           |     |      |        |       |        |       |        |        |      |                 |   |   |                |                                     |
|----------------|-----------|-----|------|--------|-------|--------|-------|--------|--------|------|-----------------|---|---|----------------|-------------------------------------|
| Sample_T15C.29 | T15C.M029 | 42  | 2.33 | 141324 | 27922 | 417654 | 40.36 | 34.58  | 99.32  | 0.00 | Clostridiales   | N | N | Firmicutes     | Ruminococcus bromii                 |
| Sample_C12A.29 | C12A.M029 | 23  | 1.93 | 136649 | 65005 | 355211 | 42.40 | 127.72 | 95.30  | 0.00 | Clostridiales   | N | Y | Firmicutes     | Ruminococcaceae bacterium           |
| Sample_C12C.35 | C12C.M035 | 27  | 2.27 | 182355 | 49949 | 340424 | 51.71 | 37.40  | 97.27  | 0.00 | Clostridiales   | N | N | Firmicutes     | Ruminococcaceae bacterium           |
| Sample_C13A.16 | C13A.M016 | 14  | 1.91 | 207808 | 77316 | 489148 | 44.34 | 25.24  | 97.98  | 0.34 | Clostridiales   | N | N | Firmicutes     | Ruminococcaceae bacterium           |
| Sample_T5C.2   | T5C.M002  | 15  | 2.19 | 277424 | 67732 | 534224 | 51.27 | 23.79  | 97.27  | 0.00 | Clostridiales   | N | N | Firmicutes     | Ruminococcaceae bacterium           |
| Sample_T11A.47 | T11A.M047 | 45  | 2.60 | 172794 | 49441 | 468770 | 53.12 | 21.19  | 98.65  | 0.00 | Clostridiales   | N | N | Firmicutes     | Ruminococcaceae bacterium           |
| Sample_C10A.45 | C10A.M045 | 276 | 2.48 | 13041  | 4130  | 35358  | 56.47 | 20.03  | 97.61  | 0.00 | Clostridiales   | N | N | Firmicutes     | Ruminococcaceae bacterium           |
| Sample_T12A.57 | T12A.M057 | 68  | 2.24 | 62187  | 15704 | 301645 | 45.93 | 16.52  | 94.63  | 2.01 | Clostridiales   | N | N | Firmicutes     | Ruminococcaceae bacterium           |
| Sample_C12C.59 | C12C.M059 | 55  | 2.02 | 60856  | 16094 | 187032 | 56.82 | 16.35  | 88.36  | 0.00 | Clostridiales   | N | Y | Firmicutes     | Ruminococcaceae bacterium           |
| Sample_C12A.27 | C12A.M027 | 117 | 2.35 | 34404  | 8844  | 111372 | 46.29 | 13.72  | 95.07  | 1.34 | Clostridiales   | N | N | Firmicutes     | Ruminococcaceae bacterium           |
| Sample_C2A.64  | C2A.M064  | 120 | 2.30 | 26695  | 9338  | 100460 | 51.81 | 11.68  | 97.76  | 1.36 | Clostridiales   | N | N | Firmicutes     | Ruminococcaceae bacterium           |
| Sample_T16C.24 | T16C.M024 | 142 | 2.19 | 22094  | 7207  | 102418 | 38.97 | 10.27  | 99.32  | 0.34 | Clostridiales   | N | N | Firmicutes     | Ruminococcaceae bacterium           |
| Sample_C2A.11  | C2A.M011  | 216 | 2.03 | 12413  | 4816  | 44837  | 53.31 | 8.98   | 87.05  | 0.67 | Clostridiales   | N | N | Firmicutes     | Ruminococcaceae bacterium           |
| Sample_T3B.29  | T3B.M029  | 465 | 2.65 | 6748   | 2936  | 32701  | 60.62 | 7.08   | 84.33  | 0.67 | Clostridiales   | N | N | Firmicutes     | Ruminococcaceae bacterium           |
| Sample_T6B.35  | T6B.M035  | 384 | 2.68 | 8453   | 3547  | 27033  | 42.85 | 7.89   | 84.49  | 3.16 | Lachnospiraceae | N | N | Firmicutes     | Roseburia sp. OM02-15               |
| Sample_T15A.12 | T15A.M012 | 79  | 3.50 | 76830  | 22249 | 215668 | 41.75 | 46.25  | 99.03  | 2.13 | Lachnospiraceae | N | N | Firmicutes     | Roseburia sp. OF03-24               |
| Sample_T16C.31 | T16C.M031 | 49  | 2.74 | 109168 | 28805 | 287542 | 40.77 | 24.40  | 98.43  | 1.34 | Clostridiales   | N | N | Firmicutes     | Roseburia sp. CAG:303               |
| Sample_C5A.5   | C5A.M005  | 41  | 2.56 | 96032  | 29497 | 220505 | 44.95 | 24.01  | 94.92  | 0.00 | Lachnospiraceae | N | N | Firmicutes     | Roseburia sp. CAG:197               |
| Sample_T15A.15 | T15A.M015 | 41  | 2.38 | 92026  | 31369 | 165523 | 45.25 | 13.65  | 96.61  | 1.69 | Lachnospiraceae | N | N | Firmicutes     | Roseburia sp. AM16-25               |
| Sample_T8B.32  | T8B.M032  | 383 | 2.21 | 6809   | 2938  | 29806  | 40.11 | 7.04   | 81.99  | 2.48 | Lachnospiraceae | N | N | Firmicutes     | Roseburia sp. 1XD42-69              |
| Sample_T13B.55 | T13B.M055 | 289 | 2.38 | 10041  | 4408  | 41270  | 48.44 | 8.24   | 83.27  | 0.48 | Lachnospiraceae | Y | Y | Firmicutes     | Roseburia sp.                       |
| Sample_T7C.18  | T7C.M018  | 152 | 3.79 | 40424  | 10391 | 265450 | 40.96 | 13.60  | 98.55  | 0.39 | Lachnospiraceae | N | N | Firmicutes     | Roseburia inulinivorans             |
| Sample_T8A.37  | T8A.M037  | 52  | 3.44 | 101680 | 36706 | 235638 | 42.81 | 34.79  | 99.03  | 0.36 | Lachnospiraceae | N | N | Firmicutes     | Roseburia intestinalis              |
| Sample_C14B.22 | C14B.M022 | 40  | 2.99 | 118368 | 37887 | 438640 | 49.59 | 34.72  | 99.44  | 0.24 | Lachnospiraceae | N | N | Firmicutes     | Roseburia hominis                   |
| Sample_C12B.22 | C12B.M022 | 50  | 3.10 | 127928 | 28378 | 357364 | 43.35 | 33.03  | 99.21  | 0.97 | Lachnospiraceae | N | N | Firmicutes     | Roseburia faecis                    |
| Sample_C6B.21  | C6B.M021  | 116 | 2.85 | 36022  | 12578 | 183190 | 27.05 | 25.57  | 82.75  | 0.00 | Bacteria        | N | N | Firmicutes     | Romboutsia ilealis                  |
| Sample_T18A.16 | T18A.M016 | 90  | 2.32 | 43182  | 11436 | 276326 | 48.94 | 21.01  | 100.00 | 0.00 | Proteobacteria  | N | N | Proteobacteria | Proteobacteria bacterium CAG:139    |
| Sample_T12A.11 | T12A.M011 | 53  | 2.60 | 86404  | 20528 | 201953 | 48.24 | 13.68  | 95.94  | 0.74 | Bacteroidales   | N | Y | Bacteroidetes  | Prevotellaceae bacterium            |
| Sample_C13B.31 | C13B.M031 | 96  | 2.76 | 45235  | 13450 | 93157  | 49.45 | 20.96  | 99.25  | 0.12 | Bacteroidales   | N | N | Bacteroidetes  | Prevotella stercorea                |
| Sample_T4A.6   | T4A.M006  | 100 | 3.33 | 55284  | 19133 | 243442 | 46.40 | 72.55  | 93.07  | 0.34 | Prevotella      | N | N | Bacteroidetes  | Prevotella sp. TF12-30              |
| Sample_C11B.52 | C11B.M052 | 170 | 2.67 | 23211  | 7424  | 67133  | 47.60 | 15.67  | 96.34  | 0.74 | Bacteroidales   | N | N | Bacteroidetes  | Prevotella sp. CAG:891              |
| Sample_T7A.34  | T7A.M034  | 76  | 2.86 | 60381  | 20206 | 170871 | 50.46 | 91.07  | 99.25  | 0.00 | Bacteroidales   | N | N | Bacteroidetes  | Prevotella sp. CAG:520              |
| Sample_T2B.23  | T2B.M023  | 81  | 3.51 | 66098  | 22916 | 266137 | 45.60 | 34.13  | 99.25  | 0.23 | Bacteroidales   | N | N | Bacteroidetes  | Prevotella sp. CAG:255              |
| Sample_C1B.4   | C1B.M004  | 73  | 2.47 | 54163  | 18714 | 194302 | 54.13 | 69.79  | 98.86  | 0.00 | Bacteroidales   | N | N | Bacteroidetes  | Prevotella sp. CAG:1031             |
| Sample_T15B.1  | T15B.M001 | 90  | 2.52 | 40109  | 13674 | 145438 | 47.18 | 116.20 | 81.89  | 1.72 | Bacteria        | Y | Y | Bacteroidetes  | Prevotella sp.                      |
| Sample_C6A.32  | C6A.M032  | 62  | 3.44 | 98662  | 26260 | 232030 | 50.90 | 66.26  | 99.32  | 1.13 | Prevotella      | Y | Y | Bacteroidetes  | Prevotella sp.                      |
| Sample_C11B.20 | C11B.M020 | 127 | 2.95 | 36760  | 10953 | 165045 | 45.93 | 134.97 | 97.12  | 0.84 | Prevotella      | N | N | Bacteroidetes  | Prevotella copri                    |
| Sample_C7B.12  | C7B.M012  | 46  | 2.52 | 94240  | 25143 | 278358 | 49.90 | 31.72  | 98.30  | 0.00 | Bacteroidales   | N | N | Bacteroidetes  | Porphyromonadaceae bacterium        |
| Sample_T17C.17 | T17C.M017 | 21  | 1.89 | 148145 | 66279 | 263476 | 42.26 | 18.28  | 100.00 | 1.10 | Selenomonadales | N | N | Firmicutes     | Phascolarctobacterium succinatutens |

|                |           |     |      |        |       |        |       |        |        |      |                 |   |   |               |                                     |
|----------------|-----------|-----|------|--------|-------|--------|-------|--------|--------|------|-----------------|---|---|---------------|-------------------------------------|
| Sample_T8B.36  | T8B.M036  | 39  | 2.37 | 116219 | 36745 | 249725 | 46.70 | 15.13  | 99.40  | 0.80 | Selenomonadales | N | N | Firmicutes    | Phascolarctobacterium succinatutens |
| Sample_T5A.12  | T5A.M012  | 24  | 1.89 | 134885 | 53443 | 265958 | 45.61 | 26.02  | 99.38  | 0.60 | Selenomonadales | N | N | Firmicutes    | Phascolarctobacterium sp. CAG:266   |
| Sample_C13B.9  | C13B.M009 | 101 | 2.43 | 47797  | 15191 | 255470 | 43.90 | 13.78  | 99.80  | 1.35 | Selenomonadales | N | N | Firmicutes    | Phascolarctobacterium faecium       |
| Sample_T5A.21  | T5A.M021  | 41  | 3.54 | 116502 | 52599 | 244031 | 48.66 | 56.02  | 99.13  | 0.00 | Bacteroidales   | N | N | Bacteroidetes | Paraprevotella xylaniphila          |
| Sample_T2C.19  | T2C.M019  | 71  | 4.40 | 131692 | 39063 | 403550 | 48.23 | 23.34  | 99.25  | 0.19 | Bacteroidales   | N | N | Bacteroidetes | Paraprevotella clara                |
| Sample_T3B.32  | T3B.M032  | 44  | 4.19 | 147520 | 50621 | 280618 | 45.45 | 34.90  | 99.61  | 0.00 | Bacteroidales   | N | N | Bacteroidetes | Parabacteroides merdae              |
| Sample_T5A.7   | T5A.M007  | 46  | 4.15 | 118853 | 54386 | 333251 | 45.31 | 31.77  | 99.23  | 0.00 | Bacteroidales   | N | N | Bacteroidetes | Parabacteroides johnsonii CAG:246   |
| Sample_C5A.66  | C5A.M066  | 60  | 4.72 | 163417 | 41458 | 367268 | 45.09 | 14.41  | 99.42  | 0.00 | Bacteroidales   | N | N | Bacteroidetes | Parabacteroides distasonis          |
| Sample_T5C.49  | T5C.M049  | 88  | 2.33 | 51061  | 14983 | 116295 | 57.63 | 18.32  | 97.55  | 0.17 | Clostridiales   | N | N | Firmicutes    | Oscillibacter sp. 57_20             |
| Sample_C12C.53 | C12C.M053 | 73  | 2.30 | 51713  | 17859 | 169143 | 57.50 | 15.01  | 91.96  | 3.69 | Clostridiales   | N | Y | Firmicutes    | Oscillibacter sp. 57_20             |
| Sample_T4C.10  | T4C.M010  | 58  | 2.96 | 100009 | 21474 | 323815 | 57.23 | 83.65  | 98.65  | 0.00 | Clostridiales   | Y | N | Firmicutes    | Oscillibacter sp.                   |
| Sample_T8C.37  | T8C.M037  | 46  | 1.92 | 87990  | 19924 | 158486 | 61.86 | 76.23  | 92.44  | 1.01 | Clostridiales   | Y | N | Firmicutes    | Oscillibacter sp.                   |
| Sample_C3A.1   | C3A.M001  | 64  | 2.08 | 41323  | 15890 | 141869 | 59.29 | 72.32  | 84.94  | 1.90 | Clostridiales   | Y | Y | Firmicutes    | Oscillibacter sp.                   |
| Sample_T12A.61 | T12A.M061 | 84  | 2.15 | 39498  | 12237 | 130644 | 59.31 | 39.17  | 89.93  | 1.68 | Clostridiales   | Y | N | Firmicutes    | Oscillibacter sp.                   |
| Sample_C3A.22  | C3A.M022  | 64  | 1.53 | 33425  | 13553 | 131844 | 58.68 | 25.64  | 83.26  | 1.34 | Clostridiales   | Y | N | Firmicutes    | Oscillibacter sp.                   |
| Sample_C7A.14  | C7A.M014  | 26  | 2.03 | 109975 | 50403 | 283358 | 56.99 | 24.98  | 89.93  | 2.07 | Clostridiales   | Y | Y | Firmicutes    | Oscillibacter sp.                   |
| Sample_T5C.44  | T5C.M044  | 94  | 1.80 | 33177  | 9492  | 73457  | 62.03 | 24.71  | 84.11  | 1.06 | Clostridiales   | Y | Y | Firmicutes    | Oscillibacter sp.                   |
| Sample_T10A.19 | T10A.M019 | 17  | 1.84 | 151401 | 50874 | 238042 | 58.28 | 18.47  | 94.29  | 0.67 | Clostridiales   | Y | N | Firmicutes    | Oscillibacter sp.                   |
| Sample_T14A.30 | T14A.M030 | 118 | 1.80 | 22729  | 7645  | 70039  | 59.87 | 12.64  | 92.57  | 2.01 | Clostridiales   | Y | N | Firmicutes    | Oscillibacter sp.                   |
| Sample_T15C.31 | T15C.M031 | 185 | 1.72 | 12089  | 5055  | 40664  | 59.86 | 10.73  | 80.80  | 0.67 | Clostridiales   | Y | Y | Firmicutes    | Oscillibacter sp.                   |
| Sample_C1C.50  | C1C.M050  | 142 | 1.59 | 15037  | 5662  | 59402  | 61.49 | 8.94   | 81.40  | 2.35 | Clostridiales   | Y | N | Firmicutes    | Oscillibacter sp.                   |
| Sample_T4C.11  | T4C.M011  | 238 | 1.99 | 12130  | 3765  | 42045  | 62.70 | 8.93   | 92.59  | 2.54 | Clostridiales   | Y | N | Firmicutes    | Oscillibacter sp.                   |
| Sample_T11A.22 | T11A.M022 | 106 | 4.08 | 65415  | 19806 | 126893 | 43.27 | 11.65  | 99.01  | 0.00 | Bacteria        | N | N | Bacteroidetes | Odoribacter splanchnicus            |
| Sample_T7A.7   | T7A.M007  | 24  | 1.49 | 153635 | 48335 | 272397 | 27.18 | 49.46  | 92.13  | 1.85 | Bacteria        | N | N | Tenericutes   | Mycoplasma sp. CAG:956              |
| Sample_C4C.51  | C4C.M051  | 58  | 1.10 | 27087  | 8395  | 78168  | 27.28 | 9.43   | 82.66  | 1.33 | Bacteria        | N | N | Tenericutes   | Mycoplasma sp. CAG:877              |
| Sample_C10A.59 | C10A.M059 | 35  | 1.47 | 95265  | 20787 | 205564 | 25.33 | 26.06  | 92.41  | 3.37 | Bacteria        | N | N | Tenericutes   | Mycoplasma sp. CAG:472              |
| Sample_C12A.28 | C12A.M028 | 19  | 1.75 | 129382 | 49753 | 426231 | 31.09 | 19.67  | 100.00 | 0.00 | Euryarchaeota   | N | N | Euryarchaeota | Methanobrevibacter smithii CAG:186  |
| Sample_C2C.12  | C2C.M012  | 369 | 2.12 | 6952   | 2975  | 24054  | 53.65 | 7.41   | 87.68  | 1.50 | Selenomonadales | N | N | Firmicutes    | Megasphaera sp. NM10                |
| Sample_C13B.20 | C13B.M020 | 45  | 2.47 | 91267  | 40989 | 166113 | 31.38 | 79.08  | 100.00 | 0.63 | Firmicutes      | N | N | Firmicutes    | Megamonas funiformis                |
| Sample_T13B.20 | T13B.M020 | 38  | 1.99 | 117472 | 28778 | 333451 | 32.65 | 110.71 | 99.47  | 1.57 | Lactobacillales | N | N | Firmicutes    | Lactobacillus salivarius            |
| Sample_C3B.25  | C3B.M025  | 50  | 2.15 | 62987  | 26701 | 211369 | 43.72 | 49.40  | 98.95  | 0.00 | Lactobacillales | N | N | Firmicutes    | Lactobacillus ruminis               |
| Sample_T4C.8   | T4C.M008  | 19  | 2.08 | 192022 | 69510 | 467734 | 46.74 | 39.55  | 99.18  | 0.00 | Lactobacillales | N | N | Firmicutes    | Lactobacillus mucosae               |
| Sample_T13A.25 | T13A.M025 | 112 | 2.09 | 36169  | 7776  | 124938 | 36.69 | 10.59  | 99.02  | 0.13 | Lactobacillus   | N | N | Firmicutes    | Lactobacillus crispatus             |
| Sample_T17C.10 | T17C.M010 | 88  | 1.99 | 47844  | 9888  | 120234 | 38.08 | 34.86  | 98.94  | 0.00 | Lactobacillus   | N | N | Firmicutes    | Lactobacillus amylovorus            |
| Sample_T4C.1   | T4C.M001  | 71  | 1.93 | 44927  | 12896 | 205435 | 34.79 | 10.41  | 98.83  | 0.00 | Lactobacillus   | N | N | Firmicutes    | Lactobacillus acidophilus           |
| Sample_C14A.16 | C14A.M016 | 220 | 2.76 | 20690  | 5747  | 61780  | 46.69 | 10.76  | 91.79  | 0.00 | Clostridiales   | N | N | Firmicutes    | Lachnospiraceae bacterium AM48-27BH |
| Sample_T17B.5  | T17B.M005 | 65  | 2.54 | 49699  | 20407 | 153936 | 38.70 | 12.65  | 97.53  | 0.00 | Clostridiales   | N | N | Firmicutes    | Lachnospiraceae bacterium AM25-39   |
| Sample_T5B.7   | T5B.M007  | 63  | 2.78 | 79073  | 24320 | 207089 | 42.10 | 49.31  | 98.65  | 0.00 | Clostridiales   | N | N | Firmicutes    | Lachnospiraceae bacterium           |
| Sample_C10A.50 | C10A.M050 | 43  | 2.76 | 89697  | 35964 | 157507 | 43.99 | 24.84  | 98.55  | 2.17 | Lachnospiraceae | N | N | Firmicutes    | Lachnospiraceae bacterium           |

|                |           |     |      |        |        |        |       |        |        |      |                    |   |   |                |                                    |
|----------------|-----------|-----|------|--------|--------|--------|-------|--------|--------|------|--------------------|---|---|----------------|------------------------------------|
| Sample_C4A.36  | C4A.M036  | 52  | 2.75 | 117998 | 24986  | 363828 | 40.56 | 20.40  | 98.65  | 0.00 | Clostridiales      | N | N | Firmicutes     | Lachnospiraceae bacterium          |
| Sample_C3B.23  | C3B.M023  | 21  | 2.62 | 204619 | 86003  | 366618 | 44.46 | 15.20  | 98.65  | 0.00 | Clostridiales      | N | N | Firmicutes     | Lachnospiraceae bacterium          |
| Sample_T2C.47  | T2C.M047  | 103 | 3.22 | 58463  | 12592  | 171887 | 41.47 | 12.02  | 94.42  | 1.63 | Lachnospiraceae    | N | N | Firmicutes     | Lachnospiraceae bacterium          |
| Sample_C8C.2   | C8C.M002  | 80  | 2.91 | 53069  | 17467  | 157446 | 46.19 | 11.29  | 97.98  | 0.34 | Clostridiales      | N | N | Firmicutes     | Lachnospiraceae bacterium          |
| Sample_C10A.40 | C10A.M040 | 99  | 1.97 | 27884  | 9390   | 111638 | 41.96 | 9.97   | 89.43  | 1.20 | Lachnospiraceae    | N | N | Firmicutes     | Lachnospiraceae bacterium          |
| Sample_T12A.7  | T12A.M007 | 227 | 2.90 | 18549  | 6000   | 56413  | 44.14 | 9.51   | 94.92  | 2.28 | Lachnospiraceae    | N | N | Firmicutes     | Lachnospiraceae bacterium          |
| Sample_T16A.22 | T16A.M022 | 80  | 5.47 | 158708 | 29467  | 378321 | 57.34 | 44.09  | 100.00 | 0.41 | Enterobacteriaceae | N | N | Proteobacteria | Klebsiella pneumoniae              |
| Sample_T8C.29  | T8C.M029  | 104 | 6.46 | 89667  | 32618  | 265203 | 49.21 | 18.66  | 99.34  | 2.06 | Clostridiales      | N | N | Firmicutes     | Hungatella hathewayi               |
| Sample_T2A.57  | T2A.M057  | 55  | 2.18 | 63660  | 25021  | 179384 | 33.50 | 16.00  | 97.30  | 0.84 | Bacteria           | N | N | Firmicutes     | Holdemanella biformis              |
| Sample_T3A.32  | T3A.M032  | 230 | 1.92 | 11154  | 3935   | 43762  | 39.53 | 14.30  | 94.57  | 2.94 | Pasteurellaceae    | N | N | Proteobacteria | Haemophilus parainfluenzae         |
| Sample_T3B.10  | T3B.M010  | 87  | 3.28 | 95887  | 16796  | 292219 | 58.16 | 37.85  | 97.27  | 0.00 | Clostridiales      | N | N | Firmicutes     | Gemmiger fornicilis                |
| Sample_C11A.36 | C11A.M036 | 97  | 2.60 | 51266  | 12688  | 166748 | 29.35 | 160.74 | 98.87  | 2.25 | Bacteria           | N | N | Fusobacteria   | Fusobacterium varium               |
| Sample_C11A.15 | C11A.M015 | 228 | 2.02 | 12559  | 3770   | 87691  | 30.39 | 9.43   | 97.19  | 1.12 | Bacteria           | N | N | Fusobacteria   | Fusobacterium varium               |
| Sample_C13A.34 | C13A.M034 | 173 | 3.32 | 34869  | 8772   | 110675 | 30.53 | 13.95  | 97.75  | 2.81 | Bacteria           | N | N | Fusobacteria   | Fusobacterium ulcerans             |
| Sample_C13B.11 | C13B.M011 | 52  | 2.08 | 86678  | 18834  | 167319 | 28.34 | 64.35  | 98.87  | 1.12 | Bacteria           | N | N | Fusobacteria   | Fusobacterium mortiferum           |
| Sample_T17B.17 | T17B.M017 | 364 | 1.86 | 5952   | 2597   | 34608  | 29.29 | 7.08   | 83.14  | 0.00 | Bacteria           | N | N | Fusobacteria   | Fusobacterium mortiferum           |
| Sample_T3A.23  | T3A.M023  | 36  | 3.02 | 147742 | 43626  | 371484 | 48.07 | 22.79  | 98.94  | 0.63 | Clostridiales      | N | N | Firmicutes     | Fusicatenibacter saccharivorans    |
| Sample_T8C.18  | T8C.M018  | 71  | 2.33 | 48590  | 15997  | 113657 | 63.70 | 12.66  | 96.59  | 0.86 | Clostridiales      | N | N | Firmicutes     | Fournierella massiliensis          |
| Sample_C8B.35  | C8B.M035  | 127 | 2.33 | 28047  | 8559   | 172333 | 61.50 | 10.48  | 98.32  | 3.60 | Clostridiales      | N | Y | Firmicutes     | Flavonifractor sp. An100           |
| Sample_C13C.26 | C13C.M026 | 173 | 1.97 | 15115  | 5280   | 54105  | 61.24 | 8.79   | 93.93  | 0.89 | Clostridiales      | N | N | Firmicutes     | Flavonifractor sp. An100           |
| Sample_T11C.29 | T11C.M029 | 95  | 2.77 | 45956  | 13522  | 138539 | 62.73 | 12.14  | 89.03  | 0.13 | Clostridiales      | N | N | Firmicutes     | Flavonifractor plautii             |
| Sample_T2A.21  | T2A.M021  | 56  | 3.04 | 84292  | 26671  | 207728 | 43.65 | 22.10  | 99.77  | 0.00 | Clostridiales      | N | N | Firmicutes     | Firmicutes bacterium CAG:882       |
| Sample_T4C.19  | T4C.M019  | 31  | 1.99 | 95126  | 38884  | 243023 | 60.02 | 24.30  | 92.61  | 0.67 | Clostridiales      | N | N | Firmicutes     | Firmicutes bacterium CAG:83        |
| Sample_T16C.38 | T16C.M038 | 40  | 1.19 | 59058  | 14113  | 235357 | 26.63 | 40.94  | 93.82  | 0.00 | Bacteria           | N | N | Firmicutes     | Firmicutes bacterium CAG:822       |
| Sample_T4B.54  | T4B.M054  | 86  | 1.35 | 25538  | 7287   | 77170  | 43.02 | 9.11   | 94.15  | 0.88 | Clostridia         | N | N | Firmicutes     | Firmicutes bacterium CAG:552_39_19 |
| Sample_C2B.25  | C2B.M025  | 22  | 1.37 | 145242 | 48937  | 591300 | 25.92 | 21.52  | 91.57  | 2.57 | Bacteria           | N | Y | Firmicutes     | Firmicutes bacterium CAG:460       |
| Sample_T4B.45  | T4B.M045  | 31  | 1.08 | 70093  | 16552  | 183188 | 26.35 | 15.19  | 84.65  | 2.64 | Bacteria           | N | N | Firmicutes     | Firmicutes bacterium CAG:460       |
| Sample_T12A.38 | T12A.M038 | 65  | 1.04 | 23405  | 7063   | 82128  | 26.79 | 9.58   | 84.83  | 0.56 | Bacteria           | N | N | Firmicutes     | Firmicutes bacterium CAG:460       |
| Sample_C8B.25  | C8B.M025  | 30  | 2.11 | 197919 | 55808  | 518489 | 36.49 | 52.11  | 98.65  | 0.00 | Clostridiales      | N | N | Firmicutes     | Firmicutes bacterium CAG:341       |
| Sample_C12C.60 | C12C.M060 | 38  | 1.35 | 55965  | 21308  | 187304 | 26.00 | 21.59  | 92.00  | 1.33 | Bacteria           | N | N | Firmicutes     | Firmicutes bacterium CAG:321       |
| Sample_T2B.26  | T2B.M026  | 14  | 1.15 | 301840 | 138245 | 367674 | 26.64 | 18.40  | 93.53  | 0.00 | Bacteria           | N | N | Firmicutes     | Firmicutes bacterium CAG:321       |
| Sample_C2C.14  | C2C.M014  | 18  | 1.56 | 107210 | 42589  | 258160 | 29.34 | 31.85  | 100.00 | 0.11 | Bacteria           | N | N | Firmicutes     | Firmicutes bacterium CAG:313       |
| Sample_T4B.47  | T4B.M047  | 195 | 1.87 | 13444  | 4661   | 71437  | 53.80 | 8.56   | 88.25  | 0.67 | Clostridiales      | N | N | Firmicutes     | Firmicutes bacterium CAG:24053_14  |
| Sample_T8C.26  | T8C.M026  | 42  | 2.20 | 85900  | 28274  | 205527 | 61.50 | 24.88  | 91.94  | 1.01 | Clostridiales      | N | N | Firmicutes     | Firmicutes bacterium CAG:176_63_11 |
| Sample_C11B.11 | C11B.M011 | 121 | 1.81 | 21589  | 7845   | 64477  | 62.34 | 10.15  | 90.51  | 0.67 | Clostridiales      | N | N | Firmicutes     | Firmicutes bacterium CAG:176_63_11 |
| Sample_C8C.31  | C8C.M031  | 31  | 1.95 | 106454 | 31837  | 296203 | 60.33 | 17.66  | 91.94  | 0.00 | Clostridiales      | N | N | Firmicutes     | Firmicutes bacterium CAG:176       |
| Sample_C12B.1  | C12B.M001 | 57  | 2.11 | 64492  | 18057  | 120936 | 59.39 | 16.02  | 93.12  | 2.56 | Clostridiales      | N | N | Firmicutes     | Firmicutes bacterium CAG:170       |
| Sample_C3A.58  | C3A.M058  | 37  | 1.50 | 59677  | 25331  | 145901 | 59.50 | 13.43  | 86.01  | 1.48 | Clostridiales      | N | Y | Firmicutes     | Firmicutes bacterium CAG:137       |
| Sample_C6C.25  | C6C.M025  | 164 | 1.52 | 11693  | 4550   | 63434  | 62.54 | 8.31   | 86.90  | 1.57 | Clostridiales      | N | N | Firmicutes     | Firmicutes bacterium CAG:129       |

|                |           |     |      |        |        |        |       |        |       |      |               |   |   |            |                              |
|----------------|-----------|-----|------|--------|--------|--------|-------|--------|-------|------|---------------|---|---|------------|------------------------------|
| Sample_C6C.44  | C6C.M044  | 80  | 2.50 | 50646  | 15158  | 95455  | 58.46 | 17.46  | 94.63 | 1.34 | Clostridiales | N | N | Firmicutes | Firmicutes bacterium CAG:124 |
| Sample_C14A.48 | C14A.M048 | 91  | 2.39 | 42204  | 14515  | 245268 | 61.15 | 15.71  | 94.73 | 0.67 | Clostridiales | N | N | Firmicutes | Firmicutes bacterium CAG:124 |
| Sample_T12A.58 | T12A.M058 | 292 | 2.92 | 13689  | 4705   | 61575  | 56.12 | 11.10  | 84.34 | 1.34 | Clostridiales | N | N | Firmicutes | Firmicutes bacterium CAG:124 |
| Sample_C13A.6  | C13A.M006 | 116 | 3.24 | 45985  | 13774  | 128048 | 55.34 | 28.28  | 99.10 | 0.00 | Clostridiales | N | N | Firmicutes | Firmicutes bacterium CAG:110 |
| Sample_C6B.55  | C6B.M055  | 69  | 2.28 | 50826  | 17851  | 165117 | 57.00 | 24.12  | 97.76 | 0.00 | Clostridiales | N | N | Firmicutes | Firmicutes bacterium CAG:110 |
| Sample_C7A.29  | C7A.M029  | 25  | 2.16 | 124023 | 57815  | 230366 | 47.83 | 18.79  | 97.98 | 0.00 | Clostridiales | N | N | Firmicutes | Firmicutes bacterium CAG:102 |
| Sample_T10B.22 | T10B.M022 | 35  | 2.78 | 91493  | 38361  | 265474 | 38.47 | 22.10  | 99.36 | 0.64 | Clostridiales | N | N | Firmicutes | Firmicutes bacterium AM10-47 |
| Sample_T12A.18 | T12A.M018 | 39  | 1.33 | 46974  | 19041  | 138045 | 26.51 | 16.24  | 92.00 | 0.00 | Bacteria      | N | Y | Firmicutes | Firmicutes bacterium         |
| Sample_C3A.15  | C3A.M015  | 49  | 1.29 | 60061  | 14979  | 119543 | 26.71 | 14.25  | 92.41 | 1.12 | Bacteria      | N | N | Firmicutes | Firmicutes bacterium         |
| Sample_T2A.41  | T2A.M041  | 72  | 1.31 | 29471  | 9373   | 116361 | 24.65 | 10.71  | 93.82 | 0.56 | Bacteria      | N | N | Firmicutes | Firmicutes bacterium         |
| Sample_T10A.25 | T10A.M025 | 115 | 2.05 | 34733  | 7092   | 106361 | 51.59 | 10.08  | 97.20 | 0.00 | Clostridiales | N | N | Firmicutes | Firmicutes bacterium         |
| Sample_C13A.28 | C13A.M028 | 110 | 2.35 | 46908  | 9630   | 144832 | 42.35 | 14.10  | 94.22 | 1.75 | Clostridiales | N | N | Firmicutes | Faecalimonas umblicata       |
| Sample_C9A.36  | C9A.M036  | 97  | 2.00 | 33514  | 8549   | 141866 | 59.81 | 121.21 | 93.13 | 0.17 | Clostridiales | N | N | Firmicutes | Faecalibacterium prausnitzii |
| Sample_C5B.8   | C5B.M008  | 78  | 2.54 | 114022 | 12867  | 212438 | 57.73 | 66.55  | 99.63 | 0.17 | Clostridiales | N | N | Firmicutes | Faecalibacterium prausnitzii |
| Sample_C9A.39  | C9A.M039  | 94  | 2.23 | 37555  | 11924  | 89420  | 58.45 | 57.59  | 94.40 | 3.57 | Clostridiales | N | Y | Firmicutes | Faecalibacterium prausnitzii |
| Sample_T3A.11  | T3A.M011  | 85  | 2.09 | 33121  | 12710  | 149739 | 57.80 | 44.79  | 94.86 | 0.00 | Clostridiales | N | N | Firmicutes | Faecalibacterium prausnitzii |
| Sample_T4C.12  | T4C.M012  | 51  | 2.16 | 71192  | 24802  | 159641 | 59.19 | 24.65  | 94.62 | 1.70 | Clostridiales | N | N | Firmicutes | Faecalibacterium prausnitzii |
| Sample_T7C.8   | T7C.M008  | 66  | 1.92 | 37756  | 15699  | 75650  | 59.01 | 21.31  | 90.35 | 1.70 | Clostridiales | N | N | Firmicutes | Faecalibacterium prausnitzii |
| Sample_T2B.52  | T2B.M052  | 71  | 2.01 | 41199  | 14881  | 174680 | 60.57 | 18.20  | 91.83 | 1.53 | Clostridiales | N | N | Firmicutes | Faecalibacterium prausnitzii |
| Sample_T8C.7   | T8C.M007  | 295 | 2.00 | 8304   | 3601   | 35127  | 58.97 | 7.37   | 88.32 | 1.01 | Clostridiales | N | N | Firmicutes | Evetpia gabavorus            |
| Sample_T11B.8  | T11B.M008 | 39  | 2.34 | 71975  | 32037  | 235965 | 34.56 | 13.26  | 99.32 | 0.00 | Clostridiales | N | N | Firmicutes | Eubacterium ventriosum       |
| Sample_C11A.41 | C11A.M041 | 95  | 2.24 | 36643  | 12090  | 100758 | 33.93 | 17.27  | 97.30 | 0.84 | Bacteria      | N | N | Firmicutes | Eubacterium sp. TM06-47      |
| Sample_T10A.45 | T10A.M045 | 64  | 2.65 | 119381 | 25065  | 370194 | 39.03 | 159.61 | 98.65 | 0.34 | Clostridiales | N | N | Firmicutes | Eubacterium sp. OM08-24      |
| Sample_C5A.11  | C5A.M011  | 25  | 2.51 | 160753 | 52907  | 337239 | 36.35 | 38.27  | 98.65 | 0.00 | Clostridiales | N | N | Firmicutes | Eubacterium sp. CAG:86       |
| Sample_C2C.22  | C2C.M022  | 17  | 1.77 | 165701 | 82371  | 226016 | 45.30 | 30.18  | 92.17 | 0.67 | Clostridiales | N | N | Firmicutes | Eubacterium sp. CAG:841      |
| Sample_T1B.7   | T1B.M007  | 17  | 2.66 | 243557 | 71441  | 453789 | 36.00 | 16.31  | 99.32 | 0.00 | Clostridiales | N | N | Firmicutes | Eubacterium sp. CAG:76       |
| Sample_T2C.23  | T2C.M023  | 57  | 2.02 | 61202  | 14613  | 154706 | 34.01 | 17.30  | 98.65 | 0.00 | Clostridiales | N | N | Firmicutes | Eubacterium sp. CAG:581      |
| Sample_C6B.9   | C6B.M009  | 51  | 2.73 | 85770  | 28491  | 243606 | 32.22 | 28.12  | 98.65 | 0.00 | Clostridiales | N | N | Firmicutes | Eubacterium sp. CAG:38       |
| Sample_T6C.5   | T6C.M005  | 35  | 2.77 | 132351 | 47246  | 297957 | 41.78 | 25.22  | 98.65 | 0.00 | Clostridiales | N | N | Firmicutes | Eubacterium sp. CAG:38       |
| Sample_T16C.21 | T16C.M021 | 15  | 2.53 | 269593 | 119034 | 420107 | 33.14 | 52.65  | 98.65 | 0.67 | Clostridiales | N | N | Firmicutes | Eubacterium sp. CAG:274      |
| Sample_T11A.20 | T11A.M020 | 19  | 2.27 | 183800 | 94893  | 305198 | 33.90 | 36.97  | 98.65 | 1.34 | Clostridiales | N | N | Firmicutes | Eubacterium sp. CAG:274      |
| Sample_C4A.13  | C4A.M013  | 214 | 1.89 | 10843  | 4126   | 48731  | 33.01 | 8.36   | 96.41 | 0.34 | Clostridiales | N | N | Firmicutes | Eubacterium sp. CAG:274      |
| Sample_T2C.14  | T2C.M014  | 47  | 3.05 | 103797 | 42138  | 220490 | 36.74 | 22.30  | 98.90 | 0.00 | Clostridiales | N | N | Firmicutes | Eubacterium sp. CAG:252      |
| Sample_C12B.26 | C12B.M026 | 21  | 1.91 | 279536 | 38104  | 321054 | 38.08 | 17.49  | 98.65 | 0.00 | Clostridiales | N | N | Firmicutes | Eubacterium sp. CAG:251      |
| Sample_T7A.33  | T7A.M033  | 146 | 3.07 | 37437  | 9251   | 83300  | 52.35 | 11.75  | 97.98 | 0.00 | Clostridiales | N | N | Firmicutes | Eubacterium sp. CAG:115      |
| Sample_T10A.21 | T10A.M021 | 390 | 2.31 | 7298   | 2950   | 24746  | 37.85 | 7.14   | 83.49 | 1.17 | Bacteria      | N | N | Firmicutes | Eubacterium sp. AF18-3       |
| Sample_C10B.8  | C10B.M008 | 73  | 3.20 | 65985  | 24365  | 211479 | 43.18 | 43.84  | 98.43 | 0.67 | Clostridiales | Y | N | Firmicutes | Eubacterium sp.              |
| Sample_C3C.8   | C3C.M008  | 54  | 2.86 | 87712  | 23092  | 410106 | 36.07 | 23.93  | 97.98 | 0.67 | Clostridiales | Y | N | Firmicutes | Eubacterium sp.              |
| Sample_C6A.21  | C6A.M021  | 110 | 2.93 | 40177  | 13912  | 141802 | 41.16 | 20.28  | 94.07 | 1.17 | Clostridiales | Y | N | Firmicutes | Eubacterium sp.              |

|                |           |     |      |        |       |        |       |        |        |      |                     |   |   |                |                                  |
|----------------|-----------|-----|------|--------|-------|--------|-------|--------|--------|------|---------------------|---|---|----------------|----------------------------------|
| Sample_C3C.15  | C3C.M015  | 28  | 2.44 | 132159 | 37577 | 361100 | 37.76 | 18.87  | 97.86  | 0.73 | Clostridiales       | Y | N | Firmicutes     | Eubacterium sp.                  |
| Sample_T10A.40 | T10A.M040 | 72  | 2.70 | 68723  | 20199 | 179651 | 43.31 | 30.87  | 95.11  | 1.29 | Lachnospiraceae     | N | N | Firmicutes     | Eubacterium ramulus              |
| Sample_T16B.8  | T16B.M008 | 71  | 4.51 | 141646 | 29360 | 397190 | 50.94 | 17.36  | 99.66  | 0.07 | Enterobacteriaceae  | N | N | Proteobacteria | Escherichia coli                 |
| Sample_T10A.2  | T10A.M002 | 321 | 2.13 | 8308   | 3374  | 30800  | 38.37 | 7.46   | 90.42  | 0.56 | Lactobacillales     | N | N | Firmicutes     | Enterococcus hirae               |
| Sample_T13B.4  | T13B.M004 | 29  | 2.77 | 154650 | 50175 | 306601 | 37.54 | 34.39  | 99.15  | 0.19 | Lactobacillales     | N | N | Firmicutes     | Enterococcus faecalis            |
| Sample_C3A.2   | C3A.M002  | 71  | 4.63 | 118099 | 31534 | 491269 | 55.63 | 208.96 | 99.72  | 0.29 | Enterobacteriaceae  | N | N | Proteobacteria | Enterobacter cloacae             |
| Sample_T8C.32  | T8C.M032  | 187 | 7.27 | 63620  | 21614 | 227413 | 46.74 | 30.29  | 98.27  | 3.74 | Lachnospiraceae     | N | N | Firmicutes     | Eisenbergiella tayi              |
| Sample_C14A.30 | C14A.M030 | 146 | 1.67 | 15052  | 5686  | 70562  | 54.23 | 9.30   | 99.25  | 0.12 | Actinobacteria      | N | N | Actinobacteria | Eggerthella sp. CAG:298          |
| Sample_T11A.13 | T11A.M013 | 86  | 2.33 | 48186  | 12993 | 181056 | 41.87 | 12.10  | 94.15  | 0.03 | Lachnospiraceae     | N | N | Firmicutes     | Dorea longicatena                |
| Sample_C10A.66 | C10A.M066 | 165 | 2.44 | 26143  | 6766  | 96721  | 51.71 | 71.42  | 98.73  | 0.00 | Firmicutes          | N | N | Firmicutes     | Dialister succinatiphilus        |
| Sample_T7A.6   | T7A.M006  | 102 | 2.55 | 49199  | 12021 | 200373 | 52.47 | 46.60  | 99.90  | 0.00 | Firmicutes          | N | N | Firmicutes     | Dialister succinatiphilus        |
| Sample_T14C.28 | T14C.M028 | 100 | 2.11 | 34307  | 9384  | 189452 | 48.86 | 32.70  | 98.73  | 0.02 | Firmicutes          | N | N | Firmicutes     | Dialister sp. CAG:357            |
| Sample_T15C.26 | T15C.M026 | 28  | 1.76 | 120191 | 35181 | 279588 | 45.39 | 44.95  | 98.10  | 0.63 | Firmicutes          | N | N | Firmicutes     | Dialister invisus                |
| Sample_T10A.3  | T10A.M003 | 231 | 2.36 | 14025  | 4988  | 63994  | 58.93 | 8.45   | 91.25  | 1.58 | Deltaproteobacteria | Y | N | Proteobacteria | Desulfovibrio sp.                |
| Sample_T12A.48 | T12A.M048 | 329 | 2.00 | 7609   | 3164  | 30446  | 64.54 | 7.87   | 85.31  | 1.78 | Deltaproteobacteria | N | N | Proteobacteria | Desulfovibrio piger              |
| Sample_T8C.17  | T8C.M017  | 76  | 3.59 | 73973  | 26758 | 340216 | 61.13 | 16.67  | 99.40  | 0.00 | Deltaproteobacteria | N | N | Proteobacteria | Desulfovibrio fairfieldensis     |
| Sample_T2A.35  | T2A.M035  | 12  | 1.86 | 312029 | 73381 | 618619 | 32.20 | 40.29  | 89.74  | 0.85 | Bacteria            | N | N | Cyanobacteria  | Cyanobacteria bacterium UBA10660 |
| Sample_T13B.41 | T13B.M041 | 35  | 2.11 | 96997  | 30118 | 233689 | 45.84 | 13.09  | 98.38  | 0.19 | Actinobacteria      | N | N | Actinobacteria | Cryptobacterium sp. CAG:338      |
| Sample_C1C.51  | C1C.M051  | 23  | 2.81 | 233021 | 60476 | 552475 | 44.07 | 103.92 | 99.32  | 0.00 | Clostridiales       | N | N | Firmicutes     | Coprococcus eutactus             |
| Sample_T14B.7  | T14B.M007 | 27  | 3.09 | 252707 | 62717 | 531669 | 42.60 | 53.10  | 99.32  | 0.31 | Clostridiales       | N | N | Firmicutes     | Coprococcus eutactus             |
| Sample_C2A.55  | C2A.M055  | 59  | 2.32 | 56973  | 21574 | 211975 | 42.97 | 18.29  | 91.22  | 2.56 | Lachnospiraceae     | N | N | Firmicutes     | Coprococcus comes                |
| Sample_C10A.18 | C10A.M018 | 281 | 2.32 | 11370  | 3866  | 45714  | 44.24 | 8.02   | 85.86  | 1.01 | Clostridiales       | N | N | Firmicutes     | Coprococcus catus                |
| Sample_C3A.19  | C3A.M019  | 375 | 2.28 | 7263   | 3090  | 36063  | 43.66 | 7.49   | 81.54  | 2.47 | Clostridiales       | N | N | Firmicutes     | Coprococcus catus                |
| Sample_T11A.35 | T11A.M035 | 29  | 2.14 | 120742 | 50720 | 290430 | 60.04 | 31.60  | 100.00 | 0.81 | Actinobacteria      | N | N | Actinobacteria | Collinsella aerofaciens          |
| Sample_T3B.4   | T3B.M004  | 63  | 2.42 | 78849  | 19776 | 198584 | 59.84 | 27.73  | 99.19  | 0.81 | Actinobacteria      | N | N | Actinobacteria | Collinsella aerofaciens          |
| Sample_C12B.25 | C12B.M025 | 32  | 2.22 | 92143  | 40888 | 294291 | 59.81 | 20.06  | 100.00 | 0.81 | Actinobacteria      | N | N | Actinobacteria | Collinsella aerofaciens          |
| Sample_C14A.23 | C14A.M023 | 55  | 2.23 | 70485  | 24635 | 160322 | 59.92 | 18.70  | 96.77  | 1.61 | Actinobacteria      | N | N | Actinobacteria | Collinsella aerofaciens          |
| Sample_T13C.32 | T13C.M032 | 54  | 2.28 | 93628  | 24408 | 233881 | 59.69 | 17.49  | 100.00 | 1.61 | Actinobacteria      | N | N | Actinobacteria | Collinsella aerofaciens          |
| Sample_T8A.10  | T8A.M010  | 139 | 2.19 | 25344  | 7827  | 72622  | 60.09 | 12.80  | 98.38  | 0.81 | Actinobacteria      | N | Y | Actinobacteria | Collinsella aerofaciens          |
| Sample_C11B.22 | C11B.M022 | 194 | 2.20 | 16750  | 5225  | 74191  | 59.87 | 10.29  | 95.56  | 1.61 | Actinobacteria      | N | N | Actinobacteria | Collinsella aerofaciens          |
| Sample_T5A.16  | T5A.M016  | 57  | 3.02 | 145607 | 25382 | 263495 | 47.10 | 67.11  | 98.97  | 0.00 | Clostridiales       | N | N | Firmicutes     | Clostridium sp. TM06-18          |
| Sample_T16A.6  | T16A.M006 | 47  | 3.48 | 124311 | 43724 | 231110 | 44.01 | 22.52  | 99.36  | 0.63 | Clostridiales       | N | N | Firmicutes     | Clostridium sp. TM06-18          |
| Sample_T5A.3   | T5A.M003  | 111 | 3.05 | 39059  | 13014 | 130560 | 43.20 | 22.47  | 95.80  | 0.63 | Clostridiales       | N | N | Firmicutes     | Clostridium sp. TM06-18          |
| Sample_T3C.37  | T3C.M037  | 23  | 3.04 | 142869 | 87208 | 266303 | 43.77 | 30.29  | 98.65  | 0.00 | Clostridiales       | N | N | Firmicutes     | Clostridium sp. OM07-9AC         |
| Sample_C2B.36  | C2B.M036  | 26  | 1.11 | 56793  | 37668 | 91153  | 25.74 | 41.48  | 92.13  | 1.12 | Bacteria            | N | N | Firmicutes     | Clostridium sp. CAG:914          |
| Sample_C2C.10  | C2C.M010  | 15  | 1.03 | 93432  | 39361 | 348974 | 27.40 | 18.24  | 88.20  | 1.12 | Bacteria            | N | N | Firmicutes     | Clostridium sp. CAG:710          |
| Sample_T2C.25  | T2C.M025  | 67  | 1.17 | 25651  | 8614  | 74890  | 26.88 | 9.70   | 93.82  | 0.00 | Bacteria            | N | N | Firmicutes     | Clostridium sp. CAG:710          |
| Sample_C10A.63 | C10A.M063 | 32  | 1.14 | 57347  | 16765 | 116948 | 26.39 | 51.57  | 91.57  | 2.25 | Bacteria            | N | N | Firmicutes     | Clostridium sp. CAG:628          |
| Sample_C11C.8  | C11C.M008 | 401 | 2.28 | 6765   | 2945  | 27673  | 53.55 | 6.90   | 81.22  | 1.58 | Clostridiales       | N | N | Firmicutes     | Clostridium sp. CAG:58           |

|                |           |     |      |        |        |        |       |        |       |      |                 |   |   |            |                                 |
|----------------|-----------|-----|------|--------|--------|--------|-------|--------|-------|------|-----------------|---|---|------------|---------------------------------|
| Sample_T12A.26 | T12A.M026 | 44  | 2.96 | 145719 | 47110  | 343956 | 46.03 | 27.15  | 98.55 | 1.62 | Lachnospiraceae | N | N | Firmicutes | Clostridium sp. CAG:510         |
| Sample_T2C.39  | T2C.M039  | 25  | 1.75 | 139423 | 33031  | 327383 | 27.13 | 41.07  | 80.02 | 3.24 | Clostridiales   | N | Y | Firmicutes | Clostridium sp. CAG:492         |
| Sample_C10A.62 | C10A.M062 | 41  | 1.23 | 37538  | 18334  | 142053 | 27.94 | 21.26  | 93.82 | 3.93 | Bacteria        | N | N | Firmicutes | Clostridium sp. CAG:451         |
| Sample_C5A.58  | C5A.M058  | 103 | 1.44 | 22926  | 6531   | 51666  | 24.95 | 9.57   | 92.69 | 0.56 | Bacteria        | N | N | Firmicutes | Clostridium sp. CAG:433         |
| Sample_C12C.4  | C12C.M004 | 4   | 1.25 | 486054 | 275427 | 489255 | 27.73 | 84.76  | 93.25 | 1.28 | Bacteria        | N | N | Firmicutes | Clostridium sp. CAG:417         |
| Sample_C2B.31  | C2B.M031  | 23  | 2.36 | 188514 | 59105  | 516707 | 52.47 | 44.87  | 97.04 | 0.00 | Clostridiales   | N | N | Firmicutes | Clostridium sp. CAG:413         |
| Sample_T12A.35 | T12A.M035 | 298 | 2.26 | 9136   | 3853   | 38348  | 28.88 | 7.95   | 90.90 | 2.55 | Clostridiales   | N | N | Firmicutes | Clostridium sp. CAG:265         |
| Sample_T16B.3  | T16B.M003 | 37  | 2.69 | 99335  | 49197  | 230667 | 38.79 | 14.26  | 95.30 | 0.00 | Clostridiales   | N | N | Firmicutes | Clostridium sp. CAG:230         |
| Sample_C3A.6   | C3A.M006  | 51  | 2.02 | 55273  | 23126  | 141107 | 52.91 | 40.77  | 96.50 | 0.00 | Clostridia      | N | N | Firmicutes | Clostridium sp. CAG:226         |
| Sample_C8B.11  | C8B.M011  | 279 | 2.31 | 10411  | 4041   | 51518  | 49.91 | 9.67   | 89.88 | 2.74 | Clostridiales   | N | N | Firmicutes | Clostridium sp. AM33-3          |
| Sample_T5B.42  | T5B.M042  | 61  | 2.55 | 75494  | 18876  | 245229 | 48.97 | 11.94  | 99.05 | 0.00 | Clostridiales   | N | N | Firmicutes | Clostridium sp. AM28-20LB       |
| Sample_C4C.35  | C4C.M035  | 190 | 4.17 | 64454  | 8622   | 158477 | 36.39 | 18.71  | 98.65 | 0.00 | Clostridiales   | N | N | Firmicutes | Clostridium sp. AF34-13         |
| Sample_C6B.51  | C6B.M051  | 279 | 2.44 | 11630  | 4268   | 46341  | 50.10 | 8.54   | 90.73 | 0.18 | Clostridiales   | N | N | Firmicutes | Clostridium sp. AF27-2AA        |
| Sample_T2C.22  | T2C.M022  | 27  | 2.69 | 163964 | 57421  | 246850 | 40.92 | 47.37  | 99.32 | 0.00 | Clostridiales   | N | N | Firmicutes | Clostridium sp. AF15-41         |
| Sample_T10A.7  | T10A.M007 | 183 | 2.63 | 20578  | 6472   | 80085  | 28.62 | 14.39  | 93.97 | 1.41 | Clostridiales   | N | N | Firmicutes | Clostridium bartlettii CAG:1329 |
| Sample_T4A.23  | T4A.M023  | 33  | 2.04 | 226498 | 33195  | 432377 | 61.93 | 139.04 | 93.28 | 0.00 | Clostridiales   | N | N | Firmicutes | Clostridiales bacterium         |
| Sample_C14C.29 | C14C.M029 | 11  | 1.97 | 492194 | 110107 | 507677 | 53.27 | 49.15  | 97.31 | 0.00 | Clostridiales   | N | N | Firmicutes | Clostridiales bacterium         |
| Sample_T12A.33 | T12A.M033 | 44  | 1.98 | 69654  | 19697  | 156262 | 60.36 | 47.38  | 93.95 | 2.01 | Clostridiales   | N | N | Firmicutes | Clostridiales bacterium         |
| Sample_C12C.8  | C12C.M008 | 48  | 2.18 | 67053  | 26173  | 158713 | 56.83 | 44.84  | 86.24 | 1.95 | Clostridiales   | N | Y | Firmicutes | Clostridiales bacterium         |
| Sample_C12C.16 | C12C.M016 | 20  | 1.93 | 142514 | 66237  | 277625 | 49.60 | 40.05  | 95.96 | 0.81 | Clostridia      | N | N | Firmicutes | Clostridiales bacterium         |
| Sample_T4B.21  | T4B.M021  | 99  | 2.33 | 40991  | 12504  | 112629 | 56.86 | 37.95  | 98.76 | 0.04 | Clostridiales   | N | N | Firmicutes | Clostridiales bacterium         |
| Sample_T8C.10  | T8C.M010  | 30  | 2.55 | 173464 | 48433  | 316317 | 60.39 | 35.28  | 94.96 | 1.34 | Clostridiales   | N | N | Firmicutes | Clostridiales bacterium         |
| Sample_T4A.29  | T4A.M029  | 47  | 2.30 | 84468  | 22403  | 196328 | 60.79 | 31.10  | 91.94 | 0.00 | Clostridiales   | N | N | Firmicutes | Clostridiales bacterium         |
| Sample_T8B.40  | T8B.M040  | 5   | 1.49 | 411227 | 143752 | 451461 | 47.56 | 28.55  | 92.40 | 0.70 | Clostridiales   | N | N | Firmicutes | Clostridiales bacterium         |
| Sample_C3A.45  | C3A.M045  | 92  | 2.57 | 63271  | 9803   | 215316 | 56.26 | 26.23  | 94.63 | 3.36 | Clostridiales   | N | N | Firmicutes | Clostridiales bacterium         |
| Sample_C3A.12  | C3A.M012  | 342 | 2.44 | 8693   | 3400   | 37241  | 58.64 | 22.37  | 85.50 | 0.40 | Clostridia      | N | N | Firmicutes | Clostridiales bacterium         |
| Sample_C12C.54 | C12C.M054 | 182 | 2.24 | 16202  | 5718   | 49293  | 57.15 | 20.33  | 94.57 | 1.14 | Clostridiales   | N | N | Firmicutes | Clostridiales bacterium         |
| Sample_T15C.32 | T15C.M032 | 55  | 2.47 | 98451  | 26056  | 188503 | 56.80 | 17.30  | 90.60 | 2.68 | Clostridiales   | N | Y | Firmicutes | Clostridiales bacterium         |
| Sample_T10A.5  | T10A.M005 | 30  | 2.34 | 134615 | 56849  | 424356 | 53.08 | 16.34  | 97.90 | 0.93 | Clostridiales   | N | N | Firmicutes | Clostridiales bacterium         |
| Sample_C7B.32  | C7B.M032  | 45  | 1.93 | 56794  | 22867  | 162782 | 61.56 | 15.21  | 94.29 | 1.01 | Clostridiales   | N | N | Firmicutes | Clostridiales bacterium         |
| Sample_C4A.23  | C4A.M023  | 61  | 2.37 | 63576  | 19133  | 260940 | 56.42 | 13.93  | 89.26 | 1.01 | Clostridiales   | N | Y | Firmicutes | Clostridiales bacterium         |
| Sample_T4B.13  | T4B.M013  | 73  | 2.38 | 51847  | 17794  | 185854 | 59.95 | 13.33  | 93.28 | 1.34 | Clostridiales   | N | Y | Firmicutes | Clostridiales bacterium         |
| Sample_C1C.22  | C1C.M022  | 144 | 2.58 | 31209  | 7733   | 131032 | 54.82 | 12.35  | 96.42 | 0.67 | Clostridiales   | N | N | Firmicutes | Clostridiales bacterium         |
| Sample_C8B.19  | C8B.M019  | 41  | 1.84 | 75471  | 20448  | 160587 | 62.43 | 12.29  | 91.94 | 0.02 | Clostridiales   | N | N | Firmicutes | Clostridiales bacterium         |
| Sample_C12A.35 | C12A.M035 | 90  | 2.08 | 36467  | 11255  | 116893 | 47.02 | 11.89  | 92.39 | 0.13 | Clostridiales   | N | N | Firmicutes | Clostridiales bacterium         |
| Sample_C14A.21 | C14A.M021 | 138 | 2.45 | 36772  | 7632   | 200675 | 52.32 | 11.68  | 95.97 | 0.00 | Clostridiales   | N | N | Firmicutes | Clostridiales bacterium         |
| Sample_C6C.7   | C6C.M007  | 91  | 2.34 | 36790  | 12846  | 130513 | 56.53 | 11.50  | 97.90 | 0.04 | Clostridiales   | N | N | Firmicutes | Clostridiales bacterium         |
| Sample_C8C.22  | C8C.M022  | 182 | 3.00 | 24838  | 8229   | 68669  | 58.23 | 11.32  | 99.30 | 0.93 | Clostridiales   | N | N | Firmicutes | Clostridiales bacterium         |
| Sample_C3A.14  | C3A.M014  | 235 | 2.79 | 16342  | 5846   | 69169  | 58.98 | 10.41  | 93.66 | 0.27 | Clostridia      | N | N | Firmicutes | Clostridiales bacterium         |

|                |           |     |      |        |       |        |       |        |        |      |                     |   |   |                 |                                                |
|----------------|-----------|-----|------|--------|-------|--------|-------|--------|--------|------|---------------------|---|---|-----------------|------------------------------------------------|
| Sample_C4A.22  | C4A.M022  | 188 | 2.06 | 14676  | 5256  | 83100  | 58.35 | 8.91   | 89.59  | 0.00 | Clostridiales       | N | N | Firmicutes      | Clostridiales bacterium                        |
| Sample_C12C.30 | C12C.M030 | 305 | 2.64 | 12080  | 4026  | 63882  | 54.99 | 8.89   | 92.61  | 0.94 | Clostridiales       | N | N | Firmicutes      | Clostridiales bacterium                        |
| Sample_T12A.30 | T12A.M030 | 219 | 1.98 | 13191  | 4077  | 43380  | 43.57 | 8.49   | 93.58  | 0.00 | Clostridiales       | N | N | Firmicutes      | Clostridiales bacterium                        |
| Sample_T10A.43 | T10A.M043 | 319 | 2.71 | 10536  | 4285  | 65158  | 60.90 | 8.16   | 91.87  | 0.96 | Firmicutes          | N | N | Firmicutes      | Clostridiales bacterium                        |
| Sample_C3A.29  | C3A.M029  | 324 | 2.38 | 9632   | 3604  | 36942  | 58.63 | 8.03   | 86.78  | 3.79 | Clostridia          | N | N | Firmicutes      | Clostridiales bacterium                        |
| Sample_C6B.50  | C6B.M050  | 308 | 2.44 | 10542  | 4049  | 55491  | 46.41 | 7.92   | 96.30  | 0.34 | Clostridiales       | N | N | Firmicutes      | Clostridiales bacterium                        |
| Sample_T17A.23 | T17A.M023 | 75  | 2.98 | 60023  | 22808 | 154465 | 48.90 | 17.78  | 99.68  | 0.16 | Clostridiales       | N | N | Firmicutes      | Clostridiaceae bacterium TF01-6                |
| Sample_T8C.15  | T8C.M015  | 89  | 2.06 | 35238  | 11212 | 156510 | 53.17 | 13.97  | 98.38  | 1.08 | Clostridia          | N | N | Firmicutes      | Clostridia bacterium                           |
| Sample_C2C.9   | C2C.M009  | 123 | 2.72 | 35757  | 12131 | 95631  | 54.80 | 10.21  | 99.19  | 0.00 | Clostridia          | N | N | Firmicutes      | Clostridia bacterium                           |
| Sample_T1A.11  | T1A.M011  | 120 | 2.35 | 33110  | 9341  | 99729  | 33.61 | 18.24  | 99.05  | 0.47 | Bacteria            | N | N | Firmicutes      | Catenibacterium sp. AM22-15                    |
| Sample_T2B.15  | T2B.M015  | 27  | 1.97 | 138251 | 29491 | 445085 | 32.76 | 46.39  | 88.03  | 0.85 | Bacteria            | N | N | Melainabacterii | Candidatus Gastranaerophilales bacterium HUM_2 |
| Sample_T12A.6  | T12A.M006 | 94  | 2.06 | 33416  | 10345 | 99480  | 37.51 | 10.51  | 97.31  | 1.34 | Clostridiales       | Y | N | Firmicutes      | Butyrivibrio sp.                               |
| Sample_T15A.23 | T15A.M023 | 197 | 4.34 | 35481  | 11060 | 163264 | 42.22 | 11.52  | 98.01  | 0.00 | Bacteria            | N | N | Butyricimonas   | Butyricimonas virosa                           |
| Sample_C8A.13  | C8A.M013  | 820 | 4.55 | 6962   | 2664  | 36887  | 42.69 | 9.18   | 81.30  | 3.48 | Bacteria            | N | N | Butyricimonas   | Butyricimonas synergistica                     |
| Sample_C9B.31  | C9B.M031  | 174 | 2.38 | 20220  | 6095  | 104812 | 57.37 | 9.73   | 97.65  | 0.89 | Clostridiales       | N | N | Firmicutes      | Butyricoccus sp. OM04-18BH                     |
| Sample_C6B.23  | C6B.M023  | 342 | 2.04 | 7146   | 2908  | 72907  | 57.99 | 8.24   | 87.64  | 1.01 | Clostridiales       | N | N | Firmicutes      | Butyricoccus sp. OM04-18BH                     |
| Sample_C8C.51  | C8C.M051  | 266 | 2.28 | 12067  | 4285  | 48981  | 43.66 | 7.82   | 95.00  | 0.00 | Proteobacteria      | N | Y | Proteobacteria  | Burkholderiales bacterium YL45                 |
| Sample_T11A.2  | T11A.M002 | 93  | 2.71 | 48359  | 13640 | 161614 | 48.42 | 34.84  | 100.00 | 0.11 | Proteobacteria      | N | N | Proteobacteria  | Burkholderiales bacterium                      |
| Sample_T8B.46  | T8B.M046  | 78  | 3.08 | 69131  | 21756 | 247583 | 44.82 | 20.42  | 98.73  | 0.63 | Clostridiales       | N | N | Firmicutes      | Blautia sp. OM07-19                            |
| Sample_T17A.4  | T17A.M004 | 39  | 2.64 | 91661  | 35344 | 216567 | 44.35 | 114.37 | 97.37  | 0.00 | Clostridiales       | N | N | Firmicutes      | Blautia sp. N6H1-15                            |
| Sample_T2A.50  | T2A.M050  | 176 | 2.53 | 19562  | 6893  | 125829 | 46.10 | 9.38   | 95.60  | 2.00 | Clostridiales       | N | N | Firmicutes      | Blautia sp. KGMB01111                          |
| Sample_T17A.22 | T17A.M022 | 23  | 2.89 | 163242 | 70917 | 472243 | 43.90 | 26.95  | 98.73  | 0.00 | Clostridiales       | N | N | Firmicutes      | Blautia sp. CAG:257                            |
| Sample_C13B.8  | C13B.M008 | 146 | 3.59 | 43186  | 12149 | 139945 | 41.52 | 49.24  | 97.46  | 0.00 | Clostridiales       | N | N | Firmicutes      | Blautia obeum                                  |
| Sample_C2B.43  | C2B.M043  | 74  | 3.00 | 66305  | 20558 | 205908 | 41.87 | 27.89  | 98.18  | 0.00 | Clostridiales       | N | N | Firmicutes      | Blautia obeum                                  |
| Sample_C9A.26  | C9A.M026  | 279 | 4.22 | 26219  | 7072  | 141645 | 59.87 | 12.02  | 99.70  | 0.00 | Deltaproteobacteria | N | N | Proteobacteria  | Bilophila wadsworthia                          |
| Sample_C6B.53  | C6B.M053  | 20  | 2.20 | 187935 | 81366 | 357371 | 56.29 | 17.95  | 100.00 | 0.23 | Bifidobacteriaceae  | N | N | Actinobacteria  | Bifidobacterium pseudocatenulatum              |
| Sample_C12A.23 | C12A.M023 | 30  | 2.40 | 133636 | 53574 | 416725 | 60.09 | 60.12  | 100.00 | 0.00 | Bifidobacteriaceae  | N | N | Actinobacteria  | Bifidobacterium longum                         |
| Sample_T10A.9  | T10A.M009 | 321 | 2.19 | 8830   | 3200  | 51029  | 58.68 | 7.71   | 84.70  | 1.52 | Bifidobacteriaceae  | N | N | Actinobacteria  | Bifidobacterium dentium                        |
| Sample_T4C.3   | T4C.M003  | 30  | 2.14 | 100869 | 40851 | 277194 | 62.97 | 57.38  | 97.69  | 0.92 | Bifidobacteriaceae  | N | N | Actinobacteria  | Bifidobacterium bifidum                        |
| Sample_T16C.23 | T16C.M023 | 20  | 1.91 | 165679 | 53915 | 321439 | 60.47 | 63.01  | 100.00 | 0.00 | Bifidobacteriaceae  | N | N | Actinobacteria  | Bifidobacterium animalis                       |
| Sample_C14C.30 | C14C.M030 | 27  | 2.08 | 120896 | 39767 | 279004 | 59.71 | 26.16  | 99.54  | 0.11 | Bifidobacteriaceae  | N | N | Actinobacteria  | Bifidobacterium adolescentis                   |
| Sample_C6B.45  | C6B.M045  | 330 | 5.21 | 23054  | 7701  | 71637  | 42.01 | 19.46  | 90.74  | 2.95 | Bacteroides         | N | N | Bacteroidetes   | Bacteroides xylanisolvens                      |
| Sample_C1C.31  | C1C.M031  | 144 | 4.55 | 52346  | 15424 | 147454 | 42.19 | 121.66 | 98.77  | 0.38 | Bacteroidales       | N | N | Bacteroidetes   | Bacteroides vulgatus                           |
| Sample_T4B.33  | T4B.M033  | 76  | 4.12 | 86152  | 28597 | 293083 | 46.66 | 26.25  | 98.07  | 0.00 | Bacteroidales       | N | N | Bacteroidetes   | Bacteroides uniformis                          |
| Sample_T3A.13  | T3A.M013  | 75  | 5.67 | 133992 | 37572 | 319955 | 42.70 | 16.47  | 95.58  | 0.24 | Bacteroides         | N | N | Bacteroidetes   | Bacteroides thetaiotaomicron                   |
| Sample_T18C.24 | T18C.M024 | 39  | 3.41 | 127211 | 48286 | 431556 | 46.25 | 15.07  | 98.14  | 1.12 | Bacteroidales       | N | N | Bacteroidetes   | Bacteroides stercoris                          |
| Sample_T4B.2   | T4B.M002  | 77  | 3.25 | 68160  | 22735 | 216099 | 42.61 | 25.65  | 88.59  | 0.00 | Bacteroidales       | N | N | Bacteroidetes   | Bacteroides sp. CAG:1076                       |
| Sample_C9A.20  | C9A.M020  | 76  | 3.36 | 62399  | 22287 | 199851 | 42.27 | 77.65  | 94.06  | 0.19 | Bacteroidales       | N | N | Bacteroidetes   | Bacteroides sp. AM16-15                        |
| Sample_C6C.40  | C6C.M040  | 35  | 3.23 | 224828 | 57674 | 359092 | 43.28 | 18.99  | 99.62  | 0.00 | Bacteroidales       | N | N | Bacteroidetes   | Bacteroides sp. AF14-46                        |



|                |           |     |      |        |        |        |       |        |        |      |                  |   |   |                |                                |
|----------------|-----------|-----|------|--------|--------|--------|-------|--------|--------|------|------------------|---|---|----------------|--------------------------------|
| Sample_T17A.20 | T17A.M020 | 70  | 4.93 | 134055 | 41811  | 226875 | 43.45 | 48.96  | 98.65  | 1.13 | Bacteroidales    | N | N | Bacteroidetes  | Bacteroides sartorii           |
| Sample_T2C.32  | T2C.M032  | 79  | 3.60 | 62599  | 25797  | 177373 | 44.33 | 81.62  | 98.75  | 0.47 | Bacteroidales    | N | N | Bacteroidetes  | Bacteroides plebeius           |
| Sample_T4A.21  | T4A.M021  | 103 | 6.10 | 93146  | 31288  | 280203 | 41.88 | 156.83 | 97.33  | 1.43 | Bacteroides      | N | N | Bacteroidetes  | Bacteroides ovatus             |
| Sample_C3A.41  | C3A.M041  | 73  | 4.84 | 109816 | 35744  | 347393 | 42.79 | 26.50  | 88.71  | 0.00 | Bacteroidales    | N | N | Bacteroidetes  | Bacteroides intestinalis       |
| Sample_T3A.35  | T3A.M035  | 43  | 4.73 | 212391 | 53850  | 550226 | 43.26 | 26.55  | 98.31  | 0.00 | Bacteroidales    | N | N | Bacteroidetes  | Bacteroides fragilis           |
| Sample_T5A.17  | T5A.M017  | 55  | 4.65 | 132233 | 46433  | 489963 | 43.38 | 20.46  | 97.18  | 0.00 | Bacteroidales    | N | N | Bacteroidetes  | Bacteroides fragilis           |
| Sample_T15A.17 | T15A.M017 | 90  | 3.63 | 57561  | 18472  | 309392 | 44.77 | 16.23  | 94.85  | 3.10 | Bacteroidales    | N | N | Bacteroidetes  | Bacteroides eggerthii          |
| Sample_T10C.7  | T10C.M007 | 66  | 3.26 | 98192  | 24510  | 180161 | 46.03 | 38.70  | 96.71  | 0.14 | Bacteroidales    | N | N | Bacteroidetes  | Bacteroides coprophilus        |
| Sample_T7B.14  | T7B.M014  | 112 | 3.23 | 47193  | 14372  | 108691 | 40.67 | 40.82  | 97.76  | 0.00 | Bacteroidales    | N | N | Bacteroidetes  | Bacteroides coprocola CAG:162  |
| Sample_T5C.41  | T5C.M041  | 66  | 3.44 | 88321  | 27823  | 218094 | 45.62 | 28.79  | 95.78  | 1.38 | Bacteroidales    | N | N | Bacteroidetes  | Bacteroides clarus             |
| Sample_C9A.5   | C9A.M005  | 69  | 6.20 | 131979 | 48611  | 309863 | 42.76 | 25.56  | 92.72  | 0.47 | Bacteroidales    | N | N | Bacteroidetes  | Bacteroides cellulolyticus     |
| Sample_T8C.16  | T8C.M016  | 91  | 4.48 | 70720  | 24233  | 397618 | 42.02 | 54.77  | 92.13  | 0.90 | Bacteroides      | N | N | Bacteroidetes  | Bacteroides caccae             |
| Sample_C8C.16  | C8C.M016  | 43  | 1.93 | 105578 | 20913  | 209440 | 51.01 | 33.81  | 97.84  | 0.00 | Bacteria         | N | N | Proteobacteria | Azospirillum sp. 51_20         |
| Sample_T5C.17  | T5C.M017  | 73  | 1.72 | 43028  | 10339  | 161182 | 47.29 | 11.44  | 95.69  | 0.00 | Bacteria         | Y | N | Proteobacteria | Azospirillum sp.               |
| Sample_T18A.9  | T18A.M009 | 40  | 2.80 | 120645 | 36319  | 239364 | 63.51 | 16.89  | 100.00 | 0.00 | Actinobacteria   | N | N | Actinobacteria | Asaccharobacter celatus        |
| Sample_C7C.21  | C7C.M021  | 30  | 2.02 | 104972 | 38656  | 402937 | 43.57 | 45.20  | 97.31  | 0.00 | Clostridiales    | N | N | Firmicutes     | Anaerotruncus sp. CAG:528      |
| Sample_T8C.30  | T8C.M030  | 414 | 2.79 | 8613   | 3342   | 35617  | 63.87 | 7.79   | 91.54  | 0.36 | Clostridiales    | N | N | Firmicutes     | Anaerotruncus sp. 22A2-44      |
| Sample_C9C.17  | C9C.M017  | 314 | 2.51 | 10298  | 3885   | 51517  | 44.95 | 8.05   | 95.09  | 0.78 | Clostridiales    | N | N | Firmicutes     | Anaerotignum lactatifermentans |
| Sample_T17A.15 | T17A.M015 | 68  | 3.04 | 68214  | 21270  | 236988 | 44.76 | 14.30  | 99.32  | 4.03 | Clostridiales    | N | N | Firmicutes     | Anaerostipes sp. CAG:276       |
| Sample_C10B.19 | C10B.M019 | 137 | 2.42 | 28368  | 7210   | 120530 | 37.29 | 24.15  | 98.32  | 0.00 | Clostridiales    | N | N | Firmicutes     | Anaerostipes hadrus            |
| Sample_T3B.27  | T3B.M027  | 63  | 2.68 | 75040  | 21443  | 136260 | 55.08 | 11.00  | 99.27  | 0.00 | Bacteroidetes    | N | N | Bacteroidetes  | Alistipes sp. AF17-16          |
| Sample_T13B.8  | T13B.M008 | 103 | 2.53 | 32697  | 12948  | 139307 | 58.78 | 10.60  | 98.95  | 0.96 | Bacteroidetes    | N | N | Bacteroidetes  | Alistipes sp. AF17-16          |
| Sample_T5C.28  | T5C.M028  | 102 | 2.57 | 39578  | 12657  | 115342 | 60.38 | 10.42  | 95.67  | 0.48 | Bacteroidetes    | N | N | Bacteroidetes  | Alistipes sp. 6CPBBH3          |
| Sample_T4A.9   | T4A.M009  | 127 | 3.65 | 58039  | 12871  | 166492 | 57.62 | 44.52  | 99.03  | 0.00 | Bacteroidetes    | N | N | Bacteroidetes  | Alistipes shahii               |
| Sample_T6A.2   | T6A.M002  | 307 | 3.14 | 13781  | 5058   | 73670  | 58.37 | 8.51   | 94.33  | 1.92 | Bacteroidetes    | N | N | Bacteroidetes  | Alistipes shahii               |
| Sample_T11A.24 | T11A.M024 | 24  | 2.36 | 190710 | 41356  | 754951 | 54.50 | 44.90  | 99.51  | 0.96 | Bacteroidetes    | N | N | Bacteroidetes  | Alistipes putredinis           |
| Sample_T16B.22 | T16B.M022 | 20  | 3.10 | 387013 | 149688 | 603995 | 58.44 | 31.63  | 98.79  | 0.48 | Bacteroidetes    | N | N | Bacteroidetes  | Alistipes onderdonkii          |
| Sample_C10A.35 | C10A.M035 | 51  | 2.61 | 86862  | 32076  | 194409 | 46.21 | 12.87  | 99.51  | 0.48 | Bacteroidetes    | N | N | Bacteroidetes  | Alistipes indistinctus         |
| Sample_C11B.34 | C11B.M034 | 70  | 2.77 | 76851  | 20479  | 196644 | 54.86 | 12.25  | 100.00 | 0.48 | Bacteroidetes    | N | N | Bacteroidetes  | Alistipes indistinctus         |
| Sample_C4A.40  | C4A.M040  | 54  | 2.46 | 64944  | 23554  | 128496 | 59.22 | 13.15  | 89.66  | 0.48 | Bacteroidetes    | N | N | Bacteroidetes  | Alistipes finegoldii CAG:68    |
| Sample_C14A.10 | C14A.M010 | 35  | 2.82 | 188077 | 52028  | 492714 | 55.25 | 89.23  | 97.95  | 0.68 | Bacteria         | N | N | /errucomicrobi | Akkermansia muciniphila        |
| Sample_C4A.34  | C4A.M034  | 43  | 3.00 | 122869 | 57477  | 232942 | 58.26 | 13.72  | 97.95  | 0.00 | Bacteria         | N | N | /errucomicrobi | Akkermansia muciniphila        |
| Sample_T4B.14  | T4B.M014  | 167 | 1.67 | 13785  | 4784   | 35100  | 45.97 | 8.49   | 88.64  | 0.81 | Clostridia       | N | N | Proteobacteria | Acidiphilium sp. CAG:727       |
| Sample_T13C.38 | T13C.M038 | 41  | 2.35 | 86820  | 30702  | 285636 | 56.03 | 38.96  | 99.38  | 0.60 | Selenomonadales  | N | N | Firmicutes     | Acidaminococcus sp. CAG:542    |
| Sample_T14A.43 | T14A.M043 | 74  | 1.29 | 35088  | 6622   | 109203 | 24.99 | 10.79  | 90.44  | 2.53 | Bacteria         | N | N | Tenericutes    | Acholeplasma sp. CAG:878       |
| Sample_T4B.18  | T4B.M018  | 43  | 2.43 | 96568  | 28460  | 252988 | 53.55 | 39.95  | 82.71  | 0.79 | Rhodospirillales | N | N | Proteobacteria | Acetobacter sp. CAG:977        |
| Sample_C13C.9  | C13C.M009 | 46  | 2.75 | 103560 | 30422  | 245191 | 43.32 | 52.36  | 99.41  | 0.19 | Lachnospiraceae  | N | N | Firmicutes     | [Ruminococcus] gnavus          |
| Sample_C10A.38 | C10A.M038 | 56  | 2.75 | 97128  | 27490  | 277919 | 45.23 | 48.87  | 98.99  | 0.00 | Clostridiales    | N | N | Firmicutes     | [Eubacterium] siraeum          |
| Sample_T15C.19 | T15C.M019 | 79  | 3.05 | 105778 | 25903  | 194877 | 41.51 | 26.03  | 99.51  | 0.00 | Lachnospiraceae  | N | N | Firmicutes     | [Eubacterium] rectale          |

|               |           |     |      |        |       |        |       |       |       |      |               |   |   |               |                             |
|---------------|-----------|-----|------|--------|-------|--------|-------|-------|-------|------|---------------|---|---|---------------|-----------------------------|
| Sample_C5A.41 | C5A.M041  | 48  | 2.85 | 90800  | 37805 | 300168 | 37.35 | 73.24 | 98.65 | 0.02 | Clostridiales | N | N | Firmicutes    | [Eubacterium] eligens       |
| Sample_C4A.32 | C4A.M032  | 26  | 2.68 | 140251 | 49101 | 670344 | 37.38 | 21.97 | 98.63 | 0.00 | Clostridiales | N | N | Firmicutes    | [Eubacterium] eligens       |
| Sample_T17A.9 | T17A.M009 | 388 | 3.59 | 14149  | 4041  | 57058  | 45.05 | 10.08 | 91.50 | 0.00 | Bacteria      | N | N | Firmicutes    | [Clostridium] innocuum      |
| Sample_T5A.1  | T5A.M001  | 76  | 5.95 | 135433 | 36632 | 590821 | 49.22 | 29.63 | 99.25 | 0.00 | Clostridiales | N | N | Firmicutes    | [Clostridium] bolteae       |
| Sample_C3C.22 | C3C.M022  | 31  | 2.68 | 160829 | 47299 | 245494 | 42.08 | 52.22 | 98.65 | 2.68 | Clostridiales | N | N | Bacteroidetes | [Bacteroides] pectinophilus |

Table S6. Significant differential species-level genome bins (SGBs) found between subgroups

| Differential SGBs |                             | Result statistics (Centered Log-ratio transformed abundance) |                          |                             |                           |                             |                           |                          |                        |                           |                         |                           |                         | Comparison between probiotic group at different time points |                                                  |                                                 |
|-------------------|-----------------------------|--------------------------------------------------------------|--------------------------|-----------------------------|---------------------------|-----------------------------|---------------------------|--------------------------|------------------------|---------------------------|-------------------------|---------------------------|-------------------------|-------------------------------------------------------------|--------------------------------------------------|-------------------------------------------------|
|                   |                             |                                                              |                          |                             |                           |                             |                           |                          |                        |                           |                         |                           |                         | Corrected P-value, T-test                                   |                                                  |                                                 |
| SGB ID            | Probiotic group day 0xonomy | Mean Probiotic group day 0                                   | Mean Placebo group day 0 | Mean Probiotic group day 30 | Mean Placebo group day 30 | Mean Probiotic group day 90 | Mean Placebo group day 90 | SD Probiotic group day 0 | SD Placebo group day 0 | SD Probiotic group day 30 | SD Placebo group day 30 | SD Probiotic group day 90 | SD Placebo group day 90 | Probiotic group day 0 vs Probiotic group day 30             | Probiotic group day 30 vs Probiotic group day 90 | Probiotic group day 0 vs Probiotic group day 90 |
| T16C.M023         | Bifidobacterium animalis    | -0.49                                                        | -0.61                    | 1.02                        | -0.18                     | 1.05                        | -0.50                     | 0.18                     | 0.13                   | 1.54                      | 1.32                    | 1.57                      | 0.14                    | 0.01                                                        | 0.98                                             | 0.01                                            |
| C1A.M016          | Ruminococcus callidus       | -0.21                                                        | 0.08                     | 0.47                        | 0.06                      | 0.02                        | 0.17                      | 0.77                     | 1.18                   | 1.16                      | 1.04                    | 0.75                      | 1.06                    | 0.05                                                        | 0.99                                             | 0.96                                            |
| C5A.M066          | Parabacteroides distasonis  | 1.35                                                         | 1.10                     | 0.63                        | 0.76                      | 0.80                        | 0.92                      | 1.12                     | 1.03                   | 0.86                      | 0.93                    | 0.75                      | 1.15                    | 0.04                                                        | 0.86                                             | 0.97                                            |
| C14B.M022         | Roseburia hominis           | 0.02                                                         | 0.22                     | 0.24                        | 0.49                      | 0.24                        | 0.49                      | 0.93                     | 0.96                   | 0.85                      | 1.25                    | 0.85                      | 1.25                    | 0.96                                                        | 0.99                                             | 0.05                                            |

| Differential SGBs |                                     | Result statistics (Centered Log-ratio transformed abundance) |                          |                             |                           |                             |                           |                          |                        |                           |                         |                           |                         | Comparison between placebo group at different time points |                                              |                                             |
|-------------------|-------------------------------------|--------------------------------------------------------------|--------------------------|-----------------------------|---------------------------|-----------------------------|---------------------------|--------------------------|------------------------|---------------------------|-------------------------|---------------------------|-------------------------|-----------------------------------------------------------|----------------------------------------------|---------------------------------------------|
|                   |                                     |                                                              |                          |                             |                           |                             |                           |                          |                        |                           |                         |                           |                         | Corrected P-value, T-test                                 |                                              |                                             |
| SGB ID            | Probiotic group day 0xonomy         | Mean Probiotic group day 0                                   | Mean Placebo group day 0 | Mean Probiotic group day 30 | Mean Placebo group day 30 | Mean Probiotic group day 90 | Mean Placebo group day 90 | SD Probiotic group day 0 | SD Placebo group day 0 | SD Probiotic group day 30 | SD Placebo group day 30 | SD Probiotic group day 90 | SD Placebo group day 90 | Placebo group day 0 vs Placebo group day 30               | Placebo group day 30 vs Placebo group day 90 | Placebo group day 0 vs Placebo group day 90 |
| C14A.M016         | Lachnospiraceae bacterium AM48-27BH | -0.11                                                        | -0.04                    | 0.13                        | 0.56                      | -0.07                       | 0.44                      | 0.47                     | 0.78                   | 0.58                      | 0.77                    | 0.42                      | 0.63                    | 0.05                                                      | 0.78                                         | 0.01                                        |
| C8B.M011          | Clostridium sp. AM33-3              | -0.12                                                        | -0.12                    | -0.07                       | 0.47                      | 0.01                        | -0.12                     | 0.48                     | 0.62                   | 0.46                      | 0.77                    | 0.57                      | 0.50                    | 0.02                                                      | 0.04                                         | 0.68                                        |
| T16C.M021         | Eubacterium sp. CAG:274             | -0.12                                                        | -0.11                    | 0.11                        | 0.64                      | 0.58                        | 0.52                      | 0.86                     | 1.01                   | 0.94                      | 1.26                    | 1.66                      | 1.41                    | 0.03                                                      | 0.96                                         | 0.05                                        |
| T17A.M023         | Clostridiaceae bacterium TF01-6     | 0.58                                                         | 0.19                     | 0.75                        | 0.90                      | 0.51                        | 0.86                      | 0.91                     | 0.80                   | 0.93                      | 0.79                    | 0.66                      | 0.80                    | 0.03                                                      | 0.93                                         | 0.04                                        |
| T16A.M006         | Clostridium sp. TM06-18             | 1.34                                                         | 0.87                     | 1.18                        | 1.62                      | 1.32                        | 0.89                      | 1.49                     | 1.05                   | 1.27                      | 0.71                    | 1.27                      | 0.68                    | 0.03                                                      | 0.01                                         | 0.95                                        |
| C6C.M025          | Firmicutes bacterium CAG:129        | 0.10                                                         | 0.66                     | -0.09                       | -0.03                     | 0.03                        | 0.66                      | 0.73                     | 1.17                   | 0.53                      | 0.88                    | 0.82                      | 0.96                    | 0.09                                                      | 0.05                                         | 0.99                                        |
| C12C.M016         | Clostridiales bacterium             | -0.12                                                        | 0.31                     | -0.19                       | -0.07                     | 0.35                        | 0.80                      | 0.75                     | 1.21                   | 0.74                      | 0.75                    | 1.50                      | 1.34                    | 0.88                                                      | 0.04                                         | 0.69                                        |
| T8B.M046          | Blautia sp. OM07-19                 | 0.39                                                         | 0.99                     | 0.55                        | 1.11                      | -0.06                       | 0.17                      | 1.06                     | 1.39                   | 1.24                      | 1.22                    | 0.62                      | 0.96                    | 0.99                                                      | 0.03                                         | 0.08                                        |
| T17B.M018         | Ruminococcus sp. AF37-6AT           | 0.74                                                         | 1.11                     | 0.48                        | 0.99                      | 0.44                        | 0.15                      | 1.26                     | 1.13                   | 1.73                      | 1.10                    | 1.53                      | 0.82                    | 0.99                                                      | 0.03                                         | 0.02                                        |
| T5B.M042          | Clostridium sp. AM28-20LB           | 1.00                                                         | 1.01                     | 1.04                        | 1.54                      | 0.85                        | 1.03                      | 0.92                     | 0.96                   | 0.82                      | 0.76                    | 0.78                      | 0.63                    | 0.88                                                      | 0.05                                         | 0.99                                        |
| C13B.M008         | Blautia obeum                       | 1.57                                                         | 2.10                     | 1.94                        | 2.16                      | 1.37                        | 1.33                      | 1.09                     | 1.39                   | 1.29                      | 0.83                    | 1.37                      | 1.02                    | 0.99                                                      | 0.03                                         | 0.62                                        |
| C14C.M035         | uncultured Ruminococcus sp.         | -0.32                                                        | -0.18                    | -0.48                       | -0.09                     | -0.44                       | 0.85                      | 0.66                     | 1.04                   | 0.17                      | 1.05                    | 0.13                      | 1.60                    | 0.99                                                      | 0.07                                         | 0.05                                        |
| C1C.M051          | Coprococcus eutactus                | -0.23                                                        | -0.16                    | 0.45                        | 0.34                      | -0.04                       | 1.07                      | 0.57                     | 1.13                   | 1.31                      | 1.48                    | 0.96                      | 1.79                    | 0.88                                                      | 0.89                                         | 0.04                                        |
| T4C.M019          | Firmicutes bacterium CAG:83         | 0.81                                                         | 0.69                     | 0.51                        | 0.33                      | 0.75                        | -0.30                     | 1.17                     | 1.33                   | 0.98                      | 1.11                    | 1.47                      | 0.42                    | 0.88                                                      | 0.06                                         | 0.02                                        |
| T10B.M022         | Firmicutes bacterium AM10-47        | 0.22                                                         | 0.80                     | 0.37                        | 0.28                      | 0.00                        | -0.11                     | 1.01                     | 1.12                   | 1.05                      | 0.79                    | 0.73                      | 0.75                    | 0.88                                                      | 0.89                                         | 0.02                                        |
| T4C.M040          | uncultured Eubacterium sp.          | 0.29                                                         | 0.79                     | 0.38                        | 0.14                      | 0.47                        | 0.11                      | 0.85                     | 0.96                   | 1.08                      | 0.73                    | 1.01                      | 0.87                    | 0.07                                                      | 0.91                                         | 0.05                                        |

| Differential SGBs |                                | Result statistics (Centered Log-ratio transformed abundance) |                          |                             |                           |                             |                           |                          |                        |                           |                         |                           |                         | Comparison between probiotic and placebo groups at different time points |                                                |                                                |
|-------------------|--------------------------------|--------------------------------------------------------------|--------------------------|-----------------------------|---------------------------|-----------------------------|---------------------------|--------------------------|------------------------|---------------------------|-------------------------|---------------------------|-------------------------|--------------------------------------------------------------------------|------------------------------------------------|------------------------------------------------|
|                   |                                |                                                              |                          |                             |                           |                             |                           |                          |                        |                           |                         |                           |                         | Corrected P-value, Wilcoxon-test                                         |                                                |                                                |
| SGB ID            | Probiotic group day 0 taxonomy | Mean Probiotic group day 0                                   | Mean Placebo group day 0 | Mean Probiotic group day 30 | Mean Placebo group day 30 | Mean Probiotic group day 90 | Mean Placebo group day 90 | SD Probiotic group day 0 | SD Placebo group day 0 | SD Probiotic group day 30 | SD Placebo group day 30 | SD Probiotic group day 90 | SD Placebo group day 90 | Probiotic group day 0 vs Placebo group day 0                             | Probiotic group day 30 vs Placebo group day 30 | Probiotic group day 90 vs Placebo group day 90 |
| C12A.M023         | Bifidobacterium longum         | 0.65                                                         | 0.67                     | 0.82                        | 0.30                      | 0.83                        | -0.24                     | 1.78                     | 1.58                   | 1.37                      | 1.15                    | 1.57                      | 0.62                    | 0.91                                                                     | 0.92                                           | 0.01                                           |
| T2B.M023          | Prevotella sp. CAG:255         | 0.28                                                         | -0.16                    | 0.26                        | 0.04                      | 0.42                        | -0.44                     | 1.71                     | 1.40                   | 1.60                      | 1.50                    | 1.87                      | 0.32                    | 0.99                                                                     | 0.93                                           | 0.04                                           |
| C8C.M022          | Clostridiales bacterium        | 0.65                                                         | 1.60                     | 0.34                        | 0.73                      | 0.08                        | 1.23                      | 1.52                     | 1.53                   | 1.34                      | 1.27                    | 1.20                      | 1.58                    | 0.95                                                                     | 0.93                                           | 0.05                                           |

Table S7. Distribution of species-level genome bins (SGBs) and predicted metabolic modules across different phyla

| Module ID | Annotation                                  | Total number of SGBs | Percentage (%) | Actinobacteria | Bacteroidetes | Cyanobacteria | Euryarchaeota | Firmicutes | Fusobacteria | Melainabacteria | Proteobacteria | Tenericutes | Verrucomicrobia |
|-----------|---------------------------------------------|----------------------|----------------|----------------|---------------|---------------|---------------|------------|--------------|-----------------|----------------|-------------|-----------------|
| GMM010    | Butyrate synthesis I                        | 108                  | 27.76          | 0              | 39            | 0             | 0             | 66         | 2            | 0               | 1              | 0           | 0               |
| GMM033    | Melatonin synthesis                         | 23                   | 5.91           | 8              | 0             | 0             | 0             | 10         | 0            | 0               | 5              | 0           | 0               |
| GMM011    | Butyrate synthesis II                       | 3                    | 0.77           | 0              | 0             | 0             | 0             | 3          | 0            | 0               | 0              | 0           | 0               |
| GMM012    | Isovaleric acid synthesis I (KADH pathway)  | 2                    | 0.51           | 0              | 1             | 0             | 0             | 1          | 0            | 0               | 0              | 0           | 0               |
| GMM013    | Isovaleric acid synthesis II (KADC pathway) | 110                  | 28.28          | 12             | 10            | 0             | 0             | 82         | 0            | 0               | 6              | 0           | 0               |
| GMM014    | Secondary bile acid biosynthesis            | 15                   | 3.86           | 0              | 6             | 0             | 0             | 5          | 4            | 0               | 0              | 0           | 0               |
| GMM036    | GABA synthesis I                            | 3                    | 0.77           | 0              | 0             | 0             | 0             | 0          | 0            | 0               | 3              | 0           | 0               |
| GMM015    | Secondary bile acid biosynthesis            | 18                   | 4.63           | 0              | 1             | 0             | 0             | 17         | 0            | 0               | 0              | 0           | 0               |
| GMM037    | GABA synthesis II                           | 4                    | 1.03           | 0              | 0             | 0             | 0             | 0          | 0            | 0               | 4              | 0           | 0               |
| GMM038    | GABA synthesis III                          | 41                   | 10.54          | 3              | 34            | 0             | 0             | 0          | 1            | 0               | 1              | 0           | 2               |
| GMM039    | GABA degradation                            | 45                   | 11.57          | 2              | 1             | 0             | 0             | 37         | 0            | 0               | 5              | 0           | 0               |
| GMM030    | Quinolinic acid degradation                 | 361                  | 92.80          | 15             | 53            | 1             | 1             | 263        | 5            | 1               | 20             | 0           | 2               |
| GMM031    | Serotonin synthesis I                       | 5                    | 1.29           | 0              | 0             | 0             | 0             | 5          | 0            | 0               | 0              | 0           | 0               |
| GMM018    | PUFAs synthesis (AA, EPA, DHA)              | 167                  | 42.93          | 0              | 28            | 0             | 0             | 118        | 3            | 0               | 18             | 0           | 0               |
| GMM019    | Histamine synthesis                         | 4                    | 1.03           | 0              | 2             | 0             | 0             | 0          | 2            | 0               | 0              | 0           | 0               |
| GMM021    | Tryptophan synthesis                        | 35                   | 9.00           | 0              | 0             | 0             | 0             | 24         | 0            | 0               | 9              | 0           | 2               |
| GMM022    | Tryptophan degradation                      | 46                   | 11.83          | 0              | 21            | 0             | 0             | 22         | 0            | 0               | 1              | 0           | 2               |
| GMM001    | Acetate synthesis I                         | 368                  | 94.60          | 15             | 53            | 0             | 0             | 276        | 5            | 0               | 14             | 3           | 2               |
| GMM002    | Acetate synthesis II                        | 1                    | 0.26           | 0              | 0             | 0             | 0             | 1          | 0            | 0               | 0              | 0           | 0               |
| GMM003    | Acetate synthesis III                       | 25                   | 6.43           | 0              | 6             | 1             | 0             | 16         | 0            | 1               | 0              | 0           | 1               |
| GMM005    | Acetate degradation                         | 97                   | 24.94          | 1              | 37            | 0             | 1             | 52         | 0            | 0               | 6              | 0           | 0               |
| GMM006    | Propionate synthesis I                      | 2                    | 0.51           | 0              | 0             | 0             | 0             | 0          | 0            | 0               | 2              | 0           | 0               |
| GMM040    | Menaquinone synthesis (vitamin K2) I        | 50                   | 12.85          | 3              | 36            | 0             | 0             | 3          | 0            | 0               | 6              | 0           | 2               |
| GMM041    | Menaquinone synthesis (vitamin K2) II       | 10                   | 2.57           | 0              | 8             | 0             | 0             | 0          | 0            | 0               | 2              | 0           | 0               |
| GMM020    | Histamine degradation                       | 3                    | 0.77           | 0              | 0             | 0             | 0             | 0          | 0            | 0               | 3              | 0           | 0               |
| GMM007    | Propionate synthesis II                     | 43                   | 11.05          | 0              | 0             | 0             | 0             | 37         | 4            | 0               | 2              | 0           | 0               |
| GMM008    | Propionate synthesis III                    | 56                   | 14.40          | 0              | 44            | 0             | 0             | 10         | 0            | 0               | 0              | 0           | 2               |
| GMM009    | Propionate degradation I                    | 2                    | 0.51           | 0              | 0             | 0             | 0             | 0          | 0            | 0               | 2              | 0           | 0               |

Table S8. Significant differential serum metabolites identified between the probiotic and placebo groups

| Differential metabolites | Between the probiotic and placebo groups |                          |                             |                           |                             |                           |                          |                        |                           |                         |                           |                         | Corrected P-value, Wilcoxon                  |                                                |                                                |
|--------------------------|------------------------------------------|--------------------------|-----------------------------|---------------------------|-----------------------------|---------------------------|--------------------------|------------------------|---------------------------|-------------------------|---------------------------|-------------------------|----------------------------------------------|------------------------------------------------|------------------------------------------------|
|                          | Mean Probiotic group day 0               | Mean Placebo group day 0 | Mean Probiotic group day 30 | Mean Placebo group day 30 | Mean Probiotic group day 90 | Mean Placebo group day 90 | SD Probiotic group day 0 | SD Placebo group day 0 | SD Probiotic group day 30 | SD Placebo group day 30 | SD Probiotic group day 90 | SD Placebo group day 90 | Probiotic group day 0 vs Placebo group day 0 | Probiotic group day 30 vs Placebo group day 30 | Probiotic group day 90 vs Placebo group day 90 |
| sebacate                 | 0.00011                                  | 0.00014                  | 0.00011                     | 0.00013                   | 0.00010                     | 0.00012                   | 0.000032                 | 0.000037               | 0.000029                  | 0.000031                | 0.000029                  | 0.000021                | 0.91                                         | 0.04                                           | 0.10                                           |
| adrenic acid             | 0.00005                                  | 0.00005                  | 0.00005                     | 0.00004                   | 0.00005                     | 0.00005                   | 0.000019                 | 0.000011               | 0.000013                  | 0.000009                | 0.000016                  | 0.000014                | 0.99                                         | 0.04                                           | 0.78                                           |
| urobilin                 | 0.00063                                  | 0.00098                  | 0.00056                     | 0.00089                   | 0.00055                     | 0.00057                   | 0.000481                 | 0.000500               | 0.000328                  | 0.000333                | 0.000360                  | 0.000260                | 0.86                                         | 0.03                                           | 0.86                                           |
| linoleoyl ethanolamide   | 0.00043                                  | 0.00038                  | 0.00040                     | 0.00034                   | 0.00039                     | 0.00033                   | 0.000118                 | 0.000084               | 0.000084                  | 0.000120                | 0.000075                  | 0.000052                | 0.73                                         | 0.03                                           | 0.03                                           |
| C18.0e.MAG               | 0.00006                                  | 0.00006                  | 0.00006                     | 0.00005                   | 0.00006                     | 0.00006                   | 0.000010                 | 0.000009               | 0.000007                  | 0.000006                | 0.000009                  | 0.000006                | 0.99                                         | 0.02                                           | 0.39                                           |
| C18.1 cholesterol ester  | 0.00011                                  | 0.00010                  | 0.00011                     | 0.00010                   | 0.00011                     | 0.00011                   | 0.000015                 | 0.000013               | 0.000010                  | 0.000007                | 0.000014                  | 0.000010                | 0.91                                         | 0.05                                           | 0.83                                           |
| C18.0.SM                 | 0.00003                                  | 0.00002                  | 0.00003                     | 0.00003                   | 0.00003                     | 0.00003                   | 0.000003                 | 0.000003               | 0.000002                  | 0.000002                | 0.000003                  | 0.000003                | 0.95                                         | 0.03                                           | 0.92                                           |
| erythronic acid          | 0.00012                                  | 0.00011                  | 0.00012                     | 0.00010                   | 0.00012                     | 0.00011                   | 0.000028                 | 0.000026               | 0.000022                  | 0.000020                | 0.000028                  | 0.000018                | 0.99                                         | 0.05                                           | 0.27                                           |
| methyladipate.pimelate   | 0.00006                                  | 0.00010                  | 0.00006                     | 0.00009                   | 0.00005                     | 0.00006                   | 0.000059                 | 0.000078               | 0.000058                  | 0.000056                | 0.000040                  | 0.000048                | 0.81                                         | 0.03                                           | 0.39                                           |
| azelaic acid             | 0.00005                                  | 0.00006                  | 0.00005                     | 0.00006                   | 0.00005                     | 0.00005                   | 0.000012                 | 0.000010               | 0.000008                  | 0.000008                | 0.000011                  | 0.000008                | 0.89                                         | 0.03                                           | 0.77                                           |
| N acetylglutamate        | 0.00026                                  | 0.00030                  | 0.00024                     | 0.00028                   | 0.00024                     | 0.00025                   | 0.000082                 | 0.000064               | 0.000062                  | 0.000049                | 0.000066                  | 0.000045                | 0.65                                         | 0.03                                           | 0.86                                           |
| pseudouridine            | 0.00005                                  | 0.00005                  | 0.00005                     | 0.00005                   | 0.00005                     | 0.00005                   | 0.000004                 | 0.000005               | 0.000004                  | 0.000005                | 0.000005                  | 0.000005                | 0.91                                         | 0.02                                           | 0.32                                           |
| N acetylglutamic.acid    | 0.00006                                  | 0.00007                  | 0.00006                     | 0.00007                   | 0.00006                     | 0.00006                   | 0.000020                 | 0.000013               | 0.000016                  | 0.000011                | 0.000015                  | 0.000011                | 0.91                                         | 0.02                                           | 0.89                                           |

Table S9. Sixteen potential differential serum metabolites identified by LC-MS

| Serum Metabolites              |                                |                                   | VIP Score                                            |                                                      | Signal intensity           |                          |                             |                           |                             |                           |                          |                        |                           |                         |                           |                         | Corrected P-value, Wilcoxon-test             |                                                |                                               |
|--------------------------------|--------------------------------|-----------------------------------|------------------------------------------------------|------------------------------------------------------|----------------------------|--------------------------|-----------------------------|---------------------------|-----------------------------|---------------------------|--------------------------|------------------------|---------------------------|-------------------------|---------------------------|-------------------------|----------------------------------------------|------------------------------------------------|-----------------------------------------------|
| MeProbiotic group day 0bolites | AnnoProbiotic group day 0tion  | ChemiPlacebo group day 0l formula | VIP (Probiotic group day 30 vs Placebo group day 30) | VIP (Probiotic group day 90 vs Placebo group day 90) | Mean Probiotic group day 0 | Mean Placebo group day 0 | Mean Probiotic group day 30 | Mean Placebo group day 30 | Mean Probiotic group day 90 | Mean Placebo group day 90 | SD Probiotic group day 0 | SD Placebo group day 0 | SD Probiotic group day 30 | SD Placebo group day 30 | SD Probiotic group day 90 | SD Placebo group day 90 | Probiotic group day 0 vs Placebo group day 0 | Probiotic group day 30 vs Placebo group day 30 | Probiotic group day 90vs Placebo group day 90 |
| 10.50_448.3062m/z              | cis-5-Tetradecenoylcarnitine   | C21H39N1O4                        | 4.20                                                 | 2.32                                                 | 330.26                     | 150.61                   | 64.02                       | 252.45                    | 121.03                      | 192.72                    | 81.39                    | 72.31                  | 80.94                     | 60.56                   | 66.72                     | 41.36                   | 0.240                                        | 0.14                                           | 0.92                                          |
| 10.25_397.0485m/z              | myricetin                      | C15H10O8                          | 2.13                                                 | 2.52                                                 | 211.59                     | 179.03                   | 220.22                      | 166.89                    | 193.81                      | 151.34                    | 89.16                    | 57.91                  | 80.31                     | 62.81                   | 38.57                     | 68.24                   | 0.560                                        | 0.23                                           | 0.23                                          |
| 10.52_464.3008m/z              | O-linoleoylcarnitine           | C25H45N1O4                        | 2.48                                                 | 2.49                                                 | 123.89                     | 76.17                    | 49.75                       | 81.99                     | 63.02                       | 258.29                    | 72.81                    | 41.46                  | 69.66                     | 26.41                   | 48.02                     | 57.34                   | 0.510                                        | 0.08                                           | 0.18                                          |
| 14.64_239.0681m/z              | succinic acid                  | C4H6O4                            | 2.92                                                 | 6.64                                                 | 136.03                     | 172.96                   | 62.40                       | 160.69                    | 53.50                       | 8.14                      | 46.21                    | 96.00                  | 51.31                     | 97.71                   | 72.93                     | 108.39                  | 0.100                                        | 0.02                                           | <0.001                                        |
| 13.60_477.253m/z               | Retinoic acid                  | C20H28O2                          | 2.12                                                 | 2.91                                                 | 84.93                      | 86.27                    | 65.26                       | 153.51                    | 148.99                      | 93.74                     | 260.39                   | 139.49                 | 297.06                    | 158.46                  | 176.28                    | 270.20                  | 0.400                                        | 0.08                                           | 0.08                                          |
| 2.34_279.1724m/z               | 5-Dodecenoic acid              | C12H22O2                          | 2.67                                                 | 2.39                                                 | 248.33                     | 235.94                   | 252.61                      | 132.58                    | 225.09                      | 134.04                    | 425.75                   | 170.67                 | 60.40                     | 263.88                  | 107.85                    | 228.67                  | 0.920                                        | 0.002                                          | 0.02                                          |
| 12.58_583.2535m/z              | Schisanhenol                   | C23H30O6                          | 3.42                                                 | 3.91                                                 | 74.31                      | 73.61                    | 62.33                       | 182.99                    | 45.03                       | 108.33                    | 153.98                   | 88.04                  | 56.05                     | 70.85                   | 56.02                     | 341.62                  | 0.860                                        | 0.003                                          | 0.005                                         |
| 11.59_373.2735m/z              | Sphingomyelin (d18:0/16:1(9Z)) | C39H79N2O6P1                      | 2.38                                                 | 3.54                                                 | 97.50                      | 129.26                   | 48.73                       | 185.60                    | 320.73                      | 111.04                    | 42.64                    | 198.71                 | 0.00                      | 65.89                   | 32.08                     | 157.87                  | 0.540                                        | 0.01                                           | 0.02                                          |

|                       |                            |                |      |      |        |        |        |        |        |        |        |        |        |        |        |        |       |        |       |
|-----------------------|----------------------------|----------------|------|------|--------|--------|--------|--------|--------|--------|--------|--------|--------|--------|--------|--------|-------|--------|-------|
| 1.14_386.20<br>54m/z  | Enterodiol                 | C18H22O4       | 2.16 | 2.43 | 137.06 | 93.92  | 134.03 | 73.97  | 105.85 | 57.29  | 124.77 | 159.63 | 25.33  | 148.42 | 392.48 | 107.92 | 0.080 | 0.04   | 0.05  |
| 2.44_277.07<br>09m/z  | Syringic acid              | C9H10O5        | 2.38 | 4.77 | 87.95  | 69.98  | 154.20 | 243.06 | 263.01 | 96.24  | 96.58  | 121.15 | 28.35  | 199.96 | 286.72 | 76.92  | 0.260 | 0.02   | 0.001 |
| 10.14_448.1<br>456m/z | L-tryptophan               | C11H12N2<br>O2 | 2.66 | 3.48 | 162.59 | 104.57 | 189.59 | 97.05  | 190.49 | 116.33 | 117.64 | 85.52  | 126.75 | 130.52 | 122.31 | 27.84  | 0.061 | 0.002  | 0.001 |
| 11.73_432.1<br>418n   | Prostaglandin E2           | C20H32O5       | 2.09 | 4.68 | 137.54 | 115.57 | 195.39 | 135.21 | 117.76 | 29.27  | 73.13  | 61.26  | 37.49  | 127.79 | 57.97  | 114.25 | 0.440 | 0.17   | 0.01  |
| 10.14_512.1<br>644n   | 1178-24-1                  | C22H24O9       | 3.30 | 2.86 | 129.02 | 78.07  | 141.51 | 55.30  | 129.57 | 82.86  | 67.97  | 56.34  | 63.87  | 135.38 | 88.84  | 105.33 | 0.020 | <0.001 | 0.01  |
| 11.15_447.2<br>97n    | Tetracosanoic acid         | C24H48O2       | 9.65 | 2.27 | 83.78  | 179.80 | 0.00   | 91.38  | 55.32  | 191.53 | 88.64  | 98.26  | 40.17  | 115.13 | 31.58  | 6.10   | 0.160 | <0.001 | 0.03  |
| 10.31_322.1<br>922m/z | 3-Methylglutaryl carnitine | C13H23N1<br>O6 | 2.30 | 2.27 | 476.53 | 401.36 | 584.36 | 352.73 | 395.05 | 597.97 | 96.05  | 117.34 | 118.61 | 40.45  | 119.36 | 62.60  | 0.800 | 0.03   | 0.03  |
| 11.58_408.2<br>866n   | 1-Palmitoyl-rac-glycerol   | C19H38O4       | 2.47 | 3.84 | 133.82 | 156.35 | 38.85  | 129.08 | 398.58 | 118.06 | 46.46  | 40.75  | 95.84  | 100.24 | 137.18 | 66.15  | 0.950 | 0.06   | 0.03  |



Table S10. Viral operational taxonomic units (vOTUs) sequences and assembly statistics

| Sample ID               | Phage statistics    |            |             |            |                |              |
|-------------------------|---------------------|------------|-------------|------------|----------------|--------------|
|                         | Contig length (kbp) | Gene count | Viral genes | Host genes | Checkv quality | Completeness |
| Sample_C10A_k141_138972 | 90197               | 85         | 1           | 44         | High-quality   | 100          |
| Sample_C10A_k141_108304 | 143968              | 137        | 1           | 67         | High-quality   | 100          |
| Sample_C10A_k141_48221  | 125630              | 125        | 1           | 74         | High-quality   | 100          |
| Sample_C10A_k141_256565 | 179066              | 167        | 1           | 129        | High-quality   | 100          |
| Sample_C10A_k141_194585 | 5735                | 8          | 1           | 0          | High-quality   | 100          |
| Sample_C10A_k141_203515 | 55218               | 64         | 0           | 14         | Complete       | 100          |
| Sample_C10B_k141_55409  | 609179              | 509        | 3           | 361        | High-quality   | 100          |
| Sample_C10B_k141_141183 | 189004              | 182        | 5           | 114        | High-quality   | 100          |
| Sample_C10B_k141_125779 | 274513              | 229        | 4           | 137        | High-quality   | 100          |
| Sample_C10B_k141_25163  | 5623                | 11         | 0           | 0          | High-quality   | 100          |
| Sample_C10C_k141_142102 | 116130              | 103        | 1           | 65         | High-quality   | 100          |
| Sample_C10C_k141_214621 | 31359               | 31         | 0           | 4          | High-quality   | 100          |
| Sample_C10C_k141_215026 | 145948              | 131        | 1           | 109        | High-quality   | 100          |
| Sample_C10C_k141_193447 | 179862              | 154        | 1           | 106        | High-quality   | 100          |
| Sample_C10C_k141_80166  | 110316              | 102        | 1           | 52         | High-quality   | 100          |
| Sample_C10C_k141_22295  | 110515              | 79         | 1           | 45         | High-quality   | 100          |
| Sample_C11A_k141_2792   | 58829               | 66         | 1           | 31         | High-quality   | 100          |
| Sample_C11A_k141_78808  | 9714                | 11         | 1           | 3          | High-quality   | 100          |
| Sample_C11A_k141_154236 | 237286              | 186        | 1           | 119        | High-quality   | 100          |
| Sample_C11A_k141_117896 | 336576              | 252        | 1           | 179        | High-quality   | 100          |
| Sample_C11A_k141_81884  | 218928              | 200        | 1           | 130        | High-quality   | 100          |
| Sample_C11B_k141_31112  | 169509              | 136        | 16          | 94         | High-quality   | 100          |
| Sample_C11B_k141_6618   | 165045              | 168        | 1           | 78         | High-quality   | 100          |
| Sample_C11B_k141_57344  | 7019                | 8          | 1           | 2          | High-quality   | 100          |
| Sample_C11B_k141_233397 | 271756              | 227        | 2           | 167        | High-quality   | 100          |
| Sample_C11B_k141_239259 | 343476              | 346        | 3           | 249        | High-quality   | 100          |
| Sample_C11B_k141_169624 | 63105               | 63         | 1           | 16         | High-quality   | 100          |
| Sample_C11C_k141_133932 | 340905              | 262        | 1           | 182        | High-quality   | 100          |
| Sample_C11C_k141_59629  | 549161              | 388        | 1           | 250        | High-quality   | 100          |
| Sample_C11C_k141_49175  | 706417              | 527        | 1           | 366        | High-quality   | 100          |
| Sample_C11C_k141_68261  | 564923              | 470        | 1           | 346        | High-quality   | 100          |
| Sample_C11C_k141_145003 | 701636              | 615        | 1           | 476        | High-quality   | 100          |
| Sample_C12A_k141_22399  | 270004              | 253        | 3           | 138        | High-quality   | 100          |
| Sample_C12A_k141_161947 | 261033              | 256        | 1           | 177        | High-quality   | 100          |

|                         |        |     |    |     |              |     |
|-------------------------|--------|-----|----|-----|--------------|-----|
| Sample_C12A_k141_97033  | 404922 | 392 | 2  | 251 | High-quality | 100 |
| Sample_C12B_k141_167146 | 242945 | 203 | 1  | 150 | High-quality | 100 |
| Sample_C12B_k141_114343 | 293533 | 260 | 4  | 181 | High-quality | 100 |
| Sample_C12B_k141_202227 | 6251   | 9   | 2  | 0   | Complete     | 100 |
| Sample_C12C_k141_144909 | 69542  | 67  | 1  | 44  | High-quality | 100 |
| Sample_C12C_k141_129714 | 210022 | 170 | 1  | 130 | High-quality | 100 |
| Sample_C12C_k141_227295 | 159149 | 132 | 3  | 63  | Complete     | 100 |
| Sample_C12C_k141_35184  | 207633 | 184 | 1  | 137 | High-quality | 100 |
| Sample_C12C_k141_188111 | 327561 | 262 | 1  | 163 | High-quality | 100 |
| Sample_C12C_k141_213286 | 275427 | 270 | 1  | 144 | High-quality | 100 |
| Sample_C13A_k141_13032  | 99355  | 106 | 1  | 62  | High-quality | 100 |
| Sample_C13A_k141_26915  | 289712 | 248 | 1  | 176 | High-quality | 100 |
| Sample_C13A_k141_100484 | 70516  | 73  | 10 | 23  | High-quality | 100 |
| Sample_C13A_k141_6605   | 70487  | 67  | 1  | 50  | High-quality | 100 |
| Sample_C13A_k141_46041  | 489148 | 433 | 3  | 315 | High-quality | 100 |
| Sample_C13C_k141_15292  | 74445  | 60  | 1  | 35  | High-quality | 100 |
| Sample_C13C_k141_71895  | 325734 | 279 | 1  | 202 | High-quality | 100 |
| Sample_C14C_k141_79190  | 229951 | 211 | 2  | 143 | High-quality | 100 |
| Sample_C1A_k141_6186    | 477185 | 448 | 5  | 276 | High-quality | 100 |
| Sample_C1A_k141_152452  | 295228 | 253 | 3  | 186 | High-quality | 100 |
| Sample_C1A_k141_77737   | 262925 | 263 | 2  | 205 | High-quality | 100 |
| Sample_C1B_k141_40809   | 344353 | 304 | 1  | 248 | High-quality | 100 |
| Sample_C1B_k141_15965   | 648307 | 516 | 1  | 411 | High-quality | 100 |
| Sample_C1C_k141_175795  | 456219 | 412 | 1  | 332 | High-quality | 100 |
| Sample_C1C_k141_156768  | 515294 | 340 | 1  | 252 | High-quality | 100 |
| Sample_C1C_k141_120693  | 118763 | 120 | 1  | 66  | High-quality | 100 |
| Sample_C1C_k141_178916  | 71932  | 53  | 1  | 38  | High-quality | 100 |
| Sample_C1C_k141_170835  | 237712 | 159 | 1  | 121 | High-quality | 100 |
| Sample_C1C_k141_154161  | 150919 | 129 | 1  | 82  | High-quality | 100 |
| Sample_C1C_k141_55759   | 179973 | 187 | 1  | 117 | High-quality | 100 |
| Sample_C2A_k141_2148    | 58614  | 64  | 1  | 33  | High-quality | 100 |
| Sample_C2A_k141_201050  | 172760 | 189 | 1  | 106 | High-quality | 100 |
| Sample_C2A_k141_143708  | 243300 | 231 | 2  | 155 | High-quality | 100 |
| Sample_C2A_k141_322474  | 265453 | 215 | 2  | 172 | High-quality | 100 |
| Sample_C2A_k141_197769  | 325961 | 302 | 1  | 246 | High-quality | 100 |
| Sample_C2B_k141_76325   | 150177 | 149 | 1  | 67  | High-quality | 100 |
| Sample_C2B_k141_284761  | 262896 | 234 | 2  | 140 | High-quality | 100 |
| Sample_C2B_k141_116891  | 591300 | 594 | 4  | 316 | High-quality | 100 |
| Sample_C2B_k141_19228   | 48937  | 55  | 0  | 24  | High-quality | 100 |

|                        |        |     |    |     |              |     |
|------------------------|--------|-----|----|-----|--------------|-----|
| Sample_C2B_k141_158930 | 114485 | 103 | 1  | 64  | High-quality | 100 |
| Sample_C2B_k141_309501 | 192495 | 131 | 1  | 95  | High-quality | 100 |
| Sample_C2C_k141_65504  | 395426 | 396 | 1  | 319 | High-quality | 100 |
| Sample_C2C_k141_226562 | 348974 | 363 | 3  | 234 | High-quality | 100 |
| Sample_C2C_k141_267130 | 443833 | 416 | 2  | 320 | High-quality | 100 |
| Sample_C2C_k141_210733 | 14018  | 22  | 2  | 4   | Complete     | 100 |
| Sample_C2C_k141_50758  | 26539  | 30  | 2  | 2   | High-quality | 100 |
| Sample_C2C_k141_181624 | 106773 | 113 | 1  | 56  | High-quality | 100 |
| Sample_C2C_k141_314636 | 93501  | 103 | 1  | 59  | High-quality | 100 |
| Sample_C2C_k141_157626 | 112637 | 132 | 2  | 60  | High-quality | 100 |
| Sample_C3A_k141_131742 | 208510 | 174 | 1  | 123 | High-quality | 100 |
| Sample_C3A_k141_60104  | 179600 | 155 | 1  | 106 | High-quality | 100 |
| Sample_C3A_k141_86444  | 369841 | 281 | 1  | 203 | High-quality | 100 |
| Sample_C3A_k141_87497  | 109816 | 75  | 1  | 51  | High-quality | 100 |
| Sample_C3A_k141_38683  | 324859 | 242 | 1  | 168 | High-quality | 100 |
| Sample_C3A_k141_94696  | 47310  | 74  | 12 | 1   | High-quality | 100 |
| Sample_C3B_k141_213481 | 172368 | 137 | 1  | 85  | High-quality | 100 |
| Sample_C3C_k141_28211  | 142683 | 150 | 2  | 72  | High-quality | 100 |
| Sample_C3C_k141_136716 | 477936 | 546 | 4  | 327 | High-quality | 100 |
| Sample_C3C_k141_171266 | 562487 | 617 | 4  | 378 | High-quality | 100 |
| Sample_C3C_k141_227275 | 601314 | 576 | 1  | 480 | High-quality | 100 |
| Sample_C3C_k141_199893 | 402943 | 374 | 1  | 294 | High-quality | 100 |
| Sample_C3C_k141_182680 | 361100 | 320 | 1  | 225 | High-quality | 100 |
| Sample_C4A_k141_26674  | 409593 | 358 | 2  | 265 | High-quality | 100 |
| Sample_C4A_k141_82383  | 56274  | 48  | 2  | 16  | High-quality | 100 |
| Sample_C4A_k141_61468  | 140443 | 154 | 7  | 77  | Complete     | 100 |
| Sample_C4A_k141_220594 | 296892 | 268 | 2  | 185 | High-quality | 100 |
| Sample_C4A_k141_18396  | 236366 | 194 | 1  | 130 | High-quality | 100 |
| Sample_C4A_k141_154973 | 187672 | 140 | 1  | 95  | High-quality | 100 |
| Sample_C4B_k141_108219 | 74061  | 69  | 1  | 56  | High-quality | 100 |
| Sample_C4B_k141_192562 | 192270 | 162 | 1  | 123 | High-quality | 100 |
| Sample_C4B_k141_90906  | 79879  | 77  | 1  | 44  | High-quality | 100 |
| Sample_C4B_k141_253004 | 158628 | 155 | 1  | 101 | High-quality | 100 |
| Sample_C4B_k141_172558 | 70618  | 72  | 1  | 47  | High-quality | 100 |
| Sample_C4B_k141_75716  | 83715  | 68  | 1  | 36  | High-quality | 100 |
| Sample_C4B_k141_101799 | 260949 | 242 | 1  | 195 | High-quality | 100 |
| Sample_C4C_k141_26966  | 321314 | 318 | 3  | 173 | High-quality | 100 |
| Sample_C4C_k141_238383 | 362370 | 321 | 1  | 254 | High-quality | 100 |
| Sample_C5A_k141_58954  | 5070   | 7   | 1  | 0   | High-quality | 100 |

|                        |        |     |   |     |              |     |
|------------------------|--------|-----|---|-----|--------------|-----|
| Sample_C5A_k141_177353 | 39814  | 38  | 0 | 21  | High-quality | 100 |
| Sample_C5A_k141_130903 | 88065  | 97  | 1 | 65  | High-quality | 100 |
| Sample_C5A_k141_13296  | 189944 | 173 | 2 | 134 | High-quality | 100 |
| Sample_C5B_k141_35482  | 810636 | 766 | 5 | 564 | High-quality | 100 |
| Sample_C5B_k141_58135  | 161166 | 147 | 1 | 112 | High-quality | 100 |
| Sample_C5C_k141_49338  | 27999  | 41  | 1 | 12  | High-quality | 100 |
| Sample_C5C_k141_14578  | 907762 | 810 | 6 | 622 | High-quality | 100 |
| Sample_C5C_k141_28799  | 452505 | 429 | 4 | 290 | High-quality | 100 |
| Sample_C5C_k141_103495 | 152589 | 132 | 1 | 103 | High-quality | 100 |
| Sample_C6A_k141_60782  | 87918  | 69  | 1 | 47  | High-quality | 100 |
| Sample_C6B_k141_112047 | 262409 | 216 | 2 | 152 | High-quality | 100 |
| Sample_C6B_k141_119019 | 184175 | 161 | 1 | 117 | High-quality | 100 |
| Sample_C6C_k141_53742  | 346974 | 355 | 4 | 204 | Complete     | 100 |
| Sample_C6C_k141_5379   | 291786 | 285 | 1 | 198 | High-quality | 100 |
| Sample_C6C_k141_81651  | 199475 | 196 | 1 | 109 | High-quality | 100 |
| Sample_C6C_k141_42621  | 338414 | 230 | 1 | 154 | High-quality | 100 |
| Sample_C6C_k141_192161 | 305221 | 251 | 1 | 173 | High-quality | 100 |
| Sample_C8A_k141_73723  | 577400 | 551 | 4 | 388 | High-quality | 100 |
| Sample_C8A_k141_94955  | 180157 | 137 | 1 | 94  | High-quality | 100 |
| Sample_C8A_k141_58309  | 19807  | 20  | 3 | 10  | High-quality | 100 |
| Sample_C8A_k141_149906 | 136063 | 149 | 1 | 21  | Complete     | 100 |
| Sample_C8A_k141_3432   | 589334 | 578 | 4 | 385 | High-quality | 100 |
| Sample_C8A_k141_100037 | 319725 | 308 | 1 | 235 | High-quality | 100 |
| Sample_C8B_k141_160293 | 85246  | 67  | 1 | 33  | High-quality | 100 |
| Sample_C8B_k141_120934 | 135058 | 125 | 1 | 91  | High-quality | 100 |
| Sample_C8B_k141_207778 | 11477  | 17  | 0 | 1   | Complete     | 100 |
| Sample_C8C_k141_143075 | 29665  | 36  | 3 | 3   | High-quality | 100 |
| Sample_C8C_k141_125805 | 264937 | 226 | 1 | 170 | High-quality | 100 |
| Sample_C8C_k141_3097   | 192288 | 162 | 1 | 93  | High-quality | 100 |
| Sample_C8C_k141_21407  | 544217 | 442 | 1 | 295 | High-quality | 100 |
| Sample_C8C_k141_40639  | 476756 | 408 | 1 | 317 | High-quality | 100 |
| Sample_C8C_k141_131694 | 301878 | 278 | 1 | 171 | High-quality | 100 |
| Sample_C8C_k141_134343 | 172933 | 175 | 1 | 116 | High-quality | 100 |
| Sample_C8C_k141_136297 | 179016 | 141 | 1 | 105 | High-quality | 100 |
| Sample_C8C_k141_64766  | 383477 | 302 | 3 | 210 | High-quality | 100 |
| Sample_C8C_k141_16985  | 306301 | 234 | 1 | 154 | High-quality | 100 |
| Sample_C8C_k141_106285 | 201859 | 202 | 2 | 158 | High-quality | 100 |
| Sample_C9A_k141_68640  | 500387 | 398 | 3 | 320 | High-quality | 100 |
| Sample_C9A_k141_98058  | 232904 | 180 | 1 | 128 | High-quality | 100 |

|                         |        |     |    |     |              |     |
|-------------------------|--------|-----|----|-----|--------------|-----|
| Sample_C9A_k141_5966    | 395272 | 310 | 2  | 223 | High-quality | 100 |
| Sample_C9A_k141_90014   | 676169 | 580 | 1  | 429 | High-quality | 100 |
| Sample_C9A_k141_92638   | 43780  | 41  | 1  | 16  | High-quality | 100 |
| Sample_C9A_k141_105626  | 366947 | 246 | 1  | 191 | High-quality | 100 |
| Sample_C9B_k141_18064   | 287933 | 180 | 1  | 137 | High-quality | 100 |
| Sample_C9B_k141_55488   | 314428 | 261 | 1  | 177 | High-quality | 100 |
| Sample_C9C_k141_83008   | 414054 | 324 | 1  | 236 | High-quality | 100 |
| Sample_C9C_k141_10722   | 347165 | 263 | 2  | 199 | High-quality | 100 |
| Sample_C9C_k141_35940   | 262516 | 238 | 1  | 175 | High-quality | 100 |
| Sample_C9C_k141_15519   | 299062 | 260 | 1  | 190 | High-quality | 100 |
| Sample_T10A_k141_1263   | 40797  | 36  | 0  | 24  | High-quality | 100 |
| Sample_T10A_k141_124884 | 354262 | 285 | 11 | 193 | High-quality | 100 |
| Sample_T10A_k141_34010  | 370194 | 362 | 3  | 265 | High-quality | 100 |
| Sample_T10A_k141_184369 | 296025 | 203 | 1  | 140 | High-quality | 100 |
| Sample_T10A_k141_184457 | 10651  | 15  | 2  | 4   | Complete     | 100 |
| Sample_T10B_k141_136006 | 260032 | 236 | 1  | 182 | High-quality | 100 |
| Sample_T10B_k141_86246  | 55112  | 55  | 1  | 13  | High-quality | 100 |
| Sample_T10B_k141_88934  | 194609 | 180 | 1  | 117 | High-quality | 100 |
| Sample_T10B_k141_55634  | 496554 | 453 | 3  | 343 | High-quality | 100 |
| Sample_T11A_k141_107952 | 314887 | 282 | 5  | 192 | High-quality | 100 |
| Sample_T11A_k141_124706 | 317880 | 264 | 3  | 190 | High-quality | 100 |
| Sample_T11A_k141_17704  | 269244 | 194 | 1  | 136 | High-quality | 100 |
| Sample_T11A_k141_2552   | 305198 | 292 | 3  | 202 | High-quality | 100 |
| Sample_T11A_k141_50042  | 249890 | 213 | 1  | 156 | High-quality | 100 |
| Sample_T11A_k141_145237 | 379809 | 338 | 1  | 183 | High-quality | 100 |
| Sample_T11A_k141_7302   | 187698 | 204 | 1  | 70  | High-quality | 100 |
| Sample_T11A_k141_115926 | 181056 | 171 | 2  | 133 | High-quality | 100 |
| Sample_T11B_k141_114581 | 20919  | 28  | 1  | 5   | High-quality | 100 |
| Sample_T11B_k141_150680 | 160650 | 137 | 1  | 100 | High-quality | 100 |
| Sample_T11B_k141_137924 | 235965 | 189 | 1  | 143 | High-quality | 100 |
| Sample_T11B_k141_14501  | 7281   | 11  | 0  | 2   | High-quality | 100 |
| Sample_T11C_k141_73711  | 45421  | 39  | 1  | 11  | High-quality | 100 |
| Sample_T11C_k141_13423  | 359814 | 303 | 1  | 222 | High-quality | 100 |
| Sample_T12A_k141_40024  | 344909 | 282 | 1  | 195 | High-quality | 100 |
| Sample_T12A_k141_46083  | 20240  | 25  | 1  | 3   | High-quality | 100 |
| Sample_T12A_k141_340991 | 138045 | 145 | 1  | 77  | High-quality | 100 |
| Sample_T12B_k141_137132 | 41904  | 40  | 1  | 11  | High-quality | 100 |
| Sample_T12B_k141_178670 | 564984 | 505 | 2  | 377 | High-quality | 100 |
| Sample_T12B_k141_72850  | 190627 | 171 | 1  | 120 | High-quality | 100 |

|                         |        |     |    |     |              |     |
|-------------------------|--------|-----|----|-----|--------------|-----|
| Sample_T12C_k141_177251 | 11570  | 11  | 3  | 2   | High-quality | 100 |
| Sample_T12C_k141_169558 | 333788 | 269 | 1  | 188 | High-quality | 100 |
| Sample_T12C_k141_13986  | 175579 | 188 | 1  | 123 | High-quality | 100 |
| Sample_T12C_k141_191073 | 304703 | 249 | 1  | 183 | High-quality | 100 |
| Sample_T12C_k141_155620 | 179379 | 135 | 1  | 99  | High-quality | 100 |
| Sample_T13A_k141_79882  | 565961 | 455 | 2  | 343 | High-quality | 100 |
| Sample_T13A_k141_28090  | 63003  | 69  | 2  | 20  | High-quality | 100 |
| Sample_T13A_k141_108489 | 427150 | 406 | 1  | 304 | High-quality | 100 |
| Sample_T13A_k141_110821 | 223347 | 169 | 1  | 120 | High-quality | 100 |
| Sample_T13A_k141_74588  | 146473 | 135 | 1  | 82  | High-quality | 100 |
| Sample_T13B_k141_111338 | 535180 | 391 | 3  | 287 | High-quality | 100 |
| Sample_T13B_k141_37988  | 321473 | 260 | 1  | 202 | High-quality | 100 |
| Sample_T13B_k141_130065 | 381714 | 275 | 1  | 157 | High-quality | 100 |
| Sample_T13B_k141_38196  | 252338 | 191 | 1  | 126 | High-quality | 100 |
| Sample_T13B_k141_149892 | 306601 | 285 | 2  | 216 | High-quality | 100 |
| Sample_T13B_k141_76154  | 128847 | 129 | 6  | 27  | High-quality | 100 |
| Sample_T13B_k141_97853  | 249588 | 226 | 2  | 129 | High-quality | 100 |
| Sample_T13B_k141_159054 | 403857 | 335 | 1  | 254 | High-quality | 100 |
| Sample_T13B_k141_179570 | 333451 | 322 | 3  | 245 | High-quality | 100 |
| Sample_T13B_k141_86651  | 115163 | 115 | 1  | 57  | High-quality | 100 |
| Sample_T13B_k141_166007 | 328139 | 325 | 1  | 250 | High-quality | 100 |
| Sample_T13C_k141_134514 | 285409 | 247 | 2  | 147 | High-quality | 100 |
| Sample_T13C_k141_5043   | 209463 | 200 | 1  | 125 | High-quality | 100 |
| Sample_T14A_k141_240234 | 225140 | 201 | 3  | 110 | High-quality | 100 |
| Sample_T14B_k141_106966 | 37891  | 37  | 1  | 17  | High-quality | 100 |
| Sample_T14B_k141_218812 | 6861   | 8   | 0  | 0   | Complete     | 100 |
| Sample_T14C_k141_66626  | 820226 | 681 | 3  | 469 | High-quality | 100 |
| Sample_T14C_k141_121639 | 252707 | 245 | 3  | 176 | High-quality | 100 |
| Sample_T14C_k141_12876  | 78394  | 91  | 1  | 26  | High-quality | 100 |
| Sample_T15B_k141_98005  | 175695 | 163 | 1  | 121 | High-quality | 100 |
| Sample_T15C_k141_76753  | 265578 | 196 | 2  | 150 | High-quality | 100 |
| Sample_T15C_k141_78243  | 417654 | 361 | 6  | 252 | High-quality | 100 |
| Sample_T15C_k141_52156  | 83743  | 86  | 2  | 43  | High-quality | 100 |
| Sample_T15C_k141_82737  | 268050 | 240 | 3  | 141 | High-quality | 100 |
| Sample_T16B_k141_59827  | 194457 | 189 | 1  | 93  | High-quality | 100 |
| Sample_T16B_k141_173991 | 603995 | 500 | 1  | 358 | High-quality | 100 |
| Sample_T16C_k141_123619 | 127459 | 117 | 1  | 90  | High-quality | 100 |
| Sample_T16C_k141_65004  | 94418  | 112 | 20 | 28  | High-quality | 100 |
| Sample_T16C_k141_96566  | 287542 | 265 | 1  | 205 | High-quality | 100 |

|                         |        |     |   |     |              |     |
|-------------------------|--------|-----|---|-----|--------------|-----|
| Sample_T16C_k141_40217  | 598372 | 511 | 3 | 318 | High-quality | 100 |
| Sample_T16C_k141_116315 | 235357 | 262 | 3 | 172 | High-quality | 100 |
| Sample_T17A_k141_27293  | 209384 | 186 | 1 | 102 | High-quality | 100 |
| Sample_T17A_k141_32922  | 286134 | 239 | 1 | 145 | High-quality | 100 |
| Sample_T17A_k141_47722  | 373909 | 278 | 1 | 214 | High-quality | 100 |
| Sample_T17B_k141_11617  | 272547 | 244 | 2 | 141 | High-quality | 100 |
| Sample_T17B_k141_4093   | 169299 | 158 | 3 | 90  | High-quality | 100 |
| Sample_T17B_k141_12484  | 190772 | 152 | 1 | 99  | High-quality | 100 |
| Sample_T17B_k141_2133   | 261351 | 225 | 1 | 160 | High-quality | 100 |
| Sample_T17B_k141_2816   | 82529  | 74  | 1 | 51  | High-quality | 100 |
| Sample_T17C_k141_36059  | 369566 | 342 | 1 | 283 | High-quality | 100 |
| Sample_T17C_k141_16855  | 431793 | 401 | 3 | 304 | High-quality | 100 |
| Sample_T18A_k141_118019 | 678232 | 641 | 2 | 478 | High-quality | 100 |
| Sample_T18B_k141_63392  | 402554 | 268 | 2 | 191 | High-quality | 100 |
| Sample_T18B_k141_64336  | 152027 | 127 | 3 | 88  | High-quality | 100 |
| Sample_T18C_k141_16652  | 431556 | 345 | 1 | 251 | High-quality | 100 |
| Sample_T18C_k141_2197   | 283257 | 235 | 1 | 164 | High-quality | 100 |
| Sample_T18C_k141_51396  | 159152 | 140 | 1 | 103 | High-quality | 100 |
| Sample_T18C_k141_116773 | 12668  | 18  | 1 | 1   | High-quality | 100 |
| Sample_T18C_k141_137172 | 273221 | 231 | 6 | 136 | High-quality | 100 |
| Sample_T1A_k141_37716   | 245323 | 208 | 1 | 170 | High-quality | 100 |
| Sample_T1C_k141_44118   | 132156 | 140 | 2 | 89  | High-quality | 100 |
| Sample_T2A_k141_195756  | 364799 | 360 | 1 | 292 | High-quality | 100 |
| Sample_T2A_k141_253531  | 433472 | 392 | 2 | 305 | High-quality | 100 |
| Sample_T2A_k141_114109  | 325004 | 315 | 1 | 267 | High-quality | 100 |
| Sample_T2A_k141_86349   | 618619 | 597 | 2 | 324 | High-quality | 100 |
| Sample_T2A_k141_89410   | 178283 | 191 | 2 | 117 | High-quality | 100 |
| Sample_T2A_k141_233154  | 574080 | 492 | 2 | 346 | High-quality | 100 |
| Sample_T2A_k141_233913  | 197311 | 199 | 1 | 102 | High-quality | 100 |
| Sample_T2A_k141_121999  | 283073 | 259 | 1 | 188 | High-quality | 100 |
| Sample_T2A_k141_97844   | 646320 | 494 | 3 | 373 | High-quality | 100 |
| Sample_T2A_k141_240908  | 583019 | 560 | 2 | 439 | High-quality | 100 |
| Sample_T2B_k141_101370  | 445085 | 453 | 1 | 244 | High-quality | 100 |
| Sample_T2B_k141_21406   | 7611   | 8   | 0 | 0   | Complete     | 100 |
| Sample_T2B_k141_25453   | 367674 | 404 | 2 | 247 | High-quality | 100 |
| Sample_T2C_k141_138961  | 89115  | 103 | 1 | 58  | High-quality | 100 |
| Sample_T2C_k141_58126   | 403550 | 300 | 1 | 214 | High-quality | 100 |
| Sample_T2C_k141_34343   | 299574 | 221 | 1 | 115 | High-quality | 100 |
| Sample_T2C_k141_92046   | 210162 | 186 | 3 | 151 | High-quality | 100 |

|                        |        |     |    |     |              |     |
|------------------------|--------|-----|----|-----|--------------|-----|
| Sample_T2C_k141_37492  | 104365 | 82  | 1  | 51  | High-quality | 100 |
| Sample_T2C_k141_232490 | 307023 | 244 | 1  | 166 | High-quality | 100 |
| Sample_T2C_k141_121167 | 208833 | 148 | 1  | 30  | High-quality | 100 |
| Sample_T2C_k141_263151 | 327383 | 314 | 2  | 203 | High-quality | 100 |
| Sample_T2C_k141_99810  | 119257 | 103 | 1  | 56  | High-quality | 100 |
| Sample_T2C_k141_186247 | 325643 | 323 | 4  | 191 | High-quality | 100 |
| Sample_T2C_k141_24894  | 118561 | 96  | 1  | 55  | High-quality | 100 |
| Sample_T2C_k141_277022 | 69971  | 85  | 2  | 12  | Complete     | 100 |
| Sample_T3A_k141_41905  | 182596 | 126 | 1  | 86  | High-quality | 100 |
| Sample_T3A_k141_42748  | 319955 | 265 | 1  | 190 | High-quality | 100 |
| Sample_T3A_k141_99571  | 289258 | 183 | 2  | 124 | High-quality | 100 |
| Sample_T3A_k141_89450  | 255361 | 222 | 5  | 127 | High-quality | 100 |
| Sample_T3A_k141_50663  | 313132 | 203 | 1  | 144 | High-quality | 100 |
| Sample_T3A_k141_120020 | 127202 | 125 | 1  | 75  | High-quality | 100 |
| Sample_T3A_k141_78011  | 380922 | 295 | 2  | 235 | High-quality | 100 |
| Sample_T3B_k141_154194 | 348944 | 278 | 1  | 177 | High-quality | 100 |
| Sample_T3B_k141_80617  | 325002 | 298 | 1  | 200 | High-quality | 100 |
| Sample_T3C_k141_59000  | 517161 | 371 | 1  | 277 | High-quality | 100 |
| Sample_T3C_k141_104046 | 260737 | 183 | 1  | 132 | High-quality | 100 |
| Sample_T3C_k141_60148  | 494179 | 460 | 1  | 369 | High-quality | 100 |
| Sample_T3C_k141_106726 | 149923 | 115 | 1  | 46  | High-quality | 100 |
| Sample_T3C_k141_54526  | 498947 | 464 | 2  | 293 | High-quality | 100 |
| Sample_T3C_k141_84106  | 301505 | 290 | 1  | 227 | High-quality | 100 |
| Sample_T4A_k141_39425  | 21966  | 25  | 1  | 13  | High-quality | 100 |
| Sample_T4A_k141_79090  | 144657 | 125 | 1  | 85  | High-quality | 100 |
| Sample_T4A_k141_43016  | 139867 | 121 | 1  | 22  | High-quality | 100 |
| Sample_T4A_k141_31143  | 162666 | 113 | 1  | 74  | High-quality | 100 |
| Sample_T4A_k141_94653  | 252008 | 267 | 2  | 162 | High-quality | 100 |
| Sample_T4B_k141_227527 | 112526 | 113 | 1  | 71  | High-quality | 100 |
| Sample_T4B_k141_195484 | 90021  | 105 | 1  | 75  | High-quality | 100 |
| Sample_T4B_k141_48248  | 22985  | 25  | 1  | 2   | High-quality | 100 |
| Sample_T4B_k141_163547 | 87666  | 86  | 1  | 50  | High-quality | 100 |
| Sample_T4B_k141_275846 | 212688 | 250 | 1  | 146 | High-quality | 100 |
| Sample_T4B_k141_243011 | 95686  | 93  | 1  | 63  | High-quality | 100 |
| Sample_T4B_k141_359473 | 132547 | 134 | 1  | 67  | High-quality | 100 |
| Sample_T4C_k141_39067  | 504869 | 355 | 1  | 235 | High-quality | 100 |
| Sample_T4C_k141_15258  | 101590 | 109 | 22 | 14  | High-quality | 100 |
| Sample_T4C_k141_53309  | 175928 | 109 | 1  | 73  | High-quality | 100 |
| Sample_T4C_k141_17794  | 277194 | 214 | 2  | 149 | High-quality | 100 |



|                        |        |     |    |     |              |     |
|------------------------|--------|-----|----|-----|--------------|-----|
| Sample_T4C_k141_72477  | 108673 | 98  | 1  | 65  | High-quality | 100 |
| Sample_T4C_k141_112769 | 215068 | 178 | 1  | 110 | High-quality | 100 |
| Sample_T5A_k141_42418  | 413129 | 394 | 2  | 224 | High-quality | 100 |
| Sample_T5A_k141_39775  | 375963 | 298 | 1  | 198 | High-quality | 100 |
| Sample_T5A_k141_14576  | 296015 | 223 | 1  | 129 | High-quality | 100 |
| Sample_T5A_k141_40545  | 173280 | 125 | 1  | 83  | High-quality | 100 |
| Sample_T5A_k141_45939  | 180640 | 168 | 1  | 96  | High-quality | 100 |
| Sample_T5A_k141_15638  | 6025   | 10  | 2  | 0   | High-quality | 100 |
| Sample_T5B_k141_41141  | 313284 | 223 | 1  | 158 | High-quality | 100 |
| Sample_T5B_k141_11416  | 155292 | 120 | 16 | 75  | High-quality | 100 |
| Sample_T5B_k141_79996  | 173776 | 167 | 1  | 93  | High-quality | 100 |
| Sample_T5B_k141_39913  | 139562 | 111 | 2  | 64  | High-quality | 100 |
| Sample_T5B_k141_32189  | 321829 | 231 | 1  | 180 | High-quality | 100 |
| Sample_T5B_k141_49131  | 540098 | 428 | 2  | 327 | High-quality | 100 |
| Sample_T5C_k141_21128  | 108818 | 104 | 2  | 49  | High-quality | 100 |
| Sample_T5C_k141_101497 | 318017 | 253 | 1  | 159 | High-quality | 100 |
| Sample_T5C_k141_61589  | 70268  | 78  | 1  | 39  | High-quality | 100 |
| Sample_T5C_k141_104078 | 534224 | 482 | 1  | 384 | High-quality | 100 |
| Sample_T5C_k141_109714 | 83289  | 74  | 1  | 38  | High-quality | 100 |
| Sample_T5C_k141_76010  | 203460 | 137 | 1  | 98  | High-quality | 100 |
| Sample_T6A_k141_223364 | 186648 | 175 | 1  | 128 | High-quality | 100 |
| Sample_T6A_k141_162924 | 97306  | 98  | 1  | 33  | High-quality | 100 |
| Sample_T6A_k141_131858 | 456279 | 345 | 1  | 262 | High-quality | 100 |
| Sample_T6B_k141_24490  | 282218 | 217 | 3  | 149 | High-quality | 100 |
| Sample_T6B_k141_187919 | 80336  | 91  | 25 | 10  | High-quality | 100 |
| Sample_T6B_k141_127866 | 397828 | 333 | 1  | 198 | High-quality | 100 |
| Sample_T6C_k141_224146 | 162277 | 137 | 1  | 94  | High-quality | 100 |
| Sample_T7A_k141_69836  | 303449 | 258 | 1  | 181 | High-quality | 100 |
| Sample_T7A_k141_116373 | 72749  | 87  | 17 | 8   | High-quality | 100 |
| Sample_T7A_k141_26373  | 692608 | 607 | 3  | 489 | High-quality | 100 |
| Sample_T7A_k141_141690 | 323919 | 269 | 1  | 202 | High-quality | 100 |
| Sample_T7A_k141_33838  | 272397 | 265 | 3  | 131 | High-quality | 100 |
| Sample_T7A_k141_38683  | 130406 | 109 | 1  | 72  | High-quality | 100 |
| Sample_T7A_k141_154900 | 38705  | 31  | 1  | 4   | Complete     | 100 |
| Sample_T7A_k141_40065  | 225445 | 248 | 3  | 126 | High-quality | 100 |
| Sample_T7B_k141_76897  | 631945 | 519 | 2  | 360 | High-quality | 100 |
| Sample_T7C_k141_155544 | 157642 | 138 | 2  | 82  | High-quality | 100 |
| Sample_T8A_k141_104811 | 42854  | 39  | 2  | 4   | High-quality | 100 |
| Sample_T8A_k141_63251  | 33887  | 42  | 4  | 8   | High-quality | 100 |

|                                    |        |     |    |     |              |     |
|------------------------------------|--------|-----|----|-----|--------------|-----|
| Sample_T8A_k141_65961              | 34811  | 20  | 1  | 9   | High-quality | 100 |
| Sample_T8A_k141_41463              | 162594 | 148 | 2  | 84  | High-quality | 100 |
| Sample_T8A_k141_19567              | 42624  | 38  | 1  | 21  | High-quality | 100 |
| Sample_T8A_k141_102859             | 462866 | 432 | 1  | 331 | High-quality | 100 |
| Sample_T8A_k141_50886              | 50232  | 34  | 0  | 23  | High-quality | 100 |
| Sample_T8B_k141_171140             | 228345 | 208 | 1  | 169 | High-quality | 100 |
| Sample_T8B_k141_226962             | 391194 | 358 | 1  | 276 | High-quality | 100 |
| Sample_T8B_k141_34368              | 81409  | 69  | 1  | 45  | High-quality | 100 |
| Sample_T8B_k141_122070             | 46910  | 57  | 1  | 17  | High-quality | 100 |
| Sample_T8C_k141_157493             | 148026 | 134 | 2  | 85  | High-quality | 100 |
| Sample_T8C_k141_91163              | 201722 | 143 | 1  | 102 | High-quality | 100 |
| Sample_T8C_k141_137660             | 70786  | 72  | 1  | 33  | High-quality | 100 |
| Sample_T8C_k141_15608              | 193561 | 197 | 1  | 117 | High-quality | 100 |
| Sample_C10A_k141_179928            | 105515 | 130 | 8  | 2   | Complete     | 100 |
| Sample_C10A_k141_342425            | 46023  | 76  | 45 | 0   | Complete     | 100 |
| Sample_C10A_k141_177158            | 74529  | 103 | 20 | 7   | High-quality | 100 |
| Sample_C10A_k141_18034             | 11072  | 11  | 3  | 0   | High-quality | 100 |
| Sample_C10A_k141_208919            | 182940 | 215 | 22 | 8   | Complete     | 100 |
| Sample_C10A_k141_318893            | 39078  | 62  | 16 | 1   | Complete     | 100 |
| Sample_C10A_k141_105950_fragment_1 | 49214  | 67  | 19 | 7   | High-quality | 100 |
| Sample_C10A_k141_227889            | 6477   | 9   | 3  | 0   | High-quality | 100 |
| Sample_C10A_k141_261965            | 83107  | 102 | 35 | 0   | High-quality | 100 |
| Sample_C10A_k141_84788             | 55546  | 69  | 24 | 5   | High-quality | 100 |
| Sample_C10A_k141_11358             | 42024  | 45  | 12 | 0   | Complete     | 100 |
| Sample_C10A_k141_94481_fragment_1  | 49004  | 59  | 3  | 3   | High-quality | 100 |
| Sample_C10A_k141_155992_fragment_2 | 57371  | 57  | 21 | 3   | High-quality | 100 |
| Sample_C10A_k141_332781_fragment_1 | 89273  | 89  | 27 | 11  | High-quality | 100 |
| Sample_C10A_k141_121260_fragment_6 | 36584  | 62  | 19 | 5   | High-quality | 100 |
| Sample_C10A_k141_202327            | 40076  | 54  | 7  | 1   | High-quality | 100 |
| Sample_C10A_k141_205041_fragment_1 | 57203  | 91  | 22 | 3   | High-quality | 100 |
| Sample_C10A_k141_176489_fragment_2 | 69084  | 76  | 25 | 10  | Complete     | 100 |
| Sample_C10A_k141_315916_fragment_2 | 6804   | 8   | 1  | 0   | High-quality | 100 |
| Sample_C10A_k141_24305             | 34618  | 60  | 15 | 0   | Complete     | 100 |
| Sample_C10A_k141_275743_fragment_1 | 80647  | 103 | 41 | 3   | High-quality | 100 |
| Sample_C10A_k141_342412            | 29587  | 47  | 11 | 1   | Complete     | 100 |
| Sample_C10B_k141_169764            | 78278  | 123 | 16 | 1   | Complete     | 100 |
| Sample_C10B_k141_105462_fragment_2 | 57980  | 100 | 20 | 1   | High-quality | 100 |
| Sample_C10B_k141_140612            | 66691  | 105 | 21 | 3   | High-quality | 100 |
| Sample_C10B_k141_13371_fragment_1  | 42750  | 67  | 25 | 2   | High-quality | 100 |

|                                    |        |     |    |    |              |     |
|------------------------------------|--------|-----|----|----|--------------|-----|
| Sample_C10B_k141_35347             | 74803  | 127 | 17 | 3  | Complete     | 100 |
| Sample_C10B_k141_141957_fragment_1 | 69149  | 108 | 32 | 7  | High-quality | 100 |
| Sample_C10B_k141_149061_fragment_2 | 38008  | 60  | 19 | 0  | High-quality | 100 |
| Sample_C10B_k141_43765_fragment_2  | 48120  | 63  | 17 | 2  | High-quality | 100 |
| Sample_C10C_k141_155910            | 38533  | 58  | 25 | 3  | Complete     | 100 |
| Sample_C10C_k141_93734             | 64135  | 93  | 21 | 3  | High-quality | 100 |
| Sample_C10C_k141_161317_fragment_1 | 70020  | 98  | 34 | 5  | High-quality | 100 |
| Sample_C10C_k141_145299_fragment_4 | 64338  | 71  | 24 | 4  | High-quality | 100 |
| Sample_C10C_k141_147492            | 5122   | 7   | 1  | 1  | High-quality | 100 |
| Sample_C10C_k141_6215_fragment_1   | 10412  | 11  | 1  | 0  | High-quality | 100 |
| Sample_C10C_k141_214497_fragment_1 | 41902  | 49  | 5  | 3  | High-quality | 100 |
| Sample_C10C_k141_230021            | 38933  | 55  | 20 | 1  | Complete     | 100 |
| Sample_C10C_k141_193041            | 55078  | 86  | 22 | 1  | High-quality | 100 |
| Sample_C11A_k141_187220            | 197925 | 234 | 44 | 9  | Complete     | 100 |
| Sample_C11A_k141_44238_fragment_1  | 36344  | 45  | 5  | 4  | High-quality | 100 |
| Sample_C11A_k141_14876_fragment_2  | 96154  | 136 | 20 | 10 | Complete     | 100 |
| Sample_C11A_k141_24590             | 49907  | 72  | 17 | 0  | Complete     | 100 |
| Sample_C11A_k141_122841_fragment_1 | 44509  | 66  | 21 | 1  | High-quality | 100 |
| Sample_C11A_k141_187219            | 93141  | 95  | 10 | 0  | Complete     | 100 |
| Sample_C11A_k141_112355            | 43828  | 65  | 18 | 3  | High-quality | 100 |
| Sample_C11A_k141_187226            | 185605 | 230 | 31 | 4  | Complete     | 100 |
| Sample_C11B_k141_249306            | 45759  | 57  | 40 | 0  | Complete     | 100 |
| Sample_C11B_k141_249302            | 39839  | 46  | 44 | 0  | Complete     | 100 |
| Sample_C11B_k141_89013_fragment_1  | 32943  | 39  | 29 | 0  | High-quality | 100 |
| Sample_C11B_k141_210614            | 45779  | 69  | 42 | 2  | High-quality | 100 |
| Sample_C11B_k141_77470             | 16069  | 24  | 8  | 0  | Complete     | 100 |
| Sample_C11B_k141_6650_fragment_1   | 51036  | 68  | 22 | 4  | High-quality | 100 |
| Sample_C11B_k141_156496            | 62941  | 84  | 20 | 5  | High-quality | 100 |
| Sample_C11B_k141_226505_fragment_1 | 85461  | 108 | 23 | 1  | High-quality | 100 |
| Sample_C11C_k141_112644_fragment_2 | 53353  | 68  | 19 | 7  | Complete     | 100 |
| Sample_C11C_k141_150983_fragment_2 | 65451  | 105 | 36 | 1  | High-quality | 100 |
| Sample_C11C_k141_22325_fragment_1  | 47073  | 54  | 3  | 5  | High-quality | 100 |
| Sample_C11C_k141_187515            | 44816  | 78  | 50 | 0  | Complete     | 100 |
| Sample_C11C_k141_46924_fragment_1  | 40781  | 63  | 21 | 1  | High-quality | 100 |
| Sample_C11C_k141_150287            | 45760  | 74  | 21 | 0  | Complete     | 100 |
| Sample_C11C_k141_30923             | 61806  | 98  | 33 | 0  | High-quality | 100 |
| Sample_C11C_k141_430               | 64636  | 108 | 30 | 1  | High-quality | 100 |
| Sample_C11C_k141_187506            | 43872  | 51  | 23 | 0  | Complete     | 100 |
| Sample_C11C_k141_187521            | 6417   | 7   | 4  | 0  | Complete     | 100 |

|                                    |        |     |    |    |              |     |
|------------------------------------|--------|-----|----|----|--------------|-----|
| Sample_C12A_k141_214076            | 59934  | 81  | 14 | 0  | Complete     | 100 |
| Sample_C12A_k141_35056             | 40907  | 63  | 19 | 5  | Complete     | 100 |
| Sample_C12A_k141_107526            | 41223  | 66  | 21 | 0  | High-quality | 100 |
| Sample_C12A_k141_112072            | 43733  | 55  | 20 | 1  | Complete     | 100 |
| Sample_C12A_k141_52170_fragment_2  | 84600  | 142 | 16 | 5  | High-quality | 100 |
| Sample_C12A_k141_214067            | 100355 | 95  | 16 | 1  | Complete     | 100 |
| Sample_C12B_k141_81560_fragment_1  | 39425  | 66  | 22 | 1  | High-quality | 100 |
| Sample_C12B_k141_202229            | 7278   | 10  | 3  | 0  | Complete     | 100 |
| Sample_C12B_k141_71926_fragment_1  | 42944  | 69  | 21 | 2  | High-quality | 100 |
| Sample_C12B_k141_71950             | 42946  | 55  | 25 | 1  | High-quality | 100 |
| Sample_C12B_k141_76190_fragment_1  | 11364  | 17  | 0  | 2  | High-quality | 100 |
| Sample_C12B_k141_202242            | 39463  | 68  | 18 | 0  | Complete     | 100 |
| Sample_C12C_k141_7702_fragment_4   | 44749  | 57  | 20 | 5  | Complete     | 100 |
| Sample_C12C_k141_225171            | 58267  | 91  | 21 | 1  | High-quality | 100 |
| Sample_C12C_k141_108798            | 41426  | 52  | 12 | 3  | High-quality | 100 |
| Sample_C12C_k141_216980_fragment_1 | 42330  | 48  | 23 | 5  | Complete     | 100 |
| Sample_C12C_k141_51799             | 102024 | 170 | 16 | 2  | Complete     | 100 |
| Sample_C12C_k141_3082              | 39746  | 76  | 17 | 0  | Complete     | 100 |
| Sample_C12C_k141_28687             | 35946  | 57  | 12 | 0  | Complete     | 100 |
| Sample_C12C_k141_76158             | 32030  | 48  | 19 | 1  | Complete     | 100 |
| Sample_C12C_k141_147995            | 129596 | 162 | 39 | 4  | Complete     | 100 |
| Sample_C12C_k141_240828            | 6133   | 9   | 4  | 0  | Complete     | 100 |
| Sample_C12C_k141_65053             | 96292  | 136 | 35 | 4  | High-quality | 100 |
| Sample_C12C_k141_240834            | 41726  | 69  | 17 | 1  | Complete     | 100 |
| Sample_C13A_k141_95297_fragment_2  | 41372  | 59  | 12 | 2  | High-quality | 100 |
| Sample_C13A_k141_120301            | 109866 | 140 | 24 | 6  | Complete     | 100 |
| Sample_C13A_k141_120298            | 42677  | 58  | 15 | 1  | Complete     | 100 |
| Sample_C13A_k141_97578             | 34612  | 61  | 16 | 1  | Complete     | 100 |
| Sample_C13A_k141_66497             | 12124  | 13  | 1  | 1  | High-quality | 100 |
| Sample_C13A_k141_66772_fragment_1  | 102130 | 129 | 36 | 10 | High-quality | 100 |
| Sample_C13A_k141_25906_fragment_1  | 42701  | 54  | 17 | 4  | High-quality | 100 |
| Sample_C13A_k141_49554_fragment_3  | 54867  | 73  | 18 | 7  | Complete     | 100 |
| Sample_C13A_k141_49554_fragment_4  | 48153  | 50  | 4  | 4  | High-quality | 100 |
| Sample_C13B_k141_80093_fragment_1  | 59577  | 74  | 15 | 13 | Complete     | 100 |
| Sample_C13B_k141_119965            | 24145  | 32  | 3  | 1  | Complete     | 100 |
| Sample_C13B_k141_103599            | 34230  | 58  | 17 | 0  | Complete     | 100 |
| Sample_C13B_k141_119964            | 159204 | 254 | 37 | 4  | Complete     | 100 |
| Sample_C13B_k141_68602_fragment_1  | 64561  | 87  | 13 | 8  | Complete     | 100 |
| Sample_C13B_k141_119983            | 6137   | 9   | 3  | 0  | Complete     | 100 |

|                                    |        |     |    |    |              |     |
|------------------------------------|--------|-----|----|----|--------------|-----|
| Sample_C13B_k141_7191              | 56424  | 86  | 26 | 1  | Complete     | 100 |
| Sample_C13C_k141_89411_fragment_1  | 41397  | 46  | 5  | 0  | High-quality | 100 |
| Sample_C13C_k141_304_fragment_1    | 43114  | 73  | 15 | 1  | High-quality | 100 |
| Sample_C13C_k141_111388            | 38589  | 56  | 22 | 0  | Complete     | 100 |
| Sample_C13C_k141_34796             | 39612  | 59  | 20 | 2  | High-quality | 100 |
| Sample_C13C_k141_33538             | 54703  | 59  | 22 | 7  | High-quality | 100 |
| Sample_C13C_k141_11694             | 16581  | 21  | 7  | 0  | Complete     | 100 |
| Sample_C13C_k141_111407            | 5204   | 8   | 7  | 0  | Complete     | 100 |
| Sample_C13C_k141_91394_fragment_1  | 72142  | 104 | 32 | 8  | Complete     | 100 |
| Sample_C13C_k141_70683_fragment_2  | 19465  | 29  | 2  | 0  | High-quality | 100 |
| Sample_C13C_k141_91543             | 36652  | 61  | 21 | 0  | Complete     | 100 |
| Sample_C14A_k141_22873_fragment_1  | 39508  | 51  | 16 | 2  | High-quality | 100 |
| Sample_C14A_k141_231873            | 6160   | 6   | 3  | 0  | High-quality | 100 |
| Sample_C14A_k141_238943            | 43473  | 74  | 15 | 1  | Complete     | 100 |
| Sample_C14A_k141_238938            | 83441  | 113 | 15 | 2  | Complete     | 100 |
| Sample_C14A_k141_238936            | 78012  | 105 | 10 | 1  | Complete     | 100 |
| Sample_C14A_k141_32371_fragment_1  | 60806  | 83  | 23 | 6  | High-quality | 100 |
| Sample_C14A_k141_13565             | 41967  | 73  | 19 | 0  | Complete     | 100 |
| Sample_C14A_k141_192469_fragment_3 | 47070  | 47  | 9  | 4  | High-quality | 100 |
| Sample_C14A_k141_238946            | 95900  | 97  | 10 | 6  | Complete     | 100 |
| Sample_C14B_k141_69085_fragment_1  | 42635  | 56  | 17 | 6  | High-quality | 100 |
| Sample_C14B_k141_79278_fragment_3  | 68896  | 100 | 30 | 6  | Complete     | 100 |
| Sample_C14B_k141_35432_fragment_2  | 41781  | 59  | 23 | 1  | High-quality | 100 |
| Sample_C14B_k141_107258_fragment_1 | 39643  | 63  | 18 | 3  | High-quality | 100 |
| Sample_C14B_k141_94559_fragment_2  | 36288  | 55  | 19 | 1  | High-quality | 100 |
| Sample_C14B_k141_13475_fragment_1  | 59382  | 89  | 21 | 6  | High-quality | 100 |
| Sample_C14C_k141_155654            | 43803  | 51  | 8  | 1  | Complete     | 100 |
| Sample_C14C_k141_154923_fragment_1 | 38363  | 51  | 24 | 3  | High-quality | 100 |
| Sample_C14C_k141_141926            | 133546 | 249 | 19 | 13 | High-quality | 100 |
| Sample_C14C_k141_40329             | 45814  | 70  | 18 | 7  | High-quality | 100 |
| Sample_C14C_k141_189198            | 51945  | 76  | 21 | 1  | Complete     | 100 |
| Sample_C14C_k141_18812             | 44329  | 76  | 24 | 0  | Complete     | 100 |
| Sample_C14C_k141_136341            | 85763  | 145 | 17 | 1  | Complete     | 100 |
| Sample_C1A_k141_263133             | 181852 | 308 | 26 | 3  | Complete     | 100 |
| Sample_C1B_k141_124140             | 42132  | 69  | 17 | 0  | Complete     | 100 |
| Sample_C1B_k141_219692             | 76982  | 125 | 20 | 3  | Complete     | 100 |
| Sample_C1B_k141_2037               | 38479  | 55  | 13 | 1  | High-quality | 100 |
| Sample_C1B_k141_144290             | 378307 | 552 | 49 | 20 | Complete     | 100 |
| Sample_C1B_k141_35778              | 80747  | 130 | 20 | 2  | Complete     | 100 |

|                                   |        |     |    |   |              |     |
|-----------------------------------|--------|-----|----|---|--------------|-----|
| Sample_C1B_k141_204372            | 124793 | 152 | 32 | 8 | Complete     | 100 |
| Sample_C1B_k141_280959            | 100901 | 172 | 19 | 2 | Complete     | 100 |
| Sample_C1B_k141_280967            | 49864  | 78  | 24 | 1 | Complete     | 100 |
| Sample_C1C_k141_102302            | 51597  | 56  | 12 | 6 | High-quality | 100 |
| Sample_C1C_k141_137851_fragment_1 | 39197  | 51  | 20 | 0 | High-quality | 100 |
| Sample_C1C_k141_69794_fragment_1  | 53181  | 84  | 19 | 1 | High-quality | 100 |
| Sample_C1C_k141_19685             | 38911  | 55  | 18 | 3 | High-quality | 100 |
| Sample_C1C_k141_117218            | 73613  | 101 | 27 | 2 | Complete     | 100 |
| Sample_C1C_k141_131190_fragment_1 | 34707  | 59  | 14 | 0 | High-quality | 100 |
| Sample_C2A_k141_22896_fragment_4  | 53055  | 58  | 25 | 3 | High-quality | 100 |
| Sample_C2A_k141_212200            | 44752  | 47  | 15 | 5 | High-quality | 100 |
| Sample_C2A_k141_330287            | 42662  | 63  | 15 | 1 | Complete     | 100 |
| Sample_C2A_k141_282625            | 46157  | 76  | 19 | 0 | Complete     | 100 |
| Sample_C2A_k141_41629_fragment_2  | 110362 | 175 | 27 | 1 | High-quality | 100 |
| Sample_C2A_k141_199800_fragment_3 | 56200  | 82  | 22 | 5 | Complete     | 100 |
| Sample_C2A_k141_168470            | 45886  | 80  | 22 | 3 | High-quality | 100 |
| Sample_C2A_k141_103709            | 41090  | 56  | 6  | 0 | Complete     | 100 |
| Sample_C2A_k141_105047            | 41880  | 60  | 16 | 6 | Complete     | 100 |
| Sample_C2A_k141_26924             | 5558   | 9   | 6  | 0 | High-quality | 100 |
| Sample_C2A_k141_201647            | 54482  | 78  | 33 | 3 | High-quality | 100 |
| Sample_C2A_k141_32930             | 42445  | 82  | 15 | 1 | Complete     | 100 |
| Sample_C2A_k141_236347            | 39712  | 63  | 12 | 2 | Complete     | 100 |
| Sample_C2A_k141_330290            | 61658  | 100 | 20 | 0 | Complete     | 100 |
| Sample_C2A_k141_268493_fragment_1 | 74029  | 103 | 22 | 2 | High-quality | 100 |
| Sample_C2B_k141_346641            | 41369  | 47  | 9  | 0 | Complete     | 100 |
| Sample_C2B_k141_213011            | 75580  | 122 | 19 | 5 | Complete     | 100 |
| Sample_C2B_k141_52461             | 44639  | 72  | 16 | 1 | Complete     | 100 |
| Sample_C2B_k141_161172            | 14335  | 20  | 4  | 0 | High-quality | 100 |
| Sample_C2B_k141_184423_fragment_1 | 57841  | 85  | 17 | 6 | High-quality | 100 |
| Sample_C2B_k141_108374            | 39613  | 67  | 13 | 0 | High-quality | 100 |
| Sample_C2B_k141_346631            | 55326  | 68  | 9  | 1 | Complete     | 100 |
| Sample_C2B_k141_346642            | 38155  | 65  | 19 | 0 | Complete     | 100 |
| Sample_C2B_k141_346647            | 29904  | 45  | 11 | 1 | Complete     | 100 |
| Sample_C2B_k141_70119             | 42626  | 77  | 17 | 0 | Complete     | 100 |
| Sample_C2B_k141_346650            | 46558  | 79  | 19 | 2 | Complete     | 100 |
| Sample_C2B_k141_102462            | 46356  | 72  | 12 | 1 | High-quality | 100 |
| Sample_C2B_k141_279991_fragment_1 | 40601  | 58  | 16 | 2 | High-quality | 100 |
| Sample_C2B_k141_107592            | 35992  | 52  | 12 | 3 | High-quality | 100 |
| Sample_C2B_k141_183031            | 79559  | 127 | 45 | 0 | High-quality | 100 |

|                                   |        |     |    |   |              |     |
|-----------------------------------|--------|-----|----|---|--------------|-----|
| Sample_C2B_k141_216423            | 11008  | 18  | 1  | 1 | High-quality | 100 |
| Sample_C2B_k141_82474             | 40416  | 52  | 9  | 0 | Complete     | 100 |
| Sample_C2B_k141_346630            | 136105 | 171 | 29 | 3 | Complete     | 100 |
| Sample_C2B_k141_346632            | 34851  | 61  | 19 | 0 | Complete     | 100 |
| Sample_C2B_k141_346639            | 59912  | 91  | 15 | 0 | Complete     | 100 |
| Sample_C2C_k141_233477            | 148264 | 189 | 25 | 4 | Complete     | 100 |
| Sample_C2C_k141_221907            | 46956  | 66  | 21 | 2 | High-quality | 100 |
| Sample_C2C_k141_186502            | 57210  | 101 | 22 | 1 | Complete     | 100 |
| Sample_C2C_k141_276456            | 76601  | 94  | 19 | 0 | High-quality | 100 |
| Sample_C2C_k141_222147_fragment_2 | 56268  | 65  | 24 | 1 | High-quality | 100 |
| Sample_C2C_k141_281589            | 90618  | 108 | 9  | 8 | Complete     | 100 |
| Sample_C2C_k141_37389             | 81732  | 121 | 28 | 4 | High-quality | 100 |
| Sample_C2C_k141_254616            | 38239  | 63  | 12 | 1 | High-quality | 100 |
| Sample_C3A_k141_77400             | 47790  | 65  | 27 | 1 | High-quality | 100 |
| Sample_C3A_k141_211621_fragment_2 | 14025  | 18  | 1  | 2 | High-quality | 100 |
| Sample_C3A_k141_212548_fragment_1 | 46986  | 65  | 15 | 0 | High-quality | 100 |
| Sample_C3A_k141_259454            | 87878  | 114 | 14 | 2 | Complete     | 100 |
| Sample_C3A_k141_238617            | 134086 | 182 | 33 | 3 | High-quality | 100 |
| Sample_C3A_k141_259460            | 40011  | 47  | 44 | 0 | Complete     | 100 |
| Sample_C3A_k141_239223            | 13719  | 24  | 2  | 0 | High-quality | 100 |
| Sample_C3A_k141_42808             | 10974  | 17  | 1  | 1 | High-quality | 100 |
| Sample_C3A_k141_259461            | 42138  | 54  | 10 | 2 | Complete     | 100 |
| Sample_C3A_k141_221007            | 43734  | 81  | 17 | 1 | High-quality | 100 |
| Sample_C3A_k141_170867_fragment_1 | 42447  | 58  | 38 | 2 | High-quality | 100 |
| Sample_C3B_k141_204396            | 44386  | 56  | 31 | 3 | High-quality | 100 |
| Sample_C3B_k141_60779_fragment_1  | 36429  | 49  | 18 | 0 | High-quality | 100 |
| Sample_C3B_k141_44649_fragment_1  | 37688  | 53  | 32 | 0 | High-quality | 100 |
| Sample_C3B_k141_219195            | 70228  | 117 | 22 | 6 | High-quality | 100 |
| Sample_C3B_k141_92033             | 17164  | 21  | 6  | 0 | Complete     | 100 |
| Sample_C3C_k141_167078            | 43134  | 68  | 6  | 3 | High-quality | 100 |
| Sample_C3C_k141_15477_fragment_1  | 58801  | 85  | 22 | 5 | High-quality | 100 |
| Sample_C3C_k141_191120_fragment_1 | 90364  | 140 | 28 | 8 | High-quality | 100 |
| Sample_C3C_k141_88524_fragment_1  | 133838 | 199 | 25 | 0 | High-quality | 100 |
| Sample_C3C_k141_41389_fragment_1  | 40353  | 56  | 22 | 0 | High-quality | 100 |
| Sample_C3C_k141_253099            | 59463  | 89  | 32 | 1 | Complete     | 100 |
| Sample_C3C_k141_266494_fragment_1 | 47803  | 69  | 15 | 2 | High-quality | 100 |
| Sample_C3C_k141_269821            | 63794  | 67  | 6  | 0 | Complete     | 100 |
| Sample_C3C_k141_268380            | 62333  | 82  | 32 | 1 | Complete     | 100 |
| Sample_C3C_k141_143848            | 104110 | 158 | 28 | 1 | High-quality | 100 |

|                                    |        |     |    |    |              |     |
|------------------------------------|--------|-----|----|----|--------------|-----|
| Sample_C3C_k141_127174_fragment_10 | 42377  | 81  | 21 | 0  | High-quality | 100 |
| Sample_C4A_k141_174053             | 45447  | 60  | 13 | 1  | Complete     | 100 |
| Sample_C4A_k141_54750              | 57067  | 95  | 15 | 2  | Complete     | 100 |
| Sample_C4A_k141_262747             | 5177   | 8   | 5  | 0  | Complete     | 100 |
| Sample_C4A_k141_57994              | 45265  | 71  | 15 | 1  | Complete     | 100 |
| Sample_C4A_k141_76338              | 45255  | 82  | 16 | 0  | High-quality | 100 |
| Sample_C4A_k141_262732             | 40447  | 71  | 15 | 0  | Complete     | 100 |
| Sample_C4A_k141_30076_fragment_1   | 71989  | 87  | 23 | 10 | High-quality | 100 |
| Sample_C4B_k141_230636_fragment_2  | 59487  | 100 | 22 | 2  | High-quality | 100 |
| Sample_C4B_k141_140102_fragment_1  | 48083  | 79  | 19 | 1  | High-quality | 100 |
| Sample_C4B_k141_110919             | 62399  | 68  | 26 | 3  | High-quality | 100 |
| Sample_C4B_k141_8391               | 85842  | 114 | 17 | 2  | Complete     | 100 |
| Sample_C4B_k141_200226             | 61611  | 107 | 23 | 0  | Complete     | 100 |
| Sample_C4B_k141_68027_fragment_1   | 61618  | 84  | 20 | 6  | Complete     | 100 |
| Sample_C4B_k141_68679              | 5225   | 8   | 1  | 0  | High-quality | 100 |
| Sample_C4B_k141_261371_fragment_2  | 49186  | 60  | 3  | 1  | High-quality | 100 |
| Sample_C4B_k141_23345              | 17152  | 27  | 7  | 0  | Complete     | 100 |
| Sample_C4B_k141_167444             | 59719  | 100 | 26 | 1  | High-quality | 100 |
| Sample_C4C_k141_485_fragment_1     | 12973  | 15  | 1  | 6  | High-quality | 100 |
| Sample_C4C_k141_266359             | 44291  | 72  | 17 | 0  | Complete     | 100 |
| Sample_C4C_k141_10535              | 42984  | 65  | 14 | 2  | Complete     | 100 |
| Sample_C4C_k141_57686_fragment_1   | 64428  | 62  | 23 | 8  | Complete     | 100 |
| Sample_C4C_k141_185454             | 153172 | 211 | 37 | 4  | High-quality | 100 |
| Sample_C4C_k141_169692             | 46180  | 76  | 17 | 0  | Complete     | 100 |
| Sample_C4C_k141_266367             | 37940  | 53  | 24 | 0  | Complete     | 100 |
| Sample_C4C_k141_225732             | 79911  | 138 | 18 | 5  | Complete     | 100 |
| Sample_C4C_k141_223197             | 39203  | 60  | 16 | 1  | Complete     | 100 |
| Sample_C4C_k141_266364             | 118006 | 151 | 38 | 3  | Complete     | 100 |
| Sample_C4C_k141_93468_fragment_2   | 71308  | 112 | 23 | 8  | High-quality | 100 |
| Sample_C4C_k141_231036             | 66567  | 89  | 24 | 3  | High-quality | 100 |
| Sample_C4C_k141_66649              | 51193  | 59  | 3  | 6  | Complete     | 100 |
| Sample_C5A_k141_85212              | 44190  | 66  | 19 | 4  | Complete     | 100 |
| Sample_C5A_k141_224321             | 42777  | 67  | 21 | 3  | High-quality | 100 |
| Sample_C5A_k141_239468             | 113654 | 135 | 13 | 4  | High-quality | 100 |
| Sample_C5A_k141_291115             | 6329   | 8   | 2  | 0  | Complete     | 100 |
| Sample_C5A_k141_291098             | 86484  | 116 | 14 | 2  | Complete     | 100 |
| Sample_C5A_k141_291099             | 159981 | 168 | 14 | 4  | Complete     | 100 |
| Sample_C5A_k141_271588             | 20243  | 34  | 4  | 1  | Complete     | 100 |
| Sample_C5A_k141_151990_fragment_1  | 46098  | 51  | 19 | 3  | High-quality | 100 |



|                                   |        |     |    |    |              |     |
|-----------------------------------|--------|-----|----|----|--------------|-----|
| Sample_C5C_k141_109556            | 34866  | 43  | 23 | 0  | High-quality | 100 |
| Sample_C5C_k141_30151_fragment_1  | 14908  | 15  | 5  | 0  | High-quality | 100 |
| Sample_C5C_k141_120119            | 37723  | 57  | 13 | 3  | Complete     | 100 |
| Sample_C5C_k141_52268_fragment_2  | 35369  | 52  | 17 | 1  | High-quality | 100 |
| Sample_C6A_k141_19224             | 6980   | 10  | 3  | 0  | High-quality | 100 |
| Sample_C6A_k141_36275_fragment_2  | 39904  | 59  | 22 | 0  | High-quality | 100 |
| Sample_C6A_k141_77660_fragment_1  | 58477  | 64  | 23 | 5  | High-quality | 100 |
| Sample_C6A_k141_149074            | 85852  | 108 | 20 | 7  | High-quality | 100 |
| Sample_C6A_k141_114932            | 35246  | 65  | 19 | 0  | Complete     | 100 |
| Sample_C6A_k141_212784_fragment_1 | 83771  | 113 | 16 | 8  | High-quality | 100 |
| Sample_C6B_k141_50026_fragment_1  | 37137  | 45  | 16 | 0  | High-quality | 100 |
| Sample_C6B_k141_1610              | 38497  | 48  | 6  | 0  | Complete     | 100 |
| Sample_C6B_k141_60682             | 36195  | 60  | 24 | 0  | High-quality | 100 |
| Sample_C6B_k141_218088            | 29579  | 45  | 15 | 0  | Complete     | 100 |
| Sample_C6B_k141_125048_fragment_1 | 45163  | 60  | 16 | 6  | High-quality | 100 |
| Sample_C6B_k141_146065            | 54425  | 77  | 22 | 10 | Complete     | 100 |
| Sample_C6B_k141_75790_fragment_2  | 42682  | 61  | 16 | 2  | High-quality | 100 |
| Sample_C6B_k141_103062            | 84065  | 136 | 31 | 2  | Complete     | 100 |
| Sample_C6C_k141_95107             | 66176  | 62  | 13 | 10 | High-quality | 100 |
| Sample_C6C_k141_165146_fragment_1 | 89957  | 126 | 29 | 5  | High-quality | 100 |
| Sample_C6C_k141_170257            | 159273 | 210 | 20 | 4  | Complete     | 100 |
| Sample_C6C_k141_122860_fragment_1 | 79129  | 108 | 23 | 5  | Complete     | 100 |
| Sample_C6C_k141_244630            | 33798  | 54  | 16 | 0  | Complete     | 100 |
| Sample_C6C_k141_76681             | 6338   | 5   | 1  | 0  | High-quality | 100 |
| Sample_C6C_k141_166530_fragment_3 | 37889  | 51  | 20 | 1  | High-quality | 100 |
| Sample_C6C_k141_86800_fragment_1  | 38804  | 52  | 24 | 1  | High-quality | 100 |
| Sample_C7A_k141_111088            | 101152 | 176 | 14 | 1  | Complete     | 100 |
| Sample_C7A_k141_61483             | 61518  | 90  | 36 | 1  | High-quality | 100 |
| Sample_C7A_k141_5331_fragment_2   | 56659  | 67  | 21 | 4  | High-quality | 100 |
| Sample_C7A_k141_120863_fragment_1 | 85668  | 116 | 39 | 4  | High-quality | 100 |
| Sample_C7A_k141_1680              | 122169 | 152 | 38 | 3  | High-quality | 100 |
| Sample_C7B_k141_184777            | 41360  | 78  | 18 | 1  | Complete     | 100 |
| Sample_C7B_k141_55721_fragment_4  | 63188  | 107 | 21 | 1  | High-quality | 100 |
| Sample_C7B_k141_106634            | 5904   | 8   | 3  | 0  | Complete     | 100 |
| Sample_C7B_k141_184790            | 6184   | 6   | 4  | 0  | Complete     | 100 |
| Sample_C7C_k141_45241             | 17269  | 22  | 0  | 3  | High-quality | 100 |
| Sample_C8A_k141_182399            | 176691 | 212 | 31 | 4  | Complete     | 100 |
| Sample_C8A_k141_161734            | 78638  | 79  | 30 | 9  | High-quality | 100 |
| Sample_C8A_k141_60392             | 77484  | 122 | 19 | 3  | Complete     | 100 |

|                                   |        |     |    |    |              |     |
|-----------------------------------|--------|-----|----|----|--------------|-----|
| Sample_C8A_k141_161111            | 100060 | 172 | 20 | 1  | High-quality | 100 |
| Sample_C8A_k141_84594             | 18172  | 29  | 7  | 0  | Complete     | 100 |
| Sample_C8B_k141_22061_fragment_1  | 71257  | 96  | 17 | 5  | High-quality | 100 |
| Sample_C8B_k141_104270_fragment_5 | 42842  | 68  | 24 | 2  | High-quality | 100 |
| Sample_C8B_k141_127738            | 10345  | 14  | 1  | 0  | High-quality | 100 |
| Sample_C8B_k141_207777            | 38304  | 51  | 6  | 1  | Complete     | 100 |
| Sample_C8B_k141_207170_fragment_1 | 137031 | 194 | 64 | 8  | Complete     | 100 |
| Sample_C8B_k141_166111            | 20620  | 35  | 3  | 1  | High-quality | 100 |
| Sample_C8B_k141_146461            | 33517  | 48  | 13 | 0  | Complete     | 100 |
| Sample_C8B_k141_187910            | 42675  | 69  | 17 | 0  | Complete     | 100 |
| Sample_C8B_k141_175861            | 59840  | 91  | 22 | 2  | High-quality | 100 |
| Sample_C8B_k141_109776            | 41005  | 46  | 4  | 1  | High-quality | 100 |
| Sample_C8C_k141_119772_fragment_3 | 65507  | 106 | 28 | 0  | High-quality | 100 |
| Sample_C8C_k141_178248            | 6187   | 7   | 4  | 0  | Complete     | 100 |
| Sample_C8C_k141_137029            | 43777  | 68  | 15 | 1  | High-quality | 100 |
| Sample_C8C_k141_178229            | 40181  | 53  | 10 | 0  | Complete     | 100 |
| Sample_C8C_k141_57654_fragment_1  | 51822  | 78  | 18 | 9  | High-quality | 100 |
| Sample_C8C_k141_7093_fragment_2   | 74846  | 111 | 42 | 5  | High-quality | 100 |
| Sample_C8C_k141_54801_fragment_2  | 85197  | 135 | 30 | 6  | High-quality | 100 |
| Sample_C8C_k141_50188             | 177939 | 264 | 26 | 4  | High-quality | 100 |
| Sample_C8C_k141_178231            | 6387   | 6   | 3  | 0  | Complete     | 100 |
| Sample_C8C_k141_45546             | 35716  | 57  | 17 | 0  | Complete     | 100 |
| Sample_C8C_k141_145064            | 44618  | 66  | 19 | 3  | High-quality | 100 |
| Sample_C8C_k141_172345            | 99200  | 116 | 19 | 3  | Complete     | 100 |
| Sample_C8C_k141_76497             | 55840  | 60  | 21 | 1  | High-quality | 100 |
| Sample_C8C_k141_33206_fragment_4  | 58170  | 71  | 23 | 6  | High-quality | 100 |
| Sample_C8C_k141_54847_fragment_1  | 61912  | 87  | 13 | 4  | High-quality | 100 |
| Sample_C8C_k141_21129_fragment_2  | 117228 | 149 | 27 | 13 | High-quality | 100 |
| Sample_C9A_k141_47763_fragment_1  | 45159  | 51  | 24 | 0  | High-quality | 100 |
| Sample_C9A_k141_15424_fragment_1  | 63916  | 97  | 32 | 1  | High-quality | 100 |
| Sample_C9A_k141_117382            | 44787  | 63  | 17 | 4  | High-quality | 100 |
| Sample_C9A_k141_9399              | 41784  | 64  | 24 | 3  | High-quality | 100 |
| Sample_C9A_k141_135364            | 119967 | 166 | 29 | 2  | Complete     | 100 |
| Sample_C9A_k141_128816            | 41058  | 63  | 19 | 2  | Complete     | 100 |
| Sample_C9A_k141_135370            | 5795   | 9   | 5  | 0  | Complete     | 100 |
| Sample_C9A_k141_29425             | 79252  | 127 | 17 | 1  | High-quality | 100 |
| Sample_C9A_k141_135366            | 47336  | 61  | 12 | 0  | Complete     | 100 |
| Sample_C9B_k141_64969             | 46951  | 65  | 27 | 1  | High-quality | 100 |
| Sample_C9B_k141_41435             | 8159   | 12  | 1  | 0  | Complete     | 100 |

|                                    |        |     |    |   |              |     |
|------------------------------------|--------|-----|----|---|--------------|-----|
| Sample_C9B_k141_107988_fragment_1  | 65728  | 88  | 16 | 0 | High-quality | 100 |
| Sample_C9B_k141_55734_fragment_1   | 68371  | 95  | 26 | 2 | High-quality | 100 |
| Sample_C9C_k141_88091              | 38368  | 57  | 17 | 0 | High-quality | 100 |
| Sample_C9C_k141_56643              | 48292  | 61  | 20 | 0 | Complete     | 100 |
| Sample_C9C_k141_103559             | 36543  | 52  | 24 | 0 | Complete     | 100 |
| Sample_C9C_k141_49776              | 48027  | 67  | 30 | 1 | High-quality | 100 |
| Sample_C9C_k141_73648              | 24854  | 31  | 3  | 1 | Complete     | 100 |
| Sample_C9C_k141_65996_fragment_1   | 38235  | 45  | 4  | 2 | High-quality | 100 |
| Sample_C9C_k141_74396_fragment_2   | 56197  | 80  | 21 | 4 | Complete     | 100 |
| Sample_C9C_k141_77261              | 5418   | 10  | 6  | 0 | Complete     | 100 |
| Sample_C9C_k141_72908              | 75127  | 70  | 7  | 5 | High-quality | 100 |
| Sample_T10A_k141_121564_fragment_1 | 53154  | 72  | 24 | 3 | High-quality | 100 |
| Sample_T10A_k141_44794             | 16042  | 20  | 7  | 0 | Complete     | 100 |
| Sample_T10A_k141_184450            | 154143 | 199 | 15 | 4 | Complete     | 100 |
| Sample_T10A_k141_140046            | 111113 | 122 | 40 | 4 | Complete     | 100 |
| Sample_T10A_k141_45245             | 7038   | 12  | 0  | 0 | High-quality | 100 |
| Sample_T10A_k141_19038_fragment_1  | 44832  | 63  | 18 | 0 | High-quality | 100 |
| Sample_T10A_k141_94094             | 32394  | 48  | 17 | 1 | Complete     | 100 |
| Sample_T10A_k141_9994              | 44675  | 59  | 11 | 1 | Complete     | 100 |
| Sample_T10A_k141_41253_fragment_3  | 38728  | 55  | 17 | 1 | High-quality | 100 |
| Sample_T10A_k141_170565            | 102907 | 186 | 33 | 1 | Complete     | 100 |
| Sample_T10A_k141_51046             | 43994  | 66  | 14 | 1 | High-quality | 100 |
| Sample_T10B_k141_186414            | 80141  | 125 | 30 | 3 | Complete     | 100 |
| Sample_T10B_k141_84959             | 7149   | 11  | 1  | 1 | High-quality | 100 |
| Sample_T10B_k141_19562_fragment_2  | 57566  | 84  | 20 | 3 | High-quality | 100 |
| Sample_T10B_k141_21815_fragment_2  | 67703  | 94  | 35 | 4 | High-quality | 100 |
| Sample_T10B_k141_180520            | 43565  | 71  | 21 | 0 | High-quality | 100 |
| Sample_T10B_k141_49255             | 29741  | 39  | 6  | 2 | High-quality | 100 |
| Sample_T10B_k141_183845_fragment_1 | 71051  | 98  | 21 | 3 | High-quality | 100 |
| Sample_T10B_k141_52931             | 74536  | 88  | 5  | 9 | Complete     | 100 |
| Sample_T10B_k141_22023             | 78559  | 118 | 22 | 2 | Complete     | 100 |
| Sample_T10C_k141_89312             | 45680  | 77  | 18 | 0 | Complete     | 100 |
| Sample_T10C_k141_83426             | 96707  | 96  | 9  | 0 | High-quality | 100 |
| Sample_T10C_k141_89310             | 45781  | 74  | 21 | 0 | Complete     | 100 |
| Sample_T11A_k141_40763             | 55643  | 94  | 17 | 1 | Complete     | 100 |
| Sample_T11A_k141_120974_fragment_2 | 42140  | 51  | 28 | 1 | High-quality | 100 |
| Sample_T11A_k141_92220             | 61066  | 97  | 26 | 1 | High-quality | 100 |
| Sample_T11A_k141_82524             | 9771   | 11  | 1  | 0 | High-quality | 100 |
| Sample_T11A_k141_153661            | 42577  | 55  | 10 | 0 | Complete     | 100 |

|                                    |        |     |    |    |              |     |
|------------------------------------|--------|-----|----|----|--------------|-----|
| Sample_T11A_k141_149653_fragment_1 | 54906  | 65  | 13 | 2  | High-quality | 100 |
| Sample_T11A_k141_66298             | 60342  | 102 | 18 | 4  | Complete     | 100 |
| Sample_T11A_k141_31785_fragment_1  | 43807  | 67  | 28 | 1  | High-quality | 100 |
| Sample_T11A_k141_124272            | 66576  | 101 | 35 | 3  | High-quality | 100 |
| Sample_T11A_k141_153664            | 6109   | 10  | 3  | 0  | Complete     | 100 |
| Sample_T11A_k141_1173_fragment_1   | 45698  | 66  | 25 | 3  | High-quality | 100 |
| Sample_T11B_k141_130950_fragment_1 | 68724  | 95  | 29 | 4  | High-quality | 100 |
| Sample_T11B_k141_39705_fragment_1  | 88963  | 152 | 38 | 0  | High-quality | 100 |
| Sample_T11B_k141_8353_fragment_3   | 126544 | 151 | 11 | 18 | High-quality | 100 |
| Sample_T11B_k141_118076_fragment_2 | 63904  | 76  | 7  | 0  | High-quality | 100 |
| Sample_T11C_k141_49996_fragment_1  | 75264  | 124 | 18 | 7  | High-quality | 100 |
| Sample_T11C_k141_95529_fragment_1  | 37747  | 54  | 9  | 0  | High-quality | 100 |
| Sample_T11C_k141_58894             | 35568  | 52  | 15 | 1  | High-quality | 100 |
| Sample_T11C_k141_139428_fragment_1 | 83811  | 126 | 45 | 2  | High-quality | 100 |
| Sample_T11C_k141_10686             | 18548  | 24  | 3  | 1  | High-quality | 100 |
| Sample_T11C_k141_167141            | 99661  | 169 | 13 | 2  | Complete     | 100 |
| Sample_T11C_k141_56104_fragment_2  | 41627  | 60  | 13 | 3  | High-quality | 100 |
| Sample_T11C_k141_11538             | 84382  | 112 | 9  | 3  | High-quality | 100 |
| Sample_T12A_k141_2183              | 53781  | 75  | 18 | 1  | High-quality | 100 |
| Sample_T12A_k141_62034             | 17536  | 21  | 6  | 0  | Complete     | 100 |
| Sample_T12A_k141_344756            | 57816  | 94  | 20 | 0  | Complete     | 100 |
| Sample_T12A_k141_175439            | 42480  | 79  | 14 | 0  | Complete     | 100 |
| Sample_T12A_k141_138919_fragment_1 | 36162  | 49  | 16 | 1  | High-quality | 100 |
| Sample_T12A_k141_188418            | 99752  | 98  | 14 | 1  | Complete     | 100 |
| Sample_T12A_k141_344769            | 55877  | 99  | 14 | 2  | Complete     | 100 |
| Sample_T12A_k141_43435_fragment_1  | 50960  | 57  | 14 | 4  | High-quality | 100 |
| Sample_T12A_k141_329582            | 6626   | 6   | 3  | 0  | High-quality | 100 |
| Sample_T12A_k141_276127            | 46974  | 83  | 27 | 1  | Complete     | 100 |
| Sample_T12A_k141_344761            | 35702  | 65  | 13 | 0  | Complete     | 100 |
| Sample_T12A_k141_183833_fragment_1 | 73577  | 76  | 23 | 11 | High-quality | 100 |
| Sample_T12A_k141_2118_fragment_2   | 54853  | 65  | 23 | 2  | High-quality | 100 |
| Sample_T12A_k141_250292            | 44404  | 61  | 21 | 2  | High-quality | 100 |
| Sample_T12A_k141_79577             | 40888  | 70  | 19 | 2  | Complete     | 100 |
| Sample_T12A_k141_204622            | 71679  | 93  | 25 | 2  | High-quality | 100 |
| Sample_T12A_k141_88914             | 45815  | 61  | 7  | 3  | High-quality | 100 |
| Sample_T12A_k141_207812            | 46109  | 85  | 22 | 0  | Complete     | 100 |
| Sample_T12A_k141_344760            | 42299  | 44  | 9  | 1  | Complete     | 100 |
| Sample_T12A_k141_344772            | 5171   | 9   | 6  | 0  | Complete     | 100 |
| Sample_T12B_k141_174439            | 104554 | 162 | 27 | 1  | Complete     | 100 |

|                                    |        |     |    |    |              |     |
|------------------------------------|--------|-----|----|----|--------------|-----|
| Sample_T12B_k141_134060_fragment_1 | 39624  | 56  | 14 | 2  | High-quality | 100 |
| Sample_T12B_k141_60174             | 41905  | 73  | 17 | 1  | Complete     | 100 |
| Sample_T12B_k141_189374            | 108693 | 132 | 27 | 2  | Complete     | 100 |
| Sample_T12B_k141_189375            | 6392   | 6   | 3  | 0  | Complete     | 100 |
| Sample_T12C_k141_186893            | 7265   | 9   | 3  | 0  | Complete     | 100 |
| Sample_T12C_k141_61294_fragment_1  | 42398  | 62  | 18 | 2  | High-quality | 100 |
| Sample_T12C_k141_27078             | 45435  | 52  | 3  | 2  | High-quality | 100 |
| Sample_T12C_k141_1331              | 57490  | 97  | 24 | 2  | Complete     | 100 |
| Sample_T12C_k141_196407            | 88403  | 147 | 18 | 3  | Complete     | 100 |
| Sample_T12C_k141_196416            | 58890  | 82  | 27 | 1  | Complete     | 100 |
| Sample_T12C_k141_14380_fragment_2  | 40059  | 59  | 18 | 0  | High-quality | 100 |
| Sample_T13A_k141_132877            | 79470  | 115 | 18 | 0  | Complete     | 100 |
| Sample_T13A_k141_124272            | 18527  | 23  | 8  | 0  | High-quality | 100 |
| Sample_T13A_k141_132876            | 43822  | 56  | 49 | 0  | Complete     | 100 |
| Sample_T13A_k141_120565            | 68540  | 94  | 35 | 1  | High-quality | 100 |
| Sample_T13A_k141_132883            | 46335  | 55  | 9  | 0  | Complete     | 100 |
| Sample_T13B_k141_184398            | 45760  | 71  | 11 | 1  | Complete     | 100 |
| Sample_T13B_k141_35777_fragment_1  | 35924  | 53  | 17 | 3  | High-quality | 100 |
| Sample_T13B_k141_72989             | 11152  | 12  | 1  | 1  | High-quality | 100 |
| Sample_T13B_k141_74963_fragment_2  | 149251 | 210 | 29 | 5  | High-quality | 100 |
| Sample_T13B_k141_131879_fragment_2 | 38587  | 53  | 23 | 0  | High-quality | 100 |
| Sample_T13B_k141_130801_fragment_1 | 41562  | 66  | 29 | 0  | High-quality | 100 |
| Sample_T13B_k141_24824             | 17815  | 27  | 8  | 0  | High-quality | 100 |
| Sample_T13B_k141_54216             | 31042  | 48  | 13 | 1  | High-quality | 100 |
| Sample_T13B_k141_46918             | 17449  | 26  | 9  | 0  | Complete     | 100 |
| Sample_T13C_k141_124423_fragment_2 | 55985  | 84  | 29 | 1  | High-quality | 100 |
| Sample_T13C_k141_145369            | 5957   | 9   | 4  | 0  | Complete     | 100 |
| Sample_T13C_k141_23189_fragment_6  | 37801  | 61  | 20 | 0  | High-quality | 100 |
| Sample_T13C_k141_145370            | 40521  | 70  | 21 | 0  | Complete     | 100 |
| Sample_T13C_k141_15970_fragment_3  | 50065  | 58  | 19 | 7  | High-quality | 100 |
| Sample_T13C_k141_123276            | 43036  | 60  | 13 | 1  | High-quality | 100 |
| Sample_T13C_k141_145371            | 43727  | 71  | 18 | 0  | Complete     | 100 |
| Sample_T14A_k141_35971             | 45273  | 70  | 21 | 0  | Complete     | 100 |
| Sample_T14A_k141_242962            | 36007  | 75  | 11 | 1  | Complete     | 100 |
| Sample_T14A_k141_189019_fragment_1 | 49324  | 71  | 14 | 10 | Complete     | 100 |
| Sample_T14A_k141_242969            | 61636  | 113 | 24 | 0  | Complete     | 100 |
| Sample_T14A_k141_160595            | 10745  | 13  | 1  | 0  | High-quality | 100 |
| Sample_T14A_k141_15934_fragment_3  | 58509  | 90  | 19 | 4  | High-quality | 100 |
| Sample_T14A_k141_94084_fragment_6  | 40520  | 60  | 14 | 4  | High-quality | 100 |

|                                    |        |     |    |    |              |     |
|------------------------------------|--------|-----|----|----|--------------|-----|
| Sample_T14B_k141_102073            | 77764  | 98  | 22 | 17 | Complete     | 100 |
| Sample_T14B_k141_177008            | 73333  | 101 | 24 | 5  | High-quality | 100 |
| Sample_T14B_k141_35849_fragment_3  | 46229  | 68  | 19 | 1  | High-quality | 100 |
| Sample_T14B_k141_78918             | 37926  | 57  | 12 | 3  | High-quality | 100 |
| Sample_T14B_k141_169946_fragment_1 | 70750  | 89  | 21 | 19 | Complete     | 100 |
| Sample_T14C_k141_37388             | 19047  | 29  | 8  | 0  | Complete     | 100 |
| Sample_T14C_k141_18709_fragment_1  | 47300  | 63  | 27 | 0  | High-quality | 100 |
| Sample_T14C_k141_24865_fragment_1  | 34547  | 42  | 15 | 0  | High-quality | 100 |
| Sample_T14C_k141_165958            | 38008  | 57  | 13 | 3  | Complete     | 100 |
| Sample_T14C_k141_70264_fragment_1  | 42539  | 45  | 4  | 0  | High-quality | 100 |
| Sample_T14C_k141_95605_fragment_5  | 7883   | 13  | 0  | 0  | High-quality | 100 |
| Sample_T15A_k141_165274            | 38706  | 62  | 16 | 4  | Complete     | 100 |
| Sample_T15A_k141_167021_fragment_1 | 66821  | 94  | 29 | 4  | Complete     | 100 |
| Sample_T15A_k141_99106_fragment_1  | 45408  | 61  | 27 | 3  | High-quality | 100 |
| Sample_T15A_k141_109627            | 242157 | 272 | 2  | 20 | High-quality | 100 |
| Sample_T15A_k141_168442_fragment_3 | 132619 | 179 | 8  | 12 | High-quality | 100 |
| Sample_T15B_k141_121042_fragment_1 | 43589  | 67  | 20 | 2  | High-quality | 100 |
| Sample_T15B_k141_35398_fragment_1  | 45458  | 43  | 7  | 2  | High-quality | 100 |
| Sample_T15B_k141_114413_fragment_1 | 62736  | 98  | 32 | 2  | High-quality | 100 |
| Sample_T15B_k141_151148            | 99163  | 126 | 14 | 0  | Complete     | 100 |
| Sample_T15B_k141_16979             | 104568 | 159 | 30 | 1  | Complete     | 100 |
| Sample_T15C_k141_124202_fragment_2 | 41578  | 57  | 14 | 1  | High-quality | 100 |
| Sample_T15C_k141_71007             | 53245  | 75  | 19 | 1  | High-quality | 100 |
| Sample_T15C_k141_70091             | 75817  | 128 | 19 | 2  | Complete     | 100 |
| Sample_T15C_k141_52346_fragment_1  | 47386  | 86  | 22 | 4  | High-quality | 100 |
| Sample_T15C_k141_49043_fragment_5  | 65265  | 80  | 3  | 7  | High-quality | 100 |
| Sample_T15C_k141_78884_fragment_2  | 57886  | 79  | 18 | 2  | High-quality | 100 |
| Sample_T15C_k141_32637_fragment_1  | 167095 | 213 | 4  | 12 | High-quality | 100 |
| Sample_T15C_k141_150669            | 99639  | 94  | 11 | 0  | Complete     | 100 |
| Sample_T16A_k141_105581            | 13355  | 18  | 4  | 0  | Complete     | 100 |
| Sample_T16A_k141_28010_fragment_2  | 38418  | 43  | 32 | 3  | High-quality | 100 |
| Sample_T16B_k141_6566_fragment_1   | 46553  | 65  | 35 | 1  | High-quality | 100 |
| Sample_T16C_k141_39448_fragment_1  | 89152  | 123 | 22 | 5  | High-quality | 100 |
| Sample_T16C_k141_17052             | 5785   | 8   | 5  | 2  | High-quality | 100 |
| Sample_T16C_k141_54509             | 13940  | 23  | 1  | 0  | High-quality | 100 |
| Sample_T16C_k141_91113             | 12383  | 19  | 0  | 1  | High-quality | 100 |
| Sample_T16C_k141_136011_fragment_2 | 41139  | 64  | 16 | 1  | High-quality | 100 |
| Sample_T16C_k141_46649_fragment_1  | 44672  | 49  | 6  | 2  | High-quality | 100 |
| Sample_T16C_k141_145047            | 36946  | 50  | 23 | 1  | High-quality | 100 |

|                                    |        |     |    |    |              |     |
|------------------------------------|--------|-----|----|----|--------------|-----|
| Sample_T16C_k141_146718            | 188959 | 326 | 26 | 3  | Complete     | 100 |
| Sample_T16C_k141_8526_fragment_1   | 81706  | 102 | 32 | 19 | Complete     | 100 |
| Sample_T16C_k141_110317_fragment_5 | 47992  | 54  | 17 | 6  | High-quality | 100 |
| Sample_T16C_k141_47250_fragment_1  | 43583  | 57  | 14 | 6  | Complete     | 100 |
| Sample_T17A_k141_20666             | 37877  | 56  | 13 | 1  | Complete     | 100 |
| Sample_T17A_k141_28935_fragment_1  | 45746  | 54  | 26 | 3  | High-quality | 100 |
| Sample_T17A_k141_23777_fragment_2  | 49485  | 53  | 4  | 4  | High-quality | 100 |
| Sample_T17B_k141_37912             | 39162  | 51  | 48 | 0  | Complete     | 100 |
| Sample_T17C_k141_23948_fragment_1  | 41286  | 57  | 29 | 0  | High-quality | 100 |
| Sample_T17C_k141_39423             | 45847  | 77  | 20 | 1  | Complete     | 100 |
| Sample_T17C_k141_7401_fragment_1   | 59772  | 83  | 20 | 3  | High-quality | 100 |
| Sample_T17C_k141_39428             | 43693  | 58  | 45 | 0  | Complete     | 100 |
| Sample_T18A_k141_200728_fragment_2 | 49787  | 65  | 18 | 7  | Complete     | 100 |
| Sample_T18A_k141_204594            | 5510   | 10  | 6  | 0  | Complete     | 100 |
| Sample_T18A_k141_143758_fragment_1 | 43750  | 60  | 24 | 1  | High-quality | 100 |
| Sample_T18A_k141_87101             | 77470  | 130 | 15 | 2  | Complete     | 100 |
| Sample_T18B_k141_91132             | 46081  | 67  | 25 | 4  | High-quality | 100 |
| Sample_T18B_k141_63934             | 56562  | 101 | 17 | 2  | Complete     | 100 |
| Sample_T18C_k141_63458             | 43951  | 67  | 16 | 1  | Complete     | 100 |
| Sample_T18C_k141_145428            | 62410  | 94  | 19 | 0  | High-quality | 100 |
| Sample_T18C_k141_70431             | 49831  | 77  | 24 | 0  | Complete     | 100 |
| Sample_T18C_k141_122829            | 40271  | 48  | 6  | 0  | High-quality | 100 |
| Sample_T18C_k141_154253            | 101097 | 154 | 9  | 2  | Complete     | 100 |
| Sample_T18C_k141_101925            | 43234  | 51  | 7  | 0  | High-quality | 100 |
| Sample_T1A_k141_3534_fragment_1    | 42029  | 48  | 30 | 1  | High-quality | 100 |
| Sample_T1A_k141_23452              | 41372  | 66  | 45 | 0  | Complete     | 100 |
| Sample_T1A_k141_25707_fragment_1   | 39409  | 55  | 31 | 1  | High-quality | 100 |
| Sample_T1A_k141_14441              | 99864  | 119 | 21 | 2  | High-quality | 100 |
| Sample_T1B_k141_44053              | 55902  | 100 | 22 | 4  | Complete     | 100 |
| Sample_T1B_k141_44049              | 46662  | 69  | 21 | 1  | Complete     | 100 |
| Sample_T1C_k141_71842              | 7079   | 11  | 1  | 0  | Complete     | 100 |
| Sample_T1C_k141_32501              | 108547 | 134 | 9  | 2  | Complete     | 100 |
| Sample_T1C_k141_34693_fragment_1   | 99906  | 138 | 13 | 8  | Complete     | 100 |
| Sample_T2A_k141_115058             | 42501  | 69  | 19 | 0  | Complete     | 100 |
| Sample_T2A_k141_279074             | 48294  | 83  | 48 | 0  | Complete     | 100 |
| Sample_T2A_k141_226904             | 52642  | 63  | 13 | 2  | High-quality | 100 |
| Sample_T2A_k141_114442_fragment_1  | 167295 | 248 | 31 | 5  | High-quality | 100 |
| Sample_T2B_k141_99948              | 62684  | 84  | 8  | 8  | High-quality | 100 |
| Sample_T2B_k141_177025             | 50595  | 74  | 21 | 3  | High-quality | 100 |

|                                   |        |     |    |    |              |     |
|-----------------------------------|--------|-----|----|----|--------------|-----|
| Sample_T2B_k141_70448             | 13767  | 16  | 4  | 0  | High-quality | 100 |
| Sample_T2B_k141_320851            | 5965   | 6   | 1  | 0  | Complete     | 100 |
| Sample_T2B_k141_71618             | 43302  | 56  | 11 | 1  | Complete     | 100 |
| Sample_T2B_k141_176056            | 39259  | 51  | 14 | 1  | High-quality | 100 |
| Sample_T2B_k141_76478             | 43864  | 69  | 15 | 0  | High-quality | 100 |
| Sample_T2B_k141_320850            | 6394   | 7   | 3  | 0  | Complete     | 100 |
| Sample_T2B_k141_262111            | 146778 | 188 | 6  | 15 | High-quality | 100 |
| Sample_T2B_k141_235571            | 53688  | 85  | 29 | 3  | High-quality | 100 |
| Sample_T2B_k141_320848            | 5667   | 8   | 2  | 0  | Complete     | 100 |
| Sample_T2C_k141_277029            | 6326   | 7   | 3  | 0  | Complete     | 100 |
| Sample_T2C_k141_179798_fragment_1 | 40818  | 64  | 26 | 1  | High-quality | 100 |
| Sample_T2C_k141_172890_fragment_1 | 60596  | 67  | 21 | 13 | Complete     | 100 |
| Sample_T2C_k141_157000            | 42295  | 66  | 24 | 0  | Complete     | 100 |
| Sample_T2C_k141_93097             | 36221  | 60  | 8  | 1  | Complete     | 100 |
| Sample_T2C_k141_9745_fragment_2   | 53336  | 71  | 27 | 4  | Complete     | 100 |
| Sample_T2C_k141_65371             | 152025 | 210 | 30 | 7  | High-quality | 100 |
| Sample_T2C_k141_52521             | 40716  | 63  | 11 | 2  | High-quality | 100 |
| Sample_T2C_k141_80902_fragment_1  | 39208  | 58  | 14 | 0  | High-quality | 100 |
| Sample_T2C_k141_57555             | 14684  | 16  | 0  | 3  | High-quality | 100 |
| Sample_T2C_k141_141009_fragment_2 | 59659  | 70  | 15 | 11 | Complete     | 100 |
| Sample_T2C_k141_196660            | 38321  | 69  | 15 | 1  | Complete     | 100 |
| Sample_T2C_k141_277020            | 41329  | 53  | 6  | 0  | Complete     | 100 |
| Sample_T2C_k141_86598             | 5807   | 8   | 5  | 0  | Complete     | 100 |
| Sample_T2C_k141_277036            | 5174   | 9   | 6  | 0  | Complete     | 100 |
| Sample_T3A_k141_107537            | 38712  | 47  | 6  | 0  | Complete     | 100 |
| Sample_T3A_k141_83896_fragment_1  | 58092  | 68  | 35 | 8  | High-quality | 100 |
| Sample_T3A_k141_113137            | 6202   | 7   | 3  | 0  | Complete     | 100 |
| Sample_T3A_k141_51574_fragment_2  | 75479  | 96  | 12 | 8  | High-quality | 100 |
| Sample_T3A_k141_37854             | 40630  | 58  | 15 | 1  | High-quality | 100 |
| Sample_T3A_k141_84551_fragment_1  | 14356  | 18  | 0  | 1  | High-quality | 100 |
| Sample_T3A_k141_35394             | 34236  | 46  | 12 | 0  | Complete     | 100 |
| Sample_T3A_k141_47264             | 43762  | 56  | 29 | 3  | High-quality | 100 |
| Sample_T3B_k141_102008            | 85012  | 95  | 33 | 4  | High-quality | 100 |
| Sample_T3B_k141_186515            | 38827  | 55  | 16 | 0  | Complete     | 100 |
| Sample_T3B_k141_11572_fragment_1  | 38973  | 59  | 15 | 1  | High-quality | 100 |
| Sample_T3B_k141_42389             | 19277  | 30  | 8  | 0  | Complete     | 100 |
| Sample_T3B_k141_122130            | 41945  | 61  | 10 | 0  | Complete     | 100 |
| Sample_T3B_k141_27568             | 17555  | 24  | 6  | 0  | High-quality | 100 |
| Sample_T3B_k141_3850_fragment_2   | 59140  | 86  | 18 | 6  | High-quality | 100 |



|                                   |        |     |    |   |              |     |
|-----------------------------------|--------|-----|----|---|--------------|-----|
| Sample_T3B_k141_157090_fragment_1 | 51458  | 73  | 19 | 2 | High-quality | 100 |
| Sample_T3C_k141_121932_fragment_2 | 61892  | 70  | 24 | 2 | High-quality | 100 |
| Sample_T3C_k141_43810_fragment_1  | 94606  | 140 | 31 | 5 | High-quality | 100 |
| Sample_T3C_k141_141857            | 5399   | 9   | 5  | 0 | Complete     | 100 |
| Sample_T3C_k141_113662_fragment_2 | 52791  | 73  | 29 | 5 | Complete     | 100 |
| Sample_T3C_k141_102340            | 89753  | 149 | 31 | 0 | High-quality | 100 |
| Sample_T3C_k141_32711             | 6198   | 7   | 4  | 0 | Complete     | 100 |
| Sample_T3C_k141_141861            | 5567   | 8   | 6  | 0 | Complete     | 100 |
| Sample_T3C_k141_90385_fragment_5  | 65885  | 60  | 14 | 4 | High-quality | 100 |
| Sample_T3C_k141_17486             | 60266  | 91  | 29 | 0 | Complete     | 100 |
| Sample_T3C_k141_122631            | 6143   | 9   | 3  | 0 | Complete     | 100 |
| Sample_T4A_k141_76842_fragment_2  | 44097  | 54  | 19 | 6 | Complete     | 100 |
| Sample_T4A_k141_91435_fragment_1  | 42098  | 51  | 6  | 5 | High-quality | 100 |
| Sample_T4A_k141_94762             | 61308  | 69  | 23 | 4 | High-quality | 100 |
| Sample_T4A_k141_99972             | 70156  | 114 | 30 | 6 | High-quality | 100 |
| Sample_T4B_k141_285155            | 100352 | 170 | 17 | 1 | High-quality | 100 |
| Sample_T4B_k141_337711_fragment_1 | 8648   | 14  | 0  | 0 | High-quality | 100 |
| Sample_T4B_k141_373739            | 55360  | 99  | 18 | 0 | Complete     | 100 |
| Sample_T4B_k141_341131            | 30768  | 53  | 16 | 0 | Complete     | 100 |
| Sample_T4B_k141_322050_fragment_1 | 46700  | 75  | 18 | 3 | High-quality | 100 |
| Sample_T4B_k141_56684             | 51288  | 77  | 19 | 4 | High-quality | 100 |
| Sample_T4B_k141_276935_fragment_1 | 59120  | 97  | 21 | 3 | High-quality | 100 |
| Sample_T4B_k141_42743             | 45739  | 69  | 20 | 0 | Complete     | 100 |
| Sample_T4B_k141_261292            | 45871  | 75  | 14 | 0 | High-quality | 100 |
| Sample_T4B_k141_307184            | 107119 | 145 | 34 | 0 | Complete     | 100 |
| Sample_T4B_k141_317222            | 30499  | 55  | 10 | 1 | Complete     | 100 |
| Sample_T4B_k141_373742            | 42034  | 68  | 16 | 0 | Complete     | 100 |
| Sample_T4B_k141_64428             | 76810  | 136 | 15 | 4 | Complete     | 100 |
| Sample_T4B_k141_96162_fragment_1  | 50025  | 86  | 16 | 1 | High-quality | 100 |
| Sample_T4B_k141_282736_fragment_1 | 72673  | 96  | 12 | 8 | Complete     | 100 |
| Sample_T4B_k141_224722_fragment_1 | 41616  | 60  | 11 | 1 | High-quality | 100 |
| Sample_T4B_k141_188638            | 33721  | 56  | 15 | 1 | Complete     | 100 |
| Sample_T4B_k141_166765            | 42266  | 78  | 22 | 1 | High-quality | 100 |
| Sample_T4B_k141_233505_fragment_2 | 39022  | 58  | 12 | 2 | High-quality | 100 |
| Sample_T4C_k141_84305_fragment_3  | 43363  | 74  | 18 | 3 | High-quality | 100 |
| Sample_T4C_k141_125422            | 68537  | 98  | 18 | 2 | Complete     | 100 |
| Sample_T5A_k141_48737             | 6537   | 7   | 4  | 0 | High-quality | 100 |
| Sample_T5A_k141_46617             | 7177   | 8   | 1  | 1 | High-quality | 100 |
| Sample_T5A_k141_17989_fragment_2  | 61410  | 85  | 27 | 7 | High-quality | 100 |

|                                   |        |     |    |   |              |     |
|-----------------------------------|--------|-----|----|---|--------------|-----|
| Sample_T5A_k141_57347_fragment_1  | 55308  | 75  | 30 | 3 | High-quality | 100 |
| Sample_T5A_k141_23816             | 39428  | 52  | 20 | 0 | Complete     | 100 |
| Sample_T5A_k141_44639             | 49715  | 74  | 19 | 2 | High-quality | 100 |
| Sample_T5A_k141_59308             | 36108  | 63  | 25 | 1 | Complete     | 100 |
| Sample_T5A_k141_25053_fragment_1  | 51279  | 66  | 19 | 6 | High-quality | 100 |
| Sample_T5A_k141_9360_fragment_1   | 42092  | 52  | 17 | 1 | High-quality | 100 |
| Sample_T5A_k141_18142_fragment_1  | 45966  | 69  | 30 | 2 | High-quality | 100 |
| Sample_T5A_k141_7018              | 10331  | 13  | 1  | 0 | High-quality | 100 |
| Sample_T5B_k141_59832_fragment_1  | 74603  | 88  | 12 | 8 | High-quality | 100 |
| Sample_T5B_k141_82064             | 98978  | 158 | 17 | 1 | Complete     | 100 |
| Sample_T5B_k141_26295_fragment_1  | 62887  | 90  | 33 | 3 | High-quality | 100 |
| Sample_T5B_k141_76397_fragment_1  | 74258  | 117 | 16 | 1 | High-quality | 100 |
| Sample_T5B_k141_40521             | 39344  | 52  | 20 | 0 | High-quality | 100 |
| Sample_T5B_k141_336               | 58973  | 90  | 19 | 4 | High-quality | 100 |
| Sample_T5B_k141_46929_fragment_2  | 68154  | 65  | 23 | 4 | High-quality | 100 |
| Sample_T5C_k141_198725            | 78730  | 115 | 15 | 0 | Complete     | 100 |
| Sample_T5C_k141_112401            | 43854  | 67  | 15 | 2 | High-quality | 100 |
| Sample_T5C_k141_112999            | 41020  | 71  | 13 | 0 | High-quality | 100 |
| Sample_T5C_k141_141839            | 37748  | 59  | 13 | 0 | High-quality | 100 |
| Sample_T5C_k141_64876_fragment_2  | 65184  | 93  | 19 | 6 | High-quality | 100 |
| Sample_T5C_k141_198735            | 28778  | 49  | 17 | 0 | Complete     | 100 |
| Sample_T5C_k141_198747            | 5027   | 9   | 6  | 0 | Complete     | 100 |
| Sample_T5C_k141_198722            | 44201  | 66  | 32 | 0 | Complete     | 100 |
| Sample_T5C_k141_164630_fragment_1 | 72165  | 96  | 22 | 9 | High-quality | 100 |
| Sample_T5C_k141_198731            | 98537  | 159 | 19 | 1 | Complete     | 100 |
| Sample_T5C_k141_67198             | 42558  | 78  | 19 | 1 | Complete     | 100 |
| Sample_T5C_k141_176003            | 47725  | 75  | 19 | 5 | Complete     | 100 |
| Sample_T5C_k141_61733             | 46459  | 77  | 23 | 2 | High-quality | 100 |
| Sample_T5C_k141_198727            | 35036  | 62  | 9  | 1 | Complete     | 100 |
| Sample_T5C_k141_198721            | 100678 | 102 | 11 | 1 | Complete     | 100 |
| Sample_T6A_k141_194395            | 35018  | 54  | 20 | 4 | High-quality | 100 |
| Sample_T6A_k141_39810             | 67901  | 109 | 20 | 9 | Complete     | 100 |
| Sample_T6A_k141_114453_fragment_2 | 73960  | 70  | 2  | 8 | High-quality | 100 |
| Sample_T6A_k141_56295             | 41559  | 64  | 25 | 0 | High-quality | 100 |
| Sample_T6A_k141_5244              | 49987  | 53  | 22 | 4 | High-quality | 100 |
| Sample_T6A_k141_137200            | 52250  | 70  | 15 | 2 | High-quality | 100 |
| Sample_T6B_k141_202148            | 7622   | 15  | 1  | 0 | Complete     | 100 |
| Sample_T6B_k141_46601_fragment_1  | 37815  | 63  | 15 | 0 | High-quality | 100 |
| Sample_T6B_k141_202142            | 210300 | 323 | 50 | 9 | Complete     | 100 |

|                                   |        |     |    |    |              |     |
|-----------------------------------|--------|-----|----|----|--------------|-----|
| Sample_T6B_k141_37858_fragment_1  | 83638  | 97  | 11 | 12 | High-quality | 100 |
| Sample_T6B_k141_7831_fragment_1   | 64590  | 78  | 3  | 1  | High-quality | 100 |
| Sample_T6B_k141_144347_fragment_2 | 56479  | 89  | 23 | 0  | High-quality | 100 |
| Sample_T6B_k141_48911_fragment_1  | 47656  | 54  | 25 | 1  | High-quality | 100 |
| Sample_T6B_k141_21972             | 38276  | 64  | 9  | 1  | Complete     | 100 |
| Sample_T6C_k141_118693_fragment_1 | 55267  | 69  | 33 | 8  | High-quality | 100 |
| Sample_T6C_k141_158503            | 46521  | 63  | 32 | 1  | High-quality | 100 |
| Sample_T6C_k141_131908            | 113728 | 151 | 18 | 4  | High-quality | 100 |
| Sample_T6C_k141_154820_fragment_1 | 46922  | 63  | 15 | 1  | High-quality | 100 |
| Sample_T7A_k141_85587             | 58526  | 74  | 5  | 5  | High-quality | 100 |
| Sample_T7A_k141_128969_fragment_2 | 71629  | 112 | 34 | 7  | High-quality | 100 |
| Sample_T7A_k141_29771_fragment_1  | 71744  | 99  | 21 | 4  | High-quality | 100 |
| Sample_T7A_k141_146475            | 38356  | 59  | 21 | 1  | High-quality | 100 |
| Sample_T7A_k141_47247_fragment_1  | 33266  | 43  | 31 | 0  | High-quality | 100 |
| Sample_T7A_k141_229003            | 5720   | 9   | 6  | 0  | Complete     | 100 |
| Sample_T7A_k141_7215_fragment_1   | 47755  | 59  | 38 | 4  | High-quality | 100 |
| Sample_T7A_k141_229002            | 45966  | 79  | 21 | 0  | Complete     | 100 |
| Sample_T7A_k141_229007            | 35914  | 58  | 23 | 1  | Complete     | 100 |
| Sample_T7A_k141_229010            | 46002  | 70  | 16 | 0  | Complete     | 100 |
| Sample_T7A_k141_652               | 55004  | 97  | 47 | 0  | Complete     | 100 |
| Sample_T7A_k141_70750             | 170187 | 170 | 14 | 14 | High-quality | 100 |
| Sample_T7A_k141_137586_fragment_1 | 36372  | 47  | 30 | 1  | High-quality | 100 |
| Sample_T7A_k141_16138             | 7103   | 9   | 1  | 1  | High-quality | 100 |
| Sample_T7A_k141_207986            | 64037  | 93  | 31 | 3  | High-quality | 100 |
| Sample_T7B_k141_111110_fragment_1 | 35658  | 47  | 22 | 1  | High-quality | 100 |
| Sample_T7B_k141_120797            | 53136  | 83  | 23 | 6  | Complete     | 100 |
| Sample_T7B_k141_124389_fragment_1 | 59888  | 101 | 20 | 2  | High-quality | 100 |
| Sample_T7B_k141_45182_fragment_1  | 39920  | 48  | 7  | 0  | High-quality | 100 |
| Sample_T7C_k141_162616            | 6577   | 8   | 3  | 0  | Complete     | 100 |
| Sample_T8A_k141_102946            | 94324  | 93  | 9  | 1  | High-quality | 100 |
| Sample_T8A_k141_140150            | 72032  | 112 | 18 | 1  | High-quality | 100 |
| Sample_T8A_k141_175688            | 44293  | 50  | 10 | 8  | Complete     | 100 |
| Sample_T8A_k141_223472            | 100398 | 165 | 15 | 1  | Complete     | 100 |
| Sample_T8A_k141_20937_fragment_2  | 38509  | 53  | 16 | 1  | High-quality | 100 |
| Sample_T8A_k141_252853            | 71627  | 134 | 4  | 2  | High-quality | 100 |
| Sample_T8A_k141_63499             | 47946  | 60  | 12 | 4  | High-quality | 100 |
| Sample_T8B_k141_125937_fragment_1 | 120544 | 155 | 28 | 13 | High-quality | 100 |
| Sample_T8B_k141_67249_fragment_1  | 84094  | 108 | 33 | 4  | High-quality | 100 |
| Sample_T8B_k141_188950            | 100574 | 168 | 16 | 1  | High-quality | 100 |

|                                    |        |     |    |     |              |       |
|------------------------------------|--------|-----|----|-----|--------------|-------|
| Sample_T8B_k141_97067              | 46465  | 67  | 16 | 4   | High-quality | 100   |
| Sample_T8B_k141_272687             | 162197 | 208 | 40 | 2   | High-quality | 100   |
| Sample_T8B_k141_280025             | 46369  | 55  | 8  | 1   | Complete     | 100   |
| Sample_T8B_k141_69296              | 32525  | 47  | 11 | 0   | Complete     | 100   |
| Sample_T8B_k141_207622_fragment_1  | 51457  | 64  | 23 | 1   | High-quality | 100   |
| Sample_T8B_k141_280022             | 40649  | 75  | 17 | 0   | Complete     | 100   |
| Sample_T8B_k141_280028             | 44032  | 55  | 7  | 1   | Complete     | 100   |
| Sample_T8B_k141_38801              | 36616  | 56  | 23 | 2   | High-quality | 100   |
| Sample_T8C_k141_136265_fragment_1  | 43711  | 50  | 22 | 2   | High-quality | 100   |
| Sample_T8C_k141_70732              | 100760 | 171 | 20 | 2   | Complete     | 100   |
| Sample_T8C_k141_55157              | 46962  | 83  | 19 | 1   | Complete     | 100   |
| Sample_T8C_k141_17544              | 102034 | 108 | 24 | 0   | High-quality | 100   |
| Sample_T8C_k141_220779             | 51043  | 79  | 18 | 1   | Complete     | 100   |
| Sample_T8C_k141_75853_fragment_1   | 37024  | 43  | 1  | 7   | High-quality | 100   |
| Sample_T8C_k141_220773             | 76413  | 90  | 16 | 1   | Complete     | 100   |
| Sample_T8C_k141_220762             | 38342  | 54  | 22 | 1   | Complete     | 100   |
| Sample_T8C_k141_220765             | 101860 | 130 | 21 | 4   | Complete     | 100   |
| Sample_T8C_k141_102001             | 43397  | 71  | 14 | 3   | High-quality | 100   |
| Sample_T8C_k141_158990             | 42569  | 81  | 16 | 0   | Complete     | 100   |
| Sample_T8C_k141_220772             | 5173   | 9   | 5  | 0   | Complete     | 100   |
| Sample_T8C_k141_128938_fragment_2  | 39915  | 45  | 16 | 2   | High-quality | 100   |
| Sample_T8C_k141_52200_fragment_2   | 43274  | 49  | 23 | 0   | High-quality | 100   |
| Sample_T13B_k141_135470_fragment_2 | 55116  | 74  | 12 | 3   | High-quality | 99.99 |
| Sample_T12A_k141_336036            | 46841  | 74  | 27 | 0   | High-quality | 99.98 |
| Sample_T2C_k141_259480             | 37562  | 59  | 26 | 3   | High-quality | 99.98 |
| Sample_T16C_k141_128143            | 46768  | 36  | 0  | 18  | High-quality | 99.96 |
| Sample_T7A_k141_185647_fragment_1  | 166488 | 243 | 27 | 12  | High-quality | 99.96 |
| Sample_T3A_k141_18283              | 43430  | 56  | 29 | 0   | High-quality | 99.94 |
| Sample_T6A_k141_248321             | 35169  | 60  | 10 | 0   | High-quality | 99.94 |
| Sample_T14A_k141_178501_fragment_1 | 33230  | 47  | 13 | 0   | High-quality | 99.91 |
| Sample_T5A_k141_13334              | 590821 | 523 | 6  | 388 | High-quality | 99.9  |
| Sample_T8C_k141_74250_fragment_2   | 33259  | 48  | 8  | 2   | High-quality | 99.88 |
| Sample_C14A_k141_21472             | 57578  | 81  | 30 | 2   | High-quality | 99.79 |
| Sample_C9C_k141_22552_fragment_2   | 39915  | 39  | 5  | 0   | High-quality | 99.79 |
| Sample_C9B_k141_82784_fragment_1   | 39435  | 55  | 38 | 1   | High-quality | 99.78 |
| Sample_C6B_k141_15690_fragment_1   | 61964  | 96  | 33 | 2   | High-quality | 99.76 |
| Sample_T16A_k141_42942_fragment_1  | 48107  | 64  | 19 | 9   | High-quality | 99.75 |
| Sample_C4A_k141_162034             | 38563  | 63  | 19 | 2   | High-quality | 99.72 |
| Sample_T3B_k141_124107             | 41316  | 70  | 15 | 1   | High-quality | 99.71 |

|                                    |        |     |    |    |              |       |
|------------------------------------|--------|-----|----|----|--------------|-------|
| Sample_C12C_k141_90382_fragment_2  | 42336  | 60  | 16 | 4  | High-quality | 99.7  |
| Sample_C7B_k141_121863             | 15212  | 19  | 1  | 0  | High-quality | 99.69 |
| Sample_T10A_k141_118057_fragment_1 | 82076  | 93  | 24 | 0  | High-quality | 99.69 |
| Sample_T14B_k141_43796_fragment_1  | 13155  | 16  | 2  | 0  | High-quality | 99.69 |
| Sample_C4B_k141_132982             | 42126  | 71  | 19 | 0  | High-quality | 99.68 |
| Sample_T4B_k141_20101_fragment_2   | 33914  | 65  | 15 | 1  | High-quality | 99.68 |
| Sample_T17B_k141_25674_fragment_1  | 38018  | 55  | 20 | 1  | High-quality | 99.67 |
| Sample_T3A_k141_90266_fragment_1   | 60912  | 94  | 20 | 2  | High-quality | 99.67 |
| Sample_C3C_k141_37123_fragment_3   | 71289  | 107 | 29 | 5  | High-quality | 99.66 |
| Sample_C6A_k141_87585              | 32902  | 51  | 18 | 0  | High-quality | 99.66 |
| Sample_T6B_k141_81691_fragment_1   | 39358  | 56  | 23 | 2  | High-quality | 99.65 |
| Sample_C3C_k141_102604_fragment_1  | 64828  | 84  | 30 | 12 | High-quality | 99.63 |
| Sample_T8C_k141_194333             | 6478   | 9   | 3  | 0  | High-quality | 99.61 |
| Sample_C8A_k141_116974_fragment_1  | 43383  | 55  | 42 | 2  | High-quality | 99.59 |
| Sample_C12C_k141_148549            | 120744 | 92  | 2  | 57 | High-quality | 99.57 |
| Sample_C8C_k141_98367_fragment_2   | 46792  | 58  | 7  | 7  | High-quality | 99.56 |
| Sample_C5A_k141_229889_fragment_2  | 60972  | 96  | 15 | 5  | High-quality | 99.53 |
| Sample_T17A_k141_28037_fragment_1  | 47928  | 56  | 39 | 5  | High-quality | 99.53 |
| Sample_T5A_k141_17305_fragment_1   | 44673  | 68  | 16 | 3  | High-quality | 99.53 |
| Sample_T4B_k141_272896             | 76288  | 105 | 36 | 12 | High-quality | 99.52 |
| Sample_T6C_k141_10410_fragment_1   | 38855  | 53  | 21 | 0  | High-quality | 99.51 |
| Sample_C3C_k141_211464_fragment_1  | 66513  | 101 | 36 | 3  | High-quality | 99.48 |
| Sample_C1B_k141_45294              | 86197  | 96  | 1  | 48 | High-quality | 99.46 |
| Sample_C10A_k141_43742_fragment_3  | 108578 | 159 | 35 | 0  | High-quality | 99.46 |
| Sample_T7A_k141_152753             | 76626  | 88  | 12 | 12 | High-quality | 99.42 |
| Sample_T12A_k141_341193            | 34630  | 48  | 13 | 1  | High-quality | 99.41 |
| Sample_T5C_k141_144118             | 12990  | 18  | 0  | 0  | High-quality | 99.4  |
| Sample_C9B_k141_62223              | 176469 | 228 | 40 | 14 | High-quality | 99.39 |
| Sample_C7B_k141_53133              | 129884 | 136 | 3  | 70 | High-quality | 99.37 |
| Sample_C5A_k141_266654_fragment_1  | 42164  | 60  | 22 | 2  | High-quality | 99.36 |
| Sample_T17A_k141_5871_fragment_1   | 41986  | 54  | 24 | 1  | High-quality | 99.36 |
| Sample_C11B_k141_82569             | 92540  | 91  | 10 | 0  | High-quality | 99.33 |
| Sample_C11A_k141_175841_fragment_1 | 116993 | 161 | 12 | 7  | High-quality | 99.32 |
| Sample_C3B_k141_39335              | 84260  | 119 | 33 | 15 | High-quality | 99.3  |
| Sample_C14C_k141_65618             | 54809  | 89  | 16 | 0  | High-quality | 99.29 |
| Sample_T11A_k141_29613_fragment_1  | 41523  | 62  | 19 | 0  | High-quality | 99.29 |
| Sample_C6C_k141_15010              | 151188 | 149 | 4  | 29 | High-quality | 99.26 |
| Sample_C9C_k141_65039              | 60714  | 113 | 15 | 0  | High-quality | 99.26 |
| Sample_T16B_k141_18665             | 46259  | 76  | 22 | 2  | High-quality | 99.26 |

|                                    |        |     |    |     |              |       |
|------------------------------------|--------|-----|----|-----|--------------|-------|
| Sample_C13B_k141_60370             | 32737  | 56  | 26 | 0   | High-quality | 99.25 |
| Sample_T11A_k141_131184            | 56639  | 94  | 19 | 2   | High-quality | 99.23 |
| Sample_T1C_k141_27645              | 41074  | 62  | 6  | 0   | High-quality | 99.23 |
| Sample_C11B_k141_203627_fragment_2 | 39479  | 55  | 17 | 2   | High-quality | 99.22 |
| Sample_C4C_k141_69840_fragment_3   | 38751  | 64  | 21 | 2   | High-quality | 99.19 |
| Sample_C8B_k141_50394              | 168304 | 144 | 1  | 73  | High-quality | 99.18 |
| Sample_C3C_k141_91876_fragment_1   | 47493  | 62  | 27 | 2   | High-quality | 99.18 |
| Sample_T11A_k141_55716_fragment_1  | 18897  | 24  | 3  | 1   | High-quality | 99.16 |
| Sample_T16B_k141_123510            | 34626  | 56  | 24 | 1   | High-quality | 99.15 |
| Sample_C14C_k141_66746_fragment_1  | 37813  | 56  | 10 | 1   | High-quality | 99.12 |
| Sample_C3A_k141_135664             | 5039   | 8   | 6  | 0   | High-quality | 99.11 |
| Sample_T10A_k141_166304_fragment_1 | 65760  | 84  | 24 | 8   | High-quality | 99.11 |
| Sample_T6A_k141_270385_fragment_1  | 38313  | 60  | 18 | 0   | High-quality | 99.11 |
| Sample_C5B_k141_30497              | 48013  | 65  | 32 | 2   | High-quality | 99.09 |
| Sample_T7C_k141_109488             | 31974  | 48  | 18 | 1   | High-quality | 99.06 |
| Sample_T17A_k141_6811_fragment_1   | 40800  | 59  | 36 | 2   | High-quality | 99.05 |
| Sample_T4C_k141_115428             | 172672 | 172 | 2  | 140 | High-quality | 99.04 |
| Sample_T10B_k141_126040            | 11654  | 14  | 5  | 0   | High-quality | 99.02 |
| Sample_C8C_k141_70284_fragment_1   | 38659  | 52  | 25 | 2   | High-quality | 99.01 |
| Sample_T10B_k141_77567             | 87532  | 143 | 30 | 4   | High-quality | 99.01 |
| Sample_C5B_k141_47177_fragment_1   | 46378  | 71  | 53 | 0   | High-quality | 98.99 |
| Sample_T10A_k141_51721_fragment_2  | 55459  | 86  | 15 | 3   | High-quality | 98.99 |
| Sample_C13C_k141_7882_fragment_1   | 165952 | 258 | 43 | 5   | High-quality | 98.93 |
| Sample_C3A_k141_98778              | 149248 | 144 | 3  | 86  | High-quality | 98.91 |
| Sample_T16B_k141_145085_fragment_1 | 41679  | 73  | 17 | 0   | High-quality | 98.91 |
| Sample_C1C_k141_82352              | 61622  | 79  | 32 | 1   | High-quality | 98.85 |
| Sample_C3B_k141_34919              | 41703  | 48  | 3  | 2   | High-quality | 98.85 |
| Sample_T18C_k141_105796_fragment_2 | 40935  | 62  | 6  | 2   | High-quality | 98.83 |
| Sample_T7B_k141_32364_fragment_1   | 38557  | 52  | 15 | 4   | High-quality | 98.83 |
| Sample_T4B_k141_152293_fragment_1  | 37627  | 50  | 18 | 0   | High-quality | 98.82 |
| Sample_C5B_k141_53606_fragment_2   | 49714  | 69  | 26 | 7   | High-quality | 98.81 |
| Sample_C2B_k141_7383               | 79985  | 94  | 2  | 44  | High-quality | 98.79 |
| Sample_C4C_k141_60890              | 41310  | 76  | 19 | 0   | High-quality | 98.79 |
| Sample_C11B_k141_76327_fragment_2  | 55030  | 71  | 33 | 3   | High-quality | 98.74 |
| Sample_C7B_k141_60805_fragment_3   | 62091  | 92  | 31 | 0   | High-quality | 98.73 |
| Sample_T15C_k141_98279_fragment_1  | 39225  | 57  | 13 | 0   | High-quality | 98.71 |
| Sample_C12C_k141_204221            | 486054 | 509 | 4  | 300 | High-quality | 98.7  |
| Sample_C3A_k141_213857             | 283688 | 233 | 2  | 187 | High-quality | 98.7  |
| Sample_C10A_k141_46207_fragment_1  | 38526  | 54  | 19 | 0   | High-quality | 98.7  |

|                                    |        |     |    |     |              |       |
|------------------------------------|--------|-----|----|-----|--------------|-------|
| Sample_C12C_k141_74287_fragment_1  | 36835  | 52  | 15 | 1   | High-quality | 98.7  |
| Sample_C11C_k141_43380_fragment_3  | 49700  | 78  | 29 | 2   | High-quality | 98.69 |
| Sample_C11B_k141_228958            | 39164  | 78  | 16 | 2   | High-quality | 98.68 |
| Sample_T7B_k141_6164               | 353131 | 289 | 2  | 200 | High-quality | 98.67 |
| Sample_T6C_k141_65311_fragment_3   | 33860  | 52  | 16 | 0   | High-quality | 98.67 |
| Sample_C13B_k141_14966             | 167319 | 153 | 1  | 128 | High-quality | 98.65 |
| Sample_T11B_k141_123292            | 180539 | 168 | 3  | 98  | High-quality | 98.62 |
| Sample_C12B_k141_105716            | 41640  | 69  | 20 | 0   | High-quality | 98.62 |
| Sample_C10A_k141_68661             | 46408  | 70  | 23 | 1   | High-quality | 98.6  |
| Sample_C3A_k141_10017              | 53020  | 84  | 20 | 5   | High-quality | 98.59 |
| Sample_C14A_k141_196082            | 28281  | 26  | 0  | 4   | High-quality | 98.58 |
| Sample_T13C_k141_15427             | 29186  | 43  | 19 | 0   | High-quality | 98.55 |
| Sample_T15B_k141_46089             | 56814  | 91  | 17 | 2   | High-quality | 98.55 |
| Sample_T11A_k141_151272_fragment_1 | 37043  | 55  | 20 | 1   | High-quality | 98.54 |
| Sample_C10B_k141_108070            | 5652   | 11  | 1  | 1   | High-quality | 98.46 |
| Sample_C9A_k141_13768_fragment_1   | 47937  | 72  | 16 | 5   | High-quality | 98.46 |
| Sample_C1C_k141_169631_fragment_1  | 38261  | 36  | 4  | 0   | High-quality | 98.44 |
| Sample_C2A_k141_88272              | 233308 | 298 | 14 | 21  | High-quality | 98.41 |
| Sample_T2B_k141_245773_fragment_1  | 59100  | 51  | 5  | 6   | High-quality | 98.4  |
| Sample_T17A_k141_4577              | 18751  | 27  | 2  | 0   | High-quality | 98.39 |
| Sample_C13C_k141_79964             | 156572 | 167 | 2  | 133 | High-quality | 98.37 |
| Sample_C7B_k141_64610_fragment_1   | 39019  | 52  | 14 | 3   | High-quality | 98.36 |
| Sample_T4C_k141_92468_fragment_2   | 134753 | 178 | 36 | 6   | High-quality | 98.35 |
| Sample_C9A_k141_22623_fragment_1   | 88359  | 95  | 24 | 5   | High-quality | 98.33 |
| Sample_C4B_k141_46019              | 41313  | 32  | 0  | 22  | High-quality | 98.3  |
| Sample_C2C_k141_188116             | 38816  | 57  | 9  | 1   | High-quality | 98.27 |
| Sample_C4C_k141_227607             | 47589  | 65  | 21 | 4   | High-quality | 98.26 |
| Sample_C4B_k141_254537             | 79205  | 123 | 21 | 4   | High-quality | 98.24 |
| Sample_T11C_k141_85717             | 188462 | 174 | 4  | 60  | High-quality | 98.23 |
| Sample_C13B_k141_57996             | 13123  | 16  | 4  | 0   | High-quality | 98.23 |
| Sample_T17C_k141_8141_fragment_2   | 173269 | 273 | 42 | 4   | High-quality | 98.21 |
| Sample_T6B_k141_152191             | 108348 | 99  | 1  | 56  | High-quality | 98.2  |
| Sample_T17B_k141_20688_fragment_1  | 40757  | 67  | 17 | 5   | High-quality | 98.18 |
| Sample_T3C_k141_84873_fragment_1   | 38698  | 49  | 7  | 0   | High-quality | 98.18 |
| Sample_T8A_k141_122726             | 65125  | 89  | 22 | 2   | High-quality | 98.18 |
| Sample_C11A_k141_21789             | 64545  | 60  | 2  | 39  | High-quality | 98.16 |
| Sample_T10A_k141_39858_fragment_1  | 38373  | 55  | 20 | 0   | High-quality | 98.16 |
| Sample_C3A_k141_242979             | 40133  | 72  | 17 | 1   | High-quality | 98.15 |
| Sample_T3B_k141_91254_fragment_1   | 42241  | 58  | 13 | 7   | High-quality | 98.13 |

|                                    |        |     |    |     |              |       |
|------------------------------------|--------|-----|----|-----|--------------|-------|
| Sample_C4B_k141_4453               | 18695  | 31  | 6  | 2   | High-quality | 98.1  |
| Sample_T4B_k141_50359              | 183188 | 180 | 1  | 102 | High-quality | 98.06 |
| Sample_C1B_k141_244261_fragment_2  | 51929  | 58  | 13 | 1   | High-quality | 98.05 |
| Sample_C8C_k141_139847_fragment_1  | 53280  | 71  | 15 | 4   | High-quality | 98.05 |
| Sample_T13A_k141_48041             | 31593  | 61  | 15 | 0   | High-quality | 98.02 |
| Sample_C8A_k141_95430_fragment_1   | 42411  | 57  | 18 | 0   | High-quality | 97.98 |
| Sample_T4B_k141_196760             | 287817 | 345 | 12 | 34  | High-quality | 97.98 |
| Sample_T2B_k141_196613             | 57113  | 81  | 13 | 2   | High-quality | 97.96 |
| Sample_T13C_k141_17830             | 13084  | 18  | 4  | 0   | High-quality | 97.94 |
| Sample_T15B_k141_113721_fragment_1 | 44283  | 51  | 2  | 4   | High-quality | 97.93 |
| Sample_T3A_k141_110712_fragment_1  | 40652  | 63  | 19 | 1   | High-quality | 97.93 |
| Sample_C8C_k141_95882              | 33137  | 52  | 18 | 0   | High-quality | 97.91 |
| Sample_T15C_k141_136462            | 65789  | 93  | 23 | 5   | High-quality | 97.88 |
| Sample_T15A_k141_114057_fragment_1 | 65293  | 93  | 13 | 7   | High-quality | 97.87 |
| Sample_C10B_k141_1724              | 36204  | 59  | 20 | 1   | High-quality | 97.84 |
| Sample_C7A_k141_77406              | 61426  | 83  | 22 | 4   | High-quality | 97.81 |
| Sample_C9A_k141_16007_fragment_1   | 30681  | 38  | 11 | 4   | High-quality | 97.8  |
| Sample_T14A_k141_74924_fragment_1  | 65107  | 100 | 29 | 2   | High-quality | 97.8  |
| Sample_T12A_k141_190546_fragment_5 | 36028  | 49  | 16 | 2   | High-quality | 97.79 |
| Sample_C2B_k141_343189             | 45294  | 77  | 18 | 0   | High-quality | 97.78 |
| Sample_C3A_k141_31824_fragment_1   | 34252  | 49  | 16 | 1   | High-quality | 97.78 |
| Sample_C11A_k141_84190             | 100490 | 178 | 28 | 1   | High-quality | 97.77 |
| Sample_T17A_k141_22903_fragment_1  | 39323  | 60  | 14 | 0   | High-quality | 97.77 |
| Sample_T11A_k141_104938_fragment_1 | 63179  | 97  | 29 | 0   | High-quality | 97.75 |
| Sample_C2B_k141_139571             | 50252  | 70  | 19 | 2   | High-quality | 97.72 |
| Sample_T11B_k141_55754_fragment_1  | 84929  | 101 | 13 | 12  | High-quality | 97.69 |
| Sample_C10A_k141_194162            | 56011  | 69  | 30 | 2   | High-quality | 97.68 |
| Sample_T11B_k141_130303            | 13048  | 16  | 4  | 0   | High-quality | 97.67 |
| Sample_C1C_k141_49705_fragment_2   | 37756  | 53  | 17 | 4   | High-quality | 97.65 |
| Sample_C9A_k141_105520_fragment_1  | 36518  | 55  | 20 | 1   | High-quality | 97.63 |
| Sample_T11B_k141_17411             | 56107  | 55  | 5  | 4   | High-quality | 97.61 |
| Sample_T3A_k141_80611              | 151625 | 147 | 1  | 102 | High-quality | 97.58 |
| Sample_T4C_k141_69330              | 197678 | 214 | 5  | 90  | High-quality | 97.58 |
| Sample_T6C_k141_223830_fragment_3  | 37806  | 41  | 8  | 0   | High-quality | 97.58 |
| Sample_T4B_k141_75764_fragment_1   | 44137  | 51  | 3  | 2   | High-quality | 97.55 |
| Sample_T8A_k141_111862             | 58502  | 97  | 20 | 2   | High-quality | 97.54 |
| Sample_C14A_k141_79774_fragment_1  | 46572  | 68  | 23 | 2   | High-quality | 97.52 |
| Sample_C1C_k141_59071              | 216233 | 228 | 3  | 148 | High-quality | 97.5  |
| Sample_C12A_k141_174271_fragment_1 | 32859  | 60  | 23 | 0   | High-quality | 97.5  |



|                                    |        |     |    |     |              |       |
|------------------------------------|--------|-----|----|-----|--------------|-------|
| Sample_T4C_k141_63506              | 40862  | 71  | 31 | 2   | High-quality | 97.5  |
| Sample_T7B_k141_34219              | 64520  | 97  | 32 | 5   | High-quality | 97.5  |
| Sample_C12C_k141_180066_fragment_2 | 30372  | 57  | 14 | 0   | High-quality | 97.48 |
| Sample_C14C_k141_59006             | 43920  | 73  | 17 | 0   | High-quality | 97.45 |
| Sample_T10B_k141_165906_fragment_2 | 34553  | 54  | 22 | 0   | High-quality | 97.44 |
| Sample_C10A_k141_168339            | 42932  | 58  | 33 | 0   | High-quality | 97.41 |
| Sample_T8C_k141_15282              | 96684  | 174 | 21 | 1   | High-quality | 97.41 |
| Sample_T15A_k141_114774_fragment_1 | 43623  | 61  | 18 | 6   | High-quality | 97.39 |
| Sample_C2A_k141_129915             | 42135  | 64  | 15 | 0   | High-quality | 97.38 |
| Sample_T11C_k141_97857_fragment_1  | 55307  | 79  | 22 | 4   | High-quality | 97.38 |
| Sample_T6C_k141_111290_fragment_2  | 28836  | 42  | 15 | 0   | High-quality | 97.38 |
| Sample_T5B_k141_44934_fragment_1   | 37389  | 51  | 14 | 3   | High-quality | 97.37 |
| Sample_C3C_k141_142500_fragment_1  | 52936  | 73  | 16 | 0   | High-quality | 97.36 |
| Sample_T12C_k141_75553             | 84456  | 112 | 13 | 1   | High-quality | 97.34 |
| Sample_C2A_k141_326487             | 33188  | 49  | 13 | 2   | High-quality | 97.33 |
| Sample_T8C_k141_113721_fragment_1  | 42059  | 51  | 15 | 4   | High-quality | 97.33 |
| Sample_T13B_k141_34116_fragment_1  | 39496  | 56  | 32 | 0   | High-quality | 97.31 |
| Sample_T18C_k141_94868             | 210877 | 211 | 3  | 118 | High-quality | 97.27 |
| Sample_C12B_k141_142768_fragment_1 | 67403  | 97  | 20 | 5   | High-quality | 97.25 |
| Sample_T13B_k141_64194_fragment_1  | 48254  | 74  | 28 | 0   | High-quality | 97.24 |
| Sample_T13C_k141_107238_fragment_1 | 39888  | 59  | 25 | 6   | High-quality | 97.23 |
| Sample_C8B_k141_27979_fragment_1   | 36051  | 53  | 30 | 1   | High-quality | 97.18 |
| Sample_C11A_k141_39455_fragment_1  | 37911  | 54  | 14 | 6   | High-quality | 97.17 |
| Sample_C14A_k141_24421             | 45916  | 59  | 18 | 7   | High-quality | 97.17 |
| Sample_C8A_k141_165788_fragment_1  | 112807 | 145 | 18 | 8   | High-quality | 97.17 |
| Sample_T14C_k141_111835_fragment_2 | 44295  | 45  | 3  | 3   | High-quality | 97.15 |
| Sample_C12C_k141_39734_fragment_4  | 100670 | 117 | 36 | 7   | High-quality | 97.1  |
| Sample_T4B_k141_303023             | 78447  | 90  | 1  | 32  | High-quality | 97.09 |
| Sample_C14A_k141_160402_fragment_2 | 43364  | 58  | 19 | 5   | High-quality | 97.09 |
| Sample_T5C_k141_111254             | 33177  | 51  | 15 | 1   | High-quality | 97.08 |
| Sample_T5A_k141_33751              | 39953  | 69  | 17 | 1   | High-quality | 97.06 |
| Sample_C13C_k141_95846             | 40523  | 64  | 14 | 3   | High-quality | 97.05 |
| Sample_T13C_k141_88200_fragment_1  | 47959  | 67  | 30 | 0   | High-quality | 97.05 |
| Sample_C14C_k141_81950_fragment_1  | 39119  | 56  | 21 | 0   | High-quality | 96.93 |
| Sample_T4B_k141_118753             | 202394 | 240 | 11 | 14  | High-quality | 96.93 |
| Sample_C2A_k141_129866             | 141535 | 124 | 1  | 86  | High-quality | 96.91 |
| Sample_C3B_k141_22762              | 317395 | 403 | 10 | 29  | High-quality | 96.89 |
| Sample_T14A_k141_192459_fragment_1 | 33738  | 53  | 20 | 0   | High-quality | 96.89 |
| Sample_C12A_k141_184915            | 64432  | 70  | 3  | 43  | High-quality | 96.88 |

|                                    |        |     |    |     |              |       |
|------------------------------------|--------|-----|----|-----|--------------|-------|
| Sample_C1B_k141_138451             | 79396  | 95  | 13 | 0   | High-quality | 96.83 |
| Sample_C7B_k141_154868             | 76404  | 134 | 16 | 3   | High-quality | 96.82 |
| Sample_T6B_k141_44265_fragment_1   | 63264  | 90  | 13 | 5   | High-quality | 96.8  |
| Sample_T4B_k141_41114              | 34318  | 50  | 15 | 1   | High-quality | 96.76 |
| Sample_C4B_k141_82947_fragment_1   | 50321  | 71  | 18 | 1   | High-quality | 96.75 |
| Sample_C13C_k141_67174             | 178372 | 142 | 1  | 106 | High-quality | 96.74 |
| Sample_T2C_k141_67460_fragment_2   | 32515  | 48  | 13 | 2   | High-quality | 96.74 |
| Sample_C6A_k141_148773_fragment_1  | 47668  | 63  | 20 | 1   | High-quality | 96.68 |
| Sample_T13A_k141_75046_fragment_1  | 142250 | 197 | 41 | 3   | High-quality | 96.6  |
| Sample_T12A_k141_77574_fragment_2  | 30124  | 56  | 17 | 0   | High-quality | 96.57 |
| Sample_C10A_k141_243259            | 41646  | 72  | 16 | 5   | High-quality | 96.55 |
| Sample_C11A_k141_83652             | 81378  | 139 | 17 | 1   | High-quality | 96.55 |
| Sample_C6A_k141_129111_fragment_1  | 52830  | 81  | 21 | 3   | High-quality | 96.51 |
| Sample_T4A_k141_64317              | 64709  | 89  | 13 | 5   | High-quality | 96.51 |
| Sample_T13B_k141_85007_fragment_1  | 46417  | 63  | 27 | 6   | High-quality | 96.45 |
| Sample_T14A_k141_159142            | 13190  | 17  | 4  | 0   | High-quality | 96.45 |
| Sample_C11A_k141_183850            | 99045  | 95  | 2  | 31  | High-quality | 96.43 |
| Sample_C2C_k141_224837             | 40030  | 75  | 20 | 4   | High-quality | 96.42 |
| Sample_T6B_k141_122698             | 5891   | 7   | 4  | 0   | High-quality | 96.42 |
| Sample_C10A_k141_283124_fragment_1 | 41073  | 57  | 28 | 2   | High-quality | 96.37 |
| Sample_T13B_k141_99329             | 19774  | 26  | 5  | 5   | High-quality | 96.32 |
| Sample_T10B_k141_94041_fragment_1  | 47092  | 73  | 20 | 2   | High-quality | 96.32 |
| Sample_C10A_k141_107111_fragment_1 | 40761  | 60  | 24 | 0   | High-quality | 96.29 |
| Sample_T15C_k141_77534_fragment_3  | 66294  | 88  | 13 | 3   | High-quality | 96.29 |
| Sample_T12C_k141_39915_fragment_1  | 55881  | 86  | 16 | 2   | High-quality | 96.26 |
| Sample_T8B_k141_167481             | 14887  | 17  | 1  | 0   | High-quality | 96.21 |
| Sample_T4B_k141_1449               | 293083 | 235 | 3  | 151 | High-quality | 96.18 |
| Sample_T4B_k141_168818             | 40240  | 71  | 21 | 0   | High-quality | 96.12 |
| Sample_T5C_k141_60686              | 230412 | 206 | 3  | 116 | High-quality | 96.11 |
| Sample_C14B_k141_19598_fragment_1  | 58661  | 86  | 25 | 3   | High-quality | 96.1  |
| Sample_T12C_k141_6537              | 13096  | 17  | 4  | 0   | High-quality | 96.1  |
| Sample_T17B_k141_11328_fragment_1  | 37210  | 55  | 13 | 0   | High-quality | 96.1  |
| Sample_T8B_k141_22749              | 56275  | 101 | 20 | 0   | High-quality | 96.07 |
| Sample_C11C_k141_120295            | 6556   | 8   | 3  | 0   | High-quality | 96.04 |
| Sample_T18B_k141_78754             | 39919  | 49  | 22 | 3   | High-quality | 96.01 |
| Sample_T3A_k141_78848              | 39777  | 69  | 16 | 0   | High-quality | 95.99 |
| Sample_C8C_k141_69656_fragment_2   | 46454  | 49  | 6  | 3   | High-quality | 95.97 |
| Sample_C14A_k141_157372_fragment_2 | 79001  | 89  | 24 | 2   | High-quality | 95.96 |
| Sample_T8B_k141_196088             | 52798  | 70  | 19 | 3   | High-quality | 95.96 |

|                                    |        |     |    |     |              |       |
|------------------------------------|--------|-----|----|-----|--------------|-------|
| Sample_T3C_k141_28820              | 244241 | 213 | 4  | 141 | High-quality | 95.94 |
| Sample_C11C_k141_173719_fragment_1 | 34761  | 51  | 15 | 1   | High-quality | 95.9  |
| Sample_T16B_k141_18941             | 36397  | 38  | 6  | 1   | High-quality | 95.87 |
| Sample_C10B_k141_29481             | 79838  | 74  | 5  | 22  | High-quality | 95.85 |
| Sample_T12A_k141_75688_fragment_1  | 49543  | 80  | 21 | 2   | High-quality | 95.85 |
| Sample_T2C_k141_19497_fragment_2   | 56859  | 66  | 20 | 3   | High-quality | 95.8  |
| Sample_C1C_k141_2084_fragment_1    | 128059 | 184 | 31 | 0   | High-quality | 95.79 |
| Sample_T5A_k141_7150_fragment_2    | 14843  | 23  | 2  | 1   | High-quality | 95.78 |
| Sample_T17B_k141_10966_fragment_1  | 44169  | 62  | 38 | 0   | High-quality | 95.69 |
| Sample_T5C_k141_41360_fragment_1   | 45693  | 62  | 7  | 4   | High-quality | 95.68 |
| Sample_C4A_k141_93819_fragment_1   | 41956  | 54  | 20 | 3   | High-quality | 95.65 |
| Sample_C4C_k141_57566_fragment_1   | 35240  | 49  | 16 | 2   | High-quality | 95.65 |
| Sample_T6B_k141_83017_fragment_1   | 105976 | 133 | 14 | 3   | High-quality | 95.62 |
| Sample_C10C_k141_1286              | 40370  | 41  | 0  | 16  | High-quality | 95.59 |
| Sample_C13A_k141_14544             | 181434 | 169 | 1  | 120 | High-quality | 95.57 |
| Sample_C11C_k141_113834            | 40031  | 54  | 23 | 1   | High-quality | 95.52 |
| Sample_T18A_k141_92894             | 73237  | 68  | 5  | 7   | High-quality | 95.51 |
| Sample_T18B_k141_141006            | 50974  | 78  | 27 | 0   | High-quality | 95.51 |
| Sample_T5B_k141_59199_fragment_1   | 50589  | 59  | 27 | 8   | High-quality | 95.51 |
| Sample_C8C_k141_3791_fragment_1    | 41819  | 47  | 7  | 0   | High-quality | 95.49 |
| Sample_C4B_k141_23689_fragment_1   | 16041  | 26  | 7  | 0   | High-quality | 95.47 |
| Sample_T18C_k141_82937_fragment_2  | 68575  | 90  | 23 | 7   | High-quality | 95.46 |
| Sample_C11C_k141_187492            | 6917   | 8   | 3  | 1   | High-quality | 95.44 |
| Sample_T13B_k141_111723            | 39741  | 57  | 21 | 0   | High-quality | 95.42 |
| Sample_C14C_k141_154327            | 87693  | 104 | 12 | 18  | High-quality | 95.37 |
| Sample_T2B_k141_27301_fragment_2   | 197521 | 209 | 3  | 27  | High-quality | 95.31 |
| Sample_C13A_k141_48859             | 214472 | 188 | 3  | 125 | High-quality | 95.29 |
| Sample_C1C_k141_50529_fragment_1   | 46259  | 70  | 23 | 1   | High-quality | 95.29 |
| Sample_T5C_k141_28092_fragment_1   | 45928  | 66  | 21 | 1   | High-quality | 95.27 |
| Sample_T5A_k141_44607              | 41503  | 80  | 20 | 0   | High-quality | 95.21 |
| Sample_C12B_k141_56025_fragment_1  | 37635  | 57  | 15 | 6   | High-quality | 95.15 |
| Sample_T12C_k141_79893             | 99168  | 119 | 11 | 2   | High-quality | 95.14 |
| Sample_C7A_k141_25121_fragment_1   | 57534  | 65  | 29 | 1   | High-quality | 95.13 |
| Sample_T12A_k141_108674            | 35172  | 52  | 11 | 2   | High-quality | 95.1  |
| Sample_C11A_k141_45944             | 56875  | 81  | 31 | 0   | High-quality | 95.05 |
| Sample_T14A_k141_147625_fragment_1 | 61298  | 94  | 27 | 5   | High-quality | 95.05 |
| Sample_C5A_k141_208982             | 46909  | 66  | 17 | 1   | High-quality | 95.03 |
| Sample_C11B_k141_69133             | 188052 | 136 | 1  | 99  | High-quality | 95.01 |
| Sample_T14C_k141_11679_fragment_1  | 39472  | 51  | 4  | 0   | High-quality | 95.01 |

|                                    |        |     |    |     |              |       |
|------------------------------------|--------|-----|----|-----|--------------|-------|
| Sample_T18A_k141_43633_fragment_1  | 38631  | 59  | 21 | 0   | High-quality | 95.01 |
| Sample_C8B_k141_11746_fragment_1   | 38150  | 52  | 21 | 0   | High-quality | 94.96 |
| Sample_T8A_k141_169132             | 46952  | 69  | 27 | 1   | High-quality | 94.95 |
| Sample_T5B_k141_11379_fragment_1   | 30804  | 46  | 13 | 1   | High-quality | 94.94 |
| Sample_C12A_k141_120292_fragment_2 | 60415  | 82  | 15 | 5   | High-quality | 94.89 |
| Sample_C13A_k141_113447_fragment_2 | 18082  | 26  | 2  | 0   | High-quality | 94.88 |
| Sample_T12C_k141_35132             | 33488  | 54  | 18 | 1   | High-quality | 94.88 |
| Sample_T13B_k141_77557_fragment_1  | 48613  | 60  | 24 | 7   | High-quality | 94.86 |
| Sample_T3C_k141_14860_fragment_3   | 36428  | 46  | 18 | 0   | High-quality | 94.83 |
| Sample_T17C_k141_789_fragment_3    | 37986  | 55  | 13 | 3   | High-quality | 94.81 |
| Sample_C5A_k141_122136             | 206558 | 199 | 2  | 121 | High-quality | 94.77 |
| Sample_T10C_k141_55895             | 103215 | 154 | 18 | 1   | High-quality | 94.76 |
| Sample_T10B_k141_63341_fragment_1  | 39653  | 54  | 21 | 1   | High-quality | 94.74 |
| Sample_T7A_k141_77584_fragment_2   | 51447  | 82  | 18 | 3   | High-quality | 94.74 |
| Sample_C11B_k141_169387            | 34732  | 49  | 9  | 1   | High-quality | 94.67 |
| Sample_C2B_k141_14652              | 43321  | 82  | 24 | 0   | High-quality | 94.66 |
| Sample_C2B_k141_178144             | 56105  | 76  | 31 | 0   | High-quality | 94.6  |
| Sample_T5C_k141_66503              | 99733  | 113 | 2  | 11  | High-quality | 94.59 |
| Sample_C10A_k141_66913             | 149892 | 128 | 1  | 74  | High-quality | 94.58 |
| Sample_C1A_k141_28638              | 315808 | 292 | 4  | 201 | High-quality | 94.58 |
| Sample_T13A_k141_50134_fragment_1  | 61413  | 101 | 24 | 1   | High-quality | 94.55 |
| Sample_T3B_k141_4559               | 37052  | 51  | 10 | 0   | High-quality | 94.55 |
| Sample_C14A_k141_168150            | 44272  | 65  | 21 | 1   | High-quality | 94.5  |
| Sample_C12A_k141_185732            | 177837 | 183 | 1  | 119 | High-quality | 94.49 |
| Sample_T5C_k141_63527              | 42345  | 43  | 5  | 4   | High-quality | 94.47 |
| Sample_C3A_k141_110020_fragment_1  | 149514 | 164 | 7  | 19  | High-quality | 94.46 |
| Sample_C11B_k141_56766_fragment_1  | 49201  | 52  | 26 | 1   | High-quality | 94.45 |
| Sample_C3C_k141_62753              | 46476  | 54  | 9  | 6   | High-quality | 94.44 |
| Sample_C6C_k141_115044             | 53960  | 95  | 13 | 1   | High-quality | 94.43 |
| Sample_C8C_k141_126373             | 60457  | 43  | 1  | 33  | High-quality | 94.41 |
| Sample_T15A_k141_35712             | 38488  | 54  | 16 | 0   | High-quality | 94.39 |
| Sample_T2A_k141_225750             | 174003 | 155 | 1  | 57  | High-quality | 94.38 |
| Sample_C14A_k141_53676             | 15890  | 19  | 2  | 1   | High-quality | 94.36 |
| Sample_T13B_k141_68497_fragment_1  | 37896  | 48  | 32 | 3   | High-quality | 94.36 |
| Sample_C4C_k141_63860              | 84867  | 62  | 0  | 43  | High-quality | 94.3  |
| Sample_C7B_k141_141831             | 21361  | 35  | 3  | 4   | High-quality | 94.3  |
| Sample_T8C_k141_152747             | 14592  | 16  | 0  | 1   | High-quality | 94.29 |
| Sample_T2A_k141_2964               | 43115  | 60  | 14 | 0   | High-quality | 94.25 |
| Sample_T5B_k141_34147              | 75997  | 104 | 23 | 5   | High-quality | 94.25 |

|                                    |        |     |    |     |              |       |
|------------------------------------|--------|-----|----|-----|--------------|-------|
| Sample_T2C_k141_93502_fragment_1   | 38676  | 55  | 18 | 2   | High-quality | 94.21 |
| Sample_T10B_k141_110985            | 57198  | 78  | 21 | 12  | High-quality | 94.12 |
| Sample_T5B_k141_75400_fragment_1   | 49137  | 51  | 5  | 1   | High-quality | 94.11 |
| Sample_C3A_k141_132196_fragment_1  | 69286  | 76  | 4  | 10  | High-quality | 94.07 |
| Sample_C3B_k141_165550_fragment_2  | 32469  | 49  | 15 | 0   | High-quality | 94.07 |
| Sample_T2C_k141_55412              | 42507  | 66  | 19 | 0   | High-quality | 94.03 |
| Sample_T8C_k141_44672_fragment_1   | 32553  | 51  | 20 | 1   | High-quality | 94.03 |
| Sample_C13A_k141_81830             | 104651 | 105 | 4  | 47  | High-quality | 94.01 |
| Sample_C6B_k141_203635             | 74767  | 60  | 0  | 12  | High-quality | 93.99 |
| Sample_C7C_k141_61017_fragment_1   | 36671  | 48  | 20 | 1   | High-quality | 93.99 |
| Sample_C1B_k141_106541             | 32141  | 48  | 13 | 4   | High-quality | 93.97 |
| Sample_C10A_k141_306856_fragment_1 | 70654  | 76  | 9  | 8   | High-quality | 93.94 |
| Sample_T1A_k141_10294              | 107661 | 121 | 34 | 2   | High-quality | 93.94 |
| Sample_T16C_k141_89252_fragment_3  | 62015  | 85  | 16 | 5   | High-quality | 93.92 |
| Sample_T3A_k141_135581             | 13044  | 19  | 5  | 0   | High-quality | 93.92 |
| Sample_T10B_k141_67047_fragment_4  | 265997 | 372 | 12 | 24  | High-quality | 93.9  |
| Sample_C5A_k141_1888               | 42256  | 66  | 17 | 0   | High-quality | 93.89 |
| Sample_C14C_k141_77058             | 33927  | 46  | 20 | 0   | High-quality | 93.87 |
| Sample_C3A_k141_259430_fragment_1  | 36502  | 45  | 32 | 2   | High-quality | 93.8  |
| Sample_C1C_k141_39922              | 191708 | 160 | 3  | 103 | High-quality | 93.78 |
| Sample_T2A_k141_54976              | 149577 | 157 | 3  | 95  | High-quality | 93.78 |
| Sample_C9A_k141_24615_fragment_1   | 35879  | 46  | 14 | 0   | High-quality | 93.77 |
| Sample_T13B_k141_136019_fragment_1 | 38715  | 53  | 22 | 2   | High-quality | 93.72 |
| Sample_C5A_k141_74556              | 132364 | 134 | 2  | 73  | High-quality | 93.68 |
| Sample_T12B_k141_115067            | 33690  | 54  | 22 | 0   | High-quality | 93.66 |
| Sample_T13C_k141_53604_fragment_1  | 47220  | 59  | 19 | 2   | High-quality | 93.58 |
| Sample_T7A_k141_126017             | 54389  | 75  | 18 | 4   | High-quality | 93.58 |
| Sample_C9A_k141_54863              | 42847  | 41  | 2  | 1   | High-quality | 93.55 |
| Sample_C11A_k141_102157_fragment_3 | 45100  | 69  | 20 | 2   | High-quality | 93.53 |
| Sample_C6C_k141_214905             | 46657  | 53  | 18 | 3   | High-quality | 93.48 |
| Sample_C10C_k141_211157_fragment_2 | 56377  | 79  | 15 | 1   | High-quality | 93.41 |
| Sample_C14B_k141_25233             | 35285  | 48  | 17 | 0   | High-quality | 93.41 |
| Sample_C11B_k141_21663_fragment_1  | 54394  | 99  | 23 | 0   | High-quality | 93.39 |
| Sample_T2B_k141_208679             | 200711 | 149 | 2  | 119 | High-quality | 93.31 |
| Sample_C10B_k141_111501_fragment_1 | 51310  | 58  | 7  | 7   | High-quality | 93.3  |
| Sample_C4B_k141_165352             | 5235   | 5   | 0  | 1   | High-quality | 93.22 |
| Sample_T2C_k141_148008_fragment_1  | 43966  | 57  | 24 | 3   | High-quality | 93.2  |
| Sample_T11C_k141_124121_fragment_2 | 40302  | 62  | 28 | 0   | High-quality | 93.12 |
| Sample_C7B_k141_109589_fragment_1  | 61295  | 87  | 11 | 8   | High-quality | 93.11 |

|                                    |        |     |    |     |              |       |
|------------------------------------|--------|-----|----|-----|--------------|-------|
| Sample_T11B_k141_17133_fragment_1  | 32902  | 50  | 17 | 3   | High-quality | 93.04 |
| Sample_T1A_k141_6836               | 41178  | 54  | 23 | 4   | High-quality | 93.02 |
| Sample_C11A_k141_51947             | 43534  | 42  | 7  | 2   | High-quality | 93.01 |
| Sample_C12B_k141_115450            | 13313  | 20  | 3  | 1   | High-quality | 93.01 |
| Sample_T11C_k141_50232_fragment_1  | 58127  | 87  | 18 | 0   | High-quality | 93.01 |
| Sample_T16A_k141_62093_fragment_1  | 54746  | 86  | 25 | 4   | High-quality | 93.01 |
| Sample_T3C_k141_133467_fragment_1  | 60454  | 69  | 21 | 10  | High-quality | 92.99 |
| Sample_C6C_k141_52784_fragment_1   | 53613  | 65  | 24 | 8   | High-quality | 92.98 |
| Sample_C10A_k141_280900_fragment_1 | 39055  | 60  | 19 | 0   | High-quality | 92.96 |
| Sample_C13C_k141_94466_fragment_2  | 12136  | 20  | 2  | 0   | High-quality | 92.95 |
| Sample_C10B_k141_71011             | 35354  | 48  | 23 | 0   | High-quality | 92.94 |
| Sample_C14C_k141_160588_fragment_5 | 34020  | 45  | 5  | 2   | High-quality | 92.8  |
| Sample_C5A_k141_198515_fragment_2  | 82157  | 113 | 20 | 13  | High-quality | 92.72 |
| Sample_T4B_k141_327358_fragment_3  | 44805  | 74  | 15 | 6   | High-quality | 92.66 |
| Sample_T8A_k141_235691_fragment_1  | 37332  | 59  | 18 | 2   | High-quality | 92.64 |
| Sample_T11A_k141_40225             | 292940 | 235 | 3  | 173 | High-quality | 92.61 |
| Sample_T10B_k141_84318             | 42468  | 60  | 26 | 1   | High-quality | 92.55 |
| Sample_T2A_k141_241183_fragment_2  | 37072  | 55  | 12 | 0   | High-quality | 92.53 |
| Sample_T7A_k141_125965_fragment_1  | 44870  | 50  | 24 | 2   | High-quality | 92.53 |
| Sample_T12A_k141_195205_fragment_2 | 44845  | 60  | 9  | 0   | High-quality | 92.49 |
| Sample_C1C_k141_16632_fragment_1   | 96618  | 169 | 24 | 11  | High-quality | 92.46 |
| Sample_C13C_k141_70322             | 32041  | 15  | 1  | 4   | High-quality | 92.4  |
| Sample_C2A_k141_235023_fragment_2  | 104048 | 166 | 35 | 5   | High-quality | 92.37 |
| Sample_C2B_k141_256757_fragment_2  | 40517  | 59  | 21 | 3   | High-quality | 92.36 |
| Sample_T11C_k141_90820_fragment_1  | 29940  | 47  | 14 | 1   | High-quality | 92.25 |
| Sample_C3C_k141_244244_fragment_2  | 40387  | 42  | 24 | 1   | High-quality | 92.24 |
| Sample_C7B_k141_7029               | 38886  | 59  | 17 | 3   | High-quality | 92.24 |
| Sample_C13C_k141_35877             | 32134  | 49  | 13 | 1   | High-quality | 92.22 |
| Sample_C7A_k141_155146_fragment_2  | 44475  | 61  | 22 | 1   | High-quality | 92.22 |
| Sample_T5C_k141_11084              | 17560  | 26  | 6  | 0   | High-quality | 92.21 |
| Sample_T6A_k141_15920              | 49412  | 65  | 13 | 9   | High-quality | 92.21 |
| Sample_T10A_k141_27819_fragment_3  | 45739  | 52  | 9  | 5   | High-quality | 92.19 |
| Sample_T12B_k141_94405_fragment_1  | 39205  | 62  | 29 | 1   | High-quality | 92.19 |
| Sample_C13C_k141_13326_fragment_1  | 43508  | 61  | 27 | 2   | High-quality | 92.16 |
| Sample_C8B_k141_154874             | 15673  | 20  | 7  | 1   | High-quality | 92.14 |
| Sample_T14A_k141_74898             | 37472  | 33  | 5  | 1   | High-quality | 92.11 |
| Sample_C8C_k141_167785_fragment_1  | 36530  | 53  | 24 | 0   | High-quality | 92.08 |
| Sample_C11B_k141_95000             | 85902  | 88  | 2  | 29  | High-quality | 92.06 |
| Sample_T16B_k141_89977             | 35926  | 47  | 19 | 0   | High-quality | 92.06 |

|                                    |        |     |    |     |              |       |
|------------------------------------|--------|-----|----|-----|--------------|-------|
| Sample_C3B_k141_100921             | 88347  | 85  | 9  | 0   | High-quality | 92.01 |
| Sample_C6C_k141_49430_fragment_1   | 42513  | 53  | 22 | 2   | High-quality | 92    |
| Sample_T8A_k141_219986_fragment_2  | 42586  | 56  | 27 | 1   | High-quality | 92    |
| Sample_T2B_k141_76576_fragment_1   | 34772  | 43  | 16 | 0   | High-quality | 91.98 |
| Sample_C13B_k141_72647_fragment_1  | 36173  | 52  | 19 | 0   | High-quality | 91.94 |
| Sample_C2A_k141_301323             | 26507  | 34  | 10 | 0   | High-quality | 91.89 |
| Sample_C12A_k141_194182_fragment_2 | 17505  | 26  | 3  | 0   | High-quality | 91.86 |
| Sample_T4B_k141_185956             | 42038  | 56  | 31 | 0   | High-quality | 91.76 |
| Sample_C11B_k141_238532            | 42460  | 60  | 36 | 0   | High-quality | 91.74 |
| Sample_C3A_k141_54716_fragment_1   | 46205  | 64  | 22 | 5   | High-quality | 91.73 |
| Sample_T4B_k141_112724_fragment_1  | 30831  | 38  | 10 | 0   | High-quality | 91.71 |
| Sample_T17A_k141_6914              | 10785  | 17  | 5  | 0   | High-quality | 91.63 |
| Sample_C8C_k141_5976_fragment_1    | 31908  | 34  | 1  | 5   | High-quality | 91.59 |
| Sample_T4C_k141_16588_fragment_1   | 52734  | 69  | 19 | 7   | High-quality | 91.55 |
| Sample_T15C_k141_32935             | 32156  | 45  | 18 | 1   | High-quality | 91.52 |
| Sample_C12A_k141_20803             | 32590  | 46  | 14 | 2   | High-quality | 91.51 |
| Sample_C14A_k141_54912             | 35709  | 50  | 13 | 1   | High-quality | 91.51 |
| Sample_T11B_k141_49665_fragment_3  | 45125  | 62  | 20 | 5   | High-quality | 91.47 |
| Sample_C12A_k141_162714_fragment_1 | 30040  | 47  | 19 | 0   | High-quality | 91.43 |
| Sample_T11C_k141_52353_fragment_2  | 32038  | 44  | 18 | 0   | High-quality | 91.41 |
| Sample_T7B_k141_152843_fragment_1  | 32272  | 40  | 19 | 0   | High-quality | 91.41 |
| Sample_T2A_k141_38359_fragment_1   | 49705  | 68  | 22 | 4   | High-quality | 91.4  |
| Sample_T16B_k141_125657_fragment_1 | 38996  | 51  | 12 | 3   | High-quality | 91.36 |
| Sample_T14A_k141_58246_fragment_3  | 35362  | 38  | 6  | 0   | High-quality | 91.28 |
| Sample_C9C_k141_71985_fragment_2   | 42460  | 59  | 29 | 5   | High-quality | 91.23 |
| Sample_T14C_k141_96655_fragment_2  | 45214  | 57  | 13 | 1   | High-quality | 91.23 |
| Sample_C2C_k141_263854             | 38339  | 38  | 0  | 19  | High-quality | 91.22 |
| Sample_C1B_k141_34173_fragment_1   | 34984  | 50  | 18 | 1   | High-quality | 91.15 |
| Sample_T4C_k141_92186_fragment_1   | 35828  | 48  | 20 | 3   | High-quality | 91.12 |
| Sample_T4A_k141_110256             | 40962  | 54  | 28 | 0   | High-quality | 91.08 |
| Sample_T13C_k141_73612_fragment_1  | 51613  | 62  | 19 | 4   | High-quality | 91.01 |
| Sample_T5C_k141_85959              | 175864 | 143 | 3  | 96  | High-quality | 90.99 |
| Sample_T3C_k141_58140_fragment_2   | 53397  | 77  | 30 | 5   | High-quality | 90.94 |
| Sample_T5A_k141_31574              | 36397  | 68  | 24 | 0   | High-quality | 90.94 |
| Sample_C7B_k141_75906_fragment_3   | 36201  | 58  | 19 | 1   | High-quality | 90.9  |
| Sample_T14C_k141_13322             | 148043 | 141 | 1  | 87  | High-quality | 90.86 |
| Sample_C13C_k141_45372             | 39749  | 51  | 25 | 0   | High-quality | 90.86 |
| Sample_T6A_k141_124644             | 281975 | 223 | 2  | 157 | High-quality | 90.81 |
| Sample_T2C_k141_102710_fragment_1  | 42914  | 63  | 17 | 2   | High-quality | 90.81 |

|                                    |        |     |    |     |                |       |
|------------------------------------|--------|-----|----|-----|----------------|-------|
| Sample_C6B_k141_35192_fragment_1   | 46855  | 63  | 18 | 5   | High-quality   | 90.78 |
| Sample_T16B_k141_13168_fragment_1  | 76878  | 102 | 16 | 17  | High-quality   | 90.69 |
| Sample_T16C_k141_12360_fragment_1  | 34411  | 52  | 22 | 0   | High-quality   | 90.69 |
| Sample_T5B_k141_14771              | 161881 | 109 | 1  | 71  | High-quality   | 90.67 |
| Sample_T12A_k141_311794_fragment_1 | 43246  | 40  | 6  | 2   | High-quality   | 90.66 |
| Sample_T8B_k141_101301_fragment_1  | 33853  | 67  | 16 | 0   | High-quality   | 90.65 |
| Sample_T13A_k141_122128            | 184798 | 178 | 1  | 73  | High-quality   | 90.64 |
| Sample_T15A_k141_6238              | 104241 | 95  | 2  | 29  | High-quality   | 90.64 |
| Sample_T14B_k141_121326            | 61270  | 81  | 13 | 5   | High-quality   | 90.61 |
| Sample_T18C_k141_118782_fragment_1 | 45528  | 64  | 18 | 1   | High-quality   | 90.61 |
| Sample_T8C_k141_160850_fragment_1  | 56110  | 93  | 19 | 5   | High-quality   | 90.6  |
| Sample_C11B_k141_123152            | 16768  | 21  | 9  | 0   | High-quality   | 90.55 |
| Sample_T4A_k141_7468               | 280203 | 196 | 2  | 138 | High-quality   | 90.53 |
| Sample_C8B_k141_143762_fragment_1  | 41779  | 62  | 30 | 0   | High-quality   | 90.53 |
| Sample_T2C_k141_86497              | 16714  | 22  | 9  | 0   | High-quality   | 90.53 |
| Sample_T2C_k141_134103_fragment_2  | 31242  | 43  | 14 | 0   | High-quality   | 90.52 |
| Sample_C3C_k141_7977_fragment_1    | 39353  | 61  | 26 | 1   | High-quality   | 90.48 |
| Sample_T13B_k141_132107            | 386648 | 372 | 2  | 209 | High-quality   | 90.45 |
| Sample_C10C_k141_139764_fragment_1 | 36703  | 58  | 28 | 0   | High-quality   | 90.44 |
| Sample_T16B_k141_148332            | 10694  | 18  | 5  | 1   | High-quality   | 90.41 |
| Sample_T11C_k141_146798_fragment_2 | 49389  | 64  | 27 | 7   | High-quality   | 90.39 |
| Sample_C12A_k141_26735             | 44940  | 69  | 20 | 3   | High-quality   | 90.33 |
| Sample_C12B_k141_69871             | 168641 | 165 | 1  | 87  | High-quality   | 90.28 |
| Sample_C9B_k141_107392             | 7278   | 10  | 1  | 0   | High-quality   | 90.25 |
| Sample_C14A_k141_5807_fragment_1   | 54545  | 88  | 29 | 0   | High-quality   | 90.24 |
| Sample_T4A_k141_40582              | 34987  | 53  | 19 | 0   | High-quality   | 90.18 |
| Sample_T14C_k141_127299_fragment_1 | 54833  | 59  | 4  | 6   | High-quality   | 90.13 |
| Sample_T4B_k141_60928_fragment_2   | 44797  | 52  | 3  | 4   | High-quality   | 90.11 |
| Sample_C8C_k141_80137_fragment_1   | 32502  | 43  | 21 | 1   | High-quality   | 90.01 |
| Sample_C7C_k141_105742_fragment_1  | 44432  | 66  | 26 | 5   | High-quality   | 90    |
| Sample_C2C_k141_195050             | 5850   | 8   | 2  | 0   | Medium-quality | 89.94 |
| Sample_T16B_k141_150745            | 33558  | 53  | 20 | 1   | Medium-quality | 89.88 |
| Sample_T2C_k141_183655_fragment_1  | 31904  | 40  | 21 | 1   | Medium-quality | 89.83 |
| Sample_T6A_k141_289730_fragment_1  | 43959  | 60  | 21 | 3   | Medium-quality | 89.8  |
| Sample_T6A_k141_229124_fragment_1  | 56915  | 83  | 35 | 3   | Medium-quality | 89.74 |
| Sample_T12A_k141_109632            | 13179  | 22  | 3  | 0   | Medium-quality | 89.73 |
| Sample_T12C_k141_17897_fragment_1  | 37452  | 51  | 26 | 0   | Medium-quality | 89.72 |
| Sample_C10C_k141_47522             | 37536  | 58  | 16 | 1   | Medium-quality | 89.71 |
| Sample_C11C_k141_156664_fragment_1 | 30612  | 48  | 19 | 1   | Medium-quality | 89.63 |



|                                    |        |     |    |     |                |       |
|------------------------------------|--------|-----|----|-----|----------------|-------|
| Sample_T12A_k141_4371              | 52485  | 83  | 24 | 6   | Medium-quality | 89.62 |
| Sample_T2B_k141_219399_fragment_1  | 49537  | 72  | 20 | 1   | Medium-quality | 89.59 |
| Sample_T7A_k141_102421_fragment_1  | 41043  | 53  | 39 | 0   | Medium-quality | 89.58 |
| Sample_C13C_k141_101670            | 11056  | 15  | 1  | 0   | Medium-quality | 89.55 |
| Sample_C2B_k141_234098             | 13555  | 18  | 1  | 2   | Medium-quality | 89.54 |
| Sample_C8C_k141_92789_fragment_1   | 42727  | 59  | 10 | 4   | Medium-quality | 89.54 |
| Sample_T13C_k141_91629_fragment_1  | 34997  | 57  | 18 | 0   | Medium-quality | 89.54 |
| Sample_T5C_k141_131122             | 5461   | 7   | 4  | 0   | Medium-quality | 89.51 |
| Sample_T6C_k141_28187              | 48505  | 75  | 20 | 0   | Medium-quality | 89.5  |
| Sample_C5A_k141_52102              | 33068  | 48  | 19 | 0   | Medium-quality | 89.48 |
| Sample_T15A_k141_112179            | 13640  | 16  | 2  | 1   | Medium-quality | 89.47 |
| Sample_T4A_k141_68324              | 63099  | 61  | 2  | 15  | Medium-quality | 89.41 |
| Sample_T13C_k141_7517_fragment_2   | 30859  | 44  | 13 | 1   | Medium-quality | 89.41 |
| Sample_T12A_k141_297679            | 35085  | 62  | 13 | 0   | Medium-quality | 89.37 |
| Sample_T4B_k141_291602             | 33000  | 54  | 16 | 0   | Medium-quality | 89.37 |
| Sample_T11A_k141_87512_fragment_1  | 44612  | 81  | 23 | 1   | Medium-quality | 89.29 |
| Sample_T12C_k141_130806            | 151182 | 188 | 8  | 11  | Medium-quality | 89.28 |
| Sample_C6C_k141_4094               | 14959  | 24  | 6  | 0   | Medium-quality | 89.23 |
| Sample_T8C_k141_6231_fragment_1    | 32441  | 49  | 16 | 2   | Medium-quality | 89.22 |
| Sample_T3B_k141_56917              | 77849  | 87  | 23 | 3   | Medium-quality | 89.21 |
| Sample_T5C_k141_182659_fragment_2  | 35243  | 44  | 19 | 1   | Medium-quality | 89.2  |
| Sample_C4B_k141_138888_fragment_1  | 35947  | 41  | 23 | 0   | Medium-quality | 89.16 |
| Sample_C4A_k141_143780             | 670344 | 608 | 2  | 481 | Medium-quality | 89.15 |
| Sample_C13A_k141_78897             | 45970  | 61  | 11 | 5   | Medium-quality | 89.15 |
| Sample_T2B_k141_40071              | 37371  | 46  | 9  | 1   | Medium-quality | 89.13 |
| Sample_C13C_k141_111306_fragment_1 | 39015  | 41  | 23 | 0   | Medium-quality | 89.11 |
| Sample_C14C_k141_44601             | 38803  | 52  | 28 | 1   | Medium-quality | 89.05 |
| Sample_T4B_k141_150947             | 192186 | 157 | 3  | 75  | Medium-quality | 89.02 |
| Sample_T15A_k141_173738_fragment_1 | 44146  | 63  | 17 | 1   | Medium-quality | 89.02 |
| Sample_T2A_k141_84521              | 150868 | 223 | 35 | 3   | Medium-quality | 88.94 |
| Sample_C5A_k141_1290               | 144297 | 138 | 1  | 89  | Medium-quality | 88.93 |
| Sample_T15B_k141_97166             | 40004  | 46  | 1  | 27  | Medium-quality | 88.91 |
| Sample_T3B_k141_44490_fragment_1   | 31908  | 45  | 16 | 1   | Medium-quality | 88.91 |
| Sample_C3C_k141_222114             | 186098 | 187 | 3  | 120 | Medium-quality | 88.89 |
| Sample_T6C_k141_120982_fragment_1  | 46933  | 66  | 17 | 6   | Medium-quality | 88.89 |
| Sample_C4C_k141_77872_fragment_1   | 38755  | 53  | 16 | 2   | Medium-quality | 88.85 |
| Sample_T6B_k141_20430_fragment_1   | 38868  | 53  | 15 | 1   | Medium-quality | 88.84 |
| Sample_C13A_k141_27657             | 211250 | 185 | 1  | 116 | Medium-quality | 88.82 |
| Sample_C10A_k141_279851            | 73111  | 78  | 24 | 2   | Medium-quality | 88.8  |

|                                    |        |     |    |     |                |       |
|------------------------------------|--------|-----|----|-----|----------------|-------|
| Sample_C5A_k141_175383             | 152212 | 133 | 1  | 81  | Medium-quality | 88.75 |
| Sample_T2C_k141_48723              | 149755 | 181 | 2  | 110 | Medium-quality | 88.71 |
| Sample_T4B_k141_154950             | 216506 | 195 | 2  | 117 | Medium-quality | 88.71 |
| Sample_C11A_k141_65217             | 87691  | 85  | 1  | 57  | Medium-quality | 88.67 |
| Sample_C3A_k141_69993              | 51092  | 69  | 19 | 2   | Medium-quality | 88.67 |
| Sample_T10A_k141_9385              | 30609  | 40  | 24 | 1   | Medium-quality | 88.63 |
| Sample_T6C_k141_113038             | 219711 | 175 | 1  | 120 | Medium-quality | 88.54 |
| Sample_C11B_k141_104540            | 55681  | 59  | 6  | 0   | Medium-quality | 88.54 |
| Sample_C9C_k141_91879              | 42593  | 60  | 17 | 4   | Medium-quality | 88.51 |
| Sample_T17B_k141_32463             | 51840  | 60  | 1  | 43  | Medium-quality | 88.5  |
| Sample_T11C_k141_158952            | 26863  | 35  | 15 | 0   | Medium-quality | 88.47 |
| Sample_T10A_k141_21939             | 39897  | 63  | 13 | 1   | Medium-quality | 88.45 |
| Sample_C3A_k141_140344             | 34512  | 42  | 21 | 0   | Medium-quality | 88.43 |
| Sample_C4B_k141_51677_fragment_1   | 40456  | 58  | 28 | 1   | Medium-quality | 88.41 |
| Sample_T7C_k141_52536_fragment_1   | 30193  | 48  | 17 | 1   | Medium-quality | 88.39 |
| Sample_T10A_k141_170822            | 57078  | 49  | 2  | 22  | Medium-quality | 88.37 |
| Sample_T2C_k141_142701             | 165024 | 147 | 1  | 77  | Medium-quality | 88.34 |
| Sample_C4C_k141_72210              | 31835  | 49  | 10 | 3   | Medium-quality | 88.34 |
| Sample_C2B_k141_177672             | 117770 | 127 | 6  | 54  | Medium-quality | 88.3  |
| Sample_C14B_k141_88890             | 31398  | 54  | 18 | 2   | Medium-quality | 88.3  |
| Sample_T13B_k141_58453_fragment_1  | 184331 | 196 | 10 | 26  | Medium-quality | 88.28 |
| Sample_C13C_k141_109684            | 29476  | 48  | 21 | 2   | Medium-quality | 88.22 |
| Sample_T7A_k141_40958              | 16800  | 23  | 2  | 0   | Medium-quality | 88.16 |
| Sample_C7B_k141_131548_fragment_4  | 125660 | 139 | 2  | 16  | Medium-quality | 88.15 |
| Sample_T2A_k141_244513             | 36140  | 51  | 28 | 0   | Medium-quality | 88.15 |
| Sample_T18B_k141_6720              | 31700  | 47  | 12 | 0   | Medium-quality | 88.14 |
| Sample_T16A_k141_54996_fragment_1  | 35464  | 46  | 18 | 0   | Medium-quality | 88.11 |
| Sample_C10A_k141_260119            | 38246  | 39  | 8  | 0   | Medium-quality | 88.06 |
| Sample_C2C_k141_6755_fragment_7    | 33084  | 57  | 16 | 1   | Medium-quality | 88.03 |
| Sample_T10A_k141_133475_fragment_1 | 51916  | 70  | 11 | 5   | Medium-quality | 88    |
| Sample_C4C_k141_215628             | 199278 | 163 | 2  | 96  | Medium-quality | 87.99 |
| Sample_C12C_k141_54102_fragment_4  | 43865  | 73  | 16 | 5   | Medium-quality | 87.89 |
| Sample_T7C_k141_88925              | 39135  | 71  | 17 | 1   | Medium-quality | 87.78 |
| Sample_C11C_k141_23818             | 144331 | 122 | 1  | 82  | Medium-quality | 87.77 |
| Sample_T13B_k141_64817             | 53234  | 86  | 33 | 0   | Medium-quality | 87.77 |
| Sample_T11C_k141_142696            | 38341  | 57  | 23 | 2   | Medium-quality | 87.74 |
| Sample_C11C_k141_76656_fragment_1  | 25291  | 29  | 9  | 0   | Medium-quality | 87.67 |
| Sample_T17B_k141_32649             | 262226 | 213 | 2  | 139 | Medium-quality | 87.59 |
| Sample_C1B_k141_113478_fragment_1  | 40635  | 54  | 15 | 3   | Medium-quality | 87.56 |

|                                    |        |     |    |     |                |       |
|------------------------------------|--------|-----|----|-----|----------------|-------|
| Sample_C6A_k141_172073_fragment_1  | 35448  | 43  | 10 | 5   | Medium-quality | 87.55 |
| Sample_T7A_k141_106905_fragment_1  | 75106  | 108 | 22 | 17  | Medium-quality | 87.55 |
| Sample_T7B_k141_115494             | 40099  | 55  | 32 | 0   | Medium-quality | 87.52 |
| Sample_C11A_k141_134572            | 52359  | 54  | 0  | 24  | Medium-quality | 87.45 |
| Sample_C10A_k141_281652            | 35612  | 51  | 22 | 2   | Medium-quality | 87.43 |
| Sample_C13C_k141_62912_fragment_1  | 35562  | 40  | 28 | 0   | Medium-quality | 87.38 |
| Sample_C1A_k141_231449             | 240158 | 195 | 2  | 120 | Medium-quality | 87.37 |
| Sample_T5A_k141_35926_fragment_2   | 43900  | 48  | 8  | 4   | Medium-quality | 87.36 |
| Sample_C9A_k141_115974_fragment_2  | 37242  | 53  | 20 | 1   | Medium-quality | 87.33 |
| Sample_C13A_k141_107768            | 217408 | 193 | 1  | 138 | Medium-quality | 87.32 |
| Sample_T2A_k141_263098             | 167512 | 157 | 3  | 83  | Medium-quality | 87.31 |
| Sample_C3B_k141_170987             | 5957   | 8   | 3  | 0   | Medium-quality | 87.26 |
| Sample_T3B_k141_40116              | 33858  | 45  | 15 | 0   | Medium-quality | 87.22 |
| Sample_T15C_k141_119522_fragment_1 | 38636  | 53  | 11 | 6   | Medium-quality | 87.17 |
| Sample_C4C_k141_183560_fragment_2  | 30247  | 49  | 14 | 1   | Medium-quality | 87.14 |
| Sample_C6C_k141_158526_fragment_1  | 34312  | 44  | 15 | 3   | Medium-quality | 87.12 |
| Sample_T4B_k141_331659_fragment_2  | 37053  | 46  | 24 | 0   | Medium-quality | 87.12 |
| Sample_C6C_k141_118940             | 32904  | 45  | 15 | 1   | Medium-quality | 87.11 |
| Sample_T10A_k141_29408_fragment_1  | 10404  | 11  | 2  | 0   | Medium-quality | 87.11 |
| Sample_T11A_k141_4046_fragment_1   | 42309  | 69  | 30 | 4   | Medium-quality | 86.98 |
| Sample_T16C_k141_94822             | 142935 | 123 | 1  | 79  | Medium-quality | 86.92 |
| Sample_T18C_k141_133753            | 43785  | 53  | 9  | 1   | Medium-quality | 86.89 |
| Sample_T5C_k141_156283             | 132286 | 151 | 2  | 80  | Medium-quality | 86.86 |
| Sample_C3A_k141_35322              | 36761  | 45  | 6  | 1   | Medium-quality | 86.84 |
| Sample_T15C_k141_127502_fragment_1 | 30192  | 47  | 21 | 1   | Medium-quality | 86.82 |
| Sample_C12B_k141_84086             | 47000  | 73  | 21 | 0   | Medium-quality | 86.75 |
| Sample_T4B_k141_71632              | 179336 | 168 | 3  | 98  | Medium-quality | 86.73 |
| Sample_C4C_k141_262980_fragment_1  | 33461  | 60  | 15 | 1   | Medium-quality | 86.72 |
| Sample_T4B_k141_323424             | 92462  | 111 | 1  | 58  | Medium-quality | 86.7  |
| Sample_C12C_k141_121426_fragment_2 | 41762  | 53  | 22 | 5   | Medium-quality | 86.7  |
| Sample_T15B_k141_109043            | 43685  | 52  | 0  | 12  | Medium-quality | 86.68 |
| Sample_C10A_k141_27147             | 67360  | 70  | 2  | 27  | Medium-quality | 86.66 |
| Sample_C3B_k141_89226              | 32903  | 50  | 25 | 0   | Medium-quality | 86.63 |
| Sample_T13C_k141_4530              | 41009  | 54  | 20 | 4   | Medium-quality | 86.61 |
| Sample_C6B_k141_214583_fragment_1  | 40150  | 56  | 12 | 7   | Medium-quality | 86.6  |
| Sample_T4B_k141_325160             | 35839  | 57  | 17 | 0   | Medium-quality | 86.57 |
| Sample_C14A_k141_71534             | 32764  | 50  | 16 | 0   | Medium-quality | 86.53 |
| Sample_C5B_k141_14543_fragment_1   | 40097  | 63  | 42 | 0   | Medium-quality | 86.5  |
| Sample_C9A_k141_63234              | 40896  | 62  | 12 | 1   | Medium-quality | 86.47 |

|                                    |        |     |    |     |                |       |
|------------------------------------|--------|-----|----|-----|----------------|-------|
| Sample_C5A_k141_34281_fragment_1   | 25274  | 39  | 14 | 1   | Medium-quality | 86.45 |
| Sample_T10A_k141_166560            | 48168  | 56  | 11 | 7   | Medium-quality | 86.39 |
| Sample_C14C_k141_125295            | 30181  | 52  | 19 | 2   | Medium-quality | 86.38 |
| Sample_C12A_k141_131713_fragment_1 | 40051  | 51  | 16 | 2   | Medium-quality | 86.34 |
| Sample_T5C_k141_10805_fragment_1   | 29611  | 40  | 15 | 0   | Medium-quality | 86.33 |
| Sample_C3A_k141_11919              | 38870  | 49  | 19 | 0   | Medium-quality | 86.28 |
| Sample_C4C_k141_81131              | 34642  | 47  | 23 | 0   | Medium-quality | 86.27 |
| Sample_C10A_k141_73594_fragment_1  | 36586  | 50  | 18 | 2   | Medium-quality | 86.25 |
| Sample_C4B_k141_250754             | 37328  | 60  | 16 | 1   | Medium-quality | 86.23 |
| Sample_C7C_k141_25769              | 35176  | 52  | 14 | 0   | Medium-quality | 86.21 |
| Sample_C8A_k141_37849              | 31768  | 43  | 21 | 0   | Medium-quality | 86.2  |
| Sample_C11B_k141_231523            | 69384  | 116 | 19 | 2   | Medium-quality | 86.19 |
| Sample_T15B_k141_14855             | 55162  | 58  | 1  | 24  | Medium-quality | 86.14 |
| Sample_C2B_k141_218921             | 140285 | 93  | 2  | 51  | Medium-quality | 86.13 |
| Sample_C4C_k141_114970             | 45120  | 56  | 20 | 2   | Medium-quality | 86.1  |
| Sample_T11A_k141_49161_fragment_1  | 39407  | 54  | 16 | 7   | Medium-quality | 86.09 |
| Sample_T4A_k141_106576             | 5565   | 10  | 0  | 0   | Medium-quality | 86.08 |
| Sample_C11C_k141_87481             | 38164  | 43  | 22 | 3   | Medium-quality | 86.05 |
| Sample_T10B_k141_49077             | 110701 | 125 | 5  | 16  | Medium-quality | 86.05 |
| Sample_C13A_k141_96335_fragment_1  | 28309  | 31  | 9  | 2   | Medium-quality | 85.99 |
| Sample_T6A_k141_243508             | 57438  | 51  | 1  | 23  | Medium-quality | 85.93 |
| Sample_C5A_k141_160793             | 348538 | 366 | 3  | 226 | Medium-quality | 85.91 |
| Sample_T17A_k141_19751             | 44978  | 52  | 12 | 8   | Medium-quality | 85.89 |
| Sample_C12A_k141_44696             | 204161 | 194 | 1  | 155 | Medium-quality | 85.84 |
| Sample_T3A_k141_60888              | 200268 | 168 | 1  | 112 | Medium-quality | 85.79 |
| Sample_C9A_k141_1646_fragment_1    | 39654  | 50  | 26 | 3   | Medium-quality | 85.76 |
| Sample_T6C_k141_160069_fragment_2  | 51996  | 69  | 10 | 2   | Medium-quality | 85.75 |
| Sample_C11C_k141_117699            | 129447 | 164 | 22 | 2   | Medium-quality | 85.66 |
| Sample_C3A_k141_140205             | 196758 | 144 | 1  | 111 | Medium-quality | 85.63 |
| Sample_C12A_k141_208917_fragment_2 | 49575  | 65  | 29 | 5   | Medium-quality | 85.62 |
| Sample_T3B_k141_34756              | 30116  | 39  | 13 | 0   | Medium-quality | 85.6  |
| Sample_T18B_k141_28937_fragment_1  | 47646  | 56  | 11 | 1   | Medium-quality | 85.58 |
| Sample_T3B_k141_41799              | 39755  | 42  | 1  | 9   | Medium-quality | 85.51 |
| Sample_C4B_k141_187335             | 55230  | 88  | 28 | 0   | Medium-quality | 85.5  |
| Sample_C3C_k141_115073_fragment_1  | 28774  | 45  | 17 | 0   | Medium-quality | 85.48 |
| Sample_C10A_k141_59908             | 205564 | 207 | 3  | 123 | Medium-quality | 85.46 |
| Sample_C2B_k141_163508_fragment_2  | 38233  | 62  | 24 | 2   | Medium-quality | 85.46 |
| Sample_T8B_k141_11266              | 48490  | 69  | 26 | 8   | Medium-quality | 85.35 |
| Sample_T10A_k141_169746            | 30265  | 33  | 12 | 0   | Medium-quality | 85.23 |

|                                    |        |     |    |    |                |       |
|------------------------------------|--------|-----|----|----|----------------|-------|
| Sample_T14B_k141_186529            | 134610 | 147 | 3  | 49 | Medium-quality | 85.14 |
| Sample_T16A_k141_7518_fragment_1   | 49740  | 65  | 30 | 3  | Medium-quality | 85.06 |
| Sample_C10B_k141_59051             | 67988  | 83  | 2  | 8  | Medium-quality | 85.01 |
| Sample_C10B_k141_46522             | 16023  | 22  | 7  | 0  | Medium-quality | 84.97 |
| Sample_T16C_k141_124125            | 130728 | 145 | 14 | 1  | Medium-quality | 84.96 |
| Sample_C14A_k141_90804_fragment_1  | 42803  | 54  | 7  | 3  | Medium-quality | 84.95 |
| Sample_C10A_k141_60977_fragment_1  | 33304  | 61  | 21 | 1  | Medium-quality | 84.94 |
| Sample_T8C_k141_22209              | 34451  | 45  | 14 | 0  | Medium-quality | 84.94 |
| Sample_T2A_k141_18354              | 29450  | 19  | 0  | 8  | Medium-quality | 84.93 |
| Sample_C6C_k141_65181              | 32029  | 50  | 13 | 1  | Medium-quality | 84.77 |
| Sample_C10C_k141_107064            | 31186  | 49  | 28 | 2  | Medium-quality | 84.76 |
| Sample_T12C_k141_25550             | 61386  | 77  | 11 | 4  | Medium-quality | 84.73 |
| Sample_C3C_k141_224145             | 50194  | 75  | 14 | 3  | Medium-quality | 84.73 |
| Sample_T12A_k141_73467             | 47499  | 58  | 9  | 3  | Medium-quality | 84.69 |
| Sample_T3B_k141_99384              | 70050  | 86  | 17 | 8  | Medium-quality | 84.53 |
| Sample_C1B_k141_6969               | 5251   | 10  | 3  | 0  | Medium-quality | 84.52 |
| Sample_C7C_k141_43449_fragment_2   | 47359  | 67  | 29 | 2  | Medium-quality | 84.52 |
| Sample_C11A_k141_55792_fragment_1  | 48663  | 84  | 17 | 0  | Medium-quality | 84.48 |
| Sample_C11B_k141_128404_fragment_1 | 49426  | 67  | 18 | 9  | Medium-quality | 84.48 |
| Sample_T8C_k141_53457_fragment_2   | 47508  | 68  | 11 | 3  | Medium-quality | 84.46 |
| Sample_T3C_k141_53772_fragment_2   | 33069  | 48  | 15 | 0  | Medium-quality | 84.33 |
| Sample_T11A_k141_59250_fragment_1  | 32495  | 59  | 15 | 0  | Medium-quality | 84.31 |
| Sample_C11C_k141_101773            | 37592  | 63  | 23 | 0  | Medium-quality | 84.23 |
| Sample_T15B_k141_111690_fragment_1 | 31848  | 51  | 18 | 0  | Medium-quality | 84.22 |
| Sample_T15B_k141_106747            | 16114  | 25  | 8  | 0  | Medium-quality | 84.16 |
| Sample_T7B_k141_63587_fragment_1   | 75024  | 131 | 11 | 4  | Medium-quality | 84.14 |
| Sample_T8B_k141_148465_fragment_3  | 33962  | 46  | 14 | 0  | Medium-quality | 84.14 |
| Sample_T12A_k141_156836_fragment_1 | 25469  | 34  | 12 | 1  | Medium-quality | 84.07 |
| Sample_C6C_k141_52659              | 15586  | 16  | 3  | 9  | Medium-quality | 84.03 |
| Sample_T8A_k141_166198             | 15141  | 12  | 3  | 2  | Medium-quality | 83.99 |
| Sample_C13B_k141_38365_fragment_1  | 51567  | 59  | 4  | 4  | Medium-quality | 83.99 |
| Sample_T11C_k141_147097_fragment_1 | 50981  | 72  | 25 | 0  | Medium-quality | 83.98 |
| Sample_T18A_k141_52670             | 42314  | 58  | 26 | 4  | Medium-quality | 83.93 |
| Sample_T11A_k141_7810_fragment_1   | 37603  | 57  | 14 | 1  | Medium-quality | 83.92 |
| Sample_C4A_k141_171215_fragment_2  | 41905  | 60  | 27 | 2  | Medium-quality | 83.91 |
| Sample_C6C_k141_224960             | 55855  | 61  | 26 | 3  | Medium-quality | 83.83 |
| Sample_T5C_k141_27285              | 31625  | 43  | 15 | 0  | Medium-quality | 83.77 |
| Sample_C10A_k141_337509            | 73540  | 79  | 2  | 42 | Medium-quality | 83.7  |
| Sample_C8B_k141_169530             | 46649  | 58  | 9  | 1  | Medium-quality | 83.69 |

|                                    |        |     |    |    |                |       |
|------------------------------------|--------|-----|----|----|----------------|-------|
| Sample_T4C_k141_27107              | 31024  | 46  | 21 | 0  | Medium-quality | 83.67 |
| Sample_C9C_k141_98793              | 27148  | 46  | 12 | 0  | Medium-quality | 83.64 |
| Sample_T4B_k141_240169_fragment_1  | 34134  | 51  | 24 | 0  | Medium-quality | 83.63 |
| Sample_T11C_k141_87733             | 78811  | 74  | 1  | 62 | Medium-quality | 83.56 |
| Sample_T13B_k141_85630             | 33043  | 50  | 16 | 0  | Medium-quality | 83.56 |
| Sample_T10B_k141_21815_fragment_3  | 38068  | 49  | 20 | 2  | Medium-quality | 83.54 |
| Sample_T4B_k141_128624             | 92490  | 73  | 1  | 41 | Medium-quality | 83.52 |
| Sample_T2C_k141_158847             | 34933  | 39  | 6  | 0  | Medium-quality | 83.48 |
| Sample_T14B_k141_12180_fragment_2  | 37367  | 60  | 13 | 2  | Medium-quality | 83.41 |
| Sample_T2B_k141_107999             | 147610 | 141 | 1  | 90 | Medium-quality | 83.4  |
| Sample_T13B_k141_177852            | 66275  | 76  | 3  | 9  | Medium-quality | 83.38 |
| Sample_C2B_k141_178224             | 73869  | 82  | 2  | 24 | Medium-quality | 83.37 |
| Sample_C8A_k141_87022              | 39472  | 39  | 6  | 2  | Medium-quality | 83.33 |
| Sample_T13C_k141_12206             | 97002  | 100 | 3  | 16 | Medium-quality | 83.3  |
| Sample_T2C_k141_60541              | 37292  | 69  | 12 | 1  | Medium-quality | 83.3  |
| Sample_T6B_k141_32849              | 145074 | 146 | 38 | 5  | Medium-quality | 83.26 |
| Sample_C14C_k141_169292            | 34612  | 44  | 20 | 4  | Medium-quality | 83.21 |
| Sample_T14B_k141_9221              | 48442  | 43  | 1  | 22 | Medium-quality | 83.14 |
| Sample_C11C_k141_11664             | 40147  | 46  | 12 | 1  | Medium-quality | 83.12 |
| Sample_C10C_k141_73727             | 26920  | 44  | 14 | 0  | Medium-quality | 83.1  |
| Sample_C10C_k141_96331_fragment_1  | 37235  | 60  | 14 | 2  | Medium-quality | 83.06 |
| Sample_C5A_k141_249565             | 37765  | 51  | 22 | 5  | Medium-quality | 83.06 |
| Sample_C13A_k141_50305             | 41451  | 39  | 1  | 34 | Medium-quality | 83.03 |
| Sample_T6C_k141_63706_fragment_1   | 29452  | 44  | 19 | 0  | Medium-quality | 82.96 |
| Sample_T4B_k141_155361             | 134100 | 150 | 1  | 68 | Medium-quality | 82.87 |
| Sample_C2B_k141_154859             | 118185 | 114 | 2  | 70 | Medium-quality | 82.73 |
| Sample_T14A_k141_98089             | 128516 | 117 | 1  | 94 | Medium-quality | 82.71 |
| Sample_C10A_k141_121265            | 33614  | 41  | 19 | 2  | Medium-quality | 82.62 |
| Sample_C10A_k141_57239             | 70115  | 89  | 19 | 14 | Medium-quality | 82.61 |
| Sample_T6C_k141_214111_fragment_1  | 62901  | 78  | 9  | 9  | Medium-quality | 82.54 |
| Sample_T5C_k141_61485_fragment_1   | 37056  | 53  | 14 | 2  | Medium-quality | 82.53 |
| Sample_T7A_k141_132870             | 42232  | 62  | 6  | 1  | Medium-quality | 82.53 |
| Sample_C10A_k141_63337             | 30618  | 41  | 16 | 0  | Medium-quality | 82.47 |
| Sample_C12C_k141_140447_fragment_1 | 48543  | 62  | 33 | 1  | Medium-quality | 82.38 |
| Sample_T7A_k141_195012_fragment_1  | 28866  | 50  | 16 | 0  | Medium-quality | 82.36 |
| Sample_T10A_k141_28106_fragment_1  | 53702  | 79  | 33 | 0  | Medium-quality | 82.35 |
| Sample_T12C_k141_126141_fragment_1 | 40236  | 33  | 2  | 8  | Medium-quality | 82.28 |
| Sample_T12A_k141_69089             | 180482 | 178 | 21 | 1  | Medium-quality | 82.27 |
| Sample_C12A_k141_205787            | 194768 | 168 | 2  | 13 | Medium-quality | 82.25 |

|                                    |        |     |    |    |                |       |
|------------------------------------|--------|-----|----|----|----------------|-------|
| Sample_T17A_k141_18309_fragment_1  | 86688  | 97  | 24 | 13 | Medium-quality | 82.21 |
| Sample_C9A_k141_112775             | 38351  | 53  | 22 | 2  | Medium-quality | 82.15 |
| Sample_T17B_k141_5940              | 42657  | 59  | 28 | 1  | Medium-quality | 82.1  |
| Sample_C12C_k141_134397            | 39730  | 45  | 8  | 2  | Medium-quality | 82.08 |
| Sample_C1B_k141_14145              | 158911 | 136 | 1  | 91 | Medium-quality | 82.04 |
| Sample_C6A_k141_126198             | 45903  | 56  | 10 | 9  | Medium-quality | 81.95 |
| Sample_C5C_k141_48449              | 38344  | 69  | 42 | 0  | Medium-quality | 81.94 |
| Sample_C13A_k141_11688             | 15826  | 19  | 9  | 0  | Medium-quality | 81.9  |
| Sample_T17B_k141_8647              | 33619  | 38  | 11 | 2  | Medium-quality | 81.86 |
| Sample_C14C_k141_114371            | 27687  | 39  | 16 | 0  | Medium-quality | 81.79 |
| Sample_C1B_k141_5886               | 43703  | 47  | 19 | 4  | Medium-quality | 81.73 |
| Sample_C3A_k141_119143_fragment_1  | 24832  | 31  | 15 | 4  | Medium-quality | 81.68 |
| Sample_T12C_k141_68933_fragment_1  | 30163  | 42  | 22 | 1  | Medium-quality | 81.65 |
| Sample_T6B_k141_184640             | 31976  | 52  | 12 | 1  | Medium-quality | 81.56 |
| Sample_C4C_k141_194433_fragment_1  | 41718  | 60  | 14 | 4  | Medium-quality | 81.53 |
| Sample_T2C_k141_151682             | 35101  | 57  | 18 | 0  | Medium-quality | 81.5  |
| Sample_T11B_k141_104741            | 36803  | 34  | 2  | 14 | Medium-quality | 81.48 |
| Sample_C10A_k141_86233_fragment_1  | 36751  | 47  | 26 | 0  | Medium-quality | 81.47 |
| Sample_C13B_k141_56957             | 34071  | 53  | 22 | 0  | Medium-quality | 81.46 |
| Sample_C5A_k141_161307_fragment_1  | 35217  | 48  | 17 | 2  | Medium-quality | 81.46 |
| Sample_T5C_k141_181665             | 36971  | 56  | 14 | 0  | Medium-quality | 81.45 |
| Sample_T12A_k141_75569_fragment_1  | 39833  | 56  | 19 | 1  | Medium-quality | 81.44 |
| Sample_T10B_k141_159511            | 29136  | 41  | 13 | 0  | Medium-quality | 81.4  |
| Sample_T1A_k141_28748              | 50622  | 71  | 19 | 5  | Medium-quality | 81.4  |
| Sample_C2A_k141_119617             | 142410 | 190 | 23 | 3  | Medium-quality | 81.33 |
| Sample_C4C_k141_229447             | 29649  | 45  | 19 | 0  | Medium-quality | 81.31 |
| Sample_T6B_k141_115767_fragment_2  | 32840  | 27  | 8  | 0  | Medium-quality | 81.26 |
| Sample_C2B_k141_228085             | 136858 | 145 | 1  | 91 | Medium-quality | 81.25 |
| Sample_C10A_k141_324409            | 40848  | 41  | 12 | 6  | Medium-quality | 81.19 |
| Sample_T11A_k141_109837            | 29783  | 35  | 2  | 4  | Medium-quality | 81.18 |
| Sample_C12A_k141_65091_fragment_1  | 42960  | 63  | 11 | 8  | Medium-quality | 81.15 |
| Sample_T13C_k141_89034_fragment_2  | 58709  | 72  | 16 | 5  | Medium-quality | 81.13 |
| Sample_T12B_k141_153615_fragment_1 | 40258  | 54  | 15 | 0  | Medium-quality | 81.06 |
| Sample_C6B_k141_190744_fragment_1  | 47929  | 59  | 14 | 7  | Medium-quality | 81.03 |
| Sample_T13B_k141_69417             | 37627  | 31  | 0  | 23 | Medium-quality | 81.01 |
| Sample_T12B_k141_83438             | 34716  | 61  | 16 | 0  | Medium-quality | 80.98 |
| Sample_C12A_k141_32565             | 26163  | 31  | 14 | 1  | Medium-quality | 80.97 |
| Sample_C2B_k141_292505_fragment_1  | 39769  | 58  | 14 | 4  | Medium-quality | 80.97 |
| Sample_C10A_k141_69985_fragment_1  | 34698  | 33  | 3  | 0  | Medium-quality | 80.89 |

|                                    |        |     |    |     |                |       |
|------------------------------------|--------|-----|----|-----|----------------|-------|
| Sample_T5C_k141_101017_fragment_2  | 39533  | 51  | 17 | 0   | Medium-quality | 80.83 |
| Sample_T17C_k141_1816              | 50332  | 74  | 19 | 6   | Medium-quality | 80.82 |
| Sample_T4B_k141_174096             | 46599  | 83  | 10 | 1   | Medium-quality | 80.79 |
| Sample_T8A_k141_215722             | 36472  | 41  | 6  | 4   | Medium-quality | 80.77 |
| Sample_T4C_k141_39098_fragment_1   | 13731  | 17  | 7  | 0   | Medium-quality | 80.65 |
| Sample_C4B_k141_14334              | 125259 | 126 | 1  | 108 | Medium-quality | 80.61 |
| Sample_T5B_k141_1377               | 44866  | 66  | 11 | 1   | Medium-quality | 80.55 |
| Sample_T2A_k141_35171              | 13122  | 16  | 0  | 0   | Medium-quality | 80.53 |
| Sample_T15C_k141_16856_fragment_1  | 31735  | 53  | 18 | 2   | Medium-quality | 80.53 |
| Sample_T14C_k141_25853             | 40078  | 36  | 8  | 1   | Medium-quality | 80.47 |
| Sample_C8C_k141_55607              | 54936  | 50  | 0  | 11  | Medium-quality | 80.46 |
| Sample_C11A_k141_18491_fragment_1  | 30693  | 39  | 17 | 0   | Medium-quality | 80.46 |
| Sample_C2A_k141_210146             | 63707  | 89  | 9  | 1   | Medium-quality | 80.41 |
| Sample_T4C_k141_20057_fragment_1   | 49359  | 66  | 11 | 0   | Medium-quality | 80.37 |
| Sample_T8A_k141_138708             | 119538 | 123 | 1  | 30  | Medium-quality | 80.36 |
| Sample_T13B_k141_174719            | 31971  | 46  | 3  | 1   | Medium-quality | 80.35 |
| Sample_C1A_k141_366                | 153050 | 144 | 2  | 83  | Medium-quality | 80.3  |
| Sample_T3A_k141_52358              | 29940  | 23  | 1  | 7   | Medium-quality | 80.25 |
| Sample_C10B_k141_128914            | 10834  | 14  | 0  | 1   | Medium-quality | 80.18 |
| Sample_T10C_k141_34738             | 54764  | 44  | 0  | 9   | Medium-quality | 80.01 |
| Sample_C9C_k141_3370               | 204415 | 197 | 2  | 107 | Medium-quality | 80    |
| Sample_T3B_k141_47318              | 12352  | 10  | 1  | 0   | Medium-quality | 79.94 |
| Sample_T6C_k141_6304               | 59050  | 94  | 18 | 5   | Medium-quality | 79.87 |
| Sample_C4B_k141_107345             | 121050 | 131 | 3  | 66  | Medium-quality | 79.79 |
| Sample_C10A_k141_140301            | 36124  | 46  | 7  | 0   | Medium-quality | 79.78 |
| Sample_T15C_k141_120081_fragment_1 | 25455  | 35  | 15 | 1   | Medium-quality | 79.77 |
| Sample_T18A_k141_73832             | 197886 | 172 | 1  | 118 | Medium-quality | 79.75 |
| Sample_T16C_k141_40226_fragment_1  | 33482  | 42  | 18 | 0   | Medium-quality | 79.75 |
| Sample_C11C_k141_573_fragment_1    | 180410 | 220 | 42 | 6   | Medium-quality | 79.74 |
| Sample_T17B_k141_4187_fragment_1   | 57273  | 88  | 31 | 1   | Medium-quality | 79.71 |
| Sample_C7A_k141_170291             | 31831  | 31  | 1  | 8   | Medium-quality | 79.68 |
| Sample_T4B_k141_373737             | 33250  | 46  | 18 | 0   | Medium-quality | 79.66 |
| Sample_T13C_k141_24893_fragment_1  | 32426  | 44  | 21 | 1   | Medium-quality | 79.57 |
| Sample_C11A_k141_120496_fragment_2 | 37578  | 51  | 20 | 2   | Medium-quality | 79.56 |
| Sample_T4B_k141_194013             | 435157 | 407 | 1  | 248 | Medium-quality | 79.47 |
| Sample_T4B_k141_183365             | 33172  | 40  | 1  | 20  | Medium-quality | 79.44 |
| Sample_T4B_k141_112863             | 125036 | 137 | 3  | 76  | Medium-quality | 79.42 |
| Sample_T4B_k141_267836             | 17784  | 24  | 7  | 0   | Medium-quality | 79.42 |
| Sample_T2A_k141_18033              | 87949  | 49  | 1  | 23  | Medium-quality | 79.41 |



|                                    |        |     |    |     |                |       |
|------------------------------------|--------|-----|----|-----|----------------|-------|
| Sample_C6B_k141_140822             | 32949  | 46  | 10 | 3   | Medium-quality | 79.39 |
| Sample_T8C_k141_71984_fragment_1   | 44118  | 68  | 17 | 4   | Medium-quality | 79.38 |
| Sample_T11B_k141_160350_fragment_3 | 43160  | 48  | 23 | 2   | Medium-quality | 79.33 |
| Sample_C3A_k141_42337_fragment_1   | 73263  | 96  | 14 | 6   | Medium-quality | 79.31 |
| Sample_T12B_k141_59025             | 62326  | 84  | 26 | 9   | Medium-quality | 79.22 |
| Sample_T4B_k141_16587              | 37857  | 37  | 4  | 3   | Medium-quality | 79.22 |
| Sample_T4C_k141_113518_fragment_1  | 31617  | 49  | 18 | 0   | Medium-quality | 79.22 |
| Sample_C12C_k141_120893            | 56179  | 56  | 2  | 13  | Medium-quality | 79.19 |
| Sample_C4C_k141_243864             | 35860  | 50  | 15 | 2   | Medium-quality | 79.18 |
| Sample_C7A_k141_152339             | 107475 | 116 | 31 | 1   | Medium-quality | 79.15 |
| Sample_C10A_k141_111966_fragment_1 | 31067  | 42  | 22 | 0   | Medium-quality | 79.11 |
| Sample_T13C_k141_5953_fragment_1   | 39751  | 50  | 12 | 3   | Medium-quality | 79.1  |
| Sample_C5B_k141_47456              | 13935  | 19  | 7  | 0   | Medium-quality | 78.98 |
| Sample_T11A_k141_118130_fragment_1 | 40123  | 41  | 4  | 2   | Medium-quality | 78.97 |
| Sample_T8B_k141_140787             | 36745  | 49  | 16 | 0   | Medium-quality | 78.88 |
| Sample_C4B_k141_74879              | 27188  | 39  | 16 | 2   | Medium-quality | 78.87 |
| Sample_T12B_k141_120554            | 32964  | 24  | 1  | 6   | Medium-quality | 78.82 |
| Sample_T2C_k141_275171             | 29845  | 43  | 5  | 0   | Medium-quality | 78.73 |
| Sample_T15A_k141_49222             | 61939  | 57  | 0  | 18  | Medium-quality | 78.69 |
| Sample_T11C_k141_83600             | 117362 | 134 | 1  | 61  | Medium-quality | 78.65 |
| Sample_C6B_k141_94597              | 35944  | 54  | 13 | 1   | Medium-quality | 78.61 |
| Sample_T14A_k141_185058_fragment_1 | 30869  | 38  | 25 | 1   | Medium-quality | 78.59 |
| Sample_T12B_k141_27561             | 35318  | 40  | 3  | 1   | Medium-quality | 78.56 |
| Sample_C5A_k141_71891_fragment_1   | 35459  | 49  | 20 | 3   | Medium-quality | 78.54 |
| Sample_C5C_k141_1863               | 22601  | 33  | 10 | 1   | Medium-quality | 78.35 |
| Sample_T10C_k141_46709_fragment_1  | 45147  | 75  | 17 | 0   | Medium-quality | 78.3  |
| Sample_C1C_k141_102365             | 28374  | 31  | 14 | 1   | Medium-quality | 78.26 |
| Sample_C2A_k141_252630             | 112495 | 133 | 41 | 6   | Medium-quality | 78.24 |
| Sample_T18C_k141_89176             | 158511 | 142 | 3  | 65  | Medium-quality | 78.23 |
| Sample_T6C_k141_89971_fragment_2   | 36307  | 47  | 14 | 8   | Medium-quality | 78.18 |
| Sample_C4C_k141_195787             | 427943 | 388 | 1  | 240 | Medium-quality | 78.16 |
| Sample_C2A_k141_118054             | 47234  | 66  | 15 | 3   | Medium-quality | 78.13 |
| Sample_T12A_k141_194457_fragment_3 | 12651  | 15  | 3  | 4   | Medium-quality | 78.12 |
| Sample_T17A_k141_20651             | 38906  | 53  | 24 | 0   | Medium-quality | 78.12 |
| Sample_T16A_k141_101578_fragment_1 | 36861  | 52  | 19 | 3   | Medium-quality | 78.11 |
| Sample_C4A_k141_262734             | 53935  | 88  | 28 | 0   | Medium-quality | 78.06 |
| Sample_T6A_k141_84179              | 35838  | 48  | 4  | 0   | Medium-quality | 78.04 |
| Sample_T17A_k141_28883_fragment_1  | 59509  | 84  | 14 | 5   | Medium-quality | 78    |
| Sample_T3C_k141_19558              | 135383 | 120 | 1  | 33  | Medium-quality | 77.97 |

|                                   |        |     |    |    |                |       |
|-----------------------------------|--------|-----|----|----|----------------|-------|
| Sample_T2B_k141_122137            | 115919 | 95  | 1  | 38 | Medium-quality | 77.92 |
| Sample_T10C_k141_81274            | 50364  | 67  | 12 | 2  | Medium-quality | 77.9  |
| Sample_T6C_k141_2994_fragment_1   | 49166  | 58  | 25 | 2  | Medium-quality | 77.89 |
| Sample_C3C_k141_145838            | 42760  | 43  | 0  | 18 | Medium-quality | 77.88 |
| Sample_T4B_k141_57557_fragment_2  | 37631  | 54  | 16 | 1  | Medium-quality | 77.86 |
| Sample_C9A_k141_46447_fragment_1  | 52466  | 57  | 27 | 5  | Medium-quality | 77.83 |
| Sample_T5C_k141_71139_fragment_1  | 45340  | 61  | 16 | 7  | Medium-quality | 77.75 |
| Sample_C10A_k141_93891_fragment_1 | 48544  | 41  | 5  | 1  | Medium-quality | 77.72 |
| Sample_T7B_k141_86518_fragment_1  | 30900  | 45  | 8  | 0  | Medium-quality | 77.66 |
| Sample_T5B_k141_57714             | 41081  | 48  | 11 | 4  | Medium-quality | 77.52 |
| Sample_T13B_k141_1190             | 69790  | 74  | 3  | 7  | Medium-quality | 77.41 |
| Sample_T11A_k141_131845           | 127273 | 88  | 1  | 66 | Medium-quality | 77.4  |
| Sample_T12B_k141_151843           | 127264 | 97  | 1  | 79 | Medium-quality | 77.39 |
| Sample_T1C_k141_59558             | 71177  | 117 | 15 | 9  | Medium-quality | 77.38 |
| Sample_T17C_k141_13381_fragment_1 | 35438  | 43  | 13 | 0  | Medium-quality | 77.35 |
| Sample_T2A_k141_100529            | 111174 | 135 | 2  | 63 | Medium-quality | 77.34 |
| Sample_T5C_k141_94002             | 51695  | 54  | 1  | 26 | Medium-quality | 77.33 |
| Sample_T4B_k141_301066_fragment_1 | 35232  | 46  | 18 | 1  | Medium-quality | 77.32 |
| Sample_T18C_k141_128427           | 114340 | 163 | 8  | 10 | Medium-quality | 77.31 |
| Sample_C13C_k141_69201            | 75811  | 133 | 10 | 1  | Medium-quality | 77.19 |
| Sample_T11A_k141_80553            | 42648  | 61  | 15 | 5  | Medium-quality | 77.11 |
| Sample_T17B_k141_6674             | 38473  | 24  | 1  | 13 | Medium-quality | 77.06 |
| Sample_C12B_k141_18312            | 57022  | 58  | 17 | 12 | Medium-quality | 77.06 |
| Sample_C9B_k141_15744             | 197409 | 132 | 2  | 87 | Medium-quality | 77.02 |
| Sample_C12A_k141_65755            | 46092  | 50  | 0  | 22 | Medium-quality | 76.99 |
| Sample_T3C_k141_99723             | 11278  | 20  | 3  | 0  | Medium-quality | 76.98 |
| Sample_C3A_k141_31991_fragment_1  | 35185  | 49  | 33 | 3  | Medium-quality | 76.95 |
| Sample_T13B_k141_4613             | 44256  | 57  | 37 | 4  | Medium-quality | 76.93 |
| Sample_T13A_k141_57369            | 29670  | 41  | 15 | 1  | Medium-quality | 76.92 |
| Sample_T13A_k141_98666_fragment_1 | 27999  | 40  | 24 | 1  | Medium-quality | 76.92 |
| Sample_C1C_k141_55278_fragment_1  | 35716  | 47  | 23 | 1  | Medium-quality | 76.91 |
| Sample_T5B_k141_27809_fragment_1  | 46911  | 56  | 13 | 1  | Medium-quality | 76.9  |
| Sample_T14B_k141_92194_fragment_2 | 119036 | 135 | 6  | 10 | Medium-quality | 76.83 |
| Sample_T7A_k141_81809             | 11179  | 17  | 1  | 0  | Medium-quality | 76.81 |
| Sample_T1C_k141_34747             | 58789  | 96  | 11 | 2  | Medium-quality | 76.8  |
| Sample_C3C_k141_39928             | 39862  | 55  | 17 | 1  | Medium-quality | 76.78 |
| Sample_T4C_k141_27983             | 31714  | 44  | 13 | 2  | Medium-quality | 76.75 |
| Sample_C12A_k141_34700_fragment_1 | 29385  | 45  | 18 | 3  | Medium-quality | 76.71 |
| Sample_T2A_k141_266073            | 80246  | 86  | 3  | 48 | Medium-quality | 76.68 |

|                                    |        |     |    |     |                |       |
|------------------------------------|--------|-----|----|-----|----------------|-------|
| Sample_T7C_k141_69560              | 113990 | 97  | 1  | 67  | Medium-quality | 76.63 |
| Sample_T7B_k141_99177              | 27661  | 45  | 7  | 0   | Medium-quality | 76.62 |
| Sample_T8B_k141_4821               | 53273  | 39  | 0  | 12  | Medium-quality | 76.58 |
| Sample_T2C_k141_259081_fragment_1  | 29058  | 32  | 23 | 0   | Medium-quality | 76.55 |
| Sample_T15B_k141_110519            | 52465  | 57  | 1  | 11  | Medium-quality | 76.45 |
| Sample_T12A_k141_177437            | 67308  | 93  | 8  | 3   | Medium-quality | 76.43 |
| Sample_C10B_k141_24982             | 16832  | 21  | 7  | 0   | Medium-quality | 76.35 |
| Sample_T10A_k141_103577            | 22303  | 30  | 13 | 1   | Medium-quality | 76.28 |
| Sample_T14A_k141_237174            | 27944  | 46  | 10 | 1   | Medium-quality | 76.25 |
| Sample_T4B_k141_217730_fragment_1  | 34675  | 51  | 15 | 1   | Medium-quality | 76.24 |
| Sample_T16C_k141_132757_fragment_1 | 52460  | 69  | 28 | 3   | Medium-quality | 76.16 |
| Sample_T6C_k141_157077             | 48678  | 46  | 8  | 4   | Medium-quality | 76.16 |
| Sample_C7A_k141_7390               | 47103  | 72  | 25 | 3   | Medium-quality | 76.07 |
| Sample_C13A_k141_85582             | 120692 | 133 | 2  | 78  | Medium-quality | 76.06 |
| Sample_C13B_k141_29310             | 17665  | 27  | 8  | 0   | Medium-quality | 76.05 |
| Sample_C2C_k141_244821_fragment_1  | 58322  | 72  | 21 | 6   | Medium-quality | 76.05 |
| Sample_C10A_k141_68513_fragment_1  | 35604  | 45  | 8  | 2   | Medium-quality | 76.04 |
| Sample_T13C_k141_98645_fragment_4  | 47322  | 82  | 20 | 1   | Medium-quality | 76.03 |
| Sample_C13B_k141_20500             | 24673  | 35  | 11 | 4   | Medium-quality | 76.02 |
| Sample_C11B_k141_217575            | 32755  | 48  | 14 | 0   | Medium-quality | 75.94 |
| Sample_C3A_k141_20631_fragment_1   | 37427  | 44  | 6  | 4   | Medium-quality | 75.87 |
| Sample_T14B_k141_53791             | 200610 | 174 | 3  | 115 | Medium-quality | 75.83 |
| Sample_T13C_k141_143041_fragment_2 | 30197  | 48  | 19 | 1   | Medium-quality | 75.82 |
| Sample_C6B_k141_211260_fragment_1  | 40110  | 52  | 9  | 2   | Medium-quality | 75.78 |
| Sample_C13A_k141_6576_fragment_1   | 33238  | 43  | 7  | 1   | Medium-quality | 75.75 |
| Sample_T4B_k141_78224              | 21679  | 17  | 1  | 10  | Medium-quality | 75.57 |
| Sample_T11A_k141_148520            | 25419  | 47  | 22 | 0   | Medium-quality | 75.57 |
| Sample_T6C_k141_167684             | 33901  | 48  | 2  | 2   | Medium-quality | 75.52 |
| Sample_C4A_k141_234710_fragment_1  | 87991  | 94  | 27 | 10  | Medium-quality | 75.46 |
| Sample_C13C_k141_30080_fragment_1  | 31219  | 48  | 14 | 0   | Medium-quality | 75.42 |
| Sample_T15A_k141_31552             | 186976 | 139 | 3  | 107 | Medium-quality | 75.32 |
| Sample_T7C_k141_140099             | 43969  | 57  | 9  | 1   | Medium-quality | 75.26 |
| Sample_T2A_k141_27416_fragment_1   | 112662 | 120 | 40 | 6   | Medium-quality | 75.25 |
| Sample_T6B_k141_57709              | 57828  | 62  | 1  | 41  | Medium-quality | 75.23 |
| Sample_C6A_k141_59450_fragment_2   | 54885  | 83  | 14 | 6   | Medium-quality | 75.18 |
| Sample_T12A_k141_178227            | 37475  | 37  | 8  | 1   | Medium-quality | 75.12 |
| Sample_C4B_k141_113003             | 33498  | 53  | 22 | 0   | Medium-quality | 75.07 |
| Sample_T5A_k141_37312_fragment_1   | 30913  | 51  | 18 | 0   | Medium-quality | 75.04 |
| Sample_C3A_k141_66314              | 10162  | 14  | 1  | 0   | Medium-quality | 75.01 |

|                                    |        |     |    |     |                |       |
|------------------------------------|--------|-----|----|-----|----------------|-------|
| Sample_C6B_k141_200782_fragment_1  | 28162  | 43  | 16 | 0   | Medium-quality | 74.89 |
| Sample_T12C_k141_68639             | 32948  | 40  | 1  | 2   | Medium-quality | 74.85 |
| Sample_T8C_k141_71518              | 263034 | 244 | 1  | 188 | Medium-quality | 74.84 |
| Sample_C8B_k141_100786             | 27067  | 36  | 16 | 0   | Medium-quality | 74.84 |
| Sample_T8B_k141_266223             | 21445  | 22  | 3  | 1   | Medium-quality | 74.75 |
| Sample_C2A_k141_238760             | 87946  | 104 | 29 | 2   | Medium-quality | 74.73 |
| Sample_T10C_k141_70278_fragment_1  | 33615  | 44  | 15 | 0   | Medium-quality | 74.68 |
| Sample_C1C_k141_128162_fragment_1  | 39856  | 54  | 8  | 0   | Medium-quality | 74.65 |
| Sample_C11A_k141_74514_fragment_1  | 42502  | 58  | 19 | 4   | Medium-quality | 74.61 |
| Sample_T6B_k141_53521_fragment_3   | 46609  | 80  | 30 | 1   | Medium-quality | 74.61 |
| Sample_T11A_k141_58212             | 26918  | 40  | 18 | 1   | Medium-quality | 74.6  |
| Sample_C5A_k141_29955              | 57486  | 54  | 0  | 12  | Medium-quality | 74.57 |
| Sample_C6C_k141_49147              | 26457  | 38  | 7  | 1   | Medium-quality | 74.56 |
| Sample_T4C_k141_14582_fragment_1   | 29278  | 45  | 10 | 0   | Medium-quality | 74.54 |
| Sample_C10A_k141_56652             | 120497 | 111 | 1  | 81  | Medium-quality | 74.46 |
| Sample_T8A_k141_225413             | 28404  | 43  | 2  | 0   | Medium-quality | 74.46 |
| Sample_C3B_k141_219836_fragment_1  | 39336  | 56  | 29 | 4   | Medium-quality | 74.45 |
| Sample_C2C_k141_237008             | 116158 | 150 | 29 | 4   | Medium-quality | 74.41 |
| Sample_C4C_k141_142055             | 27975  | 41  | 15 | 1   | Medium-quality | 74.41 |
| Sample_T4B_k141_180609             | 49723  | 58  | 1  | 25  | Medium-quality | 74.38 |
| Sample_C13C_k141_107247            | 42526  | 57  | 5  | 4   | Medium-quality | 74.24 |
| Sample_C4A_k141_187943_fragment_1  | 33676  | 56  | 27 | 0   | Medium-quality | 74.22 |
| Sample_T15C_k141_87649             | 30028  | 37  | 11 | 0   | Medium-quality | 74.2  |
| Sample_C4A_k141_142275             | 33529  | 39  | 10 | 2   | Medium-quality | 74.13 |
| Sample_C2C_k141_223668             | 27228  | 49  | 11 | 4   | Medium-quality | 74.12 |
| Sample_C5A_k141_21860_fragment_1   | 41775  | 51  | 7  | 1   | Medium-quality | 74.12 |
| Sample_T5A_k141_49139_fragment_3   | 52422  | 65  | 13 | 5   | Medium-quality | 74.11 |
| Sample_T17A_k141_27997_fragment_2  | 25463  | 40  | 16 | 0   | Medium-quality | 74.09 |
| Sample_C11B_k141_157394            | 68616  | 88  | 21 | 4   | Medium-quality | 74.06 |
| Sample_T2B_k141_318772             | 138245 | 139 | 1  | 65  | Medium-quality | 74.01 |
| Sample_C10C_k141_165136            | 46009  | 55  | 21 | 3   | Medium-quality | 73.98 |
| Sample_T7C_k141_62215_fragment_1   | 54990  | 92  | 16 | 4   | Medium-quality | 73.94 |
| Sample_C3A_k141_244074             | 16766  | 21  | 3  | 0   | Medium-quality | 73.91 |
| Sample_T13B_k141_31917             | 159299 | 144 | 2  | 94  | Medium-quality | 73.9  |
| Sample_T4C_k141_45414              | 109900 | 96  | 1  | 57  | Medium-quality | 73.88 |
| Sample_T2A_k141_83039              | 10136  | 11  | 0  | 2   | Medium-quality | 73.84 |
| Sample_T15A_k141_154913            | 35485  | 46  | 12 | 0   | Medium-quality | 73.82 |
| Sample_C11C_k141_137766_fragment_1 | 34619  | 51  | 8  | 0   | Medium-quality | 73.74 |
| Sample_T15C_k141_115204            | 77325  | 102 | 26 | 1   | Medium-quality | 73.7  |

|                                    |        |     |    |     |                |       |
|------------------------------------|--------|-----|----|-----|----------------|-------|
| Sample_T15C_k141_136512            | 61878  | 58  | 1  | 15  | Medium-quality | 73.68 |
| Sample_C5A_k141_32283_fragment_1   | 36789  | 63  | 18 | 1   | Medium-quality | 73.65 |
| Sample_T4B_k141_131030_fragment_1  | 35519  | 61  | 14 | 0   | Medium-quality | 73.58 |
| Sample_T1B_k141_31370              | 25494  | 16  | 0  | 6   | Medium-quality | 73.52 |
| Sample_C13B_k141_60867             | 37328  | 49  | 2  | 3   | Medium-quality | 73.52 |
| Sample_C6A_k141_62987_fragment_1   | 33893  | 49  | 15 | 4   | Medium-quality | 73.51 |
| Sample_T13B_k141_66590             | 117472 | 130 | 2  | 107 | Medium-quality | 73.5  |
| Sample_C11C_k141_172842_fragment_1 | 34478  | 46  | 21 | 0   | Medium-quality | 73.5  |
| Sample_T15A_k141_155425_fragment_1 | 47742  | 41  | 4  | 3   | Medium-quality | 73.47 |
| Sample_T3C_k141_124248             | 31675  | 44  | 24 | 2   | Medium-quality | 73.44 |
| Sample_T8B_k141_277897             | 109132 | 88  | 1  | 33  | Medium-quality | 73.36 |
| Sample_T8C_k141_6692_fragment_1    | 34099  | 43  | 19 | 0   | Medium-quality | 73.25 |
| Sample_T5A_k141_17900              | 25388  | 33  | 16 | 0   | Medium-quality | 73.24 |
| Sample_T5C_k141_98453              | 26000  | 28  | 20 | 0   | Medium-quality | 73.15 |
| Sample_C1A_k141_132159             | 134831 | 121 | 1  | 90  | Medium-quality | 73.13 |
| Sample_C13A_k141_3640              | 28903  | 40  | 16 | 2   | Medium-quality | 73.11 |
| Sample_T7A_k141_91157              | 29486  | 41  | 5  | 0   | Medium-quality | 73.1  |
| Sample_T8C_k141_1695               | 27587  | 41  | 9  | 2   | Medium-quality | 73.09 |
| Sample_C9B_k141_62585_fragment_1   | 52736  | 68  | 23 | 10  | Medium-quality | 73.08 |
| Sample_C13C_k141_37609_fragment_3  | 42701  | 63  | 24 | 2   | Medium-quality | 72.93 |
| Sample_C12B_k141_93914             | 108478 | 101 | 1  | 46  | Medium-quality | 72.92 |
| Sample_C11A_k141_123683            | 59299  | 59  | 10 | 5   | Medium-quality | 72.92 |
| Sample_C6C_k141_67134              | 36162  | 41  | 10 | 0   | Medium-quality | 72.87 |
| Sample_T8C_k141_75613              | 63604  | 70  | 2  | 9   | Medium-quality | 72.84 |
| Sample_T5B_k141_20444              | 30047  | 27  | 2  | 2   | Medium-quality | 72.84 |
| Sample_C10B_k141_73255             | 27343  | 44  | 15 | 0   | Medium-quality | 72.83 |
| Sample_C10A_k141_150640            | 108354 | 158 | 12 | 9   | Medium-quality | 72.81 |
| Sample_C10A_k141_216407            | 13369  | 12  | 1  | 3   | Medium-quality | 72.8  |
| Sample_T16B_k141_168011            | 41925  | 52  | 2  | 5   | Medium-quality | 72.76 |
| Sample_T8B_k141_121576             | 56115  | 61  | 1  | 11  | Medium-quality | 72.7  |
| Sample_C8A_k141_79685              | 23987  | 31  | 17 | 1   | Medium-quality | 72.7  |
| Sample_T10A_k141_124490            | 28277  | 34  | 11 | 0   | Medium-quality | 72.67 |
| Sample_T2B_k141_199148_fragment_1  | 32116  | 35  | 6  | 3   | Medium-quality | 72.64 |
| Sample_C2C_k141_84123              | 107982 | 106 | 1  | 82  | Medium-quality | 72.59 |
| Sample_T15C_k141_27034             | 291100 | 271 | 9  | 165 | Medium-quality | 72.57 |
| Sample_T14A_k141_73625_fragment_1  | 58433  | 77  | 5  | 23  | Medium-quality | 72.57 |
| Sample_T8A_k141_41143_fragment_2   | 37942  | 56  | 19 | 2   | Medium-quality | 72.56 |
| Sample_C2B_k141_240195             | 105617 | 126 | 2  | 94  | Medium-quality | 72.55 |
| Sample_C13B_k141_20660_fragment_2  | 52412  | 63  | 12 | 2   | Medium-quality | 72.53 |

|                                    |        |     |    |    |                |       |
|------------------------------------|--------|-----|----|----|----------------|-------|
| Sample_T15B_k141_124710_fragment_1 | 70584  | 66  | 24 | 6  | Medium-quality | 72.49 |
| Sample_T12A_k141_4045              | 42118  | 53  | 20 | 1  | Medium-quality | 72.44 |
| Sample_T15A_k141_97405_fragment_1  | 49773  | 63  | 3  | 3  | Medium-quality | 72.4  |
| Sample_C2C_k141_133539             | 39132  | 63  | 25 | 2  | Medium-quality | 72.29 |
| Sample_T12A_k141_113291_fragment_1 | 27745  | 38  | 7  | 0  | Medium-quality | 72.28 |
| Sample_C11A_k141_106062_fragment_1 | 33476  | 50  | 2  | 2  | Medium-quality | 72.24 |
| Sample_C11A_k141_159685            | 71411  | 68  | 1  | 40 | Medium-quality | 72.21 |
| Sample_C5A_k141_144148_fragment_2  | 23040  | 33  | 14 | 1  | Medium-quality | 72.21 |
| Sample_T10A_k141_83827_fragment_1  | 39891  | 55  | 41 | 1  | Medium-quality | 72.18 |
| Sample_C4C_k141_266338             | 29369  | 39  | 11 | 0  | Medium-quality | 72.06 |
| Sample_T18B_k141_141223            | 29380  | 40  | 17 | 0  | Medium-quality | 72.06 |
| Sample_T5C_k141_54538_fragment_2   | 39702  | 57  | 8  | 3  | Medium-quality | 72.03 |
| Sample_C11B_k141_36149             | 34173  | 40  | 20 | 1  | Medium-quality | 72.02 |
| Sample_C2C_k141_196281             | 27286  | 42  | 12 | 0  | Medium-quality | 72.02 |
| Sample_C13A_k141_66427             | 9831   | 13  | 4  | 0  | Medium-quality | 71.97 |
| Sample_T14C_k141_92994             | 24832  | 26  | 19 | 0  | Medium-quality | 71.91 |
| Sample_C10A_k141_225427            | 53625  | 49  | 2  | 14 | Medium-quality | 71.9  |
| Sample_C10A_k141_107905_fragment_2 | 51833  | 66  | 13 | 2  | Medium-quality | 71.9  |
| Sample_T16A_k141_27181_fragment_1  | 46264  | 56  | 13 | 2  | Medium-quality | 71.89 |
| Sample_C9B_k141_26824              | 102132 | 118 | 2  | 39 | Medium-quality | 71.87 |
| Sample_C3C_k141_191221             | 132486 | 121 | 1  | 91 | Medium-quality | 71.86 |
| Sample_C10A_k141_32819             | 111638 | 96  | 1  | 69 | Medium-quality | 71.85 |
| Sample_C1B_k141_128660             | 39272  | 58  | 14 | 1  | Medium-quality | 71.81 |
| Sample_C6C_k141_142243             | 90954  | 95  | 29 | 13 | Medium-quality | 71.79 |
| Sample_T14A_k141_141635            | 63288  | 75  | 10 | 8  | Medium-quality | 71.77 |
| Sample_C3A_k141_29431              | 111505 | 92  | 1  | 62 | Medium-quality | 71.76 |
| Sample_C4A_k141_96999              | 48362  | 44  | 1  | 12 | Medium-quality | 71.6  |
| Sample_T10C_k141_26859             | 20522  | 21  | 0  | 2  | Medium-quality | 71.53 |
| Sample_T10A_k141_5342_fragment_1   | 53920  | 75  | 12 | 11 | Medium-quality | 71.52 |
| Sample_T18C_k141_24890             | 39588  | 54  | 6  | 3  | Medium-quality | 71.44 |
| Sample_T14C_k141_98879             | 38107  | 60  | 8  | 4  | Medium-quality | 71.34 |
| Sample_T7A_k141_171912_fragment_4  | 33708  | 44  | 16 | 3  | Medium-quality | 71.27 |
| Sample_C12B_k141_66230             | 70206  | 84  | 2  | 19 | Medium-quality | 71.23 |
| Sample_T3C_k141_108881             | 25918  | 38  | 13 | 1  | Medium-quality | 71.18 |
| Sample_T2C_k141_14090_fragment_2   | 33690  | 46  | 19 | 1  | Medium-quality | 71.16 |
| Sample_T13A_k141_94757             | 27990  | 32  | 8  | 0  | Medium-quality | 71.13 |
| Sample_T4C_k141_100391             | 169814 | 206 | 11 | 7  | Medium-quality | 71.13 |
| Sample_T3A_k141_5604               | 28733  | 44  | 13 | 0  | Medium-quality | 71.11 |
| Sample_C11B_k141_153135            | 33054  | 32  | 1  | 5  | Medium-quality | 71.1  |

|                                   |        |     |    |     |                |       |
|-----------------------------------|--------|-----|----|-----|----------------|-------|
| Sample_C10A_k141_53561_fragment_1 | 33994  | 43  | 14 | 0   | Medium-quality | 71.1  |
| Sample_T11A_k141_31932_fragment_1 | 45531  | 52  | 24 | 8   | Medium-quality | 71.08 |
| Sample_T13B_k141_85617_fragment_1 | 27102  | 39  | 11 | 0   | Medium-quality | 71.07 |
| Sample_C2C_k141_288348            | 32062  | 54  | 15 | 0   | Medium-quality | 71.04 |
| Sample_T8C_k141_153951            | 26236  | 37  | 9  | 1   | Medium-quality | 71.01 |
| Sample_C2C_k141_178798            | 56255  | 83  | 8  | 1   | Medium-quality | 71    |
| Sample_C1C_k141_58204             | 165593 | 139 | 1  | 85  | Medium-quality | 70.94 |
| Sample_T7B_k141_81550             | 39547  | 36  | 1  | 8   | Medium-quality | 70.92 |
| Sample_C13B_k141_60371            | 46755  | 72  | 25 | 0   | Medium-quality | 70.92 |
| Sample_C1C_k141_48362             | 53656  | 43  | 0  | 12  | Medium-quality | 70.85 |
| Sample_T17A_k141_12249_fragment_1 | 37824  | 46  | 3  | 3   | Medium-quality | 70.82 |
| Sample_C7A_k141_9862              | 8987   | 15  | 6  | 0   | Medium-quality | 70.77 |
| Sample_T6A_k141_35720             | 46255  | 61  | 11 | 2   | Medium-quality | 70.74 |
| Sample_C11B_k141_202094           | 106876 | 133 | 17 | 4   | Medium-quality | 70.71 |
| Sample_C12C_k141_207242           | 33988  | 42  | 15 | 0   | Medium-quality | 70.68 |
| Sample_C4C_k141_213382            | 25428  | 41  | 13 | 0   | Medium-quality | 70.68 |
| Sample_T11B_k141_88766            | 17877  | 27  | 14 | 0   | Medium-quality | 70.66 |
| Sample_T2A_k141_91576             | 182592 | 150 | 1  | 101 | Medium-quality | 70.62 |
| Sample_T16C_k141_32061            | 30520  | 43  | 16 | 0   | Medium-quality | 70.6  |
| Sample_C6A_k141_47244             | 38261  | 46  | 10 | 2   | Medium-quality | 70.58 |
| Sample_T12A_k141_34901            | 82519  | 79  | 2  | 23  | Medium-quality | 70.56 |
| Sample_T1C_k141_53403_fragment_1  | 26383  | 31  | 20 | 0   | Medium-quality | 70.53 |
| Sample_T11B_k141_19768            | 33507  | 44  | 9  | 2   | Medium-quality | 70.48 |
| Sample_T4A_k141_68123             | 93747  | 69  | 2  | 45  | Medium-quality | 70.45 |
| Sample_T10A_k141_77740_fragment_2 | 22150  | 31  | 23 | 1   | Medium-quality | 70.42 |
| Sample_T6B_k141_72159             | 16258  | 22  | 7  | 0   | Medium-quality | 70.41 |
| Sample_C6C_k141_145636            | 81728  | 110 | 8  | 11  | Medium-quality | 70.39 |
| Sample_C12B_k141_164197           | 23990  | 34  | 9  | 1   | Medium-quality | 70.33 |
| Sample_T14B_k141_179823           | 32379  | 40  | 1  | 5   | Medium-quality | 70.25 |
| Sample_C6B_k141_47274             | 56069  | 59  | 4  | 27  | Medium-quality | 70.23 |
| Sample_T2B_k141_145221_fragment_1 | 39606  | 53  | 8  | 2   | Medium-quality | 70.23 |
| Sample_T6C_k141_149574            | 10271  | 17  | 0  | 0   | Medium-quality | 70.18 |
| Sample_C8B_k141_200111_fragment_1 | 32099  | 47  | 31 | 0   | Medium-quality | 70.17 |
| Sample_C5B_k141_58709             | 58861  | 59  | 1  | 24  | Medium-quality | 70.09 |
| Sample_T8A_k141_238841            | 59766  | 49  | 7  | 7   | Medium-quality | 70.06 |
| Sample_T7C_k141_81877             | 41969  | 47  | 7  | 1   | Medium-quality | 70    |
| Sample_T11A_k141_20225_fragment_1 | 35547  | 44  | 8  | 0   | Medium-quality | 69.98 |
| Sample_C7A_k141_137528_fragment_1 | 32544  | 40  | 21 | 0   | Medium-quality | 69.97 |
| Sample_T5A_k141_32917_fragment_2  | 20181  | 26  | 10 | 0   | Medium-quality | 69.96 |

|                                    |        |     |    |    |                |       |
|------------------------------------|--------|-----|----|----|----------------|-------|
| Sample_T7A_k141_24808              | 52810  | 70  | 13 | 3  | Medium-quality | 69.96 |
| Sample_T16B_k141_41122             | 30178  | 40  | 2  | 0  | Medium-quality | 69.94 |
| Sample_T5C_k141_56394              | 36479  | 50  | 16 | 2  | Medium-quality | 69.92 |
| Sample_C13A_k141_112738_fragment_1 | 33837  | 44  | 8  | 0  | Medium-quality | 69.91 |
| Sample_T7A_k141_133633             | 24791  | 26  | 19 | 0  | Medium-quality | 69.91 |
| Sample_T12A_k141_45471             | 10815  | 14  | 0  | 0  | Medium-quality | 69.85 |
| Sample_T4C_k141_59763_fragment_1   | 58734  | 65  | 17 | 12 | Medium-quality | 69.82 |
| Sample_T13C_k141_94783             | 81437  | 100 | 3  | 9  | Medium-quality | 69.79 |
| Sample_C10A_k141_44268             | 40712  | 45  | 11 | 4  | Medium-quality | 69.78 |
| Sample_T2B_k141_79480              | 46321  | 87  | 23 | 1  | Medium-quality | 69.78 |
| Sample_T8B_k141_6701               | 27895  | 40  | 13 | 0  | Medium-quality | 69.77 |
| Sample_C8B_k141_49247              | 71447  | 85  | 2  | 12 | Medium-quality | 69.74 |
| Sample_T11C_k141_154022            | 80894  | 69  | 2  | 7  | Medium-quality | 69.74 |
| Sample_T13C_k141_116468            | 57482  | 77  | 14 | 2  | Medium-quality | 69.72 |
| Sample_C9A_k141_112208_fragment_2  | 56682  | 57  | 25 | 11 | Medium-quality | 69.7  |
| Sample_C12C_k141_38518             | 30869  | 43  | 19 | 3  | Medium-quality | 69.69 |
| Sample_T5B_k141_6263_fragment_1    | 59137  | 62  | 14 | 6  | Medium-quality | 69.59 |
| Sample_T4A_k141_65300              | 128227 | 121 | 1  | 33 | Medium-quality | 69.55 |
| Sample_C4C_k141_161569             | 129949 | 107 | 2  | 70 | Medium-quality | 69.53 |
| Sample_T17B_k141_12158             | 109736 | 116 | 1  | 46 | Medium-quality | 69.52 |
| Sample_T10A_k141_88923             | 44158  | 62  | 17 | 2  | Medium-quality | 69.47 |
| Sample_C9C_k141_18685              | 49707  | 39  | 0  | 16 | Medium-quality | 69.46 |
| Sample_T6A_k141_282109_fragment_1  | 104112 | 125 | 17 | 4  | Medium-quality | 69.45 |
| Sample_C2C_k141_178646             | 70038  | 65  | 2  | 37 | Medium-quality | 69.43 |
| Sample_T12A_k141_36040             | 35271  | 47  | 26 | 6  | Medium-quality | 69.34 |
| Sample_T4B_k141_312806             | 29122  | 25  | 0  | 17 | Medium-quality | 69.29 |
| Sample_C10C_k141_200306            | 43209  | 62  | 1  | 4  | Medium-quality | 69.26 |
| Sample_C10A_k141_312842            | 41545  | 45  | 8  | 2  | Medium-quality | 69.18 |
| Sample_T16C_k141_2871              | 19841  | 15  | 0  | 8  | Medium-quality | 69.16 |
| Sample_T2C_k141_198556_fragment_1  | 31973  | 53  | 21 | 1  | Medium-quality | 69.16 |
| Sample_C11B_k141_31792_fragment_1  | 22357  | 31  | 24 | 0  | Medium-quality | 69.08 |
| Sample_T5B_k141_45131              | 31068  | 44  | 14 | 2  | Medium-quality | 69.07 |
| Sample_C2C_k141_178430_fragment_1  | 23679  | 37  | 12 | 1  | Medium-quality | 68.98 |
| Sample_T18A_k141_123447            | 95695  | 97  | 1  | 37 | Medium-quality | 68.94 |
| Sample_T12B_k141_97391_fragment_1  | 50837  | 73  | 15 | 5  | Medium-quality | 68.9  |
| Sample_C4C_k141_201635             | 29028  | 51  | 17 | 0  | Medium-quality | 68.83 |
| Sample_C12C_k141_206829            | 15650  | 19  | 8  | 0  | Medium-quality | 68.8  |
| Sample_C8B_k141_181930             | 35375  | 47  | 6  | 3  | Medium-quality | 68.75 |
| Sample_T7A_k141_208194_fragment_1  | 34367  | 37  | 4  | 3  | Medium-quality | 68.74 |



|                                    |        |     |    |     |                |       |
|------------------------------------|--------|-----|----|-----|----------------|-------|
| Sample_C4B_k141_70909              | 33496  | 34  | 1  | 20  | Medium-quality | 68.67 |
| Sample_C11A_k141_67576             | 57515  | 81  | 10 | 2   | Medium-quality | 68.66 |
| Sample_C2C_k141_221798             | 128224 | 114 | 1  | 66  | Medium-quality | 68.64 |
| Sample_T11B_k141_83310             | 31912  | 26  | 0  | 8   | Medium-quality | 68.64 |
| Sample_T10C_k141_39212             | 41479  | 62  | 17 | 0   | Medium-quality | 68.6  |
| Sample_T3B_k141_56224              | 28252  | 32  | 22 | 2   | Medium-quality | 68.59 |
| Sample_C8B_k141_191456             | 25189  | 33  | 14 | 1   | Medium-quality | 68.58 |
| Sample_T3C_k141_131781_fragment_1  | 37802  | 43  | 11 | 0   | Medium-quality | 68.58 |
| Sample_C9A_k141_126286_fragment_1  | 26398  | 44  | 6  | 3   | Medium-quality | 68.52 |
| Sample_C3A_k141_85758              | 27638  | 48  | 19 | 0   | Medium-quality | 68.51 |
| Sample_T18B_k141_17597             | 65720  | 53  | 3  | 18  | Medium-quality | 68.46 |
| Sample_T17A_k141_34714             | 191624 | 247 | 1  | 14  | Medium-quality | 68.46 |
| Sample_C11B_k141_113682_fragment_1 | 41740  | 84  | 10 | 1   | Medium-quality | 68.45 |
| Sample_C14A_k141_98805_fragment_1  | 30628  | 39  | 4  | 1   | Medium-quality | 68.41 |
| Sample_C10C_k141_49307             | 236439 | 222 | 16 | 129 | Medium-quality | 68.36 |
| Sample_T2C_k141_33307_fragment_2   | 31795  | 36  | 15 | 0   | Medium-quality | 68.36 |
| Sample_C4B_k141_6688               | 130480 | 135 | 1  | 72  | Medium-quality | 68.33 |
| Sample_T15A_k141_111022_fragment_1 | 26478  | 43  | 15 | 1   | Medium-quality | 68.3  |
| Sample_T17C_k141_14754_fragment_1  | 46285  | 64  | 11 | 4   | Medium-quality | 68.28 |
| Sample_C2C_k141_69545              | 25063  | 25  | 7  | 0   | Medium-quality | 68.22 |
| Sample_C13A_k141_92645             | 15596  | 20  | 10 | 0   | Medium-quality | 68.17 |
| Sample_C4A_k141_101462_fragment_1  | 25470  | 45  | 10 | 0   | Medium-quality | 68.16 |
| Sample_T2C_k141_276846             | 15697  | 20  | 10 | 0   | Medium-quality | 68.12 |
| Sample_C6A_k141_112330             | 15133  | 19  | 6  | 0   | Medium-quality | 68.11 |
| Sample_C11A_k141_186272            | 37965  | 34  | 10 | 0   | Medium-quality | 68.08 |
| Sample_C2A_k141_147698             | 8092   | 11  | 0  | 5   | Medium-quality | 68.07 |
| Sample_T16A_k141_118145            | 97026  | 81  | 0  | 74  | Medium-quality | 68.07 |
| Sample_C9A_k141_99058              | 25132  | 44  | 17 | 1   | Medium-quality | 68.07 |
| Sample_T14A_k141_85439_fragment_1  | 32183  | 36  | 12 | 0   | Medium-quality | 68.07 |
| Sample_T8C_k141_10341              | 35617  | 46  | 16 | 6   | Medium-quality | 68.05 |
| Sample_C4B_k141_130849             | 85514  | 113 | 24 | 3   | Medium-quality | 68.04 |
| Sample_C8C_k141_119772_fragment_1  | 12967  | 18  | 3  | 0   | Medium-quality | 68.04 |
| Sample_T2A_k141_219421_fragment_2  | 40990  | 51  | 14 | 6   | Medium-quality | 68.02 |
| Sample_T2A_k141_253968             | 138455 | 121 | 1  | 65  | Medium-quality | 67.91 |
| Sample_T5B_k141_35277              | 31639  | 36  | 15 | 0   | Medium-quality | 67.87 |
| Sample_T15C_k141_53883             | 27922  | 40  | 12 | 1   | Medium-quality | 67.8  |
| Sample_T15A_k141_117618            | 28455  | 43  | 13 | 0   | Medium-quality | 67.79 |
| Sample_T2C_k141_45468              | 111629 | 149 | 23 | 4   | Medium-quality | 67.77 |
| Sample_T6C_k141_32217              | 25951  | 37  | 20 | 0   | Medium-quality | 67.77 |

|                                    |        |     |    |     |                |       |
|------------------------------------|--------|-----|----|-----|----------------|-------|
| Sample_T15A_k141_149040            | 80402  | 94  | 3  | 3   | Medium-quality | 67.75 |
| Sample_T6B_k141_145255             | 27607  | 44  | 17 | 0   | Medium-quality | 67.73 |
| Sample_T8B_k141_184526             | 15831  | 21  | 7  | 0   | Medium-quality | 67.72 |
| Sample_T13A_k141_36206             | 28284  | 28  | 5  | 0   | Medium-quality | 67.71 |
| Sample_T5C_k141_171024             | 15568  | 22  | 7  | 0   | Medium-quality | 67.71 |
| Sample_T4B_k141_261231             | 28453  | 31  | 0  | 21  | Medium-quality | 67.7  |
| Sample_T16C_k141_68905             | 32103  | 42  | 21 | 0   | Medium-quality | 67.64 |
| Sample_C14B_k141_9282              | 28883  | 45  | 17 | 0   | Medium-quality | 67.63 |
| Sample_C7A_k141_79811              | 49969  | 57  | 8  | 4   | Medium-quality | 67.62 |
| Sample_T12C_k141_45806             | 15567  | 21  | 9  | 0   | Medium-quality | 67.62 |
| Sample_C10C_k141_105925            | 22243  | 33  | 13 | 1   | Medium-quality | 67.58 |
| Sample_C9B_k141_11312              | 32678  | 31  | 7  | 2   | Medium-quality | 67.51 |
| Sample_T4A_k141_19376              | 81858  | 81  | 2  | 53  | Medium-quality | 67.43 |
| Sample_T2B_k141_148595_fragment_1  | 46519  | 64  | 22 | 5   | Medium-quality | 67.39 |
| Sample_C3A_k141_379                | 39784  | 41  | 1  | 9   | Medium-quality | 67.35 |
| Sample_T10C_k141_5323              | 27198  | 23  | 6  | 0   | Medium-quality | 67.35 |
| Sample_C2C_k141_281474             | 9214   | 12  | 4  | 0   | Medium-quality | 67.34 |
| Sample_T2C_k141_238894             | 9382   | 16  | 5  | 1   | Medium-quality | 67.29 |
| Sample_C1A_k141_28229_fragment_1   | 27267  | 38  | 17 | 0   | Medium-quality | 67.23 |
| Sample_T10A_k141_181671_fragment_1 | 45812  | 54  | 10 | 7   | Medium-quality | 67.15 |
| Sample_C3C_k141_109001             | 27888  | 36  | 2  | 1   | Medium-quality | 67.13 |
| Sample_C2A_k141_144100             | 69002  | 89  | 2  | 22  | Medium-quality | 67.12 |
| Sample_T3A_k141_7551               | 31777  | 42  | 19 | 0   | Medium-quality | 67.12 |
| Sample_T2B_k141_258884_fragment_1  | 29599  | 45  | 21 | 0   | Medium-quality | 67.11 |
| Sample_T11C_k141_35983_fragment_1  | 30639  | 50  | 12 | 0   | Medium-quality | 67.06 |
| Sample_C1A_k141_237796             | 159336 | 156 | 1  | 105 | Medium-quality | 66.99 |
| Sample_T2B_k141_263738             | 99903  | 80  | 1  | 61  | Medium-quality | 66.94 |
| Sample_C7A_k141_88379              | 34033  | 51  | 18 | 0   | Medium-quality | 66.92 |
| Sample_T15A_k141_14802             | 26116  | 21  | 0  | 10  | Medium-quality | 66.91 |
| Sample_T10C_k141_48321_fragment_1  | 22675  | 35  | 12 | 0   | Medium-quality | 66.91 |
| Sample_C4C_k141_212533_fragment_1  | 25237  | 39  | 13 | 0   | Medium-quality | 66.88 |
| Sample_C10A_k141_66888             | 99945  | 85  | 2  | 47  | Medium-quality | 66.82 |
| Sample_C8B_k141_70923              | 24670  | 27  | 7  | 1   | Medium-quality | 66.82 |
| Sample_T14B_k141_215017            | 57794  | 44  | 1  | 28  | Medium-quality | 66.79 |
| Sample_T13B_k141_120787_fragment_1 | 43236  | 55  | 11 | 3   | Medium-quality | 66.79 |
| Sample_T3C_k141_121174             | 8718   | 13  | 3  | 0   | Medium-quality | 66.7  |
| Sample_T6B_k141_129970             | 32955  | 44  | 2  | 0   | Medium-quality | 66.69 |
| Sample_C7B_k141_44995              | 36101  | 50  | 5  | 1   | Medium-quality | 66.68 |
| Sample_T8C_k141_7779_fragment_2    | 31925  | 46  | 27 | 2   | Medium-quality | 66.59 |

|                                    |        |     |    |    |                |       |
|------------------------------------|--------|-----|----|----|----------------|-------|
| Sample_C14B_k141_56736             | 23406  | 29  | 16 | 0  | Medium-quality | 66.57 |
| Sample_C6C_k141_146986             | 29326  | 39  | 2  | 3  | Medium-quality | 66.57 |
| Sample_C9A_k141_5824_fragment_1    | 24156  | 31  | 15 | 0  | Medium-quality | 66.55 |
| Sample_C10A_k141_208618_fragment_1 | 30673  | 41  | 25 | 0  | Medium-quality | 66.52 |
| Sample_T12C_k141_192242            | 29836  | 43  | 12 | 0  | Medium-quality | 66.37 |
| Sample_C3B_k141_121193             | 31054  | 36  | 1  | 7  | Medium-quality | 66.33 |
| Sample_T11C_k141_122742_fragment_1 | 39109  | 49  | 19 | 4  | Medium-quality | 66.33 |
| Sample_C10A_k141_286043            | 22901  | 34  | 14 | 1  | Medium-quality | 66.32 |
| Sample_C11B_k141_25089_fragment_1  | 45294  | 54  | 27 | 6  | Medium-quality | 66.32 |
| Sample_C10A_k141_190834_fragment_1 | 52544  | 78  | 26 | 10 | Medium-quality | 66.29 |
| Sample_C8C_k141_83428              | 49510  | 35  | 0  | 17 | Medium-quality | 66.22 |
| Sample_C2A_k141_228560             | 25904  | 42  | 5  | 0  | Medium-quality | 66.16 |
| Sample_C9C_k141_49901_fragment_2   | 73280  | 74  | 11 | 2  | Medium-quality | 66.14 |
| Sample_C2C_k141_211777             | 83506  | 87  | 2  | 25 | Medium-quality | 66.11 |
| Sample_T12A_k141_69488_fragment_2  | 30598  | 40  | 7  | 2  | Medium-quality | 66.09 |
| Sample_T7A_k141_66312              | 11809  | 20  | 3  | 0  | Medium-quality | 66.03 |
| Sample_C9A_k141_121675             | 37939  | 53  | 19 | 3  | Medium-quality | 66.02 |
| Sample_C8A_k141_100624_fragment_1  | 41478  | 48  | 24 | 0  | Medium-quality | 65.96 |
| Sample_T15C_k141_66608             | 36085  | 56  | 25 | 2  | Medium-quality | 65.94 |
| Sample_T1B_k141_27422              | 25540  | 34  | 12 | 2  | Medium-quality | 65.89 |
| Sample_T7A_k141_101544             | 26899  | 33  | 20 | 0  | Medium-quality | 65.89 |
| Sample_T10B_k141_100071_fragment_1 | 144400 | 130 | 4  | 15 | Medium-quality | 65.83 |
| Sample_T8C_k141_212113             | 23407  | 34  | 18 | 0  | Medium-quality | 65.79 |
| Sample_C5B_k141_29296_fragment_1   | 21337  | 30  | 23 | 0  | Medium-quality | 65.78 |
| Sample_T16B_k141_54099             | 106031 | 112 | 1  | 41 | Medium-quality | 65.74 |
| Sample_C12A_k141_66845             | 30551  | 36  | 0  | 5  | Medium-quality | 65.72 |
| Sample_T7B_k141_110896_fragment_3  | 28281  | 42  | 8  | 1  | Medium-quality | 65.71 |
| Sample_T11C_k141_154884_fragment_1 | 29850  | 41  | 15 | 3  | Medium-quality | 65.62 |
| Sample_C9A_k141_60789_fragment_1   | 27606  | 41  | 14 | 0  | Medium-quality | 65.57 |
| Sample_C2B_k141_226693             | 56735  | 54  | 1  | 41 | Medium-quality | 65.56 |
| Sample_T5C_k141_4922               | 72573  | 89  | 1  | 40 | Medium-quality | 65.53 |
| Sample_T3C_k141_51664              | 39858  | 60  | 25 | 0  | Medium-quality | 65.46 |
| Sample_T4C_k141_17071_fragment_1   | 29782  | 46  | 13 | 0  | Medium-quality | 65.46 |
| Sample_C8B_k141_189510             | 26282  | 39  | 15 | 2  | Medium-quality | 65.45 |
| Sample_C12C_k141_169010            | 54055  | 67  | 25 | 9  | Medium-quality | 65.41 |
| Sample_T3A_k141_1195               | 30240  | 38  | 1  | 8  | Medium-quality | 65.4  |
| Sample_T1B_k141_6393               | 39618  | 74  | 18 | 2  | Medium-quality | 65.37 |
| Sample_C11C_k141_77552_fragment_1  | 35492  | 50  | 16 | 0  | Medium-quality | 65.35 |
| Sample_C10B_k141_34029             | 35359  | 59  | 15 | 0  | Medium-quality | 65.26 |

|                                    |        |     |    |    |                |       |
|------------------------------------|--------|-----|----|----|----------------|-------|
| Sample_C14C_k141_155034            | 22099  | 32  | 8  | 0  | Medium-quality | 65.21 |
| Sample_C1A_k141_257562             | 28348  | 37  | 3  | 3  | Medium-quality | 65.17 |
| Sample_T15B_k141_140832            | 32763  | 47  | 18 | 1  | Medium-quality | 65.17 |
| Sample_C10A_k141_261508            | 22486  | 32  | 12 | 0  | Medium-quality | 65.16 |
| Sample_C1C_k141_158474_fragment_2  | 40424  | 53  | 21 | 1  | Medium-quality | 65.12 |
| Sample_C12B_k141_118772            | 51163  | 47  | 0  | 22 | Medium-quality | 65.1  |
| Sample_T4B_k141_149752             | 82863  | 90  | 1  | 31 | Medium-quality | 65.09 |
| Sample_C13C_k141_79647_fragment_1  | 32454  | 36  | 16 | 0  | Medium-quality | 65.07 |
| Sample_T11B_k141_154560            | 41881  | 52  | 7  | 2  | Medium-quality | 65.05 |
| Sample_C12C_k141_21538             | 8245   | 14  | 2  | 0  | Medium-quality | 64.98 |
| Sample_C5A_k141_120591_fragment_1  | 71497  | 96  | 5  | 8  | Medium-quality | 64.98 |
| Sample_T3A_k141_27585_fragment_1   | 26340  | 44  | 8  | 1  | Medium-quality | 64.97 |
| Sample_T17A_k141_30864             | 38893  | 41  | 0  | 12 | Medium-quality | 64.96 |
| Sample_C8A_k141_113838             | 15059  | 19  | 7  | 0  | Medium-quality | 64.94 |
| Sample_C4C_k141_242757             | 35389  | 57  | 8  | 1  | Medium-quality | 64.92 |
| Sample_C14A_k141_190663            | 25384  | 39  | 11 | 1  | Medium-quality | 64.91 |
| Sample_T3B_k141_52419              | 40435  | 59  | 14 | 0  | Medium-quality | 64.9  |
| Sample_T2C_k141_108733_fragment_1  | 39315  | 55  | 9  | 2  | Medium-quality | 64.83 |
| Sample_C4B_k141_87779              | 29239  | 29  | 1  | 15 | Medium-quality | 64.8  |
| Sample_C12B_k141_171581_fragment_1 | 32934  | 48  | 14 | 3  | Medium-quality | 64.79 |
| Sample_T3C_k141_23780_fragment_1   | 25574  | 34  | 9  | 0  | Medium-quality | 64.78 |
| Sample_T17C_k141_5723              | 11880  | 19  | 1  | 0  | Medium-quality | 64.7  |
| Sample_C13A_k141_48846             | 38222  | 47  | 17 | 1  | Medium-quality | 64.66 |
| Sample_C13C_k141_72236             | 37813  | 54  | 19 | 1  | Medium-quality | 64.64 |
| Sample_T4B_k141_312409             | 32680  | 37  | 1  | 16 | Medium-quality | 64.6  |
| Sample_C10A_k141_335615            | 24843  | 28  | 6  | 1  | Medium-quality | 64.58 |
| Sample_T18B_k141_94457             | 31049  | 48  | 17 | 0  | Medium-quality | 64.58 |
| Sample_C3C_k141_245408_fragment_2  | 43402  | 56  | 13 | 9  | Medium-quality | 64.5  |
| Sample_T13C_k141_45867             | 111293 | 115 | 3  | 13 | Medium-quality | 64.44 |
| Sample_C11C_k141_168300            | 87600  | 109 | 25 | 1  | Medium-quality | 64.41 |
| Sample_C8A_k141_96157              | 28026  | 39  | 1  | 1  | Medium-quality | 64.4  |
| Sample_C14A_k141_51343             | 160274 | 149 | 1  | 84 | Medium-quality | 64.37 |
| Sample_C3C_k141_110465_fragment_1  | 36300  | 44  | 8  | 5  | Medium-quality | 64.34 |
| Sample_C1A_k141_213369             | 122533 | 109 | 3  | 71 | Medium-quality | 64.32 |
| Sample_C5B_k141_22462_fragment_1   | 32357  | 42  | 28 | 2  | Medium-quality | 64.31 |
| Sample_C4B_k141_227392             | 55637  | 53  | 1  | 11 | Medium-quality | 64.29 |
| Sample_C3C_k141_81281_fragment_3   | 24900  | 31  | 17 | 1  | Medium-quality | 64.28 |
| Sample_T2B_k141_256156             | 8796   | 11  | 3  | 0  | Medium-quality | 64.26 |
| Sample_T4B_k141_163379             | 71693  | 67  | 1  | 45 | Medium-quality | 64.16 |

|                                    |        |     |    |    |                |       |
|------------------------------------|--------|-----|----|----|----------------|-------|
| Sample_C5A_k141_31733_fragment_1   | 24235  | 37  | 19 | 0  | Medium-quality | 64.15 |
| Sample_T8B_k141_163875             | 28236  | 43  | 23 | 1  | Medium-quality | 64.11 |
| Sample_C1C_k141_2362               | 144787 | 177 | 10 | 29 | Medium-quality | 64.09 |
| Sample_C2C_k141_41267              | 118141 | 84  | 1  | 59 | Medium-quality | 64.08 |
| Sample_C3A_k141_165857             | 119543 | 117 | 1  | 67 | Medium-quality | 63.99 |
| Sample_T5C_k141_180566_fragment_1  | 22717  | 27  | 2  | 0  | Medium-quality | 63.96 |
| Sample_T11C_k141_72411             | 41479  | 50  | 10 | 10 | Medium-quality | 63.93 |
| Sample_C4B_k141_158862_fragment_1  | 34415  | 44  | 19 | 0  | Medium-quality | 63.92 |
| Sample_C5A_k141_100811             | 32693  | 44  | 8  | 2  | Medium-quality | 63.88 |
| Sample_C10A_k141_8109              | 24604  | 33  | 14 | 0  | Medium-quality | 63.88 |
| Sample_C2C_k141_208839             | 55240  | 43  | 1  | 27 | Medium-quality | 63.84 |
| Sample_T5C_k141_98847              | 103284 | 103 | 1  | 51 | Medium-quality | 63.82 |
| Sample_T8C_k141_22422              | 29850  | 35  | 8  | 2  | Medium-quality | 63.81 |
| Sample_T17C_k141_22156             | 162262 | 127 | 2  | 84 | Medium-quality | 63.77 |
| Sample_T6B_k141_104178             | 64674  | 103 | 28 | 5  | Medium-quality | 63.76 |
| Sample_C10A_k141_201062            | 27092  | 17  | 0  | 2  | Medium-quality | 63.75 |
| Sample_C5A_k141_191831             | 81156  | 67  | 1  | 49 | Medium-quality | 63.75 |
| Sample_T10C_k141_83130             | 56181  | 65  | 8  | 3  | Medium-quality | 63.74 |
| Sample_C5A_k141_182490             | 34124  | 38  | 16 | 6  | Medium-quality | 63.73 |
| Sample_T4C_k141_17037              | 30396  | 47  | 22 | 3  | Medium-quality | 63.73 |
| Sample_T13B_k141_131786_fragment_1 | 29972  | 39  | 23 | 0  | Medium-quality | 63.72 |
| Sample_T2B_k141_65122              | 42084  | 39  | 1  | 11 | Medium-quality | 63.68 |
| Sample_C5A_k141_57669              | 94688  | 67  | 1  | 30 | Medium-quality | 63.65 |
| Sample_C13A_k141_69240             | 55027  | 56  | 1  | 47 | Medium-quality | 63.59 |
| Sample_T12C_k141_108633            | 8683   | 14  | 2  | 0  | Medium-quality | 63.58 |
| Sample_C12A_k141_64493             | 57400  | 46  | 1  | 12 | Medium-quality | 63.57 |
| Sample_T6C_k141_7875               | 51443  | 74  | 35 | 8  | Medium-quality | 63.52 |
| Sample_C4A_k141_157033_fragment_1  | 33939  | 32  | 14 | 2  | Medium-quality | 63.5  |
| Sample_C4C_k141_33821              | 25016  | 37  | 17 | 0  | Medium-quality | 63.46 |
| Sample_C5A_k141_174626             | 41458  | 55  | 10 | 4  | Medium-quality | 63.44 |
| Sample_C4B_k141_159698             | 102640 | 114 | 1  | 50 | Medium-quality | 63.43 |
| Sample_T15A_k141_127655            | 60801  | 58  | 1  | 26 | Medium-quality | 63.43 |
| Sample_C5A_k141_27971              | 22489  | 28  | 13 | 0  | Medium-quality | 63.42 |
| Sample_T11C_k141_153295            | 68986  | 81  | 17 | 1  | Medium-quality | 63.41 |
| Sample_T4A_k141_21061              | 33532  | 34  | 10 | 3  | Medium-quality | 63.4  |
| Sample_T8C_k141_73427_fragment_1   | 68488  | 63  | 9  | 4  | Medium-quality | 63.4  |
| Sample_C12C_k141_220605_fragment_1 | 23859  | 36  | 3  | 1  | Medium-quality | 63.35 |
| Sample_C10A_k141_172610            | 24646  | 42  | 10 | 0  | Medium-quality | 63.31 |
| Sample_T11C_k141_156497            | 25309  | 36  | 19 | 0  | Medium-quality | 63.3  |

|                                   |        |     |    |    |                |       |
|-----------------------------------|--------|-----|----|----|----------------|-------|
| Sample_T4B_k141_132775            | 25931  | 35  | 11 | 1  | Medium-quality | 63.28 |
| Sample_C10C_k141_65428            | 29217  | 38  | 21 | 0  | Medium-quality | 63.26 |
| Sample_C14A_k141_109520           | 8053   | 10  | 1  | 0  | Medium-quality | 63.26 |
| Sample_T12C_k141_19949            | 44210  | 33  | 2  | 7  | Medium-quality | 63.2  |
| Sample_T11B_k141_19142            | 22036  | 30  | 15 | 1  | Medium-quality | 63.17 |
| Sample_C6B_k141_44192             | 33003  | 51  | 14 | 3  | Medium-quality | 63.16 |
| Sample_T12C_k141_73657            | 49035  | 37  | 1  | 7  | Medium-quality | 63.08 |
| Sample_T15A_k141_24109            | 43069  | 31  | 1  | 8  | Medium-quality | 63.02 |
| Sample_T14B_k141_65973            | 17620  | 24  | 2  | 1  | Medium-quality | 63.01 |
| Sample_T13A_k141_14829            | 24093  | 27  | 12 | 0  | Medium-quality | 63    |
| Sample_C12B_k141_147771           | 26864  | 50  | 13 | 0  | Medium-quality | 62.93 |
| Sample_T4B_k141_63033_fragment_1  | 35570  | 49  | 19 | 4  | Medium-quality | 62.91 |
| Sample_T12C_k141_14724            | 97405  | 176 | 23 | 1  | Medium-quality | 62.89 |
| Sample_T6C_k141_225382            | 25082  | 29  | 20 | 0  | Medium-quality | 62.86 |
| Sample_C3A_k141_145173            | 24327  | 34  | 10 | 1  | Medium-quality | 62.84 |
| Sample_T10A_k141_8502_fragment_1  | 37752  | 42  | 9  | 0  | Medium-quality | 62.84 |
| Sample_C6B_k141_218086            | 102891 | 101 | 4  | 12 | Medium-quality | 62.83 |
| Sample_C2A_k141_98256             | 111152 | 111 | 1  | 66 | Medium-quality | 62.8  |
| Sample_T2A_k141_128830_fragment_1 | 64458  | 64  | 24 | 7  | Medium-quality | 62.69 |
| Sample_C7A_k141_94781             | 127800 | 128 | 1  | 51 | Medium-quality | 62.68 |
| Sample_T14C_k141_83992_fragment_4 | 34657  | 45  | 16 | 3  | Medium-quality | 62.68 |
| Sample_C5A_k141_226701            | 27612  | 34  | 1  | 1  | Medium-quality | 62.66 |
| Sample_T4B_k141_299985            | 30378  | 48  | 2  | 2  | Medium-quality | 62.66 |
| Sample_T14A_k141_132046           | 49158  | 71  | 13 | 4  | Medium-quality | 62.64 |
| Sample_C5A_k141_112900            | 31520  | 37  | 2  | 4  | Medium-quality | 62.56 |
| Sample_C2C_k141_79401             | 44624  | 55  | 1  | 24 | Medium-quality | 62.55 |
| Sample_C6B_k141_165965            | 82754  | 89  | 1  | 65 | Medium-quality | 62.55 |
| Sample_T16A_k141_29017_fragment_1 | 23468  | 23  | 14 | 1  | Medium-quality | 62.53 |
| Sample_T2A_k141_98930_fragment_1  | 79950  | 111 | 14 | 13 | Medium-quality | 62.53 |
| Sample_T17B_k141_31867            | 25129  | 27  | 9  | 0  | Medium-quality | 62.42 |
| Sample_T14A_k141_214427           | 94372  | 131 | 18 | 2  | Medium-quality | 62.41 |
| Sample_T13C_k141_21039_fragment_1 | 60133  | 72  | 14 | 10 | Medium-quality | 62.4  |
| Sample_C3C_k141_33671_fragment_2  | 38922  | 58  | 20 | 0  | Medium-quality | 62.36 |
| Sample_C2A_k141_272691            | 23391  | 36  | 11 | 2  | Medium-quality | 62.23 |
| Sample_C6B_k141_13063             | 116046 | 146 | 20 | 5  | Medium-quality | 62.23 |
| Sample_T12B_k141_133128           | 33858  | 47  | 14 | 0  | Medium-quality | 62.22 |
| Sample_T16B_k141_150234           | 24826  | 28  | 9  | 1  | Medium-quality | 62.21 |
| Sample_T10A_k141_157265           | 26159  | 39  | 14 | 0  | Medium-quality | 62.21 |
| Sample_T2C_k141_120802            | 106474 | 93  | 2  | 51 | Medium-quality | 62.2  |

|                                    |        |     |    |    |                |       |
|------------------------------------|--------|-----|----|----|----------------|-------|
| Sample_C12C_k141_150409            | 23397  | 33  | 16 | 0  | Medium-quality | 62.19 |
| Sample_T7A_k141_35174              | 28908  | 25  | 0  | 6  | Medium-quality | 62.18 |
| Sample_T17A_k141_19155             | 28452  | 30  | 16 | 2  | Medium-quality | 62.15 |
| Sample_C8C_k141_53832              | 160849 | 150 | 2  | 22 | Medium-quality | 62.13 |
| Sample_C6B_k141_133785             | 49987  | 58  | 4  | 21 | Medium-quality | 62.11 |
| Sample_C13B_k141_58618             | 47213  | 50  | 2  | 14 | Medium-quality | 62.1  |
| Sample_T13C_k141_110355            | 30527  | 45  | 15 | 2  | Medium-quality | 62.04 |
| Sample_T5C_k141_110669             | 31224  | 38  | 1  | 23 | Medium-quality | 62.03 |
| Sample_C12A_k141_2995_fragment_1   | 20169  | 34  | 11 | 1  | Medium-quality | 62.01 |
| Sample_T5A_k141_54332              | 56852  | 60  | 2  | 11 | Medium-quality | 61.88 |
| Sample_C12C_k141_121202            | 35882  | 50  | 7  | 2  | Medium-quality | 61.86 |
| Sample_C2A_k141_74650              | 46055  | 40  | 2  | 23 | Medium-quality | 61.85 |
| Sample_C12B_k141_58369             | 14223  | 24  | 1  | 1  | Medium-quality | 61.76 |
| Sample_T2C_k141_142981             | 53426  | 41  | 1  | 22 | Medium-quality | 61.74 |
| Sample_C8C_k141_20925              | 222326 | 196 | 12 | 58 | Medium-quality | 61.73 |
| Sample_T7A_k141_658                | 52847  | 54  | 2  | 33 | Medium-quality | 61.71 |
| Sample_T18B_k141_4006_fragment_2   | 23315  | 37  | 5  | 0  | Medium-quality | 61.71 |
| Sample_C2C_k141_201825_fragment_2  | 28162  | 40  | 21 | 1  | Medium-quality | 61.68 |
| Sample_T14A_k141_197014_fragment_1 | 23719  | 31  | 11 | 0  | Medium-quality | 61.65 |
| Sample_C13B_k141_64840             | 113600 | 107 | 1  | 28 | Medium-quality | 61.61 |
| Sample_T7B_k141_69439              | 28003  | 40  | 12 | 0  | Medium-quality | 61.53 |
| Sample_C4A_k141_31203              | 53889  | 62  | 20 | 6  | Medium-quality | 61.51 |
| Sample_C6B_k141_197660             | 29280  | 40  | 16 | 0  | Medium-quality | 61.5  |
| Sample_C10B_k141_42177             | 113358 | 89  | 1  | 40 | Medium-quality | 61.47 |
| Sample_T11A_k141_44439             | 39331  | 39  | 1  | 24 | Medium-quality | 61.42 |
| Sample_C8C_k141_145683_fragment_1  | 37199  | 54  | 13 | 8  | Medium-quality | 61.37 |
| Sample_T10A_k141_140208_fragment_1 | 43435  | 57  | 7  | 5  | Medium-quality | 61.37 |
| Sample_C11B_k141_165848            | 7221   | 14  | 5  | 0  | Medium-quality | 61.35 |
| Sample_C2C_k141_110192_fragment_1  | 113852 | 183 | 22 | 5  | Medium-quality | 61.31 |
| Sample_C2C_k141_181360             | 114483 | 104 | 1  | 60 | Medium-quality | 61.29 |
| Sample_C3B_k141_116525             | 53644  | 69  | 7  | 3  | Medium-quality | 61.28 |
| Sample_C13A_k141_109419            | 68311  | 96  | 15 | 1  | Medium-quality | 61.26 |
| Sample_C13B_k141_15207             | 58011  | 88  | 12 | 0  | Medium-quality | 61.26 |
| Sample_C4A_k141_190056_fragment_1  | 20597  | 31  | 4  | 2  | Medium-quality | 61.25 |
| Sample_T16C_k141_25843             | 30459  | 42  | 18 | 4  | Medium-quality | 61.25 |
| Sample_C4B_k141_18805              | 24457  | 41  | 11 | 1  | Medium-quality | 61.22 |
| Sample_T13B_k141_137304_fragment_1 | 30692  | 31  | 11 | 3  | Medium-quality | 61.21 |
| Sample_C8C_k141_132732             | 37181  | 43  | 23 | 1  | Medium-quality | 61.19 |
| Sample_C14B_k141_104700            | 23718  | 30  | 15 | 0  | Medium-quality | 61.17 |

|                                    |        |     |    |     |                |       |
|------------------------------------|--------|-----|----|-----|----------------|-------|
| Sample_C11A_k141_68298_fragment_1  | 37659  | 54  | 16 | 2   | Medium-quality | 61.15 |
| Sample_T16B_k141_96942_fragment_1  | 98415  | 147 | 25 | 2   | Medium-quality | 61.12 |
| Sample_T1C_k141_18679              | 12878  | 13  | 0  | 8   | Medium-quality | 61.09 |
| Sample_T12A_k141_59716             | 7837   | 12  | 2  | 0   | Medium-quality | 61.08 |
| Sample_C11C_k141_97978_fragment_1  | 12732  | 14  | 1  | 1   | Medium-quality | 61.03 |
| Sample_C2B_k141_284463             | 33775  | 42  | 16 | 2   | Medium-quality | 61.03 |
| Sample_C11B_k141_9955_fragment_1   | 38363  | 50  | 5  | 5   | Medium-quality | 61.01 |
| Sample_C13C_k141_35471             | 106301 | 111 | 24 | 2   | Medium-quality | 61.01 |
| Sample_T5B_k141_5135               | 40334  | 39  | 0  | 16  | Medium-quality | 60.99 |
| Sample_T11A_k141_64652             | 27182  | 44  | 19 | 0   | Medium-quality | 60.97 |
| Sample_T13A_k141_97947             | 46505  | 44  | 2  | 24  | Medium-quality | 60.95 |
| Sample_C4A_k141_191465             | 349120 | 348 | 23 | 224 | Medium-quality | 60.94 |
| Sample_C2A_k141_73277              | 11619  | 13  | 6  | 0   | Medium-quality | 60.94 |
| Sample_T6A_k141_172440             | 8417   | 9   | 5  | 0   | Medium-quality | 60.87 |
| Sample_T8B_k141_117236             | 35206  | 43  | 3  | 2   | Medium-quality | 60.86 |
| Sample_T1A_k141_42366              | 43415  | 28  | 0  | 11  | Medium-quality | 60.83 |
| Sample_C12C_k141_240827            | 21497  | 28  | 10 | 0   | Medium-quality | 60.74 |
| Sample_C6A_k141_201742             | 151810 | 164 | 2  | 69  | Medium-quality | 60.67 |
| Sample_T12C_k141_14381             | 46407  | 73  | 8  | 2   | Medium-quality | 60.66 |
| Sample_C11C_k141_178920_fragment_3 | 21344  | 24  | 6  | 4   | Medium-quality | 60.63 |
| Sample_T12A_k141_100710            | 35722  | 42  | 25 | 1   | Medium-quality | 60.62 |
| Sample_T17A_k141_38116             | 29242  | 51  | 12 | 2   | Medium-quality | 60.62 |
| Sample_C10A_k141_216084            | 67064  | 80  | 1  | 45  | Medium-quality | 60.56 |
| Sample_T3B_k141_83235_fragment_1   | 44556  | 71  | 28 | 0   | Medium-quality | 60.54 |
| Sample_C6C_k141_205312             | 93259  | 83  | 1  | 68  | Medium-quality | 60.35 |
| Sample_T4B_k141_231502_fragment_1  | 16964  | 20  | 13 | 1   | Medium-quality | 60.28 |
| Sample_T17B_k141_26391             | 49257  | 46  | 0  | 31  | Medium-quality | 60.27 |
| Sample_C2B_k141_103692             | 26797  | 26  | 0  | 18  | Medium-quality | 60.23 |
| Sample_C8C_k141_83692              | 38563  | 41  | 1  | 34  | Medium-quality | 60.22 |
| Sample_C13C_k141_13419_fragment_1  | 27857  | 35  | 21 | 2   | Medium-quality | 60.22 |
| Sample_T5C_k141_165743             | 20956  | 28  | 9  | 1   | Medium-quality | 60.15 |
| Sample_C2A_k141_4958               | 94919  | 108 | 1  | 20  | Medium-quality | 60.13 |
| Sample_T8A_k141_69628_fragment_1   | 42177  | 54  | 18 | 3   | Medium-quality | 60.13 |
| Sample_T17A_k141_40895             | 21097  | 36  | 14 | 0   | Medium-quality | 60.12 |
| Sample_T15A_k141_73687             | 41783  | 38  | 1  | 11  | Medium-quality | 60    |
| Sample_T6C_k141_197361             | 30142  | 23  | 1  | 8   | Medium-quality | 59.96 |
| Sample_C4B_k141_92779_fragment_1   | 29324  | 43  | 24 | 4   | Medium-quality | 59.96 |
| Sample_T5C_k141_91016              | 41136  | 37  | 1  | 12  | Medium-quality | 59.94 |
| Sample_C14A_k141_172954            | 21504  | 25  | 14 | 0   | Medium-quality | 59.87 |



|                                    |        |     |    |     |                |       |
|------------------------------------|--------|-----|----|-----|----------------|-------|
| Sample_T12A_k141_327611            | 75078  | 154 | 13 | 3   | Medium-quality | 59.87 |
| Sample_C10A_k141_208590_fragment_1 | 25068  | 32  | 6  | 0   | Medium-quality | 59.84 |
| Sample_C9A_k141_15473_fragment_1   | 37605  | 56  | 14 | 5   | Medium-quality | 59.83 |
| Sample_T11A_k141_4241_fragment_1   | 26094  | 37  | 7  | 1   | Medium-quality | 59.83 |
| Sample_T13B_k141_175420            | 105335 | 90  | 1  | 62  | Medium-quality | 59.8  |
| Sample_T5A_k141_36234              | 36251  | 50  | 12 | 5   | Medium-quality | 59.79 |
| Sample_T17C_k141_9107              | 87217  | 74  | 1  | 63  | Medium-quality | 59.75 |
| Sample_C8B_k141_202900_fragment_1  | 30813  | 40  | 8  | 3   | Medium-quality | 59.74 |
| Sample_T6C_k141_121960             | 22892  | 32  | 4  | 1   | Medium-quality | 59.72 |
| Sample_T18C_k141_93980_fragment_1  | 25167  | 33  | 18 | 2   | Medium-quality | 59.67 |
| Sample_C5C_k141_95381              | 19435  | 29  | 22 | 2   | Medium-quality | 59.62 |
| Sample_C5A_k141_279842             | 22530  | 28  | 12 | 0   | Medium-quality | 59.61 |
| Sample_T4B_k141_239997_fragment_2  | 21751  | 24  | 10 | 5   | Medium-quality | 59.6  |
| Sample_T3A_k141_66246              | 37986  | 46  | 10 | 9   | Medium-quality | 59.56 |
| Sample_T12A_k141_85626             | 47673  | 73  | 7  | 1   | Medium-quality | 59.48 |
| Sample_C4A_k141_30381              | 57470  | 48  | 2  | 14  | Medium-quality | 59.47 |
| Sample_T15B_k141_83010             | 19212  | 29  | 9  | 0   | Medium-quality | 59.45 |
| Sample_C9A_k141_81979              | 58048  | 39  | 0  | 17  | Medium-quality | 59.44 |
| Sample_C9B_k141_98451              | 195914 | 175 | 2  | 118 | Medium-quality | 59.42 |
| Sample_C4C_k141_160581_fragment_1  | 33328  | 46  | 20 | 0   | Medium-quality | 59.42 |
| Sample_C4B_k141_205339_fragment_1  | 22216  | 33  | 16 | 2   | Medium-quality | 59.41 |
| Sample_C7B_k141_180709             | 22865  | 31  | 17 | 0   | Medium-quality | 59.35 |
| Sample_C13C_k141_83957_fragment_1  | 35008  | 56  | 10 | 1   | Medium-quality | 59.32 |
| Sample_T2B_k141_31100              | 35548  | 48  | 11 | 0   | Medium-quality | 59.32 |
| Sample_C3C_k141_206706             | 35919  | 63  | 10 | 0   | Medium-quality | 59.29 |
| Sample_T11B_k141_118919            | 30829  | 39  | 14 | 0   | Medium-quality | 59.27 |
| Sample_T17A_k141_45206             | 47898  | 55  | 7  | 5   | Medium-quality | 59.27 |
| Sample_C12C_k141_14905             | 38300  | 40  | 2  | 9   | Medium-quality | 59.23 |
| Sample_T2B_k141_292348             | 29567  | 29  | 1  | 10  | Medium-quality | 59.23 |
| Sample_C12A_k141_137967            | 44342  | 40  | 1  | 11  | Medium-quality | 59.21 |
| Sample_T11C_k141_135670            | 46161  | 55  | 8  | 6   | Medium-quality | 59.21 |
| Sample_C2B_k141_111577_fragment_1  | 23839  | 28  | 7  | 0   | Medium-quality | 59.15 |
| Sample_T16C_k141_135127            | 39115  | 41  | 0  | 14  | Medium-quality | 59.14 |
| Sample_T12A_k141_117026            | 24472  | 38  | 18 | 0   | Medium-quality | 59.13 |
| Sample_T7C_k141_79973              | 32712  | 63  | 9  | 4   | Medium-quality | 59.13 |
| Sample_C10A_k141_42513             | 49136  | 74  | 9  | 2   | Medium-quality | 59.12 |
| Sample_T4B_k141_174331             | 34070  | 61  | 7  | 2   | Medium-quality | 59.09 |
| Sample_C13C_k141_65976             | 23651  | 34  | 26 | 0   | Medium-quality | 59.04 |
| Sample_C10A_k141_106802            | 32524  | 49  | 7  | 4   | Medium-quality | 59    |

|                                    |        |     |    |    |                |       |
|------------------------------------|--------|-----|----|----|----------------|-------|
| Sample_C11A_k141_173511_fragment_1 | 26837  | 42  | 24 | 0  | Medium-quality | 58.98 |
| Sample_T3B_k141_13597              | 14929  | 28  | 11 | 0  | Medium-quality | 58.97 |
| Sample_T17B_k141_27582             | 25376  | 34  | 14 | 0  | Medium-quality | 58.96 |
| Sample_C11B_k141_36519             | 44231  | 52  | 23 | 5  | Medium-quality | 58.93 |
| Sample_T8A_k141_176147             | 31977  | 46  | 15 | 0  | Medium-quality | 58.91 |
| Sample_C5A_k141_130003             | 20415  | 14  | 0  | 4  | Medium-quality | 58.87 |
| Sample_T14C_k141_149756            | 20312  | 37  | 9  | 1  | Medium-quality | 58.84 |
| Sample_T4B_k141_173027_fragment_1  | 25355  | 38  | 6  | 0  | Medium-quality | 58.82 |
| Sample_T11C_k141_108371            | 47821  | 62  | 10 | 13 | Medium-quality | 58.81 |
| Sample_C2B_k141_113246_fragment_2  | 39892  | 57  | 24 | 0  | Medium-quality | 58.8  |
| Sample_C6A_k141_197687_fragment_2  | 40504  | 53  | 9  | 8  | Medium-quality | 58.74 |
| Sample_C8B_k141_164665             | 34902  | 60  | 13 | 0  | Medium-quality | 58.7  |
| Sample_T12C_k141_148758            | 47259  | 62  | 15 | 0  | Medium-quality | 58.69 |
| Sample_T8A_k141_200664             | 22363  | 34  | 3  | 0  | Medium-quality | 58.62 |
| Sample_C6A_k141_234415             | 6662   | 8   | 0  | 1  | Medium-quality | 58.6  |
| Sample_C3C_k141_183679             | 22865  | 36  | 5  | 0  | Medium-quality | 58.57 |
| Sample_T14B_k141_180460_fragment_1 | 45227  | 64  | 28 | 3  | Medium-quality | 58.57 |
| Sample_T17B_k141_12511             | 32363  | 39  | 7  | 6  | Medium-quality | 58.53 |
| Sample_C8B_k141_22819              | 33241  | 37  | 5  | 0  | Medium-quality | 58.49 |
| Sample_T5B_k141_3404               | 37074  | 50  | 18 | 8  | Medium-quality | 58.48 |
| Sample_C5A_k141_132241             | 35084  | 43  | 1  | 6  | Medium-quality | 58.46 |
| Sample_C11B_k141_132726            | 94561  | 91  | 1  | 40 | Medium-quality | 58.43 |
| Sample_T3C_k141_141865             | 8626   | 12  | 1  | 0  | Medium-quality | 58.43 |
| Sample_C13A_k141_410               | 28795  | 40  | 8  | 0  | Medium-quality | 58.4  |
| Sample_C11B_k141_229232            | 33828  | 40  | 11 | 2  | Medium-quality | 58.36 |
| Sample_T12A_k141_328740            | 22202  | 31  | 13 | 0  | Medium-quality | 58.33 |
| Sample_T12A_k141_115717            | 62659  | 58  | 1  | 28 | Medium-quality | 58.32 |
| Sample_C13C_k141_46875             | 144486 | 134 | 1  | 86 | Medium-quality | 58.23 |
| Sample_C5A_k141_258133_fragment_1  | 31589  | 48  | 15 | 6  | Medium-quality | 58.22 |
| Sample_T8B_k141_91416              | 24119  | 46  | 10 | 1  | Medium-quality | 58.22 |
| Sample_T15C_k141_141042            | 22421  | 36  | 12 | 0  | Medium-quality | 58.16 |
| Sample_C11A_k141_28400             | 23473  | 34  | 13 | 0  | Medium-quality | 58.14 |
| Sample_T7B_k141_137203_fragment_1  | 22447  | 29  | 15 | 0  | Medium-quality | 58.08 |
| Sample_T3C_k141_140226             | 73066  | 64  | 3  | 24 | Medium-quality | 58.07 |
| Sample_T8A_k141_78373              | 26255  | 30  | 7  | 3  | Medium-quality | 58.06 |
| Sample_T10C_k141_50951             | 39385  | 33  | 6  | 0  | Medium-quality | 58.05 |
| Sample_C8C_k141_61726              | 42983  | 58  | 18 | 6  | Medium-quality | 58.04 |
| Sample_T14C_k141_29643             | 94305  | 82  | 3  | 17 | Medium-quality | 58.03 |
| Sample_T14B_k141_38671_fragment_2  | 94836  | 126 | 20 | 14 | Medium-quality | 58.03 |

|                                    |        |     |    |    |                |       |
|------------------------------------|--------|-----|----|----|----------------|-------|
| Sample_T14A_k141_2991              | 40337  | 46  | 8  | 5  | Medium-quality | 57.95 |
| Sample_C7B_k141_126861             | 27431  | 45  | 9  | 1  | Medium-quality | 57.94 |
| Sample_T12A_k141_104510_fragment_1 | 99466  | 179 | 21 | 8  | Medium-quality | 57.94 |
| Sample_C8A_k141_77647              | 51744  | 52  | 0  | 26 | Medium-quality | 57.91 |
| Sample_C2A_k141_33756              | 25668  | 41  | 9  | 0  | Medium-quality | 57.86 |
| Sample_T12C_k141_91426             | 100702 | 110 | 24 | 1  | Medium-quality | 57.84 |
| Sample_T5A_k141_52939              | 25843  | 27  | 6  | 1  | Medium-quality | 57.84 |
| Sample_T6B_k141_89778              | 95077  | 123 | 7  | 9  | Medium-quality | 57.84 |
| Sample_C3A_k141_240061             | 22503  | 35  | 7  | 1  | Medium-quality | 57.8  |
| Sample_T7B_k141_50007_fragment_1   | 24469  | 31  | 16 | 1  | Medium-quality | 57.76 |
| Sample_C6A_k141_4795               | 57587  | 54  | 5  | 12 | Medium-quality | 57.75 |
| Sample_C4B_k141_214445             | 25998  | 26  | 4  | 3  | Medium-quality | 57.74 |
| Sample_C13B_k141_45242             | 22116  | 28  | 16 | 0  | Medium-quality | 57.74 |
| Sample_C9B_k141_41962              | 31827  | 33  | 5  | 0  | Medium-quality | 57.74 |
| Sample_T3A_k141_61275              | 27180  | 38  | 9  | 0  | Medium-quality | 57.73 |
| Sample_C12C_k141_105528            | 40956  | 34  | 1  | 9  | Medium-quality | 57.72 |
| Sample_C8C_k141_178226             | 97566  | 82  | 1  | 14 | Medium-quality | 57.68 |
| Sample_T3A_k141_51694              | 24407  | 37  | 18 | 0  | Medium-quality | 57.67 |
| Sample_T5B_k141_42381              | 54697  | 69  | 12 | 1  | Medium-quality | 57.67 |
| Sample_T2C_k141_89508              | 24360  | 46  | 9  | 0  | Medium-quality | 57.66 |
| Sample_T4B_k141_227991             | 23474  | 34  | 8  | 0  | Medium-quality | 57.63 |
| Sample_T14A_k141_79830             | 97428  | 94  | 1  | 36 | Medium-quality | 57.6  |
| Sample_T7A_k141_78895              | 26396  | 37  | 2  | 2  | Medium-quality | 57.59 |
| Sample_C6A_k141_13047_fragment_1   | 23681  | 41  | 21 | 0  | Medium-quality | 57.58 |
| Sample_T10A_k141_63300             | 23597  | 42  | 13 | 1  | Medium-quality | 57.56 |
| Sample_T10A_k141_96570_fragment_1  | 21656  | 28  | 18 | 0  | Medium-quality | 57.55 |
| Sample_C4B_k141_35464              | 24293  | 31  | 3  | 0  | Medium-quality | 57.54 |
| Sample_C11A_k141_65520             | 52630  | 43  | 1  | 12 | Medium-quality | 57.52 |
| Sample_T4A_k141_37325              | 39720  | 35  | 1  | 18 | Medium-quality | 57.48 |
| Sample_C8A_k141_174728_fragment_1  | 36897  | 39  | 33 | 0  | Medium-quality | 57.44 |
| Sample_T17C_k141_24451             | 27753  | 34  | 12 | 0  | Medium-quality | 57.42 |
| Sample_C1B_k141_19540              | 44418  | 46  | 2  | 8  | Medium-quality | 57.36 |
| Sample_T11B_k141_28724             | 23108  | 21  | 6  | 0  | Medium-quality | 57.29 |
| Sample_T8B_k141_259496             | 24948  | 36  | 13 | 1  | Medium-quality | 57.28 |
| Sample_C11B_k141_52285             | 24171  | 32  | 12 | 1  | Medium-quality | 57.27 |
| Sample_C2C_k141_141792             | 10574  | 16  | 1  | 2  | Medium-quality | 57.22 |
| Sample_T4B_k141_372710_fragment_1  | 54272  | 79  | 18 | 13 | Medium-quality | 57.22 |
| Sample_T17A_k141_11775             | 34231  | 36  | 0  | 8  | Medium-quality | 57.18 |
| Sample_T2C_k141_163656             | 23341  | 42  | 15 | 0  | Medium-quality | 57.13 |

|                                    |        |     |    |     |                |       |
|------------------------------------|--------|-----|----|-----|----------------|-------|
| Sample_T6C_k141_110689_fragment_1  | 21444  | 33  | 12 | 1   | Medium-quality | 57.12 |
| Sample_T2B_k141_78831              | 20099  | 28  | 13 | 0   | Medium-quality | 57.08 |
| Sample_T10A_k141_68511             | 8832   | 9   | 0  | 1   | Medium-quality | 57.05 |
| Sample_T4A_k141_37334              | 38579  | 36  | 11 | 4   | Medium-quality | 57    |
| Sample_T4B_k141_120433_fragment_1  | 25771  | 33  | 15 | 2   | Medium-quality | 56.99 |
| Sample_T2C_k141_213221_fragment_1  | 13883  | 17  | 7  | 2   | Medium-quality | 56.83 |
| Sample_C8B_k141_34571              | 27497  | 38  | 8  | 0   | Medium-quality | 56.81 |
| Sample_C12A_k141_148549            | 51916  | 75  | 3  | 9   | Medium-quality | 56.8  |
| Sample_T1B_k141_19497_fragment_2   | 25403  | 38  | 6  | 3   | Medium-quality | 56.78 |
| Sample_T12C_k141_9695              | 29065  | 36  | 0  | 6   | Medium-quality | 56.76 |
| Sample_C6B_k141_152435             | 140797 | 124 | 1  | 87  | Medium-quality | 56.74 |
| Sample_T16B_k141_164064            | 36166  | 29  | 0  | 22  | Medium-quality | 56.73 |
| Sample_T13B_k141_26525             | 35365  | 33  | 1  | 3   | Medium-quality | 56.72 |
| Sample_C8C_k141_91228              | 27443  | 34  | 8  | 1   | Medium-quality | 56.7  |
| Sample_T14A_k141_46019             | 20316  | 22  | 6  | 0   | Medium-quality | 56.69 |
| Sample_C13A_k141_68927             | 25672  | 25  | 4  | 0   | Medium-quality | 56.67 |
| Sample_T13C_k141_104609            | 25326  | 43  | 12 | 0   | Medium-quality | 56.63 |
| Sample_C8B_k141_105661             | 16323  | 21  | 0  | 0   | Medium-quality | 56.58 |
| Sample_C3C_k141_259132_fragment_1  | 22654  | 32  | 19 | 0   | Medium-quality | 56.58 |
| Sample_C4B_k141_107792             | 23731  | 21  | 0  | 16  | Medium-quality | 56.47 |
| Sample_T8A_k141_133571             | 37306  | 35  | 1  | 11  | Medium-quality | 56.45 |
| Sample_T12C_k141_81984             | 219667 | 183 | 5  | 102 | Medium-quality | 56.41 |
| Sample_T18B_k141_3075              | 33753  | 59  | 27 | 0   | Medium-quality | 56.33 |
| Sample_C10A_k141_316982_fragment_1 | 25967  | 30  | 17 | 0   | Medium-quality | 56.31 |
| Sample_C2A_k141_98060              | 25350  | 40  | 7  | 0   | Medium-quality | 56.29 |
| Sample_T3A_k141_117066             | 20961  | 26  | 11 | 0   | Medium-quality | 56.29 |
| Sample_T6A_k141_95493              | 24283  | 25  | 1  | 2   | Medium-quality | 56.28 |
| Sample_T5A_k141_12059              | 55865  | 86  | 10 | 3   | Medium-quality | 56.26 |
| Sample_C1C_k141_47039              | 100423 | 86  | 1  | 39  | Medium-quality | 56.25 |
| Sample_T2B_k141_26110_fragment_1   | 62354  | 87  | 6  | 8   | Medium-quality | 56.19 |
| Sample_T4B_k141_9950               | 26597  | 39  | 8  | 1   | Medium-quality | 56.15 |
| Sample_T8C_k141_121472_fragment_3  | 18518  | 20  | 0  | 2   | Medium-quality | 56.08 |
| Sample_C7A_k141_110889             | 22611  | 37  | 20 | 0   | Medium-quality | 56.07 |
| Sample_C4B_k141_225070             | 21166  | 33  | 4  | 0   | Medium-quality | 56.02 |
| Sample_C3A_k141_185155             | 21285  | 31  | 13 | 1   | Medium-quality | 55.98 |
| Sample_C12A_k141_145080            | 19133  | 27  | 5  | 0   | Medium-quality | 55.97 |
| Sample_C9B_k141_31504              | 20267  | 29  | 12 | 0   | Medium-quality | 55.83 |
| Sample_C1C_k141_91356_fragment_1   | 21025  | 28  | 3  | 0   | Medium-quality | 55.81 |
| Sample_T4B_k141_278325             | 21330  | 19  | 3  | 0   | Medium-quality | 55.8  |

|                                    |        |     |    |    |                |       |
|------------------------------------|--------|-----|----|----|----------------|-------|
| Sample_T15C_k141_20277             | 81604  | 62  | 3  | 10 | Medium-quality | 55.79 |
| Sample_T4C_k141_113092_fragment_1  | 48514  | 63  | 9  | 9  | Medium-quality | 55.77 |
| Sample_C3A_k141_145880             | 94559  | 63  | 1  | 46 | Medium-quality | 55.72 |
| Sample_T5A_k141_23495              | 18798  | 26  | 13 | 0  | Medium-quality | 55.7  |
| Sample_T6C_k141_254694             | 44749  | 74  | 19 | 6  | Medium-quality | 55.7  |
| Sample_C8B_k141_123385             | 27353  | 43  | 14 | 0  | Medium-quality | 55.68 |
| Sample_C4A_k141_182654             | 138108 | 134 | 1  | 83 | Medium-quality | 55.66 |
| Sample_C2B_k141_183591             | 48218  | 58  | 1  | 25 | Medium-quality | 55.64 |
| Sample_T4B_k141_90793              | 69989  | 71  | 1  | 7  | Medium-quality | 55.63 |
| Sample_T10A_k141_22909             | 42276  | 38  | 0  | 11 | Medium-quality | 55.58 |
| Sample_C10A_k141_135814            | 48157  | 48  | 1  | 21 | Medium-quality | 55.57 |
| Sample_T2A_k141_90145_fragment_1   | 61084  | 70  | 18 | 11 | Medium-quality | 55.56 |
| Sample_C13B_k141_87589             | 27147  | 32  | 6  | 0  | Medium-quality | 55.54 |
| Sample_T5B_k141_64801              | 19260  | 30  | 14 | 1  | Medium-quality | 55.53 |
| Sample_T5B_k141_54837              | 26023  | 39  | 9  | 0  | Medium-quality | 55.47 |
| Sample_T12C_k141_111627            | 35494  | 34  | 1  | 22 | Medium-quality | 55.43 |
| Sample_C2B_k141_216720             | 22614  | 48  | 4  | 0  | Medium-quality | 55.43 |
| Sample_T7A_k141_127299             | 19754  | 23  | 12 | 0  | Medium-quality | 55.43 |
| Sample_T7A_k141_183019             | 75623  | 82  | 2  | 16 | Medium-quality | 55.42 |
| Sample_T13C_k141_25399             | 19300  | 34  | 7  | 0  | Medium-quality | 55.41 |
| Sample_C5B_k141_32555              | 16458  | 21  | 6  | 0  | Medium-quality | 55.39 |
| Sample_C9A_k141_5227               | 24279  | 31  | 20 | 0  | Medium-quality | 55.39 |
| Sample_C2C_k141_240215             | 35466  | 38  | 1  | 17 | Medium-quality | 55.38 |
| Sample_T11B_k141_58168             | 23565  | 15  | 0  | 4  | Medium-quality | 55.38 |
| Sample_T2C_k141_10602              | 32552  | 43  | 8  | 1  | Medium-quality | 55.38 |
| Sample_T10A_k141_59716             | 22548  | 33  | 14 | 0  | Medium-quality | 55.33 |
| Sample_C11B_k141_19129             | 21212  | 28  | 14 | 0  | Medium-quality | 55.32 |
| Sample_C13B_k141_76267             | 23811  | 34  | 10 | 0  | Medium-quality | 55.3  |
| Sample_T4A_k141_52411_fragment_2   | 22207  | 23  | 16 | 0  | Medium-quality | 55.26 |
| Sample_C10A_k141_217231            | 66564  | 90  | 2  | 24 | Medium-quality | 55.25 |
| Sample_C14A_k141_117099            | 20282  | 31  | 10 | 0  | Medium-quality | 55.19 |
| Sample_T8C_k141_76980              | 8534   | 12  | 0  | 1  | Medium-quality | 55.16 |
| Sample_C3B_k141_258194             | 128149 | 116 | 1  | 90 | Medium-quality | 55.1  |
| Sample_T15C_k141_82646             | 47731  | 41  | 1  | 26 | Medium-quality | 55.07 |
| Sample_T11A_k141_48637             | 36821  | 52  | 18 | 8  | Medium-quality | 55.07 |
| Sample_T11A_k141_29962_fragment_1  | 39150  | 39  | 9  | 0  | Medium-quality | 54.98 |
| Sample_T13B_k141_129764_fragment_1 | 35119  | 49  | 36 | 0  | Medium-quality | 54.89 |
| Sample_C10A_k141_19668             | 142053 | 144 | 2  | 79 | Medium-quality | 54.82 |
| Sample_T7B_k141_48742              | 84664  | 74  | 1  | 30 | Medium-quality | 54.79 |

|                                   |       |     |    |    |                |       |
|-----------------------------------|-------|-----|----|----|----------------|-------|
| Sample_T13B_k141_73333            | 19378 | 33  | 7  | 0  | Medium-quality | 54.79 |
| Sample_C3A_k141_147232_fragment_1 | 36187 | 33  | 1  | 5  | Medium-quality | 54.76 |
| Sample_C2C_k141_132450_fragment_2 | 89969 | 155 | 23 | 6  | Medium-quality | 54.68 |
| Sample_C3A_k141_49112             | 61034 | 70  | 2  | 20 | Medium-quality | 54.65 |
| Sample_C2C_k141_86576_fragment_4  | 81233 | 82  | 5  | 17 | Medium-quality | 54.6  |
| Sample_C10A_k141_272202           | 43158 | 47  | 19 | 4  | Medium-quality | 54.59 |
| Sample_T8A_k141_152766            | 24561 | 40  | 2  | 0  | Medium-quality | 54.59 |
| Sample_T6A_k141_271052            | 36506 | 39  | 13 | 4  | Medium-quality | 54.53 |
| Sample_C6B_k141_27963             | 64287 | 70  | 2  | 48 | Medium-quality | 54.5  |
| Sample_T13B_k141_25172            | 19311 | 27  | 15 | 0  | Medium-quality | 54.5  |
| Sample_T16B_k141_56501            | 23543 | 36  | 4  | 1  | Medium-quality | 54.48 |
| Sample_T16A_k141_18367            | 42943 | 29  | 0  | 9  | Medium-quality | 54.46 |
| Sample_T6B_k141_36899             | 49397 | 49  | 1  | 39 | Medium-quality | 54.46 |
| Sample_T2A_k141_89228             | 20597 | 30  | 13 | 0  | Medium-quality | 54.45 |
| Sample_T7A_k141_95643             | 26021 | 33  | 12 | 0  | Medium-quality | 54.45 |
| Sample_C6C_k141_147124            | 22689 | 32  | 10 | 1  | Medium-quality | 54.44 |
| Sample_T15B_k141_51966            | 18864 | 9   | 0  | 4  | Medium-quality | 54.4  |
| Sample_T6B_k141_130619_fragment_2 | 22563 | 27  | 15 | 0  | Medium-quality | 54.36 |
| Sample_C11B_k141_21882_fragment_1 | 36324 | 40  | 13 | 10 | Medium-quality | 54.33 |
| Sample_T8B_k141_260852            | 27025 | 47  | 9  | 0  | Medium-quality | 54.32 |
| Sample_T2C_k141_19236             | 81039 | 56  | 1  | 38 | Medium-quality | 54.3  |
| Sample_T7C_k141_90633             | 21640 | 27  | 1  | 4  | Medium-quality | 54.3  |
| Sample_T16B_k141_87408            | 87285 | 124 | 26 | 0  | Medium-quality | 54.29 |
| Sample_T4C_k141_113584_fragment_2 | 23343 | 34  | 6  | 1  | Medium-quality | 54.26 |
| Sample_C6B_k141_137022            | 32423 | 29  | 9  | 4  | Medium-quality | 54.25 |
| Sample_C2A_k141_159016            | 54307 | 45  | 0  | 41 | Medium-quality | 54.22 |
| Sample_T13C_k141_80553            | 18914 | 26  | 11 | 2  | Medium-quality | 54.22 |
| Sample_C6C_k141_227080            | 83762 | 82  | 1  | 35 | Medium-quality | 54.21 |
| Sample_T15B_k141_39085            | 68166 | 130 | 13 | 2  | Medium-quality | 54.19 |
| Sample_T7A_k141_35824             | 37421 | 59  | 5  | 4  | Medium-quality | 54.18 |
| Sample_C9A_k141_99125_fragment_1  | 23676 | 29  | 19 | 0  | Medium-quality | 54.17 |
| Sample_T17C_k141_30894            | 21343 | 23  | 11 | 0  | Medium-quality | 54.12 |
| Sample_T7B_k141_145328            | 27719 | 36  | 11 | 0  | Medium-quality | 54.11 |
| Sample_C2A_k141_167560            | 6143  | 6   | 1  | 0  | Medium-quality | 54.1  |
| Sample_C4C_k141_120306            | 20900 | 15  | 3  | 0  | Medium-quality | 54.04 |
| Sample_C6C_k141_221381            | 75474 | 74  | 1  | 58 | Medium-quality | 54.02 |
| Sample_C8B_k141_69881_fragment_2  | 22659 | 29  | 17 | 0  | Medium-quality | 54.02 |
| Sample_T5A_k141_15112             | 38629 | 22  | 0  | 6  | Medium-quality | 53.98 |
| Sample_T15A_k141_85598            | 34549 | 38  | 1  | 21 | Medium-quality | 53.95 |

|                                   |        |     |    |    |                |       |
|-----------------------------------|--------|-----|----|----|----------------|-------|
| Sample_C1C_k141_78829             | 85473  | 95  | 6  | 9  | Medium-quality | 53.95 |
| Sample_C11B_k141_51008            | 63896  | 64  | 2  | 29 | Medium-quality | 53.93 |
| Sample_T2C_k141_215857_fragment_1 | 21200  | 20  | 4  | 1  | Medium-quality | 53.92 |
| Sample_T17B_k141_3507             | 25377  | 29  | 21 | 0  | Medium-quality | 53.91 |
| Sample_T14C_k141_52708_fragment_2 | 164154 | 168 | 1  | 9  | Medium-quality | 53.82 |
| Sample_T18C_k141_93172            | 22029  | 18  | 7  | 0  | Medium-quality | 53.82 |
| Sample_T12B_k141_182079           | 22010  | 28  | 17 | 0  | Medium-quality | 53.76 |
| Sample_C8A_k141_136687            | 34420  | 34  | 1  | 20 | Medium-quality | 53.75 |
| Sample_T6B_k141_17603_fragment_2  | 34599  | 39  | 8  | 2  | Medium-quality | 53.75 |
| Sample_T2C_k141_206550            | 20986  | 18  | 4  | 0  | Medium-quality | 53.72 |
| Sample_C3B_k141_98993_fragment_1  | 20261  | 25  | 14 | 0  | Medium-quality | 53.7  |
| Sample_T17B_k141_34535            | 93927  | 137 | 22 | 3  | Medium-quality | 53.68 |
| Sample_T3B_k141_148371            | 50569  | 55  | 14 | 10 | Medium-quality | 53.66 |
| Sample_T1A_k141_544               | 15549  | 19  | 7  | 0  | Medium-quality | 53.65 |
| Sample_T6B_k141_40065             | 28297  | 35  | 14 | 1  | Medium-quality | 53.6  |
| Sample_C2B_k141_270783            | 15920  | 17  | 6  | 0  | Medium-quality | 53.58 |
| Sample_C4A_k141_204664_fragment_1 | 23328  | 24  | 0  | 3  | Medium-quality | 53.57 |
| Sample_C10C_k141_118441           | 37267  | 25  | 1  | 14 | Medium-quality | 53.51 |
| Sample_C4C_k141_35203             | 80241  | 77  | 1  | 37 | Medium-quality | 53.4  |
| Sample_C3C_k141_117868            | 20947  | 12  | 4  | 0  | Medium-quality | 53.38 |
| Sample_C6B_k141_175277            | 18637  | 30  | 6  | 2  | Medium-quality | 53.36 |
| Sample_C14A_k141_100734           | 25956  | 33  | 10 | 1  | Medium-quality | 53.35 |
| Sample_C11A_k141_162967           | 21148  | 32  | 13 | 0  | Medium-quality | 53.34 |
| Sample_C4C_k141_218068            | 31899  | 31  | 0  | 9  | Medium-quality | 53.28 |
| Sample_C9B_k141_36912_fragment_1  | 27744  | 40  | 33 | 0  | Medium-quality | 53.28 |
| Sample_T8A_k141_92665             | 23341  | 27  | 1  | 0  | Medium-quality | 53.22 |
| Sample_C6C_k141_149724            | 26366  | 31  | 4  | 4  | Medium-quality | 53.2  |
| Sample_C2C_k141_154494            | 21700  | 28  | 17 | 0  | Medium-quality | 53.17 |
| Sample_C6A_k141_95801_fragment_1  | 30252  | 37  | 6  | 0  | Medium-quality | 53.17 |
| Sample_T10A_k141_162330           | 32942  | 46  | 7  | 3  | Medium-quality | 53.08 |
| Sample_T2C_k141_250314            | 24162  | 31  | 23 | 1  | Medium-quality | 53.06 |
| Sample_T6B_k141_124249            | 28797  | 48  | 11 | 0  | Medium-quality | 53.01 |
| Sample_T3B_k141_119750            | 6883   | 8   | 0  | 0  | Medium-quality | 53    |
| Sample_T13B_k141_91562            | 58061  | 42  | 1  | 32 | Medium-quality | 52.98 |
| Sample_T12C_k141_96722            | 20531  | 27  | 12 | 0  | Medium-quality | 52.98 |
| Sample_T8C_k141_139655            | 8191   | 13  | 1  | 0  | Medium-quality | 52.96 |
| Sample_C5C_k141_57060             | 21287  | 24  | 10 | 0  | Medium-quality | 52.95 |
| Sample_C12B_k141_142269           | 22238  | 24  | 0  | 8  | Medium-quality | 52.91 |
| Sample_C13B_k141_16326            | 26398  | 29  | 1  | 12 | Medium-quality | 52.88 |

|                                   |        |     |    |     |                |       |
|-----------------------------------|--------|-----|----|-----|----------------|-------|
| Sample_C8B_k141_140600_fragment_1 | 23560  | 32  | 24 | 0   | Medium-quality | 52.85 |
| Sample_T14A_k141_208845           | 32701  | 45  | 10 | 2   | Medium-quality | 52.84 |
| Sample_T7A_k141_223563            | 21095  | 28  | 16 | 0   | Medium-quality | 52.83 |
| Sample_C10C_k141_37715_fragment_1 | 24888  | 33  | 14 | 1   | Medium-quality | 52.82 |
| Sample_C3A_k141_173087            | 22678  | 36  | 5  | 1   | Medium-quality | 52.79 |
| Sample_T12A_k141_318124           | 39683  | 39  | 1  | 12  | Medium-quality | 52.77 |
| Sample_T16C_k141_30958            | 26904  | 36  | 22 | 3   | Medium-quality | 52.77 |
| Sample_T16B_k141_122407           | 68391  | 88  | 1  | 15  | Medium-quality | 52.74 |
| Sample_T8B_k141_157621_fragment_1 | 57421  | 91  | 18 | 2   | Medium-quality | 52.69 |
| Sample_T8B_k141_98967_fragment_1  | 24728  | 26  | 13 | 0   | Medium-quality | 52.61 |
| Sample_T2B_k141_226299_fragment_1 | 6733   | 9   | 2  | 1   | Medium-quality | 52.58 |
| Sample_T12B_k141_157152           | 70165  | 92  | 19 | 0   | Medium-quality | 52.57 |
| Sample_C8A_k141_166317            | 30670  | 44  | 5  | 0   | Medium-quality | 52.56 |
| Sample_T7A_k141_144307_fragment_2 | 23157  | 14  | 3  | 1   | Medium-quality | 52.54 |
| Sample_C7A_k141_67810             | 21834  | 16  | 0  | 4   | Medium-quality | 52.5  |
| Sample_T8C_k141_99259             | 16614  | 21  | 17 | 1   | Medium-quality | 52.49 |
| Sample_C11C_k141_91386            | 37124  | 44  | 11 | 9   | Medium-quality | 52.48 |
| Sample_C5C_k141_40402             | 88722  | 74  | 0  | 67  | Medium-quality | 52.46 |
| Sample_T17C_k141_3415             | 307681 | 294 | 23 | 180 | Medium-quality | 52.44 |
| Sample_T5B_k141_77826             | 39120  | 45  | 9  | 3   | Medium-quality | 52.43 |
| Sample_C6B_k141_50502             | 39069  | 45  | 19 | 4   | Medium-quality | 52.42 |
| Sample_T11C_k141_28399            | 7837   | 15  | 0  | 1   | Medium-quality | 52.4  |
| Sample_T8A_k141_77934             | 107645 | 197 | 23 | 3   | Medium-quality | 52.4  |
| Sample_C8B_k141_85209             | 23009  | 35  | 2  | 1   | Medium-quality | 52.39 |
| Sample_T13C_k141_68229            | 22655  | 27  | 17 | 0   | Medium-quality | 52.39 |
| Sample_T11B_k141_16944            | 20289  | 31  | 15 | 0   | Medium-quality | 52.36 |
| Sample_C10B_k141_157019           | 135749 | 118 | 3  | 77  | Medium-quality | 52.35 |
| Sample_C13A_k141_13559            | 97370  | 100 | 1  | 73  | Medium-quality | 52.34 |
| Sample_T8A_k141_186121            | 10251  | 10  | 2  | 2   | Medium-quality | 52.31 |
| Sample_C4C_k141_166819            | 24843  | 28  | 17 | 1   | Medium-quality | 52.29 |
| Sample_C5A_k141_107357_fragment_1 | 22083  | 24  | 9  | 0   | Medium-quality | 52.29 |
| Sample_T4B_k141_220445            | 45292  | 47  | 1  | 29  | Medium-quality | 52.26 |
| Sample_C7B_k141_107894            | 24141  | 35  | 20 | 0   | Medium-quality | 52.26 |
| Sample_T16C_k141_44993            | 31264  | 31  | 0  | 3   | Medium-quality | 52.22 |
| Sample_T7A_k141_33424             | 24223  | 32  | 17 | 0   | Medium-quality | 52.19 |
| Sample_T11B_k141_40537            | 25777  | 28  | 11 | 1   | Medium-quality | 52.18 |
| Sample_T4C_k141_78938             | 30863  | 48  | 13 | 0   | Medium-quality | 52.14 |
| Sample_T4C_k141_30162             | 21934  | 27  | 9  | 0   | Medium-quality | 52.12 |
| Sample_C9C_k141_86314             | 24922  | 28  | 9  | 0   | Medium-quality | 52.07 |



|                                    |        |     |    |     |                |       |
|------------------------------------|--------|-----|----|-----|----------------|-------|
| Sample_T8B_k141_224230_fragment_1  | 32004  | 59  | 13 | 1   | Medium-quality | 52.06 |
| Sample_C3B_k141_21027              | 30468  | 38  | 15 | 8   | Medium-quality | 52.04 |
| Sample_T13B_k141_136803            | 19031  | 23  | 14 | 0   | Medium-quality | 52.04 |
| Sample_T8B_k141_236104             | 7438   | 13  | 1  | 0   | Medium-quality | 52.01 |
| Sample_C3C_k141_211170             | 29964  | 45  | 8  | 1   | Medium-quality | 51.99 |
| Sample_C8B_k141_198503             | 27688  | 33  | 26 | 2   | Medium-quality | 51.99 |
| Sample_C8C_k141_6024               | 17796  | 24  | 13 | 0   | Medium-quality | 51.98 |
| Sample_T16C_k141_82389             | 9424   | 10  | 4  | 0   | Medium-quality | 51.96 |
| Sample_C4B_k141_32952              | 20327  | 33  | 11 | 2   | Medium-quality | 51.95 |
| Sample_C4C_k141_242362             | 29811  | 22  | 3  | 3   | Medium-quality | 51.92 |
| Sample_T10B_k141_18626             | 35587  | 42  | 1  | 11  | Medium-quality | 51.85 |
| Sample_C6B_k141_147467             | 25521  | 27  | 3  | 2   | Medium-quality | 51.85 |
| Sample_C13C_k141_93875             | 34260  | 26  | 1  | 10  | Medium-quality | 51.84 |
| Sample_T10C_k141_29057             | 43112  | 51  | 9  | 5   | Medium-quality | 51.84 |
| Sample_C10B_k141_53584             | 19291  | 28  | 8  | 0   | Medium-quality | 51.83 |
| Sample_T7B_k141_58920              | 62635  | 56  | 11 | 26  | Medium-quality | 51.82 |
| Sample_T12B_k141_120816_fragment_1 | 21167  | 31  | 12 | 0   | Medium-quality | 51.79 |
| Sample_T6B_k141_41325              | 169028 | 143 | 2  | 101 | Medium-quality | 51.78 |
| Sample_T11A_k141_68611             | 37769  | 28  | 1  | 14  | Medium-quality | 51.76 |
| Sample_C13A_k141_3768_fragment_1   | 18005  | 22  | 10 | 0   | Medium-quality | 51.74 |
| Sample_T12A_k141_141700            | 23509  | 39  | 10 | 0   | Medium-quality | 51.73 |
| Sample_C2B_k141_124462             | 24478  | 25  | 9  | 1   | Medium-quality | 51.68 |
| Sample_C12A_k141_40579             | 20504  | 27  | 14 | 0   | Medium-quality | 51.63 |
| Sample_T12B_k141_96687_fragment_1  | 120566 | 114 | 16 | 3   | Medium-quality | 51.57 |
| Sample_T12A_k141_185044            | 21537  | 21  | 11 | 0   | Medium-quality | 51.56 |
| Sample_C10C_k141_174420            | 42661  | 57  | 2  | 14  | Medium-quality | 51.54 |
| Sample_C8A_k141_29379              | 21774  | 40  | 13 | 0   | Medium-quality | 51.51 |
| Sample_C2A_k141_44674              | 23177  | 42  | 15 | 0   | Medium-quality | 51.5  |
| Sample_T3C_k141_23862_fragment_1   | 23559  | 31  | 23 | 0   | Medium-quality | 51.5  |
| Sample_C9C_k141_23853_fragment_1   | 23166  | 16  | 3  | 0   | Medium-quality | 51.49 |
| Sample_C11A_k141_1637              | 137055 | 130 | 4  | 62  | Medium-quality | 51.48 |
| Sample_T6A_k141_202900             | 94146  | 94  | 4  | 8   | Medium-quality | 51.46 |
| Sample_C12A_k141_3735              | 16755  | 24  | 10 | 0   | Medium-quality | 51.44 |
| Sample_T5A_k141_58579_fragment_1   | 37319  | 50  | 21 | 0   | Medium-quality | 51.34 |
| Sample_T2B_k141_143454             | 17670  | 30  | 16 | 1   | Medium-quality | 51.29 |
| Sample_T6B_k141_171378             | 27818  | 40  | 12 | 0   | Medium-quality | 51.28 |
| Sample_T10A_k141_75015             | 16793  | 21  | 13 | 1   | Medium-quality | 51.25 |
| Sample_C3C_k141_57131              | 19587  | 28  | 11 | 0   | Medium-quality | 51.23 |
| Sample_C11A_k141_40478             | 98886  | 177 | 20 | 9   | Medium-quality | 51.19 |

|                                    |        |     |    |    |                |       |
|------------------------------------|--------|-----|----|----|----------------|-------|
| Sample_C5C_k141_110013             | 21365  | 31  | 16 | 0  | Medium-quality | 51.17 |
| Sample_C10A_k141_39315             | 44339  | 46  | 1  | 10 | Medium-quality | 51.16 |
| Sample_C12C_k141_128626_fragment_1 | 19992  | 33  | 16 | 1  | Medium-quality | 51.15 |
| Sample_C4A_k141_134253             | 23911  | 42  | 4  | 1  | Medium-quality | 51.1  |
| Sample_T8B_k141_263659             | 15847  | 18  | 6  | 0  | Medium-quality | 51.09 |
| Sample_T12C_k141_59375             | 29428  | 49  | 9  | 1  | Medium-quality | 51.07 |
| Sample_T6A_k141_164248             | 19562  | 24  | 3  | 0  | Medium-quality | 51.03 |
| Sample_T10B_k141_134585            | 131905 | 130 | 2  | 19 | Medium-quality | 50.95 |
| Sample_C4B_k141_114680             | 7169   | 13  | 0  | 0  | Medium-quality | 50.94 |
| Sample_C14C_k141_160769            | 23243  | 25  | 4  | 0  | Medium-quality | 50.92 |
| Sample_C7C_k141_38420_fragment_1   | 33885  | 50  | 16 | 1  | Medium-quality | 50.9  |
| Sample_C11C_k141_128759            | 22450  | 20  | 0  | 3  | Medium-quality | 50.89 |
| Sample_C10A_k141_235752            | 103268 | 121 | 2  | 97 | Medium-quality | 50.88 |
| Sample_T11A_k141_153660            | 24766  | 20  | 0  | 2  | Medium-quality | 50.8  |
| Sample_T10A_k141_9386              | 17760  | 22  | 13 | 0  | Medium-quality | 50.79 |
| Sample_T10A_k141_114684            | 13602  | 12  | 0  | 5  | Medium-quality | 50.78 |
| Sample_T5B_k141_59532              | 33535  | 30  | 1  | 6  | Medium-quality | 50.74 |
| Sample_C14C_k141_85472             | 24339  | 35  | 15 | 0  | Medium-quality | 50.73 |
| Sample_T11B_k141_145563            | 163695 | 131 | 17 | 83 | Medium-quality | 50.7  |
| Sample_T17A_k141_23531             | 38653  | 39  | 0  | 11 | Medium-quality | 50.7  |
| Sample_C3A_k141_2041               | 20687  | 31  | 17 | 0  | Medium-quality | 50.69 |
| Sample_T12A_k141_85234             | 9680   | 11  | 7  | 0  | Medium-quality | 50.62 |
| Sample_T11C_k141_39380             | 42505  | 35  | 1  | 3  | Medium-quality | 50.61 |
| Sample_T5C_k141_176725             | 21265  | 23  | 0  | 15 | Medium-quality | 50.6  |
| Sample_T17B_k141_9308              | 20625  | 28  | 14 | 0  | Medium-quality | 50.6  |
| Sample_T14A_k141_96193             | 36091  | 48  | 1  | 20 | Medium-quality | 50.59 |
| Sample_T2A_k141_135818             | 18525  | 27  | 3  | 2  | Medium-quality | 50.57 |
| Sample_T5A_k141_53982              | 19561  | 25  | 9  | 1  | Medium-quality | 50.57 |
| Sample_T12A_k141_252977            | 20482  | 18  | 12 | 0  | Medium-quality | 50.56 |
| Sample_T11C_k141_164548            | 24238  | 32  | 1  | 10 | Medium-quality | 50.54 |
| Sample_C7C_k141_54611              | 50909  | 67  | 16 | 5  | Medium-quality | 50.51 |
| Sample_C11B_k141_185575            | 19920  | 31  | 5  | 0  | Medium-quality | 50.46 |
| Sample_T15A_k141_110833            | 20057  | 26  | 9  | 1  | Medium-quality | 50.45 |
| Sample_C13A_k141_68869             | 30197  | 34  | 1  | 11 | Medium-quality | 50.44 |
| Sample_C4B_k141_178567_fragment_1  | 30882  | 30  | 21 | 0  | Medium-quality | 50.43 |
| Sample_T6B_k141_171406             | 22358  | 36  | 7  | 0  | Medium-quality | 50.42 |
| Sample_C10A_k141_94820             | 18329  | 21  | 14 | 0  | Medium-quality | 50.39 |
| Sample_T2C_k141_66727_fragment_1   | 22713  | 32  | 24 | 0  | Medium-quality | 50.39 |
| Sample_C6C_k141_7578               | 17293  | 25  | 11 | 0  | Medium-quality | 50.38 |

|                                    |        |     |    |     |                |       |
|------------------------------------|--------|-----|----|-----|----------------|-------|
| Sample_C9C_k141_26178              | 18971  | 31  | 8  | 1   | Medium-quality | 50.37 |
| Sample_T5A_k141_44063_fragment_1   | 20169  | 29  | 5  | 1   | Medium-quality | 50.37 |
| Sample_T13B_k141_2912              | 6797   | 9   | 1  | 2   | Medium-quality | 50.36 |
| Sample_T7B_k141_83223              | 19589  | 28  | 16 | 0   | Medium-quality | 50.35 |
| Sample_T10A_k141_59353             | 6762   | 9   | 1  | 0   | Medium-quality | 50.33 |
| Sample_T16C_k141_18585             | 269593 | 224 | 17 | 154 | Medium-quality | 50.33 |
| Sample_T12A_k141_344764            | 10655  | 16  | 1  | 0   | Medium-quality | 50.32 |
| Sample_C13A_k141_41495             | 41009  | 43  | 1  | 6   | Medium-quality | 50.31 |
| Sample_T2A_k141_231166             | 92692  | 88  | 1  | 27  | Medium-quality | 50.27 |
| Sample_C13C_k141_2926              | 20296  | 23  | 17 | 0   | Medium-quality | 50.26 |
| Sample_T5C_k141_103063_fragment_1  | 30977  | 51  | 9  | 0   | Medium-quality | 50.26 |
| Sample_C9A_k141_50067              | 21660  | 27  | 12 | 1   | Medium-quality | 50.19 |
| Sample_T12B_k141_90895             | 64371  | 117 | 4  | 5   | Medium-quality | 50.18 |
| Sample_C2C_k141_240077             | 42867  | 39  | 0  | 25  | Medium-quality | 50.17 |
| Sample_T13B_k141_101758_fragment_1 | 9065   | 10  | 2  | 0   | Medium-quality | 50.14 |
| Sample_C10C_k141_175679            | 19031  | 24  | 11 | 0   | Medium-quality | 50.13 |
| Sample_C2A_k141_169782             | 82770  | 90  | 23 | 1   | Medium-quality | 50.06 |
| Sample_C10C_k141_100557_fragment_1 | 25277  | 30  | 17 | 2   | Medium-quality | 50.03 |
| Sample_T14A_k141_138340            | 77299  | 83  | 1  | 53  | Medium-quality | 50.02 |
| Sample_C5A_k141_164826             | 6429   | 10  | 2  | 0   | Medium-quality | 50.02 |
| Sample_T4B_k141_119286             | 47570  | 63  | 7  | 12  | Low-quality    | 49.95 |
| Sample_T10A_k141_56109             | 18607  | 21  | 2  | 0   | Low-quality    | 49.94 |
| Sample_C11A_k141_39108             | 36069  | 54  | 17 | 1   | Low-quality    | 49.94 |
| Sample_C3B_k141_34198              | 30204  | 59  | 10 | 0   | Low-quality    | 49.94 |
| Sample_C3C_k141_224776_fragment_1  | 25453  | 35  | 20 | 0   | Low-quality    | 49.9  |
| Sample_T8C_k141_101186             | 29085  | 47  | 20 | 5   | Low-quality    | 49.89 |
| Sample_T5B_k141_35294              | 18228  | 15  | 0  | 8   | Low-quality    | 49.87 |
| Sample_C10A_k141_296053            | 24079  | 31  | 11 | 0   | Low-quality    | 49.86 |
| Sample_C3C_k141_39278              | 19973  | 33  | 16 | 0   | Low-quality    | 49.86 |
| Sample_C13C_k141_45196             | 29896  | 42  | 13 | 2   | Low-quality    | 49.85 |
| Sample_T12B_k141_63878             | 22473  | 30  | 12 | 0   | Low-quality    | 49.85 |
| Sample_T18C_k141_90472             | 19018  | 17  | 0  | 5   | Low-quality    | 49.79 |
| Sample_T7A_k141_76771              | 49371  | 89  | 11 | 0   | Low-quality    | 49.79 |
| Sample_C8C_k141_72314_fragment_2   | 18845  | 31  | 4  | 0   | Low-quality    | 49.76 |
| Sample_C8B_k141_38612              | 25310  | 14  | 0  | 11  | Low-quality    | 49.73 |
| Sample_C1A_k141_210819_fragment_2  | 18236  | 29  | 9  | 1   | Low-quality    | 49.73 |
| Sample_T8C_k141_88391              | 14640  | 17  | 9  | 0   | Low-quality    | 49.73 |
| Sample_C1A_k141_1122               | 30447  | 33  | 3  | 2   | Low-quality    | 49.7  |
| Sample_T17A_k141_2713              | 44020  | 32  | 0  | 9   | Low-quality    | 49.7  |

|                                    |       |     |    |    |             |       |
|------------------------------------|-------|-----|----|----|-------------|-------|
| Sample_C11A_k141_89314             | 14257 | 8   | 0  | 2  | Low-quality | 49.7  |
| Sample_C11A_k141_105778            | 30093 | 42  | 9  | 0  | Low-quality | 49.7  |
| Sample_C8B_k141_96704              | 22761 | 34  | 22 | 2  | Low-quality | 49.69 |
| Sample_T16B_k141_114686            | 22037 | 29  | 10 | 0  | Low-quality | 49.66 |
| Sample_T16B_k141_6288_fragment_1   | 21232 | 36  | 10 | 0  | Low-quality | 49.65 |
| Sample_T11C_k141_81245             | 64549 | 59  | 2  | 10 | Low-quality | 49.59 |
| Sample_T16B_k141_35521             | 18956 | 29  | 9  | 0  | Low-quality | 49.58 |
| Sample_C5C_k141_64645              | 42561 | 37  | 1  | 13 | Low-quality | 49.57 |
| Sample_T7A_k141_57170              | 82793 | 104 | 2  | 6  | Low-quality | 49.57 |
| Sample_C13C_k141_3038              | 20157 | 26  | 22 | 0  | Low-quality | 49.56 |
| Sample_C12C_k141_137156_fragment_1 | 22500 | 32  | 8  | 2  | Low-quality | 49.52 |
| Sample_T15B_k141_63437_fragment_1  | 42256 | 44  | 20 | 3  | Low-quality | 49.51 |
| Sample_C10C_k141_144279            | 6655  | 11  | 2  | 0  | Low-quality | 49.5  |
| Sample_C14C_k141_152686            | 64560 | 46  | 1  | 23 | Low-quality | 49.48 |
| Sample_C8B_k141_165164             | 20054 | 22  | 6  | 1  | Low-quality | 49.47 |
| Sample_C12A_k141_67165_fragment_1  | 20729 | 27  | 7  | 0  | Low-quality | 49.46 |
| Sample_T3A_k141_85155              | 23177 | 28  | 13 | 1  | Low-quality | 49.45 |
| Sample_C8C_k141_42328              | 31362 | 27  | 1  | 2  | Low-quality | 49.37 |
| Sample_T4C_k141_53040_fragment_1   | 20583 | 33  | 14 | 0  | Low-quality | 49.31 |
| Sample_T14B_k141_93219_fragment_1  | 9050  | 12  | 1  | 2  | Low-quality | 49.28 |
| Sample_C6A_k141_95850              | 71955 | 59  | 1  | 38 | Low-quality | 49.27 |
| Sample_C7C_k141_26807              | 16835 | 20  | 6  | 0  | Low-quality | 49.26 |
| Sample_C2B_k141_145826_fragment_2  | 67563 | 90  | 11 | 13 | Low-quality | 49.24 |
| Sample_C8A_k141_62293              | 24984 | 28  | 8  | 0  | Low-quality | 49.2  |
| Sample_T12A_k141_97928             | 10129 | 11  | 0  | 1  | Low-quality | 49.2  |
| Sample_T4B_k141_48805              | 16185 | 41  | 2  | 0  | Low-quality | 49.2  |
| Sample_T7B_k141_141747_fragment_1  | 46269 | 52  | 12 | 8  | Low-quality | 49.2  |
| Sample_C5A_k141_62363              | 71399 | 59  | 2  | 8  | Low-quality | 49.14 |
| Sample_T8C_k141_147686_fragment_4  | 16358 | 19  | 0  | 2  | Low-quality | 49.13 |
| Sample_T8B_k141_36300              | 72986 | 73  | 1  | 40 | Low-quality | 49.06 |
| Sample_C13C_k141_110405            | 15627 | 17  | 7  | 0  | Low-quality | 49.05 |
| Sample_C6C_k141_151551             | 26233 | 35  | 7  | 1  | Low-quality | 49.04 |
| Sample_T5C_k141_24191              | 17309 | 21  | 14 | 0  | Low-quality | 49.04 |
| Sample_T6A_k141_270967             | 34860 | 30  | 7  | 1  | Low-quality | 49.04 |
| Sample_T16A_k141_25269             | 20592 | 19  | 0  | 7  | Low-quality | 49    |
| Sample_T6B_k141_107824             | 14136 | 16  | 5  | 0  | Low-quality | 49    |
| Sample_C4A_k141_242001             | 36711 | 32  | 0  | 9  | Low-quality | 48.97 |
| Sample_T8A_k141_54326              | 28793 | 31  | 7  | 1  | Low-quality | 48.92 |
| Sample_T13A_k141_90771             | 5842  | 8   | 1  | 0  | Low-quality | 48.91 |

|                                  |       |     |    |    |             |       |
|----------------------------------|-------|-----|----|----|-------------|-------|
| Sample_C10C_k141_215216          | 28238 | 32  | 23 | 0  | Low-quality | 48.9  |
| Sample_T8C_k141_217448           | 70131 | 63  | 1  | 51 | Low-quality | 48.89 |
| Sample_C3A_k141_128703           | 24583 | 28  | 6  | 0  | Low-quality | 48.89 |
| Sample_T5B_k141_47440            | 32301 | 32  | 1  | 17 | Low-quality | 48.88 |
| Sample_C4C_k141_118200           | 23148 | 30  | 9  | 1  | Low-quality | 48.82 |
| Sample_T10B_k141_158399          | 16097 | 20  | 6  | 0  | Low-quality | 48.79 |
| Sample_C2B_k141_200821           | 19998 | 26  | 11 | 0  | Low-quality | 48.77 |
| Sample_T5A_k141_54773            | 27171 | 31  | 1  | 6  | Low-quality | 48.72 |
| Sample_T3B_k141_131112           | 16062 | 20  | 6  | 0  | Low-quality | 48.68 |
| Sample_C12A_k141_134075          | 6972  | 13  | 2  | 0  | Low-quality | 48.59 |
| Sample_T8B_k141_91729_fragment_2 | 52952 | 51  | 16 | 1  | Low-quality | 48.59 |
| Sample_C10A_k141_272784          | 38083 | 62  | 4  | 1  | Low-quality | 48.55 |
| Sample_T4B_k141_4606             | 21000 | 32  | 2  | 2  | Low-quality | 48.53 |
| Sample_T2A_k141_278004           | 38324 | 26  | 0  | 9  | Low-quality | 48.49 |
| Sample_T10A_k141_163153          | 18806 | 33  | 12 | 0  | Low-quality | 48.48 |
| Sample_C10A_k141_109985          | 22170 | 25  | 22 | 0  | Low-quality | 48.43 |
| Sample_T8B_k141_172925           | 21704 | 40  | 5  | 1  | Low-quality | 48.41 |
| Sample_T2B_k141_204627           | 14106 | 19  | 8  | 0  | Low-quality | 48.4  |
| Sample_C1A_k141_56233_fragment_1 | 18777 | 34  | 10 | 1  | Low-quality | 48.38 |
| Sample_T12C_k141_171378          | 35890 | 61  | 6  | 2  | Low-quality | 48.38 |
| Sample_C10C_k141_165559          | 29549 | 48  | 18 | 4  | Low-quality | 48.37 |
| Sample_C13C_k141_9081            | 23160 | 44  | 5  | 1  | Low-quality | 48.36 |
| Sample_T10A_k141_122527          | 22476 | 23  | 1  | 7  | Low-quality | 48.35 |
| Sample_T16C_k141_59620           | 30824 | 49  | 9  | 2  | Low-quality | 48.35 |
| Sample_T8B_k141_95802_fragment_1 | 21724 | 22  | 3  | 0  | Low-quality | 48.35 |
| Sample_T16B_k141_141014          | 45528 | 42  | 0  | 26 | Low-quality | 48.32 |
| Sample_C11A_k141_6903            | 20787 | 28  | 2  | 0  | Low-quality | 48.32 |
| Sample_T6A_k141_31047            | 36756 | 36  | 0  | 11 | Low-quality | 48.23 |
| Sample_C4A_k141_129796           | 16653 | 34  | 10 | 0  | Low-quality | 48.22 |
| Sample_T13B_k141_73642           | 23525 | 23  | 0  | 21 | Low-quality | 48.21 |
| Sample_C10A_k141_174165          | 18316 | 43  | 4  | 1  | Low-quality | 48.21 |
| Sample_T8C_k141_183150           | 27580 | 31  | 8  | 1  | Low-quality | 48.21 |
| Sample_C12B_k141_115942          | 15844 | 24  | 8  | 1  | Low-quality | 48.2  |
| Sample_C2A_k141_298705           | 98259 | 105 | 1  | 44 | Low-quality | 48.19 |
| Sample_T10A_k141_156587          | 20055 | 31  | 2  | 2  | Low-quality | 48.19 |
| Sample_T17C_k141_26367           | 34935 | 58  | 11 | 4  | Low-quality | 48.19 |
| Sample_T18B_k141_76007           | 50931 | 66  | 18 | 8  | Low-quality | 48.15 |
| Sample_C6C_k141_4022             | 22457 | 28  | 9  | 1  | Low-quality | 48.09 |
| Sample_T12A_k141_331341          | 20197 | 20  | 0  | 15 | Low-quality | 48.06 |

|                                    |        |     |    |    |             |       |
|------------------------------------|--------|-----|----|----|-------------|-------|
| Sample_T4B_k141_133806             | 118325 | 104 | 1  | 52 | Low-quality | 48.06 |
| Sample_T15B_k141_1924              | 16935  | 20  | 15 | 0  | Low-quality | 48.06 |
| Sample_T2B_k141_157437_fragment_1  | 6336   | 9   | 0  | 1  | Low-quality | 48.01 |
| Sample_T13C_k141_15397_fragment_1  | 43203  | 38  | 1  | 9  | Low-quality | 48    |
| Sample_T8A_k141_186548             | 20244  | 13  | 1  | 4  | Low-quality | 47.98 |
| Sample_C9B_k141_78673              | 22076  | 33  | 17 | 0  | Low-quality | 47.98 |
| Sample_C6C_k141_7511               | 19961  | 31  | 10 | 0  | Low-quality | 47.93 |
| Sample_T12C_k141_14922_fragment_1  | 30579  | 46  | 11 | 2  | Low-quality | 47.93 |
| Sample_C12B_k141_155377_fragment_2 | 69561  | 86  | 7  | 15 | Low-quality | 47.91 |
| Sample_T4B_k141_319340_fragment_1  | 17731  | 35  | 11 | 0  | Low-quality | 47.9  |
| Sample_T10C_k141_88456             | 16784  | 22  | 20 | 0  | Low-quality | 47.88 |
| Sample_T13B_k141_102866            | 83413  | 125 | 20 | 6  | Low-quality | 47.86 |
| Sample_C12C_k141_153536_fragment_2 | 18233  | 28  | 4  | 0  | Low-quality | 47.83 |
| Sample_T7A_k141_174766             | 28144  | 56  | 9  | 1  | Low-quality | 47.82 |
| Sample_T11C_k141_119364            | 7035   | 12  | 1  | 0  | Low-quality | 47.79 |
| Sample_T8A_k141_209147_fragment_1  | 28558  | 47  | 8  | 0  | Low-quality | 47.79 |
| Sample_C13A_k141_76836             | 28004  | 30  | 6  | 3  | Low-quality | 47.76 |
| Sample_C1B_k141_111283             | 37998  | 66  | 22 | 1  | Low-quality | 47.72 |
| Sample_C7C_k141_43843              | 16327  | 31  | 9  | 0  | Low-quality | 47.72 |
| Sample_T5B_k141_51397              | 81845  | 68  | 2  | 16 | Low-quality | 47.69 |
| Sample_T7C_k141_37948_fragment_1   | 18636  | 28  | 13 | 1  | Low-quality | 47.69 |
| Sample_C4B_k141_179835_fragment_1  | 19110  | 39  | 11 | 0  | Low-quality | 47.68 |
| Sample_T12C_k141_78449             | 44847  | 44  | 17 | 3  | Low-quality | 47.66 |
| Sample_T11C_k141_68142             | 16591  | 21  | 5  | 1  | Low-quality | 47.65 |
| Sample_C2B_k141_217231             | 15912  | 23  | 4  | 1  | Low-quality | 47.64 |
| Sample_C1C_k141_59097_fragment_1   | 8377   | 13  | 1  | 1  | Low-quality | 47.62 |
| Sample_C5B_k141_12056              | 17671  | 23  | 13 | 0  | Low-quality | 47.62 |
| Sample_T17A_k141_28511             | 14884  | 19  | 8  | 0  | Low-quality | 47.61 |
| Sample_T8C_k141_4521               | 36044  | 32  | 1  | 11 | Low-quality | 47.48 |
| Sample_C5B_k141_80111              | 17460  | 41  | 9  | 1  | Low-quality | 47.47 |
| Sample_T4B_k141_182382             | 15851  | 22  | 4  | 0  | Low-quality | 47.45 |
| Sample_T10A_k141_101326            | 16307  | 28  | 12 | 0  | Low-quality | 47.37 |
| Sample_C11C_k141_184028_fragment_2 | 43384  | 43  | 7  | 3  | Low-quality | 47.34 |
| Sample_T13A_k141_121109            | 81195  | 76  | 10 | 3  | Low-quality | 47.33 |
| Sample_T17C_k141_18934             | 24892  | 31  | 17 | 0  | Low-quality | 47.32 |
| Sample_C2B_k141_28309              | 145242 | 176 | 1  | 82 | Low-quality | 47.31 |
| Sample_T12C_k141_66820             | 23873  | 25  | 0  | 4  | Low-quality | 47.3  |
| Sample_T2C_k141_185506             | 13450  | 22  | 3  | 1  | Low-quality | 47.29 |
| Sample_T17B_k141_5073              | 24801  | 35  | 30 | 0  | Low-quality | 47.25 |

|                                   |        |     |    |     |             |       |
|-----------------------------------|--------|-----|----|-----|-------------|-------|
| Sample_C9A_k141_118084            | 22565  | 28  | 11 | 0   | Low-quality | 47.23 |
| Sample_C2C_k141_193919            | 73639  | 69  | 1  | 22  | Low-quality | 47.18 |
| Sample_T5B_k141_66179             | 8654   | 13  | 2  | 0   | Low-quality | 47.13 |
| Sample_T17C_k141_28140            | 293346 | 279 | 1  | 209 | Low-quality | 47.12 |
| Sample_T2C_k141_204294            | 15577  | 21  | 7  | 1   | Low-quality | 47.12 |
| Sample_C12C_k141_53332            | 39557  | 40  | 1  | 12  | Low-quality | 47.1  |
| Sample_C5C_k141_113550            | 33650  | 23  | 1  | 7   | Low-quality | 47.09 |
| Sample_T6A_k141_291360            | 19074  | 33  | 6  | 0   | Low-quality | 47.05 |
| Sample_C2A_k141_46414             | 84021  | 88  | 1  | 41  | Low-quality | 47.04 |
| Sample_T15B_k141_117079           | 20540  | 18  | 2  | 2   | Low-quality | 47.03 |
| Sample_T4B_k141_313698            | 131690 | 159 | 1  | 76  | Low-quality | 47.02 |
| Sample_T15C_k141_58470            | 73618  | 81  | 2  | 8   | Low-quality | 47.02 |
| Sample_C13B_k141_83931            | 145796 | 123 | 3  | 71  | Low-quality | 47    |
| Sample_C13C_k141_48401            | 21519  | 31  | 15 | 0   | Low-quality | 46.99 |
| Sample_C3A_k141_145813            | 35422  | 30  | 1  | 10  | Low-quality | 46.96 |
| Sample_T4B_k141_224651            | 24049  | 24  | 0  | 8   | Low-quality | 46.96 |
| Sample_T12A_k141_96873            | 87982  | 96  | 3  | 10  | Low-quality | 46.95 |
| Sample_T2A_k141_156053            | 116361 | 131 | 1  | 74  | Low-quality | 46.89 |
| Sample_T2B_k141_166314            | 21552  | 29  | 8  | 3   | Low-quality | 46.83 |
| Sample_T10B_k141_13315            | 19434  | 22  | 9  | 0   | Low-quality | 46.83 |
| Sample_C10B_k141_22829            | 18215  | 23  | 11 | 0   | Low-quality | 46.8  |
| Sample_T7A_k141_101206            | 34797  | 32  | 1  | 20  | Low-quality | 46.76 |
| Sample_C7B_k141_95249             | 87615  | 109 | 1  | 39  | Low-quality | 46.74 |
| Sample_C7B_k141_70692             | 41594  | 26  | 1  | 12  | Low-quality | 46.69 |
| Sample_T6C_k141_184943            | 17895  | 12  | 0  | 1   | Low-quality | 46.68 |
| Sample_C3C_k141_34484_fragment_1  | 18534  | 31  | 9  | 0   | Low-quality | 46.68 |
| Sample_C2B_k141_41157             | 60909  | 82  | 1  | 53  | Low-quality | 46.67 |
| Sample_C6A_k141_70705             | 42790  | 28  | 0  | 22  | Low-quality | 46.65 |
| Sample_T5B_k141_18743             | 76937  | 80  | 2  | 31  | Low-quality | 46.65 |
| Sample_C7A_k141_143286            | 19049  | 21  | 14 | 0   | Low-quality | 46.64 |
| Sample_T7A_k141_93041             | 17048  | 18  | 5  | 1   | Low-quality | 46.62 |
| Sample_T4C_k141_1751              | 18417  | 36  | 6  | 1   | Low-quality | 46.62 |
| Sample_T2A_k141_226062            | 37931  | 31  | 0  | 10  | Low-quality | 46.61 |
| Sample_T6B_k141_55086             | 34725  | 30  | 0  | 6   | Low-quality | 46.57 |
| Sample_T8B_k141_176780_fragment_1 | 24875  | 33  | 6  | 2   | Low-quality | 46.57 |
| Sample_T16B_k141_98100            | 16451  | 20  | 7  | 0   | Low-quality | 46.53 |
| Sample_T8B_k141_66698             | 35072  | 36  | 0  | 18  | Low-quality | 46.52 |
| Sample_C11B_k141_158739           | 19615  | 21  | 2  | 0   | Low-quality | 46.49 |
| Sample_C3A_k141_207314            | 26786  | 37  | 9  | 0   | Low-quality | 46.49 |

|                                    |        |     |    |    |             |       |
|------------------------------------|--------|-----|----|----|-------------|-------|
| Sample_T12B_k141_116145            | 24927  | 26  | 6  | 0  | Low-quality | 46.46 |
| Sample_T8C_k141_92770              | 16830  | 22  | 10 | 0  | Low-quality | 46.45 |
| Sample_C8C_k141_49517              | 16715  | 23  | 12 | 2  | Low-quality | 46.44 |
| Sample_T7B_k141_94325_fragment_1   | 17751  | 31  | 7  | 0  | Low-quality | 46.44 |
| Sample_T3A_k141_114668             | 19094  | 26  | 2  | 9  | Low-quality | 46.41 |
| Sample_C13A_k141_110368            | 16851  | 27  | 9  | 0  | Low-quality | 46.41 |
| Sample_T7C_k141_147364             | 38968  | 33  | 1  | 12 | Low-quality | 46.4  |
| Sample_T12B_k141_94171             | 28174  | 30  | 13 | 0  | Low-quality | 46.39 |
| Sample_C9A_k141_129948             | 15965  | 16  | 0  | 7  | Low-quality | 46.37 |
| Sample_T12B_k141_25296_fragment_1  | 16539  | 30  | 8  | 1  | Low-quality | 46.35 |
| Sample_T8B_k141_59749_fragment_1   | 20600  | 20  | 2  | 0  | Low-quality | 46.27 |
| Sample_T4B_k141_138653             | 19477  | 12  | 0  | 6  | Low-quality | 46.25 |
| Sample_T8A_k141_115066             | 48333  | 48  | 0  | 14 | Low-quality | 46.25 |
| Sample_C5A_k141_62265_fragment_1   | 24660  | 26  | 5  | 2  | Low-quality | 46.21 |
| Sample_C6B_k141_93582              | 32883  | 38  | 2  | 22 | Low-quality | 46.2  |
| Sample_T12A_k141_72850             | 8484   | 7   | 1  | 3  | Low-quality | 46.2  |
| Sample_T5C_k141_105820             | 23966  | 32  | 16 | 0  | Low-quality | 46.18 |
| Sample_T15B_k141_94611             | 17418  | 30  | 7  | 1  | Low-quality | 46.16 |
| Sample_T15B_k141_8116              | 35077  | 53  | 10 | 4  | Low-quality | 46.14 |
| Sample_C4A_k141_139383             | 25108  | 31  | 12 | 0  | Low-quality | 46.11 |
| Sample_T12B_k141_176900_fragment_1 | 62881  | 74  | 2  | 4  | Low-quality | 46.08 |
| Sample_T6B_k141_111078             | 35470  | 31  | 0  | 10 | Low-quality | 46.07 |
| Sample_T16B_k141_172628_fragment_1 | 28706  | 32  | 4  | 1  | Low-quality | 46.07 |
| Sample_T11C_k141_63062             | 21379  | 28  | 2  | 4  | Low-quality | 46.02 |
| Sample_C8C_k141_16396              | 17507  | 23  | 3  | 0  | Low-quality | 46.01 |
| Sample_T8B_k141_72041              | 13198  | 8   | 0  | 2  | Low-quality | 46    |
| Sample_C6B_k141_25814              | 21660  | 28  | 10 | 0  | Low-quality | 46    |
| Sample_C8C_k141_39763              | 18275  | 30  | 17 | 0  | Low-quality | 45.96 |
| Sample_C5A_k141_236732             | 113958 | 104 | 1  | 68 | Low-quality | 45.92 |
| Sample_T18C_k141_37826             | 17907  | 22  | 12 | 0  | Low-quality | 45.9  |
| Sample_C2B_k141_341308             | 113770 | 102 | 1  | 49 | Low-quality | 45.85 |
| Sample_C8A_k141_65444              | 36464  | 65  | 9  | 0  | Low-quality | 45.85 |
| Sample_C2B_k141_221176             | 73076  | 85  | 1  | 57 | Low-quality | 45.84 |
| Sample_C11B_k141_81943             | 16339  | 19  | 13 | 0  | Low-quality | 45.84 |
| Sample_T16C_k141_57146_fragment_1  | 17911  | 22  | 11 | 1  | Low-quality | 45.84 |
| Sample_T6B_k141_109451_fragment_2  | 24480  | 28  | 18 | 2  | Low-quality | 45.8  |
| Sample_C8A_k141_48160              | 25533  | 21  | 0  | 9  | Low-quality | 45.79 |
| Sample_C6B_k141_4114               | 16795  | 21  | 11 | 0  | Low-quality | 45.77 |
| Sample_T2A_k141_256856             | 26920  | 45  | 8  | 0  | Low-quality | 45.76 |



|                                    |        |     |    |    |             |       |
|------------------------------------|--------|-----|----|----|-------------|-------|
| Sample_C6B_k141_44859              | 21267  | 12  | 0  | 4  | Low-quality | 45.75 |
| Sample_C4A_k141_32357              | 15272  | 21  | 4  | 0  | Low-quality | 45.72 |
| Sample_C14A_k141_216323            | 18439  | 35  | 4  | 3  | Low-quality | 45.71 |
| Sample_T8B_k141_208833             | 21247  | 24  | 0  | 9  | Low-quality | 45.7  |
| Sample_T16B_k141_50481_fragment_1  | 15321  | 27  | 2  | 0  | Low-quality | 45.7  |
| Sample_T3B_k141_181868             | 15263  | 22  | 4  | 0  | Low-quality | 45.69 |
| Sample_C3A_k141_59156              | 20535  | 23  | 3  | 0  | Low-quality | 45.67 |
| Sample_C10B_k141_150894            | 30404  | 20  | 1  | 4  | Low-quality | 45.64 |
| Sample_C6C_k141_22781              | 15825  | 8   | 0  | 4  | Low-quality | 45.64 |
| Sample_T10A_k141_119291            | 17430  | 20  | 0  | 3  | Low-quality | 45.61 |
| Sample_C10A_k141_127748            | 13626  | 17  | 3  | 0  | Low-quality | 45.58 |
| Sample_T18B_k141_32704             | 55505  | 54  | 2  | 26 | Low-quality | 45.57 |
| Sample_C11C_k141_156554            | 26778  | 29  | 9  | 2  | Low-quality | 45.55 |
| Sample_T3A_k141_130803             | 18264  | 18  | 12 | 0  | Low-quality | 45.55 |
| Sample_T4B_k141_285578             | 16179  | 20  | 11 | 0  | Low-quality | 45.54 |
| Sample_T7A_k141_124777             | 25378  | 29  | 0  | 11 | Low-quality | 45.51 |
| Sample_T15B_k141_144849            | 13596  | 18  | 3  | 0  | Low-quality | 45.48 |
| Sample_T7B_k141_84770              | 35982  | 51  | 11 | 2  | Low-quality | 45.47 |
| Sample_T15C_k141_35225             | 113541 | 113 | 2  | 59 | Low-quality | 45.46 |
| Sample_T15A_k141_119623_fragment_3 | 81433  | 90  | 17 | 4  | Low-quality | 45.46 |
| Sample_T12B_k141_158983            | 24284  | 27  | 20 | 0  | Low-quality | 45.43 |
| Sample_T5C_k141_51095              | 18453  | 22  | 15 | 0  | Low-quality | 45.42 |
| Sample_C4B_k141_209159             | 8651   | 12  | 1  | 1  | Low-quality | 45.4  |
| Sample_C2B_k141_164917             | 18855  | 29  | 7  | 0  | Low-quality | 45.39 |
| Sample_T5B_k141_74936              | 22758  | 26  | 2  | 1  | Low-quality | 45.37 |
| Sample_C1C_k141_79005              | 83632  | 76  | 1  | 44 | Low-quality | 45.36 |
| Sample_C8A_k141_107199             | 35836  | 59  | 6  | 3  | Low-quality | 45.35 |
| Sample_C10A_k141_173287            | 12607  | 19  | 2  | 0  | Low-quality | 45.35 |
| Sample_T2A_k141_227610             | 22674  | 38  | 9  | 0  | Low-quality | 45.35 |
| Sample_T13B_k141_157070            | 17692  | 28  | 0  | 0  | Low-quality | 45.34 |
| Sample_C12C_k141_48058_fragment_1  | 7891   | 11  | 0  | 0  | Low-quality | 45.3  |
| Sample_T13B_k141_33721             | 69954  | 55  | 1  | 50 | Low-quality | 45.27 |
| Sample_T5A_k141_49012              | 19039  | 14  | 0  | 3  | Low-quality | 45.27 |
| Sample_C2A_k141_84756              | 20207  | 22  | 19 | 0  | Low-quality | 45.26 |
| Sample_T16C_k141_127643_fragment_2 | 80725  | 90  | 9  | 5  | Low-quality | 45.26 |
| Sample_T6C_k141_159023_fragment_1  | 36215  | 57  | 14 | 0  | Low-quality | 45.23 |
| Sample_T12C_k141_98745_fragment_1  | 32795  | 42  | 13 | 3  | Low-quality | 45.22 |
| Sample_T15C_k141_36628_fragment_1  | 36952  | 48  | 7  | 3  | Low-quality | 45.19 |
| Sample_T6B_k141_147105             | 27434  | 49  | 15 | 0  | Low-quality | 45.18 |

|                                   |        |     |    |    |             |       |
|-----------------------------------|--------|-----|----|----|-------------|-------|
| Sample_T2C_k141_195309            | 20361  | 26  | 7  | 1  | Low-quality | 45.13 |
| Sample_T14B_k141_146336           | 21706  | 26  | 13 | 1  | Low-quality | 45.11 |
| Sample_T7A_k141_116000            | 29068  | 37  | 9  | 2  | Low-quality | 45.1  |
| Sample_T16B_k141_161433           | 19551  | 34  | 9  | 1  | Low-quality | 45.09 |
| Sample_T6A_k141_249226            | 8332   | 6   | 2  | 0  | Low-quality | 45.09 |
| Sample_T5B_k141_6916              | 17027  | 19  | 4  | 0  | Low-quality | 45.07 |
| Sample_T5B_k141_36162_fragment_1  | 18049  | 20  | 14 | 0  | Low-quality | 45.06 |
| Sample_C4C_k141_244411            | 18906  | 18  | 0  | 10 | Low-quality | 44.99 |
| Sample_T15A_k141_57243            | 51404  | 54  | 21 | 12 | Low-quality | 44.98 |
| Sample_T5B_k141_18247             | 72521  | 64  | 2  | 32 | Low-quality | 44.97 |
| Sample_C8B_k141_43805             | 19918  | 36  | 8  | 1  | Low-quality | 44.97 |
| Sample_T10A_k141_48589_fragment_2 | 22583  | 26  | 13 | 1  | Low-quality | 44.96 |
| Sample_C11C_k141_141569           | 27762  | 44  | 9  | 1  | Low-quality | 44.95 |
| Sample_T7C_k141_73264             | 12890  | 17  | 2  | 1  | Low-quality | 44.93 |
| Sample_T18B_k141_75908            | 18828  | 26  | 12 | 0  | Low-quality | 44.9  |
| Sample_C7B_k141_67565             | 25159  | 46  | 5  | 0  | Low-quality | 44.87 |
| Sample_T8A_k141_63313             | 30514  | 37  | 0  | 6  | Low-quality | 44.86 |
| Sample_C9B_k141_72948             | 29150  | 55  | 5  | 0  | Low-quality | 44.86 |
| Sample_T17A_k141_22426_fragment_1 | 24641  | 40  | 23 | 1  | Low-quality | 44.86 |
| Sample_T8B_k141_259934            | 19285  | 12  | 3  | 0  | Low-quality | 44.85 |
| Sample_C11A_k141_1635             | 17419  | 18  | 0  | 5  | Low-quality | 44.82 |
| Sample_C10A_k141_284231           | 38030  | 33  | 0  | 23 | Low-quality | 44.77 |
| Sample_T10A_k141_84988            | 21669  | 36  | 4  | 3  | Low-quality | 44.77 |
| Sample_C11B_k141_56745            | 20955  | 18  | 4  | 1  | Low-quality | 44.75 |
| Sample_C1B_k141_187257            | 21660  | 21  | 4  | 1  | Low-quality | 44.75 |
| Sample_T17C_k141_29334            | 19275  | 25  | 3  | 0  | Low-quality | 44.74 |
| Sample_T16C_k141_122191           | 19381  | 30  | 11 | 1  | Low-quality | 44.73 |
| Sample_T5C_k141_64978             | 13335  | 18  | 4  | 0  | Low-quality | 44.72 |
| Sample_C2C_k141_114439            | 49500  | 46  | 1  | 28 | Low-quality | 44.7  |
| Sample_C9B_k141_48273             | 14988  | 30  | 0  | 0  | Low-quality | 44.69 |
| Sample_C10A_k141_292912           | 20671  | 22  | 5  | 0  | Low-quality | 44.67 |
| Sample_T8C_k141_130900_fragment_1 | 30468  | 33  | 12 | 4  | Low-quality | 44.67 |
| Sample_C10A_k141_265              | 15966  | 23  | 6  | 0  | Low-quality | 44.65 |
| Sample_T7B_k141_140566            | 17567  | 20  | 7  | 0  | Low-quality | 44.65 |
| Sample_T4B_k141_62907             | 18155  | 32  | 4  | 2  | Low-quality | 44.58 |
| Sample_C13A_k141_105681           | 138268 | 124 | 3  | 68 | Low-quality | 44.57 |
| Sample_T8C_k141_105931            | 17945  | 22  | 12 | 0  | Low-quality | 44.56 |
| Sample_T5C_k141_30278             | 19623  | 31  | 3  | 1  | Low-quality | 44.54 |
| Sample_C3B_k141_79547             | 16392  | 32  | 7  | 1  | Low-quality | 44.54 |

|                                    |        |     |    |     |             |       |
|------------------------------------|--------|-----|----|-----|-------------|-------|
| Sample_C12A_k141_50703             | 172317 | 158 | 1  | 107 | Low-quality | 44.53 |
| Sample_C8B_k141_163293_fragment_1  | 27376  | 54  | 12 | 3   | Low-quality | 44.48 |
| Sample_C13A_k141_40969             | 27466  | 49  | 10 | 0   | Low-quality | 44.4  |
| Sample_T4B_k141_278302             | 15719  | 19  | 13 | 0   | Low-quality | 44.37 |
| Sample_C11C_k141_7640_fragment_1   | 65370  | 98  | 16 | 4   | Low-quality | 44.36 |
| Sample_C3C_k141_20700              | 19646  | 13  | 0  | 2   | Low-quality | 44.35 |
| Sample_T2B_k141_11145              | 32997  | 27  | 1  | 15  | Low-quality | 44.29 |
| Sample_C4B_k141_262412             | 17778  | 20  | 7  | 0   | Low-quality | 44.29 |
| Sample_T14B_k141_89547             | 90264  | 80  | 1  | 31  | Low-quality | 44.27 |
| Sample_C1C_k141_127072             | 24673  | 21  | 0  | 4   | Low-quality | 44.24 |
| Sample_C2B_k141_170454             | 13216  | 16  | 3  | 1   | Low-quality | 44.21 |
| Sample_C5A_k141_274883             | 35676  | 31  | 0  | 23  | Low-quality | 44.2  |
| Sample_T11B_k141_153152_fragment_1 | 28018  | 41  | 13 | 4   | Low-quality | 44.19 |
| Sample_T12A_k141_324203            | 6881   | 7   | 0  | 0   | Low-quality | 44.18 |
| Sample_C2B_k141_216583             | 19444  | 10  | 1  | 4   | Low-quality | 44.16 |
| Sample_C9B_k141_36822_fragment_1   | 20666  | 23  | 4  | 3   | Low-quality | 44.16 |
| Sample_C4B_k141_139958             | 5793   | 8   | 0  | 2   | Low-quality | 44.13 |
| Sample_T10A_k141_168346_fragment_1 | 15317  | 23  | 15 | 0   | Low-quality | 44.12 |
| Sample_C11A_k141_101558            | 26497  | 43  | 11 | 0   | Low-quality | 44.11 |
| Sample_C6C_k141_185290             | 32945  | 19  | 1  | 6   | Low-quality | 44.08 |
| Sample_C6A_k141_51785              | 37964  | 54  | 6  | 0   | Low-quality | 44.08 |
| Sample_C7A_k141_102867             | 22202  | 30  | 6  | 2   | Low-quality | 44.08 |
| Sample_T10B_k141_63573             | 21238  | 28  | 15 | 0   | Low-quality | 44.08 |
| Sample_C11B_k141_117392            | 22051  | 25  | 19 | 1   | Low-quality | 44.05 |
| Sample_C3A_k141_1366               | 20717  | 25  | 16 | 0   | Low-quality | 44.05 |
| Sample_T17A_k141_9422              | 20633  | 29  | 12 | 1   | Low-quality | 44.05 |
| Sample_C7C_k141_74349_fragment_1   | 15847  | 25  | 13 | 0   | Low-quality | 44.04 |
| Sample_T4B_k141_222861             | 17047  | 14  | 4  | 0   | Low-quality | 44.04 |
| Sample_C8C_k141_167719             | 21346  | 40  | 6  | 2   | Low-quality | 44    |
| Sample_T11A_k141_41424             | 81082  | 77  | 1  | 9   | Low-quality | 43.98 |
| Sample_T11B_k141_54244             | 238242 | 226 | 1  | 172 | Low-quality | 43.98 |
| Sample_T5A_k141_6021               | 102084 | 126 | 2  | 7   | Low-quality | 43.96 |
| Sample_T11C_k141_9837              | 68722  | 78  | 2  | 7   | Low-quality | 43.92 |
| Sample_T6B_k141_27068_fragment_1   | 21729  | 32  | 5  | 0   | Low-quality | 43.89 |
| Sample_C1C_k141_24547              | 18639  | 34  | 9  | 1   | Low-quality | 43.88 |
| Sample_C4B_k141_87861              | 16105  | 27  | 3  | 3   | Low-quality | 43.88 |
| Sample_C8A_k141_150140             | 32799  | 26  | 1  | 12  | Low-quality | 43.85 |
| Sample_T12A_k141_309340            | 86379  | 80  | 1  | 55  | Low-quality | 43.85 |
| Sample_T15C_k141_1225              | 18002  | 33  | 6  | 1   | Low-quality | 43.85 |

|                                    |        |     |    |     |             |       |
|------------------------------------|--------|-----|----|-----|-------------|-------|
| Sample_T3A_k141_90623              | 31131  | 17  | 0  | 7   | Low-quality | 43.84 |
| Sample_C13A_k141_89256             | 18409  | 16  | 0  | 16  | Low-quality | 43.8  |
| Sample_T4B_k141_281745             | 19807  | 25  | 9  | 0   | Low-quality | 43.73 |
| Sample_T16B_k141_70342             | 19265  | 27  | 0  | 3   | Low-quality | 43.71 |
| Sample_C12A_k141_28397             | 16734  | 17  | 1  | 5   | Low-quality | 43.69 |
| Sample_C4C_k141_58973              | 35965  | 30  | 0  | 22  | Low-quality | 43.69 |
| Sample_T6B_k141_101500             | 88702  | 164 | 22 | 6   | Low-quality | 43.67 |
| Sample_T14C_k141_93824             | 469522 | 421 | 2  | 282 | Low-quality | 43.62 |
| Sample_T4B_k141_117096             | 26154  | 47  | 10 | 0   | Low-quality | 43.59 |
| Sample_C14A_k141_132972            | 17509  | 22  | 13 | 1   | Low-quality | 43.57 |
| Sample_T7A_k141_39079              | 32780  | 36  | 6  | 0   | Low-quality | 43.56 |
| Sample_C13C_k141_12478             | 26073  | 32  | 1  | 2   | Low-quality | 43.55 |
| Sample_C11C_k141_155095_fragment_1 | 64325  | 76  | 19 | 0   | Low-quality | 43.55 |
| Sample_T12A_k141_13497             | 28760  | 26  | 1  | 2   | Low-quality | 43.52 |
| Sample_T11C_k141_5366              | 235630 | 218 | 1  | 156 | Low-quality | 43.5  |
| Sample_T12A_k141_339899            | 26040  | 29  | 0  | 5   | Low-quality | 43.49 |
| Sample_T12A_k141_279871_fragment_2 | 16573  | 33  | 9  | 0   | Low-quality | 43.49 |
| Sample_T11A_k141_136002            | 15423  | 23  | 12 | 1   | Low-quality | 43.48 |
| Sample_T10A_k141_75290             | 20189  | 18  | 0  | 15  | Low-quality | 43.47 |
| Sample_C10C_k141_196360            | 17483  | 21  | 9  | 1   | Low-quality | 43.46 |
| Sample_C5C_k141_3022               | 26699  | 40  | 11 | 2   | Low-quality | 43.46 |
| Sample_T6A_k141_151134             | 20084  | 25  | 1  | 2   | Low-quality | 43.43 |
| Sample_C4C_k141_8186               | 20449  | 39  | 7  | 0   | Low-quality | 43.42 |
| Sample_T17C_k141_35585             | 43555  | 40  | 0  | 28  | Low-quality | 43.4  |
| Sample_T8A_k141_178365_fragment_1  | 20334  | 26  | 11 | 1   | Low-quality | 43.4  |
| Sample_C5B_k141_57613              | 144567 | 134 | 1  | 96  | Low-quality | 43.37 |
| Sample_C6C_k141_175038             | 64710  | 74  | 1  | 36  | Low-quality | 43.37 |
| Sample_T12C_k141_76012             | 16769  | 27  | 4  | 1   | Low-quality | 43.37 |
| Sample_T11A_k141_118599            | 20649  | 28  | 1  | 6   | Low-quality | 43.34 |
| Sample_C10A_k141_84286             | 6699   | 11  | 1  | 0   | Low-quality | 43.32 |
| Sample_T13B_k141_128565            | 27103  | 38  | 8  | 3   | Low-quality | 43.31 |
| Sample_C5A_k141_285182             | 57247  | 64  | 1  | 4   | Low-quality | 43.26 |
| Sample_C12A_k141_25636             | 42880  | 44  | 9  | 8   | Low-quality | 43.24 |
| Sample_T17A_k141_38345             | 42709  | 37  | 1  | 22  | Low-quality | 43.22 |
| Sample_T8B_k141_57790_fragment_1   | 21433  | 22  | 0  | 2   | Low-quality | 43.2  |
| Sample_T6B_k141_159898             | 76390  | 80  | 1  | 36  | Low-quality | 43.16 |
| Sample_T3B_k141_69648              | 19090  | 31  | 8  | 3   | Low-quality | 43.15 |
| Sample_T6C_k141_169285             | 18959  | 27  | 8  | 4   | Low-quality | 43.15 |
| Sample_C10A_k141_299103            | 17191  | 22  | 4  | 0   | Low-quality | 43.13 |

|                                   |        |     |    |     |             |       |
|-----------------------------------|--------|-----|----|-----|-------------|-------|
| Sample_C12A_k141_123806           | 37257  | 47  | 2  | 8   | Low-quality | 43.11 |
| Sample_T10B_k141_181069           | 17742  | 39  | 8  | 0   | Low-quality | 43.11 |
| Sample_T11A_k141_64901            | 18312  | 17  | 0  | 3   | Low-quality | 43.1  |
| Sample_T12A_k141_93760_fragment_2 | 19439  | 20  | 4  | 0   | Low-quality | 43.08 |
| Sample_C6B_k141_40434             | 17035  | 24  | 1  | 10  | Low-quality | 43.05 |
| Sample_C8B_k141_140600_fragment_2 | 20283  | 36  | 15 | 2   | Low-quality | 43.04 |
| Sample_C13C_k141_2378             | 13995  | 19  | 5  | 0   | Low-quality | 43.03 |
| Sample_C14C_k141_57880            | 15128  | 28  | 7  | 0   | Low-quality | 43.01 |
| Sample_C11B_k141_167994           | 22991  | 34  | 29 | 0   | Low-quality | 42.99 |
| Sample_C6B_k141_155198            | 9748   | 7   | 0  | 0   | Low-quality | 42.97 |
| Sample_T5B_k141_12010             | 17851  | 14  | 1  | 0   | Low-quality | 42.97 |
| Sample_C6A_k141_32766             | 44032  | 39  | 0  | 24  | Low-quality | 42.96 |
| Sample_T12A_k141_261811           | 80231  | 63  | 1  | 37  | Low-quality | 42.95 |
| Sample_T14C_k141_84507            | 36072  | 50  | 1  | 13  | Low-quality | 42.95 |
| Sample_T15C_k141_49271            | 17836  | 14  | 1  | 1   | Low-quality | 42.93 |
| Sample_C10C_k141_66331            | 20472  | 25  | 13 | 0   | Low-quality | 42.92 |
| Sample_C12A_k141_127175           | 7975   | 12  | 4  | 0   | Low-quality | 42.92 |
| Sample_T18C_k141_35663            | 25938  | 43  | 6  | 1   | Low-quality | 42.89 |
| Sample_T17C_k141_19655            | 511205 | 431 | 1  | 288 | Low-quality | 42.85 |
| Sample_C1C_k141_68676             | 27756  | 25  | 0  | 13  | Low-quality | 42.84 |
| Sample_T10A_k141_145907           | 16734  | 30  | 11 | 0   | Low-quality | 42.84 |
| Sample_T8C_k141_34938             | 6293   | 5   | 0  | 0   | Low-quality | 42.79 |
| Sample_C5A_k141_2405              | 23856  | 28  | 12 | 0   | Low-quality | 42.76 |
| Sample_T16B_k141_60503            | 82218  | 94  | 5  | 10  | Low-quality | 42.76 |
| Sample_T4B_k141_260357            | 13641  | 16  | 11 | 0   | Low-quality | 42.73 |
| Sample_C5A_k141_69929             | 42170  | 35  | 8  | 0   | Low-quality | 42.72 |
| Sample_T8C_k141_161354            | 5464   | 9   | 0  | 0   | Low-quality | 42.72 |
| Sample_T10A_k141_132346           | 18161  | 26  | 19 | 0   | Low-quality | 42.7  |
| Sample_C11C_k141_72457            | 14299  | 20  | 10 | 0   | Low-quality | 42.69 |
| Sample_C7A_k141_16991             | 17825  | 16  | 0  | 11  | Low-quality | 42.67 |
| Sample_T13C_k141_46547            | 17537  | 23  | 5  | 1   | Low-quality | 42.64 |
| Sample_T8B_k141_200612_fragment_1 | 18200  | 37  | 6  | 1   | Low-quality | 42.64 |
| Sample_T8C_k141_217572            | 16482  | 18  | 12 | 0   | Low-quality | 42.6  |
| Sample_C6A_k141_151424            | 78501  | 67  | 1  | 59  | Low-quality | 42.58 |
| Sample_T7C_k141_86800             | 20742  | 20  | 3  | 2   | Low-quality | 42.54 |
| Sample_C9B_k141_109885            | 67072  | 121 | 14 | 1   | Low-quality | 42.52 |
| Sample_T4B_k141_166366            | 78220  | 76  | 3  | 8   | Low-quality | 42.52 |
| Sample_C4B_k141_124826            | 72345  | 81  | 0  | 38  | Low-quality | 42.5  |
| Sample_T8B_k141_231132_fragment_1 | 22824  | 29  | 2  | 4   | Low-quality | 42.5  |

|                                   |       |    |    |    |             |       |
|-----------------------------------|-------|----|----|----|-------------|-------|
| Sample_T8C_k141_209516            | 25152 | 34 | 10 | 1  | Low-quality | 42.48 |
| Sample_C10A_k141_52568            | 27197 | 26 | 1  | 10 | Low-quality | 42.47 |
| Sample_T17C_k141_37651            | 19345 | 22 | 5  | 3  | Low-quality | 42.46 |
| Sample_T12C_k141_177286           | 29568 | 48 | 23 | 1  | Low-quality | 42.45 |
| Sample_C13B_k141_56229            | 33602 | 41 | 2  | 10 | Low-quality | 42.4  |
| Sample_T14B_k141_161899           | 16443 | 31 | 6  | 0  | Low-quality | 42.39 |
| Sample_T14B_k141_172598           | 15760 | 19 | 12 | 1  | Low-quality | 42.37 |
| Sample_C4B_k141_238453            | 23605 | 20 | 1  | 4  | Low-quality | 42.33 |
| Sample_T6C_k141_229919            | 17728 | 14 | 0  | 9  | Low-quality | 42.31 |
| Sample_C3A_k141_92113_fragment_1  | 32623 | 30 | 14 | 3  | Low-quality | 42.31 |
| Sample_T10A_k141_90864            | 16619 | 22 | 9  | 0  | Low-quality | 42.31 |
| Sample_T3A_k141_74155_fragment_1  | 17014 | 23 | 8  | 1  | Low-quality | 42.31 |
| Sample_C11C_k141_161297           | 16350 | 19 | 10 | 0  | Low-quality | 42.27 |
| Sample_C6B_k141_161734            | 20999 | 29 | 13 | 0  | Low-quality | 42.27 |
| Sample_C8C_k141_128118_fragment_2 | 29587 | 44 | 10 | 5  | Low-quality | 42.22 |
| Sample_C9A_k141_120073            | 17817 | 17 | 0  | 2  | Low-quality | 42.21 |
| Sample_C2C_k141_226962_fragment_1 | 29400 | 44 | 2  | 2  | Low-quality | 42.21 |
| Sample_T12C_k141_108451           | 18205 | 22 | 2  | 0  | Low-quality | 42.17 |
| Sample_T12C_k141_6645             | 63242 | 51 | 0  | 8  | Low-quality | 42.15 |
| Sample_T13B_k141_178641           | 14686 | 20 | 15 | 0  | Low-quality | 42.07 |
| Sample_C12A_k141_28786            | 13241 | 22 | 1  | 3  | Low-quality | 42.03 |
| Sample_C2B_k141_203415            | 18915 | 28 | 11 | 0  | Low-quality | 42.03 |
| Sample_T12B_k141_57806            | 48039 | 61 | 12 | 16 | Low-quality | 42.01 |
| Sample_T2A_k141_90098_fragment_1  | 26445 | 39 | 3  | 0  | Low-quality | 42.01 |
| Sample_T2A_k141_45038             | 16643 | 16 | 3  | 0  | Low-quality | 42.01 |
| Sample_T16B_k141_54825_fragment_1 | 25107 | 30 | 8  | 3  | Low-quality | 41.95 |
| Sample_T6C_k141_162184            | 17498 | 34 | 7  | 0  | Low-quality | 41.94 |
| Sample_C3A_k141_159319            | 17571 | 37 | 3  | 0  | Low-quality | 41.89 |
| Sample_C1B_k141_207201            | 5672  | 7  | 3  | 0  | Low-quality | 41.86 |
| Sample_C8B_k141_146024            | 29179 | 38 | 6  | 0  | Low-quality | 41.83 |
| Sample_C1B_k141_9025              | 32560 | 32 | 0  | 6  | Low-quality | 41.82 |
| Sample_C1B_k141_55826             | 23323 | 28 | 0  | 5  | Low-quality | 41.82 |
| Sample_T2C_k141_131364            | 35659 | 37 | 0  | 23 | Low-quality | 41.81 |
| Sample_C1C_k141_18500             | 14959 | 27 | 3  | 0  | Low-quality | 41.79 |
| Sample_T10A_k141_121448           | 37889 | 45 | 5  | 7  | Low-quality | 41.78 |
| Sample_T11A_k141_110159           | 25250 | 26 | 4  | 7  | Low-quality | 41.74 |
| Sample_T1A_k141_44351             | 40533 | 55 | 0  | 3  | Low-quality | 41.68 |
| Sample_C7B_k141_51192             | 30051 | 47 | 7  | 3  | Low-quality | 41.65 |
| Sample_T7A_k141_16839             | 14674 | 24 | 4  | 1  | Low-quality | 41.59 |

|                                    |        |     |    |    |             |       |
|------------------------------------|--------|-----|----|----|-------------|-------|
| Sample_T5C_k141_20545              | 32030  | 32  | 0  | 9  | Low-quality | 41.58 |
| Sample_C8B_k141_177275             | 24750  | 40  | 13 | 1  | Low-quality | 41.58 |
| Sample_T7B_k141_63656              | 18761  | 25  | 4  | 2  | Low-quality | 41.58 |
| Sample_C10C_k141_16600             | 21154  | 20  | 5  | 2  | Low-quality | 41.55 |
| Sample_C3C_k141_182787             | 122123 | 103 | 1  | 61 | Low-quality | 41.54 |
| Sample_T5B_k141_69051              | 61733  | 70  | 1  | 62 | Low-quality | 41.5  |
| Sample_C6B_k141_77233              | 13161  | 17  | 5  | 0  | Low-quality | 41.5  |
| Sample_T16C_k141_58777             | 24840  | 29  | 0  | 9  | Low-quality | 41.49 |
| Sample_C9B_k141_104160_fragment_1  | 26310  | 32  | 7  | 1  | Low-quality | 41.41 |
| Sample_C7A_k141_58258              | 27356  | 26  | 1  | 14 | Low-quality | 41.39 |
| Sample_C8A_k141_70335              | 35817  | 19  | 1  | 14 | Low-quality | 41.39 |
| Sample_C12A_k141_207263_fragment_1 | 19628  | 36  | 5  | 2  | Low-quality | 41.36 |
| Sample_C11A_k141_101479            | 24902  | 41  | 12 | 2  | Low-quality | 41.33 |
| Sample_T1B_k141_4612               | 15900  | 23  | 9  | 0  | Low-quality | 41.31 |
| Sample_T8A_k141_245560             | 17600  | 30  | 4  | 0  | Low-quality | 41.31 |
| Sample_C10A_k141_11764             | 41077  | 31  | 0  | 24 | Low-quality | 41.3  |
| Sample_C4C_k141_58556_fragment_1   | 25486  | 33  | 8  | 1  | Low-quality | 41.3  |
| Sample_T5C_k141_174034_fragment_1  | 45612  | 57  | 4  | 6  | Low-quality | 41.3  |
| Sample_T6B_k141_189886             | 7582   | 8   | 1  | 1  | Low-quality | 41.29 |
| Sample_C4A_k141_14958              | 19641  | 28  | 10 | 1  | Low-quality | 41.28 |
| Sample_C2A_k141_46515              | 77092  | 78  | 1  | 49 | Low-quality | 41.27 |
| Sample_C4C_k141_84112_fragment_1   | 19609  | 21  | 8  | 1  | Low-quality | 41.27 |
| Sample_T4C_k141_46440_fragment_1   | 19036  | 18  | 3  | 5  | Low-quality | 41.23 |
| Sample_T16A_k141_39375_fragment_1  | 18936  | 26  | 19 | 0  | Low-quality | 41.22 |
| Sample_T5C_k141_35148              | 15404  | 20  | 12 | 0  | Low-quality | 41.22 |
| Sample_C5C_k141_62940_fragment_1   | 17119  | 23  | 2  | 1  | Low-quality | 41.21 |
| Sample_T12A_k141_90032_fragment_1  | 24280  | 39  | 10 | 0  | Low-quality | 41.21 |
| Sample_C11B_k141_185401_fragment_1 | 62282  | 66  | 16 | 1  | Low-quality | 41.15 |
| Sample_C14C_k141_117766            | 17468  | 17  | 0  | 3  | Low-quality | 41.09 |
| Sample_C14A_k141_81163             | 21963  | 26  | 14 | 2  | Low-quality | 41.09 |
| Sample_C5A_k141_49403              | 16604  | 31  | 7  | 0  | Low-quality | 41.07 |
| Sample_T5B_k141_11880              | 15339  | 20  | 9  | 0  | Low-quality | 41.06 |
| Sample_C5C_k141_1606               | 11777  | 18  | 4  | 0  | Low-quality | 41.05 |
| Sample_C8C_k141_73937              | 22891  | 12  | 0  | 3  | Low-quality | 41.05 |
| Sample_C9C_k141_13236              | 22600  | 41  | 6  | 1  | Low-quality | 41    |
| Sample_T3A_k141_28910_fragment_1   | 16012  | 30  | 3  | 0  | Low-quality | 41    |
| Sample_T8C_k141_8893               | 50176  | 44  | 2  | 12 | Low-quality | 40.99 |
| Sample_T17B_k141_27085             | 24532  | 28  | 0  | 5  | Low-quality | 40.98 |
| Sample_C3C_k141_113664             | 51286  | 108 | 11 | 4  | Low-quality | 40.98 |

|                                   |        |     |    |     |             |       |
|-----------------------------------|--------|-----|----|-----|-------------|-------|
| Sample_T4B_k141_270839            | 7295   | 11  | 1  | 0   | Low-quality | 40.97 |
| Sample_T13B_k141_23240            | 15254  | 21  | 13 | 0   | Low-quality | 40.92 |
| Sample_T16A_k141_67157            | 73298  | 65  | 1  | 34  | Low-quality | 40.9  |
| Sample_T5C_k141_184276            | 80219  | 76  | 2  | 40  | Low-quality | 40.89 |
| Sample_C5A_k141_19970             | 18246  | 18  | 4  | 1   | Low-quality | 40.88 |
| Sample_C1C_k141_119215            | 25494  | 34  | 1  | 7   | Low-quality | 40.86 |
| Sample_C2B_k141_254784            | 16921  | 27  | 6  | 1   | Low-quality | 40.82 |
| Sample_C12A_k141_71387            | 73766  | 80  | 1  | 37  | Low-quality | 40.8  |
| Sample_T14B_k141_76656            | 114641 | 97  | 1  | 69  | Low-quality | 40.79 |
| Sample_C11A_k141_42917            | 14443  | 29  | 7  | 0   | Low-quality | 40.79 |
| Sample_C1C_k141_171377            | 31243  | 27  | 1  | 8   | Low-quality | 40.77 |
| Sample_T8C_k141_109137            | 15471  | 18  | 4  | 0   | Low-quality | 40.77 |
| Sample_C4C_k141_169393            | 19440  | 23  | 12 | 0   | Low-quality | 40.72 |
| Sample_T14A_k141_74680            | 22986  | 39  | 4  | 1   | Low-quality | 40.69 |
| Sample_T7A_k141_142381            | 15427  | 26  | 6  | 0   | Low-quality | 40.69 |
| Sample_T16C_k141_49676            | 37384  | 40  | 0  | 25  | Low-quality | 40.66 |
| Sample_T11B_k141_7697             | 30352  | 23  | 0  | 12  | Low-quality | 40.61 |
| Sample_C4B_k141_132069            | 100584 | 119 | 14 | 3   | Low-quality | 40.6  |
| Sample_C9B_k141_93982_fragment_1  | 18733  | 19  | 3  | 4   | Low-quality | 40.58 |
| Sample_T18C_k141_113790           | 22855  | 27  | 3  | 2   | Low-quality | 40.53 |
| Sample_T10A_k141_125493           | 13086  | 15  | 8  | 0   | Low-quality | 40.49 |
| Sample_T17B_k141_15196            | 5395   | 9   | 0  | 3   | Low-quality | 40.48 |
| Sample_T5C_k141_103238            | 33818  | 62  | 10 | 5   | Low-quality | 40.48 |
| Sample_C5A_k141_155885_fragment_2 | 24192  | 41  | 7  | 0   | Low-quality | 40.47 |
| Sample_T11B_k141_50849            | 17373  | 22  | 2  | 1   | Low-quality | 40.46 |
| Sample_C2C_k141_292382            | 55259  | 56  | 1  | 30  | Low-quality | 40.45 |
| Sample_C1A_k141_224061            | 56498  | 62  | 1  | 21  | Low-quality | 40.44 |
| Sample_T5A_k141_36494             | 15257  | 24  | 5  | 3   | Low-quality | 40.44 |
| Sample_T4C_k141_13891             | 18122  | 24  | 19 | 0   | Low-quality | 40.41 |
| Sample_T13B_k141_25208_fragment_2 | 24389  | 34  | 2  | 2   | Low-quality | 40.4  |
| Sample_C9A_k141_44286             | 33918  | 32  | 1  | 8   | Low-quality | 40.39 |
| Sample_T1B_k141_38960             | 221177 | 191 | 1  | 108 | Low-quality | 40.39 |
| Sample_C2A_k141_302428            | 16414  | 26  | 10 | 0   | Low-quality | 40.39 |
| Sample_C7B_k141_83985             | 65292  | 71  | 1  | 41  | Low-quality | 40.35 |
| Sample_T5B_k141_51358             | 24159  | 29  | 0  | 7   | Low-quality | 40.35 |
| Sample_C12C_k141_100858           | 18997  | 30  | 10 | 0   | Low-quality | 40.35 |
| Sample_T17B_k141_28945            | 29901  | 45  | 5  | 4   | Low-quality | 40.34 |
| Sample_T13C_k141_116685           | 142335 | 119 | 1  | 80  | Low-quality | 40.32 |
| Sample_C2A_k141_297886            | 7448   | 5   | 2  | 0   | Low-quality | 40.31 |



|                                    |        |     |    |    |             |       |
|------------------------------------|--------|-----|----|----|-------------|-------|
| Sample_C1C_k141_21600              | 64184  | 68  | 1  | 38 | Low-quality | 40.26 |
| Sample_C3A_k141_107847_fragment_2  | 25065  | 41  | 11 | 2  | Low-quality | 40.26 |
| Sample_C7B_k141_163882             | 101068 | 87  | 1  | 53 | Low-quality | 40.25 |
| Sample_T17B_k141_36244             | 25761  | 25  | 1  | 12 | Low-quality | 40.23 |
| Sample_C2B_k141_86031              | 12025  | 15  | 3  | 0  | Low-quality | 40.22 |
| Sample_C7A_k141_1379               | 31457  | 27  | 0  | 8  | Low-quality | 40.19 |
| Sample_T7A_k141_63739              | 14569  | 19  | 9  | 0  | Low-quality | 40.19 |
| Sample_C10B_k141_123161            | 22462  | 24  | 1  | 5  | Low-quality | 40.18 |
| Sample_T12C_k141_92800             | 34758  | 22  | 1  | 8  | Low-quality | 40.17 |
| Sample_T13A_k141_91767             | 18128  | 29  | 14 | 2  | Low-quality | 40.17 |
| Sample_T18B_k141_76529             | 21453  | 24  | 15 | 1  | Low-quality | 40.14 |
| Sample_C6A_k141_96622              | 15107  | 23  | 1  | 2  | Low-quality | 40.11 |
| Sample_T2C_k141_76715_fragment_1   | 28148  | 10  | 2  | 1  | Low-quality | 40.1  |
| Sample_T13B_k141_79049             | 19595  | 27  | 11 | 1  | Low-quality | 40.07 |
| Sample_C14B_k141_49498             | 75137  | 132 | 18 | 2  | Low-quality | 40.06 |
| Sample_T12C_k141_80999             | 23080  | 34  | 10 | 1  | Low-quality | 40.06 |
| Sample_C5A_k141_281655             | 67756  | 70  | 1  | 10 | Low-quality | 40.05 |
| Sample_C3A_k141_27120_fragment_1   | 16673  | 16  | 3  | 2  | Low-quality | 40.04 |
| Sample_C10A_k141_311857            | 99335  | 87  | 1  | 60 | Low-quality | 40.03 |
| Sample_T4B_k141_140795             | 70093  | 66  | 1  | 35 | Low-quality | 40.03 |
| Sample_T7C_k141_37388              | 35921  | 34  | 0  | 30 | Low-quality | 40.01 |
| Sample_T10A_k141_119156            | 14668  | 18  | 12 | 0  | Low-quality | 40.01 |
| Sample_C2B_k141_285309             | 15160  | 32  | 2  | 1  | Low-quality | 40    |
| Sample_T17B_k141_2651              | 16277  | 17  | 15 | 0  | Low-quality | 39.99 |
| Sample_T12A_k141_314063            | 11953  | 16  | 3  | 0  | Low-quality | 39.98 |
| Sample_C11B_k141_100987            | 15477  | 22  | 6  | 0  | Low-quality | 39.91 |
| Sample_C1C_k141_157185_fragment_1  | 18250  | 20  | 5  | 2  | Low-quality | 39.9  |
| Sample_C2C_k141_298055             | 25538  | 23  | 1  | 10 | Low-quality | 39.88 |
| Sample_C11B_k141_207305_fragment_1 | 26035  | 58  | 10 | 0  | Low-quality | 39.88 |
| Sample_T6C_k141_223552             | 21304  | 34  | 14 | 0  | Low-quality | 39.88 |
| Sample_C11B_k141_163125            | 6170   | 5   | 1  | 0  | Low-quality | 39.87 |
| Sample_C2A_k141_27840              | 22312  | 27  | 0  | 8  | Low-quality | 39.85 |
| Sample_C10A_k141_127626            | 14324  | 19  | 13 | 0  | Low-quality | 39.84 |
| Sample_T16C_k141_1247              | 23841  | 25  | 0  | 2  | Low-quality | 39.82 |
| Sample_C5A_k141_30164_fragment_1   | 15286  | 19  | 7  | 1  | Low-quality | 39.82 |
| Sample_C9B_k141_74651_fragment_1   | 60990  | 99  | 15 | 3  | Low-quality | 39.82 |
| Sample_T6A_k141_25427              | 13321  | 24  | 3  | 0  | Low-quality | 39.75 |
| Sample_C5A_k141_79821              | 14832  | 26  | 7  | 1  | Low-quality | 39.73 |
| Sample_C12B_k141_168337            | 14157  | 24  | 14 | 0  | Low-quality | 39.72 |

|                                   |       |     |    |    |             |       |
|-----------------------------------|-------|-----|----|----|-------------|-------|
| Sample_C2B_k141_63743             | 9212  | 11  | 5  | 0  | Low-quality | 39.71 |
| Sample_T13B_k141_89658            | 30406 | 20  | 0  | 9  | Low-quality | 39.69 |
| Sample_T17B_k141_29005            | 23274 | 38  | 10 | 1  | Low-quality | 39.69 |
| Sample_C3A_k141_199751            | 18670 | 21  | 1  | 0  | Low-quality | 39.66 |
| Sample_T7A_k141_155640            | 17677 | 13  | 0  | 2  | Low-quality | 39.66 |
| Sample_T13C_k141_101243           | 21849 | 39  | 6  | 0  | Low-quality | 39.64 |
| Sample_C2A_k141_67414             | 37011 | 58  | 2  | 7  | Low-quality | 39.62 |
| Sample_T17B_k141_6064             | 18568 | 32  | 20 | 2  | Low-quality | 39.61 |
| Sample_T4B_k141_95140             | 43122 | 55  | 5  | 1  | Low-quality | 39.61 |
| Sample_C1C_k141_104536            | 98260 | 97  | 1  | 64 | Low-quality | 39.6  |
| Sample_C1A_k141_3399              | 22654 | 30  | 3  | 2  | Low-quality | 39.59 |
| Sample_T6B_k141_49493             | 68405 | 102 | 14 | 0  | Low-quality | 39.59 |
| Sample_T17A_k141_38992            | 18960 | 28  | 19 | 1  | Low-quality | 39.56 |
| Sample_T16B_k141_96863            | 72886 | 68  | 1  | 47 | Low-quality | 39.53 |
| Sample_C1B_k141_22617             | 16801 | 20  | 1  | 5  | Low-quality | 39.52 |
| Sample_C12A_k141_212964           | 15634 | 20  | 1  | 6  | Low-quality | 39.51 |
| Sample_C4A_k141_135705            | 14458 | 21  | 7  | 1  | Low-quality | 39.51 |
| Sample_T16B_k141_74463            | 20601 | 23  | 8  | 3  | Low-quality | 39.51 |
| Sample_T7B_k141_125838_fragment_1 | 20071 | 21  | 0  | 3  | Low-quality | 39.48 |
| Sample_C9A_k141_18192             | 30933 | 29  | 0  | 8  | Low-quality | 39.47 |
| Sample_C7B_k141_59074             | 66962 | 58  | 1  | 34 | Low-quality | 39.46 |
| Sample_C4C_k141_241985            | 5787  | 13  | 1  | 0  | Low-quality | 39.46 |
| Sample_C12A_k141_121688           | 27065 | 31  | 1  | 6  | Low-quality | 39.44 |
| Sample_C8C_k141_173625_fragment_1 | 16102 | 21  | 10 | 0  | Low-quality | 39.39 |
| Sample_T1A_k141_11838             | 16522 | 21  | 11 | 0  | Low-quality | 39.37 |
| Sample_C3A_k141_238000            | 18190 | 23  | 8  | 0  | Low-quality | 39.35 |
| Sample_T10A_k141_7247             | 6124  | 6   | 1  | 4  | Low-quality | 39.34 |
| Sample_C10C_k141_210729           | 77625 | 69  | 1  | 53 | Low-quality | 39.3  |
| Sample_T11C_k141_96540            | 15401 | 11  | 3  | 0  | Low-quality | 39.3  |
| Sample_C8B_k141_133461            | 25161 | 27  | 1  | 16 | Low-quality | 39.29 |
| Sample_C12C_k141_102267           | 99672 | 99  | 1  | 80 | Low-quality | 39.27 |
| Sample_C13A_k141_48933            | 18854 | 31  | 7  | 0  | Low-quality | 39.27 |
| Sample_C9A_k141_133896_fragment_1 | 19007 | 37  | 9  | 3  | Low-quality | 39.27 |
| Sample_C14C_k141_58621            | 95283 | 91  | 2  | 14 | Low-quality | 39.26 |
| Sample_T17B_k141_7569             | 15618 | 19  | 11 | 0  | Low-quality | 39.21 |
| Sample_C4C_k141_19285             | 21096 | 35  | 5  | 1  | Low-quality | 39.19 |
| Sample_C9C_k141_48061             | 11994 | 12  | 2  | 0  | Low-quality | 39.18 |
| Sample_C6A_k141_214012            | 15160 | 26  | 13 | 0  | Low-quality | 39.17 |
| Sample_C9C_k141_78780             | 11991 | 14  | 2  | 0  | Low-quality | 39.17 |

|                                    |        |     |    |    |             |       |
|------------------------------------|--------|-----|----|----|-------------|-------|
| Sample_T11C_k141_54873             | 19725  | 31  | 9  | 2  | Low-quality | 39.17 |
| Sample_T4C_k141_76886              | 23584  | 38  | 19 | 2  | Low-quality | 39.16 |
| Sample_T13B_k141_119060            | 13017  | 11  | 0  | 9  | Low-quality | 39.15 |
| Sample_T16B_k141_31947             | 56644  | 51  | 1  | 34 | Low-quality | 39.15 |
| Sample_T5A_k141_8686               | 43622  | 40  | 3  | 6  | Low-quality | 39.15 |
| Sample_T11B_k141_89771             | 15787  | 31  | 4  | 0  | Low-quality | 39.14 |
| Sample_T3A_k141_125816_fragment_1  | 23856  | 50  | 8  | 1  | Low-quality | 39.13 |
| Sample_C2B_k141_38748              | 35282  | 63  | 7  | 1  | Low-quality | 39.12 |
| Sample_C13C_k141_27009_fragment_1  | 15160  | 26  | 3  | 0  | Low-quality | 39.11 |
| Sample_T11B_k141_91478             | 21105  | 23  | 15 | 1  | Low-quality | 39.11 |
| Sample_T12B_k141_174249            | 10399  | 20  | 1  | 1  | Low-quality | 39.1  |
| Sample_T12C_k141_142527_fragment_1 | 21551  | 34  | 6  | 0  | Low-quality | 39.1  |
| Sample_C10C_k141_65761             | 102394 | 93  | 1  | 54 | Low-quality | 39.07 |
| Sample_C8B_k141_166967             | 30872  | 40  | 12 | 0  | Low-quality | 39.07 |
| Sample_T7A_k141_15157              | 11680  | 12  | 3  | 0  | Low-quality | 39.07 |
| Sample_C10C_k141_225722            | 15788  | 21  | 14 | 0  | Low-quality | 39.06 |
| Sample_T17A_k141_54478             | 17688  | 23  | 9  | 0  | Low-quality | 39.06 |
| Sample_T4B_k141_347516             | 16268  | 17  | 3  | 0  | Low-quality | 39.06 |
| Sample_T18C_k141_53344_fragment_1  | 28561  | 34  | 6  | 3  | Low-quality | 39.05 |
| Sample_T3C_k141_10268              | 5201   | 8   | 0  | 1  | Low-quality | 39.03 |
| Sample_T8B_k141_152901_fragment_3  | 17547  | 26  | 0  | 1  | Low-quality | 39.02 |
| Sample_T10B_k141_133956            | 23233  | 26  | 0  | 5  | Low-quality | 39.01 |
| Sample_T11A_k141_20877             | 14139  | 20  | 6  | 0  | Low-quality | 38.95 |
| Sample_C13A_k141_78598             | 16303  | 19  | 9  | 0  | Low-quality | 38.94 |
| Sample_C1C_k141_32951              | 18404  | 22  | 12 | 1  | Low-quality | 38.94 |
| Sample_T2A_k141_6783               | 55537  | 56  | 2  | 6  | Low-quality | 38.9  |
| Sample_C2A_k141_130825             | 21268  | 28  | 0  | 7  | Low-quality | 38.89 |
| Sample_C7B_k141_183222             | 25774  | 29  | 8  | 6  | Low-quality | 38.87 |
| Sample_C3A_k141_245477             | 16333  | 15  | 1  | 6  | Low-quality | 38.86 |
| Sample_C4C_k141_41871              | 5723   | 9   | 2  | 0  | Low-quality | 38.86 |
| Sample_T6B_k141_147015             | 39417  | 76  | 6  | 0  | Low-quality | 38.86 |
| Sample_T10C_k141_18783             | 90210  | 74  | 1  | 41 | Low-quality | 38.84 |
| Sample_C10A_k141_224163            | 69560  | 83  | 1  | 28 | Low-quality | 38.82 |
| Sample_T7C_k141_12882              | 23179  | 27  | 9  | 3  | Low-quality | 38.8  |
| Sample_C5B_k141_19427              | 25622  | 23  | 1  | 7  | Low-quality | 38.77 |
| Sample_T14A_k141_80926             | 131638 | 127 | 1  | 92 | Low-quality | 38.77 |
| Sample_C12C_k141_65494             | 19023  | 19  | 8  | 2  | Low-quality | 38.76 |
| Sample_C6C_k141_172633             | 14240  | 17  | 11 | 0  | Low-quality | 38.75 |
| Sample_C14C_k141_100359            | 24315  | 33  | 4  | 1  | Low-quality | 38.73 |

|                                    |        |    |    |    |             |       |
|------------------------------------|--------|----|----|----|-------------|-------|
| Sample_C7A_k141_135020             | 15195  | 26 | 5  | 0  | Low-quality | 38.73 |
| Sample_C7B_k141_158280             | 16104  | 19 | 2  | 3  | Low-quality | 38.72 |
| Sample_T3A_k141_14206              | 24971  | 29 | 12 | 2  | Low-quality | 38.72 |
| Sample_C3C_k141_223344             | 54905  | 52 | 8  | 24 | Low-quality | 38.69 |
| Sample_C11B_k141_58422             | 15829  | 19 | 13 | 0  | Low-quality | 38.69 |
| Sample_T7B_k141_60904              | 21387  | 40 | 9  | 0  | Low-quality | 38.69 |
| Sample_T8B_k141_15070_fragment_1   | 35486  | 39 | 2  | 4  | Low-quality | 38.66 |
| Sample_T17C_k141_11205             | 5149   | 6  | 0  | 2  | Low-quality | 38.64 |
| Sample_C13B_k141_86774             | 17716  | 23 | 1  | 0  | Low-quality | 38.64 |
| Sample_C5A_k141_52756              | 24324  | 24 | 5  | 1  | Low-quality | 38.6  |
| Sample_T2B_k141_259335             | 25097  | 34 | 6  | 1  | Low-quality | 38.6  |
| Sample_T5A_k141_35551              | 31187  | 20 | 0  | 9  | Low-quality | 38.59 |
| Sample_C11C_k141_57605             | 23907  | 25 | 10 | 2  | Low-quality | 38.58 |
| Sample_C4B_k141_250763             | 15976  | 12 | 7  | 1  | Low-quality | 38.57 |
| Sample_T14A_k141_58586             | 16059  | 17 | 1  | 3  | Low-quality | 38.57 |
| Sample_T15A_k141_232               | 16477  | 14 | 4  | 1  | Low-quality | 38.54 |
| Sample_C2A_k141_70795              | 17893  | 17 | 0  | 15 | Low-quality | 38.52 |
| Sample_T15A_k141_160025_fragment_1 | 69037  | 80 | 17 | 1  | Low-quality | 38.52 |
| Sample_C9B_k141_57351              | 17406  | 22 | 20 | 0  | Low-quality | 38.5  |
| Sample_T8B_k141_166032             | 16577  | 36 | 3  | 0  | Low-quality | 38.5  |
| Sample_T4B_k141_329100             | 75557  | 68 | 2  | 28 | Low-quality | 38.49 |
| Sample_T5A_k141_13501              | 28347  | 28 | 7  | 0  | Low-quality | 38.49 |
| Sample_C9B_k141_95611              | 29496  | 19 | 0  | 8  | Low-quality | 38.44 |
| Sample_T14A_k141_114509            | 17265  | 33 | 12 | 0  | Low-quality | 38.43 |
| Sample_C6A_k141_89245_fragment_1   | 15698  | 22 | 10 | 0  | Low-quality | 38.42 |
| Sample_T10A_k141_171667            | 29167  | 23 | 0  | 6  | Low-quality | 38.39 |
| Sample_C3C_k141_156543             | 100214 | 78 | 1  | 53 | Low-quality | 38.38 |
| Sample_T14B_k141_23012_fragment_1  | 15174  | 26 | 7  | 0  | Low-quality | 38.37 |
| Sample_T8A_k141_188691             | 17817  | 15 | 0  | 12 | Low-quality | 38.36 |
| Sample_T14A_k141_213792            | 68755  | 44 | 3  | 17 | Low-quality | 38.33 |
| Sample_T16B_k141_112451            | 8682   | 9  | 0  | 2  | Low-quality | 38.28 |
| Sample_C14A_k141_39791_fragment_1  | 14913  | 25 | 8  | 1  | Low-quality | 38.27 |
| Sample_C3A_k141_129322             | 22292  | 17 | 1  | 6  | Low-quality | 38.26 |
| Sample_C5A_k141_277503             | 19337  | 22 | 1  | 6  | Low-quality | 38.22 |
| Sample_T14B_k141_668               | 21292  | 21 | 0  | 6  | Low-quality | 38.18 |
| Sample_T3A_k141_100259             | 5477   | 10 | 1  | 0  | Low-quality | 38.18 |
| Sample_T2A_k141_49665              | 18033  | 19 | 5  | 0  | Low-quality | 38.18 |
| Sample_T4C_k141_76093              | 22020  | 38 | 6  | 0  | Low-quality | 38.17 |
| Sample_C9C_k141_23896              | 17272  | 37 | 5  | 1  | Low-quality | 38.16 |

|                                    |       |     |    |    |             |       |
|------------------------------------|-------|-----|----|----|-------------|-------|
| Sample_C10B_k141_104876            | 55679 | 50  | 1  | 26 | Low-quality | 38.13 |
| Sample_C3B_k141_5702               | 36524 | 36  | 0  | 19 | Low-quality | 38.12 |
| Sample_C8A_k141_79727              | 23335 | 32  | 3  | 0  | Low-quality | 38.11 |
| Sample_C3A_k141_231792             | 22446 | 22  | 14 | 0  | Low-quality | 38.1  |
| Sample_C3A_k141_198825             | 17112 | 25  | 1  | 1  | Low-quality | 38.09 |
| Sample_T14A_k141_239085            | 30022 | 29  | 1  | 13 | Low-quality | 38.04 |
| Sample_C13C_k141_31418             | 13840 | 16  | 11 | 0  | Low-quality | 38.04 |
| Sample_T8B_k141_114763             | 41706 | 40  | 0  | 25 | Low-quality | 38.03 |
| Sample_T13C_k141_79182             | 17670 | 16  | 0  | 3  | Low-quality | 38.01 |
| Sample_T4B_k141_43377              | 58687 | 59  | 1  | 33 | Low-quality | 37.98 |
| Sample_C2A_k141_100539             | 52700 | 51  | 1  | 32 | Low-quality | 37.97 |
| Sample_T11A_k141_52710             | 66847 | 50  | 1  | 36 | Low-quality | 37.95 |
| Sample_T8B_k141_223878             | 12944 | 20  | 14 | 0  | Low-quality | 37.95 |
| Sample_T8A_k141_6547               | 13867 | 24  | 2  | 0  | Low-quality | 37.94 |
| Sample_T13B_k141_44333             | 16981 | 19  | 0  | 15 | Low-quality | 37.93 |
| Sample_T5C_k141_119649_fragment_1  | 20364 | 29  | 3  | 2  | Low-quality | 37.91 |
| Sample_C12A_k141_22370             | 25047 | 47  | 4  | 0  | Low-quality | 37.9  |
| Sample_C12B_k141_71046             | 15470 | 21  | 1  | 1  | Low-quality | 37.89 |
| Sample_T18A_k141_121200            | 29195 | 30  | 14 | 4  | Low-quality | 37.88 |
| Sample_C6B_k141_169961             | 15414 | 23  | 6  | 0  | Low-quality | 37.85 |
| Sample_C14C_k141_28691             | 26897 | 30  | 1  | 6  | Low-quality | 37.84 |
| Sample_C12A_k141_70750             | 7796  | 10  | 0  | 0  | Low-quality | 37.84 |
| Sample_T3B_k141_154496             | 16010 | 17  | 1  | 0  | Low-quality | 37.82 |
| Sample_C3A_k141_154747             | 21081 | 21  | 0  | 7  | Low-quality | 37.8  |
| Sample_C12C_k141_79923             | 25506 | 18  | 1  | 2  | Low-quality | 37.77 |
| Sample_T4B_k141_41258              | 91732 | 102 | 1  | 42 | Low-quality | 37.76 |
| Sample_C6C_k141_77426              | 56335 | 56  | 1  | 35 | Low-quality | 37.75 |
| Sample_T11B_k141_158050            | 16894 | 26  | 8  | 0  | Low-quality | 37.75 |
| Sample_T14A_k141_220140_fragment_1 | 10809 | 8   | 0  | 1  | Low-quality | 37.74 |
| Sample_C7C_k141_51978_fragment_2   | 13822 | 27  | 5  | 0  | Low-quality | 37.73 |
| Sample_C13A_k141_24723             | 21273 | 23  | 0  | 4  | Low-quality | 37.71 |
| Sample_C7C_k141_87988              | 21879 | 34  | 7  | 2  | Low-quality | 37.69 |
| Sample_T10A_k141_169638            | 15275 | 20  | 3  | 0  | Low-quality | 37.66 |
| Sample_T8A_k141_189627             | 26254 | 18  | 1  | 4  | Low-quality | 37.64 |
| Sample_T11B_k141_91096             | 14506 | 11  | 4  | 0  | Low-quality | 37.62 |
| Sample_C14A_k141_145613            | 22480 | 26  | 1  | 5  | Low-quality | 37.55 |
| Sample_T7C_k141_120879             | 20576 | 27  | 11 | 0  | Low-quality | 37.55 |
| Sample_C10A_k141_23230             | 8857  | 10  | 5  | 0  | Low-quality | 37.54 |
| Sample_T12A_k141_104575            | 26138 | 22  | 1  | 14 | Low-quality | 37.53 |

|                                   |        |     |    |    |             |       |
|-----------------------------------|--------|-----|----|----|-------------|-------|
| Sample_C8B_k141_102779_fragment_1 | 16718  | 23  | 5  | 0  | Low-quality | 37.53 |
| Sample_C4A_k141_106712            | 17441  | 16  | 0  | 2  | Low-quality | 37.52 |
| Sample_T10A_k141_43049            | 14648  | 24  | 12 | 0  | Low-quality | 37.52 |
| Sample_C10A_k141_312059           | 15763  | 19  | 0  | 11 | Low-quality | 37.51 |
| Sample_C12C_k141_206540           | 18033  | 20  | 9  | 0  | Low-quality | 37.51 |
| Sample_T12B_k141_23739            | 16898  | 31  | 1  | 1  | Low-quality | 37.51 |
| Sample_C12B_k141_29784            | 16033  | 13  | 2  | 0  | Low-quality | 37.49 |
| Sample_T18B_k141_70727            | 14386  | 18  | 2  | 1  | Low-quality | 37.48 |
| Sample_T15A_k141_81920            | 18016  | 28  | 2  | 1  | Low-quality | 37.48 |
| Sample_T11A_k141_80869            | 17863  | 30  | 9  | 0  | Low-quality | 37.47 |
| Sample_T4B_k141_170430            | 14059  | 23  | 8  | 0  | Low-quality | 37.46 |
| Sample_T13B_k141_24811            | 14981  | 23  | 12 | 0  | Low-quality | 37.44 |
| Sample_T11A_k141_88598            | 167752 | 153 | 4  | 67 | Low-quality | 37.42 |
| Sample_C3C_k141_174511            | 14887  | 23  | 7  | 0  | Low-quality | 37.41 |
| Sample_C6A_k141_118356            | 30808  | 20  | 0  | 19 | Low-quality | 37.4  |
| Sample_T10C_k141_52211            | 33000  | 68  | 6  | 1  | Low-quality | 37.4  |
| Sample_T13A_k141_75458            | 17514  | 21  | 8  | 0  | Low-quality | 37.4  |
| Sample_C5B_k141_62212_fragment_1  | 30747  | 31  | 0  | 4  | Low-quality | 37.37 |
| Sample_T6B_k141_78001             | 17318  | 24  | 4  | 0  | Low-quality | 37.37 |
| Sample_C4C_k141_7083              | 24319  | 17  | 3  | 0  | Low-quality | 37.32 |
| Sample_T17A_k141_17686            | 31336  | 33  | 1  | 10 | Low-quality | 37.31 |
| Sample_T1B_k141_2548              | 33573  | 29  | 0  | 15 | Low-quality | 37.3  |
| Sample_C11B_k141_55172            | 18649  | 20  | 1  | 2  | Low-quality | 37.3  |
| Sample_T4A_k141_31341             | 52614  | 46  | 2  | 26 | Low-quality | 37.27 |
| Sample_T11C_k141_78665            | 92445  | 87  | 1  | 56 | Low-quality | 37.26 |
| Sample_C3B_k141_21803             | 29799  | 37  | 7  | 1  | Low-quality | 37.25 |
| Sample_T13C_k141_110612           | 24609  | 31  | 1  | 8  | Low-quality | 37.24 |
| Sample_T17B_k141_20784            | 17443  | 23  | 17 | 0  | Low-quality | 37.2  |
| Sample_C8A_k141_178716            | 20722  | 19  | 1  | 6  | Low-quality | 37.16 |
| Sample_T17B_k141_25130            | 14735  | 14  | 10 | 0  | Low-quality | 37.15 |
| Sample_T4C_k141_11543             | 65538  | 82  | 2  | 5  | Low-quality | 37.15 |
| Sample_C1C_k141_137734            | 16412  | 22  | 14 | 0  | Low-quality | 37.14 |
| Sample_C3C_k141_90221             | 30981  | 33  | 2  | 2  | Low-quality | 37.14 |
| Sample_C2A_k141_8693              | 23270  | 20  | 1  | 3  | Low-quality | 37.11 |
| Sample_C9A_k141_71559_fragment_1  | 7609   | 8   | 1  | 1  | Low-quality | 37.1  |
| Sample_T16C_k141_113802           | 19059  | 25  | 3  | 1  | Low-quality | 37.1  |
| Sample_C2B_k141_5927              | 21300  | 25  | 1  | 6  | Low-quality | 37.08 |
| Sample_C10A_k141_68286            | 13331  | 19  | 4  | 3  | Low-quality | 37.07 |
| Sample_C8B_k141_53286             | 14244  | 22  | 4  | 0  | Low-quality | 37.06 |

|                                   |       |    |    |    |             |       |
|-----------------------------------|-------|----|----|----|-------------|-------|
| Sample_C3B_k141_139744            | 68232 | 62 | 1  | 36 | Low-quality | 37.03 |
| Sample_T18A_k141_107052           | 41643 | 42 | 1  | 9  | Low-quality | 36.97 |
| Sample_T6C_k141_57839             | 15540 | 14 | 0  | 3  | Low-quality | 36.97 |
| Sample_C4B_k141_85784             | 15275 | 15 | 4  | 1  | Low-quality | 36.97 |
| Sample_C7B_k141_124045            | 13578 | 21 | 9  | 0  | Low-quality | 36.95 |
| Sample_T1C_k141_49518             | 11768 | 14 | 7  | 0  | Low-quality | 36.94 |
| Sample_T6A_k141_174002            | 18267 | 18 | 5  | 0  | Low-quality | 36.91 |
| Sample_C1C_k141_25422_fragment_1  | 13814 | 27 | 4  | 1  | Low-quality | 36.9  |
| Sample_T8B_k141_52237             | 20538 | 27 | 0  | 16 | Low-quality | 36.89 |
| Sample_C6C_k141_74644             | 24083 | 37 | 4  | 1  | Low-quality | 36.88 |
| Sample_C8B_k141_149309            | 12570 | 17 | 6  | 0  | Low-quality | 36.88 |
| Sample_T4B_k141_72828             | 67972 | 60 | 1  | 49 | Low-quality | 36.87 |
| Sample_C7A_k141_130376            | 18449 | 44 | 4  | 0  | Low-quality | 36.87 |
| Sample_C13A_k141_32881            | 15304 | 17 | 9  | 0  | Low-quality | 36.85 |
| Sample_T2C_k141_234848            | 17126 | 14 | 0  | 2  | Low-quality | 36.84 |
| Sample_C13C_k141_13636            | 15794 | 27 | 7  | 1  | Low-quality | 36.84 |
| Sample_C9A_k141_132518_fragment_1 | 15403 | 12 | 6  | 0  | Low-quality | 36.83 |
| Sample_T3B_k141_125661            | 54482 | 54 | 13 | 13 | Low-quality | 36.81 |
| Sample_T10A_k141_102993           | 18383 | 41 | 4  | 0  | Low-quality | 36.8  |
| Sample_T4B_k141_250731_fragment_5 | 20753 | 21 | 4  | 1  | Low-quality | 36.8  |
| Sample_T10A_k141_98510            | 13254 | 24 | 9  | 0  | Low-quality | 36.79 |
| Sample_C2C_k141_272288            | 15090 | 18 | 10 | 0  | Low-quality | 36.78 |
| Sample_T8C_k141_92796_fragment_1  | 15558 | 24 | 9  | 0  | Low-quality | 36.78 |
| Sample_C3C_k141_22955             | 15453 | 29 | 0  | 29 | Low-quality | 36.77 |
| Sample_C4B_k141_68591             | 19024 | 24 | 10 | 0  | Low-quality | 36.76 |
| Sample_C2B_k141_227033            | 15075 | 29 | 10 | 0  | Low-quality | 36.75 |
| Sample_C5A_k141_153697            | 38318 | 40 | 7  | 1  | Low-quality | 36.75 |
| Sample_C11A_k141_62779            | 20479 | 15 | 0  | 3  | Low-quality | 36.72 |
| Sample_C6C_k141_192887            | 17399 | 17 | 0  | 8  | Low-quality | 36.72 |
| Sample_C13A_k141_15427            | 14470 | 28 | 6  | 0  | Low-quality | 36.71 |
| Sample_C1C_k141_82158             | 14538 | 21 | 7  | 0  | Low-quality | 36.71 |
| Sample_T2A_k141_157385            | 28117 | 31 | 0  | 4  | Low-quality | 36.69 |
| Sample_C13A_k141_79059            | 30984 | 50 | 19 | 0  | Low-quality | 36.69 |
| Sample_T2C_k141_113894            | 15527 | 25 | 5  | 0  | Low-quality | 36.68 |
| Sample_C5A_k141_273448_fragment_1 | 18666 | 30 | 9  | 2  | Low-quality | 36.67 |
| Sample_C7B_k141_62452             | 38322 | 45 | 2  | 23 | Low-quality | 36.66 |
| Sample_T4B_k141_194967            | 77445 | 57 | 2  | 29 | Low-quality | 36.66 |
| Sample_C12C_k141_145634           | 19382 | 20 | 3  | 3  | Low-quality | 36.66 |
| Sample_C4C_k141_89686             | 27293 | 20 | 1  | 8  | Low-quality | 36.64 |

|                                   |       |    |    |    |             |       |
|-----------------------------------|-------|----|----|----|-------------|-------|
| Sample_T18A_k141_127534           | 15583 | 11 | 0  | 3  | Low-quality | 36.64 |
| Sample_C2A_k141_154277            | 7056  | 7  | 5  | 0  | Low-quality | 36.64 |
| Sample_C5B_k141_41699             | 17381 | 23 | 2  | 1  | Low-quality | 36.63 |
| Sample_T15A_k141_158632           | 28221 | 20 | 2  | 2  | Low-quality | 36.61 |
| Sample_T6B_k141_55033             | 13375 | 27 | 5  | 1  | Low-quality | 36.57 |
| Sample_T16B_k141_54858            | 16680 | 19 | 10 | 0  | Low-quality | 36.55 |
| Sample_T6A_k141_195738            | 18175 | 33 | 8  | 0  | Low-quality | 36.54 |
| Sample_T15C_k141_55722_fragment_1 | 28192 | 51 | 5  | 1  | Low-quality | 36.53 |
| Sample_T8A_k141_18190             | 28153 | 15 | 0  | 6  | Low-quality | 36.5  |
| Sample_T18B_k141_40010            | 38792 | 44 | 19 | 4  | Low-quality | 36.5  |
| Sample_C13A_k141_65900            | 21136 | 35 | 7  | 3  | Low-quality | 36.48 |
| Sample_T7C_k141_128143            | 16443 | 21 | 8  | 0  | Low-quality | 36.47 |
| Sample_C8A_k141_148293_fragment_1 | 22858 | 39 | 25 | 2  | Low-quality | 36.46 |
| Sample_C7B_k141_126436            | 17559 | 23 | 9  | 0  | Low-quality | 36.45 |
| Sample_C7B_k141_91465             | 16466 | 21 | 4  | 0  | Low-quality | 36.44 |
| Sample_T5B_k141_2626              | 24395 | 31 | 0  | 7  | Low-quality | 36.42 |
| Sample_T8A_k141_190027            | 14660 | 17 | 9  | 0  | Low-quality | 36.38 |
| Sample_C11B_k141_48374            | 31519 | 40 | 1  | 16 | Low-quality | 36.37 |
| Sample_C10A_k141_131970           | 58643 | 54 | 2  | 27 | Low-quality | 36.36 |
| Sample_C2B_k141_257186            | 56710 | 60 | 1  | 25 | Low-quality | 36.34 |
| Sample_C2A_k141_74850             | 14260 | 14 | 0  | 3  | Low-quality | 36.33 |
| Sample_T4B_k141_191036            | 38464 | 38 | 0  | 23 | Low-quality | 36.32 |
| Sample_C10C_k141_205206           | 16462 | 20 | 15 | 0  | Low-quality | 36.32 |
| Sample_T2C_k141_258653            | 20244 | 13 | 0  | 4  | Low-quality | 36.3  |
| Sample_T18B_k141_72293            | 19565 | 25 | 5  | 1  | Low-quality | 36.29 |
| Sample_T4A_k141_104381_fragment_2 | 78772 | 84 | 5  | 8  | Low-quality | 36.26 |
| Sample_C9B_k141_11908             | 23948 | 25 | 1  | 6  | Low-quality | 36.24 |
| Sample_T7B_k141_131668            | 20404 | 26 | 0  | 4  | Low-quality | 36.24 |
| Sample_C3A_k141_72460             | 19417 | 32 | 7  | 1  | Low-quality | 36.23 |
| Sample_T6A_k141_105891            | 73852 | 59 | 1  | 14 | Low-quality | 36.22 |
| Sample_T6A_k141_279285            | 18254 | 23 | 11 | 0  | Low-quality | 36.22 |
| Sample_T8A_k141_2123_fragment_1   | 19718 | 34 | 7  | 0  | Low-quality | 36.21 |
| Sample_C1B_k141_42358             | 33485 | 16 | 2  | 0  | Low-quality | 36.19 |
| Sample_C12A_k141_144542           | 16797 | 18 | 0  | 16 | Low-quality | 36.16 |
| Sample_C2B_k141_190772            | 21130 | 35 | 8  | 0  | Low-quality | 36.14 |
| Sample_T17B_k141_26743            | 13398 | 16 | 11 | 0  | Low-quality | 36.11 |
| Sample_T2B_k141_174280            | 16656 | 22 | 1  | 8  | Low-quality | 36.1  |
| Sample_T3A_k141_62631             | 13459 | 15 | 0  | 6  | Low-quality | 36.1  |
| Sample_T10A_k141_104938           | 31768 | 21 | 0  | 7  | Low-quality | 36.09 |



|                                    |       |     |    |    |             |       |
|------------------------------------|-------|-----|----|----|-------------|-------|
| Sample_T11A_k141_107419            | 59981 | 51  | 1  | 36 | Low-quality | 36.07 |
| Sample_C4C_k141_140960             | 19695 | 41  | 10 | 1  | Low-quality | 36.07 |
| Sample_T11A_k141_130329            | 15339 | 11  | 0  | 3  | Low-quality | 36.04 |
| Sample_T14B_k141_151856            | 40329 | 43  | 1  | 7  | Low-quality | 36.04 |
| Sample_T12C_k141_138250            | 27396 | 52  | 11 | 1  | Low-quality | 36.03 |
| Sample_T6A_k141_64411              | 19197 | 24  | 6  | 2  | Low-quality | 36.03 |
| Sample_T10B_k141_32334             | 14149 | 19  | 12 | 0  | Low-quality | 36    |
| Sample_C11A_k141_93911             | 7579  | 9   | 1  | 0  | Low-quality | 35.99 |
| Sample_C10A_k141_210965            | 13047 | 9   | 2  | 0  | Low-quality | 35.98 |
| Sample_C4C_k141_224                | 22201 | 32  | 21 | 0  | Low-quality | 35.97 |
| Sample_C3A_k141_89321              | 12010 | 17  | 1  | 2  | Low-quality | 35.96 |
| Sample_C6C_k141_179130_fragment_1  | 13216 | 35  | 5  | 0  | Low-quality | 35.96 |
| Sample_T13B_k141_132373_fragment_1 | 14628 | 18  | 12 | 0  | Low-quality | 35.96 |
| Sample_T3A_k141_92891_fragment_4   | 17872 | 39  | 3  | 0  | Low-quality | 35.96 |
| Sample_T15C_k141_107961            | 13140 | 17  | 3  | 0  | Low-quality | 35.95 |
| Sample_C6C_k141_74965              | 21043 | 30  | 6  | 0  | Low-quality | 35.93 |
| Sample_T6C_k141_224402             | 35440 | 39  | 0  | 12 | Low-quality | 35.92 |
| Sample_C9C_k141_90437              | 39781 | 41  | 5  | 2  | Low-quality | 35.9  |
| Sample_T6A_k141_19086              | 25326 | 20  | 1  | 6  | Low-quality | 35.89 |
| Sample_T5B_k141_33841              | 14131 | 29  | 4  | 1  | Low-quality | 35.88 |
| Sample_C12C_k141_19361             | 14854 | 20  | 5  | 0  | Low-quality | 35.85 |
| Sample_T14B_k141_207693            | 12631 | 20  | 12 | 0  | Low-quality | 35.85 |
| Sample_C10C_k141_208782            | 6228  | 8   | 3  | 0  | Low-quality | 35.84 |
| Sample_C5C_k141_116744             | 15195 | 17  | 16 | 0  | Low-quality | 35.78 |
| Sample_T12B_k141_149734            | 88004 | 107 | 1  | 11 | Low-quality | 35.77 |
| Sample_T2A_k141_238410             | 19808 | 23  | 10 | 3  | Low-quality | 35.77 |
| Sample_C2B_k141_332115             | 11449 | 16  | 2  | 0  | Low-quality | 35.76 |
| Sample_T16C_k141_80032             | 23611 | 24  | 1  | 10 | Low-quality | 35.73 |
| Sample_T6A_k141_130132_fragment_1  | 12691 | 15  | 8  | 0  | Low-quality | 35.73 |
| Sample_C10A_k141_294757            | 84898 | 71  | 1  | 43 | Low-quality | 35.69 |
| Sample_T15B_k141_40481             | 14368 | 21  | 6  | 0  | Low-quality | 35.67 |
| Sample_C12A_k141_107221            | 28134 | 21  | 1  | 6  | Low-quality | 35.65 |
| Sample_T8B_k141_118026             | 19842 | 19  | 0  | 5  | Low-quality | 35.64 |
| Sample_C3A_k141_111466             | 16611 | 14  | 4  | 0  | Low-quality | 35.64 |
| Sample_T6C_k141_94163              | 18084 | 29  | 5  | 0  | Low-quality | 35.64 |
| Sample_T6B_k141_190149_fragment_1  | 33799 | 45  | 2  | 2  | Low-quality | 35.62 |
| Sample_C8C_k141_907                | 12388 | 15  | 5  | 1  | Low-quality | 35.6  |
| Sample_C10A_k141_223093            | 15555 | 26  | 6  | 0  | Low-quality | 35.59 |
| Sample_C4B_k141_124073             | 14567 | 23  | 14 | 0  | Low-quality | 35.58 |

|                                   |       |    |    |    |             |       |
|-----------------------------------|-------|----|----|----|-------------|-------|
| Sample_C4C_k141_120146            | 12257 | 16 | 9  | 0  | Low-quality | 35.58 |
| Sample_T13B_k141_61250            | 22019 | 24 | 4  | 1  | Low-quality | 35.58 |
| Sample_T12A_k141_189962           | 82636 | 87 | 17 | 2  | Low-quality | 35.56 |
| Sample_C6C_k141_89080             | 15980 | 14 | 4  | 1  | Low-quality | 35.55 |
| Sample_T2B_k141_201209            | 22595 | 27 | 0  | 6  | Low-quality | 35.55 |
| Sample_C4C_k141_154184            | 22875 | 23 | 2  | 1  | Low-quality | 35.55 |
| Sample_T2C_k141_215259            | 13401 | 20 | 6  | 0  | Low-quality | 35.55 |
| Sample_C1B_k141_31102             | 48216 | 46 | 2  | 8  | Low-quality | 35.5  |
| Sample_C12C_k141_81627            | 14523 | 18 | 2  | 2  | Low-quality | 35.49 |
| Sample_C9A_k141_85306             | 20280 | 23 | 2  | 4  | Low-quality | 35.49 |
| Sample_C13C_k141_59881_fragment_1 | 17085 | 32 | 11 | 2  | Low-quality | 35.47 |
| Sample_C8A_k141_54247             | 17167 | 16 | 2  | 1  | Low-quality | 35.47 |
| Sample_T16B_k141_93435            | 15662 | 35 | 6  | 2  | Low-quality | 35.47 |
| Sample_T5A_k141_33372             | 57152 | 55 | 2  | 16 | Low-quality | 35.44 |
| Sample_T8B_k141_502_fragment_1    | 22398 | 31 | 12 | 4  | Low-quality | 35.42 |
| Sample_C14A_k141_47936            | 21197 | 26 | 1  | 7  | Low-quality | 35.41 |
| Sample_C7C_k141_24372             | 18998 | 29 | 6  | 1  | Low-quality | 35.41 |
| Sample_T10B_k141_35262            | 19337 | 21 | 1  | 10 | Low-quality | 35.4  |
| Sample_C3A_k141_156103            | 14824 | 12 | 0  | 2  | Low-quality | 35.35 |
| Sample_C7B_k141_180666            | 13367 | 18 | 7  | 0  | Low-quality | 35.34 |
| Sample_T17C_k141_32375_fragment_1 | 15317 | 26 | 4  | 0  | Low-quality | 35.33 |
| Sample_C2C_k141_288574            | 27180 | 27 | 0  | 7  | Low-quality | 35.32 |
| Sample_T1C_k141_5745              | 26271 | 43 | 5  | 3  | Low-quality | 35.28 |
| Sample_T13B_k141_77555_fragment_1 | 24388 | 33 | 4  | 3  | Low-quality | 35.27 |
| Sample_T7C_k141_103173            | 28821 | 22 | 1  | 2  | Low-quality | 35.26 |
| Sample_T7C_k141_96026             | 21111 | 24 | 0  | 8  | Low-quality | 35.26 |
| Sample_T8B_k141_7690              | 83840 | 67 | 2  | 43 | Low-quality | 35.25 |
| Sample_C1B_k141_82122             | 14230 | 12 | 1  | 0  | Low-quality | 35.25 |
| Sample_C11C_k141_96386            | 21755 | 40 | 5  | 0  | Low-quality | 35.22 |
| Sample_C3A_k141_84716_fragment_2  | 25716 | 22 | 8  | 2  | Low-quality | 35.21 |
| Sample_T15B_k141_93124_fragment_2 | 28368 | 27 | 7  | 1  | Low-quality | 35.21 |
| Sample_T15A_k141_149478           | 27612 | 30 | 1  | 19 | Low-quality | 35.18 |
| Sample_T8C_k141_210412            | 27012 | 23 | 0  | 5  | Low-quality | 35.18 |
| Sample_C6A_k141_94365             | 13144 | 19 | 12 | 0  | Low-quality | 35.17 |
| Sample_C3A_k141_243019            | 14969 | 29 | 14 | 0  | Low-quality | 35.16 |
| Sample_T7A_k141_227956            | 5146  | 11 | 2  | 0  | Low-quality | 35.16 |
| Sample_T8B_k141_197434            | 5306  | 6  | 2  | 0  | Low-quality | 35.16 |
| Sample_T16B_k141_143677           | 39014 | 28 | 5  | 2  | Low-quality | 35.15 |
| Sample_T16C_k141_63268            | 16581 | 26 | 7  | 1  | Low-quality | 35.15 |

|                                   |        |    |    |    |             |       |
|-----------------------------------|--------|----|----|----|-------------|-------|
| Sample_C4A_k141_80803             | 119314 | 92 | 1  | 57 | Low-quality | 35.14 |
| Sample_C12B_k141_143327           | 15159  | 25 | 5  | 0  | Low-quality | 35.08 |
| Sample_C10A_k141_87103            | 15534  | 16 | 0  | 5  | Low-quality | 35.06 |
| Sample_C2A_k141_209176            | 16654  | 24 | 3  | 0  | Low-quality | 35.06 |
| Sample_C2A_k141_73019             | 13678  | 6  | 2  | 0  | Low-quality | 35.06 |
| Sample_C10A_k141_210305           | 21603  | 43 | 12 | 0  | Low-quality | 35.05 |
| Sample_T6A_k141_252670            | 5459   | 9  | 1  | 0  | Low-quality | 35.03 |
| Sample_T6C_k141_104387_fragment_3 | 32508  | 39 | 10 | 6  | Low-quality | 35.01 |
| Sample_C6A_k141_41586             | 20951  | 29 | 9  | 4  | Low-quality | 35    |
| Sample_T7C_k141_156312            | 15837  | 19 | 4  | 3  | Low-quality | 34.99 |
| Sample_C12A_k141_213002           | 19845  | 27 | 1  | 7  | Low-quality | 34.98 |
| Sample_C1C_k141_79400             | 16868  | 25 | 0  | 3  | Low-quality | 34.98 |
| Sample_C11A_k141_127732           | 83174  | 69 | 1  | 56 | Low-quality | 34.97 |
| Sample_C4B_k141_13806             | 28364  | 23 | 1  | 5  | Low-quality | 34.95 |
| Sample_T16C_k141_38705            | 14565  | 10 | 0  | 2  | Low-quality | 34.94 |
| Sample_T17A_k141_10236            | 13470  | 20 | 8  | 0  | Low-quality | 34.93 |
| Sample_T5C_k141_9207              | 15803  | 22 | 17 | 0  | Low-quality | 34.92 |
| Sample_T8A_k141_115932            | 12760  | 13 | 3  | 0  | Low-quality | 34.91 |
| Sample_C1B_k141_71604             | 15729  | 14 | 1  | 0  | Low-quality | 34.91 |
| Sample_T6C_k141_83822             | 20334  | 21 | 1  | 6  | Low-quality | 34.9  |
| Sample_T14A_k141_102133           | 19086  | 34 | 6  | 1  | Low-quality | 34.9  |
| Sample_C9C_k141_73649             | 24614  | 34 | 4  | 4  | Low-quality | 34.8  |
| Sample_C5B_k141_73753             | 14616  | 15 | 7  | 0  | Low-quality | 34.8  |
| Sample_C2B_k141_345278            | 12832  | 20 | 5  | 0  | Low-quality | 34.78 |
| Sample_C9A_k141_102964            | 19613  | 19 | 2  | 1  | Low-quality | 34.77 |
| Sample_T11A_k141_104955           | 14749  | 12 | 0  | 2  | Low-quality | 34.76 |
| Sample_T17B_k141_303              | 14606  | 21 | 0  | 8  | Low-quality | 34.75 |
| Sample_T18B_k141_137223           | 18568  | 21 | 11 | 3  | Low-quality | 34.74 |
| Sample_T8C_k141_70943             | 8012   | 9  | 5  | 0  | Low-quality | 34.74 |
| Sample_C10C_k141_85026            | 16144  | 14 | 0  | 3  | Low-quality | 34.73 |
| Sample_C14B_k141_68677            | 12950  | 21 | 1  | 0  | Low-quality | 34.71 |
| Sample_T5C_k141_163584            | 5398   | 9  | 0  | 0  | Low-quality | 34.71 |
| Sample_T2C_k141_124495            | 15640  | 36 | 5  | 0  | Low-quality | 34.7  |
| Sample_T3B_k141_152213            | 17680  | 21 | 11 | 2  | Low-quality | 34.7  |
| Sample_T6A_k141_227335            | 25354  | 26 | 1  | 12 | Low-quality | 34.68 |
| Sample_T12A_k141_88504            | 82608  | 70 | 10 | 3  | Low-quality | 34.68 |
| Sample_C6C_k141_86320             | 60518  | 52 | 0  | 46 | Low-quality | 34.67 |
| Sample_T14C_k141_148044           | 14813  | 12 | 0  | 1  | Low-quality | 34.66 |
| Sample_T6B_k141_124436            | 7745   | 11 | 2  | 0  | Low-quality | 34.66 |

|                                   |       |     |    |    |             |       |
|-----------------------------------|-------|-----|----|----|-------------|-------|
| Sample_T16B_k141_14699            | 14651 | 9   | 4  | 0  | Low-quality | 34.65 |
| Sample_C4C_k141_214462            | 21538 | 35  | 9  | 2  | Low-quality | 34.63 |
| Sample_T3B_k141_136760            | 60378 | 58  | 2  | 13 | Low-quality | 34.63 |
| Sample_T4B_k141_299361            | 55021 | 60  | 1  | 37 | Low-quality | 34.63 |
| Sample_T5C_k141_144838_fragment_2 | 25863 | 21  | 7  | 2  | Low-quality | 34.62 |
| Sample_T18C_k141_72599            | 14201 | 25  | 0  | 0  | Low-quality | 34.61 |
| Sample_T2A_k141_148115            | 50543 | 42  | 0  | 33 | Low-quality | 34.6  |
| Sample_C2B_k141_316803            | 15299 | 30  | 4  | 0  | Low-quality | 34.6  |
| Sample_T10B_k141_41053            | 13358 | 15  | 11 | 0  | Low-quality | 34.6  |
| Sample_T13A_k141_80522            | 28259 | 33  | 1  | 5  | Low-quality | 34.58 |
| Sample_T13C_k141_139223           | 19279 | 15  | 1  | 6  | Low-quality | 34.57 |
| Sample_C10A_k141_112843           | 55076 | 59  | 1  | 24 | Low-quality | 34.55 |
| Sample_C4A_k141_134699            | 15087 | 30  | 2  | 1  | Low-quality | 34.55 |
| Sample_T1A_k141_18831             | 24806 | 28  | 1  | 11 | Low-quality | 34.5  |
| Sample_T11B_k141_66869            | 22254 | 23  | 2  | 7  | Low-quality | 34.49 |
| Sample_T8C_k141_3031              | 19202 | 15  | 0  | 13 | Low-quality | 34.49 |
| Sample_C3C_k141_119116            | 61519 | 54  | 1  | 36 | Low-quality | 34.46 |
| Sample_C8B_k141_154193            | 15251 | 20  | 9  | 0  | Low-quality | 34.46 |
| Sample_C12C_k141_128716           | 10384 | 12  | 6  | 0  | Low-quality | 34.45 |
| Sample_C13A_k141_85720            | 17789 | 21  | 0  | 4  | Low-quality | 34.45 |
| Sample_C5C_k141_24669             | 14267 | 6   | 3  | 0  | Low-quality | 34.45 |
| Sample_T10B_k141_176110           | 60427 | 112 | 18 | 1  | Low-quality | 34.45 |
| Sample_T3C_k141_121506            | 5334  | 4   | 0  | 0  | Low-quality | 34.44 |
| Sample_T6B_k141_110769            | 25479 | 32  | 5  | 6  | Low-quality | 34.43 |
| Sample_C13C_k141_52889_fragment_1 | 20223 | 40  | 8  | 0  | Low-quality | 34.41 |
| Sample_C8B_k141_64584_fragment_1  | 11724 | 11  | 1  | 1  | Low-quality | 34.39 |
| Sample_C11A_k141_43065            | 23595 | 30  | 1  | 8  | Low-quality | 34.38 |
| Sample_T5A_k141_46515             | 14035 | 24  | 6  | 1  | Low-quality | 34.37 |
| Sample_C3A_k141_12678             | 30610 | 37  | 1  | 6  | Low-quality | 34.36 |
| Sample_C9A_k141_57916             | 17529 | 26  | 0  | 2  | Low-quality | 34.33 |
| Sample_C4B_k141_117521            | 85129 | 77  | 11 | 0  | Low-quality | 34.31 |
| Sample_C10A_k141_4028             | 14647 | 21  | 6  | 0  | Low-quality | 34.29 |
| Sample_T15B_k141_56376            | 12972 | 17  | 6  | 0  | Low-quality | 34.29 |
| Sample_T14A_k141_4095             | 13243 | 28  | 1  | 0  | Low-quality | 34.26 |
| Sample_T12B_k141_20749_fragment_1 | 12670 | 15  | 4  | 0  | Low-quality | 34.24 |
| Sample_T7C_k141_54492             | 13953 | 22  | 18 | 0  | Low-quality | 34.24 |
| Sample_T15B_k141_4779             | 22622 | 26  | 1  | 4  | Low-quality | 34.23 |
| Sample_C10A_k141_323481           | 23264 | 40  | 2  | 7  | Low-quality | 34.2  |
| Sample_C4B_k141_164882            | 13266 | 26  | 2  | 0  | Low-quality | 34.2  |

|                                  |        |     |    |    |             |       |
|----------------------------------|--------|-----|----|----|-------------|-------|
| Sample_C8C_k141_135905           | 10767  | 15  | 2  | 0  | Low-quality | 34.2  |
| Sample_T6A_k141_31077            | 22594  | 25  | 1  | 8  | Low-quality | 34.19 |
| Sample_T14B_k141_114137          | 14455  | 14  | 1  | 2  | Low-quality | 34.17 |
| Sample_T8C_k141_111097           | 22207  | 36  | 3  | 3  | Low-quality | 34.15 |
| Sample_T2B_k141_261052           | 15782  | 15  | 0  | 2  | Low-quality | 34.12 |
| Sample_C12A_k141_6571            | 23276  | 19  | 0  | 14 | Low-quality | 34.11 |
| Sample_C3A_k141_110906           | 13542  | 9   | 0  | 0  | Low-quality | 34.11 |
| Sample_C1A_k141_2350             | 36099  | 34  | 1  | 11 | Low-quality | 34.09 |
| Sample_T15C_k141_32286           | 83933  | 76  | 1  | 33 | Low-quality | 34.09 |
| Sample_T15C_k141_122345          | 54947  | 51  | 2  | 15 | Low-quality | 34.07 |
| Sample_C12A_k141_155923          | 36835  | 49  | 0  | 38 | Low-quality | 34.06 |
| Sample_T8B_k141_189970           | 15817  | 15  | 0  | 5  | Low-quality | 34.02 |
| Sample_T17C_k141_9274_fragment_1 | 22858  | 28  | 11 | 7  | Low-quality | 34.02 |
| Sample_T8A_k141_177801           | 14616  | 24  | 10 | 0  | Low-quality | 34.02 |
| Sample_C6B_k141_162939           | 24591  | 21  | 0  | 7  | Low-quality | 34.01 |
| Sample_T8B_k141_5837             | 62656  | 46  | 1  | 35 | Low-quality | 33.98 |
| Sample_C11C_k141_24473           | 16656  | 16  | 0  | 12 | Low-quality | 33.96 |
| Sample_T4A_k141_76742            | 18995  | 19  | 3  | 3  | Low-quality | 33.96 |
| Sample_C10A_k141_125978          | 63428  | 65  | 1  | 38 | Low-quality | 33.95 |
| Sample_T10C_k141_81109           | 123871 | 105 | 1  | 69 | Low-quality | 33.94 |
| Sample_T15B_k141_47022           | 63100  | 56  | 1  | 17 | Low-quality | 33.92 |
| Sample_C4B_k141_15539            | 20300  | 25  | 4  | 4  | Low-quality | 33.92 |
| Sample_T5A_k141_53348_fragment_1 | 16445  | 21  | 9  | 0  | Low-quality | 33.91 |
| Sample_C14A_k141_137653          | 18099  | 31  | 14 | 0  | Low-quality | 33.9  |
| Sample_T8C_k141_183565           | 16898  | 22  | 2  | 3  | Low-quality | 33.89 |
| Sample_T6A_k141_166027           | 12357  | 16  | 5  | 0  | Low-quality | 33.88 |
| Sample_T10B_k141_106379          | 51831  | 46  | 2  | 14 | Low-quality | 33.86 |
| Sample_C10B_k141_59497           | 18369  | 28  | 6  | 0  | Low-quality | 33.84 |
| Sample_T7C_k141_69974            | 26728  | 63  | 6  | 3  | Low-quality | 33.84 |
| Sample_T8C_k141_67193            | 14063  | 21  | 5  | 1  | Low-quality | 33.83 |
| Sample_T8B_k141_117265           | 13384  | 12  | 3  | 0  | Low-quality | 33.82 |
| Sample_T3B_k141_122518           | 13482  | 22  | 3  | 0  | Low-quality | 33.79 |
| Sample_C8B_k141_55898            | 17699  | 25  | 9  | 0  | Low-quality | 33.78 |
| Sample_C7C_k141_1498             | 24377  | 19  | 2  | 3  | Low-quality | 33.77 |
| Sample_C10A_k141_246157          | 11287  | 20  | 7  | 0  | Low-quality | 33.76 |
| Sample_C2B_k141_11720            | 13310  | 17  | 8  | 0  | Low-quality | 33.76 |
| Sample_T12A_k141_211399          | 37377  | 37  | 1  | 14 | Low-quality | 33.75 |
| Sample_T6B_k141_90135            | 12636  | 20  | 10 | 0  | Low-quality | 33.74 |
| Sample_C6B_k141_117494           | 18377  | 18  | 2  | 2  | Low-quality | 33.72 |

|                                    |       |    |    |    |             |       |
|------------------------------------|-------|----|----|----|-------------|-------|
| Sample_C13C_k141_65981             | 13637 | 16 | 12 | 0  | Low-quality | 33.71 |
| Sample_T16B_k141_65623_fragment_1  | 58288 | 92 | 18 | 3  | Low-quality | 33.71 |
| Sample_C14A_k141_110678            | 22231 | 33 | 14 | 1  | Low-quality | 33.68 |
| Sample_C4C_k141_245827             | 27098 | 15 | 0  | 5  | Low-quality | 33.67 |
| Sample_C11C_k141_133875            | 30092 | 30 | 4  | 5  | Low-quality | 33.66 |
| Sample_C7B_k141_78343              | 11461 | 18 | 10 | 0  | Low-quality | 33.66 |
| Sample_C11B_k141_184562            | 12297 | 28 | 4  | 2  | Low-quality | 33.65 |
| Sample_C2C_k141_297634             | 57429 | 65 | 2  | 26 | Low-quality | 33.64 |
| Sample_T18B_k141_13614             | 22229 | 28 | 1  | 7  | Low-quality | 33.64 |
| Sample_C11A_k141_143838_fragment_3 | 63184 | 65 | 10 | 5  | Low-quality | 33.64 |
| Sample_T12A_k141_26626             | 14228 | 28 | 3  | 0  | Low-quality | 33.63 |
| Sample_C8C_k141_95732              | 19430 | 27 | 3  | 1  | Low-quality | 33.62 |
| Sample_C2C_k141_48412              | 29916 | 42 | 1  | 3  | Low-quality | 33.58 |
| Sample_T1A_k141_33333              | 18718 | 16 | 0  | 4  | Low-quality | 33.57 |
| Sample_T7B_k141_3225               | 12918 | 13 | 0  | 1  | Low-quality | 33.57 |
| Sample_T2A_k141_141246             | 15601 | 13 | 1  | 5  | Low-quality | 33.56 |
| Sample_C5A_k141_126417             | 36060 | 28 | 0  | 23 | Low-quality | 33.55 |
| Sample_T10A_k141_24907             | 21557 | 24 | 0  | 6  | Low-quality | 33.54 |
| Sample_C3A_k141_171947             | 20097 | 37 | 9  | 0  | Low-quality | 33.54 |
| Sample_T11C_k141_59959             | 13137 | 26 | 1  | 0  | Low-quality | 33.52 |
| Sample_C10C_k141_170897            | 37692 | 34 | 1  | 6  | Low-quality | 33.51 |
| Sample_C2B_k141_186143             | 20046 | 24 | 0  | 6  | Low-quality | 33.48 |
| Sample_C9B_k141_22634              | 38711 | 53 | 7  | 3  | Low-quality | 33.48 |
| Sample_T2B_k141_160581             | 36739 | 18 | 1  | 4  | Low-quality | 33.46 |
| Sample_T5B_k141_6663               | 16131 | 21 | 11 | 1  | Low-quality | 33.45 |
| Sample_C2B_k141_77170              | 13843 | 22 | 0  | 0  | Low-quality | 33.45 |
| Sample_C3A_k141_240655             | 14622 | 24 | 2  | 0  | Low-quality | 33.44 |
| Sample_T7B_k141_108776             | 14402 | 29 | 8  | 0  | Low-quality | 33.43 |
| Sample_T6A_k141_198291             | 13956 | 14 | 0  | 2  | Low-quality | 33.39 |
| Sample_C4B_k141_248324             | 17972 | 38 | 5  | 0  | Low-quality | 33.37 |
| Sample_T16C_k141_16585             | 38830 | 46 | 1  | 21 | Low-quality | 33.37 |
| Sample_T17A_k141_43120             | 37142 | 43 | 1  | 14 | Low-quality | 33.37 |
| Sample_C14A_k141_238892            | 8688  | 12 | 3  | 0  | Low-quality | 33.36 |
| Sample_T12C_k141_131086            | 26887 | 54 | 9  | 2  | Low-quality | 33.36 |
| Sample_C13A_k141_113897            | 36925 | 43 | 2  | 2  | Low-quality | 33.32 |
| Sample_T10B_k141_120802_fragment_2 | 12867 | 24 | 4  | 1  | Low-quality | 33.32 |
| Sample_C6B_k141_177414             | 28126 | 29 | 5  | 10 | Low-quality | 33.31 |
| Sample_T10C_k141_89313             | 42327 | 41 | 2  | 12 | Low-quality | 33.31 |
| Sample_T6A_k141_11387              | 22747 | 44 | 11 | 6  | Low-quality | 33.29 |

|                                    |       |    |    |    |             |       |
|------------------------------------|-------|----|----|----|-------------|-------|
| Sample_T17C_k141_34031             | 17611 | 35 | 2  | 1  | Low-quality | 33.27 |
| Sample_T15A_k141_125430            | 21827 | 23 | 4  | 6  | Low-quality | 33.26 |
| Sample_T5C_k141_160710             | 15819 | 29 | 3  | 0  | Low-quality | 33.25 |
| Sample_T10B_k141_80028             | 12727 | 19 | 4  | 0  | Low-quality | 33.24 |
| Sample_C10B_k141_5682              | 19219 | 22 | 8  | 4  | Low-quality | 33.23 |
| Sample_T14C_k141_5446              | 11995 | 16 | 11 | 0  | Low-quality | 33.23 |
| Sample_T7A_k141_140904             | 61430 | 57 | 2  | 8  | Low-quality | 33.2  |
| Sample_C13B_k141_109061_fragment_1 | 13323 | 16 | 9  | 0  | Low-quality | 33.2  |
| Sample_T16C_k141_133808_fragment_4 | 12314 | 20 | 4  | 0  | Low-quality | 33.2  |
| Sample_T6B_k141_73453              | 12928 | 22 | 12 | 0  | Low-quality | 33.19 |
| Sample_T7A_k141_128531             | 16364 | 29 | 3  | 1  | Low-quality | 33.19 |
| Sample_T11B_k141_83744             | 21249 | 18 | 1  | 5  | Low-quality | 33.18 |
| Sample_C6C_k141_52736              | 71802 | 55 | 1  | 44 | Low-quality | 33.17 |
| Sample_T4A_k141_53967_fragment_1   | 17642 | 22 | 2  | 0  | Low-quality | 33.15 |
| Sample_T15B_k141_123070            | 28102 | 53 | 2  | 4  | Low-quality | 33.13 |
| Sample_T5B_k141_82066              | 25869 | 31 | 1  | 7  | Low-quality | 33.13 |
| Sample_T15A_k141_110676            | 18365 | 37 | 7  | 1  | Low-quality | 33.12 |
| Sample_T6A_k141_166113             | 27920 | 25 | 1  | 14 | Low-quality | 33.11 |
| Sample_C14A_k141_51622             | 13211 | 18 | 9  | 0  | Low-quality | 33.11 |
| Sample_T13B_k141_166595            | 16232 | 11 | 0  | 3  | Low-quality | 33.09 |
| Sample_T11B_k141_22490_fragment_3  | 18611 | 25 | 10 | 5  | Low-quality | 33.09 |
| Sample_C2B_k141_40762              | 12357 | 21 | 8  | 0  | Low-quality | 33.08 |
| Sample_T13C_k141_93106             | 15322 | 24 | 4  | 1  | Low-quality | 33.07 |
| Sample_C2A_k141_117133_fragment_1  | 13463 | 19 | 6  | 1  | Low-quality | 33.06 |
| Sample_T4B_k141_255557             | 12355 | 20 | 5  | 0  | Low-quality | 33.06 |
| Sample_C12C_k141_222453            | 13341 | 16 | 12 | 0  | Low-quality | 33.05 |
| Sample_C13C_k141_94466_fragment_1  | 11746 | 22 | 10 | 0  | Low-quality | 33.04 |
| Sample_T13C_k141_72909             | 5112  | 7  | 1  | 0  | Low-quality | 33.04 |
| Sample_T3B_k141_162877             | 9478  | 11 | 4  | 0  | Low-quality | 33.04 |
| Sample_T6B_k141_85609              | 40709 | 33 | 1  | 15 | Low-quality | 33.02 |
| Sample_C8A_k141_74615_fragment_1   | 11237 | 22 | 0  | 0  | Low-quality | 33.02 |
| Sample_T8A_k141_202831             | 18285 | 9  | 0  | 7  | Low-quality | 33.01 |
| Sample_T5A_k141_47915_fragment_1   | 26570 | 50 | 11 | 1  | Low-quality | 33.01 |
| Sample_C1B_k141_155273             | 13919 | 19 | 8  | 0  | Low-quality | 33    |
| Sample_T5C_k141_97195_fragment_2   | 14198 | 22 | 4  | 0  | Low-quality | 33    |
| Sample_T12A_k141_75468             | 60823 | 63 | 1  | 51 | Low-quality | 32.99 |
| Sample_T16C_k141_77362             | 14190 | 27 | 6  | 1  | Low-quality | 32.98 |
| Sample_C5A_k141_196838_fragment_4  | 12502 | 14 | 4  | 0  | Low-quality | 32.97 |
| Sample_C7A_k141_45799_fragment_1   | 12632 | 24 | 6  | 0  | Low-quality | 32.95 |

|                                   |       |    |    |    |             |       |
|-----------------------------------|-------|----|----|----|-------------|-------|
| Sample_C10A_k141_108715           | 60696 | 59 | 1  | 47 | Low-quality | 32.91 |
| Sample_C7A_k141_86631             | 43824 | 58 | 12 | 0  | Low-quality | 32.91 |
| Sample_T7B_k141_151969            | 21647 | 35 | 3  | 1  | Low-quality | 32.91 |
| Sample_T17C_k141_5900             | 18346 | 17 | 0  | 4  | Low-quality | 32.9  |
| Sample_T8C_k141_29520             | 53336 | 48 | 1  | 19 | Low-quality | 32.9  |
| Sample_T8C_k141_78531             | 9847  | 10 | 0  | 3  | Low-quality | 32.9  |
| Sample_C12B_k141_116531           | 14452 | 14 | 4  | 0  | Low-quality | 32.88 |
| Sample_T4B_k141_325809            | 28436 | 24 | 1  | 10 | Low-quality | 32.87 |
| Sample_T10B_k141_45338_fragment_1 | 19899 | 23 | 0  | 6  | Low-quality | 32.87 |
| Sample_T5C_k141_179544            | 20930 | 27 | 0  | 3  | Low-quality | 32.86 |
| Sample_T17C_k141_29132            | 9417  | 9  | 0  | 4  | Low-quality | 32.82 |
| Sample_T13A_k141_124846           | 14408 | 15 | 7  | 1  | Low-quality | 32.82 |
| Sample_T5C_k141_115001            | 18613 | 29 | 4  | 4  | Low-quality | 32.8  |
| Sample_C2C_k141_73512             | 17074 | 33 | 1  | 2  | Low-quality | 32.79 |
| Sample_T10C_k141_44444            | 14159 | 28 | 7  | 0  | Low-quality | 32.79 |
| Sample_T12A_k141_286705           | 14559 | 25 | 2  | 1  | Low-quality | 32.79 |
| Sample_C14B_k141_35048            | 13388 | 21 | 7  | 0  | Low-quality | 32.77 |
| Sample_T8B_k141_246391            | 14459 | 16 | 0  | 1  | Low-quality | 32.76 |
| Sample_T7B_k141_112689            | 15494 | 15 | 1  | 2  | Low-quality | 32.75 |
| Sample_C13B_k141_72567            | 16019 | 30 | 6  | 0  | Low-quality | 32.75 |
| Sample_C11A_k141_75972            | 12809 | 18 | 1  | 3  | Low-quality | 32.73 |
| Sample_T4B_k141_127067            | 64589 | 68 | 2  | 48 | Low-quality | 32.73 |
| Sample_C14C_k141_59059            | 36852 | 41 | 1  | 8  | Low-quality | 32.72 |
| Sample_T15C_k141_113199           | 49722 | 35 | 0  | 18 | Low-quality | 32.72 |
| Sample_T16C_k141_76714            | 13043 | 17 | 0  | 0  | Low-quality | 32.71 |
| Sample_C1B_k141_4851              | 17855 | 31 | 8  | 0  | Low-quality | 32.66 |
| Sample_C6B_k141_114669_fragment_1 | 19347 | 17 | 6  | 2  | Low-quality | 32.66 |
| Sample_T8B_k141_31324             | 15422 | 20 | 7  | 1  | Low-quality | 32.66 |
| Sample_T7A_k141_119875            | 52655 | 56 | 2  | 9  | Low-quality | 32.65 |
| Sample_T5C_k141_31872             | 24862 | 19 | 0  | 3  | Low-quality | 32.64 |
| Sample_T6B_k141_100918            | 12219 | 24 | 2  | 3  | Low-quality | 32.64 |
| Sample_C12B_k141_35719            | 80948 | 72 | 1  | 32 | Low-quality | 32.62 |
| Sample_C10A_k141_286318           | 18847 | 25 | 14 | 4  | Low-quality | 32.61 |
| Sample_C2B_k141_56731             | 13270 | 25 | 4  | 3  | Low-quality | 32.59 |
| Sample_T16B_k141_131473           | 10776 | 14 | 3  | 0  | Low-quality | 32.59 |
| Sample_T17C_k141_1444             | 11371 | 13 | 6  | 0  | Low-quality | 32.59 |
| Sample_T16B_k141_126275           | 55300 | 71 | 2  | 4  | Low-quality | 32.58 |
| Sample_C7A_k141_45435_fragment_1  | 14534 | 28 | 4  | 2  | Low-quality | 32.56 |
| Sample_T18B_k141_74729            | 80019 | 80 | 1  | 35 | Low-quality | 32.52 |



|                                    |       |    |    |    |             |       |
|------------------------------------|-------|----|----|----|-------------|-------|
| Sample_C8C_k141_89290              | 14491 | 17 | 2  | 2  | Low-quality | 32.51 |
| Sample_T13B_k141_19022_fragment_1  | 13686 | 20 | 5  | 0  | Low-quality | 32.51 |
| Sample_T4C_k141_11847              | 9373  | 14 | 0  | 2  | Low-quality | 32.49 |
| Sample_C8B_k141_85668              | 14987 | 18 | 13 | 0  | Low-quality | 32.49 |
| Sample_T11C_k141_156225_fragment_1 | 13726 | 18 | 5  | 1  | Low-quality | 32.48 |
| Sample_C12C_k141_171733            | 32612 | 32 | 0  | 8  | Low-quality | 32.46 |
| Sample_C2A_k141_212032_fragment_1  | 13448 | 15 | 3  | 0  | Low-quality | 32.45 |
| Sample_T5B_k141_18057              | 30731 | 64 | 6  | 1  | Low-quality | 32.44 |
| Sample_T10B_k141_97784             | 16994 | 36 | 6  | 1  | Low-quality | 32.43 |
| Sample_T10C_k141_18923             | 9300  | 13 | 3  | 0  | Low-quality | 32.42 |
| Sample_C3C_k141_137362             | 22244 | 28 | 1  | 8  | Low-quality | 32.41 |
| Sample_T13C_k141_18595             | 12232 | 18 | 11 | 0  | Low-quality | 32.41 |
| Sample_T3A_k141_84166_fragment_1   | 15278 | 20 | 14 | 2  | Low-quality | 32.41 |
| Sample_C4C_k141_213989             | 51607 | 75 | 4  | 25 | Low-quality | 32.38 |
| Sample_T7A_k141_207354             | 12883 | 17 | 0  | 2  | Low-quality | 32.38 |
| Sample_T11C_k141_62205             | 15037 | 17 | 0  | 0  | Low-quality | 32.36 |
| Sample_T3C_k141_120469             | 18075 | 12 | 0  | 3  | Low-quality | 32.33 |
| Sample_C12A_k141_75593             | 19348 | 22 | 0  | 4  | Low-quality | 32.32 |
| Sample_T13C_k141_119010            | 12041 | 6  | 1  | 0  | Low-quality | 32.31 |
| Sample_C9C_k141_11313              | 13576 | 14 | 0  | 10 | Low-quality | 32.3  |
| Sample_T4B_k141_35390              | 12328 | 17 | 4  | 0  | Low-quality | 32.3  |
| Sample_C10B_k141_159234            | 12315 | 29 | 0  | 0  | Low-quality | 32.29 |
| Sample_C2C_k141_217565             | 15285 | 19 | 5  | 0  | Low-quality | 32.27 |
| Sample_C12A_k141_193723_fragment_4 | 13153 | 17 | 6  | 0  | Low-quality | 32.26 |
| Sample_T8C_k141_146554_fragment_5  | 34766 | 44 | 6  | 4  | Low-quality | 32.26 |
| Sample_T17A_k141_31894             | 13220 | 19 | 12 | 0  | Low-quality | 32.25 |
| Sample_C14A_k141_221639            | 17738 | 24 | 12 | 0  | Low-quality | 32.23 |
| Sample_T10A_k141_28926_fragment_1  | 11031 | 19 | 3  | 0  | Low-quality | 32.23 |
| Sample_C14A_k141_32900             | 14382 | 18 | 6  | 0  | Low-quality | 32.22 |
| Sample_C12A_k141_86393             | 13036 | 17 | 9  | 0  | Low-quality | 32.21 |
| Sample_T13A_k141_82552             | 12893 | 23 | 10 | 0  | Low-quality | 32.2  |
| Sample_T10B_k141_145824            | 16237 | 20 | 2  | 2  | Low-quality | 32.18 |
| Sample_C11C_k141_3364_fragment_1   | 11684 | 14 | 10 | 0  | Low-quality | 32.17 |
| Sample_T4B_k141_321552             | 12074 | 19 | 9  | 0  | Low-quality | 32.17 |
| Sample_C10B_k141_19651             | 43129 | 52 | 0  | 7  | Low-quality | 32.14 |
| Sample_C8A_k141_142771_fragment_1  | 17681 | 30 | 7  | 0  | Low-quality | 32.14 |
| Sample_T3A_k141_842                | 15539 | 22 | 4  | 0  | Low-quality | 32.14 |
| Sample_C3A_k141_120760_fragment_1  | 12889 | 19 | 1  | 1  | Low-quality | 32.12 |
| Sample_T10B_k141_172618            | 56616 | 54 | 13 | 2  | Low-quality | 32.12 |

|                                    |        |     |    |     |             |       |
|------------------------------------|--------|-----|----|-----|-------------|-------|
| Sample_T12C_k141_6869              | 24021  | 39  | 4  | 3   | Low-quality | 32.12 |
| Sample_C11A_k141_79656             | 76926  | 82  | 6  | 17  | Low-quality | 32.1  |
| Sample_T1A_k141_15559              | 13582  | 21  | 15 | 0   | Low-quality | 32.1  |
| Sample_C14C_k141_124115            | 11679  | 14  | 2  | 2   | Low-quality | 32.06 |
| Sample_C10A_k141_227910            | 20003  | 32  | 8  | 1   | Low-quality | 32.05 |
| Sample_C11A_k141_133431_fragment_1 | 19742  | 29  | 9  | 0   | Low-quality | 32.05 |
| Sample_T7A_k141_190911             | 17003  | 31  | 2  | 4   | Low-quality | 32.05 |
| Sample_T8C_k141_2714               | 8430   | 9   | 2  | 0   | Low-quality | 32.05 |
| Sample_T7B_k141_135124             | 19036  | 32  | 1  | 1   | Low-quality | 32.04 |
| Sample_C14A_k141_159413            | 14400  | 27  | 5  | 0   | Low-quality | 32.03 |
| Sample_T5B_k141_13117              | 23745  | 12  | 0  | 3   | Low-quality | 32.01 |
| Sample_C13C_k141_24552_fragment_1  | 16905  | 26  | 4  | 0   | Low-quality | 32    |
| Sample_C4A_k141_126934             | 12970  | 9   | 0  | 1   | Low-quality | 31.99 |
| Sample_C5C_k141_25550              | 34208  | 31  | 0  | 5   | Low-quality | 31.98 |
| Sample_T12A_k141_317922            | 14292  | 20  | 6  | 0   | Low-quality | 31.95 |
| Sample_T5A_k141_45267              | 33658  | 37  | 3  | 2   | Low-quality | 31.94 |
| Sample_T12C_k141_24285_fragment_1  | 13087  | 13  | 4  | 2   | Low-quality | 31.93 |
| Sample_T14A_k141_205005            | 15466  | 30  | 7  | 0   | Low-quality | 31.93 |
| Sample_T15C_k141_50862_fragment_1  | 11669  | 13  | 0  | 0   | Low-quality | 31.92 |
| Sample_C11A_k141_142925            | 15709  | 30  | 6  | 0   | Low-quality | 31.9  |
| Sample_C2B_k141_141063_fragment_1  | 12992  | 12  | 2  | 1   | Low-quality | 31.9  |
| Sample_C1C_k141_40649              | 12987  | 20  | 18 | 0   | Low-quality | 31.89 |
| Sample_T16B_k141_65838             | 14872  | 24  | 13 | 1   | Low-quality | 31.88 |
| Sample_C4B_k141_91216              | 50486  | 57  | 1  | 27  | Low-quality | 31.85 |
| Sample_T13B_k141_104087            | 172502 | 173 | 2  | 145 | Low-quality | 31.84 |
| Sample_C10A_k141_240059_fragment_1 | 12323  | 23  | 11 | 0   | Low-quality | 31.84 |
| Sample_T2A_k141_144664             | 27531  | 27  | 1  | 7   | Low-quality | 31.82 |
| Sample_C3A_k141_115940_fragment_1  | 13586  | 19  | 9  | 1   | Low-quality | 31.81 |
| Sample_T16C_k141_1940_fragment_1   | 15573  | 20  | 4  | 1   | Low-quality | 31.8  |
| Sample_C4C_k141_174468             | 112412 | 84  | 1  | 60  | Low-quality | 31.78 |
| Sample_T4B_k141_332858             | 52445  | 103 | 10 | 2   | Low-quality | 31.78 |
| Sample_T16B_k141_634               | 58571  | 53  | 1  | 32  | Low-quality | 31.77 |
| Sample_C10A_k141_195880            | 11093  | 13  | 6  | 0   | Low-quality | 31.77 |
| Sample_T6A_k141_10503              | 12512  | 19  | 12 | 0   | Low-quality | 31.74 |
| Sample_T15B_k141_110781            | 15762  | 35  | 4  | 0   | Low-quality | 31.73 |
| Sample_T6C_k141_211191             | 139127 | 125 | 12 | 43  | Low-quality | 31.72 |
| Sample_C1B_k141_49343              | 14307  | 13  | 1  | 0   | Low-quality | 31.72 |
| Sample_C12A_k141_48679             | 20299  | 21  | 1  | 13  | Low-quality | 31.7  |
| Sample_C12A_k141_48887             | 11635  | 15  | 8  | 0   | Low-quality | 31.7  |

|                                    |        |     |    |     |             |       |
|------------------------------------|--------|-----|----|-----|-------------|-------|
| Sample_C10A_k141_31586             | 378060 | 344 | 1  | 268 | Low-quality | 31.69 |
| Sample_C7A_k141_149120             | 12944  | 11  | 3  | 1   | Low-quality | 31.69 |
| Sample_T8B_k141_66071              | 22524  | 22  | 1  | 10  | Low-quality | 31.69 |
| Sample_C9A_k141_100511_fragment_1  | 31983  | 33  | 2  | 4   | Low-quality | 31.68 |
| Sample_T2B_k141_297810             | 14221  | 15  | 1  | 1   | Low-quality | 31.67 |
| Sample_T2C_k141_4053               | 9077   | 10  | 4  | 0   | Low-quality | 31.64 |
| Sample_C1C_k141_126060             | 26161  | 29  | 1  | 11  | Low-quality | 31.62 |
| Sample_T5A_k141_20006              | 16718  | 15  | 3  | 1   | Low-quality | 31.62 |
| Sample_C9A_k141_55985              | 13099  | 23  | 9  | 0   | Low-quality | 31.61 |
| Sample_T11B_k141_24758             | 19296  | 27  | 2  | 1   | Low-quality | 31.61 |
| Sample_C13C_k141_57572             | 15453  | 22  | 19 | 0   | Low-quality | 31.6  |
| Sample_C3C_k141_42994              | 12351  | 15  | 0  | 1   | Low-quality | 31.58 |
| Sample_C2A_k141_174303             | 37488  | 52  | 6  | 3   | Low-quality | 31.58 |
| Sample_T13B_k141_24386             | 11835  | 19  | 10 | 0   | Low-quality | 31.58 |
| Sample_T7B_k141_82945              | 16881  | 21  | 13 | 1   | Low-quality | 31.58 |
| Sample_T7C_k141_54544              | 18222  | 22  | 1  | 7   | Low-quality | 31.56 |
| Sample_T10A_k141_115856            | 13144  | 19  | 11 | 0   | Low-quality | 31.54 |
| Sample_C4B_k141_226552             | 11881  | 19  | 7  | 1   | Low-quality | 31.53 |
| Sample_C8B_k141_192328             | 22248  | 19  | 1  | 10  | Low-quality | 31.52 |
| Sample_C9B_k141_12935              | 24097  | 26  | 3  | 6   | Low-quality | 31.52 |
| Sample_T17A_k141_39485             | 11480  | 15  | 9  | 0   | Low-quality | 31.5  |
| Sample_C11B_k141_228792            | 11773  | 21  | 7  | 0   | Low-quality | 31.49 |
| Sample_C10A_k141_105455            | 14834  | 19  | 9  | 0   | Low-quality | 31.48 |
| Sample_T10B_k141_92189             | 16828  | 22  | 7  | 2   | Low-quality | 31.45 |
| Sample_T12A_k141_54102             | 14218  | 15  | 14 | 0   | Low-quality | 31.45 |
| Sample_T13A_k141_50813             | 30744  | 39  | 19 | 2   | Low-quality | 31.45 |
| Sample_T3A_k141_48978              | 10204  | 11  | 6  | 0   | Low-quality | 31.44 |
| Sample_T5C_k141_32173              | 19244  | 12  | 0  | 2   | Low-quality | 31.44 |
| Sample_T12B_k141_71836             | 11875  | 14  | 4  | 0   | Low-quality | 31.43 |
| Sample_C14C_k141_120478            | 11957  | 13  | 5  | 0   | Low-quality | 31.4  |
| Sample_T3B_k141_48518              | 12895  | 26  | 1  | 0   | Low-quality | 31.39 |
| Sample_T13C_k141_126870_fragment_1 | 13984  | 19  | 7  | 0   | Low-quality | 31.37 |
| Sample_T6B_k141_84324              | 14306  | 20  | 6  | 2   | Low-quality | 31.35 |
| Sample_C11B_k141_148759            | 19552  | 34  | 2  | 0   | Low-quality | 31.34 |
| Sample_C12C_k141_170999            | 109998 | 96  | 1  | 65  | Low-quality | 31.3  |
| Sample_T7C_k141_150027             | 14211  | 28  | 1  | 2   | Low-quality | 31.3  |
| Sample_C9C_k141_57148              | 9574   | 4   | 0  | 0   | Low-quality | 31.28 |
| Sample_T15C_k141_116632            | 15944  | 19  | 1  | 3   | Low-quality | 31.27 |
| Sample_C11C_k141_56460_fragment_1  | 14537  | 10  | 0  | 2   | Low-quality | 31.27 |

|                                    |       |    |    |    |             |       |
|------------------------------------|-------|----|----|----|-------------|-------|
| Sample_T13B_k141_131493_fragment_1 | 20096 | 15 | 12 | 0  | Low-quality | 31.27 |
| Sample_T11C_k141_135865            | 43385 | 43 | 1  | 15 | Low-quality | 31.26 |
| Sample_C2A_k141_269521             | 15780 | 21 | 6  | 2  | Low-quality | 31.26 |
| Sample_T15A_k141_178928            | 17077 | 32 | 8  | 0  | Low-quality | 31.26 |
| Sample_C10A_k141_134474            | 27082 | 31 | 1  | 7  | Low-quality | 31.25 |
| Sample_T5B_k141_34827_fragment_1   | 13787 | 24 | 1  | 3  | Low-quality | 31.25 |
| Sample_C3B_k141_171334             | 18685 | 22 | 0  | 5  | Low-quality | 31.21 |
| Sample_C2A_k141_274500             | 13678 | 16 | 4  | 2  | Low-quality | 31.21 |
| Sample_C4A_k141_5657               | 11062 | 16 | 8  | 0  | Low-quality | 31.2  |
| Sample_C3C_k141_130759             | 25487 | 19 | 0  | 12 | Low-quality | 31.19 |
| Sample_T8A_k141_91744              | 16560 | 23 | 3  | 0  | Low-quality | 31.19 |
| Sample_T15C_k141_30175_fragment_2  | 31204 | 51 | 6  | 0  | Low-quality | 31.18 |
| Sample_C13A_k141_7170              | 33710 | 30 | 3  | 3  | Low-quality | 31.17 |
| Sample_C6B_k141_51815              | 12585 | 20 | 16 | 0  | Low-quality | 31.14 |
| Sample_T5B_k141_61616              | 30704 | 27 | 0  | 13 | Low-quality | 31.13 |
| Sample_C12C_k141_72253_fragment_2  | 12906 | 14 | 4  | 1  | Low-quality | 31.12 |
| Sample_C9C_k141_3116               | 12583 | 17 | 0  | 0  | Low-quality | 31.1  |
| Sample_T4B_k141_73313              | 52095 | 53 | 1  | 26 | Low-quality | 31.09 |
| Sample_C2A_k141_323696             | 21210 | 10 | 0  | 2  | Low-quality | 31.08 |
| Sample_C2C_k141_261051             | 27759 | 33 | 1  | 8  | Low-quality | 31.08 |
| Sample_T5A_k141_17986              | 20512 | 17 | 1  | 2  | Low-quality | 31.04 |
| Sample_C2B_k141_217559             | 28635 | 51 | 8  | 1  | Low-quality | 31.04 |
| Sample_T8C_k141_70755              | 17307 | 29 | 0  | 1  | Low-quality | 31.04 |
| Sample_C12B_k141_163095            | 14656 | 20 | 12 | 0  | Low-quality | 31.03 |
| Sample_C14A_k141_231849_fragment_2 | 12144 | 18 | 6  | 0  | Low-quality | 31.03 |
| Sample_C11A_k141_163858            | 13227 | 20 | 0  | 0  | Low-quality | 31.02 |
| Sample_T7A_k141_188517             | 48335 | 41 | 1  | 14 | Low-quality | 30.97 |
| Sample_T2C_k141_156702             | 13541 | 32 | 5  | 0  | Low-quality | 30.97 |
| Sample_T8C_k141_114753_fragment_1  | 27875 | 30 | 2  | 1  | Low-quality | 30.97 |
| Sample_C13B_k141_88000             | 75207 | 79 | 1  | 12 | Low-quality | 30.96 |
| Sample_C9C_k141_101762             | 17778 | 21 | 0  | 3  | Low-quality | 30.96 |
| Sample_T2B_k141_141069             | 17311 | 24 | 1  | 6  | Low-quality | 30.96 |
| Sample_C2A_k141_270489             | 14063 | 38 | 9  | 0  | Low-quality | 30.96 |
| Sample_T2A_k141_76147              | 16708 | 35 | 7  | 0  | Low-quality | 30.96 |
| Sample_T8A_k141_177403             | 10765 | 15 | 7  | 0  | Low-quality | 30.96 |
| Sample_T6A_k141_190285             | 15849 | 19 | 0  | 3  | Low-quality | 30.95 |
| Sample_C14A_k141_12744             | 67228 | 83 | 4  | 4  | Low-quality | 30.95 |
| Sample_T16B_k141_143591            | 12656 | 21 | 8  | 0  | Low-quality | 30.95 |
| Sample_T5B_k141_61288              | 18217 | 16 | 1  | 1  | Low-quality | 30.95 |

|                                    |       |    |    |    |             |       |
|------------------------------------|-------|----|----|----|-------------|-------|
| Sample_T5C_k141_139527             | 13724 | 17 | 15 | 0  | Low-quality | 30.95 |
| Sample_C5B_k141_2995               | 16237 | 11 | 1  | 1  | Low-quality | 30.91 |
| Sample_T15C_k141_115306            | 32428 | 67 | 11 | 3  | Low-quality | 30.91 |
| Sample_C8A_k141_104521             | 73460 | 82 | 1  | 30 | Low-quality | 30.89 |
| Sample_C3A_k141_110936             | 11031 | 11 | 6  | 0  | Low-quality | 30.88 |
| Sample_C3A_k141_53051              | 14534 | 22 | 5  | 0  | Low-quality | 30.87 |
| Sample_T8C_k141_120079_fragment_2  | 12246 | 13 | 3  | 2  | Low-quality | 30.84 |
| Sample_C13B_k141_21620             | 25520 | 34 | 2  | 8  | Low-quality | 30.83 |
| Sample_C5A_k141_87501              | 18019 | 29 | 6  | 0  | Low-quality | 30.82 |
| Sample_T17A_k141_27306             | 27161 | 14 | 1  | 4  | Low-quality | 30.8  |
| Sample_C8A_k141_4629               | 49658 | 52 | 2  | 11 | Low-quality | 30.79 |
| Sample_C11C_k141_39722             | 18084 | 25 | 5  | 1  | Low-quality | 30.76 |
| Sample_T4B_k141_101303             | 55730 | 54 | 1  | 25 | Low-quality | 30.75 |
| Sample_T11C_k141_47323_fragment_1  | 15032 | 12 | 0  | 2  | Low-quality | 30.75 |
| Sample_C6A_k141_111311             | 8814  | 12 | 3  | 0  | Low-quality | 30.73 |
| Sample_T13B_k141_159519_fragment_1 | 12765 | 12 | 3  | 2  | Low-quality | 30.72 |
| Sample_C13A_k141_7377              | 26254 | 40 | 8  | 1  | Low-quality | 30.7  |
| Sample_T11B_k141_140929            | 15232 | 17 | 1  | 1  | Low-quality | 30.69 |
| Sample_T15B_k141_66870             | 16688 | 7  | 2  | 0  | Low-quality | 30.69 |
| Sample_T16C_k141_98167             | 13967 | 21 | 6  | 0  | Low-quality | 30.66 |
| Sample_C12A_k141_79918             | 17970 | 27 | 6  | 0  | Low-quality | 30.65 |
| Sample_C2C_k141_41261              | 47810 | 52 | 2  | 7  | Low-quality | 30.63 |
| Sample_C6A_k141_197687_fragment_1  | 14358 | 11 | 1  | 0  | Low-quality | 30.62 |
| Sample_T2C_k141_119643             | 11516 | 16 | 2  | 1  | Low-quality | 30.62 |
| Sample_C8A_k141_1393               | 17216 | 14 | 3  | 1  | Low-quality | 30.6  |
| Sample_T15C_k141_91106             | 23428 | 25 | 0  | 12 | Low-quality | 30.59 |
| Sample_C8B_k141_47618              | 50304 | 64 | 3  | 25 | Low-quality | 30.58 |
| Sample_C2B_k141_87666              | 12541 | 18 | 11 | 0  | Low-quality | 30.58 |
| Sample_T6B_k141_4695               | 11007 | 12 | 3  | 0  | Low-quality | 30.58 |
| Sample_T7A_k141_15235_fragment_1   | 16428 | 20 | 6  | 2  | Low-quality | 30.58 |
| Sample_C12C_k141_87616             | 65117 | 70 | 4  | 16 | Low-quality | 30.57 |
| Sample_C6C_k141_70137              | 23915 | 30 | 2  | 17 | Low-quality | 30.57 |
| Sample_C4A_k141_11562_fragment_1   | 12654 | 17 | 3  | 0  | Low-quality | 30.56 |
| Sample_T3A_k141_4237               | 11368 | 21 | 7  | 0  | Low-quality | 30.54 |
| Sample_T5B_k141_42227              | 19518 | 29 | 8  | 1  | Low-quality | 30.53 |
| Sample_C8C_k141_115296             | 12321 | 19 | 4  | 1  | Low-quality | 30.51 |
| Sample_C11A_k141_187118            | 13019 | 14 | 2  | 1  | Low-quality | 30.51 |
| Sample_T6B_k141_144618             | 29218 | 32 | 0  | 6  | Low-quality | 30.49 |
| Sample_C4C_k141_168223             | 18157 | 32 | 5  | 1  | Low-quality | 30.48 |

|                                    |       |    |    |    |             |       |
|------------------------------------|-------|----|----|----|-------------|-------|
| Sample_T4C_k141_53877              | 56187 | 57 | 1  | 17 | Low-quality | 30.47 |
| Sample_C8B_k141_122484             | 9980  | 17 | 4  | 0  | Low-quality | 30.47 |
| Sample_T6A_k141_213273             | 16904 | 21 | 9  | 0  | Low-quality | 30.47 |
| Sample_T8C_k141_100441             | 10075 | 20 | 4  | 0  | Low-quality | 30.46 |
| Sample_C10C_k141_22046             | 11784 | 22 | 10 | 1  | Low-quality | 30.44 |
| Sample_T6B_k141_81276              | 14590 | 18 | 10 | 1  | Low-quality | 30.41 |
| Sample_T6B_k141_17826              | 13841 | 21 | 5  | 0  | Low-quality | 30.39 |
| Sample_C4A_k141_77271              | 14812 | 22 | 11 | 1  | Low-quality | 30.38 |
| Sample_T15A_k141_149743            | 19071 | 9  | 2  | 2  | Low-quality | 30.37 |
| Sample_C11C_k141_181970            | 11967 | 15 | 5  | 0  | Low-quality | 30.37 |
| Sample_T7A_k141_206865             | 5306  | 7  | 3  | 0  | Low-quality | 30.37 |
| Sample_T4B_k141_166488             | 48961 | 53 | 1  | 22 | Low-quality | 30.36 |
| Sample_C12A_k141_161659            | 14070 | 19 | 7  | 1  | Low-quality | 30.36 |
| Sample_C12C_k141_13840_fragment_2  | 27306 | 36 | 6  | 3  | Low-quality | 30.35 |
| Sample_T13A_k141_53782             | 12581 | 27 | 2  | 0  | Low-quality | 30.35 |
| Sample_T11A_k141_58604             | 16534 | 13 | 0  | 3  | Low-quality | 30.34 |
| Sample_C12B_k141_23843             | 23171 | 20 | 5  | 2  | Low-quality | 30.33 |
| Sample_T8C_k141_160627             | 12757 | 9  | 2  | 0  | Low-quality | 30.29 |
| Sample_C3A_k141_23689              | 48970 | 57 | 1  | 14 | Low-quality | 30.28 |
| Sample_C1A_k141_216118             | 20007 | 26 | 1  | 7  | Low-quality | 30.27 |
| Sample_T12A_k141_198558            | 75103 | 66 | 1  | 42 | Low-quality | 30.27 |
| Sample_C1C_k141_7540               | 12172 | 16 | 12 | 0  | Low-quality | 30.27 |
| Sample_T8B_k141_15291_fragment_1   | 15778 | 20 | 12 | 1  | Low-quality | 30.26 |
| Sample_T11C_k141_153271            | 8916  | 13 | 1  | 0  | Low-quality | 30.25 |
| Sample_C4C_k141_105145             | 11892 | 26 | 3  | 0  | Low-quality | 30.24 |
| Sample_C13B_k141_81125             | 41965 | 43 | 1  | 11 | Low-quality | 30.23 |
| Sample_C2B_k141_321649_fragment_3  | 14056 | 14 | 0  | 3  | Low-quality | 30.23 |
| Sample_T18C_k141_69732             | 8673  | 9  | 3  | 0  | Low-quality | 30.23 |
| Sample_T2B_k141_126325             | 17596 | 18 | 3  | 0  | Low-quality | 30.22 |
| Sample_T8A_k141_105033             | 8671  | 11 | 3  | 0  | Low-quality | 30.22 |
| Sample_C7B_k141_4777               | 13075 | 22 | 7  | 1  | Low-quality | 30.18 |
| Sample_C2A_k141_191160             | 22846 | 29 | 18 | 3  | Low-quality | 30.17 |
| Sample_C12C_k141_121426_fragment_1 | 17429 | 28 | 7  | 4  | Low-quality | 30.11 |
| Sample_T2C_k141_28181              | 12729 | 24 | 4  | 0  | Low-quality | 30.09 |
| Sample_T14A_k141_152569            | 19110 | 18 | 0  | 7  | Low-quality | 30.07 |
| Sample_T10A_k141_114826            | 11649 | 20 | 12 | 0  | Low-quality | 30.05 |
| Sample_C8C_k141_83426              | 26422 | 23 | 0  | 7  | Low-quality | 30.04 |
| Sample_T6A_k141_94047              | 8501  | 12 | 0  | 0  | Low-quality | 30.04 |
| Sample_C5C_k141_15520              | 12610 | 13 | 9  | 0  | Low-quality | 30.04 |

|                                    |       |    |    |    |             |       |
|------------------------------------|-------|----|----|----|-------------|-------|
| Sample_T14B_k141_66024             | 19847 | 20 | 1  | 3  | Low-quality | 30.03 |
| Sample_T16B_k141_81670             | 10977 | 9  | 4  | 0  | Low-quality | 30.02 |
| Sample_C9A_k141_94696              | 14001 | 17 | 10 | 0  | Low-quality | 30.01 |
| Sample_T12A_k141_178504            | 10021 | 11 | 1  | 4  | Low-quality | 30    |
| Sample_C12A_k141_96389             | 10769 | 21 | 3  | 1  | Low-quality | 29.99 |
| Sample_T12C_k141_49291             | 13357 | 17 | 0  | 1  | Low-quality | 29.99 |
| Sample_T14A_k141_232959_fragment_2 | 14670 | 16 | 10 | 1  | Low-quality | 29.96 |
| Sample_T14B_k141_34194             | 10676 | 17 | 1  | 1  | Low-quality | 29.92 |
| Sample_C4C_k141_187377             | 15250 | 27 | 4  | 0  | Low-quality | 29.92 |
| Sample_T13B_k141_50310             | 11481 | 18 | 11 | 0  | Low-quality | 29.92 |
| Sample_T11C_k141_83978_fragment_1  | 15196 | 17 | 0  | 0  | Low-quality | 29.91 |
| Sample_T2A_k141_109026             | 11049 | 22 | 6  | 0  | Low-quality | 29.91 |
| Sample_C11C_k141_70397             | 26048 | 29 | 3  | 0  | Low-quality | 29.9  |
| Sample_T10A_k141_137934            | 11863 | 22 | 3  | 0  | Low-quality | 29.9  |
| Sample_T5A_k141_48338_fragment_1   | 12193 | 20 | 8  | 0  | Low-quality | 29.9  |
| Sample_C4B_k141_17051              | 11904 | 24 | 2  | 1  | Low-quality | 29.89 |
| Sample_T1B_k141_3271               | 19308 | 29 | 13 | 0  | Low-quality | 29.89 |
| Sample_C11A_k141_160798            | 81443 | 78 | 1  | 55 | Low-quality | 29.88 |
| Sample_T12C_k141_174032            | 12908 | 18 | 0  | 0  | Low-quality | 29.88 |
| Sample_T13C_k141_45263             | 10618 | 21 | 3  | 1  | Low-quality | 29.88 |
| Sample_C10A_k141_184681            | 26607 | 33 | 1  | 8  | Low-quality | 29.87 |
| Sample_T3C_k141_45673_fragment_1   | 12582 | 26 | 5  | 0  | Low-quality | 29.87 |
| Sample_C11B_k141_111750            | 83325 | 85 | 1  | 56 | Low-quality | 29.86 |
| Sample_C7A_k141_133732             | 8567  | 6  | 0  | 2  | Low-quality | 29.86 |
| Sample_C9A_k141_71878_fragment_1   | 17653 | 25 | 11 | 4  | Low-quality | 29.86 |
| Sample_T8B_k141_125867             | 22747 | 26 | 1  | 16 | Low-quality | 29.85 |
| Sample_T12A_k141_274537            | 13851 | 12 | 0  | 10 | Low-quality | 29.82 |
| Sample_C3A_k141_154718             | 44163 | 48 | 15 | 0  | Low-quality | 29.82 |
| Sample_C12C_k141_105184            | 12508 | 16 | 3  | 1  | Low-quality | 29.81 |
| Sample_C4C_k141_61420              | 25849 | 22 | 6  | 2  | Low-quality | 29.81 |
| Sample_C4A_k141_166777             | 17765 | 20 | 1  | 2  | Low-quality | 29.8  |
| Sample_C3A_k141_164179             | 12080 | 19 | 0  | 0  | Low-quality | 29.8  |
| Sample_T12B_k141_39135             | 11559 | 18 | 5  | 0  | Low-quality | 29.8  |
| Sample_T4B_k141_321471             | 11179 | 18 | 9  | 0  | Low-quality | 29.79 |
| Sample_C10B_k141_133614            | 11371 | 8  | 0  | 0  | Low-quality | 29.78 |
| Sample_C2C_k141_134711             | 26896 | 28 | 1  | 17 | Low-quality | 29.78 |
| Sample_T10C_k141_68435             | 22597 | 20 | 0  | 6  | Low-quality | 29.78 |
| Sample_T10B_k141_152484            | 39509 | 61 | 12 | 0  | Low-quality | 29.78 |
| Sample_T15A_k141_56003_fragment_2  | 60425 | 93 | 18 | 7  | Low-quality | 29.78 |

|                                   |       |    |    |    |             |       |
|-----------------------------------|-------|----|----|----|-------------|-------|
| Sample_T5A_k141_25235_fragment_1  | 24014 | 16 | 7  | 1  | Low-quality | 29.78 |
| Sample_T15B_k141_45835            | 22315 | 19 | 1  | 6  | Low-quality | 29.76 |
| Sample_C11C_k141_149286           | 10706 | 18 | 3  | 0  | Low-quality | 29.76 |
| Sample_T16B_k141_32254            | 36376 | 44 | 1  | 16 | Low-quality | 29.74 |
| Sample_T18A_k141_176287           | 11769 | 11 | 1  | 7  | Low-quality | 29.74 |
| Sample_T4B_k141_96417             | 12494 | 10 | 0  | 8  | Low-quality | 29.73 |
| Sample_C6B_k141_1265              | 17794 | 23 | 0  | 4  | Low-quality | 29.72 |
| Sample_C3C_k141_34042             | 23938 | 30 | 10 | 6  | Low-quality | 29.72 |
| Sample_C6C_k141_144156            | 17426 | 24 | 12 | 0  | Low-quality | 29.72 |
| Sample_C3C_k141_269835            | 8984  | 11 | 0  | 0  | Low-quality | 29.71 |
| Sample_C2B_k141_144072            | 13434 | 14 | 4  | 0  | Low-quality | 29.71 |
| Sample_T6C_k141_176492            | 11088 | 17 | 5  | 0  | Low-quality | 29.71 |
| Sample_T17A_k141_6722_fragment_1  | 15476 | 21 | 1  | 2  | Low-quality | 29.69 |
| Sample_T11B_k141_160938           | 10625 | 20 | 2  | 1  | Low-quality | 29.66 |
| Sample_C7B_k141_25723             | 54635 | 44 | 1  | 28 | Low-quality | 29.63 |
| Sample_T18A_k141_130510           | 12082 | 11 | 3  | 0  | Low-quality | 29.63 |
| Sample_T7A_k141_173988            | 18148 | 32 | 6  | 1  | Low-quality | 29.62 |
| Sample_C4A_k141_41239             | 13760 | 13 | 0  | 1  | Low-quality | 29.6  |
| Sample_C11B_k141_182116           | 11046 | 18 | 8  | 0  | Low-quality | 29.56 |
| Sample_C12C_k141_77235_fragment_2 | 11397 | 14 | 3  | 1  | Low-quality | 29.56 |
| Sample_T2B_k141_99989             | 13414 | 26 | 5  | 0  | Low-quality | 29.55 |
| Sample_C1C_k141_157143            | 23757 | 37 | 2  | 9  | Low-quality | 29.52 |
| Sample_T7A_k141_99989             | 25580 | 35 | 1  | 9  | Low-quality | 29.52 |
| Sample_C12B_k141_190568           | 19502 | 23 | 1  | 6  | Low-quality | 29.51 |
| Sample_T11B_k141_5923             | 18152 | 14 | 1  | 3  | Low-quality | 29.51 |
| Sample_C10A_k141_98475            | 19323 | 13 | 2  | 2  | Low-quality | 29.48 |
| Sample_T18C_k141_870_fragment_1   | 26034 | 54 | 7  | 1  | Low-quality | 29.48 |
| Sample_C6C_k141_45512             | 19377 | 30 | 4  | 3  | Low-quality | 29.47 |
| Sample_C11A_k141_66389_fragment_1 | 12623 | 15 | 1  | 2  | Low-quality | 29.47 |
| Sample_T5C_k141_35368             | 16294 | 25 | 1  | 1  | Low-quality | 29.47 |
| Sample_C5C_k141_2801              | 12381 | 11 | 0  | 5  | Low-quality | 29.46 |
| Sample_T5C_k141_69404             | 10405 | 8  | 3  | 0  | Low-quality | 29.46 |
| Sample_C4B_k141_7085              | 11831 | 13 | 0  | 3  | Low-quality | 29.45 |
| Sample_C11A_k141_142292           | 11001 | 20 | 5  | 0  | Low-quality | 29.44 |
| Sample_T8B_k141_266377            | 19442 | 23 | 1  | 11 | Low-quality | 29.42 |
| Sample_T5A_k141_49578             | 46867 | 49 | 4  | 11 | Low-quality | 29.41 |
| Sample_C6C_k141_37072             | 10725 | 13 | 9  | 0  | Low-quality | 29.41 |
| Sample_C11C_k141_115027           | 15767 | 16 | 11 | 2  | Low-quality | 29.4  |
| Sample_T4B_k141_158219            | 12492 | 18 | 7  | 0  | Low-quality | 29.39 |



|                                    |       |    |    |    |             |       |
|------------------------------------|-------|----|----|----|-------------|-------|
| Sample_T4C_k141_32542              | 17351 | 21 | 7  | 0  | Low-quality | 29.39 |
| Sample_T5A_k141_21932              | 10246 | 18 | 6  | 0  | Low-quality | 29.39 |
| Sample_T16C_k141_54749             | 11396 | 26 | 9  | 1  | Low-quality | 29.38 |
| Sample_T8A_k141_119754             | 26161 | 28 | 1  | 4  | Low-quality | 29.37 |
| Sample_T10A_k141_122708            | 12261 | 29 | 5  | 1  | Low-quality | 29.37 |
| Sample_T13A_k141_104169            | 11899 | 13 | 9  | 0  | Low-quality | 29.37 |
| Sample_T18B_k141_93928             | 25403 | 22 | 1  | 5  | Low-quality | 29.36 |
| Sample_T10A_k141_112696            | 11645 | 11 | 4  | 0  | Low-quality | 29.36 |
| Sample_T6A_k141_200476             | 10428 | 19 | 6  | 0  | Low-quality | 29.35 |
| Sample_T8C_k141_109517             | 13541 | 16 | 8  | 0  | Low-quality | 29.31 |
| Sample_C3B_k141_218789             | 11219 | 16 | 14 | 0  | Low-quality | 29.3  |
| Sample_T6A_k141_34633              | 20616 | 20 | 0  | 14 | Low-quality | 29.28 |
| Sample_C3B_k141_277324             | 10310 | 17 | 13 | 0  | Low-quality | 29.26 |
| Sample_C10A_k141_258322_fragment_1 | 12968 | 16 | 7  | 0  | Low-quality | 29.23 |
| Sample_C10C_k141_5416              | 11184 | 4  | 0  | 0  | Low-quality | 29.2  |
| Sample_T15C_k141_94815             | 32058 | 26 | 1  | 6  | Low-quality | 29.19 |
| Sample_C12C_k141_100426            | 21494 | 23 | 8  | 2  | Low-quality | 29.17 |
| Sample_C11A_k141_128331            | 12546 | 15 | 0  | 3  | Low-quality | 29.16 |
| Sample_C6B_k141_63853              | 9972  | 14 | 7  | 1  | Low-quality | 29.16 |
| Sample_T4B_k141_214281             | 25261 | 30 | 1  | 10 | Low-quality | 29.15 |
| Sample_C2B_k141_317205             | 25860 | 38 | 2  | 2  | Low-quality | 29.14 |
| Sample_T15A_k141_98862             | 12446 | 8  | 0  | 3  | Low-quality | 29.14 |
| Sample_T11B_k141_112640            | 11122 | 25 | 3  | 0  | Low-quality | 29.14 |
| Sample_T3A_k141_3187               | 12241 | 24 | 0  | 23 | Low-quality | 29.13 |
| Sample_C13A_k141_109937            | 20276 | 17 | 1  | 4  | Low-quality | 29.12 |
| Sample_C9C_k141_80830              | 13246 | 17 | 2  | 0  | Low-quality | 29.12 |
| Sample_T11B_k141_118968            | 10279 | 17 | 4  | 1  | Low-quality | 29.12 |
| Sample_C11A_k141_8266              | 10950 | 16 | 11 | 0  | Low-quality | 29.11 |
| Sample_T3B_k141_170184             | 9806  | 15 | 6  | 0  | Low-quality | 29.1  |
| Sample_T10B_k141_93363             | 31110 | 32 | 2  | 0  | Low-quality | 29.09 |
| Sample_C4B_k141_211444_fragment_1  | 12874 | 26 | 4  | 1  | Low-quality | 29.06 |
| Sample_C5A_k141_48415              | 23008 | 36 | 5  | 1  | Low-quality | 29.06 |
| Sample_T5A_k141_36490              | 11545 | 15 | 8  | 0  | Low-quality | 29.06 |
| Sample_C11B_k141_138689            | 15193 | 24 | 13 | 0  | Low-quality | 29.05 |
| Sample_C2A_k141_173731             | 12737 | 20 | 3  | 0  | Low-quality | 29.05 |
| Sample_T12A_k141_141819            | 11075 | 14 | 8  | 0  | Low-quality | 29.05 |
| Sample_T13C_k141_73490             | 16632 | 16 | 0  | 5  | Low-quality | 29.04 |
| Sample_T15A_k141_85080             | 11054 | 19 | 6  | 0  | Low-quality | 29.03 |
| Sample_C3C_k141_265507             | 15443 | 8  | 0  | 2  | Low-quality | 29.02 |

|                                    |        |     |    |    |             |       |
|------------------------------------|--------|-----|----|----|-------------|-------|
| Sample_C12A_k141_108513            | 10437  | 18  | 1  | 1  | Low-quality | 29.02 |
| Sample_C10B_k141_42472             | 35697  | 36  | 1  | 7  | Low-quality | 29.01 |
| Sample_T7A_k141_11493              | 17369  | 22  | 1  | 3  | Low-quality | 29.01 |
| Sample_T13C_k141_27827             | 10109  | 16  | 5  | 0  | Low-quality | 29.01 |
| Sample_T11C_k141_118540            | 15478  | 19  | 0  | 2  | Low-quality | 29    |
| Sample_T6B_k141_20340              | 11720  | 16  | 0  | 4  | Low-quality | 28.99 |
| Sample_C3C_k141_147782             | 8317   | 10  | 3  | 0  | Low-quality | 28.99 |
| Sample_T3A_k141_68000              | 10776  | 12  | 1  | 4  | Low-quality | 28.98 |
| Sample_C5A_k141_31333              | 29874  | 43  | 9  | 0  | Low-quality | 28.98 |
| Sample_C3A_k141_184669             | 28726  | 21  | 0  | 7  | Low-quality | 28.95 |
| Sample_T8A_k141_232027             | 30769  | 33  | 7  | 0  | Low-quality | 28.94 |
| Sample_C9C_k141_43318              | 19097  | 18  | 2  | 3  | Low-quality | 28.93 |
| Sample_T5B_k141_42945              | 12153  | 5   | 0  | 3  | Low-quality | 28.92 |
| Sample_T11A_k141_103002            | 12145  | 12  | 0  | 12 | Low-quality | 28.9  |
| Sample_T15A_k141_96488             | 15973  | 30  | 0  | 0  | Low-quality | 28.9  |
| Sample_C2A_k141_155435_fragment_1  | 35547  | 27  | 6  | 0  | Low-quality | 28.89 |
| Sample_T8A_k141_125578             | 12452  | 12  | 0  | 0  | Low-quality | 28.88 |
| Sample_T11A_k141_8772              | 12688  | 20  | 0  | 7  | Low-quality | 28.87 |
| Sample_T3C_k141_14332              | 18016  | 19  | 2  | 0  | Low-quality | 28.87 |
| Sample_C3C_k141_143585             | 11188  | 16  | 8  | 0  | Low-quality | 28.86 |
| Sample_T11C_k141_153595_fragment_1 | 10206  | 22  | 4  | 1  | Low-quality | 28.86 |
| Sample_C6B_k141_46886              | 44583  | 43  | 1  | 32 | Low-quality | 28.85 |
| Sample_T18C_k141_81701             | 10546  | 10  | 0  | 3  | Low-quality | 28.85 |
| Sample_C5A_k141_204424             | 17795  | 22  | 18 | 0  | Low-quality | 28.83 |
| Sample_C3C_k141_249249             | 23391  | 21  | 1  | 8  | Low-quality | 28.82 |
| Sample_C4A_k141_15720_fragment_1   | 16116  | 26  | 1  | 2  | Low-quality | 28.82 |
| Sample_T8C_k141_154464             | 9000   | 19  | 3  | 0  | Low-quality | 28.82 |
| Sample_C3C_k141_141826             | 9284   | 10  | 7  | 0  | Low-quality | 28.79 |
| Sample_T12A_k141_182904            | 9551   | 12  | 4  | 0  | Low-quality | 28.76 |
| Sample_T7A_k141_30759_fragment_1   | 10468  | 21  | 9  | 0  | Low-quality | 28.76 |
| Sample_T17A_k141_22491             | 19000  | 24  | 1  | 6  | Low-quality | 28.75 |
| Sample_T12B_k141_126571            | 16352  | 25  | 4  | 3  | Low-quality | 28.75 |
| Sample_T6C_k141_221062             | 21306  | 31  | 9  | 9  | Low-quality | 28.72 |
| Sample_C9A_k141_118183             | 16003  | 15  | 0  | 5  | Low-quality | 28.7  |
| Sample_T3A_k141_66785              | 128286 | 126 | 11 | 56 | Low-quality | 28.7  |
| Sample_C12C_k141_169964_fragment_2 | 17063  | 21  | 9  | 0  | Low-quality | 28.7  |
| Sample_C10C_k141_190820            | 27023  | 23  | 8  | 3  | Low-quality | 28.68 |
| Sample_T2A_k141_62482              | 11157  | 27  | 8  | 0  | Low-quality | 28.68 |
| Sample_C6C_k141_206027             | 15548  | 14  | 1  | 10 | Low-quality | 28.67 |

|                                   |        |     |    |    |             |       |
|-----------------------------------|--------|-----|----|----|-------------|-------|
| Sample_C12A_k141_1787             | 23603  | 35  | 4  | 4  | Low-quality | 28.67 |
| Sample_T6C_k141_82876             | 10763  | 14  | 10 | 0  | Low-quality | 28.67 |
| Sample_C3C_k141_216221            | 10939  | 13  | 0  | 7  | Low-quality | 28.66 |
| Sample_C2B_k141_19531             | 10147  | 24  | 2  | 0  | Low-quality | 28.66 |
| Sample_T8C_k141_124666_fragment_1 | 12368  | 14  | 2  | 0  | Low-quality | 28.66 |
| Sample_C12B_k141_56340            | 155005 | 153 | 1  | 84 | Low-quality | 28.61 |
| Sample_C10A_k141_193547           | 56993  | 52  | 1  | 21 | Low-quality | 28.6  |
| Sample_T5B_k141_24400             | 11199  | 15  | 3  | 0  | Low-quality | 28.59 |
| Sample_C5A_k141_221994            | 23259  | 21  | 2  | 3  | Low-quality | 28.58 |
| Sample_C5C_k141_59984             | 8065   | 9   | 0  | 2  | Low-quality | 28.58 |
| Sample_T6A_k141_216640            | 54286  | 49  | 0  | 38 | Low-quality | 28.57 |
| Sample_T17A_k141_17991            | 14495  | 23  | 14 | 0  | Low-quality | 28.57 |
| Sample_T8C_k141_93941             | 9782   | 23  | 6  | 0  | Low-quality | 28.57 |
| Sample_C10C_k141_187139           | 37306  | 36  | 2  | 12 | Low-quality | 28.56 |
| Sample_C8B_k141_44187_fragment_1  | 17861  | 17  | 10 | 4  | Low-quality | 28.56 |
| Sample_T1A_k141_18058_fragment_1  | 11565  | 22  | 9  | 0  | Low-quality | 28.56 |
| Sample_T1A_k141_18080             | 12082  | 18  | 12 | 0  | Low-quality | 28.55 |
| Sample_C1B_k141_180830            | 13356  | 27  | 3  | 2  | Low-quality | 28.53 |
| Sample_T16C_k141_92461            | 11988  | 16  | 0  | 12 | Low-quality | 28.52 |
| Sample_T16C_k141_87505            | 18532  | 14  | 3  | 2  | Low-quality | 28.52 |
| Sample_C12C_k141_35673            | 20974  | 24  | 0  | 9  | Low-quality | 28.51 |
| Sample_C2C_k141_59827             | 22495  | 15  | 0  | 3  | Low-quality | 28.51 |
| Sample_C5A_k141_89094             | 17070  | 22  | 1  | 1  | Low-quality | 28.51 |
| Sample_C10B_k141_5638             | 17061  | 21  | 0  | 5  | Low-quality | 28.5  |
| Sample_C8A_k141_55344_fragment_1  | 17019  | 26  | 4  | 3  | Low-quality | 28.48 |
| Sample_T5A_k141_35000             | 11448  | 23  | 3  | 1  | Low-quality | 28.45 |
| Sample_C10C_k141_117413           | 23271  | 23  | 10 | 2  | Low-quality | 28.44 |
| Sample_T8A_k141_253946            | 12097  | 18  | 9  | 0  | Low-quality | 28.44 |
| Sample_T10A_k141_121355           | 10817  | 12  | 3  | 0  | Low-quality | 28.43 |
| Sample_C13C_k141_38693            | 14553  | 20  | 0  | 2  | Low-quality | 28.42 |
| Sample_T11A_k141_96771            | 45361  | 46  | 1  | 7  | Low-quality | 28.42 |
| Sample_C13A_k141_15538            | 11233  | 14  | 11 | 0  | Low-quality | 28.42 |
| Sample_C11A_k141_105896           | 20816  | 20  | 0  | 4  | Low-quality | 28.4  |
| Sample_C10C_k141_66229            | 12775  | 19  | 8  | 0  | Low-quality | 28.39 |
| Sample_C3A_k141_112087            | 10240  | 15  | 12 | 0  | Low-quality | 28.39 |
| Sample_T11C_k141_131974           | 28823  | 27  | 3  | 4  | Low-quality | 28.38 |
| Sample_C14A_k141_195363           | 13111  | 21  | 1  | 1  | Low-quality | 28.35 |
| Sample_C11A_k141_38792            | 16513  | 12  | 1  | 5  | Low-quality | 28.34 |
| Sample_C13B_k141_62488            | 13822  | 20  | 1  | 4  | Low-quality | 28.33 |

|                                   |        |     |    |     |             |       |
|-----------------------------------|--------|-----|----|-----|-------------|-------|
| Sample_T5B_k141_8431              | 17477  | 20  | 1  | 6   | Low-quality | 28.33 |
| Sample_T15A_k141_179915           | 10836  | 21  | 7  | 0   | Low-quality | 28.33 |
| Sample_C2B_k141_157053            | 9679   | 26  | 2  | 0   | Low-quality | 28.32 |
| Sample_C6B_k141_16100             | 12539  | 8   | 3  | 0   | Low-quality | 28.3  |
| Sample_C3C_k141_257346            | 10860  | 19  | 1  | 1   | Low-quality | 28.29 |
| Sample_C11C_k141_117245           | 9872   | 14  | 7  | 0   | Low-quality | 28.28 |
| Sample_C14B_k141_37670            | 16288  | 20  | 10 | 1   | Low-quality | 28.28 |
| Sample_T10B_k141_93412            | 5105   | 5   | 0  | 0   | Low-quality | 28.27 |
| Sample_C9A_k141_88246             | 11280  | 14  | 5  | 0   | Low-quality | 28.26 |
| Sample_C8A_k141_84827             | 154685 | 138 | 1  | 78  | Low-quality | 28.25 |
| Sample_C12A_k141_64577            | 11491  | 19  | 1  | 0   | Low-quality | 28.25 |
| Sample_C4B_k141_74342             | 10826  | 15  | 7  | 0   | Low-quality | 28.24 |
| Sample_T4B_k141_73986             | 27459  | 30  | 2  | 9   | Low-quality | 28.22 |
| Sample_C5C_k141_89603             | 10847  | 4   | 0  | 0   | Low-quality | 28.21 |
| Sample_T17B_k141_2956_fragment_1  | 78124  | 87  | 13 | 16  | Low-quality | 28.21 |
| Sample_T18B_k141_59164_fragment_1 | 10657  | 8   | 4  | 0   | Low-quality | 28.21 |
| Sample_T4B_k141_208329            | 11482  | 11  | 3  | 0   | Low-quality | 28.21 |
| Sample_C12B_k141_109721           | 10800  | 21  | 5  | 0   | Low-quality | 28.2  |
| Sample_T13C_k141_89677            | 20235  | 12  | 0  | 4   | Low-quality | 28.19 |
| Sample_T10A_k141_121179           | 12864  | 19  | 8  | 0   | Low-quality | 28.19 |
| Sample_C6B_k141_9856              | 69925  | 65  | 1  | 44  | Low-quality | 28.18 |
| Sample_T10A_k141_57443            | 11843  | 22  | 3  | 3   | Low-quality | 28.17 |
| Sample_T11B_k141_70301            | 22761  | 26  | 1  | 8   | Low-quality | 28.17 |
| Sample_T8B_k141_163705            | 12268  | 26  | 6  | 3   | Low-quality | 28.17 |
| Sample_T4A_k141_79761             | 13254  | 17  | 9  | 1   | Low-quality | 28.17 |
| Sample_T15C_k141_107380           | 15766  | 21  | 5  | 0   | Low-quality | 28.16 |
| Sample_T6B_k141_188872            | 11995  | 18  | 0  | 2   | Low-quality | 28.15 |
| Sample_C6B_k141_109278            | 18590  | 25  | 1  | 8   | Low-quality | 28.13 |
| Sample_T2B_k141_263327            | 240495 | 238 | 2  | 161 | Low-quality | 28.13 |
| Sample_C2B_k141_106640            | 10475  | 13  | 11 | 0   | Low-quality | 28.13 |
| Sample_T10A_k141_162214           | 23123  | 28  | 9  | 0   | Low-quality | 28.13 |
| Sample_T10A_k141_10663            | 11246  | 15  | 9  | 0   | Low-quality | 28.12 |
| Sample_T5B_k141_49202             | 8061   | 8   | 0  | 2   | Low-quality | 28.1  |
| Sample_T8C_k141_27844             | 11128  | 13  | 11 | 0   | Low-quality | 28.09 |
| Sample_C8C_k141_58665             | 10769  | 8   | 0  | 3   | Low-quality | 28.07 |
| Sample_C2B_k141_325329            | 25902  | 32  | 8  | 1   | Low-quality | 28.07 |
| Sample_T5C_k141_8829_fragment_1   | 15838  | 15  | 0  | 1   | Low-quality | 28.06 |
| Sample_T8A_k141_30102             | 15717  | 23  | 2  | 1   | Low-quality | 28.05 |
| Sample_C1B_k141_12132             | 21943  | 17  | 0  | 5   | Low-quality | 28.04 |

|                                   |        |     |    |    |             |       |
|-----------------------------------|--------|-----|----|----|-------------|-------|
| Sample_T5A_k141_55034_fragment_3  | 15940  | 17  | 2  | 2  | Low-quality | 28.04 |
| Sample_C10B_k141_161765           | 13620  | 20  | 0  | 4  | Low-quality | 28.03 |
| Sample_C2A_k141_231114            | 9464   | 12  | 8  | 0  | Low-quality | 28.03 |
| Sample_C2C_k141_286773            | 36551  | 34  | 1  | 20 | Low-quality | 28.01 |
| Sample_T7B_k141_105499            | 13113  | 15  | 8  | 0  | Low-quality | 28.01 |
| Sample_T6A_k141_11545             | 23177  | 28  | 2  | 5  | Low-quality | 28    |
| Sample_C6A_k141_54130             | 13187  | 20  | 2  | 1  | Low-quality | 28    |
| Sample_C3B_k141_175637            | 51614  | 44  | 1  | 9  | Low-quality | 27.99 |
| Sample_T2C_k141_10155             | 12564  | 21  | 2  | 1  | Low-quality | 27.99 |
| Sample_T8C_k141_64540             | 12923  | 15  | 8  | 0  | Low-quality | 27.98 |
| Sample_C10A_k141_269818           | 10307  | 14  | 6  | 0  | Low-quality | 27.97 |
| Sample_C13C_k141_90156            | 35894  | 34  | 0  | 29 | Low-quality | 27.96 |
| Sample_T7A_k141_133501            | 18711  | 19  | 5  | 2  | Low-quality | 27.96 |
| Sample_C4C_k141_266366            | 85796  | 93  | 1  | 11 | Low-quality | 27.95 |
| Sample_T12B_k141_24644_fragment_1 | 21669  | 31  | 7  | 3  | Low-quality | 27.95 |
| Sample_T4B_k141_202926_fragment_1 | 24895  | 24  | 1  | 1  | Low-quality | 27.95 |
| Sample_T3B_k141_10517             | 14308  | 18  | 0  | 1  | Low-quality | 27.94 |
| Sample_T15A_k141_89573            | 5418   | 10  | 3  | 0  | Low-quality | 27.93 |
| Sample_T10B_k141_132014           | 27500  | 23  | 0  | 15 | Low-quality | 27.91 |
| Sample_C3C_k141_212726            | 11080  | 19  | 6  | 1  | Low-quality | 27.9  |
| Sample_T2C_k141_86063             | 14019  | 10  | 0  | 4  | Low-quality | 27.9  |
| Sample_T4B_k141_87151_fragment_1  | 50415  | 55  | 14 | 1  | Low-quality | 27.89 |
| Sample_T1A_k141_40852             | 13966  | 22  | 5  | 3  | Low-quality | 27.88 |
| Sample_C4B_k141_81229_fragment_1  | 11287  | 18  | 5  | 0  | Low-quality | 27.87 |
| Sample_T12B_k141_55728            | 15534  | 11  | 0  | 5  | Low-quality | 27.86 |
| Sample_C10B_k141_153616           | 30576  | 28  | 1  | 10 | Low-quality | 27.84 |
| Sample_C12A_k141_210095           | 9706   | 15  | 7  | 0  | Low-quality | 27.84 |
| Sample_C3C_k141_226940            | 11714  | 8   | 0  | 3  | Low-quality | 27.82 |
| Sample_C12C_k141_1385             | 12903  | 11  | 1  | 2  | Low-quality | 27.81 |
| Sample_C5A_k141_40767             | 150551 | 143 | 1  | 80 | Low-quality | 27.79 |
| Sample_T4B_k141_155194            | 48063  | 40  | 1  | 24 | Low-quality | 27.79 |
| Sample_C10B_k141_105714           | 15398  | 26  | 1  | 1  | Low-quality | 27.78 |
| Sample_C3C_k141_198476            | 14167  | 21  | 6  | 1  | Low-quality | 27.78 |
| Sample_T7A_k141_75924             | 16418  | 26  | 5  | 0  | Low-quality | 27.77 |
| Sample_T6A_k141_35854             | 9626   | 4   | 0  | 1  | Low-quality | 27.76 |
| Sample_T8B_k141_214476            | 21276  | 28  | 1  | 8  | Low-quality | 27.76 |
| Sample_C11C_k141_174699           | 10395  | 12  | 8  | 0  | Low-quality | 27.76 |
| Sample_C12C_k141_224133           | 12529  | 18  | 4  | 0  | Low-quality | 27.76 |
| Sample_T4B_k141_86319             | 10114  | 24  | 5  | 0  | Low-quality | 27.75 |

|                                   |       |    |    |    |             |       |
|-----------------------------------|-------|----|----|----|-------------|-------|
| Sample_C6B_k141_74095             | 10263 | 13 | 0  | 0  | Low-quality | 27.73 |
| Sample_T6A_k141_207743            | 10544 | 13 | 0  | 3  | Low-quality | 27.72 |
| Sample_T7A_k141_150726            | 10568 | 12 | 2  | 1  | Low-quality | 27.72 |
| Sample_C7A_k141_38668             | 10476 | 22 | 2  | 0  | Low-quality | 27.72 |
| Sample_C14B_k141_98371            | 20890 | 25 | 2  | 6  | Low-quality | 27.69 |
| Sample_C1A_k141_152935_fragment_3 | 10907 | 19 | 2  | 0  | Low-quality | 27.69 |
| Sample_T11C_k141_54784            | 11733 | 18 | 5  | 0  | Low-quality | 27.69 |
| Sample_T5A_k141_29596             | 11554 | 22 | 4  | 2  | Low-quality | 27.68 |
| Sample_C8B_k141_164391            | 13338 | 16 | 0  | 2  | Low-quality | 27.67 |
| Sample_T17B_k141_9762             | 24921 | 21 | 5  | 0  | Low-quality | 27.67 |
| Sample_T4B_k141_102245            | 11203 | 15 | 3  | 0  | Low-quality | 27.67 |
| Sample_T18C_k141_18333            | 16189 | 28 | 9  | 3  | Low-quality | 27.66 |
| Sample_T4B_k141_203269_fragment_1 | 51865 | 85 | 13 | 3  | Low-quality | 27.66 |
| Sample_T5C_k141_149558            | 22342 | 27 | 1  | 6  | Low-quality | 27.65 |
| Sample_C11B_k141_171985           | 21042 | 21 | 0  | 5  | Low-quality | 27.64 |
| Sample_C3B_k141_47266             | 8595  | 3  | 3  | 0  | Low-quality | 27.61 |
| Sample_T6B_k141_125738            | 17604 | 20 | 0  | 10 | Low-quality | 27.61 |
| Sample_C12C_k141_232893           | 18919 | 26 | 2  | 1  | Low-quality | 27.6  |
| Sample_T7C_k141_132078            | 14704 | 21 | 2  | 3  | Low-quality | 27.59 |
| Sample_C10C_k141_11990            | 10060 | 23 | 6  | 0  | Low-quality | 27.59 |
| Sample_T12A_k141_78502            | 9908  | 19 | 2  | 0  | Low-quality | 27.55 |
| Sample_T5C_k141_62248             | 11301 | 9  | 5  | 0  | Low-quality | 27.54 |
| Sample_C14A_k141_24156            | 12216 | 20 | 3  | 0  | Low-quality | 27.53 |
| Sample_C2A_k141_146808            | 23858 | 21 | 1  | 10 | Low-quality | 27.53 |
| Sample_T7A_k141_676               | 41090 | 39 | 1  | 20 | Low-quality | 27.53 |
| Sample_T2B_k141_32051             | 13061 | 19 | 14 | 0  | Low-quality | 27.53 |
| Sample_T7A_k141_14540             | 25151 | 20 | 1  | 11 | Low-quality | 27.52 |
| Sample_C4B_k141_214007            | 10526 | 13 | 5  | 0  | Low-quality | 27.5  |
| Sample_C2C_k141_17348             | 32207 | 34 | 0  | 16 | Low-quality | 27.49 |
| Sample_C9A_k141_68765             | 16459 | 19 | 0  | 3  | Low-quality | 27.49 |
| Sample_T13B_k141_99505            | 22213 | 39 | 1  | 2  | Low-quality | 27.49 |
| Sample_T8B_k141_52469             | 21591 | 11 | 0  | 3  | Low-quality | 27.48 |
| Sample_T11B_k141_14420            | 11553 | 8  | 0  | 6  | Low-quality | 27.46 |
| Sample_T2A_k141_247987            | 11793 | 17 | 6  | 0  | Low-quality | 27.46 |
| Sample_T10B_k141_172725           | 9519  | 5  | 0  | 1  | Low-quality | 27.45 |
| Sample_T5B_k141_6767              | 10635 | 20 | 2  | 0  | Low-quality | 27.45 |
| Sample_C14C_k141_84102            | 12757 | 14 | 0  | 3  | Low-quality | 27.44 |
| Sample_C3C_k141_202818            | 8909  | 16 | 7  | 0  | Low-quality | 27.44 |
| Sample_C6B_k141_105384            | 12449 | 12 | 4  | 0  | Low-quality | 27.44 |

|                                    |       |    |    |    |             |       |
|------------------------------------|-------|----|----|----|-------------|-------|
| Sample_T2C_k141_122773             | 21081 | 21 | 0  | 2  | Low-quality | 27.43 |
| Sample_T3A_k141_105321             | 16421 | 22 | 1  | 4  | Low-quality | 27.43 |
| Sample_T7A_k141_55858              | 50581 | 41 | 1  | 10 | Low-quality | 27.43 |
| Sample_T2A_k141_45744_fragment_1   | 11776 | 12 | 1  | 0  | Low-quality | 27.42 |
| Sample_T6C_k141_166631_fragment_1  | 10335 | 8  | 2  | 0  | Low-quality | 27.42 |
| Sample_C14B_k141_45091             | 11201 | 19 | 10 | 0  | Low-quality | 27.39 |
| Sample_T17C_k141_20955             | 11442 | 16 | 11 | 0  | Low-quality | 27.39 |
| Sample_C8B_k141_28940              | 50476 | 50 | 1  | 17 | Low-quality | 27.38 |
| Sample_T12A_k141_280062            | 14972 | 20 | 1  | 2  | Low-quality | 27.38 |
| Sample_T12A_k141_241952            | 9781  | 17 | 6  | 1  | Low-quality | 27.38 |
| Sample_T12A_k141_287926_fragment_2 | 43631 | 37 | 13 | 1  | Low-quality | 27.37 |
| Sample_C10A_k141_278829            | 9674  | 20 | 1  | 0  | Low-quality | 27.36 |
| Sample_T11B_k141_124756            | 22372 | 32 | 3  | 7  | Low-quality | 27.32 |
| Sample_T12B_k141_135256            | 19339 | 17 | 0  | 3  | Low-quality | 27.31 |
| Sample_C10A_k141_56083             | 12678 | 16 | 12 | 0  | Low-quality | 27.3  |
| Sample_C4A_k141_10275              | 29009 | 32 | 4  | 0  | Low-quality | 27.3  |
| Sample_T11C_k141_24267             | 19004 | 16 | 1  | 6  | Low-quality | 27.29 |
| Sample_C2C_k141_171037_fragment_2  | 12982 | 16 | 7  | 0  | Low-quality | 27.29 |
| Sample_C12A_k141_49930             | 10651 | 16 | 4  | 0  | Low-quality | 27.27 |
| Sample_T8C_k141_17789              | 15156 | 25 | 4  | 0  | Low-quality | 27.27 |
| Sample_C5A_k141_71118              | 25208 | 18 | 1  | 0  | Low-quality | 27.25 |
| Sample_T6B_k141_63828              | 10194 | 12 | 1  | 0  | Low-quality | 27.24 |
| Sample_C5A_k141_261759_fragment_2  | 10992 | 15 | 2  | 1  | Low-quality | 27.23 |
| Sample_T1B_k141_19284              | 16293 | 17 | 0  | 1  | Low-quality | 27.21 |
| Sample_C4C_k141_87890              | 46134 | 43 | 11 | 8  | Low-quality | 27.21 |
| Sample_T14B_k141_3145              | 12671 | 18 | 9  | 0  | Low-quality | 27.21 |
| Sample_T8B_k141_273011             | 12482 | 17 | 16 | 0  | Low-quality | 27.21 |
| Sample_C3A_k141_257244             | 11773 | 6  | 0  | 0  | Low-quality | 27.19 |
| Sample_T12B_k141_17215             | 25817 | 17 | 0  | 10 | Low-quality | 27.19 |
| Sample_C3C_k141_65020_fragment_2   | 29413 | 26 | 9  | 3  | Low-quality | 27.18 |
| Sample_T4B_k141_77653              | 25075 | 31 | 15 | 0  | Low-quality | 27.18 |
| Sample_C3B_k141_47636              | 23513 | 16 | 1  | 10 | Low-quality | 27.17 |
| Sample_T4A_k141_24980              | 12457 | 22 | 2  | 0  | Low-quality | 27.17 |
| Sample_T16B_k141_17501_fragment_3  | 22320 | 26 | 1  | 4  | Low-quality | 27.15 |
| Sample_T1A_k141_29580              | 16670 | 33 | 6  | 0  | Low-quality | 27.14 |
| Sample_T8A_k141_138307             | 10386 | 14 | 7  | 0  | Low-quality | 27.14 |
| Sample_T11B_k141_38964             | 14370 | 19 | 0  | 3  | Low-quality | 27.13 |
| Sample_C5A_k141_213354             | 29926 | 37 | 1  | 18 | Low-quality | 27.12 |
| Sample_C7C_k141_79741              | 10492 | 19 | 3  | 0  | Low-quality | 27.12 |

|                                    |       |    |    |    |             |       |
|------------------------------------|-------|----|----|----|-------------|-------|
| Sample_T7B_k141_38747              | 10334 | 14 | 9  | 0  | Low-quality | 27.11 |
| Sample_T17B_k141_25153             | 15422 | 20 | 7  | 1  | Low-quality | 27.1  |
| Sample_T14A_k141_128825_fragment_1 | 35567 | 37 | 1  | 4  | Low-quality | 27.08 |
| Sample_T8A_k141_85283              | 16207 | 18 | 0  | 1  | Low-quality | 27.07 |
| Sample_C6B_k141_16707              | 11994 | 18 | 8  | 0  | Low-quality | 27.07 |
| Sample_T7B_k141_84802              | 14475 | 18 | 12 | 0  | Low-quality | 27.07 |
| Sample_C6C_k141_230909             | 10289 | 14 | 9  | 0  | Low-quality | 27.06 |
| Sample_T4B_k141_295280             | 41335 | 44 | 0  | 28 | Low-quality | 27.05 |
| Sample_C1C_k141_72601              | 10007 | 14 | 3  | 0  | Low-quality | 27.05 |
| Sample_T2B_k141_300985             | 11077 | 11 | 0  | 2  | Low-quality | 27.04 |
| Sample_C4C_k141_34362              | 12902 | 18 | 4  | 0  | Low-quality | 27.03 |
| Sample_C4A_k141_97556              | 23677 | 52 | 7  | 3  | Low-quality | 27.01 |
| Sample_C6C_k141_178224_fragment_1  | 33466 | 29 | 9  | 4  | Low-quality | 27.01 |
| Sample_T10B_k141_159432            | 17851 | 19 | 1  | 1  | Low-quality | 27.01 |
| Sample_T7A_k141_88222              | 6125  | 5  | 0  | 0  | Low-quality | 27    |
| Sample_C2B_k141_209646             | 10055 | 11 | 9  | 0  | Low-quality | 27    |
| Sample_T6C_k141_144045             | 10840 | 18 | 9  | 3  | Low-quality | 26.99 |
| Sample_T8C_k141_147089             | 9675  | 17 | 8  | 0  | Low-quality | 26.99 |
| Sample_C10A_k141_124524            | 10174 | 16 | 4  | 0  | Low-quality | 26.98 |
| Sample_T12B_k141_33855             | 11364 | 12 | 4  | 1  | Low-quality | 26.96 |
| Sample_T4B_k141_199658             | 24877 | 42 | 6  | 1  | Low-quality | 26.96 |
| Sample_T8B_k141_200842             | 12620 | 26 | 2  | 1  | Low-quality | 26.96 |
| Sample_C4A_k141_90094              | 16006 | 28 | 4  | 1  | Low-quality | 26.95 |
| Sample_T10B_k141_181384            | 14329 | 15 | 1  | 3  | Low-quality | 26.95 |
| Sample_T2C_k141_149009             | 15732 | 17 | 0  | 3  | Low-quality | 26.95 |
| Sample_T4B_k141_365019             | 29389 | 50 | 5  | 3  | Low-quality | 26.95 |
| Sample_C8B_k141_114079             | 15089 | 17 | 1  | 4  | Low-quality | 26.92 |
| Sample_C11A_k141_184931            | 10776 | 11 | 7  | 0  | Low-quality | 26.91 |
| Sample_C8C_k141_123048             | 9876  | 14 | 3  | 0  | Low-quality | 26.91 |
| Sample_T3B_k141_168477             | 13292 | 21 | 7  | 2  | Low-quality | 26.91 |
| Sample_T3C_k141_138243             | 11282 | 11 | 4  | 1  | Low-quality | 26.91 |
| Sample_T15A_k141_156308            | 15207 | 17 | 1  | 0  | Low-quality | 26.89 |
| Sample_C4B_k141_186812             | 14578 | 20 | 1  | 1  | Low-quality | 26.89 |
| Sample_C2C_k141_66874              | 16576 | 24 | 1  | 11 | Low-quality | 26.87 |
| Sample_T12A_k141_225977            | 12583 | 14 | 4  | 0  | Low-quality | 26.86 |
| Sample_C11B_k141_204329            | 21695 | 25 | 1  | 9  | Low-quality | 26.85 |
| Sample_T8C_k141_150802_fragment_1  | 14039 | 20 | 9  | 1  | Low-quality | 26.85 |
| Sample_C12C_k141_207127            | 11879 | 14 | 9  | 0  | Low-quality | 26.83 |
| Sample_C3C_k141_113531             | 15511 | 32 | 2  | 0  | Low-quality | 26.83 |



|                                    |        |     |    |    |             |       |
|------------------------------------|--------|-----|----|----|-------------|-------|
| Sample_T5C_k141_131369             | 21481  | 28  | 2  | 2  | Low-quality | 26.81 |
| Sample_T10B_k141_37607             | 9594   | 16  | 1  | 1  | Low-quality | 26.8  |
| Sample_T6C_k141_92747              | 28350  | 45  | 6  | 3  | Low-quality | 26.77 |
| Sample_T13B_k141_57317_fragment_1  | 14324  | 26  | 16 | 2  | Low-quality | 26.75 |
| Sample_T3A_k141_2793               | 9859   | 7   | 0  | 0  | Low-quality | 26.75 |
| Sample_T10A_k141_64087             | 12432  | 10  | 0  | 3  | Low-quality | 26.74 |
| Sample_C14A_k141_40347             | 16768  | 17  | 3  | 2  | Low-quality | 26.72 |
| Sample_C5B_k141_55388_fragment_1   | 14289  | 14  | 8  | 2  | Low-quality | 26.72 |
| Sample_T10B_k141_177810            | 35569  | 54  | 10 | 0  | Low-quality | 26.72 |
| Sample_C6A_k141_95852              | 23222  | 21  | 1  | 9  | Low-quality | 26.71 |
| Sample_T10A_k141_144074            | 91735  | 86  | 5  | 36 | Low-quality | 26.71 |
| Sample_T4C_k141_100062             | 46623  | 37  | 0  | 28 | Low-quality | 26.71 |
| Sample_C10A_k141_214316            | 9905   | 11  | 2  | 0  | Low-quality | 26.71 |
| Sample_T17B_k141_33551             | 11866  | 23  | 2  | 1  | Low-quality | 26.71 |
| Sample_T7C_k141_23480              | 10826  | 16  | 9  | 0  | Low-quality | 26.71 |
| Sample_T7B_k141_28374              | 10251  | 12  | 5  | 1  | Low-quality | 26.7  |
| Sample_C11C_k141_40171             | 14288  | 20  | 5  | 2  | Low-quality | 26.69 |
| Sample_C2C_k141_244458             | 11297  | 14  | 1  | 1  | Low-quality | 26.68 |
| Sample_C3A_k141_234415             | 7380   | 3   | 0  | 3  | Low-quality | 26.68 |
| Sample_T5A_k141_7337               | 54386  | 52  | 1  | 33 | Low-quality | 26.68 |
| Sample_C13B_k141_55231             | 10842  | 12  | 6  | 0  | Low-quality | 26.66 |
| Sample_T2C_k141_5729               | 14504  | 19  | 1  | 0  | Low-quality | 26.66 |
| Sample_C13C_k141_35439             | 27268  | 33  | 2  | 7  | Low-quality | 26.64 |
| Sample_C2B_k141_214522             | 17608  | 24  | 1  | 5  | Low-quality | 26.64 |
| Sample_C6B_k141_190792             | 11196  | 13  | 0  | 11 | Low-quality | 26.64 |
| Sample_T15C_k141_30428             | 21364  | 30  | 12 | 0  | Low-quality | 26.64 |
| Sample_C3C_k141_182647             | 14995  | 15  | 6  | 1  | Low-quality | 26.63 |
| Sample_C8A_k141_59965              | 13011  | 14  | 0  | 2  | Low-quality | 26.62 |
| Sample_T15A_k141_65717             | 26788  | 24  | 0  | 5  | Low-quality | 26.62 |
| Sample_T7B_k141_80253              | 41039  | 50  | 3  | 7  | Low-quality | 26.61 |
| Sample_C5A_k141_27125              | 14591  | 7   | 0  | 6  | Low-quality | 26.6  |
| Sample_T2C_k141_197058             | 145582 | 120 | 1  | 80 | Low-quality | 26.59 |
| Sample_T6B_k141_109202             | 24695  | 26  | 0  | 2  | Low-quality | 26.59 |
| Sample_C10A_k141_269580_fragment_2 | 10992  | 23  | 6  | 0  | Low-quality | 26.59 |
| Sample_C5B_k141_7132_fragment_1    | 12642  | 13  | 1  | 2  | Low-quality | 26.59 |
| Sample_T12A_k141_297701_fragment_1 | 11417  | 20  | 5  | 0  | Low-quality | 26.59 |
| Sample_C4A_k141_152345             | 9752   | 20  | 1  | 0  | Low-quality | 26.57 |
| Sample_C12B_k141_167400            | 10742  | 12  | 1  | 2  | Low-quality | 26.56 |
| Sample_T6B_k141_189662             | 9766   | 21  | 1  | 0  | Low-quality | 26.55 |

|                                    |        |     |    |     |             |       |
|------------------------------------|--------|-----|----|-----|-------------|-------|
| Sample_T14A_k141_84769             | 16480  | 20  | 16 | 1   | Low-quality | 26.54 |
| Sample_C3A_k141_117008             | 11059  | 12  | 3  | 0   | Low-quality | 26.53 |
| Sample_C4A_k141_94500              | 19808  | 23  | 16 | 4   | Low-quality | 26.53 |
| Sample_C11A_k141_84385             | 7950   | 9   | 2  | 0   | Low-quality | 26.52 |
| Sample_C10A_k141_210143            | 9831   | 16  | 5  | 0   | Low-quality | 26.51 |
| Sample_T6C_k141_50566              | 11089  | 9   | 1  | 0   | Low-quality | 26.5  |
| Sample_T11B_k141_49065             | 26712  | 21  | 1  | 13  | Low-quality | 26.49 |
| Sample_C4C_k141_85035              | 46361  | 48  | 1  | 27  | Low-quality | 26.48 |
| Sample_T10A_k141_39835             | 10384  | 15  | 8  | 0   | Low-quality | 26.48 |
| Sample_T10B_k141_122901            | 11413  | 26  | 6  | 0   | Low-quality | 26.48 |
| Sample_T14C_k141_123892            | 43831  | 42  | 4  | 2   | Low-quality | 26.48 |
| Sample_T2B_k141_232907_fragment_2  | 21830  | 30  | 5  | 4   | Low-quality | 26.48 |
| Sample_T3A_k141_63275              | 41940  | 32  | 1  | 24  | Low-quality | 26.46 |
| Sample_C14B_k141_26453_fragment_4  | 18408  | 17  | 3  | 2   | Low-quality | 26.46 |
| Sample_T5C_k141_98703_fragment_1   | 21617  | 23  | 2  | 4   | Low-quality | 26.45 |
| Sample_C1C_k141_234                | 8785   | 12  | 6  | 0   | Low-quality | 26.44 |
| Sample_C1C_k141_161391             | 12407  | 14  | 10 | 0   | Low-quality | 26.43 |
| Sample_C4A_k141_241454             | 10851  | 17  | 0  | 1   | Low-quality | 26.43 |
| Sample_T11A_k141_48888             | 11577  | 13  | 1  | 1   | Low-quality | 26.43 |
| Sample_T10B_k141_100629            | 12061  | 14  | 2  | 0   | Low-quality | 26.42 |
| Sample_C12C_k141_92138             | 12505  | 14  | 7  | 0   | Low-quality | 26.42 |
| Sample_T8B_k141_137002             | 20570  | 25  | 8  | 1   | Low-quality | 26.42 |
| Sample_C8C_k141_36563              | 10123  | 4   | 1  | 0   | Low-quality | 26.41 |
| Sample_T12B_k141_119183_fragment_1 | 21176  | 27  | 3  | 2   | Low-quality | 26.41 |
| Sample_T4B_k141_86374              | 9576   | 23  | 3  | 0   | Low-quality | 26.41 |
| Sample_T4B_k141_342991             | 9945   | 6   | 1  | 0   | Low-quality | 26.41 |
| Sample_T6C_k141_125274             | 9123   | 14  | 13 | 0   | Low-quality | 26.4  |
| Sample_C2C_k141_50169              | 276498 | 258 | 4  | 184 | Low-quality | 26.39 |
| Sample_C10C_k141_157624            | 10049  | 10  | 3  | 0   | Low-quality | 26.39 |
| Sample_C5A_k141_168826_fragment_1  | 20344  | 34  | 5  | 5   | Low-quality | 26.38 |
| Sample_T3A_k141_46747              | 10728  | 12  | 7  | 0   | Low-quality | 26.38 |
| Sample_C9A_k141_16393              | 20606  | 17  | 0  | 4   | Low-quality | 26.37 |
| Sample_T16C_k141_67155             | 66702  | 66  | 1  | 6   | Low-quality | 26.36 |
| Sample_T14C_k141_12302             | 9341   | 13  | 10 | 0   | Low-quality | 26.36 |
| Sample_T11A_k141_1418              | 57246  | 53  | 0  | 8   | Low-quality | 26.35 |
| Sample_T11C_k141_120272            | 17215  | 18  | 2  | 1   | Low-quality | 26.35 |
| Sample_T7B_k141_109345             | 11927  | 25  | 8  | 0   | Low-quality | 26.34 |
| Sample_T8C_k141_23092              | 23662  | 22  | 11 | 0   | Low-quality | 26.29 |
| Sample_C8C_k141_46147              | 14106  | 25  | 9  | 1   | Low-quality | 26.28 |

|                                   |       |     |    |    |             |       |
|-----------------------------------|-------|-----|----|----|-------------|-------|
| Sample_T8A_k141_31504             | 10462 | 13  | 0  | 2  | Low-quality | 26.26 |
| Sample_T8B_k141_94391             | 17199 | 32  | 1  | 3  | Low-quality | 26.25 |
| Sample_C4C_k141_258994            | 21201 | 30  | 1  | 5  | Low-quality | 26.24 |
| Sample_T6A_k141_65463             | 11268 | 11  | 1  | 6  | Low-quality | 26.23 |
| Sample_T8B_k141_20477             | 15405 | 14  | 0  | 2  | Low-quality | 26.23 |
| Sample_C14B_k141_70289            | 49966 | 103 | 10 | 3  | Low-quality | 26.23 |
| Sample_T4B_k141_249380            | 11646 | 29  | 5  | 0  | Low-quality | 26.22 |
| Sample_C5B_k141_29431             | 18868 | 29  | 8  | 0  | Low-quality | 26.21 |
| Sample_C14C_k141_27888            | 11852 | 18  | 6  | 0  | Low-quality | 26.2  |
| Sample_T6A_k141_220350            | 11271 | 12  | 1  | 0  | Low-quality | 26.2  |
| Sample_T6A_k141_49360             | 32622 | 50  | 3  | 0  | Low-quality | 26.19 |
| Sample_T14C_k141_161844           | 29902 | 28  | 1  | 9  | Low-quality | 26.17 |
| Sample_T4A_k141_90580             | 16722 | 20  | 0  | 3  | Low-quality | 26.16 |
| Sample_T10C_k141_20171            | 16481 | 14  | 1  | 0  | Low-quality | 26.16 |
| Sample_C12C_k141_76766            | 6237  | 8   | 2  | 3  | Low-quality | 26.15 |
| Sample_T13A_k141_99107            | 10986 | 20  | 0  | 20 | Low-quality | 26.14 |
| Sample_T15C_k141_989              | 30921 | 27  | 1  | 5  | Low-quality | 26.14 |
| Sample_C1C_k141_59692             | 17277 | 20  | 1  | 3  | Low-quality | 26.14 |
| Sample_T8B_k141_88378             | 14655 | 20  | 7  | 0  | Low-quality | 26.14 |
| Sample_T14A_k141_239031           | 53985 | 52  | 3  | 6  | Low-quality | 26.12 |
| Sample_C11B_k141_209669           | 15213 | 12  | 1  | 6  | Low-quality | 26.11 |
| Sample_T6B_k141_180533            | 14395 | 25  | 4  | 0  | Low-quality | 26.11 |
| Sample_C12A_k141_122909           | 10993 | 10  | 8  | 0  | Low-quality | 26.1  |
| Sample_C1C_k141_192900            | 12259 | 17  | 10 | 0  | Low-quality | 26.1  |
| Sample_C4A_k141_92192             | 27734 | 36  | 8  | 2  | Low-quality | 26.1  |
| Sample_C2A_k141_280836            | 9195  | 14  | 8  | 0  | Low-quality | 26.08 |
| Sample_T5B_k141_11336             | 35516 | 31  | 1  | 7  | Low-quality | 26.06 |
| Sample_C3C_k141_44700             | 15004 | 29  | 3  | 2  | Low-quality | 26.05 |
| Sample_T7C_k141_104954_fragment_1 | 63530 | 76  | 10 | 4  | Low-quality | 26.05 |
| Sample_C6B_k141_116841            | 9913  | 6   | 0  | 6  | Low-quality | 26.03 |
| Sample_T16B_k141_136039           | 11087 | 18  | 8  | 0  | Low-quality | 26.02 |
| Sample_C11A_k141_134573           | 61176 | 63  | 2  | 7  | Low-quality | 26.01 |
| Sample_C14C_k141_38734            | 9831  | 7   | 0  | 0  | Low-quality | 26.01 |
| Sample_T3A_k141_35243             | 15197 | 23  | 5  | 1  | Low-quality | 26.01 |
| Sample_C5C_k141_27539             | 12200 | 17  | 12 | 0  | Low-quality | 26    |
| Sample_T8A_k141_26156             | 15551 | 19  | 0  | 9  | Low-quality | 25.97 |
| Sample_C10C_k141_213679           | 31208 | 54  | 3  | 0  | Low-quality | 25.96 |
| Sample_T7B_k141_62226             | 11090 | 18  | 3  | 1  | Low-quality | 25.96 |
| Sample_C2C_k141_243359            | 14907 | 16  | 1  | 4  | Low-quality | 25.95 |

|                                    |        |    |    |    |             |       |
|------------------------------------|--------|----|----|----|-------------|-------|
| Sample_C6B_k141_52293              | 28394  | 29 | 1  | 23 | Low-quality | 25.94 |
| Sample_C10C_k141_126406            | 13799  | 26 | 5  | 0  | Low-quality | 25.94 |
| Sample_T12A_k141_337327            | 10133  | 15 | 5  | 0  | Low-quality | 25.94 |
| Sample_C13B_k141_73976_fragment_1  | 16301  | 23 | 2  | 0  | Low-quality | 25.93 |
| Sample_T8C_k141_188786             | 28719  | 40 | 4  | 2  | Low-quality | 25.93 |
| Sample_C4B_k141_150063             | 15090  | 19 | 0  | 6  | Low-quality | 25.92 |
| Sample_T10A_k141_47988             | 40062  | 36 | 1  | 31 | Low-quality | 25.92 |
| Sample_C5A_k141_140618             | 24585  | 18 | 2  | 4  | Low-quality | 25.91 |
| Sample_C8C_k141_113520             | 14154  | 18 | 0  | 2  | Low-quality | 25.91 |
| Sample_T5C_k141_27210              | 12411  | 16 | 10 | 0  | Low-quality | 25.91 |
| Sample_C12B_k141_80930             | 9092   | 14 | 7  | 0  | Low-quality | 25.9  |
| Sample_T5C_k141_157482             | 11091  | 25 | 8  | 0  | Low-quality | 25.89 |
| Sample_T7A_k141_144511             | 10590  | 21 | 1  | 1  | Low-quality | 25.88 |
| Sample_C11C_k141_87920             | 37047  | 30 | 4  | 10 | Low-quality | 25.87 |
| Sample_C2A_k141_279319             | 20852  | 48 | 7  | 1  | Low-quality | 25.86 |
| Sample_T11B_k141_58988             | 57591  | 43 | 7  | 20 | Low-quality | 25.85 |
| Sample_C11B_k141_6425              | 15081  | 21 | 9  | 3  | Low-quality | 25.85 |
| Sample_T18A_k141_118052            | 13842  | 16 | 5  | 1  | Low-quality | 25.84 |
| Sample_C3C_k141_203157             | 12254  | 23 | 6  | 0  | Low-quality | 25.83 |
| Sample_C2A_k141_80932              | 15459  | 16 | 0  | 2  | Low-quality | 25.82 |
| Sample_T18A_k141_85351             | 15698  | 14 | 2  | 1  | Low-quality | 25.82 |
| Sample_T14A_k141_12817             | 41596  | 44 | 2  | 9  | Low-quality | 25.79 |
| Sample_C4B_k141_195552_fragment_1  | 25991  | 32 | 8  | 4  | Low-quality | 25.79 |
| Sample_C10C_k141_127284            | 17038  | 21 | 1  | 2  | Low-quality | 25.78 |
| Sample_C12C_k141_145033            | 10337  | 14 | 2  | 1  | Low-quality | 25.78 |
| Sample_T13A_k141_88960             | 12737  | 24 | 4  | 0  | Low-quality | 25.78 |
| Sample_C8A_k141_20382              | 14088  | 22 | 11 | 1  | Low-quality | 25.76 |
| Sample_C8C_k141_60990              | 5374   | 4  | 1  | 0  | Low-quality | 25.76 |
| Sample_T2C_k141_161037             | 9726   | 14 | 8  | 0  | Low-quality | 25.76 |
| Sample_T18B_k141_51568             | 9253   | 12 | 1  | 0  | Low-quality | 25.73 |
| Sample_T14B_k141_156080_fragment_1 | 10774  | 16 | 3  | 1  | Low-quality | 25.71 |
| Sample_T15C_k141_120604            | 9397   | 13 | 0  | 0  | Low-quality | 25.71 |
| Sample_C9A_k141_55162              | 30038  | 26 | 4  | 5  | Low-quality | 25.7  |
| Sample_C11A_k141_8432              | 108858 | 98 | 2  | 61 | Low-quality | 25.69 |
| Sample_T12C_k141_58697             | 10470  | 23 | 3  | 0  | Low-quality | 25.69 |
| Sample_C11B_k141_228348            | 33498  | 37 | 1  | 8  | Low-quality | 25.67 |
| Sample_C12A_k141_18910             | 71604  | 59 | 1  | 37 | Low-quality | 25.66 |
| Sample_C1A_k141_107818             | 9882   | 10 | 5  | 0  | Low-quality | 25.66 |
| Sample_T15C_k141_138314            | 9268   | 16 | 1  | 2  | Low-quality | 25.66 |

|                                    |        |     |    |    |             |       |
|------------------------------------|--------|-----|----|----|-------------|-------|
| Sample_T4C_k141_60323_fragment_1   | 23092  | 21  | 4  | 2  | Low-quality | 25.66 |
| Sample_T13B_k141_95246             | 12996  | 28  | 3  | 0  | Low-quality | 25.65 |
| Sample_C14C_k141_105154            | 9626   | 18  | 5  | 0  | Low-quality | 25.64 |
| Sample_T8B_k141_196865_fragment_1  | 13858  | 23  | 2  | 2  | Low-quality | 25.64 |
| Sample_C4B_k141_54187              | 63540  | 51  | 1  | 34 | Low-quality | 25.61 |
| Sample_T16B_k141_41250             | 16570  | 17  | 7  | 0  | Low-quality | 25.6  |
| Sample_T8B_k141_45197              | 10951  | 11  | 0  | 0  | Low-quality | 25.6  |
| Sample_T18B_k141_18162             | 11827  | 16  | 2  | 0  | Low-quality | 25.58 |
| Sample_C9B_k141_91740              | 13964  | 20  | 6  | 0  | Low-quality | 25.57 |
| Sample_T18B_k141_28488             | 28452  | 33  | 11 | 6  | Low-quality | 25.57 |
| Sample_C1A_k141_159877             | 12455  | 14  | 5  | 0  | Low-quality | 25.55 |
| Sample_C1B_k141_60798              | 11698  | 20  | 5  | 0  | Low-quality | 25.54 |
| Sample_C6C_k141_162057             | 12357  | 15  | 8  | 2  | Low-quality | 25.54 |
| Sample_C14B_k141_23308             | 10100  | 15  | 5  | 0  | Low-quality | 25.52 |
| Sample_C3A_k141_255492             | 11234  | 14  | 5  | 0  | Low-quality | 25.52 |
| Sample_C3C_k141_154984_fragment_2  | 27672  | 44  | 2  | 2  | Low-quality | 25.51 |
| Sample_C6C_k141_88664              | 19966  | 18  | 0  | 5  | Low-quality | 25.5  |
| Sample_T2B_k141_178995             | 31998  | 28  | 0  | 20 | Low-quality | 25.5  |
| Sample_C8B_k141_86505              | 8017   | 8   | 0  | 1  | Low-quality | 25.5  |
| Sample_T6C_k141_191203             | 11955  | 17  | 7  | 0  | Low-quality | 25.5  |
| Sample_T14A_k141_154793_fragment_4 | 10565  | 10  | 4  | 0  | Low-quality | 25.48 |
| Sample_C6B_k141_110283             | 33674  | 30  | 1  | 22 | Low-quality | 25.45 |
| Sample_C3C_k141_96137              | 19620  | 14  | 0  | 2  | Low-quality | 25.44 |
| Sample_C2C_k141_128604             | 41611  | 68  | 9  | 4  | Low-quality | 25.44 |
| Sample_T6A_k141_204546             | 28523  | 22  | 0  | 17 | Low-quality | 25.42 |
| Sample_T16C_k141_93360             | 10241  | 19  | 7  | 0  | Low-quality | 25.4  |
| Sample_T11B_k141_161759            | 63013  | 56  | 1  | 48 | Low-quality | 25.39 |
| Sample_T14B_k141_82347             | 8987   | 13  | 7  | 0  | Low-quality | 25.39 |
| Sample_T2B_k141_145922             | 19952  | 23  | 9  | 3  | Low-quality | 25.39 |
| Sample_T8C_k141_146607             | 9621   | 18  | 5  | 0  | Low-quality | 25.39 |
| Sample_T6B_k141_143474             | 25251  | 20  | 0  | 17 | Low-quality | 25.37 |
| Sample_T7A_k141_82121              | 58765  | 79  | 4  | 22 | Low-quality | 25.37 |
| Sample_C6B_k141_50595              | 21956  | 16  | 1  | 5  | Low-quality | 25.36 |
| Sample_C9C_k141_42428              | 16754  | 19  | 1  | 5  | Low-quality | 25.35 |
| Sample_T10A_k141_176377            | 20987  | 19  | 1  | 5  | Low-quality | 25.32 |
| Sample_C10A_k141_287659            | 21472  | 18  | 1  | 7  | Low-quality | 25.31 |
| Sample_C11B_k141_109463            | 20447  | 27  | 1  | 7  | Low-quality | 25.31 |
| Sample_C4A_k141_88851              | 138562 | 113 | 1  | 74 | Low-quality | 25.31 |
| Sample_C4C_k141_223737             | 14765  | 16  | 1  | 2  | Low-quality | 25.31 |

|                                   |       |    |    |    |             |       |
|-----------------------------------|-------|----|----|----|-------------|-------|
| Sample_T8A_k141_26407             | 16363 | 22 | 2  | 2  | Low-quality | 25.31 |
| Sample_C7B_k141_50216             | 9299  | 24 | 4  | 0  | Low-quality | 25.3  |
| Sample_T10B_k141_23842            | 7259  | 9  | 3  | 0  | Low-quality | 25.3  |
| Sample_C13B_k141_56327            | 19079 | 16 | 0  | 5  | Low-quality | 25.29 |
| Sample_C2A_k141_101638            | 36084 | 34 | 0  | 22 | Low-quality | 25.29 |
| Sample_C10C_k141_214592           | 12719 | 14 | 0  | 1  | Low-quality | 25.29 |
| Sample_C5A_k141_79390             | 16710 | 24 | 1  | 3  | Low-quality | 25.28 |
| Sample_T8C_k141_55123             | 20062 | 15 | 0  | 2  | Low-quality | 25.28 |
| Sample_C3A_k141_146939            | 25372 | 45 | 6  | 0  | Low-quality | 25.26 |
| Sample_C8A_k141_18719             | 62631 | 52 | 1  | 38 | Low-quality | 25.24 |
| Sample_C8B_k141_186599_fragment_2 | 28224 | 38 | 6  | 7  | Low-quality | 25.2  |
| Sample_T3A_k141_72019             | 8375  | 10 | 0  | 9  | Low-quality | 25.19 |
| Sample_T3A_k141_37393             | 9337  | 17 | 1  | 1  | Low-quality | 25.19 |
| Sample_C10A_k141_53978            | 15340 | 18 | 6  | 0  | Low-quality | 25.19 |
| Sample_T14A_k141_215204           | 8978  | 20 | 6  | 0  | Low-quality | 25.19 |
| Sample_T16C_k141_18593            | 22740 | 19 | 1  | 8  | Low-quality | 25.18 |
| Sample_C13C_k141_25094            | 11840 | 14 | 9  | 0  | Low-quality | 25.18 |
| Sample_T5B_k141_67344             | 9440  | 17 | 4  | 0  | Low-quality | 25.18 |
| Sample_C8A_k141_1266              | 10396 | 18 | 3  | 0  | Low-quality | 25.16 |
| Sample_T7B_k141_23270             | 70161 | 61 | 1  | 34 | Low-quality | 25.14 |
| Sample_T8C_k141_154718_fragment_1 | 7941  | 9  | 8  | 0  | Low-quality | 25.13 |
| Sample_T12A_k141_55547            | 9895  | 9  | 2  | 0  | Low-quality | 25.12 |
| Sample_T3C_k141_45926_fragment_2  | 10379 | 20 | 4  | 1  | Low-quality | 25.1  |
| Sample_T12A_k141_120080           | 11987 | 19 | 3  | 1  | Low-quality | 25.09 |
| Sample_T17C_k141_38420            | 10715 | 13 | 5  | 0  | Low-quality | 25.08 |
| Sample_C11A_k141_45742            | 49114 | 45 | 0  | 33 | Low-quality | 25.07 |
| Sample_T14A_k141_220290           | 19028 | 13 | 0  | 5  | Low-quality | 25.06 |
| Sample_T7C_k141_11795             | 16565 | 15 | 1  | 8  | Low-quality | 25.06 |
| Sample_T2A_k141_271540            | 10103 | 13 | 7  | 0  | Low-quality | 25.05 |
| Sample_C2B_k141_5699              | 11237 | 10 | 4  | 0  | Low-quality | 25.04 |
| Sample_T6A_k141_183610            | 22528 | 19 | 0  | 8  | Low-quality | 25.03 |
| Sample_T12B_k141_170448           | 21912 | 26 | 2  | 4  | Low-quality | 25.02 |
| Sample_T15C_k141_90871            | 15702 | 19 | 1  | 4  | Low-quality | 25.02 |
| Sample_C2B_k141_113706            | 39029 | 38 | 1  | 18 | Low-quality | 25.01 |
| Sample_C3C_k141_114695            | 14387 | 20 | 3  | 0  | Low-quality | 25.01 |
| Sample_C5C_k141_59079             | 11599 | 26 | 11 | 0  | Low-quality | 25.01 |
| Sample_C11B_k141_54291            | 9289  | 24 | 5  | 0  | Low-quality | 25    |
| Sample_C3A_k141_87546             | 9794  | 23 | 2  | 0  | Low-quality | 25    |
| Sample_T17C_k141_15969            | 14941 | 15 | 0  | 1  | Low-quality | 24.96 |

|                                    |        |     |    |    |             |       |
|------------------------------------|--------|-----|----|----|-------------|-------|
| Sample_C10B_k141_25061             | 10206  | 13  | 7  | 0  | Low-quality | 24.96 |
| Sample_T15C_k141_135414            | 9123   | 7   | 0  | 0  | Low-quality | 24.96 |
| Sample_T4C_k141_91539              | 10750  | 9   | 2  | 0  | Low-quality | 24.96 |
| Sample_C2C_k141_96131              | 18664  | 7   | 0  | 2  | Low-quality | 24.95 |
| Sample_T13B_k141_133788            | 10267  | 14  | 8  | 0  | Low-quality | 24.95 |
| Sample_C12C_k141_237211            | 28272  | 20  | 1  | 10 | Low-quality | 24.94 |
| Sample_C13B_k141_45089             | 10736  | 4   | 0  | 0  | Low-quality | 24.94 |
| Sample_C1C_k141_40323              | 38532  | 38  | 1  | 17 | Low-quality | 24.94 |
| Sample_T18B_k141_34395             | 24645  | 47  | 7  | 3  | Low-quality | 24.94 |
| Sample_T5A_k141_46564              | 36075  | 27  | 0  | 24 | Low-quality | 24.93 |
| Sample_C1A_k141_135759             | 10151  | 11  | 3  | 1  | Low-quality | 24.92 |
| Sample_T6C_k141_209230             | 9048   | 15  | 4  | 0  | Low-quality | 24.92 |
| Sample_T11B_k141_85385             | 28470  | 30  | 1  | 6  | Low-quality | 24.91 |
| Sample_C9A_k141_117977             | 11671  | 17  | 11 | 0  | Low-quality | 24.91 |
| Sample_T13B_k141_85198             | 9042   | 14  | 4  | 0  | Low-quality | 24.91 |
| Sample_T8C_k141_202110_fragment_1  | 10826  | 17  | 3  | 0  | Low-quality | 24.91 |
| Sample_T8C_k141_67711              | 37036  | 43  | 1  | 5  | Low-quality | 24.9  |
| Sample_C5C_k141_75326              | 11195  | 14  | 0  | 0  | Low-quality | 24.9  |
| Sample_C2A_k141_116800             | 136292 | 116 | 1  | 75 | Low-quality | 24.89 |
| Sample_T15B_k141_30843_fragment_1  | 14515  | 14  | 4  | 3  | Low-quality | 24.88 |
| Sample_T7C_k141_78624              | 11232  | 13  | 5  | 0  | Low-quality | 24.88 |
| Sample_T2C_k141_142213             | 35959  | 32  | 0  | 20 | Low-quality | 24.87 |
| Sample_T10A_k141_25941             | 33244  | 36  | 10 | 0  | Low-quality | 24.87 |
| Sample_C4B_k141_241135             | 11165  | 25  | 1  | 1  | Low-quality | 24.86 |
| Sample_T6A_k141_130759             | 20086  | 29  | 1  | 12 | Low-quality | 24.86 |
| Sample_C10C_k141_84322             | 14928  | 30  | 2  | 1  | Low-quality | 24.85 |
| Sample_C5A_k141_129327             | 22964  | 35  | 2  | 0  | Low-quality | 24.85 |
| Sample_C11B_k141_201113            | 11917  | 19  | 12 | 0  | Low-quality | 24.84 |
| Sample_C14C_k141_78558             | 20846  | 16  | 0  | 5  | Low-quality | 24.82 |
| Sample_C12C_k141_217390_fragment_1 | 10038  | 16  | 2  | 1  | Low-quality | 24.82 |
| Sample_C14A_k141_103275            | 23315  | 39  | 5  | 1  | Low-quality | 24.8  |
| Sample_C13A_k141_87086             | 63366  | 71  | 2  | 20 | Low-quality | 24.79 |
| Sample_T4B_k141_23292              | 26122  | 24  | 0  | 11 | Low-quality | 24.79 |
| Sample_T2B_k141_237322             | 11763  | 20  | 10 | 0  | Low-quality | 24.79 |
| Sample_C6C_k141_197657             | 40714  | 42  | 1  | 12 | Low-quality | 24.78 |
| Sample_C12A_k141_200366            | 16021  | 31  | 7  | 0  | Low-quality | 24.78 |
| Sample_T5A_k141_7842               | 9732   | 26  | 6  | 0  | Low-quality | 24.78 |
| Sample_C12A_k141_174375            | 8250   | 12  | 7  | 0  | Low-quality | 24.77 |
| Sample_T6A_k141_52699              | 10655  | 11  | 2  | 0  | Low-quality | 24.77 |

|                                   |       |    |    |    |             |       |
|-----------------------------------|-------|----|----|----|-------------|-------|
| Sample_C7A_k141_97700             | 10545 | 21 | 3  | 0  | Low-quality | 24.76 |
| Sample_T1A_k141_23052             | 18504 | 6  | 0  | 2  | Low-quality | 24.75 |
| Sample_T6B_k141_39446             | 12667 | 14 | 1  | 2  | Low-quality | 24.75 |
| Sample_C10A_k141_41135            | 18669 | 24 | 2  | 6  | Low-quality | 24.74 |
| Sample_T13A_k141_98615            | 9190  | 15 | 1  | 0  | Low-quality | 24.74 |
| Sample_C1B_k141_254705            | 19663 | 11 | 2  | 1  | Low-quality | 24.7  |
| Sample_C3A_k141_217740            | 14237 | 37 | 3  | 1  | Low-quality | 24.7  |
| Sample_T17C_k141_6096             | 10350 | 17 | 16 | 0  | Low-quality | 24.7  |
| Sample_T6C_k141_68217             | 10144 | 16 | 8  | 0  | Low-quality | 24.69 |
| Sample_T5C_k141_92585             | 16594 | 22 | 0  | 7  | Low-quality | 24.67 |
| Sample_T7A_k141_29054             | 14762 | 14 | 0  | 10 | Low-quality | 24.66 |
| Sample_C10C_k141_73421            | 25111 | 32 | 4  | 6  | Low-quality | 24.66 |
| Sample_T15A_k141_106715           | 10134 | 7  | 0  | 2  | Low-quality | 24.64 |
| Sample_C3B_k141_43596             | 18696 | 13 | 0  | 5  | Low-quality | 24.63 |
| Sample_T15C_k141_32461            | 61088 | 62 | 1  | 39 | Low-quality | 24.62 |
| Sample_T17B_k141_34417            | 13721 | 11 | 0  | 1  | Low-quality | 24.61 |
| Sample_C10A_k141_288571           | 19253 | 16 | 1  | 2  | Low-quality | 24.6  |
| Sample_T17C_k141_33028_fragment_1 | 12865 | 20 | 10 | 1  | Low-quality | 24.6  |
| Sample_C4A_k141_94069_fragment_1  | 9493  | 8  | 4  | 0  | Low-quality | 24.57 |
| Sample_C1B_k141_98968             | 21245 | 24 | 1  | 11 | Low-quality | 24.56 |
| Sample_C6B_k141_131099            | 12908 | 18 | 12 | 0  | Low-quality | 24.55 |
| Sample_C8C_k141_153098            | 8961  | 12 | 4  | 0  | Low-quality | 24.55 |
| Sample_C10B_k141_106950           | 19584 | 20 | 10 | 2  | Low-quality | 24.52 |
| Sample_C3C_k141_164261            | 15023 | 16 | 2  | 2  | Low-quality | 24.52 |
| Sample_T13A_k141_4320             | 9402  | 17 | 1  | 1  | Low-quality | 24.52 |
| Sample_C13A_k141_31472            | 23986 | 24 | 0  | 5  | Low-quality | 24.51 |
| Sample_T4C_k141_111813            | 14737 | 13 | 0  | 2  | Low-quality | 24.51 |
| Sample_T14A_k141_124001           | 40256 | 45 | 1  | 10 | Low-quality | 24.5  |
| Sample_T6C_k141_63796             | 10507 | 17 | 5  | 1  | Low-quality | 24.5  |
| Sample_C7C_k141_80336             | 46032 | 40 | 2  | 11 | Low-quality | 24.49 |
| Sample_C2A_k141_282657            | 20794 | 33 | 5  | 1  | Low-quality | 24.49 |
| Sample_T11A_k141_48527_fragment_4 | 16840 | 21 | 3  | 1  | Low-quality | 24.49 |
| Sample_T8C_k141_42806             | 8725  | 15 | 7  | 0  | Low-quality | 24.49 |
| Sample_T13B_k141_119878           | 36505 | 33 | 2  | 26 | Low-quality | 24.48 |
| Sample_C3B_k141_213969            | 15268 | 17 | 4  | 1  | Low-quality | 24.48 |
| Sample_C8C_k141_24556             | 9926  | 7  | 3  | 0  | Low-quality | 24.48 |
| Sample_C13A_k141_111117           | 11682 | 15 | 0  | 5  | Low-quality | 24.46 |
| Sample_C2C_k141_290245            | 28463 | 32 | 1  | 15 | Low-quality | 24.46 |
| Sample_C2A_k141_4057              | 29933 | 35 | 4  | 1  | Low-quality | 24.46 |



|                                   |       |    |   |    |             |       |
|-----------------------------------|-------|----|---|----|-------------|-------|
| Sample_T4B_k141_247596            | 37790 | 38 | 1 | 25 | Low-quality | 24.45 |
| Sample_C5C_k141_93066_fragment_1  | 10157 | 16 | 3 | 0  | Low-quality | 24.45 |
| Sample_T6B_k141_50043             | 10545 | 15 | 5 | 0  | Low-quality | 24.45 |
| Sample_T5C_k141_146406            | 8537  | 13 | 8 | 0  | Low-quality | 24.44 |
| Sample_C14A_k141_110528           | 10481 | 20 | 5 | 0  | Low-quality | 24.43 |
| Sample_T2C_k141_226814            | 80592 | 82 | 7 | 39 | Low-quality | 24.42 |
| Sample_C1C_k141_183219            | 10256 | 10 | 0 | 6  | Low-quality | 24.4  |
| Sample_T6B_k141_110128            | 14599 | 20 | 0 | 5  | Low-quality | 24.38 |
| Sample_C3A_k141_232275_fragment_1 | 37488 | 51 | 8 | 2  | Low-quality | 24.38 |
| Sample_C5A_k141_126217            | 9312  | 11 | 8 | 0  | Low-quality | 24.38 |
| Sample_T10C_k141_23120            | 24387 | 24 | 0 | 3  | Low-quality | 24.37 |
| Sample_T6C_k141_109439            | 17960 | 21 | 0 | 6  | Low-quality | 24.37 |
| Sample_T16C_k141_92492            | 9465  | 16 | 7 | 0  | Low-quality | 24.36 |
| Sample_T7A_k141_213056            | 8554  | 20 | 0 | 0  | Low-quality | 24.36 |
| Sample_T4B_k141_292440            | 46477 | 42 | 1 | 30 | Low-quality | 24.34 |
| Sample_T3B_k141_58335             | 9521  | 13 | 1 | 2  | Low-quality | 24.33 |
| Sample_C6B_k141_154638            | 16070 | 20 | 1 | 6  | Low-quality | 24.32 |
| Sample_T2B_k141_87901             | 10170 | 8  | 4 | 0  | Low-quality | 24.32 |
| Sample_C1C_k141_124580_fragment_1 | 9906  | 9  | 4 | 0  | Low-quality | 24.31 |
| Sample_T7B_k141_144589            | 10856 | 23 | 2 | 0  | Low-quality | 24.31 |
| Sample_C11A_k141_10526            | 42427 | 38 | 0 | 30 | Low-quality | 24.3  |
| Sample_C11B_k141_81018            | 9548  | 21 | 3 | 0  | Low-quality | 24.29 |
| Sample_C1C_k141_141901            | 9846  | 16 | 4 | 0  | Low-quality | 24.29 |
| Sample_C5A_k141_130697            | 9415  | 15 | 4 | 0  | Low-quality | 24.29 |
| Sample_T3C_k141_94625             | 16050 | 15 | 1 | 1  | Low-quality | 24.29 |
| Sample_C13A_k141_14060            | 20013 | 21 | 1 | 14 | Low-quality | 24.28 |
| Sample_C2C_k141_262039            | 18159 | 9  | 0 | 2  | Low-quality | 24.28 |
| Sample_T12B_k141_142014           | 28781 | 28 | 1 | 5  | Low-quality | 24.28 |
| Sample_T5B_k141_371               | 9485  | 13 | 0 | 3  | Low-quality | 24.28 |
| Sample_C2A_k141_173647_fragment_1 | 9785  | 20 | 2 | 0  | Low-quality | 24.28 |
| Sample_T13A_k141_2875             | 11360 | 14 | 8 | 0  | Low-quality | 24.28 |
| Sample_T5B_k141_4906              | 17515 | 20 | 0 | 2  | Low-quality | 24.27 |
| Sample_T8B_k141_206244            | 15723 | 11 | 0 | 9  | Low-quality | 24.27 |
| Sample_T6C_k141_170178            | 15841 | 13 | 3 | 0  | Low-quality | 24.27 |
| Sample_T1C_k141_43634             | 22443 | 23 | 0 | 16 | Low-quality | 24.26 |
| Sample_C13C_k141_83342            | 7678  | 13 | 3 | 0  | Low-quality | 24.26 |
| Sample_T15C_k141_76564            | 10047 | 24 | 7 | 0  | Low-quality | 24.26 |
| Sample_T17B_k141_26937            | 11174 | 16 | 8 | 1  | Low-quality | 24.25 |
| Sample_T2A_k141_9910              | 10313 | 11 | 0 | 1  | Low-quality | 24.24 |

|                                    |       |    |    |    |             |       |
|------------------------------------|-------|----|----|----|-------------|-------|
| Sample_T7A_k141_162448             | 13173 | 12 | 3  | 2  | Low-quality | 24.24 |
| Sample_C4B_k141_60261              | 9085  | 12 | 6  | 0  | Low-quality | 24.22 |
| Sample_C14C_k141_21941             | 11806 | 19 | 1  | 2  | Low-quality | 24.2  |
| Sample_T7A_k141_208251             | 14929 | 26 | 5  | 0  | Low-quality | 24.2  |
| Sample_C11B_k141_201056            | 11861 | 19 | 8  | 3  | Low-quality | 24.19 |
| Sample_C5B_k141_64601_fragment_1   | 7753  | 8  | 7  | 0  | Low-quality | 24.19 |
| Sample_T11A_k141_65941             | 9352  | 9  | 0  | 5  | Low-quality | 24.18 |
| Sample_T2C_k141_111005             | 16836 | 28 | 1  | 5  | Low-quality | 24.18 |
| Sample_T4B_k141_38732              | 9389  | 20 | 7  | 0  | Low-quality | 24.18 |
| Sample_C3C_k141_119807             | 9484  | 19 | 2  | 0  | Low-quality | 24.17 |
| Sample_T4B_k141_10474              | 13929 | 28 | 1  | 0  | Low-quality | 24.17 |
| Sample_C8B_k141_166197             | 8920  | 23 | 2  | 0  | Low-quality | 24.16 |
| Sample_T6C_k141_123235             | 8793  | 15 | 2  | 0  | Low-quality | 24.16 |
| Sample_C12C_k141_223902            | 14946 | 21 | 5  | 2  | Low-quality | 24.15 |
| Sample_C9A_k141_59353              | 9212  | 12 | 1  | 1  | Low-quality | 24.15 |
| Sample_T10A_k141_4854              | 8942  | 10 | 3  | 0  | Low-quality | 24.15 |
| Sample_T16B_k141_144914            | 38810 | 56 | 10 | 2  | Low-quality | 24.15 |
| Sample_T12B_k141_4075              | 26471 | 24 | 0  | 3  | Low-quality | 24.14 |
| Sample_T6C_k141_139394             | 15633 | 12 | 9  | 0  | Low-quality | 24.14 |
| Sample_T4C_k141_117837             | 40121 | 39 | 2  | 8  | Low-quality | 24.13 |
| Sample_T12B_k141_44717             | 9505  | 16 | 4  | 1  | Low-quality | 24.13 |
| Sample_T17B_k141_16200             | 10171 | 14 | 9  | 0  | Low-quality | 24.11 |
| Sample_C13B_k141_23636             | 9421  | 17 | 4  | 0  | Low-quality | 24.1  |
| Sample_C14A_k141_225704_fragment_1 | 10365 | 13 | 1  | 2  | Low-quality | 24.1  |
| Sample_C13B_k141_68124             | 7953  | 9  | 0  | 0  | Low-quality | 24.09 |
| Sample_C4B_k141_112513_fragment_1  | 9190  | 14 | 3  | 0  | Low-quality | 24.09 |
| Sample_T5C_k141_45512              | 46188 | 42 | 2  | 21 | Low-quality | 24.08 |
| Sample_T3C_k141_88612              | 9924  | 23 | 6  | 0  | Low-quality | 24.08 |
| Sample_C2C_k141_253791             | 25666 | 18 | 1  | 12 | Low-quality | 24.07 |
| Sample_T10A_k141_3187              | 11210 | 21 | 3  | 0  | Low-quality | 24.07 |
| Sample_C7A_k141_94468              | 6898  | 9  | 2  | 0  | Low-quality | 24.05 |
| Sample_C7A_k141_33774              | 18392 | 14 | 0  | 3  | Low-quality | 24.05 |
| Sample_T16B_k141_49840             | 25799 | 18 | 0  | 3  | Low-quality | 24.05 |
| Sample_T2C_k141_81542              | 17328 | 18 | 0  | 6  | Low-quality | 24.05 |
| Sample_C6C_k141_150147             | 12499 | 17 | 1  | 4  | Low-quality | 24.04 |
| Sample_C4A_k141_231650             | 17730 | 20 | 4  | 1  | Low-quality | 24.04 |
| Sample_T10C_k141_55254             | 16310 | 34 | 3  | 1  | Low-quality | 24.04 |
| Sample_C12A_k141_149268            | 16146 | 18 | 0  | 3  | Low-quality | 24.03 |
| Sample_T13C_k141_78497             | 32657 | 37 | 6  | 0  | Low-quality | 24.02 |

|                                   |       |    |    |    |             |       |
|-----------------------------------|-------|----|----|----|-------------|-------|
| Sample_C10C_k141_95509            | 10617 | 13 | 1  | 0  | Low-quality | 24.02 |
| Sample_T10A_k141_205              | 12741 | 15 | 1  | 1  | Low-quality | 24.01 |
| Sample_T17A_k141_3912             | 15864 | 20 | 1  | 2  | Low-quality | 24    |
| Sample_T8A_k141_155087_fragment_1 | 9828  | 10 | 3  | 0  | Low-quality | 24    |
| Sample_T12B_k141_44763            | 13978 | 27 | 4  | 0  | Low-quality | 23.99 |
| Sample_T16C_k141_7992             | 15851 | 21 | 1  | 5  | Low-quality | 23.98 |
| Sample_T10A_k141_53273            | 11147 | 13 | 9  | 0  | Low-quality | 23.98 |
| Sample_C11B_k141_16436            | 10173 | 10 | 0  | 1  | Low-quality | 23.97 |
| Sample_T15A_k141_18001            | 8995  | 14 | 0  | 6  | Low-quality | 23.97 |
| Sample_T11A_k141_139243           | 9335  | 15 | 2  | 0  | Low-quality | 23.96 |
| Sample_T14A_k141_76832            | 45572 | 44 | 1  | 29 | Low-quality | 23.94 |
| Sample_C10C_k141_123123           | 14665 | 18 | 1  | 3  | Low-quality | 23.93 |
| Sample_T12C_k141_105561           | 7802  | 16 | 2  | 0  | Low-quality | 23.93 |
| Sample_C14A_k141_220784           | 15809 | 13 | 1  | 5  | Low-quality | 23.92 |
| Sample_C4A_k141_189478            | 11900 | 12 | 1  | 5  | Low-quality | 23.92 |
| Sample_C9C_k141_2258              | 21310 | 23 | 1  | 6  | Low-quality | 23.92 |
| Sample_C11C_k141_19210            | 11264 | 8  | 1  | 0  | Low-quality | 23.92 |
| Sample_T7A_k141_4801              | 21395 | 29 | 2  | 5  | Low-quality | 23.9  |
| Sample_T11C_k141_118428           | 10163 | 7  | 0  | 2  | Low-quality | 23.9  |
| Sample_T4B_k141_190735            | 24845 | 25 | 0  | 12 | Low-quality | 23.89 |
| Sample_T17B_k141_20977            | 22043 | 15 | 0  | 3  | Low-quality | 23.88 |
| Sample_C2B_k141_122807            | 11462 | 21 | 9  | 0  | Low-quality | 23.86 |
| Sample_C4B_k141_99394             | 8794  | 6  | 2  | 0  | Low-quality | 23.86 |
| Sample_T7B_k141_72147             | 9103  | 19 | 4  | 0  | Low-quality | 23.86 |
| Sample_T4C_k141_76392             | 20612 | 20 | 2  | 4  | Low-quality | 23.85 |
| Sample_T8C_k141_203583            | 19327 | 15 | 0  | 4  | Low-quality | 23.85 |
| Sample_C1A_k141_20533             | 9888  | 14 | 3  | 0  | Low-quality | 23.85 |
| Sample_T2B_k141_206696            | 9328  | 11 | 8  | 0  | Low-quality | 23.85 |
| Sample_T8A_k141_192110            | 16027 | 10 | 0  | 2  | Low-quality | 23.84 |
| Sample_T4A_k141_48877             | 11055 | 16 | 0  | 2  | Low-quality | 23.84 |
| Sample_C8C_k141_54616             | 8375  | 9  | 7  | 0  | Low-quality | 23.82 |
| Sample_T14B_k141_168869           | 59025 | 26 | 1  | 16 | Low-quality | 23.79 |
| Sample_C14C_k141_126679           | 9565  | 10 | 0  | 2  | Low-quality | 23.78 |
| Sample_C11B_k141_77175            | 9380  | 16 | 1  | 2  | Low-quality | 23.77 |
| Sample_T12B_k141_181825           | 45813 | 96 | 12 | 1  | Low-quality | 23.77 |
| Sample_T14C_k141_132100           | 15014 | 24 | 2  | 0  | Low-quality | 23.77 |
| Sample_T4B_k141_230094            | 8937  | 9  | 2  | 0  | Low-quality | 23.77 |
| Sample_T7A_k141_128290            | 11894 | 20 | 3  | 0  | Low-quality | 23.77 |
| Sample_T2C_k141_59061             | 20080 | 24 | 0  | 11 | Low-quality | 23.76 |

|                                    |       |    |    |   |             |       |
|------------------------------------|-------|----|----|---|-------------|-------|
| Sample_C5A_k141_224370             | 14086 | 29 | 8  | 1 | Low-quality | 23.76 |
| Sample_T13B_k141_92491             | 14073 | 20 | 1  | 2 | Low-quality | 23.75 |
| Sample_C12C_k141_238066            | 20019 | 33 | 9  | 2 | Low-quality | 23.75 |
| Sample_T13C_k141_108337_fragment_1 | 11723 | 14 | 10 | 0 | Low-quality | 23.75 |
| Sample_C11A_k141_29935             | 21364 | 22 | 0  | 7 | Low-quality | 23.74 |
| Sample_T7B_k141_65193              | 10876 | 10 | 0  | 1 | Low-quality | 23.74 |
| Sample_T11C_k141_8678              | 12152 | 16 | 2  | 1 | Low-quality | 23.73 |
| Sample_C6A_k141_13032              | 8673  | 12 | 6  | 0 | Low-quality | 23.72 |
| Sample_T10B_k141_172360_fragment_1 | 9243  | 12 | 4  | 0 | Low-quality | 23.72 |
| Sample_T14A_k141_51022             | 22456 | 20 | 0  | 7 | Low-quality | 23.71 |
| Sample_C8A_k141_92547              | 14547 | 17 | 8  | 0 | Low-quality | 23.71 |
| Sample_T10B_k141_40003             | 31589 | 37 | 2  | 0 | Low-quality | 23.7  |
| Sample_C10C_k141_75530             | 18218 | 17 | 1  | 3 | Low-quality | 23.69 |
| Sample_T8A_k141_109352_fragment_1  | 9029  | 20 | 3  | 0 | Low-quality | 23.68 |
| Sample_C8A_k141_157492             | 11183 | 21 | 3  | 0 | Low-quality | 23.66 |
| Sample_C11A_k141_120182            | 17486 | 35 | 8  | 2 | Low-quality | 23.65 |
| Sample_C9C_k141_32853              | 10474 | 21 | 7  | 0 | Low-quality | 23.64 |
| Sample_C4C_k141_144954             | 14150 | 17 | 0  | 4 | Low-quality | 23.63 |
| Sample_C11A_k141_53125             | 8924  | 12 | 5  | 0 | Low-quality | 23.62 |
| Sample_T10B_k141_167177            | 13705 | 13 | 1  | 2 | Low-quality | 23.61 |
| Sample_C13B_k141_102046            | 9617  | 14 | 7  | 1 | Low-quality | 23.6  |
| Sample_T10B_k141_122308            | 11120 | 12 | 2  | 0 | Low-quality | 23.6  |
| Sample_T12C_k141_93177             | 18059 | 18 | 2  | 3 | Low-quality | 23.6  |
| Sample_C5A_k141_20447              | 32723 | 39 | 1  | 9 | Low-quality | 23.58 |
| Sample_T6A_k141_166589             | 9617  | 16 | 6  | 0 | Low-quality | 23.58 |
| Sample_C14C_k141_14505             | 9663  | 17 | 8  | 2 | Low-quality | 23.57 |
| Sample_T13B_k141_45212             | 14198 | 22 | 1  | 0 | Low-quality | 23.57 |
| Sample_T18A_k141_98902             | 8438  | 16 | 1  | 1 | Low-quality | 23.57 |
| Sample_T5A_k141_43371_fragment_1   | 9182  | 18 | 5  | 0 | Low-quality | 23.57 |
| Sample_C1C_k141_126649             | 12143 | 18 | 13 | 0 | Low-quality | 23.56 |
| Sample_T10A_k141_46018             | 9337  | 20 | 2  | 0 | Low-quality | 23.56 |
| Sample_C10B_k141_158271            | 9225  | 10 | 0  | 8 | Low-quality | 23.55 |
| Sample_T6B_k141_51167              | 16786 | 21 | 1  | 4 | Low-quality | 23.53 |
| Sample_C3A_k141_150699             | 6838  | 11 | 4  | 0 | Low-quality | 23.51 |
| Sample_T13A_k141_60249             | 10643 | 16 | 8  | 0 | Low-quality | 23.51 |
| Sample_T17A_k141_52428             | 8212  | 15 | 4  | 0 | Low-quality | 23.5  |
| Sample_C14B_k141_72513             | 9890  | 10 | 6  | 0 | Low-quality | 23.49 |
| Sample_C2B_k141_252134             | 19332 | 19 | 0  | 3 | Low-quality | 23.48 |
| Sample_C11A_k141_173893            | 12653 | 14 | 7  | 0 | Low-quality | 23.45 |

|                                    |       |    |    |    |             |       |
|------------------------------------|-------|----|----|----|-------------|-------|
| Sample_T18A_k141_176449            | 10009 | 17 | 3  | 0  | Low-quality | 23.45 |
| Sample_C2C_k141_88414              | 15491 | 16 | 1  | 2  | Low-quality | 23.44 |
| Sample_C8B_k141_182000             | 9257  | 19 | 0  | 1  | Low-quality | 23.44 |
| Sample_T8B_k141_179668_fragment_1  | 9608  | 10 | 3  | 0  | Low-quality | 23.43 |
| Sample_C5A_k141_147065             | 16621 | 14 | 0  | 4  | Low-quality | 23.42 |
| Sample_C2A_k141_319829             | 9378  | 18 | 5  | 0  | Low-quality | 23.42 |
| Sample_T15A_k141_140109_fragment_1 | 41601 | 55 | 10 | 2  | Low-quality | 23.42 |
| Sample_T5A_k141_54008              | 9482  | 7  | 5  | 0  | Low-quality | 23.42 |
| Sample_C11C_k141_84012             | 46337 | 44 | 1  | 19 | Low-quality | 23.41 |
| Sample_T6A_k141_16033              | 15926 | 15 | 0  | 5  | Low-quality | 23.41 |
| Sample_C9A_k141_43514              | 39451 | 27 | 6  | 0  | Low-quality | 23.41 |
| Sample_C2A_k141_137381             | 28854 | 20 | 1  | 6  | Low-quality | 23.4  |
| Sample_T5B_k141_17471              | 10869 | 10 | 0  | 3  | Low-quality | 23.38 |
| Sample_T10A_k141_124970            | 38936 | 47 | 2  | 2  | Low-quality | 23.37 |
| Sample_C8C_k141_32162              | 11853 | 11 | 0  | 1  | Low-quality | 23.36 |
| Sample_C9C_k141_53250              | 23483 | 17 | 0  | 12 | Low-quality | 23.36 |
| Sample_C3C_k141_126824             | 9522  | 13 | 1  | 1  | Low-quality | 23.36 |
| Sample_C6A_k141_190316             | 12371 | 18 | 12 | 0  | Low-quality | 23.36 |
| Sample_T2B_k141_251694             | 15731 | 12 | 2  | 0  | Low-quality | 23.35 |
| Sample_C8C_k141_151094             | 9970  | 10 | 0  | 0  | Low-quality | 23.34 |
| Sample_T16A_k141_125627            | 28718 | 41 | 3  | 2  | Low-quality | 23.34 |
| Sample_T6B_k141_57833              | 8667  | 7  | 4  | 0  | Low-quality | 23.34 |
| Sample_T16B_k141_25441             | 13867 | 25 | 4  | 0  | Low-quality | 23.32 |
| Sample_T6C_k141_78319_fragment_1   | 9706  | 13 | 1  | 1  | Low-quality | 23.32 |
| Sample_C3B_k141_1182               | 10827 | 10 | 0  | 3  | Low-quality | 23.29 |
| Sample_T10B_k141_4296              | 20801 | 16 | 1  | 4  | Low-quality | 23.29 |
| Sample_T5C_k141_1271               | 16965 | 18 | 0  | 6  | Low-quality | 23.29 |
| Sample_C1B_k141_59493              | 10535 | 18 | 4  | 0  | Low-quality | 23.29 |
| Sample_T12C_k141_6569              | 8812  | 12 | 5  | 0  | Low-quality | 23.29 |
| Sample_C2C_k141_98747              | 53646 | 48 | 1  | 24 | Low-quality | 23.27 |
| Sample_C1B_k141_118886             | 13738 | 14 | 0  | 7  | Low-quality | 23.26 |
| Sample_T17A_k141_45683_fragment_1  | 13844 | 20 | 10 | 2  | Low-quality | 23.26 |
| Sample_C6B_k141_183114_fragment_1  | 9961  | 10 | 0  | 1  | Low-quality | 23.25 |
| Sample_T8A_k141_224961             | 13527 | 22 | 4  | 0  | Low-quality | 23.22 |
| Sample_C5A_k141_95792              | 9972  | 10 | 3  | 0  | Low-quality | 23.21 |
| Sample_C8A_k141_117194             | 12246 | 23 | 1  | 2  | Low-quality | 23.21 |
| Sample_C8B_k141_161647             | 14980 | 36 | 8  | 0  | Low-quality | 23.21 |
| Sample_T16A_k141_49509             | 14315 | 39 | 4  | 0  | Low-quality | 23.19 |
| Sample_T5C_k141_79870              | 10354 | 14 | 4  | 0  | Low-quality | 23.19 |

|                                   |        |     |    |     |             |       |
|-----------------------------------|--------|-----|----|-----|-------------|-------|
| Sample_C6B_k141_156242            | 36022  | 32  | 1  | 27  | Low-quality | 23.18 |
| Sample_T6C_k141_33949             | 13877  | 16  | 0  | 3   | Low-quality | 23.18 |
| Sample_C12C_k141_48406            | 9790   | 13  | 7  | 0   | Low-quality | 23.18 |
| Sample_T8A_k141_256708            | 47367  | 73  | 13 | 2   | Low-quality | 23.18 |
| Sample_T4B_k141_17270             | 8187   | 14  | 9  | 0   | Low-quality | 23.16 |
| Sample_C11C_k141_165700           | 7741   | 12  | 5  | 0   | Low-quality | 23.15 |
| Sample_C5A_k141_141134            | 14634  | 12  | 2  | 0   | Low-quality | 23.15 |
| Sample_T10B_k141_42653            | 9667   | 18  | 8  | 0   | Low-quality | 23.15 |
| Sample_T8C_k141_160679            | 11776  | 13  | 4  | 0   | Low-quality | 23.15 |
| Sample_C1C_k141_105606            | 47163  | 41  | 1  | 10  | Low-quality | 23.13 |
| Sample_C4B_k141_156377            | 9504   | 6   | 4  | 0   | Low-quality | 23.12 |
| Sample_T17B_k141_33254            | 24458  | 26  | 6  | 2   | Low-quality | 23.12 |
| Sample_C3A_k141_226283            | 10660  | 15  | 10 | 0   | Low-quality | 23.11 |
| Sample_C4A_k141_199687            | 9401   | 9   | 3  | 0   | Low-quality | 23.11 |
| Sample_T11C_k141_7804             | 14597  | 15  | 0  | 6   | Low-quality | 23.1  |
| Sample_T4C_k141_3687              | 9498   | 11  | 1  | 4   | Low-quality | 23.1  |
| Sample_C11A_k141_96515            | 36484  | 36  | 3  | 0   | Low-quality | 23.1  |
| Sample_C3A_k141_95543_fragment_1  | 10296  | 13  | 10 | 1   | Low-quality | 23.1  |
| Sample_C4A_k141_69165             | 12350  | 19  | 11 | 1   | Low-quality | 23.1  |
| Sample_T14A_k141_50335            | 13822  | 16  | 0  | 3   | Low-quality | 23.09 |
| Sample_T11A_k141_98941            | 275330 | 282 | 1  | 212 | Low-quality | 23.08 |
| Sample_C3A_k141_195486            | 8367   | 17  | 1  | 0   | Low-quality | 23.08 |
| Sample_T10A_k141_2843             | 12998  | 10  | 3  | 0   | Low-quality | 23.08 |
| Sample_T10A_k141_179633           | 8888   | 6   | 2  | 0   | Low-quality | 23.08 |
| Sample_T16C_k141_48782            | 12373  | 11  | 1  | 0   | Low-quality | 23.07 |
| Sample_C14A_k141_164867           | 14314  | 14  | 2  | 0   | Low-quality | 23.07 |
| Sample_C9A_k141_126520            | 11266  | 11  | 5  | 1   | Low-quality | 23.07 |
| Sample_C12C_k141_135509           | 7798   | 13  | 8  | 0   | Low-quality | 23.06 |
| Sample_C2B_k141_200385            | 9388   | 18  | 3  | 0   | Low-quality | 23.06 |
| Sample_T2A_k141_14242             | 5969   | 5   | 0  | 0   | Low-quality | 23.04 |
| Sample_T8A_k141_204989            | 8924   | 11  | 0  | 1   | Low-quality | 23.04 |
| Sample_C11C_k141_154890           | 8234   | 12  | 6  | 0   | Low-quality | 23.04 |
| Sample_T7C_k141_97846             | 56193  | 64  | 10 | 1   | Low-quality | 23.04 |
| Sample_T16C_k141_23808            | 35791  | 27  | 1  | 22  | Low-quality | 23.03 |
| Sample_C14A_k141_92597_fragment_2 | 15276  | 18  | 2  | 0   | Low-quality | 23.03 |
| Sample_T16B_k141_56482            | 8555   | 15  | 10 | 0   | Low-quality | 23.03 |
| Sample_C9C_k141_80169             | 14816  | 11  | 0  | 2   | Low-quality | 23.02 |
| Sample_T4B_k141_122926            | 40699  | 91  | 3  | 1   | Low-quality | 23.02 |
| Sample_T16C_k141_28905            | 33925  | 35  | 12 | 6   | Low-quality | 23.02 |

|                                    |        |     |    |    |             |       |
|------------------------------------|--------|-----|----|----|-------------|-------|
| Sample_T6B_k141_71889              | 10661  | 9   | 9  | 0  | Low-quality | 23.02 |
| Sample_T3A_k141_57830              | 13779  | 17  | 0  | 1  | Low-quality | 23.01 |
| Sample_T8C_k141_57582              | 10341  | 10  | 8  | 0  | Low-quality | 23.01 |
| Sample_T11C_k141_105027            | 15197  | 20  | 1  | 6  | Low-quality | 23    |
| Sample_T15B_k141_130646            | 18779  | 15  | 3  | 1  | Low-quality | 22.99 |
| Sample_T16B_k141_30584             | 9845   | 15  | 7  | 0  | Low-quality | 22.99 |
| Sample_T2C_k141_253752             | 9928   | 25  | 3  | 1  | Low-quality | 22.99 |
| Sample_T7C_k141_32244              | 9761   | 18  | 3  | 0  | Low-quality | 22.98 |
| Sample_T14B_k141_35831             | 10451  | 14  | 6  | 0  | Low-quality | 22.97 |
| Sample_T13B_k141_53802_fragment_1  | 9135   | 14  | 1  | 1  | Low-quality | 22.96 |
| Sample_T12A_k141_95750             | 9342   | 15  | 2  | 0  | Low-quality | 22.94 |
| Sample_T12C_k141_161260            | 7873   | 11  | 0  | 4  | Low-quality | 22.93 |
| Sample_C12B_k141_186845            | 8437   | 17  | 4  | 0  | Low-quality | 22.93 |
| Sample_T12A_k141_281706            | 8876   | 14  | 2  | 0  | Low-quality | 22.93 |
| Sample_T8C_k141_211496_fragment_1  | 7858   | 8   | 0  | 1  | Low-quality | 22.92 |
| Sample_T18B_k141_80737             | 12778  | 12  | 0  | 3  | Low-quality | 22.91 |
| Sample_T7A_k141_192994             | 8230   | 9   | 3  | 1  | Low-quality | 22.91 |
| Sample_C12C_k141_49495             | 18714  | 16  | 0  | 1  | Low-quality | 22.9  |
| Sample_C4B_k141_230291             | 44606  | 49  | 4  | 1  | Low-quality | 22.9  |
| Sample_T7A_k141_28165              | 13300  | 22  | 5  | 0  | Low-quality | 22.9  |
| Sample_T18C_k141_127291            | 13705  | 20  | 4  | 0  | Low-quality | 22.89 |
| Sample_T16B_k141_15107             | 41761  | 50  | 11 | 5  | Low-quality | 22.88 |
| Sample_T4A_k141_102235             | 13509  | 16  | 8  | 0  | Low-quality | 22.88 |
| Sample_C5A_k141_234014             | 9845   | 7   | 0  | 2  | Low-quality | 22.87 |
| Sample_C9B_k141_74535              | 13802  | 26  | 5  | 0  | Low-quality | 22.87 |
| Sample_C14C_k141_78657_fragment_1  | 36243  | 37  | 1  | 6  | Low-quality | 22.87 |
| Sample_C6C_k141_18272              | 11240  | 11  | 6  | 1  | Low-quality | 22.87 |
| Sample_C10C_k141_188729            | 8035   | 12  | 8  | 0  | Low-quality | 22.86 |
| Sample_T4B_k141_304404             | 17240  | 21  | 2  | 2  | Low-quality | 22.85 |
| Sample_C10A_k141_288906            | 18995  | 31  | 4  | 2  | Low-quality | 22.85 |
| Sample_C10C_k141_230027            | 8503   | 11  | 4  | 0  | Low-quality | 22.85 |
| Sample_C3A_k141_201146             | 125045 | 103 | 1  | 73 | Low-quality | 22.84 |
| Sample_C5C_k141_44814              | 88409  | 74  | 1  | 53 | Low-quality | 22.84 |
| Sample_T8C_k141_69146              | 7232   | 10  | 0  | 0  | Low-quality | 22.83 |
| Sample_C4C_k141_241655             | 88300  | 76  | 1  | 55 | Low-quality | 22.82 |
| Sample_T1A_k141_5743               | 38935  | 36  | 0  | 24 | Low-quality | 22.82 |
| Sample_C11B_k141_231186_fragment_1 | 7838   | 8   | 6  | 0  | Low-quality | 22.82 |
| Sample_T11B_k141_8763              | 8425   | 21  | 0  | 0  | Low-quality | 22.82 |
| Sample_T2B_k141_226643             | 13762  | 14  | 11 | 0  | Low-quality | 22.82 |

|                                   |       |    |    |    |             |       |
|-----------------------------------|-------|----|----|----|-------------|-------|
| Sample_T3A_k141_97713             | 7406  | 16 | 1  | 0  | Low-quality | 22.82 |
| Sample_T8B_k141_51466             | 11957 | 15 | 7  | 0  | Low-quality | 22.82 |
| Sample_T10B_k141_178576           | 9905  | 7  | 0  | 2  | Low-quality | 22.81 |
| Sample_C8C_k141_23976             | 10236 | 19 | 2  | 0  | Low-quality | 22.81 |
| Sample_T3C_k141_10084             | 12233 | 15 | 3  | 0  | Low-quality | 22.8  |
| Sample_T10A_k141_50545            | 85830 | 86 | 3  | 41 | Low-quality | 22.79 |
| Sample_T15B_k141_19859_fragment_1 | 11600 | 18 | 0  | 1  | Low-quality | 22.79 |
| Sample_C8B_k141_115069            | 18993 | 20 | 2  | 9  | Low-quality | 22.78 |
| Sample_C3A_k141_5400              | 10645 | 15 | 6  | 0  | Low-quality | 22.78 |
| Sample_T16A_k141_54526            | 7817  | 5  | 0  | 3  | Low-quality | 22.77 |
| Sample_C11B_k141_194507           | 8105  | 9  | 6  | 0  | Low-quality | 22.77 |
| Sample_C8A_k141_167522            | 9635  | 12 | 5  | 0  | Low-quality | 22.77 |
| Sample_C12A_k141_50887            | 56468 | 49 | 1  | 25 | Low-quality | 22.76 |
| Sample_C12B_k141_153211           | 9642  | 15 | 5  | 0  | Low-quality | 22.76 |
| Sample_T10A_k141_175141           | 11448 | 17 | 0  | 0  | Low-quality | 22.76 |
| Sample_T6B_k141_92811             | 8886  | 14 | 9  | 0  | Low-quality | 22.76 |
| Sample_C6A_k141_159012            | 12161 | 16 | 8  | 3  | Low-quality | 22.75 |
| Sample_T16B_k141_52118            | 9426  | 8  | 1  | 0  | Low-quality | 22.75 |
| Sample_T5A_k141_51491             | 12685 | 7  | 0  | 2  | Low-quality | 22.75 |
| Sample_T12A_k141_333313           | 36780 | 40 | 1  | 21 | Low-quality | 22.73 |
| Sample_T11A_k141_122079           | 26060 | 29 | 1  | 7  | Low-quality | 22.72 |
| Sample_T14A_k141_142149           | 10562 | 10 | 0  | 1  | Low-quality | 22.72 |
| Sample_T18A_k141_36466            | 8718  | 16 | 1  | 1  | Low-quality | 22.72 |
| Sample_T6C_k141_57061             | 19724 | 12 | 0  | 3  | Low-quality | 22.72 |
| Sample_T15A_k141_60725_fragment_1 | 11392 | 16 | 3  | 0  | Low-quality | 22.72 |
| Sample_T11A_k141_136396           | 10651 | 13 | 7  | 1  | Low-quality | 22.71 |
| Sample_T4A_k141_12318             | 8778  | 12 | 1  | 1  | Low-quality | 22.7  |
| Sample_C5A_k141_166414            | 17340 | 15 | 0  | 3  | Low-quality | 22.69 |
| Sample_T13C_k141_37340            | 18705 | 33 | 2  | 2  | Low-quality | 22.68 |
| Sample_C13A_k141_73907            | 15998 | 18 | 1  | 10 | Low-quality | 22.67 |
| Sample_C7B_k141_85395             | 18521 | 21 | 0  | 5  | Low-quality | 22.66 |
| Sample_T10A_k141_147813           | 22601 | 19 | 0  | 16 | Low-quality | 22.66 |
| Sample_T16C_k141_143315           | 9591  | 8  | 0  | 5  | Low-quality | 22.66 |
| Sample_C8C_k141_60821             | 9384  | 13 | 12 | 0  | Low-quality | 22.66 |
| Sample_T12A_k141_9762             | 12630 | 11 | 1  | 3  | Low-quality | 22.65 |
| Sample_C2B_k141_88083             | 13274 | 25 | 1  | 0  | Low-quality | 22.63 |
| Sample_C12A_k141_150900           | 13535 | 16 | 0  | 2  | Low-quality | 22.61 |
| Sample_T4C_k141_85998             | 13535 | 12 | 0  | 5  | Low-quality | 22.61 |
| Sample_C11B_k141_232249           | 8449  | 7  | 5  | 0  | Low-quality | 22.61 |



|                                   |        |     |    |     |             |       |
|-----------------------------------|--------|-----|----|-----|-------------|-------|
| Sample_T6C_k141_97232             | 6162   | 8   | 2  | 0   | Low-quality | 22.6  |
| Sample_T13B_k141_3282_fragment_1  | 9171   | 13  | 2  | 0   | Low-quality | 22.6  |
| Sample_C13A_k141_72156            | 8937   | 19  | 4  | 0   | Low-quality | 22.59 |
| Sample_C4B_k141_83023             | 20717  | 19  | 0  | 14  | Low-quality | 22.59 |
| Sample_T15B_k141_19670            | 32406  | 37  | 1  | 5   | Low-quality | 22.59 |
| Sample_T18C_k141_44156            | 9671   | 21  | 1  | 2   | Low-quality | 22.58 |
| Sample_C11B_k141_94070            | 7817   | 11  | 5  | 0   | Low-quality | 22.58 |
| Sample_T2A_k141_250846            | 9587   | 15  | 0  | 0   | Low-quality | 22.58 |
| Sample_T2C_k141_217659_fragment_1 | 9436   | 13  | 4  | 0   | Low-quality | 22.58 |
| Sample_C1C_k141_129784            | 13513  | 15  | 0  | 2   | Low-quality | 22.57 |
| Sample_C6A_k141_51510             | 18035  | 27  | 1  | 1   | Low-quality | 22.57 |
| Sample_C7A_k141_14189             | 8608   | 13  | 8  | 0   | Low-quality | 22.57 |
| Sample_T8C_k141_135067            | 9319   | 10  | 3  | 0   | Low-quality | 22.57 |
| Sample_T11A_k141_66063            | 15474  | 17  | 1  | 4   | Low-quality | 22.56 |
| Sample_T16B_k141_154777           | 13504  | 14  | 0  | 2   | Low-quality | 22.56 |
| Sample_C10A_k141_19869            | 8969   | 11  | 5  | 0   | Low-quality | 22.56 |
| Sample_T14A_k141_132048           | 9061   | 15  | 1  | 1   | Low-quality | 22.56 |
| Sample_C12A_k141_78832            | 9013   | 18  | 1  | 0   | Low-quality | 22.55 |
| Sample_C1A_k141_137590            | 10645  | 14  | 8  | 0   | Low-quality | 22.55 |
| Sample_C3C_k141_72571             | 16143  | 28  | 2  | 2   | Low-quality | 22.54 |
| Sample_C11A_k141_168819           | 13935  | 30  | 2  | 0   | Low-quality | 22.54 |
| Sample_C6B_k141_45758_fragment_1  | 41984  | 64  | 16 | 2   | Low-quality | 22.54 |
| Sample_T8B_k141_94691             | 9082   | 20  | 2  | 0   | Low-quality | 22.54 |
| Sample_C13A_k141_29699            | 8995   | 10  | 0  | 1   | Low-quality | 22.53 |
| Sample_C2C_k141_66984             | 24956  | 25  | 1  | 11  | Low-quality | 22.53 |
| Sample_T12A_k141_329141           | 8472   | 14  | 0  | 0   | Low-quality | 22.53 |
| Sample_T6C_k141_204473            | 8529   | 9   | 0  | 0   | Low-quality | 22.53 |
| Sample_C13A_k141_85676            | 14881  | 19  | 1  | 4   | Low-quality | 22.52 |
| Sample_T4C_k141_6992              | 6699   | 7   | 0  | 4   | Low-quality | 22.52 |
| Sample_C6B_k141_66515             | 10456  | 9   | 0  | 5   | Low-quality | 22.51 |
| Sample_T1A_k141_19962             | 35747  | 43  | 17 | 6   | Low-quality | 22.51 |
| Sample_T6A_k141_84024             | 12078  | 17  | 11 | 2   | Low-quality | 22.51 |
| Sample_C5C_k141_115311            | 248306 | 246 | 3  | 124 | Low-quality | 22.5  |
| Sample_T4B_k141_228900            | 18935  | 19  | 0  | 5   | Low-quality | 22.48 |
| Sample_T7A_k141_210356            | 14355  | 14  | 1  | 2   | Low-quality | 22.48 |
| Sample_T10B_k141_75629            | 8062   | 8   | 4  | 0   | Low-quality | 22.47 |
| Sample_C3A_k141_118062            | 10068  | 16  | 9  | 0   | Low-quality | 22.46 |
| Sample_T2C_k141_275601            | 9849   | 16  | 4  | 0   | Low-quality | 22.46 |
| Sample_T5C_k141_101057            | 8075   | 8   | 4  | 0   | Low-quality | 22.46 |

|                                    |        |     |    |    |             |       |
|------------------------------------|--------|-----|----|----|-------------|-------|
| Sample_C12A_k141_202586            | 73286  | 59  | 3  | 11 | Low-quality | 22.45 |
| Sample_T3A_k141_70760              | 21237  | 16  | 0  | 10 | Low-quality | 22.45 |
| Sample_T8A_k141_233950             | 15842  | 16  | 1  | 8  | Low-quality | 22.45 |
| Sample_T8B_k141_2592               | 14403  | 20  | 0  | 2  | Low-quality | 22.45 |
| Sample_T15C_k141_105434            | 9059   | 13  | 0  | 2  | Low-quality | 22.43 |
| Sample_C7A_k141_146756             | 11859  | 16  | 1  | 1  | Low-quality | 22.43 |
| Sample_C6B_k141_216023             | 46103  | 103 | 10 | 2  | Low-quality | 22.42 |
| Sample_C10A_k141_106633            | 6470   | 9   | 0  | 0  | Low-quality | 22.4  |
| Sample_T1C_k141_20746              | 7860   | 7   | 5  | 0  | Low-quality | 22.4  |
| Sample_T17C_k141_19340             | 10967  | 13  | 0  | 3  | Low-quality | 22.39 |
| Sample_T6C_k141_53700              | 35488  | 31  | 1  | 17 | Low-quality | 22.39 |
| Sample_C3A_k141_210872             | 11771  | 13  | 6  | 0  | Low-quality | 22.39 |
| Sample_T4A_k141_12849              | 11018  | 11  | 6  | 1  | Low-quality | 22.39 |
| Sample_T4B_k141_341039             | 8463   | 15  | 7  | 0  | Low-quality | 22.39 |
| Sample_C2C_k141_311770             | 121937 | 119 | 1  | 75 | Low-quality | 22.38 |
| Sample_T8B_k141_133603             | 22198  | 19  | 0  | 18 | Low-quality | 22.38 |
| Sample_C7A_k141_118406             | 10172  | 14  | 5  | 0  | Low-quality | 22.38 |
| Sample_C8B_k141_50663              | 11243  | 14  | 7  | 0  | Low-quality | 22.38 |
| Sample_T11B_k141_65605             | 5658   | 11  | 1  | 0  | Low-quality | 22.38 |
| Sample_T11C_k141_66609_fragment_2  | 25228  | 29  | 5  | 8  | Low-quality | 22.38 |
| Sample_T2B_k141_87040              | 13406  | 21  | 3  | 0  | Low-quality | 22.38 |
| Sample_C2B_k141_184343             | 7728   | 14  | 12 | 0  | Low-quality | 22.37 |
| Sample_C3A_k141_2771_fragment_1    | 10662  | 12  | 2  | 2  | Low-quality | 22.37 |
| Sample_T14C_k141_3794              | 10077  | 13  | 7  | 0  | Low-quality | 22.36 |
| Sample_T12A_k141_212489            | 11168  | 9   | 0  | 5  | Low-quality | 22.35 |
| Sample_C3A_k141_194155             | 8874   | 7   | 0  | 0  | Low-quality | 22.33 |
| Sample_C4B_k141_198026             | 7743   | 3   | 0  | 2  | Low-quality | 22.33 |
| Sample_T13A_k141_75087             | 13552  | 14  | 4  | 0  | Low-quality | 22.33 |
| Sample_T18C_k141_136521            | 10377  | 10  | 0  | 3  | Low-quality | 22.32 |
| Sample_T8C_k141_147336             | 9407   | 14  | 7  | 0  | Low-quality | 22.32 |
| Sample_T12A_k141_4301              | 14634  | 20  | 4  | 3  | Low-quality | 22.31 |
| Sample_T16B_k141_38496             | 55336  | 46  | 1  | 40 | Low-quality | 22.3  |
| Sample_T3A_k141_27831              | 12182  | 13  | 0  | 1  | Low-quality | 22.3  |
| Sample_T14A_k141_4806_fragment_1   | 11132  | 16  | 1  | 2  | Low-quality | 22.3  |
| Sample_C10C_k141_113833            | 8918   | 14  | 3  | 1  | Low-quality | 22.29 |
| Sample_C13A_k141_78542             | 21115  | 34  | 3  | 1  | Low-quality | 22.29 |
| Sample_C2A_k141_22607              | 9253   | 10  | 3  | 0  | Low-quality | 22.28 |
| Sample_T13B_k141_173696_fragment_1 | 18427  | 30  | 4  | 3  | Low-quality | 22.28 |
| Sample_T3A_k141_412                | 8265   | 8   | 0  | 1  | Low-quality | 22.27 |

|                                    |       |    |   |    |             |       |
|------------------------------------|-------|----|---|----|-------------|-------|
| Sample_C3C_k141_231277             | 8811  | 13 | 5 | 0  | Low-quality | 22.27 |
| Sample_T7A_k141_45264              | 14587 | 35 | 1 | 0  | Low-quality | 22.27 |
| Sample_C11A_k141_99795             | 14711 | 21 | 1 | 4  | Low-quality | 22.26 |
| Sample_C9A_k141_68769              | 8787  | 12 | 0 | 1  | Low-quality | 22.26 |
| Sample_T3C_k141_58184              | 10564 | 18 | 2 | 2  | Low-quality | 22.26 |
| Sample_C10C_k141_173936_fragment_1 | 11559 | 13 | 1 | 1  | Low-quality | 22.25 |
| Sample_C6B_k141_173265_fragment_1  | 10138 | 15 | 7 | 2  | Low-quality | 22.25 |
| Sample_T13B_k141_145153            | 16506 | 20 | 0 | 5  | Low-quality | 22.24 |
| Sample_T7A_k141_46156_fragment_1   | 18038 | 16 | 1 | 7  | Low-quality | 22.22 |
| Sample_C10A_k141_218421            | 9382  | 13 | 5 | 0  | Low-quality | 22.21 |
| Sample_C8C_k141_140929             | 8258  | 14 | 2 | 0  | Low-quality | 22.21 |
| Sample_T10A_k141_108177            | 24488 | 26 | 8 | 5  | Low-quality | 22.2  |
| Sample_T13B_k141_105602            | 13294 | 17 | 0 | 3  | Low-quality | 22.2  |
| Sample_C2A_k141_250921             | 9320  | 2  | 0 | 0  | Low-quality | 22.19 |
| Sample_T11B_k141_115919            | 24225 | 23 | 0 | 10 | Low-quality | 22.19 |
| Sample_T4A_k141_86226              | 13283 | 13 | 0 | 6  | Low-quality | 22.19 |
| Sample_T6C_k141_266395             | 10308 | 9  | 0 | 5  | Low-quality | 22.19 |
| Sample_T15C_k141_66291             | 14663 | 18 | 1 | 1  | Low-quality | 22.19 |
| Sample_T8C_k141_108344             | 15253 | 17 | 0 | 4  | Low-quality | 22.18 |
| Sample_C3C_k141_265359_fragment_1  | 10380 | 15 | 4 | 0  | Low-quality | 22.18 |
| Sample_T16A_k141_17862             | 12038 | 21 | 4 | 1  | Low-quality | 22.17 |
| Sample_T8A_k141_45092              | 12122 | 25 | 5 | 0  | Low-quality | 22.17 |
| Sample_T11A_k141_73852             | 18107 | 13 | 0 | 6  | Low-quality | 22.16 |
| Sample_T4B_k141_123848             | 8776  | 8  | 0 | 1  | Low-quality | 22.15 |
| Sample_T4B_k141_152614             | 8170  | 13 | 4 | 0  | Low-quality | 22.15 |
| Sample_C1C_k141_142144             | 11697 | 17 | 1 | 3  | Low-quality | 22.14 |
| Sample_T6C_k141_27112              | 13660 | 17 | 1 | 12 | Low-quality | 22.14 |
| Sample_C11C_k141_160669            | 10425 | 13 | 1 | 0  | Low-quality | 22.14 |
| Sample_C4B_k141_124581             | 10175 | 19 | 8 | 0  | Low-quality | 22.14 |
| Sample_C3B_k141_173466             | 12838 | 17 | 1 | 0  | Low-quality | 22.13 |
| Sample_T2B_k141_232977             | 10576 | 13 | 5 | 0  | Low-quality | 22.13 |
| Sample_T13B_k141_136190            | 13242 | 18 | 0 | 5  | Low-quality | 22.12 |
| Sample_C7A_k141_100287             | 14526 | 23 | 2 | 1  | Low-quality | 22.12 |
| Sample_T10A_k141_165280            | 8112  | 16 | 4 | 1  | Low-quality | 22.12 |
| Sample_T2C_k141_13380              | 9013  | 14 | 6 | 0  | Low-quality | 22.12 |
| Sample_T11B_k141_17077             | 9667  | 14 | 2 | 0  | Low-quality | 22.11 |
| Sample_C14B_k141_10969             | 10055 | 17 | 1 | 3  | Low-quality | 22.1  |
| Sample_T16B_k141_114761            | 14602 | 17 | 1 | 5  | Low-quality | 22.09 |
| Sample_T7A_k141_143806             | 7563  | 10 | 3 | 0  | Low-quality | 22.09 |

|                                   |        |     |    |    |             |       |
|-----------------------------------|--------|-----|----|----|-------------|-------|
| Sample_C11C_k141_100606           | 34980  | 32  | 2  | 4  | Low-quality | 22.08 |
| Sample_T5C_k141_123712            | 19862  | 18  | 0  | 3  | Low-quality | 22.07 |
| Sample_T5C_k141_84640             | 11729  | 16  | 1  | 1  | Low-quality | 22.06 |
| Sample_T2C_k141_39462             | 17050  | 22  | 1  | 7  | Low-quality | 22.05 |
| Sample_C8B_k141_170213            | 8855   | 6   | 1  | 0  | Low-quality | 22.05 |
| Sample_T4B_k141_2328_fragment_1   | 34989  | 42  | 2  | 1  | Low-quality | 22.05 |
| Sample_T12A_k141_122183           | 9442   | 2   | 0  | 0  | Low-quality | 22.04 |
| Sample_T6C_k141_56233             | 29089  | 27  | 11 | 5  | Low-quality | 22.04 |
| Sample_C3B_k141_265128            | 16480  | 29  | 2  | 4  | Low-quality | 22.03 |
| Sample_C4A_k141_256027            | 23769  | 20  | 0  | 8  | Low-quality | 22.03 |
| Sample_C3B_k141_107484            | 8942   | 12  | 7  | 0  | Low-quality | 22.03 |
| Sample_C10A_k141_114867           | 170073 | 175 | 4  | 96 | Low-quality | 22.02 |
| Sample_T10C_k141_32003            | 35036  | 41  | 1  | 4  | Low-quality | 22.02 |
| Sample_C3C_k141_51447             | 12684  | 22  | 3  | 1  | Low-quality | 22.02 |
| Sample_T12A_k141_158778           | 8517   | 15  | 8  | 0  | Low-quality | 22.02 |
| Sample_T5B_k141_36543             | 9082   | 14  | 1  | 0  | Low-quality | 22.02 |
| Sample_C10A_k141_106008           | 9797   | 15  | 7  | 0  | Low-quality | 22    |
| Sample_T6A_k141_122451            | 7234   | 15  | 4  | 0  | Low-quality | 22    |
| Sample_T8B_k141_189351            | 8771   | 17  | 8  | 2  | Low-quality | 22    |
| Sample_T8C_k141_101288            | 8403   | 12  | 5  | 0  | Low-quality | 22    |
| Sample_C4A_k141_212597            | 9249   | 4   | 0  | 4  | Low-quality | 21.97 |
| Sample_C6A_k141_211994            | 36123  | 31  | 1  | 16 | Low-quality | 21.97 |
| Sample_T2B_k141_280960            | 27084  | 15  | 1  | 5  | Low-quality | 21.97 |
| Sample_C3C_k141_50992             | 12652  | 20  | 3  | 1  | Low-quality | 21.97 |
| Sample_T11A_k141_93360            | 9130   | 10  | 0  | 1  | Low-quality | 21.96 |
| Sample_C6B_k141_170659            | 8901   | 7   | 0  | 1  | Low-quality | 21.95 |
| Sample_T16B_k141_64624            | 8214   | 12  | 12 | 0  | Low-quality | 21.95 |
| Sample_T7C_k141_118052            | 13064  | 13  | 5  | 0  | Low-quality | 21.94 |
| Sample_T18A_k141_192611           | 9283   | 9   | 0  | 2  | Low-quality | 21.93 |
| Sample_C2B_k141_131729            | 34164  | 55  | 1  | 41 | Low-quality | 21.89 |
| Sample_C1A_k141_21252             | 9195   | 12  | 0  | 5  | Low-quality | 21.88 |
| Sample_T8B_k141_253481            | 14777  | 7   | 2  | 1  | Low-quality | 21.87 |
| Sample_C10C_k141_38460            | 9253   | 17  | 1  | 1  | Low-quality | 21.87 |
| Sample_C9A_k141_123893            | 8421   | 15  | 3  | 0  | Low-quality | 21.87 |
| Sample_T12B_k141_126946           | 17156  | 21  | 0  | 4  | Low-quality | 21.86 |
| Sample_C13A_k141_60262_fragment_1 | 22000  | 32  | 4  | 2  | Low-quality | 21.86 |
| Sample_T3B_k141_111349            | 10407  | 16  | 5  | 0  | Low-quality | 21.86 |
| Sample_C3A_k141_234962            | 11602  | 15  | 5  | 0  | Low-quality | 21.85 |
| Sample_T12A_k141_91764_fragment_1 | 11684  | 16  | 1  | 0  | Low-quality | 21.85 |

|                         |       |    |    |    |             |       |
|-------------------------|-------|----|----|----|-------------|-------|
| Sample_C10C_k141_203153 | 21374 | 21 | 0  | 5  | Low-quality | 21.83 |
| Sample_C1C_k141_82721   | 43769 | 49 | 2  | 11 | Low-quality | 21.83 |
| Sample_C6A_k141_31766   | 54931 | 50 | 1  | 19 | Low-quality | 21.83 |
| Sample_C3A_k141_166746  | 15953 | 18 | 1  | 4  | Low-quality | 21.82 |
| Sample_C13A_k141_32861  | 7288  | 8  | 1  | 0  | Low-quality | 21.82 |
| Sample_C8C_k141_50166   | 9385  | 11 | 0  | 1  | Low-quality | 21.82 |
| Sample_T8C_k141_98486   | 10061 | 13 | 10 | 1  | Low-quality | 21.82 |
| Sample_T13B_k141_142894 | 9320  | 6  | 0  | 2  | Low-quality | 21.81 |
| Sample_T17C_k141_13901  | 23575 | 30 | 0  | 21 | Low-quality | 21.8  |
| Sample_C6A_k141_6027    | 13574 | 20 | 3  | 0  | Low-quality | 21.8  |
| Sample_C6C_k141_121437  | 38048 | 30 | 0  | 23 | Low-quality | 21.79 |
| Sample_T3A_k141_100887  | 11916 | 16 | 8  | 0  | Low-quality | 21.78 |
| Sample_T7A_k141_84882   | 13527 | 22 | 3  | 0  | Low-quality | 21.78 |
| Sample_T13C_k141_65146  | 11005 | 10 | 2  | 2  | Low-quality | 21.76 |
| Sample_T18C_k141_2885   | 15928 | 19 | 0  | 4  | Low-quality | 21.76 |
| Sample_T18C_k141_82759  | 10863 | 10 | 1  | 6  | Low-quality | 21.76 |
| Sample_T8C_k141_96748   | 15076 | 33 | 9  | 0  | Low-quality | 21.75 |
| Sample_C13C_k141_70773  | 18639 | 14 | 1  | 4  | Low-quality | 21.74 |
| Sample_T10B_k141_96368  | 12559 | 25 | 4  | 1  | Low-quality | 21.74 |
| Sample_T3B_k141_113111  | 10318 | 9  | 0  | 1  | Low-quality | 21.73 |
| Sample_T7A_k141_143952  | 8688  | 11 | 0  | 0  | Low-quality | 21.73 |
| Sample_C2A_k141_113193  | 9435  | 12 | 5  | 0  | Low-quality | 21.73 |
| Sample_T11A_k141_54101  | 15444 | 15 | 1  | 5  | Low-quality | 21.72 |
| Sample_T7A_k141_128625  | 8399  | 9  | 0  | 4  | Low-quality | 21.72 |
| Sample_C4A_k141_175205  | 7945  | 11 | 2  | 0  | Low-quality | 21.72 |
| Sample_T7C_k141_63787   | 9790  | 17 | 6  | 0  | Low-quality | 21.72 |
| Sample_C14B_k141_65750  | 17537 | 22 | 1  | 7  | Low-quality | 21.71 |
| Sample_T5B_k141_73834   | 8801  | 14 | 2  | 0  | Low-quality | 21.71 |
| Sample_T15B_k141_103685 | 8071  | 13 | 4  | 0  | Low-quality | 21.71 |
| Sample_C4C_k141_68651   | 14192 | 19 | 0  | 4  | Low-quality | 21.68 |
| Sample_T11C_k141_135623 | 8747  | 18 | 4  | 0  | Low-quality | 21.68 |
| Sample_C8A_k141_171387  | 14322 | 11 | 1  | 5  | Low-quality | 21.67 |
| Sample_C12A_k141_165183 | 8906  | 8  | 8  | 0  | Low-quality | 21.67 |
| Sample_C4C_k141_190473  | 7388  | 12 | 1  | 0  | Low-quality | 21.67 |
| Sample_C11A_k141_118116 | 18765 | 11 | 0  | 4  | Low-quality | 21.65 |
| Sample_C8B_k141_77918   | 8369  | 11 | 1  | 1  | Low-quality | 21.64 |
| Sample_C11C_k141_56192  | 23381 | 15 | 0  | 9  | Low-quality | 21.63 |
| Sample_C9A_k141_38607   | 20688 | 25 | 0  | 3  | Low-quality | 21.63 |
| Sample_T14B_k141_95693  | 14114 | 13 | 0  | 11 | Low-quality | 21.63 |

|                                   |       |    |    |    |             |       |
|-----------------------------------|-------|----|----|----|-------------|-------|
| Sample_C11C_k141_7354             | 9496  | 13 | 4  | 0  | Low-quality | 21.62 |
| Sample_T18C_k141_151691           | 22682 | 32 | 4  | 0  | Low-quality | 21.6  |
| Sample_T2C_k141_54216             | 6193  | 7  | 1  | 0  | Low-quality | 21.59 |
| Sample_C8C_k141_24929             | 16780 | 17 | 0  | 2  | Low-quality | 21.58 |
| Sample_C10B_k141_82873            | 13341 | 8  | 3  | 0  | Low-quality | 21.58 |
| Sample_T17A_k141_6310             | 12433 | 15 | 3  | 1  | Low-quality | 21.58 |
| Sample_T8A_k141_59980             | 12276 | 15 | 4  | 0  | Low-quality | 21.58 |
| Sample_C2B_k141_8048              | 31381 | 37 | 2  | 23 | Low-quality | 21.57 |
| Sample_T16B_k141_131320           | 9424  | 10 | 1  | 3  | Low-quality | 21.57 |
| Sample_C6A_k141_208900            | 9087  | 25 | 4  | 1  | Low-quality | 21.57 |
| Sample_C7C_k141_99528             | 10515 | 13 | 1  | 2  | Low-quality | 21.56 |
| Sample_T6A_k141_125995            | 10775 | 9  | 0  | 6  | Low-quality | 21.56 |
| Sample_C1B_k141_175299            | 15861 | 8  | 0  | 0  | Low-quality | 21.56 |
| Sample_C9A_k141_9771              | 9959  | 17 | 11 | 0  | Low-quality | 21.56 |
| Sample_C11C_k141_26870            | 12082 | 21 | 2  | 10 | Low-quality | 21.55 |
| Sample_T3C_k141_106650            | 14245 | 24 | 1  | 2  | Low-quality | 21.55 |
| Sample_C13C_k141_22589            | 14233 | 17 | 1  | 4  | Low-quality | 21.54 |
| Sample_T17B_k141_2547             | 7650  | 6  | 3  | 1  | Low-quality | 21.54 |
| Sample_C4C_k141_84506             | 8329  | 9  | 1  | 0  | Low-quality | 21.53 |
| Sample_C5A_k141_262915            | 7740  | 14 | 6  | 2  | Low-quality | 21.53 |
| Sample_T13B_k141_62812            | 11980 | 14 | 0  | 9  | Low-quality | 21.52 |
| Sample_T8A_k141_215318            | 9045  | 17 | 0  | 16 | Low-quality | 21.52 |
| Sample_T15B_k141_88344            | 8656  | 10 | 5  | 0  | Low-quality | 21.52 |
| Sample_T4A_k141_108735_fragment_1 | 8682  | 13 | 2  | 0  | Low-quality | 21.52 |
| Sample_T14A_k141_9051             | 16637 | 18 | 0  | 9  | Low-quality | 21.51 |
| Sample_T2B_k141_18983             | 7925  | 9  | 4  | 0  | Low-quality | 21.51 |
| Sample_T7A_k141_206921            | 21570 | 18 | 0  | 9  | Low-quality | 21.5  |
| Sample_C8C_k141_118142            | 8159  | 15 | 1  | 1  | Low-quality | 21.5  |
| Sample_C1A_k141_251871            | 25455 | 25 | 2  | 8  | Low-quality | 21.48 |
| Sample_C12C_k141_187310           | 8987  | 10 | 2  | 0  | Low-quality | 21.48 |
| Sample_T10A_k141_4708             | 8578  | 14 | 8  | 0  | Low-quality | 21.48 |
| Sample_T6A_k141_112461            | 6192  | 7  | 0  | 2  | Low-quality | 21.46 |
| Sample_C1C_k141_7424              | 8748  | 19 | 3  | 1  | Low-quality | 21.46 |
| Sample_T14A_k141_48381            | 19305 | 17 | 0  | 4  | Low-quality | 21.45 |
| Sample_C4B_k141_222991            | 17911 | 24 | 6  | 3  | Low-quality | 21.45 |
| Sample_T4B_k141_186770            | 7715  | 8  | 0  | 0  | Low-quality | 21.45 |
| Sample_C5A_k141_41011             | 21171 | 24 | 3  | 1  | Low-quality | 21.44 |
| Sample_T11A_k141_72044            | 8062  | 10 | 4  | 0  | Low-quality | 21.44 |
| Sample_T4B_k141_84320             | 65807 | 43 | 1  | 25 | Low-quality | 21.43 |

|                                   |       |    |    |    |             |       |
|-----------------------------------|-------|----|----|----|-------------|-------|
| Sample_T8B_k141_273790            | 18018 | 28 | 2  | 2  | Low-quality | 21.43 |
| Sample_C10A_k141_228133           | 7717  | 15 | 1  | 1  | Low-quality | 21.43 |
| Sample_C12B_k141_58745            | 7632  | 16 | 0  | 0  | Low-quality | 21.43 |
| Sample_T2B_k141_242611            | 9298  | 18 | 8  | 0  | Low-quality | 21.43 |
| Sample_C6C_k141_134206            | 20189 | 13 | 0  | 3  | Low-quality | 21.42 |
| Sample_T13B_k141_43681            | 8323  | 9  | 0  | 0  | Low-quality | 21.42 |
| Sample_C4A_k141_83991             | 9228  | 15 | 1  | 0  | Low-quality | 21.42 |
| Sample_T7A_k141_161016            | 17983 | 18 | 1  | 2  | Low-quality | 21.41 |
| Sample_T8A_k141_84220             | 9739  | 9  | 2  | 0  | Low-quality | 21.41 |
| Sample_C8B_k141_81913             | 12340 | 24 | 2  | 0  | Low-quality | 21.4  |
| Sample_T15C_k141_43509            | 14706 | 21 | 0  | 0  | Low-quality | 21.4  |
| Sample_C11A_k141_45691            | 17963 | 24 | 1  | 6  | Low-quality | 21.39 |
| Sample_T4A_k141_86752             | 12792 | 17 | 1  | 6  | Low-quality | 21.37 |
| Sample_C1A_k141_210645            | 17590 | 18 | 0  | 1  | Low-quality | 21.36 |
| Sample_C6C_k141_35296             | 5619  | 3  | 1  | 0  | Low-quality | 21.36 |
| Sample_C7B_k141_61064             | 14114 | 11 | 1  | 5  | Low-quality | 21.36 |
| Sample_T10A_k141_85849            | 35092 | 36 | 1  | 19 | Low-quality | 21.36 |
| Sample_T8B_k141_198011            | 8262  | 3  | 1  | 0  | Low-quality | 21.36 |
| Sample_C6C_k141_34341             | 8329  | 12 | 10 | 0  | Low-quality | 21.36 |
| Sample_C9B_k141_100782            | 12368 | 20 | 4  | 1  | Low-quality | 21.36 |
| Sample_T5C_k141_99228             | 8129  | 16 | 5  | 0  | Low-quality | 21.36 |
| Sample_T7B_k141_89503             | 54964 | 69 | 3  | 1  | Low-quality | 21.36 |
| Sample_T12A_k141_267831           | 10532 | 12 | 6  | 0  | Low-quality | 21.34 |
| Sample_T6A_k141_158299            | 7866  | 8  | 3  | 0  | Low-quality | 21.34 |
| Sample_T8A_k141_87050             | 8717  | 17 | 1  | 0  | Low-quality | 21.34 |
| Sample_C14A_k141_142194           | 7271  | 10 | 5  | 0  | Low-quality | 21.33 |
| Sample_C4C_k141_155391            | 7800  | 11 | 7  | 0  | Low-quality | 21.33 |
| Sample_C9A_k141_10209             | 8869  | 10 | 0  | 2  | Low-quality | 21.32 |
| Sample_C9C_k141_35699             | 33647 | 35 | 1  | 10 | Low-quality | 21.32 |
| Sample_T6B_k141_63878             | 21133 | 17 | 0  | 15 | Low-quality | 21.32 |
| Sample_C4C_k141_251532            | 9008  | 9  | 1  | 0  | Low-quality | 21.32 |
| Sample_C10A_k141_198079           | 16708 | 15 | 0  | 6  | Low-quality | 21.31 |
| Sample_C7A_k141_54475             | 31708 | 35 | 1  | 11 | Low-quality | 21.31 |
| Sample_T12A_k141_135189           | 52449 | 56 | 1  | 17 | Low-quality | 21.3  |
| Sample_T13A_k141_36391            | 7974  | 16 | 0  | 1  | Low-quality | 21.3  |
| Sample_T16B_k141_42843            | 6110  | 9  | 4  | 0  | Low-quality | 21.3  |
| Sample_C10C_k141_99205            | 12738 | 15 | 0  | 6  | Low-quality | 21.28 |
| Sample_T2B_k141_294003_fragment_2 | 9182  | 10 | 0  | 2  | Low-quality | 21.28 |
| Sample_T6A_k141_135274            | 20101 | 16 | 0  | 2  | Low-quality | 21.27 |

|                                    |        |    |    |    |             |       |
|------------------------------------|--------|----|----|----|-------------|-------|
| Sample_C8C_k141_158517_fragment_1  | 7976   | 14 | 5  | 0  | Low-quality | 21.27 |
| Sample_C4B_k141_184986_fragment_1  | 8742   | 16 | 3  | 0  | Low-quality | 21.26 |
| Sample_C3C_k141_136358             | 11839  | 14 | 0  | 1  | Low-quality | 21.23 |
| Sample_T7A_k141_191249             | 13721  | 20 | 0  | 4  | Low-quality | 21.22 |
| Sample_C2B_k141_70704              | 10702  | 10 | 0  | 1  | Low-quality | 21.21 |
| Sample_C3A_k141_256660             | 9839   | 16 | 9  | 0  | Low-quality | 21.21 |
| Sample_T10B_k141_162947            | 13699  | 25 | 6  | 1  | Low-quality | 21.21 |
| Sample_T2A_k141_236653             | 10398  | 10 | 0  | 4  | Low-quality | 21.2  |
| Sample_C9A_k141_100000             | 22428  | 24 | 0  | 9  | Low-quality | 21.19 |
| Sample_C14A_k141_158112_fragment_2 | 13823  | 19 | 3  | 2  | Low-quality | 21.19 |
| Sample_C3B_k141_45641              | 12682  | 14 | 0  | 2  | Low-quality | 21.18 |
| Sample_T15C_k141_105834            | 17284  | 22 | 2  | 5  | Low-quality | 21.18 |
| Sample_C4A_k141_162997             | 15608  | 23 | 4  | 3  | Low-quality | 21.18 |
| Sample_C7B_k141_77274              | 6075   | 4  | 0  | 2  | Low-quality | 21.17 |
| Sample_T18C_k141_16091             | 16337  | 17 | 0  | 4  | Low-quality | 21.17 |
| Sample_T7A_k141_79866              | 10906  | 10 | 1  | 3  | Low-quality | 21.17 |
| Sample_C5A_k141_123587             | 9385   | 16 | 8  | 0  | Low-quality | 21.17 |
| Sample_C7C_k141_91282_fragment_1   | 36937  | 31 | 7  | 5  | Low-quality | 21.17 |
| Sample_C11B_k141_243587_fragment_1 | 14819  | 20 | 8  | 0  | Low-quality | 21.15 |
| Sample_C1C_k141_744_fragment_1     | 8946   | 15 | 3  | 0  | Low-quality | 21.15 |
| Sample_T16B_k141_155189_fragment_4 | 10275  | 19 | 3  | 0  | Low-quality | 21.15 |
| Sample_C9A_k141_19901              | 8696   | 6  | 3  | 1  | Low-quality | 21.14 |
| Sample_T11C_k141_53803             | 9790   | 8  | 6  | 0  | Low-quality | 21.14 |
| Sample_C6C_k141_4714               | 7980   | 19 | 1  | 0  | Low-quality | 21.12 |
| Sample_T13B_k141_166188            | 7831   | 14 | 6  | 0  | Low-quality | 21.11 |
| Sample_T14C_k141_146979            | 16419  | 11 | 0  | 3  | Low-quality | 21.1  |
| Sample_T17C_k141_26971             | 10045  | 16 | 10 | 0  | Low-quality | 21.1  |
| Sample_C13A_k141_46005             | 8760   | 12 | 9  | 0  | Low-quality | 21.09 |
| Sample_T14B_k141_69582             | 7877   | 14 | 1  | 0  | Low-quality | 21.08 |
| Sample_T2C_k141_111022             | 115437 | 86 | 1  | 56 | Low-quality | 21.08 |
| Sample_C12B_k141_82196             | 11271  | 14 | 12 | 0  | Low-quality | 21.08 |
| Sample_T7A_k141_61397_fragment_1   | 8327   | 14 | 3  | 0  | Low-quality | 21.08 |
| Sample_T18A_k141_116346            | 9000   | 10 | 0  | 5  | Low-quality | 21.07 |
| Sample_T2C_k141_67019              | 52274  | 37 | 1  | 26 | Low-quality | 21.07 |
| Sample_C6B_k141_82893              | 9002   | 12 | 1  | 1  | Low-quality | 21.07 |
| Sample_T17B_k141_19388             | 18983  | 33 | 12 | 0  | Low-quality | 21.06 |
| Sample_T3A_k141_47953              | 19707  | 13 | 1  | 10 | Low-quality | 21.05 |
| Sample_T6C_k141_4873               | 13486  | 16 | 0  | 6  | Low-quality | 21.05 |
| Sample_T16A_k141_92405             | 11299  | 26 | 6  | 2  | Low-quality | 21.05 |



|                                   |       |    |    |    |             |       |
|-----------------------------------|-------|----|----|----|-------------|-------|
| Sample_T7A_k141_144063            | 12187 | 11 | 0  | 1  | Low-quality | 21.04 |
| Sample_T6C_k141_256258            | 12817 | 16 | 7  | 0  | Low-quality | 21.04 |
| Sample_T17A_k141_51366            | 13338 | 12 | 0  | 3  | Low-quality | 21.02 |
| Sample_C3A_k141_55238             | 9627  | 15 | 1  | 0  | Low-quality | 21.02 |
| Sample_T2A_k141_155543            | 16577 | 11 | 0  | 4  | Low-quality | 21    |
| Sample_T6B_k141_188762            | 8969  | 14 | 1  | 2  | Low-quality | 21    |
| Sample_T8A_k141_134147            | 11788 | 13 | 0  | 7  | Low-quality | 21    |
| Sample_T7C_k141_31415             | 8538  | 10 | 5  | 0  | Low-quality | 21    |
| Sample_C6B_k141_97600             | 10243 | 12 | 1  | 3  | Low-quality | 20.99 |
| Sample_C8C_k141_28463             | 8149  | 6  | 0  | 1  | Low-quality | 20.99 |
| Sample_T16B_k141_139081           | 11204 | 13 | 1  | 7  | Low-quality | 20.99 |
| Sample_C13C_k141_102304           | 10469 | 23 | 15 | 0  | Low-quality | 20.99 |
| Sample_C11C_k141_98095            | 23349 | 18 | 0  | 6  | Low-quality | 20.98 |
| Sample_T11C_k141_23351            | 37698 | 34 | 0  | 22 | Low-quality | 20.98 |
| Sample_C10C_k141_212120           | 7653  | 10 | 5  | 0  | Low-quality | 20.98 |
| Sample_C12B_k141_140539           | 55178 | 28 | 6  | 0  | Low-quality | 20.98 |
| Sample_T2A_k141_91592             | 51616 | 47 | 1  | 6  | Low-quality | 20.96 |
| Sample_C7B_k141_82335             | 7941  | 14 | 5  | 0  | Low-quality | 20.95 |
| Sample_T3A_k141_104098            | 11058 | 15 | 5  | 0  | Low-quality | 20.95 |
| Sample_T6B_k141_171181            | 10454 | 20 | 1  | 3  | Low-quality | 20.94 |
| Sample_C5A_k141_118303            | 11673 | 7  | 0  | 1  | Low-quality | 20.93 |
| Sample_T4A_k141_42274             | 11652 | 11 | 0  | 9  | Low-quality | 20.93 |
| Sample_C10A_k141_78241_fragment_1 | 8720  | 8  | 4  | 0  | Low-quality | 20.93 |
| Sample_C10A_k141_334218           | 7006  | 10 | 7  | 0  | Low-quality | 20.93 |
| Sample_C3A_k141_216193            | 8769  | 21 | 4  | 1  | Low-quality | 20.93 |
| Sample_C6B_k141_126922            | 9842  | 16 | 11 | 0  | Low-quality | 20.93 |
| Sample_T10A_k141_64503            | 8451  | 11 | 3  | 0  | Low-quality | 20.93 |
| Sample_T5C_k141_27259             | 10017 | 14 | 10 | 0  | Low-quality | 20.93 |
| Sample_C1B_k141_16601             | 20596 | 19 | 0  | 15 | Low-quality | 20.92 |
| Sample_C9B_k141_84635_fragment_3  | 32875 | 31 | 8  | 0  | Low-quality | 20.92 |
| Sample_T11C_k141_31601            | 13757 | 19 | 1  | 1  | Low-quality | 20.92 |
| Sample_C12B_k141_151653           | 7474  | 5  | 4  | 1  | Low-quality | 20.91 |
| Sample_T8B_k141_39977             | 21624 | 19 | 0  | 12 | Low-quality | 20.91 |
| Sample_C12C_k141_160452           | 10667 | 6  | 1  | 0  | Low-quality | 20.9  |
| Sample_C9B_k141_2023              | 8549  | 9  | 2  | 1  | Low-quality | 20.89 |
| Sample_C9C_k141_45905_fragment_1  | 7622  | 16 | 6  | 0  | Low-quality | 20.89 |
| Sample_T15A_k141_128576           | 33095 | 31 | 1  | 4  | Low-quality | 20.88 |
| Sample_T8C_k141_115247            | 15532 | 17 | 1  | 1  | Low-quality | 20.87 |
| Sample_C10A_k141_277038           | 14524 | 16 | 2  | 8  | Low-quality | 20.86 |

|                                   |       |    |    |    |             |       |
|-----------------------------------|-------|----|----|----|-------------|-------|
| Sample_C2A_k141_40914             | 6016  | 7  | 0  | 1  | Low-quality | 20.85 |
| Sample_T16B_k141_171313           | 9693  | 7  | 0  | 4  | Low-quality | 20.85 |
| Sample_T2B_k141_74898             | 12515 | 13 | 1  | 3  | Low-quality | 20.85 |
| Sample_T4B_k141_230036            | 22895 | 23 | 1  | 3  | Low-quality | 20.85 |
| Sample_C12A_k141_119019           | 8862  | 20 | 2  | 0  | Low-quality | 20.84 |
| Sample_C4C_k141_63161             | 7948  | 7  | 0  | 1  | Low-quality | 20.84 |
| Sample_C9B_k141_24829             | 9233  | 9  | 6  | 0  | Low-quality | 20.84 |
| Sample_T3C_k141_67717             | 12703 | 27 | 7  | 0  | Low-quality | 20.84 |
| Sample_C9C_k141_88505             | 30514 | 32 | 2  | 5  | Low-quality | 20.83 |
| Sample_T5C_k141_61185             | 8819  | 12 | 0  | 1  | Low-quality | 20.83 |
| Sample_T7B_k141_88009             | 11982 | 13 | 0  | 1  | Low-quality | 20.83 |
| Sample_C4A_k141_6509              | 9854  | 15 | 11 | 0  | Low-quality | 20.83 |
| Sample_C4B_k141_182941            | 8251  | 5  | 0  | 4  | Low-quality | 20.82 |
| Sample_C5C_k141_88129             | 51673 | 41 | 1  | 24 | Low-quality | 20.82 |
| Sample_C10A_k141_142023           | 20515 | 26 | 1  | 2  | Low-quality | 20.82 |
| Sample_C6A_k141_98677             | 7649  | 15 | 4  | 0  | Low-quality | 20.82 |
| Sample_C3A_k141_55385             | 6854  | 6  | 3  | 0  | Low-quality | 20.81 |
| Sample_C11A_k141_3986             | 12453 | 16 | 0  | 4  | Low-quality | 20.8  |
| Sample_C4C_k141_201577            | 26177 | 31 | 1  | 6  | Low-quality | 20.8  |
| Sample_T6B_k141_132069            | 8774  | 9  | 1  | 0  | Low-quality | 20.79 |
| Sample_T12A_k141_255625           | 9986  | 19 | 5  | 0  | Low-quality | 20.79 |
| Sample_T3B_k141_138732            | 9730  | 12 | 6  | 0  | Low-quality | 20.79 |
| Sample_C12B_k141_28367            | 15641 | 13 | 0  | 4  | Low-quality | 20.78 |
| Sample_C4A_k141_161345            | 9660  | 8  | 0  | 3  | Low-quality | 20.78 |
| Sample_C7C_k141_58638             | 19745 | 13 | 1  | 4  | Low-quality | 20.78 |
| Sample_C3B_k141_92949             | 9073  | 15 | 3  | 0  | Low-quality | 20.78 |
| Sample_C4A_k141_27379             | 21493 | 20 | 0  | 15 | Low-quality | 20.77 |
| Sample_C7A_k141_44684             | 10016 | 16 | 0  | 1  | Low-quality | 20.77 |
| Sample_T10A_k141_117047           | 7682  | 20 | 5  | 0  | Low-quality | 20.77 |
| Sample_T18C_k141_75015_fragment_1 | 13025 | 14 | 2  | 1  | Low-quality | 20.77 |
| Sample_T3A_k141_920               | 12593 | 14 | 5  | 0  | Low-quality | 20.77 |
| Sample_C2B_k141_228312            | 7507  | 8  | 6  | 0  | Low-quality | 20.76 |
| Sample_T14C_k141_61636            | 8859  | 19 | 3  | 0  | Low-quality | 20.76 |
| Sample_T17B_k141_21480            | 9175  | 12 | 1  | 0  | Low-quality | 20.76 |
| Sample_T18B_k141_6813             | 7246  | 8  | 7  | 0  | Low-quality | 20.76 |
| Sample_T17C_k141_29705            | 8768  | 12 | 9  | 0  | Low-quality | 20.75 |
| Sample_T12C_k141_37682            | 9644  | 9  | 0  | 3  | Low-quality | 20.74 |
| Sample_C7A_k141_114601            | 28790 | 35 | 1  | 7  | Low-quality | 20.74 |
| Sample_C8A_k141_60489_fragment_1  | 10219 | 12 | 0  | 0  | Low-quality | 20.74 |

|                                    |       |    |    |    |             |       |
|------------------------------------|-------|----|----|----|-------------|-------|
| Sample_C6B_k141_112089             | 18653 | 26 | 0  | 4  | Low-quality | 20.73 |
| Sample_T14C_k141_86892             | 51433 | 37 | 1  | 26 | Low-quality | 20.73 |
| Sample_T12C_k141_41629             | 43596 | 77 | 6  | 7  | Low-quality | 20.73 |
| Sample_T3B_k141_26804              | 7837  | 15 | 8  | 0  | Low-quality | 20.72 |
| Sample_T12A_k141_37532             | 24854 | 35 | 10 | 10 | Low-quality | 20.7  |
| Sample_C14B_k141_57035             | 5282  | 11 | 0  | 0  | Low-quality | 20.7  |
| Sample_C13A_k141_25377             | 12134 | 18 | 0  | 3  | Low-quality | 20.69 |
| Sample_C12C_k141_188620            | 8357  | 13 | 5  | 0  | Low-quality | 20.69 |
| Sample_C3B_k141_153438             | 13099 | 14 | 3  | 2  | Low-quality | 20.69 |
| Sample_T8C_k141_58133              | 7907  | 10 | 0  | 1  | Low-quality | 20.68 |
| Sample_C4A_k141_165467             | 13134 | 26 | 4  | 0  | Low-quality | 20.68 |
| Sample_T17C_k141_38059_fragment_1  | 8537  | 8  | 0  | 3  | Low-quality | 20.68 |
| Sample_C2B_k141_295347             | 8772  | 12 | 5  | 0  | Low-quality | 20.66 |
| Sample_C5A_k141_235018             | 8331  | 12 | 6  | 0  | Low-quality | 20.66 |
| Sample_T8A_k141_249501             | 13647 | 17 | 1  | 7  | Low-quality | 20.65 |
| Sample_T11C_k141_74626             | 22432 | 22 | 4  | 1  | Low-quality | 20.65 |
| Sample_T12B_k141_182195            | 12543 | 28 | 2  | 0  | Low-quality | 20.65 |
| Sample_C2A_k141_9479               | 7982  | 6  | 0  | 2  | Low-quality | 20.64 |
| Sample_T2C_k141_31136              | 32299 | 38 | 1  | 23 | Low-quality | 20.64 |
| Sample_C4C_k141_112474             | 13333 | 18 | 1  | 0  | Low-quality | 20.64 |
| Sample_C4C_k141_45696              | 7741  | 20 | 4  | 0  | Low-quality | 20.64 |
| Sample_T18C_k141_125424_fragment_2 | 9991  | 17 | 2  | 0  | Low-quality | 20.64 |
| Sample_T2B_k141_200159             | 9793  | 24 | 4  | 1  | Low-quality | 20.64 |
| Sample_C4B_k141_71444              | 31822 | 31 | 0  | 16 | Low-quality | 20.63 |
| Sample_T10B_k141_86537             | 50121 | 41 | 1  | 11 | Low-quality | 20.63 |
| Sample_T10A_k141_122844            | 9475  | 11 | 8  | 0  | Low-quality | 20.63 |
| Sample_T2B_k141_247257_fragment_1  | 7938  | 13 | 6  | 0  | Low-quality | 20.63 |
| Sample_T12A_k141_144530            | 42838 | 38 | 1  | 27 | Low-quality | 20.62 |
| Sample_T13C_k141_75478             | 11032 | 17 | 6  | 0  | Low-quality | 20.62 |
| Sample_T12A_k141_69728             | 14356 | 17 | 1  | 4  | Low-quality | 20.61 |
| Sample_C3B_k141_129913             | 19971 | 34 | 4  | 8  | Low-quality | 20.59 |
| Sample_C5A_k141_45920              | 19051 | 23 | 3  | 0  | Low-quality | 20.59 |
| Sample_T16B_k141_111171            | 17696 | 17 | 0  | 3  | Low-quality | 20.57 |
| Sample_C14A_k141_36003             | 7850  | 13 | 1  | 0  | Low-quality | 20.56 |
| Sample_C7C_k141_64706              | 8933  | 15 | 3  | 1  | Low-quality | 20.56 |
| Sample_T13B_k141_157572            | 8176  | 14 | 0  | 0  | Low-quality | 20.56 |
| Sample_T13B_k141_48017             | 7632  | 14 | 4  | 0  | Low-quality | 20.56 |
| Sample_T3B_k141_137229             | 8555  | 8  | 4  | 1  | Low-quality | 20.56 |
| Sample_T4C_k141_100821             | 8853  | 8  | 0  | 0  | Low-quality | 20.56 |

|                                    |       |    |    |    |             |       |
|------------------------------------|-------|----|----|----|-------------|-------|
| Sample_T8A_k141_80539              | 10666 | 13 | 0  | 2  | Low-quality | 20.55 |
| Sample_T4A_k141_105578             | 12380 | 17 | 11 | 0  | Low-quality | 20.55 |
| Sample_T8C_k141_73737              | 8416  | 18 | 5  | 0  | Low-quality | 20.55 |
| Sample_T15A_k141_109788            | 6246  | 9  | 0  | 0  | Low-quality | 20.54 |
| Sample_C1C_k141_191043_fragment_1  | 11952 | 9  | 0  | 1  | Low-quality | 20.54 |
| Sample_C8A_k141_160155             | 7424  | 12 | 1  | 0  | Low-quality | 20.54 |
| Sample_T13C_k141_22171             | 9927  | 19 | 3  | 1  | Low-quality | 20.53 |
| Sample_T2C_k141_261111             | 8793  | 18 | 1  | 1  | Low-quality | 20.53 |
| Sample_C10A_k141_172664            | 14994 | 16 | 1  | 2  | Low-quality | 20.52 |
| Sample_C10B_k141_97167             | 16545 | 27 | 7  | 2  | Low-quality | 20.51 |
| Sample_T2A_k141_121729             | 9195  | 19 | 2  | 0  | Low-quality | 20.51 |
| Sample_C14A_k141_105680            | 11200 | 14 | 6  | 2  | Low-quality | 20.5  |
| Sample_T6C_k141_122990             | 31833 | 24 | 1  | 15 | Low-quality | 20.49 |
| Sample_C10C_k141_26936_fragment_1  | 8558  | 15 | 3  | 0  | Low-quality | 20.49 |
| Sample_C11A_k141_130022_fragment_1 | 10682 | 17 | 1  | 0  | Low-quality | 20.49 |
| Sample_C9C_k141_11672              | 12108 | 13 | 3  | 1  | Low-quality | 20.49 |
| Sample_T12A_k141_85252             | 8520  | 9  | 5  | 0  | Low-quality | 20.49 |
| Sample_T15B_k141_14447             | 10463 | 13 | 12 | 0  | Low-quality | 20.49 |
| Sample_C2A_k141_257361             | 30592 | 36 | 8  | 1  | Low-quality | 20.48 |
| Sample_T2B_k141_35898              | 27695 | 36 | 14 | 0  | Low-quality | 20.46 |
| Sample_C10A_k141_95103             | 44213 | 34 | 0  | 29 | Low-quality | 20.45 |
| Sample_T5B_k141_3023               | 20552 | 15 | 0  | 7  | Low-quality | 20.45 |
| Sample_C11A_k141_9567              | 36614 | 59 | 9  | 0  | Low-quality | 20.44 |
| Sample_C12B_k141_151236            | 7211  | 17 | 5  | 0  | Low-quality | 20.44 |
| Sample_T14B_k141_109768            | 7302  | 17 | 3  | 0  | Low-quality | 20.44 |
| Sample_T16A_k141_102544            | 7225  | 10 | 8  | 0  | Low-quality | 20.44 |
| Sample_T12A_k141_83267             | 13547 | 26 | 5  | 0  | Low-quality | 20.43 |
| Sample_T8B_k141_125221_fragment_1  | 13456 | 30 | 8  | 2  | Low-quality | 20.43 |
| Sample_C14A_k141_123166            | 8341  | 10 | 5  | 0  | Low-quality | 20.4  |
| Sample_C10A_k141_140309            | 11882 | 11 | 1  | 5  | Low-quality | 20.39 |
| Sample_C5C_k141_18359              | 12209 | 15 | 1  | 2  | Low-quality | 20.39 |
| Sample_C10A_k141_97068             | 7617  | 16 | 0  | 0  | Low-quality | 20.39 |
| Sample_C11B_k141_246168            | 7616  | 13 | 6  | 0  | Low-quality | 20.38 |
| Sample_T8B_k141_46977              | 9325  | 11 | 2  | 0  | Low-quality | 20.38 |
| Sample_T14A_k141_8446              | 7225  | 13 | 5  | 0  | Low-quality | 20.37 |
| Sample_T14B_k141_207965            | 7601  | 9  | 6  | 0  | Low-quality | 20.37 |
| Sample_T6B_k141_156974             | 10083 | 16 | 0  | 6  | Low-quality | 20.36 |
| Sample_T8B_k141_3421               | 29441 | 41 | 9  | 0  | Low-quality | 20.36 |
| Sample_C13C_k141_92297             | 14766 | 15 | 0  | 6  | Low-quality | 20.35 |

|                                    |        |     |    |    |             |       |
|------------------------------------|--------|-----|----|----|-------------|-------|
| Sample_C7B_k141_91359              | 7151   | 10  | 8  | 0  | Low-quality | 20.34 |
| Sample_T10B_k141_171850_fragment_1 | 27828  | 26  | 2  | 0  | Low-quality | 20.34 |
| Sample_C13B_k141_37202             | 8542   | 9   | 0  | 6  | Low-quality | 20.33 |
| Sample_C1C_k141_79544              | 21853  | 26  | 0  | 5  | Low-quality | 20.33 |
| Sample_C2C_k141_253078             | 16136  | 12  | 0  | 2  | Low-quality | 20.33 |
| Sample_C10A_k141_111139            | 8839   | 14  | 1  | 0  | Low-quality | 20.33 |
| Sample_T11B_k141_118944            | 28189  | 38  | 1  | 8  | Low-quality | 20.31 |
| Sample_C12A_k141_100977            | 6613   | 8   | 2  | 0  | Low-quality | 20.3  |
| Sample_C9B_k141_32997              | 13131  | 21  | 5  | 0  | Low-quality | 20.3  |
| Sample_T11C_k141_153715            | 29280  | 39  | 2  | 1  | Low-quality | 20.29 |
| Sample_T6C_k141_221110             | 7923   | 5   | 1  | 0  | Low-quality | 20.29 |
| Sample_T10B_k141_53339             | 16703  | 17  | 10 | 0  | Low-quality | 20.29 |
| Sample_T2B_k141_316389             | 11153  | 20  | 9  | 0  | Low-quality | 20.28 |
| Sample_T4B_k141_289172             | 7201   | 9   | 2  | 0  | Low-quality | 20.27 |
| Sample_C5C_k141_66668_fragment_1   | 35961  | 43  | 1  | 9  | Low-quality | 20.27 |
| Sample_C10C_k141_80913             | 22550  | 19  | 0  | 6  | Low-quality | 20.26 |
| Sample_C4C_k141_72790              | 8183   | 6   | 0  | 1  | Low-quality | 20.26 |
| Sample_C11C_k141_28107             | 6175   | 9   | 5  | 0  | Low-quality | 20.26 |
| Sample_C7A_k141_168854             | 13383  | 16  | 1  | 2  | Low-quality | 20.25 |
| Sample_C7A_k141_132286             | 16112  | 20  | 0  | 8  | Low-quality | 20.25 |
| Sample_C10A_k141_257476            | 11418  | 14  | 0  | 0  | Low-quality | 20.25 |
| Sample_C8B_k141_42653              | 12057  | 14  | 4  | 0  | Low-quality | 20.25 |
| Sample_T12C_k141_143603            | 14016  | 21  | 2  | 0  | Low-quality | 20.25 |
| Sample_T2C_k141_72077_fragment_2   | 13401  | 12  | 4  | 1  | Low-quality | 20.25 |
| Sample_T15C_k141_141271            | 141324 | 149 | 4  | 81 | Low-quality | 20.23 |
| Sample_T10C_k141_34118             | 9341   | 13  | 4  | 1  | Low-quality | 20.23 |
| Sample_T8C_k141_53262              | 10201  | 11  | 3  | 0  | Low-quality | 20.23 |
| Sample_C5A_k141_225767             | 11273  | 8   | 0  | 1  | Low-quality | 20.22 |
| Sample_T10C_k141_49172             | 12223  | 26  | 7  | 0  | Low-quality | 20.21 |
| Sample_T15A_k141_15325             | 12517  | 15  | 3  | 1  | Low-quality | 20.21 |
| Sample_C2B_k141_330727             | 20024  | 20  | 3  | 3  | Low-quality | 20.2  |
| Sample_C11A_k141_179853_fragment_1 | 8677   | 16  | 2  | 0  | Low-quality | 20.2  |
| Sample_C11B_k141_203184            | 8150   | 7   | 0  | 0  | Low-quality | 20.2  |
| Sample_C11C_k141_104476            | 9450   | 9   | 3  | 1  | Low-quality | 20.2  |
| Sample_T10B_k141_160964            | 7561   | 13  | 2  | 1  | Low-quality | 20.2  |
| Sample_C3A_k141_214548             | 31932  | 34  | 2  | 8  | Low-quality | 20.19 |
| Sample_T17A_k141_24688             | 14849  | 17  | 0  | 4  | Low-quality | 20.18 |
| Sample_T13B_k141_58812             | 9110   | 10  | 8  | 0  | Low-quality | 20.18 |
| Sample_C6B_k141_48031              | 36533  | 41  | 1  | 21 | Low-quality | 20.16 |

|                                    |       |    |    |   |             |       |
|------------------------------------|-------|----|----|---|-------------|-------|
| Sample_T12B_k141_88806             | 9303  | 13 | 12 | 0 | Low-quality | 20.16 |
| Sample_C14C_k141_88240             | 8035  | 11 | 8  | 0 | Low-quality | 20.14 |
| Sample_C8C_k141_21926              | 9285  | 12 | 11 | 0 | Low-quality | 20.14 |
| Sample_T11A_k141_24455             | 11195 | 12 | 0  | 4 | Low-quality | 20.13 |
| Sample_T10A_k141_156827_fragment_1 | 10308 | 15 | 2  | 1 | Low-quality | 20.13 |
| Sample_T5C_k141_54838              | 11473 | 14 | 0  | 3 | Low-quality | 20.13 |
| Sample_C13A_k141_80338             | 8078  | 10 | 5  | 0 | Low-quality | 20.12 |
| Sample_C3C_k141_223006             | 7644  | 6  | 0  | 1 | Low-quality | 20.11 |
| Sample_C1B_k141_8307               | 9109  | 18 | 4  | 0 | Low-quality | 20.11 |
| Sample_C9A_k141_134640             | 7452  | 16 | 0  | 6 | Low-quality | 20.1  |
| Sample_T13C_k141_82185             | 11989 | 15 | 1  | 2 | Low-quality | 20.1  |
| Sample_T7A_k141_117044             | 18088 | 22 | 1  | 6 | Low-quality | 20.1  |
| Sample_T15A_k141_36145             | 33009 | 74 | 5  | 3 | Low-quality | 20.1  |
| Sample_T2B_k141_171393             | 7272  | 12 | 6  | 0 | Low-quality | 20.1  |
| Sample_C3A_k141_167122             | 13546 | 11 | 2  | 0 | Low-quality | 20.09 |
| Sample_T17B_k141_20925_fragment_1  | 8507  | 15 | 1  | 0 | Low-quality | 20.08 |
| Sample_T3B_k141_172242             | 9248  | 13 | 8  | 0 | Low-quality | 20.06 |
| Sample_C9C_k141_93250              | 15247 | 8  | 2  | 5 | Low-quality | 20.05 |
| Sample_C10A_k141_210180            | 7928  | 14 | 2  | 0 | Low-quality | 20.05 |
| Sample_C14A_k141_237127            | 14448 | 12 | 2  | 2 | Low-quality | 20.05 |
| Sample_T8C_k141_63329              | 8377  | 12 | 0  | 0 | Low-quality | 20.05 |
| Sample_C3B_k141_157503             | 12645 | 15 | 0  | 2 | Low-quality | 20.04 |
| Sample_C3C_k141_138869             | 6460  | 11 | 1  | 0 | Low-quality | 20.04 |
| Sample_C12C_k141_128686            | 6772  | 12 | 2  | 0 | Low-quality | 20.03 |
| Sample_C8B_k141_3001_fragment_1    | 15870 | 26 | 6  | 0 | Low-quality | 20.03 |
| Sample_T16C_k141_26196             | 12523 | 17 | 13 | 0 | Low-quality | 20.03 |
| Sample_T8C_k141_87087              | 8555  | 11 | 7  | 0 | Low-quality | 20.03 |
| Sample_C9A_k141_125566             | 7532  | 8  | 0  | 3 | Low-quality | 20.02 |
| Sample_C14B_k141_51326             | 8848  | 11 | 0  | 0 | Low-quality | 20.02 |
| Sample_C6C_k141_13746_fragment_2   | 19756 | 22 | 4  | 1 | Low-quality | 20.02 |
| Sample_T10A_k141_29508             | 9417  | 15 | 5  | 0 | Low-quality | 20.02 |
| Sample_T8C_k141_80095              | 8019  | 12 | 5  | 0 | Low-quality | 20.02 |
| Sample_T7A_k141_70871              | 21655 | 21 | 0  | 6 | Low-quality | 20.01 |
| Sample_C3A_k141_104738             | 9507  | 12 | 5  | 0 | Low-quality | 20.01 |
| Sample_T4C_k141_1753               | 12884 | 22 | 3  | 0 | Low-quality | 20.01 |
| Sample_C10A_k141_266384            | 17993 | 20 | 0  | 7 | Low-quality | 19.99 |
| Sample_T13B_k141_15285             | 9583  | 19 | 5  | 0 | Low-quality | 19.99 |
| Sample_T16B_k141_152492            | 29068 | 23 | 6  | 3 | Low-quality | 19.99 |
| Sample_C11B_k141_50636             | 8078  | 17 | 3  | 0 | Low-quality | 19.98 |

|                                    |       |    |    |    |             |       |
|------------------------------------|-------|----|----|----|-------------|-------|
| Sample_C5A_k141_115645             | 6846  | 9  | 1  | 0  | Low-quality | 19.98 |
| Sample_T14B_k141_199430            | 22480 | 20 | 1  | 2  | Low-quality | 19.98 |
| Sample_C3A_k141_172341             | 10946 | 10 | 5  | 3  | Low-quality | 19.97 |
| Sample_T4C_k141_43964              | 10674 | 15 | 11 | 1  | Low-quality | 19.97 |
| Sample_T17B_k141_32398             | 15381 | 27 | 3  | 1  | Low-quality | 19.97 |
| Sample_T16B_k141_17774             | 24399 | 18 | 0  | 9  | Low-quality | 19.96 |
| Sample_T7C_k141_64136              | 7616  | 7  | 0  | 2  | Low-quality | 19.96 |
| Sample_C2A_k141_84808              | 19801 | 17 | 0  | 4  | Low-quality | 19.95 |
| Sample_C2B_k141_308547             | 15641 | 19 | 1  | 4  | Low-quality | 19.95 |
| Sample_T2C_k141_247564             | 29672 | 34 | 1  | 4  | Low-quality | 19.95 |
| Sample_C8B_k141_36106              | 14837 | 22 | 1  | 8  | Low-quality | 19.94 |
| Sample_T17A_k141_48663_fragment_1  | 8144  | 11 | 4  | 1  | Low-quality | 19.94 |
| Sample_T5A_k141_23923              | 9653  | 12 | 8  | 0  | Low-quality | 19.93 |
| Sample_T13C_k141_17484             | 13151 | 14 | 1  | 4  | Low-quality | 19.9  |
| Sample_C4A_k141_238617             | 10661 | 14 | 4  | 0  | Low-quality | 19.9  |
| Sample_T13B_k141_136084            | 10294 | 11 | 7  | 0  | Low-quality | 19.9  |
| Sample_T15C_k141_73693             | 37371 | 50 | 4  | 0  | Low-quality | 19.9  |
| Sample_T2A_k141_128482             | 8074  | 20 | 1  | 0  | Low-quality | 19.9  |
| Sample_C2C_k141_25206              | 37158 | 40 | 1  | 18 | Low-quality | 19.89 |
| Sample_C4B_k141_104078             | 7035  | 18 | 3  | 0  | Low-quality | 19.89 |
| Sample_C3B_k141_257562             | 16472 | 20 | 2  | 2  | Low-quality | 19.88 |
| Sample_C8C_k141_37541              | 8048  | 9  | 0  | 2  | Low-quality | 19.88 |
| Sample_T17B_k141_37909             | 13056 | 13 | 2  | 2  | Low-quality | 19.88 |
| Sample_C1C_k141_181578             | 7520  | 18 | 3  | 0  | Low-quality | 19.87 |
| Sample_T18B_k141_36417             | 7775  | 13 | 4  | 0  | Low-quality | 19.86 |
| Sample_C11A_k141_65555             | 6440  | 11 | 1  | 0  | Low-quality | 19.85 |
| Sample_C11B_k141_162811            | 8341  | 8  | 0  | 4  | Low-quality | 19.85 |
| Sample_C11C_k141_98447             | 8379  | 11 | 0  | 1  | Low-quality | 19.85 |
| Sample_T7A_k141_6202               | 7174  | 12 | 5  | 0  | Low-quality | 19.85 |
| Sample_T13C_k141_67309             | 5692  | 9  | 2  | 0  | Low-quality | 19.84 |
| Sample_C3B_k141_64655_fragment_1   | 26040 | 49 | 5  | 3  | Low-quality | 19.84 |
| Sample_T14B_k141_196658_fragment_1 | 17314 | 20 | 5  | 5  | Low-quality | 19.84 |
| Sample_C1B_k141_211339             | 15411 | 16 | 0  | 5  | Low-quality | 19.83 |
| Sample_T5A_k141_37214              | 29476 | 31 | 1  | 11 | Low-quality | 19.83 |
| Sample_T16C_k141_20773             | 19655 | 12 | 0  | 5  | Low-quality | 19.82 |
| Sample_T10A_k141_67233             | 7415  | 10 | 4  | 0  | Low-quality | 19.82 |
| Sample_T2A_k141_234872             | 7064  | 11 | 7  | 0  | Low-quality | 19.82 |
| Sample_C10C_k141_133422            | 6941  | 12 | 3  | 1  | Low-quality | 19.8  |
| Sample_T8B_k141_252539             | 6544  | 14 | 1  | 0  | Low-quality | 19.8  |

|                                    |       |    |   |    |             |       |
|------------------------------------|-------|----|---|----|-------------|-------|
| Sample_T17A_k141_7400              | 11341 | 14 | 0 | 1  | Low-quality | 19.78 |
| Sample_T15C_k141_67647             | 6420  | 16 | 2 | 0  | Low-quality | 19.78 |
| Sample_T5A_k141_46760              | 9238  | 10 | 0 | 1  | Low-quality | 19.78 |
| Sample_C11B_k141_137367            | 55513 | 57 | 1 | 34 | Low-quality | 19.77 |
| Sample_C10C_k141_19195             | 17124 | 13 | 1 | 6  | Low-quality | 19.76 |
| Sample_C9B_k141_99190              | 7893  | 7  | 0 | 1  | Low-quality | 19.76 |
| Sample_T12A_k141_106505            | 7830  | 10 | 0 | 0  | Low-quality | 19.76 |
| Sample_T17B_k141_3736              | 13055 | 14 | 1 | 1  | Low-quality | 19.75 |
| Sample_T4B_k141_153800             | 67048 | 68 | 1 | 38 | Low-quality | 19.75 |
| Sample_T5C_k141_170031             | 20636 | 46 | 2 | 0  | Low-quality | 19.75 |
| Sample_T14C_k141_71132             | 8298  | 8  | 0 | 7  | Low-quality | 19.74 |
| Sample_T6B_k141_192933             | 21380 | 19 | 0 | 4  | Low-quality | 19.74 |
| Sample_T5A_k141_48163              | 7627  | 8  | 0 | 4  | Low-quality | 19.72 |
| Sample_T14A_k141_204000_fragment_1 | 9169  | 9  | 0 | 1  | Low-quality | 19.72 |
| Sample_C13B_k141_19883             | 10109 | 8  | 0 | 1  | Low-quality | 19.71 |
| Sample_C1B_k141_228182             | 7226  | 10 | 5 | 0  | Low-quality | 19.71 |
| Sample_T14B_k141_148535            | 12357 | 10 | 0 | 0  | Low-quality | 19.71 |
| Sample_C12C_k141_12994             | 6348  | 13 | 1 | 2  | Low-quality | 19.7  |
| Sample_C2B_k141_75774              | 13019 | 17 | 1 | 2  | Low-quality | 19.7  |
| Sample_C5B_k141_9823               | 9563  | 14 | 6 | 0  | Low-quality | 19.7  |
| Sample_T5C_k141_49114              | 6683  | 7  | 3 | 0  | Low-quality | 19.7  |
| Sample_T15A_k141_37753             | 8357  | 6  | 0 | 2  | Low-quality | 19.69 |
| Sample_C4B_k141_127806             | 45074 | 42 | 1 | 26 | Low-quality | 19.68 |
| Sample_T12A_k141_81411             | 7684  | 8  | 0 | 3  | Low-quality | 19.68 |
| Sample_T7A_k141_92061              | 25953 | 24 | 1 | 3  | Low-quality | 19.68 |
| Sample_C7B_k141_16126              | 11876 | 18 | 7 | 0  | Low-quality | 19.68 |
| Sample_T13B_k141_56067             | 8771  | 10 | 0 | 0  | Low-quality | 19.68 |
| Sample_C4C_k141_1136               | 48439 | 37 | 1 | 6  | Low-quality | 19.67 |
| Sample_T18C_k141_26668             | 13214 | 17 | 1 | 5  | Low-quality | 19.67 |
| Sample_C6B_k141_168469             | 7273  | 15 | 2 | 0  | Low-quality | 19.67 |
| Sample_T3A_k141_24633              | 11772 | 13 | 0 | 4  | Low-quality | 19.66 |
| Sample_C2C_k141_264562_fragment_2  | 19891 | 21 | 1 | 4  | Low-quality | 19.66 |
| Sample_T13B_k141_90231             | 7232  | 10 | 6 | 0  | Low-quality | 19.66 |
| Sample_T6B_k141_47200              | 7697  | 12 | 0 | 9  | Low-quality | 19.65 |
| Sample_C10B_k141_73562             | 7202  | 14 | 6 | 0  | Low-quality | 19.65 |
| Sample_T12B_k141_172074            | 7684  | 12 | 3 | 0  | Low-quality | 19.65 |
| Sample_T14A_k141_178726_fragment_2 | 9842  | 24 | 4 | 0  | Low-quality | 19.65 |
| Sample_T8B_k141_39071              | 12575 | 15 | 1 | 11 | Low-quality | 19.64 |
| Sample_C14C_k141_85125             | 8210  | 6  | 0 | 2  | Low-quality | 19.63 |



|                                    |       |    |   |    |             |       |
|------------------------------------|-------|----|---|----|-------------|-------|
| Sample_C3C_k141_250479             | 7443  | 12 | 1 | 2  | Low-quality | 19.63 |
| Sample_T12A_k141_329799            | 13113 | 16 | 1 | 4  | Low-quality | 19.62 |
| Sample_C12A_k141_122214_fragment_1 | 9942  | 16 | 4 | 0  | Low-quality | 19.62 |
| Sample_C3A_k141_108706             | 9183  | 14 | 3 | 0  | Low-quality | 19.62 |
| Sample_T7A_k141_128813             | 7770  | 12 | 7 | 0  | Low-quality | 19.62 |
| Sample_T15B_k141_4363              | 36163 | 26 | 1 | 8  | Low-quality | 19.61 |
| Sample_C12C_k141_17909             | 7445  | 17 | 6 | 0  | Low-quality | 19.61 |
| Sample_C2B_k141_325109             | 8342  | 17 | 5 | 0  | Low-quality | 19.61 |
| Sample_T12C_k141_102595            | 9490  | 11 | 3 | 1  | Low-quality | 19.61 |
| Sample_T10B_k141_70424             | 14973 | 13 | 2 | 2  | Low-quality | 19.6  |
| Sample_C12A_k141_133359            | 7128  | 8  | 4 | 1  | Low-quality | 19.59 |
| Sample_C8B_k141_178195             | 7439  | 11 | 4 | 0  | Low-quality | 19.59 |
| Sample_T8B_k141_26010              | 8544  | 14 | 4 | 0  | Low-quality | 19.59 |
| Sample_C14A_k141_30974             | 7717  | 11 | 7 | 0  | Low-quality | 19.58 |
| Sample_T11B_k141_76156             | 6731  | 10 | 8 | 0  | Low-quality | 19.58 |
| Sample_C4B_k141_142113             | 54753 | 44 | 1 | 27 | Low-quality | 19.57 |
| Sample_C6B_k141_202804             | 17504 | 27 | 0 | 4  | Low-quality | 19.57 |
| Sample_C13C_k141_17629             | 9321  | 18 | 5 | 0  | Low-quality | 19.57 |
| Sample_C2A_k141_134128             | 8731  | 11 | 7 | 0  | Low-quality | 19.56 |
| Sample_T6C_k141_95419              | 8298  | 20 | 4 | 0  | Low-quality | 19.56 |
| Sample_C11A_k141_54009             | 8476  | 7  | 0 | 1  | Low-quality | 19.55 |
| Sample_C2C_k141_147326             | 7540  | 9  | 0 | 1  | Low-quality | 19.54 |
| Sample_T8C_k141_59181              | 8772  | 12 | 0 | 2  | Low-quality | 19.54 |
| Sample_C7B_k141_159556             | 11712 | 18 | 3 | 2  | Low-quality | 19.53 |
| Sample_T17B_k141_7152              | 9499  | 19 | 2 | 0  | Low-quality | 19.53 |
| Sample_C4A_k141_10124              | 29039 | 28 | 1 | 6  | Low-quality | 19.52 |
| Sample_T14B_k141_77377             | 16073 | 13 | 0 | 1  | Low-quality | 19.52 |
| Sample_C1B_k141_12159              | 7413  | 16 | 3 | 0  | Low-quality | 19.52 |
| Sample_C3A_k141_137688             | 9240  | 11 | 3 | 0  | Low-quality | 19.52 |
| Sample_T8A_k141_117312             | 8726  | 16 | 7 | 1  | Low-quality | 19.52 |
| Sample_T11B_k141_37295             | 18417 | 13 | 1 | 4  | Low-quality | 19.51 |
| Sample_T4C_k141_60597              | 9075  | 16 | 4 | 1  | Low-quality | 19.51 |
| Sample_T17A_k141_37079             | 10858 | 8  | 0 | 7  | Low-quality | 19.5  |
| Sample_C2A_k141_53959              | 9030  | 7  | 3 | 0  | Low-quality | 19.5  |
| Sample_T4B_k141_53445              | 15471 | 12 | 0 | 3  | Low-quality | 19.49 |
| Sample_C1C_k141_124082             | 11413 | 14 | 1 | 1  | Low-quality | 19.49 |
| Sample_T8C_k141_105831             | 8434  | 16 | 1 | 0  | Low-quality | 19.49 |
| Sample_C2B_k141_234254             | 8188  | 9  | 0 | 2  | Low-quality | 19.48 |
| Sample_T11A_k141_7548              | 12873 | 16 | 1 | 4  | Low-quality | 19.48 |

|                                  |       |    |    |    |             |       |
|----------------------------------|-------|----|----|----|-------------|-------|
| Sample_T7C_k141_56615            | 8307  | 11 | 1  | 0  | Low-quality | 19.48 |
| Sample_C13A_k141_79189           | 8272  | 11 | 3  | 0  | Low-quality | 19.48 |
| Sample_T7A_k141_4932             | 7970  | 17 | 4  | 0  | Low-quality | 19.48 |
| Sample_T5A_k141_20565            | 31376 | 26 | 2  | 2  | Low-quality | 19.47 |
| Sample_T5B_k141_32593            | 17477 | 14 | 0  | 8  | Low-quality | 19.46 |
| Sample_T1C_k141_27168            | 6754  | 9  | 1  | 0  | Low-quality | 19.46 |
| Sample_C1A_k141_28251            | 7485  | 14 | 2  | 1  | Low-quality | 19.45 |
| Sample_C3A_k141_37159            | 10147 | 7  | 3  | 1  | Low-quality | 19.45 |
| Sample_T13B_k141_42103           | 11613 | 18 | 0  | 1  | Low-quality | 19.45 |
| Sample_T4B_k141_92148            | 8005  | 13 | 7  | 0  | Low-quality | 19.44 |
| Sample_T15A_k141_36291           | 31870 | 66 | 6  | 1  | Low-quality | 19.42 |
| Sample_C10A_k141_89113           | 8583  | 16 | 6  | 0  | Low-quality | 19.41 |
| Sample_T17B_k141_28004           | 8416  | 12 | 2  | 0  | Low-quality | 19.41 |
| Sample_T7A_k141_99761_fragment_1 | 11871 | 13 | 0  | 2  | Low-quality | 19.41 |
| Sample_C5C_k141_108328           | 10577 | 10 | 4  | 1  | Low-quality | 19.4  |
| Sample_C8B_k141_27979_fragment_2 | 10765 | 18 | 13 | 1  | Low-quality | 19.4  |
| Sample_T5A_k141_22857            | 16218 | 40 | 4  | 0  | Low-quality | 19.4  |
| Sample_C12A_k141_18832           | 9128  | 11 | 5  | 0  | Low-quality | 19.39 |
| Sample_C3A_k141_169833           | 10323 | 8  | 4  | 0  | Low-quality | 19.39 |
| Sample_C10C_k141_60006           | 7762  | 14 | 3  | 0  | Low-quality | 19.38 |
| Sample_C1C_k141_24756            | 8064  | 17 | 1  | 0  | Low-quality | 19.38 |
| Sample_T6C_k141_35029            | 6943  | 10 | 4  | 0  | Low-quality | 19.38 |
| Sample_T2C_k141_252735           | 9771  | 13 | 0  | 0  | Low-quality | 19.36 |
| Sample_T12A_k141_33245           | 19187 | 10 | 0  | 10 | Low-quality | 19.35 |
| Sample_T13B_k141_56318           | 7629  | 7  | 0  | 0  | Low-quality | 19.35 |
| Sample_T13B_k141_107721          | 11330 | 18 | 3  | 3  | Low-quality | 19.35 |
| Sample_T2B_k141_180985           | 7165  | 12 | 1  | 1  | Low-quality | 19.35 |
| Sample_C3A_k141_171753           | 7996  | 22 | 2  | 0  | Low-quality | 19.35 |
| Sample_T8B_k141_212608           | 9343  | 16 | 3  | 1  | Low-quality | 19.35 |
| Sample_C12B_k141_145235          | 44437 | 54 | 1  | 27 | Low-quality | 19.34 |
| Sample_C14C_k141_18922           | 20585 | 36 | 3  | 1  | Low-quality | 19.34 |
| Sample_T6B_k141_147094           | 11601 | 12 | 0  | 5  | Low-quality | 19.34 |
| Sample_T17A_k141_3546            | 8344  | 14 | 1  | 0  | Low-quality | 19.34 |
| Sample_C14A_k141_118593          | 16698 | 14 | 0  | 3  | Low-quality | 19.33 |
| Sample_T5B_k141_62039            | 7946  | 13 | 4  | 0  | Low-quality | 19.33 |
| Sample_T10A_k141_61178           | 9159  | 13 | 1  | 0  | Low-quality | 19.32 |
| Sample_T11A_k141_20994           | 52295 | 52 | 2  | 30 | Low-quality | 19.32 |
| Sample_C5A_k141_177219           | 12736 | 16 | 0  | 4  | Low-quality | 19.31 |
| Sample_T2C_k141_85150            | 14778 | 6  | 0  | 2  | Low-quality | 19.31 |

|                                    |        |     |   |     |             |       |
|------------------------------------|--------|-----|---|-----|-------------|-------|
| Sample_T8B_k141_131781             | 18750  | 17  | 0 | 3   | Low-quality | 19.31 |
| Sample_T10A_k141_27180             | 16382  | 15  | 1 | 2   | Low-quality | 19.3  |
| Sample_C14C_k141_35580_fragment_1  | 7832   | 11  | 5 | 0   | Low-quality | 19.3  |
| Sample_C3A_k141_209607_fragment_2  | 9413   | 12  | 1 | 4   | Low-quality | 19.3  |
| Sample_C7A_k141_178473             | 25227  | 32  | 2 | 0   | Low-quality | 19.29 |
| Sample_C8A_k141_150320             | 9628   | 11  | 1 | 5   | Low-quality | 19.29 |
| Sample_C8B_k141_129090             | 10783  | 15  | 3 | 0   | Low-quality | 19.28 |
| Sample_T13B_k141_135486_fragment_1 | 8723   | 14  | 4 | 0   | Low-quality | 19.28 |
| Sample_T6A_k141_10169              | 10046  | 13  | 1 | 0   | Low-quality | 19.27 |
| Sample_T2B_k141_260390             | 11638  | 22  | 9 | 0   | Low-quality | 19.27 |
| Sample_C13C_k141_45622             | 9834   | 16  | 6 | 2   | Low-quality | 19.26 |
| Sample_T16C_k141_32106             | 7942   | 5   | 0 | 1   | Low-quality | 19.26 |
| Sample_T6A_k141_93164              | 8094   | 9   | 0 | 6   | Low-quality | 19.26 |
| Sample_T6C_k141_192040             | 7530   | 12  | 2 | 0   | Low-quality | 19.26 |
| Sample_C8C_k141_78035              | 8402   | 9   | 2 | 1   | Low-quality | 19.25 |
| Sample_C12A_k141_164338            | 8294   | 11  | 0 | 3   | Low-quality | 19.24 |
| Sample_C8C_k141_97051              | 8629   | 8   | 0 | 3   | Low-quality | 19.24 |
| Sample_T2A_k141_104975             | 20885  | 21  | 3 | 7   | Low-quality | 19.24 |
| Sample_C10C_k141_9187              | 47382  | 44  | 1 | 2   | Low-quality | 19.24 |
| Sample_C14A_k141_31657             | 10413  | 12  | 7 | 0   | Low-quality | 19.23 |
| Sample_C8A_k141_81444              | 13000  | 19  | 2 | 1   | Low-quality | 19.23 |
| Sample_T10A_k141_40396_fragment_1  | 34758  | 47  | 1 | 5   | Low-quality | 19.23 |
| Sample_C11C_k141_180006            | 8839   | 11  | 9 | 1   | Low-quality | 19.22 |
| Sample_C3A_k141_221864_fragment_1  | 8793   | 10  | 4 | 0   | Low-quality | 19.22 |
| Sample_T8A_k141_63361_fragment_2   | 8043   | 11  | 1 | 0   | Low-quality | 19.22 |
| Sample_C9A_k141_1778               | 238785 | 223 | 1 | 176 | Low-quality | 19.21 |
| Sample_T3A_k141_118227             | 10098  | 11  | 3 | 0   | Low-quality | 19.21 |
| Sample_T8C_k141_50215_fragment_1   | 8171   | 10  | 1 | 0   | Low-quality | 19.21 |
| Sample_C5C_k141_107691             | 8953   | 3   | 1 | 0   | Low-quality | 19.2  |
| Sample_C6C_k141_139219             | 8917   | 8   | 0 | 4   | Low-quality | 19.2  |
| Sample_C14A_k141_1633_fragment_1   | 11369  | 9   | 3 | 0   | Low-quality | 19.2  |
| Sample_C2C_k141_313384             | 15684  | 18  | 0 | 10  | Low-quality | 19.19 |
| Sample_T16B_k141_58358             | 8113   | 15  | 1 | 1   | Low-quality | 19.19 |
| Sample_T16B_k141_173424            | 6353   | 8   | 0 | 0   | Low-quality | 19.19 |
| Sample_T18C_k141_148545            | 11227  | 19  | 4 | 1   | Low-quality | 19.19 |
| Sample_T6C_k141_169910             | 7780   | 11  | 0 | 1   | Low-quality | 19.19 |
| Sample_C13B_k141_40084             | 9098   | 12  | 9 | 1   | Low-quality | 19.19 |
| Sample_T5A_k141_14192              | 7095   | 7   | 6 | 0   | Low-quality | 19.19 |
| Sample_C12C_k141_201182            | 8630   | 12  | 1 | 0   | Low-quality | 19.18 |

|                                  |        |     |    |    |             |       |
|----------------------------------|--------|-----|----|----|-------------|-------|
| Sample_C14C_k141_8839            | 10278  | 10  | 1  | 2  | Low-quality | 19.18 |
| Sample_T11A_k141_128940          | 19893  | 20  | 0  | 16 | Low-quality | 19.18 |
| Sample_T11C_k141_128808          | 14657  | 9   | 0  | 2  | Low-quality | 19.18 |
| Sample_C1B_k141_182795           | 10555  | 6   | 0  | 0  | Low-quality | 19.18 |
| Sample_C9A_k141_116986           | 20714  | 20  | 1  | 3  | Low-quality | 19.17 |
| Sample_C3B_k141_249960           | 11051  | 25  | 1  | 0  | Low-quality | 19.17 |
| Sample_C5A_k141_257842           | 8967   | 10  | 0  | 0  | Low-quality | 19.17 |
| Sample_C11A_k141_11314           | 10061  | 14  | 0  | 3  | Low-quality | 19.16 |
| Sample_T3A_k141_132495           | 18172  | 16  | 1  | 4  | Low-quality | 19.16 |
| Sample_T13A_k141_14966           | 12284  | 16  | 5  | 1  | Low-quality | 19.16 |
| Sample_C12C_k141_171035          | 14001  | 21  | 1  | 4  | Low-quality | 19.15 |
| Sample_T14A_k141_134536          | 17231  | 13  | 0  | 6  | Low-quality | 19.15 |
| Sample_T16B_k141_11210           | 9645   | 8   | 0  | 1  | Low-quality | 19.15 |
| Sample_T2C_k141_158153           | 58153  | 55  | 0  | 37 | Low-quality | 19.15 |
| Sample_C11B_k141_118565          | 7802   | 8   | 5  | 0  | Low-quality | 19.15 |
| Sample_C3A_k141_145755           | 8584   | 10  | 1  | 0  | Low-quality | 19.15 |
| Sample_C13B_k141_36639           | 7440   | 13  | 3  | 0  | Low-quality | 19.14 |
| Sample_C1A_k141_55164            | 20097  | 29  | 7  | 0  | Low-quality | 19.14 |
| Sample_C2B_k141_182710           | 8086   | 14  | 5  | 1  | Low-quality | 19.14 |
| Sample_C4B_k141_258419           | 7812   | 7   | 6  | 0  | Low-quality | 19.14 |
| Sample_C8C_k141_97639            | 10637  | 15  | 3  | 1  | Low-quality | 19.14 |
| Sample_T12A_k141_315714          | 7528   | 11  | 4  | 0  | Low-quality | 19.14 |
| Sample_T6B_k141_170694           | 5518   | 6   | 0  | 0  | Low-quality | 19.13 |
| Sample_C4B_k141_144478           | 10492  | 13  | 5  | 0  | Low-quality | 19.13 |
| Sample_C11B_k141_50332           | 7649   | 8   | 0  | 1  | Low-quality | 19.12 |
| Sample_C2B_k141_95557            | 8007   | 19  | 5  | 0  | Low-quality | 19.12 |
| Sample_T12A_k141_246508          | 11920  | 16  | 2  | 1  | Low-quality | 19.12 |
| Sample_T6C_k141_141250           | 11232  | 11  | 3  | 0  | Low-quality | 19.12 |
| Sample_T8C_k141_136629           | 8769   | 14  | 5  | 3  | Low-quality | 19.12 |
| Sample_C9B_k141_97010            | 15618  | 19  | 0  | 10 | Low-quality | 19.11 |
| Sample_T3B_k141_136626           | 121004 | 123 | 6  | 26 | Low-quality | 19.11 |
| Sample_C12C_k141_224123          | 7435   | 12  | 6  | 0  | Low-quality | 19.11 |
| Sample_C2B_k141_160966           | 7687   | 13  | 5  | 0  | Low-quality | 19.11 |
| Sample_C3A_k141_97061_fragment_1 | 13546  | 20  | 11 | 0  | Low-quality | 19.11 |
| Sample_C6C_k141_125937           | 9818   | 21  | 5  | 1  | Low-quality | 19.11 |
| Sample_T5B_k141_66394            | 17189  | 14  | 0  | 1  | Low-quality | 19.1  |
| Sample_T8C_k141_207075           | 11056  | 22  | 4  | 0  | Low-quality | 19.1  |
| Sample_C2A_k141_76636            | 29492  | 28  | 1  | 12 | Low-quality | 19.09 |
| Sample_C3A_k141_156306           | 31430  | 58  | 5  | 5  | Low-quality | 19.09 |

|                                   |       |    |    |    |             |       |
|-----------------------------------|-------|----|----|----|-------------|-------|
| Sample_C7B_k141_138857            | 9455  | 19 | 1  | 0  | Low-quality | 19.08 |
| Sample_T10C_k141_67805            | 7142  | 15 | 0  | 1  | Low-quality | 19.08 |
| Sample_C4B_k141_71694             | 6976  | 7  | 6  | 0  | Low-quality | 19.08 |
| Sample_C11B_k141_236001           | 10633 | 7  | 0  | 2  | Low-quality | 19.07 |
| Sample_C3B_k141_259175            | 25985 | 51 | 3  | 11 | Low-quality | 19.06 |
| Sample_T3A_k141_39100             | 6339  | 7  | 0  | 5  | Low-quality | 19.06 |
| Sample_C14B_k141_87795_fragment_1 | 31850 | 46 | 7  | 1  | Low-quality | 19.06 |
| Sample_C5B_k141_14121             | 8457  | 17 | 5  | 0  | Low-quality | 19.06 |
| Sample_T12B_k141_71232            | 6673  | 12 | 7  | 0  | Low-quality | 19.06 |
| Sample_T13B_k141_12821            | 8656  | 8  | 6  | 0  | Low-quality | 19.06 |
| Sample_T18C_k141_97519            | 5370  | 5  | 0  | 0  | Low-quality | 19.05 |
| Sample_C1B_k141_114689            | 5466  | 7  | 3  | 0  | Low-quality | 19.05 |
| Sample_C3B_k141_18455             | 7932  | 9  | 0  | 1  | Low-quality | 19.04 |
| Sample_C8C_k141_111925            | 13259 | 11 | 1  | 5  | Low-quality | 19.04 |
| Sample_T3B_k141_10867             | 28317 | 32 | 1  | 7  | Low-quality | 19.04 |
| Sample_C10A_k141_91882_fragment_2 | 8204  | 8  | 0  | 1  | Low-quality | 19.04 |
| Sample_C6A_k141_59733             | 8408  | 16 | 2  | 0  | Low-quality | 19.04 |
| Sample_T2B_k141_266708            | 6917  | 16 | 1  | 0  | Low-quality | 19.04 |
| Sample_T2B_k141_101430            | 47214 | 30 | 1  | 22 | Low-quality | 19.03 |
| Sample_C11C_k141_126153           | 33690 | 37 | 11 | 2  | Low-quality | 19.02 |
| Sample_C13B_k141_108941           | 11462 | 14 | 2  | 0  | Low-quality | 19.02 |
| Sample_T11B_k141_69143            | 21208 | 46 | 4  | 0  | Low-quality | 19.02 |
| Sample_C5A_k141_220128            | 23444 | 16 | 1  | 5  | Low-quality | 19.01 |
| Sample_C2B_k141_312996            | 8284  | 10 | 7  | 0  | Low-quality | 19.01 |
| Sample_C2B_k141_315134            | 15319 | 38 | 6  | 0  | Low-quality | 19.01 |
| Sample_T12A_k141_182006           | 25324 | 19 | 3  | 2  | Low-quality | 19.01 |
| Sample_T15C_k141_39099            | 8496  | 16 | 5  | 0  | Low-quality | 19.01 |
| Sample_T17B_k141_19879            | 7764  | 9  | 7  | 0  | Low-quality | 19.01 |
| Sample_T2C_k141_61750             | 8874  | 11 | 7  | 0  | Low-quality | 19.01 |
| Sample_C4C_k141_65571             | 9422  | 16 | 7  | 0  | Low-quality | 19    |
| Sample_C2A_k141_94593             | 16128 | 26 | 4  | 0  | Low-quality | 18.99 |
| Sample_C13B_k141_6301             | 18640 | 12 | 0  | 4  | Low-quality | 18.97 |
| Sample_C8B_k141_125661            | 6807  | 10 | 4  | 0  | Low-quality | 18.97 |
| Sample_T17A_k141_24198            | 7722  | 10 | 5  | 0  | Low-quality | 18.96 |
| Sample_C9A_k141_28064             | 11242 | 16 | 0  | 1  | Low-quality | 18.95 |
| Sample_T18B_k141_93460            | 34941 | 38 | 1  | 15 | Low-quality | 18.95 |
| Sample_T4C_k141_88770             | 12524 | 12 | 1  | 2  | Low-quality | 18.95 |
| Sample_T17B_k141_19719            | 5846  | 10 | 6  | 0  | Low-quality | 18.95 |
| Sample_T6A_k141_5471              | 11339 | 13 | 1  | 0  | Low-quality | 18.94 |

|                                    |       |    |   |   |             |       |
|------------------------------------|-------|----|---|---|-------------|-------|
| Sample_C13C_k141_51280             | 6593  | 10 | 7 | 0 | Low-quality | 18.94 |
| Sample_C9A_k141_31387              | 6832  | 13 | 5 | 0 | Low-quality | 18.94 |
| Sample_T6C_k141_109653             | 8883  | 14 | 1 | 0 | Low-quality | 18.94 |
| Sample_T13B_k141_36009             | 8122  | 17 | 4 | 0 | Low-quality | 18.93 |
| Sample_T16B_k141_129946            | 8986  | 7  | 3 | 0 | Low-quality | 18.92 |
| Sample_C13B_k141_5306              | 30497 | 32 | 2 | 7 | Low-quality | 18.91 |
| Sample_C2A_k141_80554              | 7719  | 9  | 0 | 2 | Low-quality | 18.91 |
| Sample_T7A_k141_51018              | 8246  | 12 | 0 | 0 | Low-quality | 18.91 |
| Sample_C12C_k141_125514            | 8505  | 15 | 0 | 0 | Low-quality | 18.91 |
| Sample_T13C_k141_90868             | 11184 | 12 | 3 | 0 | Low-quality | 18.91 |
| Sample_T3B_k141_128713             | 9277  | 9  | 6 | 1 | Low-quality | 18.91 |
| Sample_T8A_k141_73308_fragment_1   | 6825  | 11 | 2 | 1 | Low-quality | 18.91 |
| Sample_C13B_k141_17991             | 7945  | 9  | 0 | 5 | Low-quality | 18.9  |
| Sample_C3A_k141_157412_fragment_1  | 6847  | 15 | 5 | 0 | Low-quality | 18.9  |
| Sample_T15B_k141_79817             | 5424  | 5  | 3 | 0 | Low-quality | 18.9  |
| Sample_T3C_k141_91927              | 8083  | 10 | 1 | 0 | Low-quality | 18.9  |
| Sample_C8C_k141_108395             | 12481 | 15 | 1 | 3 | Low-quality | 18.89 |
| Sample_C4B_k141_164468             | 7411  | 10 | 6 | 0 | Low-quality | 18.89 |
| Sample_T10A_k141_25587             | 6635  | 12 | 7 | 0 | Low-quality | 18.89 |
| Sample_T13B_k141_114272_fragment_2 | 14704 | 15 | 1 | 0 | Low-quality | 18.89 |
| Sample_C13A_k141_24038             | 9290  | 9  | 6 | 0 | Low-quality | 18.88 |
| Sample_C10A_k141_33576             | 16587 | 15 | 0 | 9 | Low-quality | 18.86 |
| Sample_T2A_k141_143549             | 14316 | 10 | 0 | 2 | Low-quality | 18.86 |
| Sample_T5C_k141_169593             | 18219 | 19 | 2 | 0 | Low-quality | 18.86 |
| Sample_C10A_k141_132779            | 6921  | 11 | 2 | 0 | Low-quality | 18.86 |
| Sample_C12A_k141_73485_fragment_1  | 14956 | 17 | 2 | 1 | Low-quality | 18.86 |
| Sample_C9C_k141_1201               | 7014  | 7  | 0 | 0 | Low-quality | 18.86 |
| Sample_C9C_k141_76619_fragment_1   | 7334  | 14 | 5 | 0 | Low-quality | 18.85 |
| Sample_C12C_k141_149298            | 7415  | 9  | 1 | 0 | Low-quality | 18.84 |
| Sample_T10B_k141_178894            | 9548  | 10 | 1 | 4 | Low-quality | 18.84 |
| Sample_T17A_k141_49936             | 6816  | 10 | 6 | 0 | Low-quality | 18.84 |
| Sample_T17A_k141_20482             | 7515  | 5  | 0 | 0 | Low-quality | 18.83 |
| Sample_C2B_k141_282388             | 13794 | 15 | 4 | 1 | Low-quality | 18.83 |
| Sample_C2B_k141_53541              | 12909 | 14 | 0 | 1 | Low-quality | 18.82 |
| Sample_C4C_k141_230973             | 16737 | 8  | 1 | 4 | Low-quality | 18.82 |
| Sample_T8A_k141_30298              | 7004  | 12 | 1 | 0 | Low-quality | 18.82 |
| Sample_T10B_k141_104009            | 30070 | 36 | 1 | 2 | Low-quality | 18.81 |
| Sample_C11C_k141_62486             | 18141 | 21 | 5 | 2 | Low-quality | 18.8  |
| Sample_C8C_k141_38951              | 7502  | 17 | 0 | 6 | Low-quality | 18.8  |

|                                   |        |     |   |    |             |       |
|-----------------------------------|--------|-----|---|----|-------------|-------|
| Sample_T16B_k141_17800            | 8821   | 20  | 7 | 1  | Low-quality | 18.8  |
| Sample_C7C_k141_41710             | 12743  | 18  | 1 | 5  | Low-quality | 18.79 |
| Sample_C8C_k141_106146            | 29304  | 37  | 2 | 2  | Low-quality | 18.79 |
| Sample_T4B_k141_93565             | 119780 | 112 | 6 | 62 | Low-quality | 18.79 |
| Sample_T8C_k141_3254              | 5689   | 7   | 4 | 0  | Low-quality | 18.79 |
| Sample_T16B_k141_85256            | 32696  | 54  | 5 | 0  | Low-quality | 18.78 |
| Sample_T13B_k141_115716           | 6995   | 9   | 1 | 0  | Low-quality | 18.77 |
| Sample_T7C_k141_46193             | 45795  | 34  | 5 | 1  | Low-quality | 18.77 |
| Sample_C10C_k141_69497            | 17208  | 16  | 0 | 13 | Low-quality | 18.76 |
| Sample_C13B_k141_69561            | 9053   | 11  | 5 | 0  | Low-quality | 18.75 |
| Sample_T8A_k141_30898             | 31330  | 27  | 1 | 7  | Low-quality | 18.74 |
| Sample_C3A_k141_2271              | 11174  | 11  | 3 | 0  | Low-quality | 18.73 |
| Sample_T12A_k141_95268            | 8435   | 17  | 4 | 1  | Low-quality | 18.73 |
| Sample_C4C_k141_177441            | 7642   | 13  | 3 | 1  | Low-quality | 18.72 |
| Sample_C8B_k141_197663            | 8193   | 9   | 0 | 0  | Low-quality | 18.72 |
| Sample_T11A_k141_109933           | 7572   | 16  | 7 | 0  | Low-quality | 18.72 |
| Sample_C4B_k141_213615            | 7559   | 10  | 0 | 0  | Low-quality | 18.71 |
| Sample_C10C_k141_144457           | 7440   | 15  | 5 | 0  | Low-quality | 18.71 |
| Sample_C2A_k141_177405            | 7889   | 12  | 3 | 0  | Low-quality | 18.7  |
| Sample_T8C_k141_139704            | 12230  | 20  | 2 | 0  | Low-quality | 18.7  |
| Sample_T15B_k141_111165           | 8861   | 9   | 0 | 2  | Low-quality | 18.69 |
| Sample_T16A_k141_58125            | 14329  | 16  | 0 | 2  | Low-quality | 18.69 |
| Sample_C14A_k141_216897           | 11689  | 12  | 3 | 3  | Low-quality | 18.69 |
| Sample_C3A_k141_74740_fragment_1  | 7452   | 10  | 2 | 0  | Low-quality | 18.69 |
| Sample_T14B_k141_111968           | 24377  | 24  | 1 | 8  | Low-quality | 18.68 |
| Sample_C11B_k141_186527           | 8086   | 14  | 3 | 0  | Low-quality | 18.68 |
| Sample_T11B_k141_60919            | 6673   | 11  | 3 | 0  | Low-quality | 18.68 |
| Sample_T16A_k141_70977            | 7009   | 15  | 6 | 0  | Low-quality | 18.68 |
| Sample_T16B_k141_40537            | 11275  | 26  | 6 | 0  | Low-quality | 18.68 |
| Sample_T3A_k141_29159             | 9029   | 11  | 4 | 0  | Low-quality | 18.68 |
| Sample_T10A_k141_70062            | 11180  | 15  | 1 | 7  | Low-quality | 18.67 |
| Sample_T16C_k141_67381            | 11816  | 12  | 3 | 2  | Low-quality | 18.67 |
| Sample_T10A_k141_160919           | 26068  | 21  | 1 | 16 | Low-quality | 18.66 |
| Sample_T4C_k141_27167             | 9848   | 13  | 3 | 0  | Low-quality | 18.66 |
| Sample_T6C_k141_237734_fragment_1 | 9896   | 14  | 4 | 1  | Low-quality | 18.66 |
| Sample_C6A_k141_165089            | 45912  | 47  | 1 | 21 | Low-quality | 18.65 |
| Sample_C8C_k141_9868              | 16656  | 13  | 1 | 5  | Low-quality | 18.65 |
| Sample_T15B_k141_47464            | 29566  | 35  | 1 | 9  | Low-quality | 18.65 |
| Sample_T15C_k141_129117           | 7662   | 7   | 0 | 2  | Low-quality | 18.65 |

|                                  |        |     |    |     |             |       |
|----------------------------------|--------|-----|----|-----|-------------|-------|
| Sample_T2C_k141_3385             | 6711   | 7   | 5  | 0   | Low-quality | 18.65 |
| Sample_T13A_k141_28515           | 17573  | 18  | 0  | 5   | Low-quality | 18.64 |
| Sample_T2C_k141_227033           | 51455  | 45  | 3  | 15  | Low-quality | 18.64 |
| Sample_T13B_k141_15005           | 12322  | 9   | 1  | 0   | Low-quality | 18.64 |
| Sample_T10B_k141_109888          | 7418   | 8   | 3  | 0   | Low-quality | 18.63 |
| Sample_T18B_k141_141979          | 9805   | 14  | 5  | 0   | Low-quality | 18.63 |
| Sample_T7C_k141_128952           | 8404   | 16  | 1  | 0   | Low-quality | 18.63 |
| Sample_T5B_k141_2436             | 15040  | 8   | 0  | 1   | Low-quality | 18.62 |
| Sample_T8C_k141_163302           | 11145  | 11  | 0  | 2   | Low-quality | 18.62 |
| Sample_T3C_k141_71700_fragment_1 | 27982  | 27  | 4  | 3   | Low-quality | 18.62 |
| Sample_T10C_k141_3519            | 6967   | 11  | 8  | 0   | Low-quality | 18.61 |
| Sample_C13A_k141_112985          | 7594   | 10  | 1  | 0   | Low-quality | 18.59 |
| Sample_T8C_k141_8856             | 7410   | 15  | 2  | 0   | Low-quality | 18.59 |
| Sample_C13B_k141_37760           | 44203  | 34  | 1  | 25  | Low-quality | 18.58 |
| Sample_T16B_k141_10725           | 12277  | 16  | 1  | 0   | Low-quality | 18.58 |
| Sample_T7A_k141_93824            | 17446  | 17  | 0  | 3   | Low-quality | 18.58 |
| Sample_C10C_k141_58021           | 8186   | 10  | 7  | 0   | Low-quality | 18.58 |
| Sample_C2A_k141_33789_fragment_1 | 7559   | 12  | 5  | 0   | Low-quality | 18.58 |
| Sample_C2C_k141_215680           | 7889   | 10  | 3  | 0   | Low-quality | 18.58 |
| Sample_T17B_k141_26289           | 8287   | 5   | 4  | 0   | Low-quality | 18.57 |
| Sample_C11A_k141_62577           | 20054  | 18  | 0  | 6   | Low-quality | 18.56 |
| Sample_C14A_k141_102751          | 7907   | 14  | 6  | 0   | Low-quality | 18.56 |
| Sample_T2C_k141_235971           | 8010   | 8   | 2  | 0   | Low-quality | 18.56 |
| Sample_C6C_k141_89136            | 9252   | 12  | 5  | 0   | Low-quality | 18.55 |
| Sample_T11B_k141_54552           | 37455  | 28  | 0  | 24  | Low-quality | 18.55 |
| Sample_T11B_k141_13900           | 7746   | 12  | 1  | 0   | Low-quality | 18.55 |
| Sample_T4C_k141_41100            | 16692  | 18  | 0  | 2   | Low-quality | 18.55 |
| Sample_C12A_k141_168667          | 7066   | 16  | 6  | 0   | Low-quality | 18.55 |
| Sample_C2B_k141_340289           | 10069  | 16  | 0  | 0   | Low-quality | 18.55 |
| Sample_T17A_k141_11544           | 8395   | 13  | 5  | 0   | Low-quality | 18.55 |
| Sample_T8C_k141_23708            | 6952   | 10  | 10 | 0   | Low-quality | 18.55 |
| Sample_C11B_k141_166345          | 25715  | 31  | 1  | 4   | Low-quality | 18.53 |
| Sample_C14C_k141_130951          | 40466  | 49  | 0  | 27  | Low-quality | 18.53 |
| Sample_C2C_k141_49589            | 19016  | 10  | 0  | 8   | Low-quality | 18.53 |
| Sample_T6B_k141_54134            | 12839  | 16  | 4  | 0   | Low-quality | 18.53 |
| Sample_C4B_k141_236134           | 10099  | 7   | 3  | 0   | Low-quality | 18.52 |
| Sample_C9A_k141_57077_fragment_1 | 16672  | 17  | 0  | 1   | Low-quality | 18.52 |
| Sample_T8C_k141_50781            | 8234   | 11  | 0  | 3   | Low-quality | 18.51 |
| Sample_C13C_k141_37916           | 220675 | 198 | 1  | 144 | Low-quality | 18.5  |



|                                    |        |    |   |    |             |       |
|------------------------------------|--------|----|---|----|-------------|-------|
| Sample_C3B_k141_167649             | 12225  | 13 | 1 | 1  | Low-quality | 18.5  |
| Sample_C10A_k141_305126            | 6737   | 10 | 5 | 0  | Low-quality | 18.5  |
| Sample_C4A_k141_112973             | 7850   | 12 | 4 | 0  | Low-quality | 18.5  |
| Sample_T6B_k141_11857              | 6666   | 12 | 8 | 0  | Low-quality | 18.5  |
| Sample_C2B_k141_346598             | 5919   | 16 | 2 | 0  | Low-quality | 18.49 |
| Sample_T17B_k141_646               | 11063  | 14 | 0 | 6  | Low-quality | 18.48 |
| Sample_T8B_k141_156328             | 7152   | 5  | 0 | 1  | Low-quality | 18.48 |
| Sample_T2C_k141_203090             | 40035  | 41 | 1 | 28 | Low-quality | 18.47 |
| Sample_C3A_k141_241605_fragment_1  | 16138  | 20 | 3 | 0  | Low-quality | 18.47 |
| Sample_C3A_k141_95943              | 8600   | 11 | 5 | 0  | Low-quality | 18.47 |
| Sample_T12A_k141_109922_fragment_1 | 8156   | 14 | 3 | 0  | Low-quality | 18.46 |
| Sample_T17C_k141_18446             | 6445   | 8  | 4 | 0  | Low-quality | 18.46 |
| Sample_T10B_k141_142038            | 8309   | 15 | 6 | 0  | Low-quality | 18.45 |
| Sample_T15C_k141_19954             | 8579   | 8  | 0 | 2  | Low-quality | 18.45 |
| Sample_T12A_k141_246707            | 7522   | 14 | 4 | 0  | Low-quality | 18.45 |
| Sample_C1B_k141_166057             | 5924   | 13 | 1 | 0  | Low-quality | 18.44 |
| Sample_C1B_k141_252152             | 62594  | 60 | 1 | 36 | Low-quality | 18.44 |
| Sample_C6B_k141_73825              | 100977 | 83 | 1 | 58 | Low-quality | 18.44 |
| Sample_T7A_k141_154703             | 27433  | 35 | 1 | 1  | Low-quality | 18.44 |
| Sample_T5B_k141_11698              | 8562   | 11 | 0 | 10 | Low-quality | 18.43 |
| Sample_C14C_k141_139705            | 14127  | 18 | 1 | 0  | Low-quality | 18.43 |
| Sample_T6C_k141_50733              | 18533  | 19 | 3 | 0  | Low-quality | 18.43 |
| Sample_T18B_k141_73503             | 9883   | 11 | 2 | 0  | Low-quality | 18.42 |
| Sample_T11B_k141_42852             | 30422  | 28 | 1 | 21 | Low-quality | 18.41 |
| Sample_T16C_k141_60556             | 18719  | 14 | 0 | 11 | Low-quality | 18.41 |
| Sample_C11C_k141_181207            | 8669   | 16 | 3 | 0  | Low-quality | 18.41 |
| Sample_T6B_k141_109451_fragment_1  | 20396  | 20 | 4 | 3  | Low-quality | 18.4  |
| Sample_C8B_k141_75275              | 8273   | 17 | 5 | 0  | Low-quality | 18.39 |
| Sample_C5B_k141_13419              | 8722   | 9  | 2 | 0  | Low-quality | 18.39 |
| Sample_T12A_k141_160395            | 7291   | 14 | 1 | 0  | Low-quality | 18.38 |
| Sample_C6B_k141_48527              | 28711  | 25 | 1 | 17 | Low-quality | 18.37 |
| Sample_T12A_k141_325095            | 6617   | 10 | 5 | 0  | Low-quality | 18.37 |
| Sample_T4C_k141_81207              | 12943  | 20 | 7 | 0  | Low-quality | 18.37 |
| Sample_C7A_k141_50070              | 11616  | 14 | 8 | 0  | Low-quality | 18.36 |
| Sample_T10A_k141_75311             | 6993   | 13 | 4 | 0  | Low-quality | 18.36 |
| Sample_T15B_k141_124552            | 10985  | 13 | 1 | 2  | Low-quality | 18.35 |
| Sample_C3A_k141_130930             | 29055  | 30 | 1 | 9  | Low-quality | 18.33 |
| Sample_C8C_k141_57367              | 18384  | 16 | 0 | 4  | Low-quality | 18.33 |
| Sample_T8B_k141_120692             | 12112  | 14 | 1 | 7  | Low-quality | 18.33 |

|                                  |       |    |    |    |             |       |
|----------------------------------|-------|----|----|----|-------------|-------|
| Sample_C8B_k141_150888           | 10564 | 24 | 1  | 2  | Low-quality | 18.33 |
| Sample_T8C_k141_93558_fragment_1 | 8551  | 12 | 6  | 0  | Low-quality | 18.33 |
| Sample_C3A_k141_67794            | 7429  | 8  | 0  | 0  | Low-quality | 18.32 |
| Sample_T13B_k141_117285          | 9145  | 10 | 1  | 8  | Low-quality | 18.32 |
| Sample_C13A_k141_53145           | 15463 | 21 | 5  | 0  | Low-quality | 18.32 |
| Sample_C3C_k141_49601            | 7252  | 9  | 2  | 0  | Low-quality | 18.32 |
| Sample_T2B_k141_183984           | 8165  | 8  | 2  | 0  | Low-quality | 18.32 |
| Sample_T6C_k141_58182_fragment_1 | 11964 | 11 | 1  | 1  | Low-quality | 18.32 |
| Sample_C6B_k141_8820             | 9743  | 4  | 0  | 0  | Low-quality | 18.31 |
| Sample_T12A_k141_257086          | 7721  | 3  | 0  | 2  | Low-quality | 18.31 |
| Sample_T18A_k141_77016           | 7241  | 16 | 6  | 0  | Low-quality | 18.31 |
| Sample_T4B_k141_275852           | 7220  | 16 | 1  | 0  | Low-quality | 18.31 |
| Sample_T8A_k141_75637            | 8989  | 16 | 1  | 0  | Low-quality | 18.31 |
| Sample_T12A_k141_14734           | 14046 | 13 | 0  | 1  | Low-quality | 18.3  |
| Sample_T13A_k141_99776           | 11763 | 16 | 0  | 8  | Low-quality | 18.3  |
| Sample_T4C_k141_88814            | 9138  | 19 | 1  | 4  | Low-quality | 18.3  |
| Sample_T16C_k141_291             | 7834  | 11 | 7  | 0  | Low-quality | 18.3  |
| Sample_T2C_k141_22601            | 6190  | 7  | 4  | 0  | Low-quality | 18.3  |
| Sample_C4C_k141_220295           | 7520  | 12 | 3  | 0  | Low-quality | 18.29 |
| Sample_T8A_k141_5033             | 14835 | 23 | 1  | 5  | Low-quality | 18.28 |
| Sample_T8B_k141_91689            | 6415  | 14 | 11 | 0  | Low-quality | 18.28 |
| Sample_C10B_k141_76544           | 13599 | 16 | 1  | 6  | Low-quality | 18.27 |
| Sample_C7B_k141_11099            | 8633  | 16 | 1  | 2  | Low-quality | 18.27 |
| Sample_C14A_k141_112331          | 8472  | 9  | 3  | 0  | Low-quality | 18.27 |
| Sample_C6B_k141_203093           | 6979  | 8  | 5  | 0  | Low-quality | 18.27 |
| Sample_C6C_k141_98001            | 9641  | 13 | 3  | 0  | Low-quality | 18.27 |
| Sample_C10A_k141_58424           | 16658 | 11 | 0  | 10 | Low-quality | 18.25 |
| Sample_C11C_k141_151918          | 6373  | 13 | 1  | 1  | Low-quality | 18.25 |
| Sample_C12B_k141_39507           | 6964  | 9  | 2  | 1  | Low-quality | 18.25 |
| Sample_C12C_k141_219221          | 7066  | 13 | 2  | 1  | Low-quality | 18.25 |
| Sample_C3A_k141_56574            | 14801 | 15 | 6  | 1  | Low-quality | 18.25 |
| Sample_C9C_k141_65758            | 8772  | 8  | 0  | 5  | Low-quality | 18.24 |
| Sample_C5A_k141_149031           | 8128  | 12 | 11 | 0  | Low-quality | 18.24 |
| Sample_T3B_k141_90116            | 11631 | 20 | 4  | 0  | Low-quality | 18.24 |
| Sample_C11A_k141_9999            | 9241  | 12 | 0  | 5  | Low-quality | 18.23 |
| Sample_C2C_k141_69094            | 27393 | 23 | 1  | 14 | Low-quality | 18.23 |
| Sample_T12A_k141_64947           | 6714  | 8  | 0  | 5  | Low-quality | 18.23 |
| Sample_C1A_k141_16147            | 10089 | 13 | 6  | 0  | Low-quality | 18.23 |
| Sample_T6B_k141_27529            | 7097  | 15 | 1  | 0  | Low-quality | 18.23 |

|                         |       |    |    |    |             |       |
|-------------------------|-------|----|----|----|-------------|-------|
| Sample_C10A_k141_207755 | 26290 | 22 | 0  | 7  | Low-quality | 18.22 |
| Sample_C12C_k141_172629 | 47744 | 49 | 1  | 25 | Low-quality | 18.22 |
| Sample_C1A_k141_58261   | 16417 | 15 | 0  | 12 | Low-quality | 18.22 |
| Sample_T2A_k141_31717   | 16202 | 14 | 0  | 4  | Low-quality | 18.22 |
| Sample_C1A_k141_5512    | 7985  | 16 | 4  | 0  | Low-quality | 18.22 |
| Sample_C3A_k141_168519  | 8316  | 11 | 5  | 0  | Low-quality | 18.22 |
| Sample_T14C_k141_143535 | 7095  | 13 | 1  | 0  | Low-quality | 18.22 |
| Sample_T6C_k141_149014  | 7728  | 11 | 5  | 0  | Low-quality | 18.22 |
| Sample_C1C_k141_184481  | 6952  | 12 | 1  | 1  | Low-quality | 18.21 |
| Sample_C5B_k141_85440   | 6803  | 4  | 2  | 0  | Low-quality | 18.2  |
| Sample_T7A_k141_122327  | 9055  | 16 | 0  | 1  | Low-quality | 18.2  |
| Sample_C5C_k141_14962   | 7243  | 8  | 5  | 0  | Low-quality | 18.19 |
| Sample_T6C_k141_228849  | 8892  | 14 | 2  | 0  | Low-quality | 18.19 |
| Sample_T4B_k141_183730  | 6071  | 4  | 3  | 0  | Low-quality | 18.18 |
| Sample_T12A_k141_133427 | 13460 | 19 | 3  | 3  | Low-quality | 18.17 |
| Sample_C6B_k141_69117   | 8113  | 7  | 0  | 1  | Low-quality | 18.16 |
| Sample_T11C_k141_111530 | 38567 | 31 | 2  | 4  | Low-quality | 18.16 |
| Sample_C3C_k141_82010   | 10279 | 19 | 5  | 2  | Low-quality | 18.16 |
| Sample_T13B_k141_184399 | 6730  | 8  | 0  | 0  | Low-quality | 18.15 |
| Sample_T8B_k141_239031  | 7216  | 8  | 1  | 0  | Low-quality | 18.15 |
| Sample_C10A_k141_19478  | 32375 | 33 | 1  | 10 | Low-quality | 18.14 |
| Sample_C8B_k141_118927  | 7974  | 7  | 1  | 2  | Low-quality | 18.14 |
| Sample_T12C_k141_133461 | 30191 | 32 | 0  | 12 | Low-quality | 18.14 |
| Sample_T7A_k141_24220   | 6909  | 5  | 0  | 5  | Low-quality | 18.14 |
| Sample_C2C_k141_303564  | 8615  | 14 | 10 | 0  | Low-quality | 18.14 |
| Sample_C8C_k141_33278   | 14356 | 11 | 0  | 2  | Low-quality | 18.13 |
| Sample_C11C_k141_655    | 8104  | 9  | 7  | 0  | Low-quality | 18.13 |
| Sample_C13A_k141_31027  | 12260 | 16 | 1  | 1  | Low-quality | 18.13 |
| Sample_C11B_k141_33710  | 30102 | 35 | 9  | 9  | Low-quality | 18.12 |
| Sample_C12C_k141_193865 | 11096 | 17 | 3  | 1  | Low-quality | 18.12 |
| Sample_T3A_k141_7482    | 20928 | 25 | 0  | 4  | Low-quality | 18.12 |
| Sample_C12A_k141_179641 | 7181  | 9  | 0  | 0  | Low-quality | 18.12 |
| Sample_C1A_k141_246673  | 10593 | 21 | 2  | 0  | Low-quality | 18.12 |
| Sample_T12B_k141_166369 | 9716  | 22 | 5  | 0  | Low-quality | 18.12 |
| Sample_T16B_k141_82067  | 18078 | 28 | 2  | 0  | Low-quality | 18.12 |
| Sample_T16A_k141_1552   | 31744 | 42 | 4  | 2  | Low-quality | 18.11 |
| Sample_C5A_k141_50413   | 9714  | 13 | 2  | 0  | Low-quality | 18.11 |
| Sample_T13A_k141_97864  | 8408  | 14 | 10 | 0  | Low-quality | 18.11 |
| Sample_C10C_k141_208958 | 6969  | 6  | 3  | 0  | Low-quality | 18.1  |

|                                   |        |     |    |     |             |       |
|-----------------------------------|--------|-----|----|-----|-------------|-------|
| Sample_C12A_k141_124610           | 6595   | 6   | 4  | 0   | Low-quality | 18.1  |
| Sample_T3A_k141_101752            | 6883   | 14  | 13 | 0   | Low-quality | 18.1  |
| Sample_T14A_k141_204256           | 11955  | 15  | 1  | 3   | Low-quality | 18.09 |
| Sample_C1B_k141_237133            | 6448   | 11  | 0  | 0   | Low-quality | 18.09 |
| Sample_C2A_k141_246990            | 8501   | 12  | 7  | 1   | Low-quality | 18.09 |
| Sample_T16B_k141_117560           | 6952   | 13  | 2  | 0   | Low-quality | 18.09 |
| Sample_T2C_k141_37396             | 40846  | 48  | 1  | 29  | Low-quality | 18.08 |
| Sample_T4B_k141_339787            | 6850   | 13  | 7  | 0   | Low-quality | 18.08 |
| Sample_T4C_k141_35655             | 8917   | 14  | 9  | 0   | Low-quality | 18.08 |
| Sample_C8A_k141_95728             | 13860  | 14  | 0  | 1   | Low-quality | 18.07 |
| Sample_T16C_k141_11060            | 7996   | 11  | 4  | 0   | Low-quality | 18.07 |
| Sample_T6A_k141_268722            | 9660   | 14  | 10 | 0   | Low-quality | 18.07 |
| Sample_C2A_k141_263609            | 15882  | 17  | 2  | 1   | Low-quality | 18.06 |
| Sample_C14A_k141_496              | 7327   | 10  | 5  | 0   | Low-quality | 18.06 |
| Sample_C6C_k141_151186            | 17625  | 13  | 0  | 10  | Low-quality | 18.05 |
| Sample_T2B_k141_95629             | 145402 | 128 | 2  | 107 | Low-quality | 18.05 |
| Sample_T11C_k141_45258            | 19544  | 36  | 7  | 0   | Low-quality | 18.05 |
| Sample_T3B_k141_121043            | 11248  | 30  | 3  | 1   | Low-quality | 18.05 |
| Sample_T10B_k141_80919            | 17853  | 13  | 0  | 6   | Low-quality | 18.04 |
| Sample_T5B_k141_77572             | 19483  | 25  | 0  | 4   | Low-quality | 18.04 |
| Sample_T4B_k141_320946            | 6833   | 19  | 7  | 0   | Low-quality | 18.03 |
| Sample_T10B_k141_147383           | 11440  | 13  | 0  | 4   | Low-quality | 18.02 |
| Sample_T5B_k141_23090             | 27964  | 20  | 1  | 16  | Low-quality | 18    |
| Sample_C10A_k141_115272           | 8179   | 12  | 4  | 0   | Low-quality | 17.99 |
| Sample_C3A_k141_172804            | 8225   | 9   | 0  | 0   | Low-quality | 17.99 |
| Sample_T15C_k141_103168           | 6698   | 11  | 2  | 0   | Low-quality | 17.99 |
| Sample_C7C_k141_11597             | 13138  | 11  | 1  | 1   | Low-quality | 17.97 |
| Sample_T3A_k141_17537             | 10666  | 10  | 0  | 3   | Low-quality | 17.97 |
| Sample_T2B_k141_13958             | 6016   | 7   | 4  | 0   | Low-quality | 17.97 |
| Sample_C11A_k141_63100            | 19715  | 23  | 1  | 5   | Low-quality | 17.95 |
| Sample_T11B_k141_84804            | 26148  | 51  | 9  | 5   | Low-quality | 17.95 |
| Sample_C3A_k141_216058_fragment_1 | 19122  | 26  | 6  | 2   | Low-quality | 17.94 |
| Sample_T14B_k141_116394           | 12236  | 9   | 1  | 2   | Low-quality | 17.94 |
| Sample_T16B_k141_90279            | 9308   | 6   | 1  | 0   | Low-quality | 17.94 |
| Sample_T7C_k141_27582             | 16449  | 16  | 0  | 11  | Low-quality | 17.93 |
| Sample_T8C_k141_16115             | 10732  | 13  | 0  | 0   | Low-quality | 17.93 |
| Sample_C10B_k141_13094_fragment_1 | 25311  | 26  | 2  | 4   | Low-quality | 17.93 |
| Sample_T4B_k141_262362            | 7578   | 13  | 4  | 0   | Low-quality | 17.93 |
| Sample_C10A_k141_84805            | 9388   | 13  | 2  | 1   | Low-quality | 17.92 |

|                                    |       |    |    |    |             |       |
|------------------------------------|-------|----|----|----|-------------|-------|
| Sample_T4B_k141_151096             | 7039  | 11 | 3  | 0  | Low-quality | 17.92 |
| Sample_T5C_k141_63900              | 10503 | 18 | 3  | 0  | Low-quality | 17.92 |
| Sample_C12A_k141_73626             | 9573  | 9  | 3  | 1  | Low-quality | 17.91 |
| Sample_T5B_k141_32950              | 7494  | 12 | 2  | 0  | Low-quality | 17.91 |
| Sample_C10A_k141_77048             | 21230 | 31 | 2  | 2  | Low-quality | 17.9  |
| Sample_T5C_k141_132587             | 7623  | 9  | 0  | 2  | Low-quality | 17.9  |
| Sample_C5A_k141_192226             | 8358  | 11 | 6  | 0  | Low-quality | 17.9  |
| Sample_T17B_k141_18471             | 8456  | 9  | 3  | 0  | Low-quality | 17.9  |
| Sample_C4C_k141_96300              | 5948  | 7  | 0  | 5  | Low-quality | 17.89 |
| Sample_C1C_k141_161500             | 8657  | 9  | 1  | 0  | Low-quality | 17.89 |
| Sample_C11C_k141_121873            | 17804 | 16 | 0  | 6  | Low-quality | 17.88 |
| Sample_T16A_k141_29033             | 23433 | 25 | 1  | 9  | Low-quality | 17.88 |
| Sample_C1B_k141_260303             | 11762 | 22 | 2  | 0  | Low-quality | 17.88 |
| Sample_C2B_k141_15079_fragment_1   | 9451  | 17 | 4  | 2  | Low-quality | 17.88 |
| Sample_T15C_k141_128793_fragment_1 | 8527  | 15 | 3  | 0  | Low-quality | 17.88 |
| Sample_T14A_k141_52922             | 6412  | 9  | 6  | 0  | Low-quality | 17.86 |
| Sample_C4B_k141_144223             | 5122  | 3  | 0  | 1  | Low-quality | 17.85 |
| Sample_T14B_k141_47446             | 10686 | 14 | 0  | 1  | Low-quality | 17.85 |
| Sample_T3B_k141_153027_fragment_1  | 7653  | 9  | 0  | 0  | Low-quality | 17.85 |
| Sample_C11A_k141_147038            | 32300 | 73 | 4  | 1  | Low-quality | 17.84 |
| Sample_C11B_k141_149128            | 8154  | 12 | 8  | 0  | Low-quality | 17.84 |
| Sample_T2C_k141_48393              | 6651  | 13 | 1  | 0  | Low-quality | 17.84 |
| Sample_C10B_k141_138077            | 6503  | 5  | 1  | 0  | Low-quality | 17.83 |
| Sample_C1C_k141_44760              | 7472  | 9  | 3  | 0  | Low-quality | 17.83 |
| Sample_C3A_k141_173538_fragment_1  | 22284 | 18 | 1  | 3  | Low-quality | 17.83 |
| Sample_T17A_k141_1949              | 7003  | 12 | 12 | 0  | Low-quality | 17.82 |
| Sample_T2B_k141_148774             | 7648  | 6  | 2  | 0  | Low-quality | 17.82 |
| Sample_T5C_k141_169664             | 8006  | 16 | 5  | 0  | Low-quality | 17.82 |
| Sample_C10B_k141_100594            | 23870 | 25 | 1  | 20 | Low-quality | 17.81 |
| Sample_T14A_k141_232112            | 7416  | 4  | 1  | 0  | Low-quality | 17.81 |
| Sample_T15C_k141_126828            | 7101  | 10 | 1  | 0  | Low-quality | 17.8  |
| Sample_T17B_k141_31554             | 23183 | 16 | 0  | 16 | Low-quality | 17.8  |
| Sample_C2A_k141_249383             | 6453  | 9  | 6  | 0  | Low-quality | 17.8  |
| Sample_C2A_k141_1284               | 14197 | 24 | 2  | 1  | Low-quality | 17.8  |
| Sample_C3C_k141_113957             | 25423 | 48 | 3  | 1  | Low-quality | 17.8  |
| Sample_T6B_k141_144238             | 10544 | 6  | 0  | 0  | Low-quality | 17.79 |
| Sample_C8B_k141_196703             | 10919 | 20 | 3  | 0  | Low-quality | 17.79 |
| Sample_T12C_k141_144280_fragment_1 | 6705  | 11 | 1  | 0  | Low-quality | 17.79 |
| Sample_T10A_k141_178754            | 23767 | 26 | 6  | 2  | Low-quality | 17.78 |

|                                   |       |    |   |    |             |       |
|-----------------------------------|-------|----|---|----|-------------|-------|
| Sample_T8B_k141_105371            | 7471  | 7  | 0 | 4  | Low-quality | 17.78 |
| Sample_C10A_k141_209114           | 8760  | 16 | 2 | 0  | Low-quality | 17.78 |
| Sample_C13A_k141_111433           | 7173  | 8  | 1 | 1  | Low-quality | 17.78 |
| Sample_C1C_k141_60337             | 18309 | 14 | 0 | 4  | Low-quality | 17.77 |
| Sample_T17C_k141_12670            | 49909 | 34 | 1 | 24 | Low-quality | 17.77 |
| Sample_T4B_k141_72262             | 6786  | 7  | 0 | 3  | Low-quality | 17.77 |
| Sample_C3A_k141_182167            | 28296 | 37 | 6 | 2  | Low-quality | 17.77 |
| Sample_C9A_k141_29795             | 38875 | 45 | 3 | 3  | Low-quality | 17.77 |
| Sample_T12B_k141_166463           | 35337 | 76 | 4 | 2  | Low-quality | 17.76 |
| Sample_T2B_k141_262902            | 37674 | 27 | 1 | 20 | Low-quality | 17.76 |
| Sample_T6B_k141_88831             | 32227 | 38 | 4 | 1  | Low-quality | 17.76 |
| Sample_C1B_k141_136487            | 7474  | 7  | 3 | 0  | Low-quality | 17.76 |
| Sample_T4B_k141_293222            | 9270  | 13 | 2 | 0  | Low-quality | 17.76 |
| Sample_C10C_k141_159426           | 9785  | 15 | 0 | 3  | Low-quality | 17.75 |
| Sample_T14B_k141_99522_fragment_1 | 14061 | 23 | 6 | 0  | Low-quality | 17.75 |
| Sample_C3A_k141_4850              | 8394  | 9  | 0 | 1  | Low-quality | 17.74 |
| Sample_C3B_k141_189379            | 5682  | 6  | 0 | 3  | Low-quality | 17.74 |
| Sample_T13C_k141_123705           | 12936 | 13 | 2 | 2  | Low-quality | 17.74 |
| Sample_T5A_k141_18362             | 7238  | 7  | 0 | 1  | Low-quality | 17.74 |
| Sample_C10C_k141_8023_fragment_1  | 11134 | 10 | 3 | 2  | Low-quality | 17.73 |
| Sample_C3C_k141_234389            | 8513  | 13 | 6 | 0  | Low-quality | 17.73 |
| Sample_C8C_k141_41767             | 7180  | 11 | 6 | 0  | Low-quality | 17.73 |
| Sample_T8C_k141_184566            | 6239  | 9  | 4 | 0  | Low-quality | 17.73 |
| Sample_T12A_k141_233224           | 13822 | 4  | 2 | 0  | Low-quality | 17.72 |
| Sample_T12A_k141_168575           | 38348 | 35 | 1 | 24 | Low-quality | 17.72 |
| Sample_C12C_k141_3100             | 7536  | 10 | 6 | 0  | Low-quality | 17.72 |
| Sample_C14A_k141_218326           | 8602  | 13 | 1 | 0  | Low-quality | 17.72 |
| Sample_T2B_k141_147705            | 8300  | 13 | 9 | 0  | Low-quality | 17.72 |
| Sample_C2B_k141_98041             | 31613 | 33 | 1 | 12 | Low-quality | 17.71 |
| Sample_C9B_k141_6752              | 9054  | 10 | 8 | 1  | Low-quality | 17.71 |
| Sample_T6C_k141_173514            | 7269  | 13 | 9 | 0  | Low-quality | 17.71 |
| Sample_T15C_k141_141171           | 14462 | 16 | 0 | 2  | Low-quality | 17.7  |
| Sample_T4B_k141_231096            | 6514  | 10 | 4 | 0  | Low-quality | 17.7  |
| Sample_C6B_k141_170904            | 17371 | 16 | 3 | 5  | Low-quality | 17.69 |
| Sample_T6B_k141_12814             | 34263 | 27 | 1 | 6  | Low-quality | 17.69 |
| Sample_T17B_k141_28955            | 6940  | 12 | 9 | 0  | Low-quality | 17.69 |
| Sample_T17B_k141_10112            | 14291 | 31 | 1 | 1  | Low-quality | 17.69 |
| Sample_T6A_k141_172159            | 7239  | 10 | 2 | 0  | Low-quality | 17.69 |
| Sample_T5C_k141_136782            | 30857 | 28 | 0 | 20 | Low-quality | 17.68 |

|                                   |       |    |   |    |             |       |
|-----------------------------------|-------|----|---|----|-------------|-------|
| Sample_C2A_k141_114192            | 11384 | 14 | 3 | 1  | Low-quality | 17.67 |
| Sample_T11C_k141_111801           | 11836 | 23 | 2 | 1  | Low-quality | 17.67 |
| Sample_T14A_k141_35644_fragment_1 | 9656  | 12 | 0 | 2  | Low-quality | 17.66 |
| Sample_T8C_k141_167792            | 7088  | 12 | 0 | 0  | Low-quality | 17.66 |
| Sample_C6A_k141_106492            | 14528 | 14 | 0 | 3  | Low-quality | 17.65 |
| Sample_C9A_k141_68035             | 7441  | 10 | 5 | 0  | Low-quality | 17.64 |
| Sample_C10C_k141_121628           | 7255  | 13 | 0 | 0  | Low-quality | 17.62 |
| Sample_T11C_k141_18222            | 9648  | 8  | 1 | 3  | Low-quality | 17.62 |
| Sample_T5C_k141_154013            | 27224 | 29 | 1 | 14 | Low-quality | 17.62 |
| Sample_T6A_k141_36125             | 6109  | 7  | 0 | 2  | Low-quality | 17.62 |
| Sample_C2A_k141_130295            | 7025  | 12 | 8 | 0  | Low-quality | 17.62 |
| Sample_C1B_k141_168123            | 13652 | 5  | 0 | 2  | Low-quality | 17.61 |
| Sample_T6A_k141_42075             | 16893 | 20 | 1 | 8  | Low-quality | 17.61 |
| Sample_C6C_k141_210997            | 14382 | 13 | 0 | 10 | Low-quality | 17.6  |
| Sample_T4B_k141_111845            | 10344 | 10 | 1 | 0  | Low-quality | 17.6  |
| Sample_C5A_k141_284994            | 12414 | 13 | 0 | 3  | Low-quality | 17.59 |
| Sample_C13C_k141_68373            | 6805  | 16 | 1 | 0  | Low-quality | 17.59 |
| Sample_T18A_k141_47670            | 7151  | 11 | 6 | 0  | Low-quality | 17.59 |
| Sample_C5B_k141_21922             | 7655  | 10 | 0 | 1  | Low-quality | 17.58 |
| Sample_C6B_k141_206955            | 10312 | 13 | 0 | 3  | Low-quality | 17.58 |
| Sample_T10B_k141_101772           | 7387  | 8  | 0 | 4  | Low-quality | 17.58 |
| Sample_T7C_k141_72787_fragment_1  | 8344  | 15 | 2 | 0  | Low-quality | 17.58 |
| Sample_C5A_k141_258047            | 22926 | 31 | 1 | 25 | Low-quality | 17.57 |
| Sample_C1C_k141_47847             | 18909 | 22 | 0 | 3  | Low-quality | 17.56 |
| Sample_T6B_k141_114822            | 8163  | 7  | 0 | 1  | Low-quality | 17.56 |
| Sample_C3B_k141_249270            | 10146 | 31 | 1 | 0  | Low-quality | 17.56 |
| Sample_T12B_k141_46528            | 10415 | 18 | 6 | 0  | Low-quality | 17.56 |
| Sample_T16B_k141_159383           | 17373 | 11 | 0 | 6  | Low-quality | 17.55 |
| Sample_T3B_k141_119984            | 8759  | 17 | 1 | 3  | Low-quality | 17.55 |
| Sample_C2A_k141_135771            | 6139  | 7  | 6 | 0  | Low-quality | 17.55 |
| Sample_T11C_k141_12545            | 7293  | 10 | 4 | 0  | Low-quality | 17.55 |
| Sample_T3B_k141_8532              | 7526  | 13 | 0 | 1  | Low-quality | 17.55 |
| Sample_C3A_k141_241860_fragment_1 | 7313  | 8  | 2 | 0  | Low-quality | 17.54 |
| Sample_C4B_k141_126326            | 7753  | 18 | 2 | 1  | Low-quality | 17.53 |
| Sample_C11C_k141_104358           | 10453 | 8  | 0 | 2  | Low-quality | 17.52 |
| Sample_C3A_k141_697               | 14155 | 17 | 1 | 6  | Low-quality | 17.52 |
| Sample_C6C_k141_235463            | 28940 | 31 | 1 | 15 | Low-quality | 17.52 |
| Sample_C8C_k141_162361            | 15590 | 20 | 2 | 8  | Low-quality | 17.52 |
| Sample_T16C_k141_24030            | 5751  | 9  | 3 | 0  | Low-quality | 17.52 |

|                                   |       |    |   |    |             |       |
|-----------------------------------|-------|----|---|----|-------------|-------|
| Sample_T6B_k141_100490            | 6278  | 5  | 4 | 0  | Low-quality | 17.52 |
| Sample_T5C_k141_69959             | 26053 | 30 | 1 | 5  | Low-quality | 17.51 |
| Sample_C4A_k141_64230_fragment_2  | 11704 | 19 | 1 | 0  | Low-quality | 17.51 |
| Sample_C7C_k141_51301             | 11879 | 12 | 1 | 3  | Low-quality | 17.51 |
| Sample_C7C_k141_21048             | 11404 | 14 | 4 | 0  | Low-quality | 17.5  |
| Sample_C8C_k141_92655             | 38119 | 40 | 0 | 28 | Low-quality | 17.5  |
| Sample_T3C_k141_35124             | 15180 | 16 | 3 | 1  | Low-quality | 17.5  |
| Sample_C13B_k141_113319           | 7027  | 6  | 3 | 0  | Low-quality | 17.5  |
| Sample_C1A_k141_94416             | 7063  | 5  | 3 | 0  | Low-quality | 17.5  |
| Sample_T16B_k141_166509           | 6936  | 11 | 6 | 0  | Low-quality | 17.5  |
| Sample_C9B_k141_18857             | 7398  | 9  | 1 | 0  | Low-quality | 17.49 |
| Sample_C1B_k141_276023            | 6977  | 11 | 5 | 0  | Low-quality | 17.49 |
| Sample_C1B_k141_216389            | 7397  | 14 | 5 | 0  | Low-quality | 17.49 |
| Sample_C2B_k141_184443            | 40829 | 48 | 0 | 16 | Low-quality | 17.48 |
| Sample_C5A_k141_265731            | 9383  | 4  | 0 | 1  | Low-quality | 17.48 |
| Sample_T2A_k141_66276             | 6668  | 6  | 1 | 1  | Low-quality | 17.47 |
| Sample_T13A_k141_27702            | 6646  | 10 | 3 | 0  | Low-quality | 17.47 |
| Sample_T14B_k141_124196           | 6226  | 9  | 2 | 0  | Low-quality | 17.47 |
| Sample_T8A_k141_228148            | 31804 | 24 | 2 | 6  | Low-quality | 17.47 |
| Sample_C10A_k141_292340           | 12731 | 8  | 0 | 1  | Low-quality | 17.46 |
| Sample_C13B_k141_55584            | 31297 | 35 | 1 | 7  | Low-quality | 17.46 |
| Sample_T12B_k141_147159           | 11966 | 12 | 0 | 1  | Low-quality | 17.46 |
| Sample_T14A_k141_171100           | 25492 | 18 | 1 | 9  | Low-quality | 17.46 |
| Sample_C4C_k141_59524             | 10335 | 15 | 3 | 0  | Low-quality | 17.46 |
| Sample_T15B_k141_91020            | 6748  | 10 | 0 | 3  | Low-quality | 17.45 |
| Sample_C10A_k141_288892           | 13250 | 13 | 2 | 1  | Low-quality | 17.45 |
| Sample_T4B_k141_203951_fragment_1 | 18388 | 15 | 0 | 5  | Low-quality | 17.45 |
| Sample_C1C_k141_98692             | 30445 | 24 | 0 | 21 | Low-quality | 17.44 |
| Sample_C3A_k141_226116            | 18265 | 33 | 6 | 0  | Low-quality | 17.44 |
| Sample_T7C_k141_94407             | 6707  | 4  | 4 | 0  | Low-quality | 17.44 |
| Sample_C4B_k141_171174            | 5841  | 9  | 1 | 4  | Low-quality | 17.43 |
| Sample_C10C_k141_82332            | 6387  | 9  | 2 | 0  | Low-quality | 17.43 |
| Sample_C8A_k141_27029             | 7616  | 19 | 2 | 1  | Low-quality | 17.43 |
| Sample_T12A_k141_270866           | 5785  | 8  | 1 | 0  | Low-quality | 17.43 |
| Sample_T2B_k141_204858            | 26162 | 45 | 7 | 2  | Low-quality | 17.42 |
| Sample_T11B_k141_51164            | 26905 | 29 | 1 | 11 | Low-quality | 17.41 |
| Sample_C14C_k141_46911            | 6889  | 8  | 1 | 0  | Low-quality | 17.41 |
| Sample_C9B_k141_66220             | 9523  | 12 | 1 | 1  | Low-quality | 17.41 |
| Sample_T17A_k141_39406            | 6038  | 5  | 4 | 0  | Low-quality | 17.41 |



|                                    |        |     |   |     |             |       |
|------------------------------------|--------|-----|---|-----|-------------|-------|
| Sample_T7C_k141_70745              | 7844   | 13  | 6 | 0   | Low-quality | 17.41 |
| Sample_C5C_k141_88862              | 6737   | 9   | 5 | 0   | Low-quality | 17.4  |
| Sample_T4B_k141_37283              | 6459   | 16  | 0 | 0   | Low-quality | 17.4  |
| Sample_T8B_k141_262111             | 5751   | 9   | 0 | 0   | Low-quality | 17.4  |
| Sample_C8B_k141_145894             | 13328  | 12  | 0 | 1   | Low-quality | 17.39 |
| Sample_C3A_k141_185485             | 7531   | 13  | 0 | 0   | Low-quality | 17.39 |
| Sample_T17A_k141_38990             | 6367   | 13  | 2 | 1   | Low-quality | 17.38 |
| Sample_C3B_k141_220662             | 10011  | 12  | 4 | 0   | Low-quality | 17.38 |
| Sample_C8C_k141_71817              | 15894  | 23  | 1 | 2   | Low-quality | 17.37 |
| Sample_T16A_k141_63354             | 8905   | 8   | 0 | 3   | Low-quality | 17.37 |
| Sample_T10A_k141_123720            | 5909   | 4   | 4 | 0   | Low-quality | 17.37 |
| Sample_T4A_k141_73459              | 10151  | 21  | 4 | 0   | Low-quality | 17.37 |
| Sample_T11C_k141_18613             | 7296   | 9   | 0 | 5   | Low-quality | 17.36 |
| Sample_C7B_k141_84511              | 6564   | 10  | 4 | 0   | Low-quality | 17.36 |
| Sample_T8C_k141_185659             | 11360  | 16  | 3 | 0   | Low-quality | 17.36 |
| Sample_T5C_k141_133675             | 7868   | 10  | 1 | 0   | Low-quality | 17.35 |
| Sample_T15B_k141_97490             | 9033   | 15  | 5 | 0   | Low-quality | 17.35 |
| Sample_C3A_k141_188621             | 6360   | 10  | 2 | 0   | Low-quality | 17.34 |
| Sample_T10A_k141_151204            | 22627  | 14  | 1 | 2   | Low-quality | 17.34 |
| Sample_T8C_k141_13188              | 6069   | 5   | 4 | 0   | Low-quality | 17.34 |
| Sample_C4A_k141_237449             | 15822  | 10  | 0 | 2   | Low-quality | 17.33 |
| Sample_C5A_k141_165909             | 14150  | 18  | 2 | 3   | Low-quality | 17.33 |
| Sample_T14B_k141_116267            | 18251  | 17  | 0 | 14  | Low-quality | 17.33 |
| Sample_T17C_k141_31240             | 7953   | 7   | 0 | 3   | Low-quality | 17.33 |
| Sample_C13A_k141_13276             | 5854   | 14  | 0 | 0   | Low-quality | 17.33 |
| Sample_T15B_k141_75942             | 15040  | 15  | 0 | 1   | Low-quality | 17.32 |
| Sample_C2A_k141_109122             | 10361  | 14  | 0 | 3   | Low-quality | 17.31 |
| Sample_T12A_k141_284391_fragment_1 | 7806   | 16  | 4 | 1   | Low-quality | 17.31 |
| Sample_C14B_k141_89000             | 21631  | 21  | 0 | 4   | Low-quality | 17.3  |
| Sample_C2C_k141_224914             | 205776 | 180 | 2 | 105 | Low-quality | 17.3  |
| Sample_C10C_k141_205096            | 7333   | 12  | 1 | 0   | Low-quality | 17.29 |
| Sample_T18B_k141_123031            | 10354  | 14  | 0 | 4   | Low-quality | 17.29 |
| Sample_C13B_k141_67427             | 16373  | 26  | 2 | 0   | Low-quality | 17.29 |
| Sample_C4B_k141_252323             | 8811   | 11  | 3 | 0   | Low-quality | 17.29 |
| Sample_C10C_k141_203359            | 10343  | 9   | 0 | 1   | Low-quality | 17.28 |
| Sample_T14B_k141_12461             | 45112  | 44  | 1 | 29  | Low-quality | 17.28 |
| Sample_C5A_k141_191010             | 18085  | 13  | 0 | 3   | Low-quality | 17.27 |
| Sample_T14B_k141_140127            | 7260   | 7   | 0 | 5   | Low-quality | 17.27 |
| Sample_T17B_k141_3740              | 14966  | 15  | 1 | 9   | Low-quality | 17.27 |

|                         |       |    |   |    |             |       |
|-------------------------|-------|----|---|----|-------------|-------|
| Sample_C3B_k141_114410  | 8556  | 20 | 3 | 0  | Low-quality | 17.27 |
| Sample_T4B_k141_105271  | 7028  | 12 | 5 | 0  | Low-quality | 17.27 |
| Sample_T6C_k141_32247   | 6572  | 8  | 3 | 0  | Low-quality | 17.27 |
| Sample_T10C_k141_51978  | 31823 | 31 | 1 | 8  | Low-quality | 17.26 |
| Sample_T6C_k141_80300   | 9769  | 10 | 2 | 1  | Low-quality | 17.26 |
| Sample_C5A_k141_30504   | 26660 | 26 | 1 | 7  | Low-quality | 17.25 |
| Sample_T6B_k141_176144  | 16929 | 14 | 0 | 3  | Low-quality | 17.25 |
| Sample_T7C_k141_107278  | 8019  | 7  | 0 | 2  | Low-quality | 17.25 |
| Sample_T8A_k141_256935  | 6836  | 5  | 5 | 0  | Low-quality | 17.25 |
| Sample_C11B_k141_34657  | 14275 | 15 | 2 | 2  | Low-quality | 17.24 |
| Sample_C7C_k141_46610   | 11392 | 9  | 1 | 0  | Low-quality | 17.24 |
| Sample_T3A_k141_15832   | 10665 | 14 | 0 | 4  | Low-quality | 17.24 |
| Sample_T8C_k141_28396   | 10631 | 16 | 4 | 2  | Low-quality | 17.24 |
| Sample_T10A_k141_44760  | 10310 | 16 | 0 | 2  | Low-quality | 17.22 |
| Sample_T2A_k141_103820  | 6946  | 7  | 6 | 0  | Low-quality | 17.22 |
| Sample_C11C_k141_115248 | 18994 | 24 | 0 | 7  | Low-quality | 17.21 |
| Sample_C11C_k141_44213  | 7906  | 8  | 0 | 3  | Low-quality | 17.21 |
| Sample_C4B_k141_28965   | 7708  | 7  | 0 | 4  | Low-quality | 17.2  |
| Sample_C9A_k141_37280   | 94196 | 80 | 1 | 51 | Low-quality | 17.2  |
| Sample_T2A_k141_17902   | 7120  | 11 | 2 | 1  | Low-quality | 17.2  |
| Sample_C2C_k141_237735  | 14437 | 18 | 1 | 6  | Low-quality | 17.19 |
| Sample_T6A_k141_177560  | 7255  | 19 | 2 | 0  | Low-quality | 17.19 |
| Sample_T14B_k141_129649 | 7339  | 11 | 1 | 0  | Low-quality | 17.18 |
| Sample_T8C_k141_135062  | 6444  | 10 | 1 | 0  | Low-quality | 17.18 |
| Sample_C1C_k141_98097   | 26673 | 19 | 1 | 16 | Low-quality | 17.17 |
| Sample_T8B_k141_199371  | 8728  | 10 | 1 | 0  | Low-quality | 17.17 |
| Sample_C10C_k141_9321   | 7080  | 8  | 3 | 0  | Low-quality | 17.17 |
| Sample_C4B_k141_254199  | 6016  | 11 | 4 | 0  | Low-quality | 17.17 |
| Sample_T10A_k141_138058 | 6768  | 20 | 2 | 0  | Low-quality | 17.17 |
| Sample_T12A_k141_34759  | 6042  | 9  | 1 | 0  | Low-quality | 17.17 |
| Sample_T12B_k141_9179   | 6635  | 5  | 0 | 1  | Low-quality | 17.16 |
| Sample_T13A_k141_105153 | 9095  | 14 | 2 | 0  | Low-quality | 17.16 |
| Sample_T4B_k141_151095  | 6855  | 10 | 3 | 0  | Low-quality | 17.16 |
| Sample_T6A_k141_104253  | 8476  | 17 | 1 | 0  | Low-quality | 17.16 |
| Sample_C11C_k141_105022 | 6336  | 6  | 0 | 0  | Low-quality | 17.15 |
| Sample_C5A_k141_87830   | 41655 | 40 | 1 | 12 | Low-quality | 17.15 |
| Sample_T10B_k141_158441 | 7753  | 9  | 8 | 0  | Low-quality | 17.15 |
| Sample_T12A_k141_58449  | 9363  | 10 | 1 | 0  | Low-quality | 17.15 |
| Sample_T2A_k141_42357   | 16624 | 12 | 0 | 2  | Low-quality | 17.14 |

|                                    |       |    |   |    |             |       |
|------------------------------------|-------|----|---|----|-------------|-------|
| Sample_C2B_k141_312599             | 18041 | 12 | 0 | 11 | Low-quality | 17.13 |
| Sample_C8A_k141_111527             | 18806 | 17 | 1 | 4  | Low-quality | 17.13 |
| Sample_T18A_k141_190423            | 9357  | 12 | 9 | 1  | Low-quality | 17.13 |
| Sample_T15B_k141_115152            | 8529  | 13 | 7 | 0  | Low-quality | 17.13 |
| Sample_C10C_k141_185792            | 7173  | 9  | 1 | 0  | Low-quality | 17.11 |
| Sample_C5A_k141_18945              | 8038  | 9  | 5 | 0  | Low-quality | 17.11 |
| Sample_T12A_k141_319127_fragment_2 | 6049  | 9  | 2 | 1  | Low-quality | 17.11 |
| Sample_T17C_k141_10423             | 12868 | 10 | 0 | 2  | Low-quality | 17.11 |
| Sample_C10B_k141_132001            | 11300 | 16 | 1 | 4  | Low-quality | 17.1  |
| Sample_C11C_k141_39559             | 8052  | 10 | 4 | 0  | Low-quality | 17.1  |
| Sample_C10C_k141_59813             | 6078  | 7  | 4 | 0  | Low-quality | 17.09 |
| Sample_C14A_k141_155993            | 5795  | 8  | 5 | 0  | Low-quality | 17.09 |
| Sample_T10C_k141_44274             | 22888 | 55 | 4 | 0  | Low-quality | 17.09 |
| Sample_T4A_k141_99845              | 6409  | 17 | 0 | 0  | Low-quality | 17.09 |
| Sample_C4A_k141_5475_fragment_2    | 7654  | 9  | 1 | 2  | Low-quality | 17.08 |
| Sample_C8C_k141_1205               | 12200 | 12 | 1 | 1  | Low-quality | 17.08 |
| Sample_C8C_k141_109540             | 7147  | 3  | 0 | 1  | Low-quality | 17.07 |
| Sample_C10B_k141_3691              | 26590 | 38 | 8 | 2  | Low-quality | 17.06 |
| Sample_T10A_k141_105803            | 6575  | 15 | 8 | 0  | Low-quality | 17.06 |
| Sample_T18C_k141_66346             | 31443 | 34 | 1 | 8  | Low-quality | 17.05 |
| Sample_C6A_k141_88842              | 6386  | 8  | 3 | 0  | Low-quality | 17.05 |
| Sample_C7B_k141_171669             | 6206  | 10 | 7 | 0  | Low-quality | 17.05 |
| Sample_T17C_k141_11498             | 5859  | 8  | 3 | 0  | Low-quality | 17.05 |
| Sample_T13C_k141_118335            | 10798 | 7  | 0 | 2  | Low-quality | 17.04 |
| Sample_T14B_k141_157294            | 6560  | 5  | 0 | 1  | Low-quality | 17.04 |
| Sample_C4B_k141_215184             | 17835 | 15 | 0 | 12 | Low-quality | 17.03 |
| Sample_T13A_k141_26599             | 19403 | 19 | 1 | 5  | Low-quality | 17.03 |
| Sample_T16C_k141_65323             | 10171 | 10 | 6 | 0  | Low-quality | 17.03 |
| Sample_C1B_k141_184696             | 11249 | 13 | 1 | 1  | Low-quality | 17.02 |
| Sample_T2B_k141_170925             | 55550 | 56 | 2 | 30 | Low-quality | 17.02 |
| Sample_T10A_k141_82739             | 7081  | 9  | 2 | 0  | Low-quality | 17.02 |
| Sample_C12B_k141_11493             | 31364 | 35 | 1 | 5  | Low-quality | 17.01 |
| Sample_C14A_k141_71153             | 24268 | 37 | 7 | 0  | Low-quality | 17.01 |
| Sample_C4B_k141_147956             | 6821  | 8  | 4 | 0  | Low-quality | 17.01 |
| Sample_C12A_k141_63768             | 5382  | 6  | 1 | 0  | Low-quality | 17    |
| Sample_C12B_k141_174630            | 5901  | 6  | 3 | 0  | Low-quality | 17    |
| Sample_T15A_k141_6098              | 25280 | 27 | 1 | 6  | Low-quality | 16.99 |
| Sample_C4B_k141_21846              | 6792  | 16 | 2 | 2  | Low-quality | 16.99 |
| Sample_T18C_k141_66724             | 5810  | 18 | 1 | 0  | Low-quality | 16.99 |

|                                  |       |    |    |    |             |       |
|----------------------------------|-------|----|----|----|-------------|-------|
| Sample_C14C_k141_81185           | 8773  | 7  | 6  | 0  | Low-quality | 16.98 |
| Sample_T4C_k141_74358            | 6276  | 4  | 3  | 0  | Low-quality | 16.98 |
| Sample_C1B_k141_568              | 14182 | 12 | 0  | 9  | Low-quality | 16.97 |
| Sample_T13C_k141_145307          | 13969 | 12 | 0  | 0  | Low-quality | 16.97 |
| Sample_C3B_k141_185278           | 7508  | 7  | 0  | 0  | Low-quality | 16.97 |
| Sample_T5B_k141_69178            | 10986 | 13 | 6  | 2  | Low-quality | 16.97 |
| Sample_C14C_k141_38886           | 27034 | 29 | 1  | 8  | Low-quality | 16.96 |
| Sample_T15C_k141_62908           | 36758 | 34 | 0  | 6  | Low-quality | 16.96 |
| Sample_C1B_k141_63991            | 6908  | 14 | 4  | 0  | Low-quality | 16.96 |
| Sample_T2A_k141_63362            | 6493  | 6  | 0  | 6  | Low-quality | 16.95 |
| Sample_T8B_k141_22305_fragment_1 | 13953 | 16 | 3  | 0  | Low-quality | 16.95 |
| Sample_C13B_k141_30164           | 13634 | 17 | 2  | 2  | Low-quality | 16.94 |
| Sample_C6B_k141_137707           | 10036 | 12 | 1  | 1  | Low-quality | 16.94 |
| Sample_T2B_k141_175989           | 14660 | 12 | 0  | 3  | Low-quality | 16.94 |
| Sample_C10C_k141_103111          | 9473  | 21 | 1  | 2  | Low-quality | 16.94 |
| Sample_C8C_k141_83002            | 16945 | 15 | 1  | 3  | Low-quality | 16.93 |
| Sample_C8B_k141_64906            | 6094  | 9  | 8  | 0  | Low-quality | 16.93 |
| Sample_C8C_k141_123419           | 7713  | 7  | 2  | 0  | Low-quality | 16.93 |
| Sample_C2A_k141_173436           | 8681  | 5  | 0  | 3  | Low-quality | 16.92 |
| Sample_C9B_k141_25102            | 18234 | 20 | 0  | 6  | Low-quality | 16.92 |
| Sample_T5B_k141_6145             | 16563 | 14 | 0  | 3  | Low-quality | 16.92 |
| Sample_C10C_k141_12952           | 10272 | 22 | 0  | 0  | Low-quality | 16.92 |
| Sample_T16B_k141_131139          | 6353  | 6  | 1  | 0  | Low-quality | 16.92 |
| Sample_T17B_k141_3920            | 5719  | 8  | 8  | 0  | Low-quality | 16.92 |
| Sample_T8C_k141_23475            | 10130 | 15 | 11 | 0  | Low-quality | 16.92 |
| Sample_C8B_k141_4056             | 10126 | 10 | 0  | 4  | Low-quality | 16.91 |
| Sample_C2C_k141_261419           | 92035 | 96 | 1  | 65 | Low-quality | 16.89 |
| Sample_C6B_k141_38222            | 9918  | 13 | 0  | 4  | Low-quality | 16.89 |
| Sample_T6A_k141_251962           | 12740 | 13 | 2  | 3  | Low-quality | 16.89 |
| Sample_C10A_k141_176086          | 6440  | 15 | 1  | 0  | Low-quality | 16.89 |
| Sample_C10A_k141_107200          | 6908  | 18 | 2  | 0  | Low-quality | 16.89 |
| Sample_C3A_k141_158658           | 5583  | 8  | 3  | 0  | Low-quality | 16.89 |
| Sample_C6C_k141_220214           | 7483  | 8  | 2  | 0  | Low-quality | 16.89 |
| Sample_T10A_k141_173583          | 6088  | 8  | 5  | 0  | Low-quality | 16.89 |
| Sample_C11C_k141_183937          | 8070  | 12 | 1  | 0  | Low-quality | 16.88 |
| Sample_T8A_k141_22071            | 10231 | 18 | 4  | 3  | Low-quality | 16.88 |
| Sample_T14A_k141_35856           | 28195 | 40 | 2  | 0  | Low-quality | 16.87 |
| Sample_C10A_k141_15227           | 7708  | 10 | 4  | 0  | Low-quality | 16.87 |
| Sample_T15A_k141_26025           | 11146 | 14 | 1  | 1  | Low-quality | 16.87 |

|                                   |       |    |   |    |             |       |
|-----------------------------------|-------|----|---|----|-------------|-------|
| Sample_T6A_k141_25635             | 11152 | 12 | 1 | 1  | Low-quality | 16.87 |
| Sample_T8B_k141_225604            | 6997  | 9  | 4 | 0  | Low-quality | 16.87 |
| Sample_T6A_k141_49040             | 9388  | 7  | 0 | 5  | Low-quality | 16.86 |
| Sample_T8A_k141_133350            | 18325 | 24 | 0 | 6  | Low-quality | 16.86 |
| Sample_C2B_k141_111370            | 7074  | 8  | 1 | 0  | Low-quality | 16.86 |
| Sample_C14B_k141_33535            | 20559 | 20 | 1 | 13 | Low-quality | 16.85 |
| Sample_T4B_k141_40202             | 35038 | 28 | 0 | 21 | Low-quality | 16.85 |
| Sample_T2A_k141_93136             | 6116  | 10 | 1 | 0  | Low-quality | 16.85 |
| Sample_C8A_k141_20619             | 7074  | 13 | 2 | 0  | Low-quality | 16.84 |
| Sample_C13C_k141_78326            | 5692  | 8  | 6 | 0  | Low-quality | 16.84 |
| Sample_C4C_k141_70296             | 7984  | 9  | 2 | 0  | Low-quality | 16.82 |
| Sample_T12B_k141_50416            | 15135 | 9  | 0 | 1  | Low-quality | 16.82 |
| Sample_C13C_k141_34250            | 9729  | 9  | 1 | 1  | Low-quality | 16.81 |
| Sample_C2A_k141_44214             | 13548 | 23 | 7 | 1  | Low-quality | 16.81 |
| Sample_C6B_k141_10040             | 6872  | 10 | 6 | 0  | Low-quality | 16.8  |
| Sample_C6C_k141_151481            | 5764  | 9  | 6 | 0  | Low-quality | 16.8  |
| Sample_C11B_k141_245701           | 9675  | 8  | 0 | 1  | Low-quality | 16.79 |
| Sample_T14A_k141_32934            | 13210 | 4  | 2 | 1  | Low-quality | 16.79 |
| Sample_C10A_k141_168229           | 6586  | 8  | 1 | 0  | Low-quality | 16.79 |
| Sample_T8C_k141_66841_fragment_2  | 18602 | 20 | 1 | 3  | Low-quality | 16.79 |
| Sample_C3A_k141_153346            | 6288  | 8  | 2 | 0  | Low-quality | 16.78 |
| Sample_T11B_k141_69093            | 6277  | 11 | 2 | 1  | Low-quality | 16.78 |
| Sample_T13B_k141_53437            | 15849 | 20 | 7 | 2  | Low-quality | 16.78 |
| Sample_C11A_k141_75900            | 12834 | 25 | 7 | 0  | Low-quality | 16.77 |
| Sample_T2C_k141_110131_fragment_3 | 11479 | 18 | 3 | 3  | Low-quality | 16.77 |
| Sample_T5A_k141_16270             | 26465 | 35 | 1 | 3  | Low-quality | 16.77 |
| Sample_T1A_k141_31478             | 10917 | 11 | 0 | 3  | Low-quality | 16.76 |
| Sample_T14C_k141_61904            | 7598  | 12 | 1 | 0  | Low-quality | 16.75 |
| Sample_T2B_k141_69144             | 6487  | 5  | 0 | 1  | Low-quality | 16.75 |
| Sample_T7A_k141_9149              | 62482 | 81 | 2 | 36 | Low-quality | 16.75 |
| Sample_C4B_k141_213381            | 7566  | 11 | 0 | 1  | Low-quality | 16.75 |
| Sample_T13B_k141_180753           | 6603  | 12 | 6 | 0  | Low-quality | 16.75 |
| Sample_T7A_k141_205337            | 7024  | 8  | 7 | 0  | Low-quality | 16.75 |
| Sample_T7C_k141_30451             | 9998  | 16 | 3 | 0  | Low-quality | 16.75 |
| Sample_C1A_k141_185505            | 8167  | 13 | 1 | 0  | Low-quality | 16.74 |
| Sample_T11B_k141_6794             | 13783 | 18 | 0 | 1  | Low-quality | 16.74 |
| Sample_C10A_k141_87025_fragment_1 | 8316  | 16 | 3 | 0  | Low-quality | 16.74 |
| Sample_C6A_k141_173314            | 8955  | 12 | 4 | 0  | Low-quality | 16.73 |
| Sample_T15B_k141_92917            | 7051  | 13 | 2 | 0  | Low-quality | 16.73 |

|                         |       |    |    |    |             |       |
|-------------------------|-------|----|----|----|-------------|-------|
| Sample_T4A_k141_50160   | 8809  | 11 | 6  | 1  | Low-quality | 16.73 |
| Sample_T8B_k141_237826  | 6291  | 11 | 5  | 0  | Low-quality | 16.73 |
| Sample_T14B_k141_62348  | 6715  | 6  | 0  | 2  | Low-quality | 16.72 |
| Sample_C10A_k141_33124  | 6842  | 14 | 2  | 0  | Low-quality | 16.72 |
| Sample_T10B_k141_1703   | 10031 | 18 | 2  | 0  | Low-quality | 16.72 |
| Sample_C10C_k141_40639  | 8890  | 7  | 0  | 2  | Low-quality | 16.71 |
| Sample_T14C_k141_40561  | 7151  | 7  | 0  | 3  | Low-quality | 16.71 |
| Sample_T18B_k141_112907 | 18850 | 14 | 0  | 6  | Low-quality | 16.71 |
| Sample_C8C_k141_152233  | 15683 | 19 | 0  | 0  | Low-quality | 16.71 |
| Sample_T6C_k141_79390   | 16032 | 33 | 3  | 0  | Low-quality | 16.71 |
| Sample_C10A_k141_328877 | 9227  | 10 | 0  | 3  | Low-quality | 16.7  |
| Sample_C13B_k141_65269  | 8867  | 11 | 0  | 4  | Low-quality | 16.7  |
| Sample_C14C_k141_32320  | 7481  | 4  | 0  | 4  | Low-quality | 16.7  |
| Sample_C3C_k141_58497   | 11035 | 12 | 1  | 3  | Low-quality | 16.7  |
| Sample_T10A_k141_10271  | 5686  | 19 | 2  | 0  | Low-quality | 16.7  |
| Sample_T4A_k141_75159   | 11776 | 15 | 5  | 0  | Low-quality | 16.7  |
| Sample_C2A_k141_36585   | 8570  | 9  | 0  | 2  | Low-quality | 16.69 |
| Sample_C7B_k141_93291   | 28828 | 33 | 1  | 18 | Low-quality | 16.69 |
| Sample_C9A_k141_106366  | 11481 | 14 | 2  | 2  | Low-quality | 16.69 |
| Sample_T8C_k141_100517  | 15021 | 13 | 0  | 1  | Low-quality | 16.69 |
| Sample_C3A_k141_52154   | 8677  | 14 | 0  | 0  | Low-quality | 16.69 |
| Sample_T10A_k141_116234 | 6918  | 14 | 7  | 0  | Low-quality | 16.69 |
| Sample_T12B_k141_149857 | 10053 | 21 | 5  | 1  | Low-quality | 16.69 |
| Sample_C11B_k141_26972  | 7838  | 14 | 2  | 0  | Low-quality | 16.68 |
| Sample_T12A_k141_140120 | 6802  | 8  | 0  | 1  | Low-quality | 16.68 |
| Sample_T8C_k141_34260   | 8268  | 12 | 9  | 0  | Low-quality | 16.68 |
| Sample_C13B_k141_5908   | 5502  | 4  | 0  | 0  | Low-quality | 16.67 |
| Sample_C5A_k141_158866  | 7562  | 5  | 2  | 0  | Low-quality | 16.67 |
| Sample_T16A_k141_99132  | 9408  | 14 | 1  | 1  | Low-quality | 16.67 |
| Sample_C5A_k141_225722  | 6731  | 11 | 4  | 0  | Low-quality | 16.66 |
| Sample_T12A_k141_148303 | 6865  | 14 | 1  | 0  | Low-quality | 16.66 |
| Sample_T18A_k141_196597 | 7746  | 13 | 6  | 0  | Low-quality | 16.66 |
| Sample_C2B_k141_258176  | 6354  | 9  | 2  | 0  | Low-quality | 16.65 |
| Sample_T17B_k141_18732  | 6534  | 9  | 7  | 0  | Low-quality | 16.65 |
| Sample_C2A_k141_78255   | 14108 | 15 | 1  | 7  | Low-quality | 16.64 |
| Sample_T1A_k141_13705   | 7720  | 15 | 11 | 0  | Low-quality | 16.64 |
| Sample_T5A_k141_5385    | 7270  | 12 | 5  | 0  | Low-quality | 16.64 |
| Sample_T14A_k141_31509  | 13691 | 13 | 0  | 1  | Low-quality | 16.63 |
| Sample_T7C_k141_103207  | 7349  | 5  | 0  | 1  | Low-quality | 16.63 |

|                                   |       |    |    |   |             |       |
|-----------------------------------|-------|----|----|---|-------------|-------|
| Sample_T13A_k141_98514            | 6249  | 11 | 0  | 0 | Low-quality | 16.63 |
| Sample_C2C_k141_64883             | 6815  | 4  | 0  | 1 | Low-quality | 16.62 |
| Sample_C3A_k141_227699            | 9859  | 12 | 0  | 4 | Low-quality | 16.62 |
| Sample_T13A_k141_35010            | 10975 | 17 | 1  | 3 | Low-quality | 16.61 |
| Sample_T7C_k141_147584            | 13233 | 27 | 2  | 0 | Low-quality | 16.61 |
| Sample_C2C_k141_140964            | 6808  | 11 | 2  | 0 | Low-quality | 16.6  |
| Sample_T2A_k141_29006             | 6721  | 8  | 2  | 0 | Low-quality | 16.6  |
| Sample_T3B_k141_34064             | 27385 | 38 | 17 | 0 | Low-quality | 16.6  |
| Sample_T8C_k141_10965             | 5627  | 15 | 0  | 0 | Low-quality | 16.6  |
| Sample_C6B_k141_40491             | 9935  | 8  | 0  | 1 | Low-quality | 16.59 |
| Sample_T8A_k141_245363            | 5960  | 4  | 0  | 4 | Low-quality | 16.59 |
| Sample_C5C_k141_63562             | 7237  | 8  | 6  | 0 | Low-quality | 16.59 |
| Sample_T18B_k141_21957            | 9853  | 14 | 6  | 0 | Low-quality | 16.59 |
| Sample_C3C_k141_256176            | 14351 | 12 | 1  | 2 | Low-quality | 16.58 |
| Sample_T11C_k141_91353            | 8388  | 11 | 0  | 1 | Low-quality | 16.58 |
| Sample_C10A_k141_330508           | 6212  | 12 | 0  | 1 | Low-quality | 16.58 |
| Sample_C13B_k141_17366_fragment_1 | 7757  | 15 | 1  | 0 | Low-quality | 16.58 |
| Sample_C8B_k141_155031            | 6351  | 9  | 7  | 0 | Low-quality | 16.58 |
| Sample_T15B_k141_61926_fragment_1 | 18791 | 19 | 2  | 3 | Low-quality | 16.58 |
| Sample_C11C_k141_37202            | 33230 | 74 | 10 | 1 | Low-quality | 16.57 |
| Sample_C10A_k141_233233           | 6083  | 8  | 4  | 0 | Low-quality | 16.57 |
| Sample_C9C_k141_68049             | 5844  | 11 | 9  | 0 | Low-quality | 16.57 |
| Sample_T14A_k141_184251           | 24602 | 46 | 5  | 2 | Low-quality | 16.57 |
| Sample_T18A_k141_103607           | 14561 | 14 | 6  | 0 | Low-quality | 16.57 |
| Sample_C14A_k141_81290            | 24397 | 41 | 3  | 2 | Low-quality | 16.56 |
| Sample_C14A_k141_145238           | 6033  | 13 | 5  | 0 | Low-quality | 16.56 |
| Sample_C4B_k141_64489             | 6553  | 12 | 2  | 1 | Low-quality | 16.56 |
| Sample_T14B_k141_15911            | 6412  | 10 | 7  | 0 | Low-quality | 16.56 |
| Sample_C5A_k141_216443            | 8730  | 10 | 1  | 1 | Low-quality | 16.55 |
| Sample_C11B_k141_14247            | 9624  | 11 | 1  | 5 | Low-quality | 16.52 |
| Sample_T12B_k141_24838            | 11006 | 19 | 0  | 3 | Low-quality | 16.52 |
| Sample_T3C_k141_115172            | 8245  | 10 | 1  | 6 | Low-quality | 16.52 |
| Sample_C8A_k141_1197              | 9498  | 14 | 9  | 0 | Low-quality | 16.52 |
| Sample_T8A_k141_87606             | 15408 | 12 | 0  | 0 | Low-quality | 16.51 |
| Sample_C14B_k141_34360            | 6281  | 13 | 4  | 0 | Low-quality | 16.51 |
| Sample_C4B_k141_51669             | 23236 | 34 | 4  | 0 | Low-quality | 16.51 |
| Sample_C14A_k141_27476            | 5605  | 5  | 5  | 0 | Low-quality | 16.5  |
| Sample_T11B_k141_50942            | 26052 | 32 | 1  | 3 | Low-quality | 16.5  |
| Sample_T13B_k141_143310           | 7389  | 11 | 7  | 0 | Low-quality | 16.5  |

|                                    |       |    |    |   |             |       |
|------------------------------------|-------|----|----|---|-------------|-------|
| Sample_T12A_k141_56953             | 6797  | 4  | 2  | 0 | Low-quality | 16.49 |
| Sample_C11B_k141_11972             | 7125  | 19 | 4  | 0 | Low-quality | 16.48 |
| Sample_C14A_k141_38367             | 6533  | 7  | 1  | 0 | Low-quality | 16.48 |
| Sample_T13B_k141_176427            | 6189  | 11 | 1  | 0 | Low-quality | 16.48 |
| Sample_T17B_k141_25850             | 7207  | 12 | 5  | 0 | Low-quality | 16.48 |
| Sample_C11A_k141_119483            | 9669  | 21 | 2  | 3 | Low-quality | 16.47 |
| Sample_C13A_k141_91243_fragment_1  | 11010 | 14 | 1  | 0 | Low-quality | 16.47 |
| Sample_C14B_k141_82445             | 6906  | 8  | 4  | 0 | Low-quality | 16.47 |
| Sample_C2A_k141_132817             | 6164  | 8  | 0  | 0 | Low-quality | 16.47 |
| Sample_T11A_k141_97427             | 10200 | 7  | 2  | 0 | Low-quality | 16.47 |
| Sample_T13A_k141_47800             | 7362  | 8  | 3  | 0 | Low-quality | 16.47 |
| Sample_T12C_k141_120514            | 10369 | 1  | 1  | 0 | Low-quality | 16.46 |
| Sample_T15C_k141_124546            | 14814 | 12 | 0  | 1 | Low-quality | 16.46 |
| Sample_T10B_k141_71711             | 21783 | 49 | 3  | 0 | Low-quality | 16.46 |
| Sample_T12C_k141_68792             | 24833 | 35 | 4  | 0 | Low-quality | 16.46 |
| Sample_T16B_k141_75129             | 8726  | 16 | 13 | 0 | Low-quality | 16.46 |
| Sample_C13B_k141_13872             | 8313  | 7  | 0  | 1 | Low-quality | 16.45 |
| Sample_T12A_k141_3003_fragment_1   | 6183  | 14 | 1  | 0 | Low-quality | 16.45 |
| Sample_T8C_k141_113929             | 5801  | 9  | 7  | 0 | Low-quality | 16.45 |
| Sample_T16A_k141_26388             | 13343 | 19 | 1  | 2 | Low-quality | 16.44 |
| Sample_C12A_k141_56966             | 6270  | 14 | 12 | 0 | Low-quality | 16.44 |
| Sample_C13A_k141_110265            | 5876  | 8  | 1  | 0 | Low-quality | 16.44 |
| Sample_C3A_k141_191943             | 8626  | 14 | 6  | 0 | Low-quality | 16.44 |
| Sample_T10A_k141_169953            | 6373  | 7  | 7  | 0 | Low-quality | 16.44 |
| Sample_C11C_k141_103975_fragment_1 | 6529  | 13 | 1  | 0 | Low-quality | 16.43 |
| Sample_C5A_k141_249824             | 6592  | 10 | 1  | 0 | Low-quality | 16.43 |
| Sample_T11A_k141_55543             | 13275 | 19 | 1  | 2 | Low-quality | 16.43 |
| Sample_T15C_k141_103898            | 9475  | 17 | 4  | 0 | Low-quality | 16.43 |
| Sample_C2A_k141_204374             | 13418 | 12 | 0  | 3 | Low-quality | 16.42 |
| Sample_C5A_k141_267483             | 17911 | 15 | 5  | 3 | Low-quality | 16.42 |
| Sample_C6B_k141_56575_fragment_5   | 8341  | 9  | 0  | 1 | Low-quality | 16.42 |
| Sample_C13A_k141_73892             | 6200  | 3  | 0  | 0 | Low-quality | 16.41 |
| Sample_C5A_k141_144326             | 7529  | 8  | 0  | 3 | Low-quality | 16.41 |
| Sample_T10A_k141_123434            | 6073  | 4  | 0  | 1 | Low-quality | 16.41 |
| Sample_T17B_k141_8563              | 9823  | 14 | 0  | 0 | Low-quality | 16.41 |
| Sample_C11A_k141_6135              | 9188  | 16 | 3  | 0 | Low-quality | 16.41 |
| Sample_C7A_k141_151597             | 8532  | 10 | 3  | 1 | Low-quality | 16.41 |
| Sample_T18B_k141_122173            | 8177  | 5  | 0  | 3 | Low-quality | 16.4  |
| Sample_T6C_k141_193359             | 7196  | 13 | 3  | 0 | Low-quality | 16.4  |



|                                    |       |    |    |    |             |       |
|------------------------------------|-------|----|----|----|-------------|-------|
| Sample_C4A_k141_92980              | 17414 | 24 | 3  | 1  | Low-quality | 16.39 |
| Sample_C10B_k141_122599            | 6063  | 15 | 4  | 0  | Low-quality | 16.39 |
| Sample_C10C_k141_208821_fragment_1 | 9308  | 12 | 1  | 1  | Low-quality | 16.39 |
| Sample_C2C_k141_116602             | 17679 | 14 | 0  | 4  | Low-quality | 16.38 |
| Sample_C5A_k141_195524             | 13294 | 18 | 1  | 1  | Low-quality | 16.38 |
| Sample_T7A_k141_18054              | 5861  | 10 | 1  | 0  | Low-quality | 16.38 |
| Sample_C12A_k141_17790             | 5184  | 8  | 1  | 0  | Low-quality | 16.38 |
| Sample_C6A_k141_49942_fragment_4   | 11239 | 15 | 1  | 3  | Low-quality | 16.38 |
| Sample_T16C_k141_30205             | 6648  | 12 | 4  | 1  | Low-quality | 16.38 |
| Sample_C2C_k141_196939             | 25169 | 21 | 0  | 9  | Low-quality | 16.37 |
| Sample_C10C_k141_212554            | 9552  | 20 | 8  | 0  | Low-quality | 16.37 |
| Sample_C2B_k141_319578             | 6529  | 9  | 5  | 0  | Low-quality | 16.37 |
| Sample_C12C_k141_191523            | 8088  | 8  | 0  | 0  | Low-quality | 16.36 |
| Sample_C4A_k141_17020              | 23878 | 18 | 3  | 0  | Low-quality | 16.36 |
| Sample_C4C_k141_226214             | 11240 | 17 | 1  | 0  | Low-quality | 16.36 |
| Sample_T6C_k141_166236_fragment_1  | 7691  | 11 | 2  | 1  | Low-quality | 16.36 |
| Sample_C10C_k141_163401            | 9786  | 14 | 0  | 5  | Low-quality | 16.35 |
| Sample_C2B_k141_266641             | 30148 | 32 | 1  | 13 | Low-quality | 16.35 |
| Sample_T6C_k141_128691             | 25512 | 23 | 1  | 13 | Low-quality | 16.35 |
| Sample_T12B_k141_56579             | 6505  | 8  | 1  | 0  | Low-quality | 16.35 |
| Sample_T2A_k141_102356             | 10807 | 14 | 1  | 0  | Low-quality | 16.35 |
| Sample_C8C_k141_90659              | 15512 | 15 | 1  | 6  | Low-quality | 16.34 |
| Sample_C9B_k141_1765               | 13073 | 11 | 0  | 5  | Low-quality | 16.34 |
| Sample_T2C_k141_257876             | 16651 | 13 | 0  | 9  | Low-quality | 16.34 |
| Sample_C10C_k141_229824_fragment_1 | 7378  | 10 | 9  | 0  | Low-quality | 16.34 |
| Sample_C1B_k141_248498             | 10745 | 19 | 0  | 1  | Low-quality | 16.34 |
| Sample_C2B_k141_244083             | 6039  | 15 | 6  | 0  | Low-quality | 16.34 |
| Sample_T14A_k141_226585            | 10268 | 10 | 4  | 0  | Low-quality | 16.34 |
| Sample_C10C_k141_125667            | 5968  | 12 | 0  | 1  | Low-quality | 16.33 |
| Sample_C9B_k141_71906              | 8316  | 13 | 7  | 4  | Low-quality | 16.33 |
| Sample_C12C_k141_194300            | 7688  | 11 | 8  | 0  | Low-quality | 16.33 |
| Sample_C14A_k141_149550            | 7541  | 9  | 3  | 1  | Low-quality | 16.33 |
| Sample_T13C_k141_59021             | 9014  | 14 | 0  | 2  | Low-quality | 16.32 |
| Sample_C4B_k141_26717              | 6419  | 13 | 1  | 0  | Low-quality | 16.32 |
| Sample_C8A_k141_40697_fragment_1   | 8931  | 18 | 13 | 0  | Low-quality | 16.32 |
| Sample_T10A_k141_159915            | 6631  | 14 | 2  | 1  | Low-quality | 16.32 |
| Sample_T4B_k141_108898             | 17773 | 33 | 0  | 1  | Low-quality | 16.32 |
| Sample_C10C_k141_30566             | 25339 | 28 | 1  | 18 | Low-quality | 16.31 |
| Sample_T16C_k141_44967             | 6853  | 6  | 0  | 5  | Low-quality | 16.31 |

|                                   |       |    |   |   |             |       |
|-----------------------------------|-------|----|---|---|-------------|-------|
| Sample_C14C_k141_134749           | 6284  | 10 | 1 | 0 | Low-quality | 16.31 |
| Sample_C4B_k141_247211            | 9683  | 18 | 3 | 1 | Low-quality | 16.31 |
| Sample_T13B_k141_25369            | 5953  | 6  | 2 | 0 | Low-quality | 16.31 |
| Sample_T2B_k141_18786             | 8945  | 12 | 5 | 0 | Low-quality | 16.31 |
| Sample_C7A_k141_87654             | 22737 | 31 | 2 | 0 | Low-quality | 16.3  |
| Sample_T16B_k141_69078            | 5382  | 5  | 0 | 1 | Low-quality | 16.3  |
| Sample_C12B_k141_136872           | 8859  | 12 | 0 | 0 | Low-quality | 16.3  |
| Sample_C12C_k141_80043            | 6859  | 11 | 4 | 0 | Low-quality | 16.3  |
| Sample_T2B_k141_2841              | 22699 | 19 | 3 | 0 | Low-quality | 16.3  |
| Sample_T8B_k141_280043            | 5722  | 7  | 0 | 0 | Low-quality | 16.3  |
| Sample_T10A_k141_151650           | 8162  | 12 | 1 | 0 | Low-quality | 16.29 |
| Sample_T1C_k141_41187             | 6846  | 7  | 0 | 5 | Low-quality | 16.29 |
| Sample_C11C_k141_56981            | 7529  | 13 | 3 | 0 | Low-quality | 16.29 |
| Sample_C7A_k141_64610             | 21717 | 27 | 6 | 1 | Low-quality | 16.29 |
| Sample_T16B_k141_165054           | 7590  | 17 | 5 | 0 | Low-quality | 16.29 |
| Sample_C7A_k141_45557             | 9077  | 5  | 0 | 1 | Low-quality | 16.28 |
| Sample_C2C_k141_302200            | 10753 | 16 | 1 | 1 | Low-quality | 16.27 |
| Sample_C4B_k141_53448             | 9740  | 16 | 0 | 7 | Low-quality | 16.27 |
| Sample_T10A_k141_65560            | 7655  | 9  | 1 | 0 | Low-quality | 16.27 |
| Sample_C14A_k141_105462           | 6648  | 17 | 3 | 0 | Low-quality | 16.27 |
| Sample_C1B_k141_29721             | 15054 | 24 | 2 | 0 | Low-quality | 16.27 |
| Sample_T16A_k141_59913            | 5781  | 7  | 5 | 0 | Low-quality | 16.27 |
| Sample_C3A_k141_152011            | 7369  | 10 | 2 | 0 | Low-quality | 16.25 |
| Sample_C3A_k141_243496_fragment_1 | 7656  | 13 | 0 | 0 | Low-quality | 16.25 |
| Sample_T13B_k141_140401           | 7541  | 7  | 3 | 0 | Low-quality | 16.25 |
| Sample_T5C_k141_73538             | 14049 | 21 | 1 | 8 | Low-quality | 16.24 |
| Sample_C8B_k141_36091             | 6837  | 6  | 0 | 0 | Low-quality | 16.24 |
| Sample_C9C_k141_6119              | 5989  | 9  | 2 | 0 | Low-quality | 16.24 |
| Sample_T10C_k141_74119_fragment_2 | 14057 | 9  | 1 | 0 | Low-quality | 16.24 |
| Sample_T12A_k141_176828           | 15273 | 20 | 6 | 1 | Low-quality | 16.24 |
| Sample_T13A_k141_97868            | 6317  | 22 | 2 | 0 | Low-quality | 16.24 |
| Sample_T13B_k141_34680            | 6103  | 14 | 3 | 1 | Low-quality | 16.24 |
| Sample_T2C_k141_146316            | 25739 | 48 | 7 | 1 | Low-quality | 16.24 |
| Sample_T16C_k141_78461            | 7337  | 11 | 2 | 0 | Low-quality | 16.23 |
| Sample_T16B_k141_43977            | 15799 | 15 | 0 | 4 | Low-quality | 16.22 |
| Sample_C14C_k141_130692           | 7582  | 11 | 7 | 0 | Low-quality | 16.22 |
| Sample_T8C_k141_142821            | 8476  | 10 | 5 | 0 | Low-quality | 16.22 |
| Sample_C12A_k141_208085           | 9706  | 13 | 0 | 4 | Low-quality | 16.21 |
| Sample_T10A_k141_25335            | 7528  | 6  | 0 | 4 | Low-quality | 16.21 |

|                                   |       |    |    |    |             |       |
|-----------------------------------|-------|----|----|----|-------------|-------|
| Sample_T2C_k141_138635            | 14397 | 9  | 0  | 2  | Low-quality | 16.21 |
| Sample_T8C_k141_56828             | 12589 | 17 | 2  | 2  | Low-quality | 16.21 |
| Sample_C8A_k141_180127            | 6590  | 8  | 3  | 0  | Low-quality | 16.21 |
| Sample_T15A_k141_66721_fragment_3 | 10712 | 12 | 1  | 0  | Low-quality | 16.21 |
| Sample_C1B_k141_144553            | 40197 | 51 | 1  | 29 | Low-quality | 16.2  |
| Sample_C2B_k141_17854             | 9700  | 8  | 0  | 1  | Low-quality | 16.2  |
| Sample_T2A_k141_206198            | 6096  | 15 | 4  | 0  | Low-quality | 16.2  |
| Sample_T2C_k141_62173             | 9849  | 9  | 6  | 0  | Low-quality | 16.2  |
| Sample_C13C_k141_81958            | 7941  | 11 | 2  | 1  | Low-quality | 16.19 |
| Sample_C9A_k141_34724             | 7072  | 18 | 7  | 0  | Low-quality | 16.19 |
| Sample_T2B_k141_251806            | 13136 | 12 | 1  | 2  | Low-quality | 16.19 |
| Sample_T12A_k141_331466           | 7746  | 13 | 8  | 0  | Low-quality | 16.19 |
| Sample_C9A_k141_67686             | 9688  | 13 | 0  | 5  | Low-quality | 16.18 |
| Sample_C7B_k141_129819            | 10120 | 8  | 4  | 0  | Low-quality | 16.18 |
| Sample_T10B_k141_136899           | 13216 | 14 | 0  | 4  | Low-quality | 16.17 |
| Sample_T15C_k141_44107            | 7008  | 13 | 1  | 0  | Low-quality | 16.17 |
| Sample_T6A_k141_162353            | 14214 | 7  | 0  | 3  | Low-quality | 16.17 |
| Sample_C12A_k141_5434             | 6698  | 12 | 5  | 0  | Low-quality | 16.17 |
| Sample_T8C_k141_137774            | 9671  | 16 | 1  | 0  | Low-quality | 16.17 |
| Sample_T13C_k141_29134            | 8068  | 16 | 1  | 7  | Low-quality | 16.16 |
| Sample_C8B_k141_4736              | 6381  | 16 | 4  | 0  | Low-quality | 16.16 |
| Sample_T11C_k141_16263            | 10682 | 13 | 1  | 0  | Low-quality | 16.16 |
| Sample_T18B_k141_90801            | 8668  | 14 | 3  | 0  | Low-quality | 16.16 |
| Sample_T1B_k141_2900              | 13303 | 20 | 1  | 1  | Low-quality | 16.16 |
| Sample_C2A_k141_66104             | 14064 | 24 | 0  | 11 | Low-quality | 16.15 |
| Sample_C10A_k141_20080_fragment_1 | 7221  | 10 | 6  | 0  | Low-quality | 16.15 |
| Sample_C3A_k141_228725            | 7347  | 10 | 10 | 0  | Low-quality | 16.15 |
| Sample_T10B_k141_62461            | 9505  | 25 | 1  | 0  | Low-quality | 16.15 |
| Sample_T15C_k141_523              | 6047  | 3  | 0  | 1  | Low-quality | 16.14 |
| Sample_T12A_k141_117442           | 6530  | 14 | 3  | 0  | Low-quality | 16.14 |
| Sample_T13B_k141_25208_fragment_1 | 26262 | 46 | 1  | 0  | Low-quality | 16.14 |
| Sample_C3C_k141_181228            | 10455 | 11 | 0  | 3  | Low-quality | 16.13 |
| Sample_T6B_k141_127604            | 8989  | 10 | 0  | 3  | Low-quality | 16.12 |
| Sample_T11C_k141_25127            | 5847  | 7  | 2  | 0  | Low-quality | 16.11 |
| Sample_T16C_k141_34385            | 9721  | 21 | 0  | 1  | Low-quality | 16.11 |
| Sample_T6C_k141_132139            | 14703 | 18 | 2  | 3  | Low-quality | 16.11 |
| Sample_C1C_k141_142374            | 18436 | 23 | 2  | 3  | Low-quality | 16.11 |
| Sample_C6C_k141_129426_fragment_1 | 22796 | 25 | 2  | 3  | Low-quality | 16.11 |
| Sample_C9A_k141_32816             | 6746  | 11 | 7  | 0  | Low-quality | 16.11 |

|                                   |       |    |    |    |             |       |
|-----------------------------------|-------|----|----|----|-------------|-------|
| Sample_C8B_k141_48201             | 10637 | 15 | 1  | 4  | Low-quality | 16.1  |
| Sample_T14A_k141_17393            | 18489 | 18 | 0  | 4  | Low-quality | 16.1  |
| Sample_C5A_k141_119239            | 8406  | 8  | 0  | 2  | Low-quality | 16.09 |
| Sample_C12A_k141_195850           | 6380  | 7  | 1  | 0  | Low-quality | 16.09 |
| Sample_C13A_k141_10261_fragment_1 | 12370 | 18 | 5  | 0  | Low-quality | 16.09 |
| Sample_C10C_k141_211203           | 8195  | 12 | 1  | 2  | Low-quality | 16.08 |
| Sample_C2C_k141_56494             | 10697 | 14 | 12 | 0  | Low-quality | 16.08 |
| Sample_C13A_k141_15197            | 9623  | 13 | 1  | 0  | Low-quality | 16.07 |
| Sample_C9C_k141_78554             | 12767 | 10 | 0  | 3  | Low-quality | 16.07 |
| Sample_T4B_k141_197573            | 7801  | 7  | 0  | 3  | Low-quality | 16.07 |
| Sample_C2A_k141_327237            | 8261  | 7  | 0  | 2  | Low-quality | 16.06 |
| Sample_T6B_k141_20135             | 7685  | 8  | 0  | 0  | Low-quality | 16.06 |
| Sample_T8C_k141_119254            | 19317 | 26 | 0  | 7  | Low-quality | 16.06 |
| Sample_C4B_k141_192741            | 6242  | 8  | 4  | 0  | Low-quality | 16.06 |
| Sample_C6B_k141_145311            | 54491 | 40 | 1  | 19 | Low-quality | 16.05 |
| Sample_T6A_k141_173429            | 8935  | 10 | 0  | 7  | Low-quality | 16.05 |
| Sample_T8A_k141_159003            | 7685  | 16 | 1  | 1  | Low-quality | 16.05 |
| Sample_C3A_k141_97458             | 8447  | 7  | 1  | 0  | Low-quality | 16.05 |
| Sample_C5C_k141_34111             | 6710  | 15 | 0  | 0  | Low-quality | 16.05 |
| Sample_C9C_k141_69491             | 5659  | 6  | 2  | 0  | Low-quality | 16.05 |
| Sample_T2A_k141_30990             | 34787 | 62 | 2  | 2  | Low-quality | 16.04 |
| Sample_T3B_k141_22369             | 5907  | 6  | 5  | 0  | Low-quality | 16.04 |
| Sample_C6A_k141_71918             | 20567 | 36 | 3  | 1  | Low-quality | 16.03 |
| Sample_T13A_k141_111853           | 21336 | 28 | 5  | 1  | Low-quality | 16.03 |
| Sample_T6B_k141_16201             | 8210  | 10 | 1  | 0  | Low-quality | 16.03 |
| Sample_T17B_k141_30927            | 13888 | 13 | 1  | 9  | Low-quality | 16.02 |
| Sample_C13A_k141_26536            | 5917  | 9  | 5  | 0  | Low-quality | 16.02 |
| Sample_C4C_k141_46548_fragment_1  | 23149 | 14 | 3  | 0  | Low-quality | 16.02 |
| Sample_C9C_k141_58569             | 5649  | 11 | 4  | 0  | Low-quality | 16.02 |
| Sample_T18A_k141_124119           | 9203  | 19 | 1  | 0  | Low-quality | 16.02 |
| Sample_C6B_k141_36892             | 7437  | 5  | 0  | 2  | Low-quality | 16.01 |
| Sample_T14A_k141_151235           | 13083 | 13 | 0  | 6  | Low-quality | 16.01 |
| Sample_C13A_k141_17592            | 5545  | 12 | 0  | 2  | Low-quality | 16.01 |
| Sample_T8B_k141_2126              | 13182 | 19 | 6  | 2  | Low-quality | 16.01 |
| Sample_C1B_k141_105566            | 5957  | 10 | 6  | 0  | Low-quality | 16    |
| Sample_T12B_k141_108472           | 17972 | 37 | 2  | 0  | Low-quality | 16    |
| Sample_C2B_k141_55014             | 6650  | 12 | 2  | 0  | Low-quality | 15.99 |
| Sample_C9B_k141_47930             | 7345  | 14 | 3  | 0  | Low-quality | 15.99 |
| Sample_T2A_k141_213042            | 6078  | 14 | 2  | 0  | Low-quality | 15.99 |

|                                   |       |    |    |    |             |       |
|-----------------------------------|-------|----|----|----|-------------|-------|
| Sample_T10A_k141_152403           | 7257  | 10 | 5  | 0  | Low-quality | 15.98 |
| Sample_T5C_k141_123890            | 7465  | 12 | 10 | 1  | Low-quality | 15.98 |
| Sample_T8B_k141_124716            | 7199  | 10 | 3  | 0  | Low-quality | 15.98 |
| Sample_T5B_k141_26083             | 8721  | 10 | 0  | 0  | Low-quality | 15.97 |
| Sample_C10A_k141_140709           | 6393  | 20 | 3  | 0  | Low-quality | 15.97 |
| Sample_C7B_k141_52813             | 12899 | 12 | 5  | 0  | Low-quality | 15.97 |
| Sample_C5A_k141_44513             | 28148 | 62 | 3  | 0  | Low-quality | 15.96 |
| Sample_T18A_k141_12717            | 6951  | 12 | 9  | 0  | Low-quality | 15.96 |
| Sample_T14B_k141_181954           | 9910  | 15 | 0  | 1  | Low-quality | 15.95 |
| Sample_C9C_k141_20464             | 5958  | 11 | 1  | 1  | Low-quality | 15.93 |
| Sample_C10A_k141_310588           | 9530  | 11 | 0  | 4  | Low-quality | 15.92 |
| Sample_T4B_k141_26271             | 13412 | 17 | 0  | 2  | Low-quality | 15.92 |
| Sample_C3A_k141_224789_fragment_1 | 9131  | 12 | 5  | 0  | Low-quality | 15.92 |
| Sample_C5C_k141_13973             | 7286  | 16 | 13 | 0  | Low-quality | 15.92 |
| Sample_C7A_k141_28378             | 7517  | 12 | 7  | 0  | Low-quality | 15.92 |
| Sample_T7B_k141_67145             | 13111 | 14 | 2  | 1  | Low-quality | 15.92 |
| Sample_C11B_k141_79385            | 30788 | 27 | 0  | 15 | Low-quality | 15.91 |
| Sample_C2A_k141_71088             | 8016  | 12 | 0  | 5  | Low-quality | 15.91 |
| Sample_C4B_k141_31238             | 28806 | 67 | 1  | 2  | Low-quality | 15.91 |
| Sample_T2C_k141_176887            | 6671  | 6  | 0  | 4  | Low-quality | 15.91 |
| Sample_C3A_k141_134810_fragment_1 | 8015  | 9  | 0  | 1  | Low-quality | 15.91 |
| Sample_T14B_k141_145600           | 6627  | 6  | 0  | 2  | Low-quality | 15.9  |
| Sample_C6B_k141_74446             | 6622  | 7  | 2  | 0  | Low-quality | 15.9  |
| Sample_T17B_k141_29999            | 15056 | 18 | 0  | 3  | Low-quality | 15.89 |
| Sample_T6B_k141_183408            | 12987 | 15 | 0  | 9  | Low-quality | 15.89 |
| Sample_C2A_k141_86065             | 8979  | 17 | 6  | 0  | Low-quality | 15.89 |
| Sample_C2C_k141_52194             | 6602  | 5  | 2  | 0  | Low-quality | 15.89 |
| Sample_C4B_k141_186895            | 14181 | 9  | 1  | 4  | Low-quality | 15.88 |
| Sample_C14A_k141_78749            | 16383 | 31 | 5  | 0  | Low-quality | 15.88 |
| Sample_T2B_k141_293600            | 6774  | 4  | 0  | 1  | Low-quality | 15.87 |
| Sample_T2C_k141_3837              | 7981  | 11 | 0  | 2  | Low-quality | 15.87 |
| Sample_C2B_k141_328861            | 7845  | 19 | 5  | 0  | Low-quality | 15.87 |
| Sample_C8A_k141_69653             | 11200 | 19 | 2  | 0  | Low-quality | 15.87 |
| Sample_T10B_k141_67975            | 13753 | 19 | 1  | 0  | Low-quality | 15.87 |
| Sample_T4B_k141_166188            | 6547  | 6  | 4  | 0  | Low-quality | 15.87 |
| Sample_T5A_k141_25117_fragment_1  | 12799 | 20 | 5  | 0  | Low-quality | 15.87 |
| Sample_T12C_k141_97465_fragment_1 | 18356 | 14 | 5  | 1  | Low-quality | 15.85 |
| Sample_T17B_k141_572              | 11552 | 15 | 1  | 3  | Low-quality | 15.85 |
| Sample_T2A_k141_221984            | 6496  | 7  | 0  | 0  | Low-quality | 15.85 |

|                                    |       |    |   |    |             |       |
|------------------------------------|-------|----|---|----|-------------|-------|
| Sample_T1C_k141_33910              | 7364  | 6  | 0 | 1  | Low-quality | 15.84 |
| Sample_C8B_k141_141468_fragment_1  | 7152  | 13 | 2 | 0  | Low-quality | 15.84 |
| Sample_C11A_k141_31710_fragment_1  | 16830 | 17 | 6 | 2  | Low-quality | 15.83 |
| Sample_C3A_k141_112103             | 7121  | 11 | 1 | 1  | Low-quality | 15.83 |
| Sample_C8C_k141_144590             | 7071  | 13 | 9 | 0  | Low-quality | 15.83 |
| Sample_T4B_k141_325167             | 6934  | 10 | 5 | 0  | Low-quality | 15.83 |
| Sample_T11C_k141_160780            | 14955 | 13 | 2 | 2  | Low-quality | 15.82 |
| Sample_T4B_k141_252993             | 12782 | 14 | 1 | 2  | Low-quality | 15.82 |
| Sample_C13B_k141_115500            | 6083  | 4  | 4 | 0  | Low-quality | 15.82 |
| Sample_C3B_k141_49149              | 9059  | 21 | 3 | 1  | Low-quality | 15.82 |
| Sample_C4C_k141_39028              | 9787  | 19 | 3 | 0  | Low-quality | 15.82 |
| Sample_T8B_k141_11836              | 6627  | 13 | 4 | 0  | Low-quality | 15.82 |
| Sample_C4A_k141_239055             | 39233 | 36 | 1 | 27 | Low-quality | 15.81 |
| Sample_C5A_k141_121549             | 9762  | 11 | 1 | 1  | Low-quality | 15.81 |
| Sample_C12A_k141_63017_fragment_1  | 5196  | 11 | 1 | 0  | Low-quality | 15.81 |
| Sample_C12C_k141_70177             | 5723  | 11 | 4 | 0  | Low-quality | 15.81 |
| Sample_T2C_k141_145922             | 6833  | 13 | 0 | 0  | Low-quality | 15.81 |
| Sample_C4C_k141_72803              | 9495  | 13 | 3 | 0  | Low-quality | 15.8  |
| Sample_C3C_k141_262843             | 8418  | 12 | 3 | 1  | Low-quality | 15.8  |
| Sample_T12A_k141_289               | 12560 | 15 | 0 | 6  | Low-quality | 15.79 |
| Sample_C12C_k141_203210            | 6634  | 13 | 0 | 0  | Low-quality | 15.79 |
| Sample_C2A_k141_136967             | 6386  | 13 | 4 | 0  | Low-quality | 15.79 |
| Sample_C2B_k141_208969             | 6451  | 15 | 4 | 0  | Low-quality | 15.79 |
| Sample_C4C_k141_231642             | 8455  | 8  | 0 | 0  | Low-quality | 15.78 |
| Sample_C13B_k141_112080            | 5158  | 5  | 1 | 0  | Low-quality | 15.78 |
| Sample_T5B_k141_35780              | 5962  | 15 | 1 | 0  | Low-quality | 15.78 |
| Sample_T8C_k141_92303_fragment_1   | 8268  | 12 | 2 | 0  | Low-quality | 15.78 |
| Sample_T3A_k141_83507              | 9719  | 2  | 1 | 0  | Low-quality | 15.77 |
| Sample_C12B_k141_53391             | 9317  | 10 | 1 | 0  | Low-quality | 15.77 |
| Sample_C3B_k141_247065             | 11014 | 15 | 9 | 0  | Low-quality | 15.77 |
| Sample_T6C_k141_63555              | 7989  | 8  | 0 | 1  | Low-quality | 15.76 |
| Sample_C4C_k141_179425             | 9724  | 25 | 3 | 0  | Low-quality | 15.76 |
| Sample_C8B_k141_26043_fragment_1   | 12118 | 18 | 5 | 0  | Low-quality | 15.76 |
| Sample_T12C_k141_174053            | 12048 | 26 | 5 | 0  | Low-quality | 15.76 |
| Sample_C13C_k141_106716_fragment_1 | 12109 | 19 | 5 | 0  | Low-quality | 15.75 |
| Sample_C8A_k141_39318              | 5609  | 9  | 6 | 0  | Low-quality | 15.75 |
| Sample_T6B_k141_150084             | 5478  | 11 | 9 | 0  | Low-quality | 15.75 |
| Sample_C14A_k141_148262            | 15677 | 14 | 0 | 12 | Low-quality | 15.74 |
| Sample_T1B_k141_29738              | 10402 | 7  | 1 | 0  | Low-quality | 15.74 |

|                                    |       |    |   |    |             |       |
|------------------------------------|-------|----|---|----|-------------|-------|
| Sample_C10A_k141_231577            | 6232  | 13 | 2 | 0  | Low-quality | 15.74 |
| Sample_T13B_k141_176519            | 9476  | 12 | 1 | 0  | Low-quality | 15.74 |
| Sample_T7A_k141_101719             | 6105  | 8  | 6 | 0  | Low-quality | 15.74 |
| Sample_C3C_k141_87416              | 6026  | 3  | 0 | 1  | Low-quality | 15.73 |
| Sample_T2B_k141_202672             | 86131 | 79 | 1 | 49 | Low-quality | 15.73 |
| Sample_T2C_k141_145610             | 6278  | 10 | 6 | 0  | Low-quality | 15.73 |
| Sample_C12A_k141_78021             | 6520  | 6  | 0 | 0  | Low-quality | 15.72 |
| Sample_C6B_k141_27293              | 13768 | 12 | 1 | 6  | Low-quality | 15.72 |
| Sample_C3A_k141_244175             | 7798  | 13 | 7 | 0  | Low-quality | 15.72 |
| Sample_C2C_k141_241126             | 12555 | 11 | 0 | 8  | Low-quality | 15.71 |
| Sample_T14C_k141_75373             | 7759  | 8  | 0 | 1  | Low-quality | 15.71 |
| Sample_C11C_k141_1737              | 7168  | 10 | 1 | 0  | Low-quality | 15.71 |
| Sample_T8A_k141_197847             | 5872  | 9  | 3 | 0  | Low-quality | 15.71 |
| Sample_C12B_k141_64794             | 10374 | 13 | 1 | 1  | Low-quality | 15.7  |
| Sample_C14C_k141_115200            | 18716 | 16 | 0 | 11 | Low-quality | 15.69 |
| Sample_C1B_k141_268958             | 6593  | 6  | 0 | 5  | Low-quality | 15.69 |
| Sample_C6B_k141_204263             | 16974 | 18 | 0 | 5  | Low-quality | 15.69 |
| Sample_T14A_k141_45613             | 8176  | 9  | 0 | 3  | Low-quality | 15.69 |
| Sample_C11B_k141_248356            | 5303  | 7  | 4 | 1  | Low-quality | 15.69 |
| Sample_C14A_k141_188902            | 6036  | 7  | 3 | 0  | Low-quality | 15.69 |
| Sample_C1B_k141_237107             | 26571 | 18 | 5 | 0  | Low-quality | 15.69 |
| Sample_C8B_k141_98610              | 8104  | 7  | 0 | 0  | Low-quality | 15.69 |
| Sample_T15A_k141_13406             | 6337  | 11 | 5 | 0  | Low-quality | 15.69 |
| Sample_T8B_k141_254615             | 22975 | 13 | 2 | 0  | Low-quality | 15.69 |
| Sample_T10A_k141_54003             | 6401  | 6  | 5 | 0  | Low-quality | 15.68 |
| Sample_T10B_k141_171402_fragment_3 | 19724 | 38 | 1 | 0  | Low-quality | 15.68 |
| Sample_T5B_k141_8595               | 15461 | 15 | 0 | 3  | Low-quality | 15.67 |
| Sample_C3B_k141_221887             | 5556  | 8  | 3 | 0  | Low-quality | 15.67 |
| Sample_C4C_k141_29219_fragment_1   | 8391  | 10 | 1 | 1  | Low-quality | 15.67 |
| Sample_C7C_k141_12109              | 7009  | 12 | 5 | 0  | Low-quality | 15.67 |
| Sample_T16A_k141_121136            | 8386  | 15 | 4 | 0  | Low-quality | 15.67 |
| Sample_C12A_k141_26346             | 16450 | 15 | 0 | 3  | Low-quality | 15.66 |
| Sample_C3C_k141_41715              | 5903  | 9  | 1 | 0  | Low-quality | 15.66 |
| Sample_T13B_k141_135489            | 9375  | 9  | 0 | 4  | Low-quality | 15.66 |
| Sample_C13A_k141_105997            | 9311  | 8  | 1 | 0  | Low-quality | 15.66 |
| Sample_T16B_k141_6100              | 7631  | 6  | 1 | 0  | Low-quality | 15.64 |
| Sample_T17C_k141_10361             | 16178 | 13 | 0 | 6  | Low-quality | 15.64 |
| Sample_C3A_k141_144222             | 6252  | 5  | 2 | 0  | Low-quality | 15.64 |
| Sample_C6C_k141_143501             | 6359  | 10 | 7 | 0  | Low-quality | 15.64 |

|                                  |       |    |   |    |             |       |
|----------------------------------|-------|----|---|----|-------------|-------|
| Sample_T2B_k141_47776            | 5655  | 9  | 3 | 0  | Low-quality | 15.64 |
| Sample_C3B_k141_231204           | 85592 | 73 | 1 | 56 | Low-quality | 15.63 |
| Sample_T18A_k141_61984           | 12121 | 17 | 0 | 1  | Low-quality | 15.63 |
| Sample_T4C_k141_125196           | 16142 | 21 | 0 | 2  | Low-quality | 15.63 |
| Sample_T5C_k141_157440           | 5132  | 12 | 1 | 0  | Low-quality | 15.62 |
| Sample_C10A_k141_304233          | 6086  | 6  | 3 | 0  | Low-quality | 15.62 |
| Sample_C2B_k141_224171           | 5478  | 8  | 7 | 0  | Low-quality | 15.62 |
| Sample_T17C_k141_38590           | 5089  | 9  | 6 | 0  | Low-quality | 15.62 |
| Sample_C8C_k141_18350            | 6959  | 4  | 0 | 1  | Low-quality | 15.61 |
| Sample_T11C_k141_62358           | 23228 | 21 | 1 | 2  | Low-quality | 15.61 |
| Sample_T15C_k141_127622          | 8137  | 10 | 0 | 1  | Low-quality | 15.61 |
| Sample_C12A_k141_93126           | 5941  | 14 | 3 | 0  | Low-quality | 15.61 |
| Sample_C8A_k141_102239           | 6071  | 15 | 1 | 1  | Low-quality | 15.61 |
| Sample_C6B_k141_111235           | 9007  | 7  | 0 | 1  | Low-quality | 15.6  |
| Sample_T14A_k141_231441          | 27009 | 22 | 0 | 0  | Low-quality | 15.6  |
| Sample_C3B_k141_70088            | 15124 | 12 | 0 | 3  | Low-quality | 15.57 |
| Sample_T1C_k141_38145            | 5377  | 12 | 0 | 1  | Low-quality | 15.57 |
| Sample_T4B_k141_199453           | 24297 | 26 | 1 | 16 | Low-quality | 15.57 |
| Sample_T14A_k141_10706           | 23866 | 17 | 3 | 1  | Low-quality | 15.57 |
| Sample_C13A_k141_72318           | 8615  | 14 | 3 | 0  | Low-quality | 15.56 |
| Sample_C8A_k141_168147           | 9718  | 16 | 2 | 1  | Low-quality | 15.56 |
| Sample_C11B_k141_107231          | 7239  | 10 | 5 | 0  | Low-quality | 15.55 |
| Sample_T15C_k141_84566           | 7251  | 6  | 1 | 0  | Low-quality | 15.55 |
| Sample_T6B_k141_64632            | 6478  | 16 | 3 | 0  | Low-quality | 15.55 |
| Sample_T7B_k141_25521            | 11089 | 11 | 2 | 1  | Low-quality | 15.55 |
| Sample_T10A_k141_182660          | 6159  | 14 | 0 | 1  | Low-quality | 15.54 |
| Sample_T15C_k141_42852           | 6618  | 9  | 0 | 0  | Low-quality | 15.54 |
| Sample_T8B_k141_173565           | 6546  | 4  | 0 | 1  | Low-quality | 15.54 |
| Sample_C11C_k141_181521          | 9354  | 9  | 1 | 0  | Low-quality | 15.54 |
| Sample_C7B_k141_48220_fragment_1 | 10916 | 7  | 1 | 2  | Low-quality | 15.54 |
| Sample_T10C_k141_21313           | 9428  | 17 | 1 | 0  | Low-quality | 15.54 |
| Sample_C6B_k141_47527            | 11301 | 16 | 2 | 4  | Low-quality | 15.53 |
| Sample_T17B_k141_981             | 7458  | 8  | 0 | 0  | Low-quality | 15.53 |
| Sample_T1B_k141_42986            | 7573  | 8  | 0 | 6  | Low-quality | 15.52 |
| Sample_T8B_k141_228722           | 12539 | 18 | 1 | 5  | Low-quality | 15.52 |
| Sample_T12A_k141_336984          | 12830 | 20 | 1 | 1  | Low-quality | 15.51 |
| Sample_T5B_k141_25847            | 8835  | 6  | 0 | 2  | Low-quality | 15.51 |
| Sample_C13C_k141_15947           | 9643  | 13 | 1 | 4  | Low-quality | 15.51 |
| Sample_T2C_k141_38494            | 6950  | 16 | 1 | 0  | Low-quality | 15.51 |



|                                    |       |    |    |    |             |       |
|------------------------------------|-------|----|----|----|-------------|-------|
| Sample_T3C_k141_60020              | 8985  | 18 | 0  | 1  | Low-quality | 15.5  |
| Sample_T6A_k141_135669             | 8072  | 8  | 0  | 1  | Low-quality | 15.5  |
| Sample_C6B_k141_115141             | 6971  | 13 | 10 | 0  | Low-quality | 15.5  |
| Sample_T3C_k141_13139              | 6775  | 7  | 4  | 0  | Low-quality | 15.5  |
| Sample_C4B_k141_251661             | 7742  | 8  | 0  | 6  | Low-quality | 15.49 |
| Sample_C9A_k141_43118              | 6285  | 12 | 4  | 0  | Low-quality | 15.49 |
| Sample_T11C_k141_139768_fragment_1 | 6970  | 9  | 3  | 0  | Low-quality | 15.49 |
| Sample_T8A_k141_63107_fragment_2   | 7617  | 10 | 1  | 0  | Low-quality | 15.49 |
| Sample_C1A_k141_59159              | 6137  | 5  | 0  | 3  | Low-quality | 15.48 |
| Sample_C11B_k141_212947            | 5242  | 9  | 4  | 0  | Low-quality | 15.48 |
| Sample_C13C_k141_15556_fragment_1  | 16166 | 21 | 1  | 2  | Low-quality | 15.48 |
| Sample_T3C_k141_104084             | 8614  | 11 | 0  | 6  | Low-quality | 15.47 |
| Sample_C4C_k141_111037             | 7338  | 13 | 10 | 0  | Low-quality | 15.47 |
| Sample_T5B_k141_69502              | 5829  | 11 | 4  | 0  | Low-quality | 15.47 |
| Sample_T6C_k141_114070             | 5537  | 11 | 2  | 1  | Low-quality | 15.47 |
| Sample_C5B_k141_45369_fragment_1   | 8574  | 12 | 4  | 0  | Low-quality | 15.46 |
| Sample_T16B_k141_59190             | 31613 | 27 | 1  | 21 | Low-quality | 15.45 |
| Sample_C4C_k141_218378             | 16672 | 13 | 0  | 8  | Low-quality | 15.44 |
| Sample_C10C_k141_33834             | 5608  | 13 | 1  | 0  | Low-quality | 15.44 |
| Sample_C14A_k141_226659            | 5272  | 14 | 1  | 0  | Low-quality | 15.44 |
| Sample_T11A_k141_137627            | 6493  | 10 | 6  | 0  | Low-quality | 15.44 |
| Sample_C12A_k141_6047              | 6081  | 7  | 3  | 0  | Low-quality | 15.43 |
| Sample_C7B_k141_112122_fragment_1  | 31514 | 30 | 2  | 6  | Low-quality | 15.43 |
| Sample_C13C_k141_82798             | 6232  | 12 | 2  | 0  | Low-quality | 15.42 |
| Sample_C3C_k141_202546             | 8565  | 8  | 0  | 0  | Low-quality | 15.4  |
| Sample_T18A_k141_182024            | 9437  | 17 | 1  | 1  | Low-quality | 15.4  |
| Sample_T7A_k141_149248             | 13860 | 9  | 0  | 2  | Low-quality | 15.4  |
| Sample_T7A_k141_173421             | 5943  | 10 | 6  | 0  | Low-quality | 15.4  |
| Sample_C7B_k141_137082             | 8581  | 4  | 0  | 1  | Low-quality | 15.39 |
| Sample_C11B_k141_69260             | 13354 | 24 | 0  | 0  | Low-quality | 15.39 |
| Sample_C4C_k141_150692             | 6480  | 15 | 1  | 0  | Low-quality | 15.39 |
| Sample_C4C_k141_134329             | 5178  | 8  | 1  | 1  | Low-quality | 15.39 |
| Sample_C11A_k141_38577             | 24519 | 28 | 1  | 7  | Low-quality | 15.38 |
| Sample_C1B_k141_46721              | 5530  | 5  | 4  | 0  | Low-quality | 15.38 |
| Sample_C4A_k141_61097_fragment_1   | 8246  | 16 | 5  | 0  | Low-quality | 15.38 |
| Sample_C6C_k141_85462              | 15613 | 17 | 0  | 0  | Low-quality | 15.38 |
| Sample_C4C_k141_173520             | 6484  | 8  | 2  | 0  | Low-quality | 15.37 |
| Sample_T14A_k141_199005            | 17560 | 18 | 1  | 2  | Low-quality | 15.37 |
| Sample_T14A_k141_145429            | 8396  | 10 | 0  | 1  | Low-quality | 15.37 |

|                                   |       |    |    |   |             |       |
|-----------------------------------|-------|----|----|---|-------------|-------|
| Sample_C13B_k141_62948            | 6119  | 4  | 3  | 0 | Low-quality | 15.37 |
| Sample_T14B_k141_216644           | 7287  | 13 | 0  | 0 | Low-quality | 15.37 |
| Sample_T14A_k141_173473           | 17392 | 18 | 0  | 1 | Low-quality | 15.36 |
| Sample_T14A_k141_46864            | 12176 | 29 | 0  | 0 | Low-quality | 15.36 |
| Sample_C12A_k141_148391           | 6438  | 15 | 0  | 0 | Low-quality | 15.36 |
| Sample_C10C_k141_158844           | 6043  | 8  | 6  | 0 | Low-quality | 15.35 |
| Sample_T6C_k141_149582            | 11534 | 20 | 5  | 3 | Low-quality | 15.35 |
| Sample_T11C_k141_81239            | 10825 | 10 | 1  | 1 | Low-quality | 15.34 |
| Sample_C12A_k141_102645           | 9091  | 13 | 1  | 0 | Low-quality | 15.34 |
| Sample_C12C_k141_209914           | 7525  | 9  | 6  | 0 | Low-quality | 15.34 |
| Sample_T10A_k141_43994            | 6960  | 5  | 5  | 0 | Low-quality | 15.34 |
| Sample_T17B_k141_23128            | 6888  | 13 | 11 | 0 | Low-quality | 15.34 |
| Sample_T3B_k141_169523_fragment_1 | 8147  | 12 | 1  | 0 | Low-quality | 15.34 |
| Sample_T5C_k141_11332             | 6760  | 8  | 0  | 0 | Low-quality | 15.34 |
| Sample_T10B_k141_142819           | 6580  | 9  | 3  | 0 | Low-quality | 15.33 |
| Sample_T13A_k141_85783            | 6284  | 9  | 1  | 0 | Low-quality | 15.33 |
| Sample_C4B_k141_30984             | 5506  | 4  | 0  | 2 | Low-quality | 15.32 |
| Sample_C11B_k141_113991           | 9964  | 16 | 2  | 0 | Low-quality | 15.32 |
| Sample_C3B_k141_261363            | 12460 | 24 | 5  | 2 | Low-quality | 15.32 |
| Sample_T17B_k141_16905            | 5777  | 8  | 1  | 0 | Low-quality | 15.32 |
| Sample_C7B_k141_37016             | 8431  | 8  | 0  | 0 | Low-quality | 15.31 |
| Sample_T14B_k141_198620           | 5766  | 9  | 0  | 1 | Low-quality | 15.31 |
| Sample_T4B_k141_151343            | 6678  | 7  | 1  | 0 | Low-quality | 15.31 |
| Sample_T3A_k141_19539             | 5917  | 7  | 0  | 1 | Low-quality | 15.3  |
| Sample_T2C_k141_220989            | 5860  | 5  | 2  | 0 | Low-quality | 15.3  |
| Sample_T6A_k141_289478            | 5715  | 7  | 5  | 0 | Low-quality | 15.3  |
| Sample_C5C_k141_30770             | 8650  | 7  | 0  | 1 | Low-quality | 15.29 |
| Sample_T7B_k141_46292             | 11375 | 11 | 1  | 1 | Low-quality | 15.29 |
| Sample_C11B_k141_175152           | 12489 | 11 | 0  | 0 | Low-quality | 15.28 |
| Sample_C5B_k141_29574             | 6458  | 6  | 0  | 4 | Low-quality | 15.28 |
| Sample_T4B_k141_310379            | 13219 | 15 | 1  | 6 | Low-quality | 15.28 |
| Sample_T2B_k141_276195            | 6789  | 9  | 2  | 0 | Low-quality | 15.28 |
| Sample_T4B_k141_203822_fragment_2 | 6209  | 13 | 1  | 0 | Low-quality | 15.28 |
| Sample_C1A_k141_232230            | 6916  | 6  | 1  | 0 | Low-quality | 15.27 |
| Sample_T5C_k141_53383             | 6412  | 7  | 0  | 2 | Low-quality | 15.26 |
| Sample_T7A_k141_160440            | 8511  | 8  | 0  | 2 | Low-quality | 15.26 |
| Sample_C10C_k141_206712           | 5988  | 9  | 7  | 0 | Low-quality | 15.26 |
| Sample_C11C_k141_181618           | 7215  | 12 | 3  | 0 | Low-quality | 15.26 |
| Sample_C4A_k141_129596            | 6995  | 11 | 0  | 0 | Low-quality | 15.26 |

|                                    |       |    |   |    |             |       |
|------------------------------------|-------|----|---|----|-------------|-------|
| Sample_T14B_k141_112034            | 5690  | 5  | 2 | 0  | Low-quality | 15.26 |
| Sample_C3A_k141_97008              | 5761  | 13 | 1 | 0  | Low-quality | 15.25 |
| Sample_T10A_k141_39456             | 12753 | 20 | 3 | 0  | Low-quality | 15.25 |
| Sample_T15B_k141_130761            | 19128 | 30 | 3 | 2  | Low-quality | 15.25 |
| Sample_T2C_k141_35257              | 5944  | 13 | 0 | 0  | Low-quality | 15.25 |
| Sample_C13B_k141_55146             | 9165  | 8  | 0 | 7  | Low-quality | 15.24 |
| Sample_T12B_k141_19934             | 5837  | 3  | 0 | 2  | Low-quality | 15.24 |
| Sample_C11B_k141_107576            | 6861  | 10 | 3 | 0  | Low-quality | 15.24 |
| Sample_C4B_k141_192872             | 7528  | 11 | 6 | 0  | Low-quality | 15.24 |
| Sample_C8C_k141_30868              | 7228  | 9  | 2 | 0  | Low-quality | 15.24 |
| Sample_C12A_k141_94180             | 15847 | 16 | 0 | 14 | Low-quality | 15.23 |
| Sample_T3B_k141_118461             | 27725 | 28 | 0 | 8  | Low-quality | 15.23 |
| Sample_T17A_k141_9916              | 10057 | 12 | 1 | 4  | Low-quality | 15.22 |
| Sample_T18B_k141_72733             | 8112  | 11 | 0 | 4  | Low-quality | 15.22 |
| Sample_T12A_k141_114818_fragment_1 | 8255  | 15 | 6 | 0  | Low-quality | 15.22 |
| Sample_T14B_k141_46048             | 5489  | 8  | 6 | 0  | Low-quality | 15.22 |
| Sample_C4C_k141_91170              | 7559  | 9  | 0 | 1  | Low-quality | 15.21 |
| Sample_T3C_k141_118955             | 8831  | 15 | 1 | 1  | Low-quality | 15.21 |
| Sample_T5A_k141_43740              | 9881  | 11 | 0 | 4  | Low-quality | 15.21 |
| Sample_C1C_k141_96568              | 5372  | 13 | 5 | 0  | Low-quality | 15.21 |
| Sample_C4B_k141_85126              | 26846 | 28 | 9 | 0  | Low-quality | 15.21 |
| Sample_C6B_k141_55444              | 6103  | 12 | 6 | 0  | Low-quality | 15.21 |
| Sample_T11A_k141_91692             | 5521  | 8  | 0 | 0  | Low-quality | 15.21 |
| Sample_T2B_k141_84752              | 7909  | 10 | 0 | 0  | Low-quality | 15.21 |
| Sample_C14B_k141_43758             | 6988  | 5  | 0 | 2  | Low-quality | 15.2  |
| Sample_C12B_k141_59773             | 5397  | 16 | 3 | 0  | Low-quality | 15.2  |
| Sample_C5B_k141_63112              | 7019  | 13 | 1 | 3  | Low-quality | 15.19 |
| Sample_T12C_k141_20474             | 34858 | 38 | 0 | 17 | Low-quality | 15.19 |
| Sample_T8B_k141_247644             | 10222 | 10 | 0 | 3  | Low-quality | 15.19 |
| Sample_C11C_k141_171090            | 6823  | 7  | 3 | 0  | Low-quality | 15.19 |
| Sample_C12A_k141_84618             | 6497  | 6  | 1 | 0  | Low-quality | 15.19 |
| Sample_C1B_k141_280191             | 6401  | 14 | 0 | 0  | Low-quality | 15.19 |
| Sample_T13C_k141_1007              | 8095  | 16 | 4 | 0  | Low-quality | 15.19 |
| Sample_C1C_k141_81971              | 5946  | 6  | 0 | 5  | Low-quality | 15.18 |
| Sample_C9A_k141_86594              | 18034 | 19 | 0 | 4  | Low-quality | 15.18 |
| Sample_T13C_k141_70710             | 9789  | 10 | 0 | 5  | Low-quality | 15.18 |
| Sample_T5C_k141_178039             | 19322 | 22 | 1 | 2  | Low-quality | 15.18 |
| Sample_T17B_k141_27126             | 16950 | 17 | 1 | 2  | Low-quality | 15.18 |
| Sample_C10B_k141_123720            | 6129  | 9  | 4 | 0  | Low-quality | 15.17 |

|                                    |       |    |    |   |             |       |
|------------------------------------|-------|----|----|---|-------------|-------|
| Sample_C2B_k141_23723              | 6709  | 10 | 1  | 0 | Low-quality | 15.17 |
| Sample_T12A_k141_168391            | 5957  | 8  | 4  | 0 | Low-quality | 15.17 |
| Sample_T12A_k141_177138            | 7260  | 6  | 0  | 0 | Low-quality | 15.17 |
| Sample_C4B_k141_153722             | 5041  | 5  | 0  | 4 | Low-quality | 15.16 |
| Sample_C7B_k141_954                | 7046  | 5  | 0  | 2 | Low-quality | 15.16 |
| Sample_C2C_k141_22864              | 11232 | 7  | 0  | 1 | Low-quality | 15.16 |
| Sample_T13C_k141_60933             | 15355 | 13 | 0  | 4 | Low-quality | 15.15 |
| Sample_T4B_k141_87099              | 8829  | 6  | 0  | 4 | Low-quality | 15.15 |
| Sample_T12A_k141_306861            | 7512  | 11 | 2  | 0 | Low-quality | 15.15 |
| Sample_T1A_k141_17514              | 7019  | 14 | 9  | 0 | Low-quality | 15.15 |
| Sample_T2B_k141_152962             | 23346 | 21 | 6  | 0 | Low-quality | 15.15 |
| Sample_T6A_k141_121640             | 12376 | 13 | 1  | 2 | Low-quality | 15.14 |
| Sample_T10A_k141_49333             | 5712  | 8  | 3  | 0 | Low-quality | 15.14 |
| Sample_C3C_k141_255973             | 8544  | 13 | 0  | 2 | Low-quality | 15.13 |
| Sample_C6B_k141_41110              | 12633 | 9  | 1  | 0 | Low-quality | 15.13 |
| Sample_T8A_k141_7828               | 10680 | 11 | 0  | 5 | Low-quality | 15.13 |
| Sample_C8C_k141_105740             | 34756 | 24 | 0  | 6 | Low-quality | 15.12 |
| Sample_C14C_k141_121524_fragment_2 | 11755 | 10 | 0  | 2 | Low-quality | 15.12 |
| Sample_C8B_k141_176678             | 5862  | 9  | 5  | 0 | Low-quality | 15.12 |
| Sample_C14A_k141_165729            | 5819  | 9  | 4  | 0 | Low-quality | 15.11 |
| Sample_C6B_k141_47723              | 31053 | 32 | 6  | 1 | Low-quality | 15.11 |
| Sample_C6B_k141_24381              | 6966  | 13 | 10 | 0 | Low-quality | 15.11 |
| Sample_T7A_k141_227445             | 6610  | 8  | 1  | 0 | Low-quality | 15.11 |
| Sample_C7B_k141_172143             | 17825 | 12 | 6  | 0 | Low-quality | 15.1  |
| Sample_C8C_k141_81541              | 5128  | 8  | 5  | 0 | Low-quality | 15.1  |
| Sample_T1B_k141_7553_fragment_1    | 8862  | 13 | 1  | 4 | Low-quality | 15.1  |
| Sample_T5B_k141_65716              | 7521  | 11 | 9  | 0 | Low-quality | 15.1  |
| Sample_T3A_k141_10420              | 6391  | 14 | 2  | 1 | Low-quality | 15.09 |
| Sample_C10C_k141_191045            | 7079  | 14 | 0  | 2 | Low-quality | 15.08 |
| Sample_C4C_k141_195992             | 12239 | 12 | 1  | 2 | Low-quality | 15.08 |
| Sample_T8A_k141_13344              | 8338  | 10 | 0  | 5 | Low-quality | 15.08 |
| Sample_C5A_k141_13749              | 6331  | 6  | 3  | 0 | Low-quality | 15.08 |
| Sample_T16A_k141_77433             | 6209  | 12 | 6  | 0 | Low-quality | 15.08 |
| Sample_T17A_k141_36902             | 5156  | 8  | 5  | 0 | Low-quality | 15.08 |
| Sample_T7A_k141_162320             | 5472  | 7  | 0  | 0 | Low-quality | 15.08 |
| Sample_C14A_k141_29917             | 5953  | 11 | 1  | 0 | Low-quality | 15.07 |
| Sample_C8C_k141_74996              | 9550  | 8  | 0  | 2 | Low-quality | 15.07 |
| Sample_T10B_k141_161657            | 11356 | 17 | 2  | 2 | Low-quality | 15.07 |
| Sample_T10A_k141_62178             | 9018  | 11 | 1  | 1 | Low-quality | 15.06 |

|                                   |       |    |    |    |             |       |
|-----------------------------------|-------|----|----|----|-------------|-------|
| Sample_T3A_k141_33004             | 7532  | 7  | 0  | 1  | Low-quality | 15.06 |
| Sample_C1B_k141_245563_fragment_1 | 9954  | 10 | 1  | 0  | Low-quality | 15.06 |
| Sample_C4C_k141_153145            | 10384 | 19 | 5  | 0  | Low-quality | 15.06 |
| Sample_C3A_k141_61914             | 6411  | 11 | 1  | 0  | Low-quality | 15.05 |
| Sample_T4B_k141_309032            | 6916  | 10 | 4  | 0  | Low-quality | 15.05 |
| Sample_T8C_k141_145410            | 6062  | 7  | 6  | 0  | Low-quality | 15.05 |
| Sample_T5C_k141_165751            | 5590  | 6  | 0  | 0  | Low-quality | 15.04 |
| Sample_T18B_k141_22638_fragment_1 | 9295  | 14 | 3  | 2  | Low-quality | 15.04 |
| Sample_T5B_k141_67786_fragment_1  | 5615  | 8  | 2  | 0  | Low-quality | 15.04 |
| Sample_C4B_k141_104153            | 25563 | 23 | 0  | 17 | Low-quality | 15.03 |
| Sample_C6B_k141_178349            | 10241 | 11 | 0  | 5  | Low-quality | 15.03 |
| Sample_T2C_k141_161732            | 24223 | 31 | 5  | 1  | Low-quality | 15.03 |
| Sample_C9A_k141_63494             | 26453 | 68 | 3  | 0  | Low-quality | 15.02 |
| Sample_T6C_k141_55848             | 8475  | 9  | 0  | 0  | Low-quality | 15.02 |
| Sample_T6C_k141_159214            | 9927  | 14 | 1  | 3  | Low-quality | 15.02 |
| Sample_C2B_k141_223927            | 9114  | 20 | 0  | 0  | Low-quality | 15.02 |
| Sample_C2C_k141_101305            | 9386  | 12 | 10 | 0  | Low-quality | 15.02 |
| Sample_C3C_k141_178390            | 24561 | 36 | 1  | 1  | Low-quality | 15.02 |
| Sample_T7A_k141_89374             | 11348 | 24 | 2  | 1  | Low-quality | 15.02 |
| Sample_T11A_k141_109526           | 36917 | 42 | 1  | 9  | Low-quality | 15.01 |
| Sample_C10A_k141_243771           | 20701 | 26 | 2  | 0  | Low-quality | 15.01 |
| Sample_C11B_k141_81996            | 7228  | 10 | 8  | 0  | Low-quality | 15.01 |
| Sample_C10C_k141_230037           | 7915  | 9  | 1  | 0  | Low-quality | 15    |
| Sample_T5C_k141_34285_fragment_3  | 27173 | 29 | 1  | 2  | Low-quality | 15    |
| Sample_T7C_k141_33260             | 6112  | 15 | 3  | 0  | Low-quality | 15    |
| Sample_C14A_k141_215720           | 8251  | 11 | 4  | 0  | Low-quality | 14.99 |
| Sample_C3B_k141_121621            | 7182  | 13 | 4  | 1  | Low-quality | 14.99 |
| Sample_C6A_k141_235135            | 7908  | 9  | 1  | 0  | Low-quality | 14.99 |
| Sample_T4C_k141_102729_fragment_1 | 13788 | 10 | 0  | 0  | Low-quality | 14.99 |
| Sample_C12A_k141_65422            | 5307  | 5  | 0  | 4  | Low-quality | 14.98 |
| Sample_C1A_k141_105096            | 12242 | 16 | 0  | 5  | Low-quality | 14.98 |
| Sample_C3B_k141_219662            | 10953 | 5  | 0  | 0  | Low-quality | 14.98 |
| Sample_T16A_k141_5140             | 5792  | 6  | 0  | 0  | Low-quality | 14.98 |
| Sample_C12C_k141_78861            | 7075  | 10 | 3  | 0  | Low-quality | 14.98 |
| Sample_C4B_k141_4299              | 14793 | 22 | 5  | 3  | Low-quality | 14.98 |
| Sample_C4B_k141_126537            | 8960  | 12 | 0  | 4  | Low-quality | 14.97 |
| Sample_C8A_k141_11062             | 6679  | 7  | 0  | 1  | Low-quality | 14.97 |
| Sample_T2A_k141_28529             | 72383 | 86 | 5  | 23 | Low-quality | 14.97 |
| Sample_T8B_k141_100346            | 17774 | 20 | 0  | 8  | Low-quality | 14.97 |

|                                   |       |    |    |    |             |       |
|-----------------------------------|-------|----|----|----|-------------|-------|
| Sample_C3A_k141_50071             | 6017  | 7  | 1  | 0  | Low-quality | 14.97 |
| Sample_T11A_k141_27220            | 5764  | 7  | 3  | 0  | Low-quality | 14.97 |
| Sample_C3C_k141_193988            | 5654  | 4  | 0  | 0  | Low-quality | 14.96 |
| Sample_C5A_k141_235085            | 6248  | 8  | 2  | 0  | Low-quality | 14.96 |
| Sample_C10A_k141_76415            | 7772  | 18 | 1  | 1  | Low-quality | 14.96 |
| Sample_C13C_k141_54749            | 5004  | 13 | 2  | 0  | Low-quality | 14.96 |
| Sample_C4A_k141_27917             | 8875  | 14 | 2  | 0  | Low-quality | 14.96 |
| Sample_T4C_k141_60992_fragment_1  | 9460  | 21 | 1  | 0  | Low-quality | 14.96 |
| Sample_T5B_k141_55685             | 13910 | 28 | 7  | 2  | Low-quality | 14.96 |
| Sample_C11A_k141_155756           | 5783  | 7  | 0  | 1  | Low-quality | 14.95 |
| Sample_C1C_k141_103074            | 9878  | 12 | 1  | 5  | Low-quality | 14.95 |
| Sample_C5B_k141_44539             | 8952  | 10 | 1  | 0  | Low-quality | 14.95 |
| Sample_C11C_k141_107334           | 5907  | 16 | 1  | 0  | Low-quality | 14.95 |
| Sample_C12C_k141_124427           | 7290  | 7  | 0  | 1  | Low-quality | 14.95 |
| Sample_C12C_k141_77237            | 25723 | 29 | 7  | 7  | Low-quality | 14.95 |
| Sample_T5A_k141_48849_fragment_1  | 12486 | 15 | 1  | 0  | Low-quality | 14.95 |
| Sample_C11B_k141_56828            | 7230  | 4  | 0  | 0  | Low-quality | 14.94 |
| Sample_C11A_k141_107177           | 9693  | 20 | 1  | 0  | Low-quality | 14.94 |
| Sample_T7B_k141_146367            | 8589  | 21 | 2  | 0  | Low-quality | 14.94 |
| Sample_T7B_k141_25623             | 6706  | 6  | 3  | 0  | Low-quality | 14.94 |
| Sample_C10A_k141_104201           | 9099  | 4  | 3  | 0  | Low-quality | 14.93 |
| Sample_C4C_k141_111609            | 7231  | 11 | 0  | 0  | Low-quality | 14.93 |
| Sample_C12C_k141_84439            | 82190 | 72 | 3  | 38 | Low-quality | 14.92 |
| Sample_C13C_k141_49297            | 8266  | 9  | 0  | 0  | Low-quality | 14.92 |
| Sample_T10A_k141_71864_fragment_1 | 14080 | 24 | 3  | 2  | Low-quality | 14.92 |
| Sample_T2C_k141_212206            | 25528 | 38 | 3  | 1  | Low-quality | 14.92 |
| Sample_C11C_k141_40156            | 7532  | 8  | 0  | 1  | Low-quality | 14.91 |
| Sample_T11A_k141_56954            | 24173 | 28 | 1  | 1  | Low-quality | 14.91 |
| Sample_T5B_k141_14706             | 5671  | 6  | 0  | 3  | Low-quality | 14.91 |
| Sample_C8C_k141_128977            | 7827  | 14 | 3  | 0  | Low-quality | 14.91 |
| Sample_T12B_k141_143800           | 5448  | 10 | 5  | 0  | Low-quality | 14.91 |
| Sample_C6B_k141_128906            | 5380  | 7  | 3  | 0  | Low-quality | 14.9  |
| Sample_C7C_k141_22716             | 6711  | 5  | 1  | 0  | Low-quality | 14.9  |
| Sample_T13C_k141_121429           | 7645  | 13 | 10 | 0  | Low-quality | 14.9  |
| Sample_T2B_k141_270585            | 7363  | 13 | 4  | 0  | Low-quality | 14.9  |
| Sample_T7A_k141_101426            | 5901  | 8  | 8  | 0  | Low-quality | 14.9  |
| Sample_C1A_k141_244194            | 36943 | 31 | 1  | 25 | Low-quality | 14.89 |
| Sample_C1A_k141_91503             | 7491  | 10 | 0  | 3  | Low-quality | 14.89 |
| Sample_T3C_k141_89671             | 12028 | 16 | 1  | 6  | Low-quality | 14.89 |

|                                    |       |    |   |    |             |       |
|------------------------------------|-------|----|---|----|-------------|-------|
| Sample_C1B_k141_181824             | 6963  | 10 | 4 | 0  | Low-quality | 14.89 |
| Sample_C5C_k141_96003              | 5523  | 6  | 2 | 0  | Low-quality | 14.89 |
| Sample_T4B_k141_139138             | 5551  | 11 | 4 | 0  | Low-quality | 14.89 |
| Sample_T7B_k141_105733             | 36907 | 58 | 3 | 1  | Low-quality | 14.89 |
| Sample_C13B_k141_77748             | 10815 | 15 | 0 | 1  | Low-quality | 14.88 |
| Sample_T14C_k141_122784            | 11609 | 15 | 5 | 3  | Low-quality | 14.88 |
| Sample_T4B_k141_126526             | 16244 | 24 | 3 | 0  | Low-quality | 14.88 |
| Sample_T14B_k141_130361            | 7377  | 11 | 1 | 1  | Low-quality | 14.87 |
| Sample_T5C_k141_127914             | 8629  | 16 | 1 | 4  | Low-quality | 14.87 |
| Sample_C13C_k141_3757              | 5334  | 13 | 0 | 0  | Low-quality | 14.87 |
| Sample_C4A_k141_174186             | 6813  | 8  | 7 | 0  | Low-quality | 14.87 |
| Sample_T18B_k141_124700_fragment_1 | 10102 | 9  | 3 | 2  | Low-quality | 14.87 |
| Sample_C2B_k141_115915             | 12147 | 10 | 0 | 2  | Low-quality | 14.86 |
| Sample_C4C_k141_164152             | 6248  | 12 | 1 | 0  | Low-quality | 14.86 |
| Sample_C2B_k141_264910             | 7209  | 9  | 3 | 0  | Low-quality | 14.86 |
| Sample_C6A_k141_170308             | 7169  | 15 | 2 | 0  | Low-quality | 14.86 |
| Sample_C13C_k141_93990             | 6240  | 6  | 0 | 4  | Low-quality | 14.85 |
| Sample_C10C_k141_29561             | 5924  | 6  | 6 | 0  | Low-quality | 14.85 |
| Sample_C2B_k141_291720             | 6072  | 5  | 4 | 0  | Low-quality | 14.85 |
| Sample_T10A_k141_94465             | 6347  | 15 | 2 | 0  | Low-quality | 14.85 |
| Sample_C10B_k141_103062            | 11356 | 5  | 0 | 2  | Low-quality | 14.84 |
| Sample_C6A_k141_174816             | 25910 | 26 | 0 | 20 | Low-quality | 14.84 |
| Sample_C3B_k141_94068              | 8542  | 9  | 2 | 0  | Low-quality | 14.84 |
| Sample_C7A_k141_110616             | 19856 | 40 | 4 | 2  | Low-quality | 14.84 |
| Sample_T7C_k141_137892             | 6633  | 9  | 1 | 0  | Low-quality | 14.84 |
| Sample_C3A_k141_10342              | 16042 | 13 | 0 | 3  | Low-quality | 14.83 |
| Sample_T13C_k141_10501             | 36516 | 25 | 1 | 3  | Low-quality | 14.83 |
| Sample_T7C_k141_120121             | 9959  | 13 | 0 | 1  | Low-quality | 14.83 |
| Sample_T13C_k141_41666             | 6583  | 11 | 0 | 0  | Low-quality | 14.83 |
| Sample_C2A_k141_229512             | 7506  | 8  | 0 | 1  | Low-quality | 14.82 |
| Sample_T17B_k141_33001             | 5782  | 12 | 7 | 0  | Low-quality | 14.82 |
| Sample_T4B_k141_236385             | 13329 | 12 | 0 | 1  | Low-quality | 14.81 |
| Sample_C14A_k141_147494            | 5779  | 17 | 3 | 0  | Low-quality | 14.81 |
| Sample_C6B_k141_154531             | 5251  | 10 | 0 | 0  | Low-quality | 14.81 |
| Sample_C8B_k141_185707             | 6123  | 21 | 2 | 0  | Low-quality | 14.81 |
| Sample_T15A_k141_99876_fragment_1  | 9395  | 8  | 0 | 0  | Low-quality | 14.81 |
| Sample_C12C_k141_62688             | 5056  | 8  | 4 | 0  | Low-quality | 14.8  |
| Sample_C13C_k141_45312             | 14097 | 10 | 0 | 3  | Low-quality | 14.79 |
| Sample_T11C_k141_34433             | 7544  | 7  | 0 | 1  | Low-quality | 14.79 |

|                         |       |    |    |    |             |       |
|-------------------------|-------|----|----|----|-------------|-------|
| Sample_T13B_k141_148656 | 17346 | 11 | 0  | 8  | Low-quality | 14.79 |
| Sample_T4B_k141_228664  | 22856 | 30 | 1  | 14 | Low-quality | 14.79 |
| Sample_C13A_k141_75346  | 8341  | 14 | 6  | 0  | Low-quality | 14.79 |
| Sample_T8C_k141_6397    | 6181  | 15 | 4  | 0  | Low-quality | 14.79 |
| Sample_C14C_k141_49926  | 5652  | 7  | 3  | 0  | Low-quality | 14.78 |
| Sample_C3C_k141_122797  | 6320  | 3  | 0  | 1  | Low-quality | 14.77 |
| Sample_T14B_k141_3628   | 9113  | 7  | 0  | 2  | Low-quality | 14.77 |
| Sample_C10A_k141_102956 | 9147  | 13 | 2  | 0  | Low-quality | 14.76 |
| Sample_C1A_k141_55052   | 9534  | 29 | 1  | 0  | Low-quality | 14.76 |
| Sample_C3A_k141_23681   | 5936  | 4  | 1  | 0  | Low-quality | 14.76 |
| Sample_T15B_k141_26532  | 5939  | 11 | 1  | 0  | Low-quality | 14.76 |
| Sample_C2A_k141_31107   | 21935 | 17 | 1  | 14 | Low-quality | 14.75 |
| Sample_T17C_k141_9634   | 15125 | 13 | 0  | 6  | Low-quality | 14.75 |
| Sample_T12B_k141_113091 | 5279  | 10 | 0  | 0  | Low-quality | 14.75 |
| Sample_T10A_k141_64446  | 5030  | 15 | 1  | 0  | Low-quality | 14.74 |
| Sample_T6B_k141_184642  | 27176 | 30 | 1  | 3  | Low-quality | 14.74 |
| Sample_T3B_k141_94699   | 45696 | 45 | 3  | 10 | Low-quality | 14.73 |
| Sample_C12A_k141_98022  | 5206  | 8  | 2  | 0  | Low-quality | 14.73 |
| Sample_T10B_k141_70164  | 8823  | 16 | 5  | 0  | Low-quality | 14.73 |
| Sample_T12C_k141_110557 | 6495  | 14 | 3  | 0  | Low-quality | 14.73 |
| Sample_C4B_k141_212714  | 6388  | 7  | 1  | 0  | Low-quality | 14.72 |
| Sample_T2B_k141_136450  | 6713  | 5  | 3  | 0  | Low-quality | 14.72 |
| Sample_T8C_k141_26813   | 5699  | 9  | 5  | 0  | Low-quality | 14.72 |
| Sample_C3A_k141_124641  | 7895  | 3  | 0  | 1  | Low-quality | 14.71 |
| Sample_T12A_k141_254416 | 9100  | 4  | 1  | 0  | Low-quality | 14.71 |
| Sample_T8B_k141_85912   | 12787 | 15 | 1  | 5  | Low-quality | 14.71 |
| Sample_C13C_k141_32849  | 5745  | 12 | 0  | 0  | Low-quality | 14.71 |
| Sample_T12A_k141_306557 | 5894  | 11 | 5  | 0  | Low-quality | 14.71 |
| Sample_T12C_k141_35120  | 7579  | 15 | 2  | 0  | Low-quality | 14.71 |
| Sample_T15C_k141_51012  | 6124  | 9  | 1  | 0  | Low-quality | 14.71 |
| Sample_T4B_k141_371216  | 5104  | 6  | 2  | 0  | Low-quality | 14.71 |
| Sample_T10B_k141_21819  | 5057  | 10 | 0  | 0  | Low-quality | 14.7  |
| Sample_T12C_k141_19598  | 5945  | 15 | 4  | 0  | Low-quality | 14.7  |
| Sample_T3A_k141_72011   | 8796  | 12 | 0  | 0  | Low-quality | 14.69 |
| Sample_C12A_k141_106032 | 5319  | 11 | 0  | 0  | Low-quality | 14.69 |
| Sample_C14A_k141_170656 | 22337 | 24 | 6  | 0  | Low-quality | 14.69 |
| Sample_C1A_k141_4146    | 7116  | 10 | 0  | 0  | Low-quality | 14.68 |
| Sample_C2B_k141_285390  | 5424  | 11 | 2  | 0  | Low-quality | 14.68 |
| Sample_T12A_k141_57935  | 6883  | 12 | 11 | 0  | Low-quality | 14.68 |



|                                   |       |    |   |    |             |       |
|-----------------------------------|-------|----|---|----|-------------|-------|
| Sample_T11A_k141_13352            | 8203  | 11 | 4 | 1  | Low-quality | 14.67 |
| Sample_T5B_k141_6173              | 6313  | 7  | 0 | 1  | Low-quality | 14.67 |
| Sample_C10A_k141_122320           | 8075  | 17 | 2 | 1  | Low-quality | 14.67 |
| Sample_T10A_k141_170874           | 5887  | 9  | 0 | 0  | Low-quality | 14.67 |
| Sample_T10B_k141_115460           | 5729  | 4  | 0 | 1  | Low-quality | 14.66 |
| Sample_C12C_k141_3559             | 5204  | 9  | 6 | 0  | Low-quality | 14.66 |
| Sample_T5B_k141_3994              | 8284  | 11 | 2 | 2  | Low-quality | 14.66 |
| Sample_C1C_k141_123982            | 11173 | 5  | 0 | 1  | Low-quality | 14.65 |
| Sample_T4B_k141_271543            | 18063 | 15 | 1 | 9  | Low-quality | 14.65 |
| Sample_C8A_k141_130878            | 5214  | 6  | 5 | 0  | Low-quality | 14.65 |
| Sample_C8A_k141_81549             | 12212 | 10 | 1 | 0  | Low-quality | 14.65 |
| Sample_C5A_k141_272863            | 14554 | 9  | 0 | 5  | Low-quality | 14.64 |
| Sample_T2A_k141_193824            | 6806  | 7  | 0 | 0  | Low-quality | 14.64 |
| Sample_C7B_k141_120087            | 9066  | 19 | 1 | 0  | Low-quality | 14.64 |
| Sample_T13B_k141_181652           | 5836  | 12 | 1 | 0  | Low-quality | 14.64 |
| Sample_C14A_k141_487              | 11161 | 5  | 0 | 1  | Low-quality | 14.63 |
| Sample_C3A_k141_224722            | 11959 | 11 | 0 | 5  | Low-quality | 14.63 |
| Sample_T8B_k141_31944             | 5092  | 8  | 0 | 1  | Low-quality | 14.62 |
| Sample_C12B_k141_24598            | 7998  | 16 | 8 | 0  | Low-quality | 14.62 |
| Sample_C4C_k141_5010              | 5265  | 8  | 6 | 0  | Low-quality | 14.62 |
| Sample_T6B_k141_198785            | 11022 | 18 | 1 | 0  | Low-quality | 14.62 |
| Sample_C3B_k141_260493            | 26184 | 34 | 1 | 1  | Low-quality | 14.61 |
| Sample_T17C_k141_32668            | 6026  | 12 | 7 | 0  | Low-quality | 14.61 |
| Sample_T2A_k141_257691            | 6374  | 7  | 1 | 0  | Low-quality | 14.61 |
| Sample_T4B_k141_228890            | 6057  | 14 | 1 | 0  | Low-quality | 14.61 |
| Sample_C10B_k141_84557            | 5719  | 11 | 1 | 2  | Low-quality | 14.6  |
| Sample_C10A_k141_208124           | 5435  | 9  | 7 | 0  | Low-quality | 14.6  |
| Sample_C6B_k141_80064             | 6631  | 10 | 1 | 1  | Low-quality | 14.6  |
| Sample_T13C_k141_67362_fragment_3 | 22808 | 23 | 0 | 3  | Low-quality | 14.6  |
| Sample_T17B_k141_8093             | 5134  | 8  | 3 | 0  | Low-quality | 14.6  |
| Sample_T7B_k141_154099            | 6747  | 10 | 5 | 0  | Low-quality | 14.6  |
| Sample_T14A_k141_188911           | 17682 | 23 | 2 | 2  | Low-quality | 14.59 |
| Sample_C12B_k141_155455           | 6903  | 11 | 2 | 0  | Low-quality | 14.59 |
| Sample_C2B_k141_303645            | 5085  | 5  | 1 | 0  | Low-quality | 14.59 |
| Sample_C3A_k141_82265             | 6192  | 14 | 3 | 0  | Low-quality | 14.59 |
| Sample_C5B_k141_24207             | 10577 | 9  | 5 | 0  | Low-quality | 14.59 |
| Sample_T8A_k141_111019            | 9642  | 11 | 1 | 2  | Low-quality | 14.59 |
| Sample_C4C_k141_165701            | 27735 | 18 | 0 | 14 | Low-quality | 14.58 |
| Sample_T1A_k141_39020             | 6768  | 12 | 7 | 0  | Low-quality | 14.58 |

|                                    |       |    |    |    |             |       |
|------------------------------------|-------|----|----|----|-------------|-------|
| Sample_T11C_k141_17497             | 16550 | 19 | 0  | 4  | Low-quality | 14.57 |
| Sample_C2A_k141_128674             | 6694  | 9  | 8  | 0  | Low-quality | 14.57 |
| Sample_C3A_k141_27174_fragment_1   | 5967  | 8  | 5  | 0  | Low-quality | 14.57 |
| Sample_T16C_k141_69405             | 9542  | 9  | 0  | 1  | Low-quality | 14.57 |
| Sample_T17A_k141_40467             | 15485 | 18 | 0  | 6  | Low-quality | 14.56 |
| Sample_C10A_k141_341591            | 7663  | 9  | 1  | 0  | Low-quality | 14.56 |
| Sample_C2A_k141_241275             | 6232  | 10 | 0  | 0  | Low-quality | 14.56 |
| Sample_C3C_k141_69058              | 9325  | 11 | 1  | 0  | Low-quality | 14.56 |
| Sample_T15A_k141_66422             | 10474 | 6  | 0  | 3  | Low-quality | 14.55 |
| Sample_T5C_k141_79892              | 23225 | 19 | 1  | 5  | Low-quality | 14.55 |
| Sample_T6C_k141_107535             | 5612  | 4  | 4  | 0  | Low-quality | 14.55 |
| Sample_C11A_k141_9988              | 40088 | 39 | 0  | 35 | Low-quality | 14.54 |
| Sample_T4B_k141_179871             | 47633 | 49 | 1  | 30 | Low-quality | 14.54 |
| Sample_C10A_k141_94978_fragment_1  | 11090 | 20 | 2  | 0  | Low-quality | 14.54 |
| Sample_C2C_k141_45008              | 7655  | 15 | 4  | 0  | Low-quality | 14.54 |
| Sample_C4B_k141_210716             | 9739  | 11 | 4  | 1  | Low-quality | 14.54 |
| Sample_C8B_k141_31515              | 6764  | 14 | 3  | 0  | Low-quality | 14.54 |
| Sample_C3A_k141_95205              | 8700  | 7  | 0  | 1  | Low-quality | 14.53 |
| Sample_T3B_k141_174893             | 11879 | 15 | 0  | 2  | Low-quality | 14.53 |
| Sample_T11B_k141_175               | 8041  | 9  | 0  | 4  | Low-quality | 14.52 |
| Sample_C3B_k141_155820             | 5598  | 9  | 0  | 0  | Low-quality | 14.52 |
| Sample_T5B_k141_29217              | 5950  | 5  | 3  | 0  | Low-quality | 14.52 |
| Sample_C4C_k141_89048              | 11609 | 14 | 2  | 1  | Low-quality | 14.51 |
| Sample_T14A_k141_236222            | 7601  | 11 | 1  | 1  | Low-quality | 14.51 |
| Sample_C14C_k141_100925_fragment_1 | 12303 | 10 | 1  | 1  | Low-quality | 14.5  |
| Sample_C9C_k141_62486_fragment_1   | 12421 | 14 | 10 | 0  | Low-quality | 14.5  |
| Sample_C10B_k141_87857             | 9576  | 12 | 1  | 4  | Low-quality | 14.49 |
| Sample_C4B_k141_28711              | 15625 | 13 | 0  | 5  | Low-quality | 14.49 |
| Sample_T8C_k141_44120              | 7528  | 10 | 0  | 2  | Low-quality | 14.49 |
| Sample_C11A_k141_90997             | 8415  | 7  | 5  | 1  | Low-quality | 14.49 |
| Sample_C14A_k141_80890             | 6817  | 8  | 1  | 0  | Low-quality | 14.49 |
| Sample_C10C_k141_133172            | 8789  | 21 | 1  | 0  | Low-quality | 14.48 |
| Sample_T17B_k141_4241              | 11165 | 13 | 2  | 1  | Low-quality | 14.48 |
| Sample_T5A_k141_23965              | 14355 | 12 | 3  | 0  | Low-quality | 14.48 |
| Sample_T8A_k141_138630             | 6910  | 11 | 8  | 2  | Low-quality | 14.48 |
| Sample_T14A_k141_198608            | 7643  | 6  | 0  | 3  | Low-quality | 14.47 |
| Sample_T14B_k141_185734            | 8661  | 12 | 0  | 1  | Low-quality | 14.47 |
| Sample_C6B_k141_70922              | 8799  | 16 | 3  | 0  | Low-quality | 14.47 |
| Sample_T5C_k141_16578              | 8517  | 20 | 2  | 0  | Low-quality | 14.47 |

|                                   |       |    |   |    |             |       |
|-----------------------------------|-------|----|---|----|-------------|-------|
| Sample_C14C_k141_115757           | 8537  | 11 | 0 | 0  | Low-quality | 14.46 |
| Sample_C5B_k141_9814              | 10068 | 11 | 1 | 3  | Low-quality | 14.46 |
| Sample_T11B_k141_6145             | 5650  | 4  | 0 | 0  | Low-quality | 14.46 |
| Sample_T2C_k141_41572             | 8065  | 6  | 0 | 1  | Low-quality | 14.46 |
| Sample_C12A_k141_44325_fragment_1 | 7681  | 12 | 1 | 1  | Low-quality | 14.46 |
| Sample_C1C_k141_118933            | 5158  | 8  | 2 | 0  | Low-quality | 14.46 |
| Sample_T4B_k141_198943            | 8337  | 7  | 2 | 0  | Low-quality | 14.46 |
| Sample_T6A_k141_156912            | 21544 | 25 | 4 | 1  | Low-quality | 14.46 |
| Sample_C2C_k141_105348            | 6538  | 5  | 0 | 0  | Low-quality | 14.45 |
| Sample_T6C_k141_55572             | 25478 | 27 | 1 | 18 | Low-quality | 14.45 |
| Sample_T13A_k141_71260            | 6742  | 9  | 4 | 0  | Low-quality | 14.45 |
| Sample_C6B_k141_33931             | 11664 | 17 | 1 | 3  | Low-quality | 14.44 |
| Sample_T5C_k141_49133             | 10850 | 2  | 1 | 1  | Low-quality | 14.44 |
| Sample_T12A_k141_177152           | 7004  | 16 | 0 | 0  | Low-quality | 14.44 |
| Sample_T7A_k141_64884             | 5511  | 13 | 2 | 1  | Low-quality | 14.44 |
| Sample_T5B_k141_24569             | 10735 | 19 | 1 | 2  | Low-quality | 14.43 |
| Sample_C4B_k141_119522            | 6294  | 9  | 1 | 0  | Low-quality | 14.43 |
| Sample_T18B_k141_98613_fragment_1 | 11879 | 12 | 0 | 1  | Low-quality | 14.43 |
| Sample_C6C_k141_33152             | 5098  | 11 | 4 | 0  | Low-quality | 14.42 |
| Sample_C8B_k141_134379            | 6459  | 12 | 0 | 0  | Low-quality | 14.42 |
| Sample_T1C_k141_28256             | 6377  | 7  | 1 | 0  | Low-quality | 14.42 |
| Sample_T11B_k141_138210           | 10149 | 11 | 0 | 5  | Low-quality | 14.41 |
| Sample_C6C_k141_221538            | 5294  | 12 | 3 | 0  | Low-quality | 14.41 |
| Sample_T10A_k141_8255_fragment_2  | 12081 | 18 | 5 | 0  | Low-quality | 14.41 |
| Sample_T3B_k141_166150            | 8985  | 11 | 1 | 0  | Low-quality | 14.41 |
| Sample_T8C_k141_23778             | 6069  | 14 | 4 | 0  | Low-quality | 14.41 |
| Sample_C10A_k141_94114            | 7025  | 8  | 1 | 0  | Low-quality | 14.4  |
| Sample_C2B_k141_66885             | 13695 | 19 | 1 | 9  | Low-quality | 14.4  |
| Sample_T4B_k141_211694            | 6053  | 5  | 0 | 5  | Low-quality | 14.4  |
| Sample_T12A_k141_302204           | 5686  | 6  | 2 | 0  | Low-quality | 14.4  |
| Sample_C12A_k141_152185           | 26021 | 21 | 1 | 9  | Low-quality | 14.39 |
| Sample_C14C_k141_152419           | 5504  | 4  | 0 | 0  | Low-quality | 14.39 |
| Sample_C2C_k141_283501            | 18820 | 18 | 2 | 4  | Low-quality | 14.39 |
| Sample_C2B_k141_25835             | 5966  | 15 | 4 | 0  | Low-quality | 14.39 |
| Sample_T2B_k141_34700             | 7659  | 14 | 7 | 1  | Low-quality | 14.39 |
| Sample_T13B_k141_129107           | 65157 | 69 | 3 | 37 | Low-quality | 14.38 |
| Sample_C8A_k141_170833            | 6161  | 10 | 6 | 0  | Low-quality | 14.38 |
| Sample_T16C_k141_140803           | 5691  | 13 | 4 | 0  | Low-quality | 14.38 |
| Sample_T8B_k141_98210             | 8670  | 13 | 6 | 0  | Low-quality | 14.38 |

|                                   |       |    |    |    |             |       |
|-----------------------------------|-------|----|----|----|-------------|-------|
| Sample_C13A_k141_1510             | 9667  | 11 | 0  | 2  | Low-quality | 14.37 |
| Sample_C5A_k141_194454            | 6039  | 6  | 0  | 6  | Low-quality | 14.37 |
| Sample_T5B_k141_54449             | 6039  | 6  | 0  | 6  | Low-quality | 14.37 |
| Sample_C10C_k141_224077           | 6633  | 19 | 4  | 0  | Low-quality | 14.37 |
| Sample_C2C_k141_33162             | 24527 | 29 | 12 | 1  | Low-quality | 14.37 |
| Sample_T16B_k141_156366           | 25373 | 56 | 7  | 1  | Low-quality | 14.37 |
| Sample_T18A_k141_56701            | 5408  | 6  | 3  | 0  | Low-quality | 14.37 |
| Sample_C2B_k141_328542            | 10253 | 12 | 0  | 0  | Low-quality | 14.36 |
| Sample_C2C_k141_105395            | 11606 | 14 | 1  | 6  | Low-quality | 14.36 |
| Sample_C4C_k141_863               | 8634  | 11 | 1  | 0  | Low-quality | 14.36 |
| Sample_T4B_k141_88522             | 24575 | 15 | 0  | 9  | Low-quality | 14.35 |
| Sample_C6B_k141_59023             | 8323  | 14 | 2  | 0  | Low-quality | 14.35 |
| Sample_T10A_k141_3199             | 9160  | 15 | 1  | 0  | Low-quality | 14.35 |
| Sample_T3A_k141_46477             | 5384  | 10 | 1  | 0  | Low-quality | 14.35 |
| Sample_T6B_k141_166737            | 8710  | 20 | 0  | 0  | Low-quality | 14.35 |
| Sample_C2A_k141_188264            | 11717 | 12 | 0  | 2  | Low-quality | 14.34 |
| Sample_C2C_k141_302809            | 5441  | 1  | 0  | 0  | Low-quality | 14.34 |
| Sample_T13C_k141_31614            | 8583  | 7  | 0  | 2  | Low-quality | 14.34 |
| Sample_T1C_k141_16798             | 25035 | 23 | 0  | 17 | Low-quality | 14.34 |
| Sample_T8B_k141_40441             | 6643  | 10 | 0  | 0  | Low-quality | 14.34 |
| Sample_T7A_k141_162490            | 5336  | 11 | 0  | 0  | Low-quality | 14.34 |
| Sample_C3C_k141_10966             | 8257  | 16 | 1  | 0  | Low-quality | 14.33 |
| Sample_T10C_k141_3143             | 18702 | 35 | 0  | 4  | Low-quality | 14.33 |
| Sample_T17B_k141_28523            | 14870 | 22 | 7  | 0  | Low-quality | 14.33 |
| Sample_T6A_k141_224684            | 11171 | 4  | 0  | 2  | Low-quality | 14.32 |
| Sample_C11A_k141_139528           | 6952  | 10 | 5  | 0  | Low-quality | 14.32 |
| Sample_C1B_k141_188680            | 7595  | 15 | 0  | 0  | Low-quality | 14.32 |
| Sample_T6B_k141_141411            | 9526  | 7  | 0  | 3  | Low-quality | 14.31 |
| Sample_C2A_k141_171427_fragment_1 | 10751 | 13 | 2  | 0  | Low-quality | 14.31 |
| Sample_T5A_k141_23932             | 7813  | 8  | 0  | 0  | Low-quality | 14.31 |
| Sample_T7A_k141_117869_fragment_1 | 10708 | 20 | 1  | 2  | Low-quality | 14.31 |
| Sample_C2B_k141_274808            | 5884  | 12 | 4  | 0  | Low-quality | 14.3  |
| Sample_C7A_k141_118062_fragment_1 | 11687 | 10 | 0  | 5  | Low-quality | 14.3  |
| Sample_C10B_k141_5747             | 29136 | 21 | 0  | 12 | Low-quality | 14.29 |
| Sample_C1B_k141_210000            | 8556  | 10 | 0  | 3  | Low-quality | 14.29 |
| Sample_C9B_k141_6622              | 6004  | 5  | 0  | 5  | Low-quality | 14.29 |
| Sample_T1C_k141_32408             | 25384 | 28 | 3  | 10 | Low-quality | 14.29 |
| Sample_C10A_k141_72659            | 8551  | 12 | 0  | 5  | Low-quality | 14.28 |
| Sample_C10A_k141_17816            | 22630 | 26 | 1  | 5  | Low-quality | 14.28 |

|                                   |       |    |    |   |             |       |
|-----------------------------------|-------|----|----|---|-------------|-------|
| Sample_T5B_k141_67982             | 8220  | 8  | 0  | 2 | Low-quality | 14.28 |
| Sample_C10A_k141_314807           | 9512  | 10 | 0  | 0 | Low-quality | 14.28 |
| Sample_C1C_k141_174704            | 6911  | 11 | 1  | 0 | Low-quality | 14.28 |
| Sample_C9C_k141_36418             | 9871  | 14 | 2  | 2 | Low-quality | 14.28 |
| Sample_T13B_k141_14369            | 6128  | 13 | 4  | 0 | Low-quality | 14.28 |
| Sample_T15A_k141_71748            | 25941 | 39 | 2  | 1 | Low-quality | 14.28 |
| Sample_T16B_k141_122983           | 6280  | 11 | 2  | 0 | Low-quality | 14.28 |
| Sample_T3C_k141_15016             | 9421  | 15 | 4  | 1 | Low-quality | 14.28 |
| Sample_T11C_k141_128415           | 8271  | 9  | 0  | 1 | Low-quality | 14.27 |
| Sample_T2A_k141_63794             | 17997 | 26 | 2  | 3 | Low-quality | 14.27 |
| Sample_C9B_k141_94372             | 6318  | 3  | 3  | 0 | Low-quality | 14.26 |
| Sample_T15B_k141_147714           | 17882 | 30 | 2  | 1 | Low-quality | 14.26 |
| Sample_C13C_k141_61718_fragment_1 | 5561  | 11 | 5  | 0 | Low-quality | 14.26 |
| Sample_C5C_k141_81641             | 7051  | 9  | 2  | 0 | Low-quality | 14.26 |
| Sample_C6B_k141_79691             | 7076  | 20 | 0  | 0 | Low-quality | 14.26 |
| Sample_T10A_k141_83761_fragment_1 | 6392  | 13 | 0  | 0 | Low-quality | 14.26 |
| Sample_T11B_k141_73666            | 6164  | 8  | 0  | 0 | Low-quality | 14.26 |
| Sample_T6C_k141_58195             | 12837 | 11 | 0  | 3 | Low-quality | 14.26 |
| Sample_C12A_k141_35487            | 5245  | 7  | 1  | 1 | Low-quality | 14.25 |
| Sample_C13A_k141_107703           | 23045 | 25 | 2  | 3 | Low-quality | 14.25 |
| Sample_C9A_k141_69730             | 5300  | 9  | 3  | 0 | Low-quality | 14.25 |
| Sample_C10C_k141_24408            | 5621  | 9  | 4  | 0 | Low-quality | 14.24 |
| Sample_T18A_k141_30592            | 11421 | 12 | 1  | 5 | Low-quality | 14.24 |
| Sample_C7A_k141_79942             | 11894 | 16 | 1  | 2 | Low-quality | 14.24 |
| Sample_T3C_k141_108631            | 6181  | 7  | 0  | 0 | Low-quality | 14.24 |
| Sample_T8C_k141_60646             | 7444  | 14 | 11 | 0 | Low-quality | 14.24 |
| Sample_C10A_k141_33806            | 5238  | 6  | 2  | 0 | Low-quality | 14.23 |
| Sample_C3B_k141_152498            | 6683  | 11 | 3  | 0 | Low-quality | 14.23 |
| Sample_T4B_k141_145521            | 24899 | 34 | 8  | 2 | Low-quality | 14.23 |
| Sample_C4A_k141_143754            | 5234  | 10 | 4  | 0 | Low-quality | 14.22 |
| Sample_T3B_k141_99308             | 7075  | 11 | 8  | 0 | Low-quality | 14.22 |
| Sample_T6A_k141_242453            | 5531  | 7  | 3  | 0 | Low-quality | 14.22 |
| Sample_C13A_k141_29190            | 7859  | 10 | 0  | 2 | Low-quality | 14.21 |
| Sample_C1C_k141_16061             | 6368  | 11 | 3  | 1 | Low-quality | 14.21 |
| Sample_T12A_k141_9092             | 5833  | 12 | 1  | 0 | Low-quality | 14.21 |
| Sample_T8C_k141_77304_fragment_2  | 23266 | 21 | 2  | 2 | Low-quality | 14.21 |
| Sample_T13A_k141_126240           | 8696  | 10 | 0  | 2 | Low-quality | 14.2  |
| Sample_C1B_k141_232682            | 11985 | 14 | 3  | 0 | Low-quality | 14.2  |
| Sample_T12A_k141_161714           | 34626 | 36 | 10 | 0 | Low-quality | 14.2  |

|                                   |       |    |   |    |             |       |
|-----------------------------------|-------|----|---|----|-------------|-------|
| Sample_T2A_k141_235261            | 6395  | 13 | 7 | 0  | Low-quality | 14.2  |
| Sample_T5C_k141_8938              | 5627  | 9  | 4 | 0  | Low-quality | 14.2  |
| Sample_T6A_k141_79318             | 5422  | 7  | 3 | 0  | Low-quality | 14.2  |
| Sample_C1A_k141_202205            | 16659 | 16 | 0 | 14 | Low-quality | 14.19 |
| Sample_C9B_k141_2967              | 10004 | 12 | 0 | 4  | Low-quality | 14.19 |
| Sample_T11B_k141_153944           | 9376  | 12 | 1 | 2  | Low-quality | 14.19 |
| Sample_T18B_k141_123882           | 11387 | 11 | 1 | 6  | Low-quality | 14.19 |
| Sample_T4B_k141_300134            | 21359 | 19 | 0 | 13 | Low-quality | 14.19 |
| Sample_C10A_k141_318946           | 8476  | 17 | 4 | 0  | Low-quality | 14.19 |
| Sample_C2A_k141_14214             | 5773  | 9  | 1 | 0  | Low-quality | 14.19 |
| Sample_T14C_k141_148171           | 9457  | 18 | 0 | 0  | Low-quality | 14.19 |
| Sample_T14C_k141_27283            | 12282 | 5  | 1 | 1  | Low-quality | 14.18 |
| Sample_C11A_k141_113301           | 8360  | 10 | 1 | 1  | Low-quality | 14.18 |
| Sample_C2B_k141_131161_fragment_2 | 6687  | 11 | 3 | 0  | Low-quality | 14.17 |
| Sample_C3C_k141_209580_fragment_1 | 6061  | 9  | 2 | 0  | Low-quality | 14.17 |
| Sample_C3C_k141_138678            | 8988  | 5  | 0 | 0  | Low-quality | 14.16 |
| Sample_T13B_k141_44019            | 8968  | 9  | 0 | 2  | Low-quality | 14.16 |
| Sample_T8C_k141_89343             | 8462  | 8  | 0 | 1  | Low-quality | 14.16 |
| Sample_C10C_k141_72499            | 5802  | 10 | 6 | 0  | Low-quality | 14.16 |
| Sample_C6A_k141_179444_fragment_1 | 5476  | 11 | 3 | 0  | Low-quality | 14.16 |
| Sample_T2C_k141_136669            | 12611 | 13 | 1 | 2  | Low-quality | 14.16 |
| Sample_T7A_k141_6530              | 9353  | 7  | 1 | 1  | Low-quality | 14.15 |
| Sample_T8A_k141_177202            | 7054  | 8  | 3 | 1  | Low-quality | 14.15 |
| Sample_T10A_k141_179421           | 6000  | 7  | 1 | 0  | Low-quality | 14.15 |
| Sample_C3C_k141_219246            | 5072  | 4  | 0 | 1  | Low-quality | 14.14 |
| Sample_T2C_k141_68129             | 5497  | 9  | 1 | 0  | Low-quality | 14.14 |
| Sample_T3A_k141_72140             | 15279 | 13 | 1 | 2  | Low-quality | 14.14 |
| Sample_C11A_k141_164904           | 6613  | 7  | 4 | 0  | Low-quality | 14.14 |
| Sample_C11C_k141_63683            | 11406 | 13 | 6 | 1  | Low-quality | 14.14 |
| Sample_C1C_k141_112981            | 5904  | 5  | 1 | 0  | Low-quality | 14.14 |
| Sample_C4C_k141_161327            | 7571  | 11 | 8 | 0  | Low-quality | 14.14 |
| Sample_T17A_k141_35878            | 11547 | 13 | 0 | 8  | Low-quality | 14.13 |
| Sample_C13C_k141_91412            | 7169  | 7  | 4 | 1  | Low-quality | 14.13 |
| Sample_T3A_k141_94733             | 15614 | 7  | 1 | 2  | Low-quality | 14.13 |
| Sample_T4B_k141_222020            | 6456  | 17 | 4 | 0  | Low-quality | 14.13 |
| Sample_T6A_k141_215277            | 19741 | 26 | 1 | 1  | Low-quality | 14.13 |
| Sample_T8C_k141_114363            | 8179  | 14 | 4 | 0  | Low-quality | 14.13 |
| Sample_T12A_k141_298385           | 12706 | 9  | 0 | 3  | Low-quality | 14.12 |
| Sample_T16B_k141_136035           | 5286  | 3  | 2 | 0  | Low-quality | 14.12 |

|                                    |       |    |   |    |             |       |
|------------------------------------|-------|----|---|----|-------------|-------|
| Sample_C12B_k141_93771             | 7160  | 18 | 1 | 0  | Low-quality | 14.12 |
| Sample_T15B_k141_54448             | 5936  | 9  | 1 | 0  | Low-quality | 14.12 |
| Sample_T8C_k141_93852              | 8446  | 8  | 0 | 2  | Low-quality | 14.11 |
| Sample_C3B_k141_58320              | 6645  | 9  | 2 | 0  | Low-quality | 14.11 |
| Sample_T16C_k141_83059             | 20407 | 34 | 4 | 1  | Low-quality | 14.11 |
| Sample_T2B_k141_161310             | 5552  | 9  | 3 | 0  | Low-quality | 14.11 |
| Sample_C4C_k141_140009             | 9044  | 8  | 0 | 2  | Low-quality | 14.1  |
| Sample_C8A_k141_40642              | 7384  | 13 | 9 | 0  | Low-quality | 14.1  |
| Sample_T8B_k141_197289             | 10052 | 12 | 0 | 4  | Low-quality | 14.09 |
| Sample_C12A_k141_197202            | 7761  | 13 | 0 | 1  | Low-quality | 14.09 |
| Sample_T14A_k141_242540            | 9822  | 9  | 0 | 0  | Low-quality | 14.09 |
| Sample_T15B_k141_31545             | 5626  | 8  | 4 | 0  | Low-quality | 14.09 |
| Sample_T3C_k141_53849              | 8948  | 11 | 0 | 0  | Low-quality | 14.09 |
| Sample_T4C_k141_41143              | 5510  | 11 | 4 | 0  | Low-quality | 14.09 |
| Sample_T8B_k141_264147             | 9722  | 17 | 0 | 1  | Low-quality | 14.09 |
| Sample_C11B_k141_11231             | 50394 | 60 | 1 | 8  | Low-quality | 14.08 |
| Sample_C12C_k141_117141_fragment_2 | 12215 | 19 | 4 | 0  | Low-quality | 14.08 |
| Sample_C1A_k141_166182             | 6287  | 6  | 0 | 3  | Low-quality | 14.08 |
| Sample_C3A_k141_158056             | 5538  | 7  | 3 | 0  | Low-quality | 14.08 |
| Sample_T5A_k141_53720              | 6817  | 9  | 4 | 0  | Low-quality | 14.08 |
| Sample_C11B_k141_46037             | 8131  | 8  | 1 | 2  | Low-quality | 14.07 |
| Sample_C13B_k141_102741            | 29785 | 30 | 0 | 25 | Low-quality | 14.07 |
| Sample_T3C_k141_71950              | 8303  | 10 | 0 | 4  | Low-quality | 14.07 |
| Sample_T5C_k141_49726              | 7771  | 7  | 0 | 3  | Low-quality | 14.07 |
| Sample_C2C_k141_199336             | 6859  | 10 | 1 | 1  | Low-quality | 14.07 |
| Sample_T8C_k141_181843             | 8147  | 13 | 3 | 0  | Low-quality | 14.07 |
| Sample_C6B_k141_108863             | 36232 | 27 | 0 | 23 | Low-quality | 14.06 |
| Sample_C7A_k141_23153              | 44081 | 51 | 0 | 48 | Low-quality | 14.06 |
| Sample_C11A_k141_77542             | 6650  | 14 | 3 | 0  | Low-quality | 14.06 |
| Sample_C4A_k141_12768              | 6424  | 13 | 2 | 1  | Low-quality | 14.06 |
| Sample_T7A_k141_121869             | 5337  | 11 | 6 | 0  | Low-quality | 14.06 |
| Sample_T2C_k141_159051             | 10212 | 12 | 0 | 0  | Low-quality | 14.05 |
| Sample_T5C_k141_187924             | 20906 | 22 | 1 | 1  | Low-quality | 14.05 |
| Sample_T8A_k141_239617             | 7589  | 10 | 0 | 2  | Low-quality | 14.05 |
| Sample_C10C_k141_111861            | 5274  | 7  | 1 | 0  | Low-quality | 14.05 |
| Sample_C2A_k141_61106              | 5100  | 10 | 2 | 0  | Low-quality | 14.05 |
| Sample_T8B_k141_279031             | 5783  | 7  | 2 | 0  | Low-quality | 14.05 |
| Sample_C7B_k141_33025              | 5156  | 5  | 3 | 0  | Low-quality | 14.04 |
| Sample_T6C_k141_123816             | 8480  | 5  | 5 | 0  | Low-quality | 14.04 |

|                                  |       |    |    |    |             |       |
|----------------------------------|-------|----|----|----|-------------|-------|
| Sample_T8A_k141_29152            | 28242 | 23 | 1  | 20 | Low-quality | 14.03 |
| Sample_T5B_k141_33778            | 10295 | 7  | 0  | 1  | Low-quality | 14.03 |
| Sample_C5A_k141_207025           | 19115 | 17 | 1  | 4  | Low-quality | 14.02 |
| Sample_C8B_k141_107391           | 17772 | 18 | 2  | 3  | Low-quality | 14.02 |
| Sample_T8B_k141_184328           | 5213  | 9  | 3  | 0  | Low-quality | 14.02 |
| Sample_T8C_k141_13681            | 6100  | 12 | 10 | 0  | Low-quality | 14.02 |
| Sample_C5A_k141_103087           | 5034  | 7  | 2  | 0  | Low-quality | 14.01 |
| Sample_C7B_k141_94891            | 14961 | 12 | 0  | 2  | Low-quality | 14.01 |
| Sample_C11B_k141_155583          | 7388  | 11 | 7  | 0  | Low-quality | 14.01 |
| Sample_C1B_k141_180002           | 5004  | 7  | 2  | 0  | Low-quality | 14.01 |
| Sample_C5A_k141_114905           | 13926 | 34 | 0  | 0  | Low-quality | 14.01 |
| Sample_T11C_k141_59493           | 7658  | 14 | 3  | 1  | Low-quality | 14.01 |
| Sample_T2C_k141_79285_fragment_1 | 5768  | 9  | 1  | 1  | Low-quality | 14.01 |
| Sample_T4B_k141_353532           | 8242  | 13 | 5  | 0  | Low-quality | 14.01 |
| Sample_C8A_k141_90447            | 5239  | 4  | 0  | 0  | Low-quality | 14    |
| Sample_T2B_k141_135483           | 10508 | 14 | 0  | 2  | Low-quality | 14    |
| Sample_C3A_k141_147631           | 5873  | 6  | 1  | 0  | Low-quality | 14    |
| Sample_T14B_k141_166002          | 6812  | 9  | 5  | 0  | Low-quality | 14    |
| Sample_T6B_k141_23846            | 5118  | 6  | 0  | 0  | Low-quality | 14    |
| Sample_T4B_k141_364271           | 6333  | 16 | 1  | 0  | Low-quality | 13.99 |
| Sample_C10B_k141_69579           | 27068 | 30 | 3  | 7  | Low-quality | 13.98 |
| Sample_C12A_k141_39643           | 5722  | 8  | 0  | 4  | Low-quality | 13.98 |
| Sample_C2A_k141_111618           | 7922  | 9  | 0  | 4  | Low-quality | 13.98 |
| Sample_C4A_k141_36939            | 7676  | 11 | 0  | 2  | Low-quality | 13.98 |
| Sample_C10A_k141_149075          | 5471  | 6  | 1  | 0  | Low-quality | 13.98 |
| Sample_C11C_k141_116425          | 6582  | 14 | 1  | 0  | Low-quality | 13.98 |
| Sample_C8C_k141_58955            | 5549  | 4  | 3  | 0  | Low-quality | 13.98 |
| Sample_C11C_k141_50327           | 14584 | 9  | 1  | 2  | Low-quality | 13.97 |
| Sample_C11C_k141_27560           | 7779  | 13 | 5  | 0  | Low-quality | 13.97 |
| Sample_T11C_k141_117404          | 14005 | 8  | 0  | 2  | Low-quality | 13.96 |
| Sample_C14A_k141_156111          | 5638  | 8  | 2  | 0  | Low-quality | 13.96 |
| Sample_C1B_k141_220176           | 7313  | 6  | 1  | 0  | Low-quality | 13.96 |
| Sample_C3C_k141_164546           | 5507  | 8  | 4  | 0  | Low-quality | 13.96 |
| Sample_T15B_k141_25901           | 7563  | 13 | 6  | 0  | Low-quality | 13.96 |
| Sample_T5A_k141_518              | 10646 | 14 | 9  | 0  | Low-quality | 13.96 |
| Sample_C2C_k141_258082           | 6206  | 10 | 0  | 0  | Low-quality | 13.95 |
| Sample_T12A_k141_170042          | 5458  | 9  | 3  | 0  | Low-quality | 13.95 |
| Sample_C2B_k141_108339           | 12114 | 16 | 1  | 1  | Low-quality | 13.94 |
| Sample_T4B_k141_98274            | 9392  | 11 | 3  | 1  | Low-quality | 13.94 |



|                                    |       |    |   |   |             |       |
|------------------------------------|-------|----|---|---|-------------|-------|
| Sample_T2C_k141_95653              | 8125  | 13 | 3 | 1 | Low-quality | 13.93 |
| Sample_C1A_k141_228041             | 21951 | 19 | 0 | 4 | Low-quality | 13.93 |
| Sample_C2B_k141_166686             | 5964  | 12 | 4 | 0 | Low-quality | 13.93 |
| Sample_C8A_k141_876                | 5183  | 5  | 4 | 0 | Low-quality | 13.93 |
| Sample_T13B_k141_102896_fragment_2 | 9859  | 10 | 0 | 3 | Low-quality | 13.93 |
| Sample_T2A_k141_182864             | 6330  | 7  | 3 | 0 | Low-quality | 13.93 |
| Sample_C5A_k141_117409_fragment_1  | 15043 | 15 | 0 | 2 | Low-quality | 13.92 |
| Sample_T5C_k141_129467             | 7018  | 8  | 0 | 1 | Low-quality | 13.91 |
| Sample_C12B_k141_17304             | 8882  | 4  | 0 | 3 | Low-quality | 13.89 |
| Sample_C3A_k141_55911              | 25607 | 32 | 1 | 3 | Low-quality | 13.89 |
| Sample_C8A_k141_48721              | 11351 | 12 | 0 | 4 | Low-quality | 13.89 |
| Sample_T6A_k141_91918              | 8511  | 6  | 1 | 3 | Low-quality | 13.89 |
| Sample_T14B_k141_73419             | 5652  | 7  | 2 | 0 | Low-quality | 13.89 |
| Sample_T16B_k141_29981             | 9801  | 12 | 2 | 0 | Low-quality | 13.89 |
| Sample_T16C_k141_82823             | 6711  | 9  | 2 | 1 | Low-quality | 13.89 |
| Sample_T2A_k141_117570             | 6250  | 6  | 0 | 0 | Low-quality | 13.89 |
| Sample_C8B_k141_111397             | 10654 | 8  | 0 | 2 | Low-quality | 13.88 |
| Sample_C9C_k141_16662              | 8310  | 7  | 0 | 2 | Low-quality | 13.88 |
| Sample_T12C_k141_140627            | 9350  | 11 | 0 | 2 | Low-quality | 13.88 |
| Sample_T7C_k141_5410               | 5062  | 1  | 0 | 0 | Low-quality | 13.88 |
| Sample_C10A_k141_338266            | 5539  | 13 | 2 | 0 | Low-quality | 13.88 |
| Sample_C12B_k141_43952             | 5106  | 7  | 0 | 0 | Low-quality | 13.88 |
| Sample_T10B_k141_86560             | 6670  | 10 | 3 | 0 | Low-quality | 13.88 |
| Sample_T5B_k141_28080              | 5494  | 14 | 2 | 0 | Low-quality | 13.88 |
| Sample_C10A_k141_35956             | 5820  | 8  | 6 | 0 | Low-quality | 13.87 |
| Sample_C10A_k141_230136            | 8357  | 16 | 6 | 0 | Low-quality | 13.87 |
| Sample_C2C_k141_155023             | 5666  | 7  | 5 | 0 | Low-quality | 13.87 |
| Sample_C3A_k141_218002             | 6329  | 12 | 2 | 1 | Low-quality | 13.87 |
| Sample_C8B_k141_49611              | 8472  | 15 | 4 | 0 | Low-quality | 13.87 |
| Sample_T3B_k141_5160               | 5388  | 7  | 3 | 0 | Low-quality | 13.87 |
| Sample_T8B_k141_17988              | 8225  | 17 | 2 | 0 | Low-quality | 13.87 |
| Sample_C3B_k141_1373               | 6462  | 12 | 1 | 0 | Low-quality | 13.86 |
| Sample_C12B_k141_95712             | 11409 | 16 | 3 | 1 | Low-quality | 13.86 |
| Sample_T7A_k141_70996              | 5363  | 12 | 4 | 0 | Low-quality | 13.86 |
| Sample_C2A_k141_143611             | 11192 | 12 | 1 | 2 | Low-quality | 13.85 |
| Sample_T12B_k141_3913              | 10923 | 10 | 3 | 0 | Low-quality | 13.85 |
| Sample_T13C_k141_28974             | 13451 | 8  | 0 | 4 | Low-quality | 13.85 |
| Sample_C12A_k141_137097            | 5483  | 5  | 2 | 0 | Low-quality | 13.85 |
| Sample_T12C_k141_113230            | 6301  | 13 | 9 | 0 | Low-quality | 13.85 |

|                                   |       |    |    |    |             |       |
|-----------------------------------|-------|----|----|----|-------------|-------|
| Sample_T13C_k141_145199           | 5168  | 7  | 0  | 0  | Low-quality | 13.85 |
| Sample_C8C_k141_59145             | 10604 | 6  | 0  | 2  | Low-quality | 13.84 |
| Sample_C9C_k141_71966             | 5524  | 9  | 3  | 0  | Low-quality | 13.84 |
| Sample_T12A_k141_139429           | 9291  | 11 | 7  | 0  | Low-quality | 13.84 |
| Sample_T14C_k141_156787           | 7413  | 9  | 5  | 0  | Low-quality | 13.84 |
| Sample_C4C_k141_239283            | 7756  | 7  | 0  | 2  | Low-quality | 13.83 |
| Sample_T15C_k141_40461            | 42850 | 38 | 0  | 25 | Low-quality | 13.83 |
| Sample_T18C_k141_62244            | 25495 | 29 | 1  | 6  | Low-quality | 13.83 |
| Sample_C11B_k141_182845           | 6961  | 5  | 5  | 0  | Low-quality | 13.83 |
| Sample_T15C_k141_137453           | 10049 | 9  | 0  | 2  | Low-quality | 13.82 |
| Sample_C12B_k141_124224           | 6278  | 6  | 4  | 1  | Low-quality | 13.82 |
| Sample_C13A_k141_46210            | 6758  | 7  | 6  | 0  | Low-quality | 13.82 |
| Sample_C12A_k141_85303            | 15235 | 16 | 1  | 3  | Low-quality | 13.81 |
| Sample_C6C_k141_209923            | 8216  | 11 | 1  | 0  | Low-quality | 13.81 |
| Sample_T15C_k141_15120            | 7512  | 8  | 3  | 1  | Low-quality | 13.81 |
| Sample_T17B_k141_37008            | 6498  | 4  | 0  | 0  | Low-quality | 13.81 |
| Sample_T3B_k141_148724_fragment_2 | 18943 | 15 | 3  | 3  | Low-quality | 13.81 |
| Sample_T4C_k141_94307             | 5866  | 7  | 2  | 0  | Low-quality | 13.81 |
| Sample_T4B_k141_21961             | 7256  | 6  | 0  | 5  | Low-quality | 13.8  |
| Sample_C11B_k141_42496            | 6606  | 13 | 6  | 0  | Low-quality | 13.8  |
| Sample_T2A_k141_117499            | 5208  | 9  | 5  | 0  | Low-quality | 13.8  |
| Sample_T8B_k141_79679             | 5609  | 11 | 4  | 0  | Low-quality | 13.8  |
| Sample_T4A_k141_63078             | 9246  | 12 | 0  | 1  | Low-quality | 13.79 |
| Sample_T5C_k141_125650            | 7692  | 5  | 0  | 1  | Low-quality | 13.79 |
| Sample_C8C_k141_152058            | 9527  | 12 | 2  | 0  | Low-quality | 13.79 |
| Sample_C8C_k141_156904            | 6215  | 6  | 1  | 0  | Low-quality | 13.79 |
| Sample_T8C_k141_59432             | 5194  | 11 | 3  | 1  | Low-quality | 13.79 |
| Sample_C7A_k141_149207            | 14726 | 14 | 1  | 3  | Low-quality | 13.78 |
| Sample_C10A_k141_184269           | 20968 | 25 | 4  | 0  | Low-quality | 13.78 |
| Sample_C9C_k141_39925             | 6476  | 12 | 10 | 0  | Low-quality | 13.78 |
| Sample_T13C_k141_20938_fragment_2 | 23796 | 49 | 4  | 1  | Low-quality | 13.78 |
| Sample_T14C_k141_94402            | 11348 | 11 | 7  | 1  | Low-quality | 13.78 |
| Sample_C7A_k141_10776             | 6924  | 12 | 0  | 2  | Low-quality | 13.77 |
| Sample_C12B_k141_50594            | 5025  | 5  | 3  | 0  | Low-quality | 13.77 |
| Sample_T12B_k141_46304            | 5058  | 6  | 4  | 0  | Low-quality | 13.77 |
| Sample_T3A_k141_47067             | 5330  | 8  | 7  | 0  | Low-quality | 13.77 |
| Sample_C11A_k141_41323            | 11527 | 21 | 5  | 0  | Low-quality | 13.76 |
| Sample_C11C_k141_182613           | 6158  | 8  | 4  | 0  | Low-quality | 13.76 |
| Sample_C13C_k141_91124            | 7194  | 16 | 10 | 0  | Low-quality | 13.76 |

|                                    |       |    |   |    |             |       |
|------------------------------------|-------|----|---|----|-------------|-------|
| Sample_C9A_k141_79769              | 7667  | 6  | 0 | 2  | Low-quality | 13.75 |
| Sample_T14A_k141_11356             | 8551  | 10 | 6 | 0  | Low-quality | 13.75 |
| Sample_T4B_k141_30558              | 5832  | 6  | 1 | 0  | Low-quality | 13.75 |
| Sample_C10B_k141_49175             | 6386  | 6  | 0 | 0  | Low-quality | 13.74 |
| Sample_T10C_k141_28855             | 5142  | 7  | 0 | 1  | Low-quality | 13.74 |
| Sample_T4A_k141_2283               | 5117  | 4  | 0 | 1  | Low-quality | 13.74 |
| Sample_T4B_k141_273686             | 9799  | 7  | 0 | 3  | Low-quality | 13.74 |
| Sample_C2B_k141_171774             | 16658 | 18 | 2 | 3  | Low-quality | 13.74 |
| Sample_T2C_k141_149409             | 11757 | 15 | 2 | 0  | Low-quality | 13.74 |
| Sample_C3A_k141_156553             | 7976  | 15 | 1 | 0  | Low-quality | 13.73 |
| Sample_C10C_k141_178350            | 7923  | 12 | 1 | 0  | Low-quality | 13.73 |
| Sample_T2C_k141_164200             | 5768  | 6  | 0 | 5  | Low-quality | 13.72 |
| Sample_C1C_k141_128527             | 6183  | 9  | 5 | 0  | Low-quality | 13.72 |
| Sample_C3A_k141_240795             | 5195  | 6  | 1 | 0  | Low-quality | 13.72 |
| Sample_C7A_k141_3632               | 7549  | 14 | 0 | 1  | Low-quality | 13.72 |
| Sample_T14C_k141_34686             | 6181  | 5  | 3 | 0  | Low-quality | 13.72 |
| Sample_T18B_k141_49185             | 5454  | 14 | 3 | 0  | Low-quality | 13.72 |
| Sample_C2A_k141_189766             | 22708 | 25 | 1 | 3  | Low-quality | 13.71 |
| Sample_T12A_k141_287878            | 19992 | 19 | 0 | 17 | Low-quality | 13.71 |
| Sample_T1A_k141_11672              | 5412  | 6  | 3 | 0  | Low-quality | 13.71 |
| Sample_T5B_k141_42650_fragment_1   | 11208 | 9  | 1 | 3  | Low-quality | 13.71 |
| Sample_T16C_k141_84223             | 11208 | 13 | 1 | 2  | Low-quality | 13.7  |
| Sample_C9C_k141_27731              | 8112  | 10 | 6 | 0  | Low-quality | 13.7  |
| Sample_T7A_k141_97889              | 7558  | 9  | 1 | 1  | Low-quality | 13.7  |
| Sample_C9A_k141_50346              | 5207  | 5  | 0 | 4  | Low-quality | 13.69 |
| Sample_C10A_k141_119836_fragment_2 | 9139  | 11 | 1 | 2  | Low-quality | 13.69 |
| Sample_T14C_k141_28734             | 7977  | 11 | 0 | 1  | Low-quality | 13.68 |
| Sample_C1A_k141_79849              | 5516  | 6  | 4 | 0  | Low-quality | 13.68 |
| Sample_C8C_k141_109917             | 24459 | 41 | 3 | 1  | Low-quality | 13.68 |
| Sample_C5A_k141_226784             | 8649  | 14 | 0 | 3  | Low-quality | 13.67 |
| Sample_C14C_k141_146328            | 7277  | 11 | 3 | 0  | Low-quality | 13.67 |
| Sample_C3A_k141_84987              | 5476  | 6  | 1 | 0  | Low-quality | 13.67 |
| Sample_T4C_k141_123035_fragment_1  | 7123  | 12 | 1 | 2  | Low-quality | 13.67 |
| Sample_T8C_k141_199639             | 11176 | 12 | 0 | 3  | Low-quality | 13.67 |
| Sample_C4A_k141_162939             | 5906  | 7  | 1 | 0  | Low-quality | 13.66 |
| Sample_T17A_k141_6614              | 5006  | 6  | 3 | 0  | Low-quality | 13.66 |
| Sample_C13B_k141_100179            | 25174 | 25 | 1 | 13 | Low-quality | 13.65 |
| Sample_C4A_k141_124393             | 27062 | 28 | 0 | 23 | Low-quality | 13.65 |
| Sample_T10A_k141_86893             | 15451 | 11 | 0 | 2  | Low-quality | 13.65 |

|                                    |       |    |    |    |             |       |
|------------------------------------|-------|----|----|----|-------------|-------|
| Sample_T7A_k141_112990             | 11077 | 13 | 1  | 4  | Low-quality | 13.65 |
| Sample_C10C_k141_151024_fragment_1 | 6072  | 11 | 5  | 0  | Low-quality | 13.65 |
| Sample_C12A_k141_133917            | 5439  | 7  | 1  | 0  | Low-quality | 13.65 |
| Sample_C1B_k141_116441             | 5320  | 13 | 4  | 0  | Low-quality | 13.65 |
| Sample_T18A_k141_182878            | 8327  | 10 | 2  | 0  | Low-quality | 13.65 |
| Sample_T12C_k141_98478             | 21188 | 23 | 1  | 8  | Low-quality | 13.64 |
| Sample_T5C_k141_127924             | 36562 | 37 | 2  | 10 | Low-quality | 13.64 |
| Sample_C2B_k141_69153              | 11076 | 20 | 1  | 0  | Low-quality | 13.64 |
| Sample_T11B_k141_150235            | 6343  | 6  | 0  | 1  | Low-quality | 13.64 |
| Sample_T12A_k141_146050            | 7586  | 13 | 0  | 3  | Low-quality | 13.63 |
| Sample_T15A_k141_163446            | 28355 | 25 | 0  | 21 | Low-quality | 13.63 |
| Sample_T7C_k141_45564              | 33243 | 37 | 4  | 0  | Low-quality | 13.63 |
| Sample_C14A_k141_24500             | 14306 | 14 | 0  | 10 | Low-quality | 13.62 |
| Sample_C3A_k141_58545              | 25116 | 24 | 1  | 4  | Low-quality | 13.62 |
| Sample_T10A_k141_139244            | 5854  | 7  | 5  | 0  | Low-quality | 13.62 |
| Sample_T14C_k141_39965             | 5222  | 7  | 1  | 0  | Low-quality | 13.62 |
| Sample_T2A_k141_55812              | 23662 | 25 | 11 | 1  | Low-quality | 13.62 |
| Sample_C6C_k141_80893              | 24879 | 34 | 1  | 19 | Low-quality | 13.61 |
| Sample_C1C_k141_78361              | 5977  | 6  | 1  | 0  | Low-quality | 13.61 |
| Sample_C8B_k141_36444              | 7839  | 11 | 4  | 0  | Low-quality | 13.61 |
| Sample_T15C_k141_61432             | 24655 | 21 | 1  | 2  | Low-quality | 13.6  |
| Sample_C11C_k141_113226            | 5738  | 10 | 1  | 0  | Low-quality | 13.6  |
| Sample_T13A_k141_62510             | 8536  | 19 | 4  | 0  | Low-quality | 13.6  |
| Sample_T6A_k141_49233              | 5317  | 10 | 4  | 0  | Low-quality | 13.6  |
| Sample_C5A_k141_23603              | 6769  | 6  | 0  | 1  | Low-quality | 13.59 |
| Sample_T12B_k141_62225             | 5588  | 4  | 0  | 1  | Low-quality | 13.59 |
| Sample_T15C_k141_131505            | 8138  | 11 | 0  | 2  | Low-quality | 13.59 |
| Sample_T5B_k141_67032              | 5713  | 5  | 0  | 4  | Low-quality | 13.59 |
| Sample_T17B_k141_36498             | 6007  | 8  | 1  | 0  | Low-quality | 13.59 |
| Sample_T2B_k141_117536             | 5216  | 14 | 0  | 0  | Low-quality | 13.59 |
| Sample_T3A_k141_54097              | 6570  | 10 | 2  | 1  | Low-quality | 13.59 |
| Sample_T8B_k141_43883              | 8138  | 12 | 0  | 0  | Low-quality | 13.59 |
| Sample_T13A_k141_15799             | 5496  | 6  | 0  | 2  | Low-quality | 13.58 |
| Sample_T16C_k141_125827            | 8367  | 13 | 0  | 2  | Low-quality | 13.58 |
| Sample_C10B_k141_132855            | 5205  | 12 | 2  | 0  | Low-quality | 13.58 |
| Sample_C8B_k141_23653              | 5465  | 9  | 1  | 0  | Low-quality | 13.58 |
| Sample_C8C_k141_64448              | 5390  | 10 | 1  | 0  | Low-quality | 13.58 |
| Sample_T17A_k141_22436_fragment_1  | 8237  | 15 | 6  | 2  | Low-quality | 13.58 |
| Sample_T3A_k141_2166               | 8023  | 12 | 2  | 0  | Low-quality | 13.58 |

|                                  |       |    |   |    |             |       |
|----------------------------------|-------|----|---|----|-------------|-------|
| Sample_T8A_k141_246105           | 6367  | 10 | 5 | 0  | Low-quality | 13.58 |
| Sample_T7A_k141_139281           | 10022 | 14 | 0 | 4  | Low-quality | 13.57 |
| Sample_C3A_k141_97457            | 13739 | 10 | 0 | 3  | Low-quality | 13.56 |
| Sample_C3B_k141_69381            | 8136  | 19 | 1 | 0  | Low-quality | 13.56 |
| Sample_C4B_k141_181012           | 9693  | 10 | 1 | 1  | Low-quality | 13.56 |
| Sample_C4C_k141_195647           | 7284  | 16 | 4 | 0  | Low-quality | 13.56 |
| Sample_C12A_k141_208292          | 5157  | 3  | 0 | 3  | Low-quality | 13.55 |
| Sample_C13C_k141_92866           | 8954  | 12 | 1 | 2  | Low-quality | 13.55 |
| Sample_C2C_k141_21443            | 5165  | 5  | 0 | 3  | Low-quality | 13.55 |
| Sample_T16A_k141_104074          | 5392  | 10 | 2 | 0  | Low-quality | 13.55 |
| Sample_C4A_k141_5728             | 8871  | 9  | 0 | 2  | Low-quality | 13.54 |
| Sample_T14A_k141_26374           | 12187 | 10 | 0 | 1  | Low-quality | 13.54 |
| Sample_T12A_k141_278863          | 21799 | 28 | 2 | 0  | Low-quality | 13.54 |
| Sample_T13B_k141_11631           | 7884  | 11 | 3 | 0  | Low-quality | 13.54 |
| Sample_C11C_k141_9337            | 6038  | 5  | 0 | 3  | Low-quality | 13.53 |
| Sample_C3B_k141_98683            | 17747 | 24 | 0 | 2  | Low-quality | 13.53 |
| Sample_T11B_k141_68272           | 5060  | 3  | 3 | 0  | Low-quality | 13.53 |
| Sample_C8A_k141_39034            | 5526  | 11 | 0 | 0  | Low-quality | 13.53 |
| Sample_C14C_k141_102264          | 10924 | 15 | 1 | 0  | Low-quality | 13.52 |
| Sample_C8B_k141_88840            | 8551  | 4  | 0 | 1  | Low-quality | 13.52 |
| Sample_T12A_k141_35649           | 17632 | 16 | 0 | 12 | Low-quality | 13.52 |
| Sample_C14B_k141_100279          | 12820 | 7  | 2 | 1  | Low-quality | 13.52 |
| Sample_T12A_k141_142022          | 5015  | 4  | 1 | 0  | Low-quality | 13.52 |
| Sample_T16B_k141_169709          | 5817  | 10 | 6 | 0  | Low-quality | 13.52 |
| Sample_T8A_k141_90244            | 10365 | 16 | 3 | 0  | Low-quality | 13.52 |
| Sample_T13C_k141_40687           | 5607  | 6  | 0 | 0  | Low-quality | 13.51 |
| Sample_C7A_k141_11144            | 7239  | 8  | 0 | 0  | Low-quality | 13.51 |
| Sample_T13B_k141_101355          | 8946  | 14 | 1 | 1  | Low-quality | 13.51 |
| Sample_C1C_k141_62216            | 8082  | 11 | 0 | 2  | Low-quality | 13.5  |
| Sample_C8C_k141_92956_fragment_1 | 11681 | 16 | 1 | 3  | Low-quality | 13.5  |
| Sample_T1B_k141_16456            | 7606  | 9  | 1 | 0  | Low-quality | 13.5  |
| Sample_T7B_k141_64192            | 14963 | 14 | 1 | 3  | Low-quality | 13.5  |
| Sample_C10C_k141_216480          | 6417  | 6  | 0 | 2  | Low-quality | 13.49 |
| Sample_T10C_k141_55412           | 8830  | 9  | 0 | 8  | Low-quality | 13.49 |
| Sample_C2C_k141_147957           | 9144  | 9  | 0 | 1  | Low-quality | 13.49 |
| Sample_C3A_k141_199074           | 15834 | 34 | 8 | 0  | Low-quality | 13.49 |
| Sample_T4C_k141_115461           | 6378  | 7  | 4 | 0  | Low-quality | 13.49 |
| Sample_T7A_k141_208447           | 7426  | 14 | 6 | 0  | Low-quality | 13.49 |
| Sample_C12C_k141_65024           | 5502  | 8  | 2 | 1  | Low-quality | 13.48 |

|                                   |       |    |   |    |             |       |
|-----------------------------------|-------|----|---|----|-------------|-------|
| Sample_T1A_k141_41539             | 6577  | 6  | 1 | 0  | Low-quality | 13.48 |
| Sample_T14B_k141_79537            | 6789  | 13 | 2 | 1  | Low-quality | 13.48 |
| Sample_T7B_k141_79113             | 5288  | 10 | 2 | 0  | Low-quality | 13.48 |
| Sample_C3A_k141_229529            | 7639  | 13 | 1 | 1  | Low-quality | 13.47 |
| Sample_C5A_k141_76967             | 21016 | 22 | 1 | 9  | Low-quality | 13.47 |
| Sample_C7A_k141_8948              | 11012 | 11 | 0 | 4  | Low-quality | 13.47 |
| Sample_C7B_k141_165184            | 16221 | 13 | 0 | 3  | Low-quality | 13.47 |
| Sample_C9A_k141_108781            | 23721 | 45 | 2 | 0  | Low-quality | 13.46 |
| Sample_C2B_k141_3896              | 12414 | 29 | 3 | 1  | Low-quality | 13.46 |
| Sample_T11C_k141_102088           | 9020  | 9  | 4 | 0  | Low-quality | 13.46 |
| Sample_C11A_k141_165905           | 6693  | 12 | 8 | 0  | Low-quality | 13.45 |
| Sample_T13B_k141_170622           | 8130  | 5  | 1 | 0  | Low-quality | 13.45 |
| Sample_C10B_k141_85504            | 20772 | 20 | 1 | 3  | Low-quality | 13.44 |
| Sample_C12B_k141_105683           | 6532  | 4  | 0 | 0  | Low-quality | 13.44 |
| Sample_C10A_k141_326784           | 7280  | 10 | 5 | 0  | Low-quality | 13.44 |
| Sample_C5A_k141_222348_fragment_1 | 10246 | 15 | 2 | 2  | Low-quality | 13.44 |
| Sample_C8B_k141_171442            | 5467  | 9  | 0 | 2  | Low-quality | 13.44 |
| Sample_T12A_k141_322514           | 5558  | 6  | 2 | 0  | Low-quality | 13.44 |
| Sample_T2B_k141_123244            | 6120  | 8  | 2 | 0  | Low-quality | 13.44 |
| Sample_T7C_k141_38774             | 6095  | 18 | 1 | 0  | Low-quality | 13.44 |
| Sample_C13A_k141_27745            | 5446  | 4  | 0 | 0  | Low-quality | 13.43 |
| Sample_C10C_k141_62357_fragment_1 | 5255  | 12 | 2 | 0  | Low-quality | 13.43 |
| Sample_C10A_k141_108322           | 13119 | 16 | 0 | 1  | Low-quality | 13.42 |
| Sample_C2B_k141_29515             | 12048 | 10 | 0 | 2  | Low-quality | 13.42 |
| Sample_T12C_k141_35737            | 21773 | 28 | 1 | 2  | Low-quality | 13.42 |
| Sample_T13B_k141_19965            | 22652 | 20 | 1 | 12 | Low-quality | 13.42 |
| Sample_C12A_k141_18613_fragment_1 | 13110 | 19 | 7 | 0  | Low-quality | 13.41 |
| Sample_C3A_k141_237739_fragment_1 | 19590 | 36 | 2 | 6  | Low-quality | 13.41 |
| Sample_T11C_k141_133246           | 6228  | 8  | 0 | 1  | Low-quality | 13.4  |
| Sample_T13C_k141_73410            | 14001 | 9  | 0 | 2  | Low-quality | 13.4  |
| Sample_C10C_k141_113715           | 8658  | 12 | 3 | 0  | Low-quality | 13.4  |
| Sample_C13A_k141_6904             | 6351  | 8  | 1 | 0  | Low-quality | 13.4  |
| Sample_T13B_k141_162641           | 6995  | 10 | 3 | 0  | Low-quality | 13.4  |
| Sample_T2B_k141_104539            | 14468 | 12 | 0 | 3  | Low-quality | 13.39 |
| Sample_T3A_k141_31246             | 10941 | 9  | 0 | 2  | Low-quality | 13.39 |
| Sample_T7A_k141_42305             | 9260  | 11 | 0 | 8  | Low-quality | 13.39 |
| Sample_C3A_k141_123700            | 5757  | 7  | 2 | 0  | Low-quality | 13.39 |
| Sample_C8B_k141_112738            | 7407  | 9  | 0 | 0  | Low-quality | 13.39 |
| Sample_T12A_k141_49933            | 5490  | 9  | 3 | 0  | Low-quality | 13.39 |

|                         |       |    |    |    |             |       |
|-------------------------|-------|----|----|----|-------------|-------|
| Sample_T2C_k141_36596   | 6440  | 7  | 0  | 1  | Low-quality | 13.39 |
| Sample_T5C_k141_48552   | 5377  | 6  | 5  | 0  | Low-quality | 13.39 |
| Sample_T6A_k141_39048   | 5458  | 6  | 4  | 0  | Low-quality | 13.39 |
| Sample_C14C_k141_121617 | 24964 | 25 | 1  | 19 | Low-quality | 13.38 |
| Sample_C11A_k141_124311 | 9131  | 12 | 4  | 0  | Low-quality | 13.38 |
| Sample_C12C_k141_77888  | 10057 | 6  | 0  | 2  | Low-quality | 13.38 |
| Sample_T10B_k141_87631  | 5320  | 10 | 7  | 0  | Low-quality | 13.38 |
| Sample_C10A_k141_29158  | 6291  | 4  | 1  | 0  | Low-quality | 13.36 |
| Sample_C3B_k141_69898   | 5342  | 8  | 2  | 1  | Low-quality | 13.36 |
| Sample_T17B_k141_34999  | 6732  | 13 | 6  | 0  | Low-quality | 13.36 |
| Sample_C10C_k141_44016  | 6836  | 7  | 0  | 2  | Low-quality | 13.35 |
| Sample_T11A_k141_51228  | 17557 | 18 | 0  | 11 | Low-quality | 13.35 |
| Sample_T13B_k141_7057   | 23309 | 17 | 0  | 14 | Low-quality | 13.35 |
| Sample_C4A_k141_85877   | 6287  | 6  | 4  | 0  | Low-quality | 13.35 |
| Sample_T10A_k141_90042  | 6217  | 9  | 3  | 0  | Low-quality | 13.35 |
| Sample_T17C_k141_18542  | 9083  | 15 | 2  | 2  | Low-quality | 13.35 |
| Sample_T7C_k141_129183  | 5045  | 9  | 0  | 0  | Low-quality | 13.35 |
| Sample_C7B_k141_122169  | 5180  | 14 | 4  | 0  | Low-quality | 13.34 |
| Sample_T12C_k141_80583  | 5762  | 7  | 1  | 3  | Low-quality | 13.34 |
| Sample_T16C_k141_78287  | 22864 | 20 | 1  | 14 | Low-quality | 13.34 |
| Sample_C6B_k141_173477  | 5477  | 5  | 4  | 0  | Low-quality | 13.34 |
| Sample_C8C_k141_25075   | 10475 | 12 | 0  | 1  | Low-quality | 13.34 |
| Sample_T4A_k141_88554   | 7058  | 9  | 2  | 0  | Low-quality | 13.34 |
| Sample_C10A_k141_220096 | 10896 | 11 | 0  | 3  | Low-quality | 13.33 |
| Sample_C10C_k141_179322 | 23930 | 28 | 2  | 8  | Low-quality | 13.33 |
| Sample_T11B_k141_5735   | 10071 | 15 | 0  | 2  | Low-quality | 13.33 |
| Sample_T11B_k141_11038  | 5602  | 6  | 0  | 6  | Low-quality | 13.33 |
| Sample_T12B_k141_119108 | 35512 | 36 | 1  | 6  | Low-quality | 13.33 |
| Sample_C8A_k141_590     | 6972  | 12 | 3  | 1  | Low-quality | 13.33 |
| Sample_C9B_k141_48821   | 6224  | 12 | 7  | 0  | Low-quality | 13.33 |
| Sample_T10B_k141_154907 | 19523 | 32 | 2  | 0  | Low-quality | 13.33 |
| Sample_T12C_k141_54641  | 9253  | 12 | 2  | 0  | Low-quality | 13.33 |
| Sample_T13B_k141_105919 | 6106  | 7  | 4  | 0  | Low-quality | 13.33 |
| Sample_T6C_k141_120056  | 5583  | 8  | 4  | 0  | Low-quality | 13.33 |
| Sample_C12C_k141_154416 | 9205  | 8  | 1  | 3  | Low-quality | 13.32 |
| Sample_T15C_k141_136455 | 23251 | 15 | 0  | 14 | Low-quality | 13.32 |
| Sample_T7A_k141_23559   | 7286  | 6  | 0  | 2  | Low-quality | 13.32 |
| Sample_C14C_k141_135486 | 6937  | 17 | 10 | 0  | Low-quality | 13.32 |
| Sample_C6B_k141_149611  | 8996  | 7  | 0  | 3  | Low-quality | 13.31 |

|                                    |       |    |   |    |             |       |
|------------------------------------|-------|----|---|----|-------------|-------|
| Sample_T17C_k141_35453             | 7766  | 8  | 0 | 0  | Low-quality | 13.31 |
| Sample_C2A_k141_255418             | 5566  | 14 | 3 | 0  | Low-quality | 13.31 |
| Sample_C10A_k141_184869            | 10788 | 11 | 1 | 0  | Low-quality | 13.3  |
| Sample_C13A_k141_42779             | 23645 | 23 | 0 | 5  | Low-quality | 13.3  |
| Sample_C2B_k141_116757             | 10866 | 10 | 0 | 3  | Low-quality | 13.3  |
| Sample_C3B_k141_54060              | 6829  | 10 | 0 | 1  | Low-quality | 13.3  |
| Sample_T5A_k141_58756              | 6589  | 5  | 0 | 4  | Low-quality | 13.3  |
| Sample_T5A_k141_56759              | 7597  | 13 | 1 | 0  | Low-quality | 13.3  |
| Sample_T8C_k141_160613             | 12992 | 27 | 4 | 1  | Low-quality | 13.3  |
| Sample_C5B_k141_62658              | 9622  | 13 | 0 | 0  | Low-quality | 13.29 |
| Sample_T2A_k141_225039             | 5971  | 11 | 5 | 0  | Low-quality | 13.29 |
| Sample_C3A_k141_96387              | 5154  | 9  | 2 | 0  | Low-quality | 13.28 |
| Sample_T11C_k141_129368_fragment_1 | 23790 | 30 | 1 | 1  | Low-quality | 13.28 |
| Sample_T12B_k141_150190            | 26653 | 51 | 3 | 0  | Low-quality | 13.28 |
| Sample_C12A_k141_86960             | 26143 | 26 | 0 | 4  | Low-quality | 13.27 |
| Sample_T4B_k141_344965             | 5586  | 11 | 0 | 1  | Low-quality | 13.27 |
| Sample_T6C_k141_78999              | 7106  | 11 | 3 | 0  | Low-quality | 13.27 |
| Sample_C11A_k141_28496             | 6252  | 6  | 3 | 0  | Low-quality | 13.27 |
| Sample_C13A_k141_65468             | 8841  | 18 | 3 | 1  | Low-quality | 13.27 |
| Sample_T12A_k141_342305            | 5426  | 8  | 1 | 0  | Low-quality | 13.27 |
| Sample_T5A_k141_37513              | 5419  | 9  | 4 | 0  | Low-quality | 13.27 |
| Sample_C3C_k141_52052              | 18818 | 18 | 1 | 6  | Low-quality | 13.26 |
| Sample_C14C_k141_172657            | 22006 | 27 | 8 | 12 | Low-quality | 13.25 |
| Sample_T16C_k141_75755             | 8360  | 13 | 1 | 3  | Low-quality | 13.25 |
| Sample_T6A_k141_61369              | 20996 | 18 | 1 | 14 | Low-quality | 13.25 |
| Sample_C1C_k141_3533               | 6209  | 8  | 2 | 0  | Low-quality | 13.25 |
| Sample_C2A_k141_290854             | 5511  | 5  | 3 | 0  | Low-quality | 13.25 |
| Sample_T12A_k141_293079            | 5340  | 6  | 3 | 0  | Low-quality | 13.25 |
| Sample_T7C_k141_92425              | 5421  | 9  | 1 | 1  | Low-quality | 13.24 |
| Sample_C5C_k141_31231              | 5571  | 7  | 4 | 0  | Low-quality | 13.24 |
| Sample_C9C_k141_41028              | 5847  | 11 | 3 | 1  | Low-quality | 13.24 |
| Sample_T10B_k141_82794             | 6054  | 5  | 3 | 0  | Low-quality | 13.24 |
| Sample_T18B_k141_148871_fragment_2 | 16188 | 13 | 5 | 3  | Low-quality | 13.24 |
| Sample_C13A_k141_95391             | 28009 | 26 | 0 | 23 | Low-quality | 13.23 |
| Sample_C7C_k141_36149              | 5592  | 10 | 0 | 0  | Low-quality | 13.23 |
| Sample_T2A_k141_139879             | 6118  | 8  | 4 | 1  | Low-quality | 13.23 |
| Sample_T8A_k141_78110              | 27250 | 22 | 3 | 1  | Low-quality | 13.23 |
| Sample_T11C_k141_156079            | 5224  | 6  | 0 | 2  | Low-quality | 13.22 |
| Sample_T12A_k141_324395            | 6932  | 9  | 3 | 0  | Low-quality | 13.22 |



|                                  |       |    |   |    |             |       |
|----------------------------------|-------|----|---|----|-------------|-------|
| Sample_C8B_k141_93241            | 9889  | 10 | 0 | 2  | Low-quality | 13.22 |
| Sample_C1C_k141_83872            | 8479  | 8  | 0 | 3  | Low-quality | 13.21 |
| Sample_C8C_k141_50242            | 15687 | 18 | 0 | 10 | Low-quality | 13.21 |
| Sample_T12B_k141_9616            | 5619  | 5  | 0 | 3  | Low-quality | 13.21 |
| Sample_C5C_k141_63636            | 5573  | 4  | 0 | 1  | Low-quality | 13.2  |
| Sample_C9A_k141_85303            | 5119  | 5  | 0 | 0  | Low-quality | 13.2  |
| Sample_C14A_k141_204073          | 5252  | 11 | 8 | 0  | Low-quality | 13.2  |
| Sample_T12A_k141_3359            | 9094  | 17 | 1 | 0  | Low-quality | 13.2  |
| Sample_C11A_k141_69209           | 23457 | 19 | 1 | 5  | Low-quality | 13.19 |
| Sample_C1A_k141_204627           | 20781 | 28 | 2 | 4  | Low-quality | 13.19 |
| Sample_C6B_k141_195510           | 6855  | 5  | 0 | 1  | Low-quality | 13.19 |
| Sample_T11B_k141_1631            | 13197 | 10 | 0 | 1  | Low-quality | 13.19 |
| Sample_C10C_k141_60226           | 5886  | 8  | 5 | 0  | Low-quality | 13.19 |
| Sample_C6C_k141_51735            | 8397  | 9  | 1 | 1  | Low-quality | 13.19 |
| Sample_C7A_k141_29863            | 5288  | 3  | 2 | 0  | Low-quality | 13.18 |
| Sample_C9B_k141_60031            | 6662  | 3  | 3 | 0  | Low-quality | 13.18 |
| Sample_T3C_k141_90523            | 21044 | 16 | 1 | 3  | Low-quality | 13.18 |
| Sample_T8B_k141_202983           | 5673  | 8  | 1 | 0  | Low-quality | 13.18 |
| Sample_C3A_k141_182316           | 5635  | 7  | 2 | 0  | Low-quality | 13.17 |
| Sample_C3B_k141_169504           | 14287 | 26 | 2 | 0  | Low-quality | 13.17 |
| Sample_T6C_k141_252564           | 5537  | 6  | 2 | 0  | Low-quality | 13.17 |
| Sample_T7A_k141_147131           | 5373  | 5  | 4 | 0  | Low-quality | 13.17 |
| Sample_T7B_k141_111763           | 5105  | 4  | 3 | 0  | Low-quality | 13.17 |
| Sample_C1B_k141_105453           | 5527  | 8  | 0 | 3  | Low-quality | 13.16 |
| Sample_T12A_k141_313941          | 21626 | 27 | 1 | 10 | Low-quality | 13.16 |
| Sample_C10A_k141_65535           | 7449  | 10 | 5 | 0  | Low-quality | 13.16 |
| Sample_C3B_k141_124360           | 7602  | 14 | 1 | 0  | Low-quality | 13.16 |
| Sample_C6A_k141_170982           | 5301  | 7  | 4 | 0  | Low-quality | 13.16 |
| Sample_T17C_k141_28710           | 6561  | 10 | 5 | 0  | Low-quality | 13.16 |
| Sample_C6B_k141_60869            | 35022 | 40 | 1 | 13 | Low-quality | 13.15 |
| Sample_C1C_k141_74268            | 5511  | 6  | 0 | 0  | Low-quality | 13.15 |
| Sample_C6B_k141_112398           | 6082  | 8  | 3 | 0  | Low-quality | 13.15 |
| Sample_C5A_k141_55955            | 6036  | 3  | 1 | 0  | Low-quality | 13.14 |
| Sample_C12A_k141_175042          | 5495  | 5  | 4 | 0  | Low-quality | 13.14 |
| Sample_T13B_k141_23493           | 8682  | 10 | 1 | 0  | Low-quality | 13.14 |
| Sample_C3A_k141_148617           | 7458  | 12 | 0 | 0  | Low-quality | 13.13 |
| Sample_C12B_k141_154224          | 5035  | 8  | 2 | 0  | Low-quality | 13.12 |
| Sample_C3C_k141_87556_fragment_1 | 5031  | 9  | 3 | 0  | Low-quality | 13.12 |
| Sample_C4C_k141_82219            | 5724  | 12 | 2 | 0  | Low-quality | 13.12 |

|                                  |       |    |    |    |             |       |
|----------------------------------|-------|----|----|----|-------------|-------|
| Sample_C3A_k141_87219            | 5550  | 8  | 4  | 0  | Low-quality | 13.11 |
| Sample_T14B_k141_8490            | 5509  | 9  | 2  | 0  | Low-quality | 13.11 |
| Sample_C10B_k141_121716          | 18485 | 13 | 0  | 11 | Low-quality | 13.1  |
| Sample_C12A_k141_45037           | 5779  | 7  | 3  | 0  | Low-quality | 13.1  |
| Sample_C13A_k141_59448           | 6300  | 17 | 2  | 0  | Low-quality | 13.1  |
| Sample_C5C_k141_87822            | 6782  | 12 | 1  | 1  | Low-quality | 13.1  |
| Sample_T12C_k141_98858           | 5614  | 8  | 3  | 0  | Low-quality | 13.09 |
| Sample_T17B_k141_35466           | 11886 | 15 | 3  | 0  | Low-quality | 13.09 |
| Sample_T5A_k141_38901            | 5498  | 14 | 3  | 0  | Low-quality | 13.09 |
| Sample_T8C_k141_23350            | 5471  | 15 | 10 | 0  | Low-quality | 13.09 |
| Sample_C10C_k141_114242          | 5323  | 6  | 5  | 0  | Low-quality | 13.08 |
| Sample_C4A_k141_18991            | 5659  | 7  | 3  | 0  | Low-quality | 13.08 |
| Sample_T12A_k141_207339          | 5506  | 10 | 5  | 0  | Low-quality | 13.08 |
| Sample_T13A_k141_62908           | 6986  | 19 | 5  | 0  | Low-quality | 13.08 |
| Sample_T13C_k141_95203           | 6461  | 11 | 8  | 0  | Low-quality | 13.08 |
| Sample_T7B_k141_46514_fragment_1 | 32488 | 39 | 2  | 7  | Low-quality | 13.08 |
| Sample_C9A_k141_92547            | 6375  | 9  | 0  | 2  | Low-quality | 13.07 |
| Sample_T4B_k141_90152            | 5690  | 8  | 0  | 1  | Low-quality | 13.07 |
| Sample_C12C_k141_77367           | 8749  | 15 | 1  | 1  | Low-quality | 13.07 |
| Sample_T17A_k141_25834           | 5555  | 8  | 2  | 0  | Low-quality | 13.07 |
| Sample_C4B_k141_256453           | 8384  | 8  | 0  | 3  | Low-quality | 13.06 |
| Sample_T10C_k141_13609           | 12922 | 13 | 0  | 2  | Low-quality | 13.06 |
| Sample_T1A_k141_37697            | 11756 | 11 | 0  | 2  | Low-quality | 13.06 |
| Sample_C5C_k141_104550           | 5129  | 9  | 0  | 0  | Low-quality | 13.06 |
| Sample_T15C_k141_57537           | 5419  | 4  | 0  | 0  | Low-quality | 13.06 |
| Sample_C6A_k141_201280           | 27994 | 34 | 2  | 16 | Low-quality | 13.05 |
| Sample_C6B_k141_96533            | 10669 | 11 | 1  | 2  | Low-quality | 13.05 |
| Sample_T10C_k141_35498           | 5485  | 5  | 0  | 5  | Low-quality | 13.05 |
| Sample_T6C_k141_142712           | 8898  | 10 | 1  | 1  | Low-quality | 13.05 |
| Sample_T8A_k141_164214           | 31693 | 38 | 1  | 7  | Low-quality | 13.05 |
| Sample_T4B_k141_307454           | 28724 | 27 | 3  | 11 | Low-quality | 13.04 |
| Sample_T8B_k141_60627            | 23369 | 18 | 1  | 2  | Low-quality | 13.04 |
| Sample_T10B_k141_143544          | 6990  | 11 | 5  | 0  | Low-quality | 13.04 |
| Sample_T7A_k141_53502            | 11224 | 10 | 0  | 0  | Low-quality | 13.04 |
| Sample_T8B_k141_114065           | 5404  | 7  | 5  | 0  | Low-quality | 13.03 |
| Sample_T8B_k141_70896            | 6548  | 13 | 2  | 0  | Low-quality | 13.03 |
| Sample_C13A_k141_21856           | 13284 | 12 | 2  | 1  | Low-quality | 13.02 |
| Sample_C14C_k141_86844           | 7557  | 13 | 2  | 0  | Low-quality | 13.02 |
| Sample_C3A_k141_62205            | 5849  | 10 | 1  | 0  | Low-quality | 13.02 |

|                                 |       |    |   |   |             |       |
|---------------------------------|-------|----|---|---|-------------|-------|
| Sample_T11B_k141_138014         | 9746  | 12 | 0 | 1 | Low-quality | 13.02 |
| Sample_T15A_k141_3165           | 10640 | 10 | 0 | 0 | Low-quality | 13.02 |
| Sample_T4C_k141_104534          | 5080  | 7  | 6 | 0 | Low-quality | 13.02 |
| Sample_T6A_k141_113283          | 5115  | 8  | 4 | 0 | Low-quality | 13.02 |
| Sample_C11B_k141_218471         | 6042  | 4  | 0 | 4 | Low-quality | 13.01 |
| Sample_C7B_k141_24018           | 20111 | 19 | 1 | 6 | Low-quality | 13.01 |
| Sample_T13A_k141_28826          | 8140  | 7  | 0 | 2 | Low-quality | 13.01 |
| Sample_T5B_k141_8398            | 28112 | 41 | 1 | 8 | Low-quality | 13.01 |
| Sample_C5A_k141_233468          | 8318  | 18 | 2 | 0 | Low-quality | 13.01 |
| Sample_C9B_k141_97192           | 12665 | 7  | 0 | 1 | Low-quality | 13    |
| Sample_C11A_k141_146679         | 8441  | 9  | 1 | 0 | Low-quality | 13    |
| Sample_C13B_k141_108074         | 8680  | 12 | 1 | 0 | Low-quality | 12.99 |
| Sample_T10B_k141_145155         | 16433 | 35 | 2 | 0 | Low-quality | 12.99 |
| Sample_T15C_k141_953_fragment_1 | 10496 | 20 | 1 | 0 | Low-quality | 12.99 |
| Sample_C2B_k141_24136           | 10738 | 13 | 1 | 1 | Low-quality | 12.98 |
| Sample_T17A_k141_36714          | 7771  | 11 | 0 | 3 | Low-quality | 12.98 |
| Sample_T7B_k141_24671           | 14046 | 10 | 0 | 2 | Low-quality | 12.98 |
| Sample_C12C_k141_147728         | 6530  | 8  | 3 | 0 | Low-quality | 12.98 |
| Sample_T12C_k141_184303         | 9954  | 21 | 0 | 0 | Low-quality | 12.98 |
| Sample_C5C_k141_43169           | 9783  | 10 | 0 | 7 | Low-quality | 12.97 |
| Sample_C1C_k141_82486           | 6954  | 8  | 6 | 0 | Low-quality | 12.97 |
| Sample_C12B_k141_105565         | 7566  | 7  | 0 | 0 | Low-quality | 12.96 |
| Sample_T6B_k141_35191           | 6305  | 4  | 0 | 0 | Low-quality | 12.96 |
| Sample_C2A_k141_264067          | 5187  | 12 | 1 | 0 | Low-quality | 12.96 |
| Sample_T17C_k141_22872          | 5948  | 13 | 3 | 0 | Low-quality | 12.96 |
| Sample_T5C_k141_177071          | 10155 | 6  | 0 | 2 | Low-quality | 12.96 |
| Sample_C2C_k141_235783          | 8199  | 8  | 0 | 0 | Low-quality | 12.95 |
| Sample_T16B_k141_149012         | 13630 | 13 | 3 | 3 | Low-quality | 12.95 |
| Sample_T2C_k141_259097          | 9034  | 10 | 0 | 1 | Low-quality | 12.95 |
| Sample_C4C_k141_121393          | 18829 | 22 | 1 | 3 | Low-quality | 12.95 |
| Sample_T6B_k141_201490          | 10364 | 14 | 3 | 2 | Low-quality | 12.95 |
| Sample_T7A_k141_204143          | 5829  | 12 | 3 | 1 | Low-quality | 12.95 |
| Sample_T8A_k141_215528          | 5922  | 5  | 4 | 0 | Low-quality | 12.95 |
| Sample_C10A_k141_156516         | 10212 | 11 | 0 | 2 | Low-quality | 12.94 |
| Sample_C10B_k141_19064          | 11634 | 12 | 0 | 3 | Low-quality | 12.93 |
| Sample_C6C_k141_1115            | 7739  | 11 | 0 | 1 | Low-quality | 12.93 |
| Sample_T2B_k141_281945          | 25593 | 20 | 1 | 4 | Low-quality | 12.93 |
| Sample_T7B_k141_37732           | 6001  | 18 | 2 | 1 | Low-quality | 12.93 |
| Sample_C9B_k141_26991           | 5808  | 11 | 3 | 0 | Low-quality | 12.93 |

|                                  |       |    |   |   |             |       |
|----------------------------------|-------|----|---|---|-------------|-------|
| Sample_T8B_k141_76826            | 6947  | 18 | 3 | 0 | Low-quality | 12.93 |
| Sample_T4B_k141_133111           | 5534  | 6  | 0 | 1 | Low-quality | 12.92 |
| Sample_T6C_k141_34132            | 7058  | 7  | 0 | 1 | Low-quality | 12.92 |
| Sample_C3C_k141_256576           | 7103  | 8  | 1 | 2 | Low-quality | 12.91 |
| Sample_C4B_k141_161389           | 15797 | 13 | 0 | 9 | Low-quality | 12.91 |
| Sample_T6A_k141_68526            | 8533  | 8  | 1 | 3 | Low-quality | 12.91 |
| Sample_C11C_k141_174042          | 21011 | 48 | 4 | 0 | Low-quality | 12.91 |
| Sample_C12C_k141_62338           | 12055 | 6  | 0 | 3 | Low-quality | 12.91 |
| Sample_T17B_k141_27230           | 11637 | 16 | 3 | 0 | Low-quality | 12.91 |
| Sample_T5B_k141_19476            | 6045  | 6  | 4 | 0 | Low-quality | 12.91 |
| Sample_T7C_k141_13617            | 7681  | 19 | 1 | 0 | Low-quality | 12.91 |
| Sample_T8B_k141_209530           | 6710  | 10 | 5 | 0 | Low-quality | 12.91 |
| Sample_T12A_k141_82425           | 5141  | 6  | 4 | 0 | Low-quality | 12.9  |
| Sample_T2A_k141_229847           | 11598 | 9  | 0 | 2 | Low-quality | 12.89 |
| Sample_C4C_k141_107741           | 5429  | 4  | 2 | 0 | Low-quality | 12.89 |
| Sample_C10C_k141_95529           | 6130  | 3  | 3 | 0 | Low-quality | 12.88 |
| Sample_C5A_k141_145369           | 5499  | 5  | 0 | 0 | Low-quality | 12.88 |
| Sample_C10C_k141_106642          | 6314  | 9  | 3 | 0 | Low-quality | 12.87 |
| Sample_T16B_k141_106259          | 7698  | 9  | 0 | 0 | Low-quality | 12.86 |
| Sample_C12B_k141_92644           | 6067  | 11 | 4 | 0 | Low-quality | 12.86 |
| Sample_T15B_k141_146491          | 6343  | 8  | 7 | 0 | Low-quality | 12.86 |
| Sample_T6A_k141_119455           | 9494  | 8  | 0 | 2 | Low-quality | 12.86 |
| Sample_T6A_k141_14426            | 13337 | 15 | 3 | 1 | Low-quality | 12.86 |
| Sample_T18C_k141_48840           | 23689 | 23 | 1 | 2 | Low-quality | 12.85 |
| Sample_T3C_k141_49516            | 5205  | 13 | 3 | 1 | Low-quality | 12.85 |
| Sample_T7B_k141_120888           | 17842 | 21 | 1 | 4 | Low-quality | 12.85 |
| Sample_C6B_k141_14819            | 8487  | 9  | 1 | 0 | Low-quality | 12.84 |
| Sample_T12B_k141_128771          | 5480  | 10 | 5 | 1 | Low-quality | 12.84 |
| Sample_T3B_k141_70974_fragment_1 | 9110  | 12 | 0 | 0 | Low-quality | 12.84 |
| Sample_T12A_k141_69858           | 5554  | 4  | 0 | 0 | Low-quality | 12.83 |
| Sample_C2A_k141_178972           | 10498 | 15 | 3 | 1 | Low-quality | 12.83 |
| Sample_C6C_k141_209882           | 6784  | 9  | 1 | 0 | Low-quality | 12.83 |
| Sample_T16C_k141_133185          | 12628 | 13 | 0 | 7 | Low-quality | 12.82 |
| Sample_T8C_k141_91111            | 8003  | 10 | 0 | 2 | Low-quality | 12.82 |
| Sample_T7A_k141_148334           | 5037  | 7  | 0 | 0 | Low-quality | 12.82 |
| Sample_C14C_k141_127229          | 15774 | 17 | 0 | 6 | Low-quality | 12.81 |
| Sample_T14A_k141_132488          | 13861 | 10 | 0 | 2 | Low-quality | 12.81 |
| Sample_T3A_k141_45552            | 5886  | 4  | 0 | 0 | Low-quality | 12.81 |
| Sample_T12B_k141_1775            | 5491  | 7  | 5 | 0 | Low-quality | 12.81 |

|                                   |       |    |   |    |             |       |
|-----------------------------------|-------|----|---|----|-------------|-------|
| Sample_T4B_k141_120955            | 7402  | 13 | 5 | 0  | Low-quality | 12.81 |
| Sample_C2B_k141_324561            | 5380  | 5  | 0 | 4  | Low-quality | 12.8  |
| Sample_C2B_k141_50857             | 9550  | 10 | 0 | 3  | Low-quality | 12.8  |
| Sample_T2A_k141_94493             | 9825  | 5  | 0 | 2  | Low-quality | 12.8  |
| Sample_C2C_k141_187859            | 5577  | 10 | 3 | 0  | Low-quality | 12.8  |
| Sample_C3C_k141_259376            | 5445  | 11 | 1 | 0  | Low-quality | 12.8  |
| Sample_C9A_k141_105938            | 5747  | 8  | 5 | 0  | Low-quality | 12.8  |
| Sample_T18B_k141_5737             | 7895  | 19 | 0 | 1  | Low-quality | 12.8  |
| Sample_T5B_k141_66019             | 5840  | 6  | 4 | 0  | Low-quality | 12.8  |
| Sample_T8C_k141_141896            | 14228 | 21 | 3 | 3  | Low-quality | 12.8  |
| Sample_T8C_k141_195169            | 5070  | 9  | 5 | 0  | Low-quality | 12.8  |
| Sample_C1B_k141_124546            | 24541 | 7  | 0 | 4  | Low-quality | 12.79 |
| Sample_C5B_k141_13231             | 5144  | 8  | 3 | 0  | Low-quality | 12.79 |
| Sample_C9A_k141_117340            | 6086  | 8  | 6 | 0  | Low-quality | 12.79 |
| Sample_C1C_k141_10084             | 5397  | 3  | 0 | 2  | Low-quality | 12.78 |
| Sample_T14B_k141_214475           | 9470  | 12 | 0 | 3  | Low-quality | 12.78 |
| Sample_T14B_k141_109461           | 13357 | 9  | 1 | 6  | Low-quality | 12.78 |
| Sample_C2B_k141_312995            | 10222 | 7  | 0 | 2  | Low-quality | 12.78 |
| Sample_C4B_k141_258313            | 6021  | 10 | 4 | 0  | Low-quality | 12.78 |
| Sample_T13C_k141_101220           | 6716  | 6  | 0 | 0  | Low-quality | 12.78 |
| Sample_T1A_k141_12594             | 10885 | 16 | 2 | 1  | Low-quality | 12.78 |
| Sample_C12B_k141_182604           | 8464  | 10 | 0 | 2  | Low-quality | 12.77 |
| Sample_C14C_k141_66068            | 19282 | 16 | 1 | 7  | Low-quality | 12.77 |
| Sample_C4B_k141_137265            | 5347  | 11 | 4 | 0  | Low-quality | 12.77 |
| Sample_T5C_k141_171399            | 7675  | 12 | 7 | 0  | Low-quality | 12.77 |
| Sample_C13A_k141_93836            | 5786  | 9  | 1 | 0  | Low-quality | 12.76 |
| Sample_C7A_k141_132881            | 9330  | 11 | 1 | 2  | Low-quality | 12.76 |
| Sample_T15A_k141_78626            | 8435  | 5  | 1 | 0  | Low-quality | 12.76 |
| Sample_T16B_k141_46782            | 37212 | 35 | 0 | 22 | Low-quality | 12.76 |
| Sample_C10A_k141_163828           | 5055  | 10 | 3 | 0  | Low-quality | 12.76 |
| Sample_C2A_k141_234194            | 5032  | 10 | 2 | 0  | Low-quality | 12.76 |
| Sample_T15C_k141_76470            | 6039  | 5  | 3 | 1  | Low-quality | 12.76 |
| Sample_T6B_k141_61198             | 5588  | 11 | 8 | 0  | Low-quality | 12.76 |
| Sample_T4C_k141_3792              | 9716  | 9  | 1 | 3  | Low-quality | 12.75 |
| Sample_C3C_k141_255986            | 8405  | 8  | 0 | 0  | Low-quality | 12.75 |
| Sample_T11B_k141_25664            | 6075  | 6  | 0 | 0  | Low-quality | 12.75 |
| Sample_T15B_k141_85956            | 6105  | 11 | 0 | 1  | Low-quality | 12.75 |
| Sample_T17A_k141_40130_fragment_1 | 7256  | 8  | 1 | 0  | Low-quality | 12.75 |
| Sample_T13A_k141_104999           | 5534  | 7  | 0 | 0  | Low-quality | 12.74 |

|                                   |       |    |   |    |             |       |
|-----------------------------------|-------|----|---|----|-------------|-------|
| Sample_C14A_k141_84796            | 5963  | 5  | 3 | 0  | Low-quality | 12.74 |
| Sample_C14B_k141_70564            | 6898  | 10 | 3 | 1  | Low-quality | 12.74 |
| Sample_T7C_k141_56737             | 5141  | 6  | 5 | 0  | Low-quality | 12.74 |
| Sample_T10B_k141_81790            | 5783  | 15 | 2 | 0  | Low-quality | 12.73 |
| Sample_C5C_k141_88255             | 20943 | 25 | 5 | 0  | Low-quality | 12.73 |
| Sample_C9A_k141_2953              | 5703  | 9  | 2 | 1  | Low-quality | 12.73 |
| Sample_C10A_k141_137540           | 23767 | 27 | 1 | 13 | Low-quality | 12.72 |
| Sample_T2B_k141_180106            | 8863  | 10 | 0 | 6  | Low-quality | 12.72 |
| Sample_T3B_k141_139885            | 5386  | 11 | 3 | 0  | Low-quality | 12.72 |
| Sample_T5B_k141_57250             | 10394 | 7  | 0 | 1  | Low-quality | 12.72 |
| Sample_T11B_k141_102864           | 5252  | 8  | 0 | 0  | Low-quality | 12.72 |
| Sample_C1B_k141_218449            | 6685  | 5  | 0 | 2  | Low-quality | 12.71 |
| Sample_T15A_k141_180983           | 11633 | 17 | 1 | 1  | Low-quality | 12.71 |
| Sample_T8A_k141_17170             | 33091 | 35 | 2 | 3  | Low-quality | 12.71 |
| Sample_T5B_k141_43132             | 5086  | 11 | 7 | 0  | Low-quality | 12.71 |
| Sample_C3A_k141_59861             | 5133  | 4  | 0 | 0  | Low-quality | 12.7  |
| Sample_T10A_k141_31556            | 10028 | 20 | 1 | 1  | Low-quality | 12.7  |
| Sample_T2C_k141_12206             | 5902  | 6  | 0 | 1  | Low-quality | 12.7  |
| Sample_T4B_k141_272036            | 10261 | 10 | 1 | 0  | Low-quality | 12.7  |
| Sample_C1C_k141_106900            | 5901  | 8  | 5 | 0  | Low-quality | 12.7  |
| Sample_C6C_k141_13834             | 5323  | 9  | 2 | 0  | Low-quality | 12.7  |
| Sample_T14A_k141_196750           | 7200  | 18 | 3 | 0  | Low-quality | 12.7  |
| Sample_T18A_k141_60866            | 7705  | 16 | 0 | 0  | Low-quality | 12.7  |
| Sample_C1A_k141_131415            | 8591  | 8  | 0 | 2  | Low-quality | 12.69 |
| Sample_C7B_k141_104782            | 22749 | 18 | 1 | 7  | Low-quality | 12.69 |
| Sample_T8A_k141_208312            | 6500  | 6  | 0 | 4  | Low-quality | 12.69 |
| Sample_C9A_k141_3067              | 6760  | 7  | 0 | 0  | Low-quality | 12.69 |
| Sample_T7A_k141_171228            | 7349  | 11 | 0 | 0  | Low-quality | 12.68 |
| Sample_T8B_k141_150414            | 5517  | 10 | 5 | 0  | Low-quality | 12.68 |
| Sample_T8C_k141_206113_fragment_1 | 11750 | 10 | 2 | 0  | Low-quality | 12.68 |
| Sample_T10B_k141_132510           | 41658 | 37 | 2 | 6  | Low-quality | 12.67 |
| Sample_C11C_k141_79576            | 5042  | 8  | 2 | 0  | Low-quality | 12.67 |
| Sample_C1B_k141_45542             | 5254  | 5  | 3 | 0  | Low-quality | 12.67 |
| Sample_C1B_k141_88351             | 5720  | 8  | 2 | 0  | Low-quality | 12.67 |
| Sample_C3A_k141_143240            | 10176 | 14 | 6 | 3  | Low-quality | 12.67 |
| Sample_T1C_k141_31033             | 8370  | 8  | 5 | 0  | Low-quality | 12.67 |
| Sample_T2A_k141_130757            | 5723  | 7  | 2 | 1  | Low-quality | 12.67 |
| Sample_T10B_k141_169188           | 5351  | 7  | 0 | 1  | Low-quality | 12.66 |
| Sample_T12A_k141_65013            | 9449  | 8  | 0 | 4  | Low-quality | 12.66 |

|                                 |       |    |   |    |             |       |
|---------------------------------|-------|----|---|----|-------------|-------|
| Sample_C1A_k141_164987          | 5530  | 7  | 1 | 0  | Low-quality | 12.66 |
| Sample_T12A_k141_298713         | 5112  | 7  | 0 | 1  | Low-quality | 12.66 |
| Sample_T8C_k141_14481           | 5177  | 8  | 1 | 0  | Low-quality | 12.66 |
| Sample_C4C_k141_177204          | 7804  | 15 | 1 | 6  | Low-quality | 12.65 |
| Sample_T15C_k141_127248         | 17681 | 14 | 1 | 5  | Low-quality | 12.65 |
| Sample_C10B_k141_106873         | 6412  | 10 | 1 | 0  | Low-quality | 12.65 |
| Sample_T12A_k141_88338          | 7145  | 10 | 2 | 0  | Low-quality | 12.65 |
| Sample_T8B_k141_90197           | 6008  | 9  | 4 | 0  | Low-quality | 12.65 |
| Sample_C7A_k141_28324           | 6088  | 6  | 0 | 1  | Low-quality | 12.64 |
| Sample_C8B_k141_67143           | 19637 | 22 | 1 | 9  | Low-quality | 12.64 |
| Sample_T10C_k141_24089          | 9086  | 12 | 0 | 10 | Low-quality | 12.64 |
| Sample_C11B_k141_143440         | 6433  | 7  | 5 | 0  | Low-quality | 12.64 |
| Sample_C3A_k141_193592          | 6262  | 12 | 8 | 0  | Low-quality | 12.64 |
| Sample_T6B_k141_3242            | 6919  | 8  | 2 | 0  | Low-quality | 12.64 |
| Sample_T13B_k141_118425         | 5296  | 5  | 0 | 1  | Low-quality | 12.63 |
| Sample_T18B_k141_136712         | 5868  | 8  | 5 | 0  | Low-quality | 12.63 |
| Sample_T17B_k141_28789          | 5302  | 6  | 0 | 3  | Low-quality | 12.62 |
| Sample_T18C_k141_44941          | 6204  | 8  | 0 | 2  | Low-quality | 12.62 |
| Sample_T2A_k141_81441           | 6105  | 17 | 2 | 0  | Low-quality | 12.62 |
| Sample_C12B_k141_141650         | 5145  | 13 | 1 | 0  | Low-quality | 12.62 |
| Sample_T15C_k141_119783         | 17805 | 23 | 2 | 1  | Low-quality | 12.62 |
| Sample_T4C_k141_100027          | 5295  | 13 | 0 | 0  | Low-quality | 12.62 |
| Sample_T2C_k141_129217          | 7279  | 15 | 1 | 0  | Low-quality | 12.61 |
| Sample_T16A_k141_122399         | 11338 | 11 | 1 | 1  | Low-quality | 12.6  |
| Sample_C12B_k141_35526          | 5230  | 8  | 1 | 0  | Low-quality | 12.6  |
| Sample_C6B_k141_155612          | 5739  | 7  | 5 | 0  | Low-quality | 12.6  |
| Sample_T16C_k141_99945          | 5220  | 8  | 5 | 0  | Low-quality | 12.6  |
| Sample_T2B_k141_306361          | 5419  | 12 | 5 | 0  | Low-quality | 12.6  |
| Sample_T3A_k141_41153           | 13866 | 11 | 0 | 7  | Low-quality | 12.59 |
| Sample_T7A_k141_273             | 7580  | 9  | 0 | 1  | Low-quality | 12.59 |
| Sample_T7C_k141_56903           | 10286 | 8  | 0 | 0  | Low-quality | 12.59 |
| Sample_T12B_k141_21695          | 5662  | 7  | 2 | 0  | Low-quality | 12.59 |
| Sample_C2C_k141_303064          | 10213 | 11 | 1 | 1  | Low-quality | 12.58 |
| Sample_T15B_k141_66300          | 20665 | 24 | 1 | 13 | Low-quality | 12.58 |
| Sample_T3C_k141_6925            | 8450  | 10 | 1 | 1  | Low-quality | 12.58 |
| Sample_T8B_k141_155389          | 13819 | 17 | 1 | 5  | Low-quality | 12.58 |
| Sample_C2B_k141_228326          | 5520  | 10 | 2 | 0  | Low-quality | 12.58 |
| Sample_T1B_k141_5100_fragment_1 | 5719  | 8  | 1 | 0  | Low-quality | 12.58 |
| Sample_C10C_k141_40157          | 5071  | 9  | 0 | 2  | Low-quality | 12.57 |

|                                   |       |    |   |    |             |       |
|-----------------------------------|-------|----|---|----|-------------|-------|
| Sample_C2A_k141_132276            | 19525 | 22 | 1 | 11 | Low-quality | 12.57 |
| Sample_T14A_k141_81721            | 25082 | 14 | 1 | 10 | Low-quality | 12.57 |
| Sample_C7C_k141_13886             | 22319 | 32 | 0 | 20 | Low-quality | 12.56 |
| Sample_C14C_k141_24465            | 6273  | 8  | 0 | 1  | Low-quality | 12.56 |
| Sample_T12B_k141_31752            | 7383  | 9  | 0 | 0  | Low-quality | 12.55 |
| Sample_T4C_k141_114567            | 5274  | 5  | 0 | 5  | Low-quality | 12.55 |
| Sample_C8C_k141_153704            | 8200  | 5  | 1 | 1  | Low-quality | 12.55 |
| Sample_T13C_k141_138429           | 7506  | 8  | 0 | 2  | Low-quality | 12.54 |
| Sample_C5A_k141_77775             | 5686  | 10 | 3 | 0  | Low-quality | 12.54 |
| Sample_T15B_k141_45724_fragment_1 | 5478  | 8  | 1 | 0  | Low-quality | 12.54 |
| Sample_C5A_k141_214533            | 5612  | 6  | 3 | 1  | Low-quality | 12.53 |
| Sample_T2B_k141_233582            | 5371  | 11 | 5 | 0  | Low-quality | 12.53 |
| Sample_C13B_k141_81884            | 9100  | 8  | 1 | 1  | Low-quality | 12.52 |
| Sample_C11B_k141_109668           | 5773  | 7  | 6 | 0  | Low-quality | 12.52 |
| Sample_C2B_k141_257001            | 5744  | 7  | 1 | 0  | Low-quality | 12.52 |
| Sample_C4B_k141_183186            | 6980  | 10 | 3 | 0  | Low-quality | 12.52 |
| Sample_C4B_k141_248176            | 38370 | 53 | 3 | 6  | Low-quality | 12.52 |
| Sample_T6C_k141_135132            | 11260 | 10 | 0 | 1  | Low-quality | 12.51 |
| Sample_C12B_k141_118977           | 5281  | 6  | 1 | 0  | Low-quality | 12.51 |
| Sample_T2A_k141_89190             | 6412  | 15 | 2 | 1  | Low-quality | 12.51 |
| Sample_T4C_k141_89857             | 5221  | 11 | 2 | 0  | Low-quality | 12.51 |
| Sample_C8C_k141_91467             | 5207  | 4  | 0 | 0  | Low-quality | 12.49 |
| Sample_C13C_k141_57259_fragment_1 | 15560 | 19 | 1 | 4  | Low-quality | 12.49 |
| Sample_T15B_k141_135722           | 7758  | 10 | 3 | 1  | Low-quality | 12.49 |
| Sample_T1B_k141_18138             | 17453 | 32 | 1 | 1  | Low-quality | 12.49 |
| Sample_C10A_k141_153533           | 25074 | 26 | 0 | 12 | Low-quality | 12.48 |
| Sample_C5C_k141_27393             | 6748  | 9  | 0 | 0  | Low-quality | 12.48 |
| Sample_T15C_k141_79589            | 7921  | 11 | 3 | 0  | Low-quality | 12.48 |
| Sample_T6A_k141_309979            | 13886 | 16 | 1 | 0  | Low-quality | 12.48 |
| Sample_C9A_k141_38389             | 17343 | 19 | 3 | 4  | Low-quality | 12.48 |
| Sample_T2C_k141_190808            | 5113  | 6  | 1 | 0  | Low-quality | 12.48 |
| Sample_T8A_k141_255203            | 7639  | 10 | 1 | 0  | Low-quality | 12.48 |
| Sample_T2C_k141_142551            | 6939  | 7  | 0 | 2  | Low-quality | 12.47 |
| Sample_C11C_k141_140792           | 9757  | 10 | 5 | 0  | Low-quality | 12.47 |
| Sample_C2B_k141_271141            | 5188  | 7  | 2 | 0  | Low-quality | 12.47 |
| Sample_C3A_k141_80109             | 10267 | 10 | 0 | 0  | Low-quality | 12.47 |
| Sample_T4B_k141_243337            | 7642  | 5  | 3 | 0  | Low-quality | 12.47 |
| Sample_C4B_k141_90130             | 7877  | 8  | 0 | 4  | Low-quality | 12.46 |
| Sample_C1A_k141_144556            | 6685  | 11 | 2 | 0  | Low-quality | 12.46 |



|                                   |       |    |   |    |             |       |
|-----------------------------------|-------|----|---|----|-------------|-------|
| Sample_C11B_k141_49977            | 8925  | 11 | 1 | 1  | Low-quality | 12.45 |
| Sample_T8A_k141_241831            | 21925 | 17 | 1 | 12 | Low-quality | 12.45 |
| Sample_C9A_k141_93237             | 5200  | 6  | 5 | 0  | Low-quality | 12.45 |
| Sample_T11B_k141_61085            | 5313  | 8  | 1 | 0  | Low-quality | 12.45 |
| Sample_T2A_k141_84555             | 11092 | 7  | 0 | 0  | Low-quality | 12.45 |
| Sample_T4B_k141_6326              | 7165  | 11 | 7 | 0  | Low-quality | 12.45 |
| Sample_C13B_k141_85274            | 5418  | 8  | 0 | 0  | Low-quality | 12.44 |
| Sample_C7A_k141_121484            | 7504  | 17 | 0 | 0  | Low-quality | 12.44 |
| Sample_T12C_k141_137898           | 13421 | 15 | 0 | 2  | Low-quality | 12.44 |
| Sample_C2A_k141_307785            | 13383 | 18 | 2 | 0  | Low-quality | 12.44 |
| Sample_C7C_k141_74241             | 14684 | 22 | 4 | 2  | Low-quality | 12.44 |
| Sample_T11A_k141_37008_fragment_1 | 10167 | 10 | 0 | 2  | Low-quality | 12.44 |
| Sample_T5C_k141_76235             | 5491  | 7  | 1 | 0  | Low-quality | 12.44 |
| Sample_C6B_k141_72428             | 7615  | 8  | 0 | 1  | Low-quality | 12.43 |
| Sample_T6A_k141_36218             | 24685 | 32 | 1 | 2  | Low-quality | 12.43 |
| Sample_T7C_k141_3459_fragment_1   | 6932  | 9  | 2 | 1  | Low-quality | 12.43 |
| Sample_T7C_k141_40024             | 5589  | 8  | 2 | 0  | Low-quality | 12.43 |
| Sample_C2B_k141_102662            | 7664  | 8  | 1 | 5  | Low-quality | 12.42 |
| Sample_T10A_k141_27259            | 8800  | 6  | 1 | 0  | Low-quality | 12.42 |
| Sample_T10B_k141_25616            | 8463  | 19 | 1 | 0  | Low-quality | 12.42 |
| Sample_T4B_k141_271246            | 19959 | 31 | 0 | 5  | Low-quality | 12.42 |
| Sample_C4C_k141_71407             | 5053  | 5  | 0 | 0  | Low-quality | 12.42 |
| Sample_T15C_k141_50739            | 28980 | 35 | 2 | 2  | Low-quality | 12.42 |
| Sample_C11B_k141_127403           | 5374  | 4  | 0 | 1  | Low-quality | 12.41 |
| Sample_C13C_k141_61341            | 5937  | 6  | 3 | 2  | Low-quality | 12.41 |
| Sample_C2A_k141_178508            | 5281  | 11 | 1 | 4  | Low-quality | 12.41 |
| Sample_T17B_k141_22415            | 7428  | 8  | 0 | 2  | Low-quality | 12.41 |
| Sample_T8A_k141_27953             | 5699  | 6  | 0 | 1  | Low-quality | 12.41 |
| Sample_T16A_k141_90898            | 5417  | 7  | 7 | 0  | Low-quality | 12.41 |
| Sample_T5A_k141_5424              | 8694  | 8  | 0 | 3  | Low-quality | 12.4  |
| Sample_C10A_k141_110413           | 5475  | 12 | 2 | 0  | Low-quality | 12.4  |
| Sample_T17C_k141_27921_fragment_2 | 7358  | 10 | 3 | 0  | Low-quality | 12.4  |
| Sample_T7B_k141_3587              | 9775  | 27 | 2 | 0  | Low-quality | 12.4  |
| Sample_C6B_k141_56424             | 5953  | 7  | 0 | 1  | Low-quality | 12.39 |
| Sample_T12A_k141_175927           | 5604  | 6  | 2 | 0  | Low-quality | 12.39 |
| Sample_T12A_k141_90913            | 6448  | 13 | 3 | 1  | Low-quality | 12.39 |
| Sample_T5C_k141_153859            | 12793 | 6  | 0 | 0  | Low-quality | 12.39 |
| Sample_C10A_k141_206374           | 6893  | 8  | 0 | 7  | Low-quality | 12.38 |
| Sample_T11A_k141_124414           | 9084  | 8  | 0 | 4  | Low-quality | 12.38 |

|                                  |       |    |    |    |             |       |
|----------------------------------|-------|----|----|----|-------------|-------|
| Sample_T12A_k141_109192          | 5055  | 12 | 1  | 0  | Low-quality | 12.38 |
| Sample_T12C_k141_184228          | 30068 | 39 | 1  | 5  | Low-quality | 12.38 |
| Sample_T17B_k141_600             | 10802 | 16 | 0  | 7  | Low-quality | 12.38 |
| Sample_C9C_k141_17925_fragment_1 | 5502  | 9  | 0  | 2  | Low-quality | 12.38 |
| Sample_C2A_k141_205035           | 5314  | 2  | 0  | 1  | Low-quality | 12.37 |
| Sample_C5A_k141_223309           | 6230  | 3  | 0  | 1  | Low-quality | 12.37 |
| Sample_C6A_k141_45091            | 44589 | 55 | 2  | 3  | Low-quality | 12.37 |
| Sample_C6B_k141_211963           | 5645  | 7  | 2  | 0  | Low-quality | 12.37 |
| Sample_T10B_k141_18856           | 19604 | 19 | 1  | 16 | Low-quality | 12.37 |
| Sample_T14A_k141_66462           | 9396  | 9  | 0  | 1  | Low-quality | 12.37 |
| Sample_C11C_k141_169291          | 5645  | 8  | 4  | 0  | Low-quality | 12.37 |
| Sample_T8C_k141_135103           | 5413  | 10 | 9  | 0  | Low-quality | 12.37 |
| Sample_C11C_k141_58185           | 5574  | 5  | 0  | 0  | Low-quality | 12.36 |
| Sample_T5B_k141_23021            | 5760  | 5  | 0  | 1  | Low-quality | 12.36 |
| Sample_T1C_k141_51844            | 15559 | 17 | 1  | 0  | Low-quality | 12.36 |
| Sample_T3B_k141_147585           | 5868  | 5  | 3  | 0  | Low-quality | 12.36 |
| Sample_C2C_k141_33439            | 13679 | 15 | 1  | 5  | Low-quality | 12.35 |
| Sample_T14B_k141_139211          | 19877 | 17 | 1  | 3  | Low-quality | 12.35 |
| Sample_T5C_k141_8112             | 12878 | 10 | 0  | 4  | Low-quality | 12.35 |
| Sample_C12A_k141_171351          | 7489  | 16 | 6  | 0  | Low-quality | 12.35 |
| Sample_C14A_k141_205824          | 5066  | 7  | 3  | 0  | Low-quality | 12.35 |
| Sample_C6B_k141_163045           | 7621  | 7  | 1  | 0  | Low-quality | 12.35 |
| Sample_T16C_k141_134263          | 6726  | 10 | 3  | 2  | Low-quality | 12.35 |
| Sample_T5B_k141_53535            | 5727  | 6  | 4  | 0  | Low-quality | 12.35 |
| Sample_C3B_k141_114697           | 7047  | 2  | 1  | 0  | Low-quality | 12.34 |
| Sample_C4A_k141_22686            | 5212  | 8  | 1  | 0  | Low-quality | 12.34 |
| Sample_T7B_k141_123121           | 5543  | 8  | 2  | 0  | Low-quality | 12.34 |
| Sample_C4A_k141_228577           | 5164  | 5  | 3  | 0  | Low-quality | 12.33 |
| Sample_C12A_k141_96657           | 22791 | 20 | 1  | 3  | Low-quality | 12.32 |
| Sample_C1B_k141_94806            | 8019  | 12 | 0  | 5  | Low-quality | 12.32 |
| Sample_T8B_k141_146842           | 7563  | 12 | 1  | 1  | Low-quality | 12.32 |
| Sample_C5A_k141_61982            | 29915 | 37 | 1  | 1  | Low-quality | 12.32 |
| Sample_C9A_k141_89568            | 5388  | 8  | 0  | 2  | Low-quality | 12.32 |
| Sample_T15B_k141_116912          | 5498  | 6  | 0  | 2  | Low-quality | 12.32 |
| Sample_C5A_k141_192815           | 26527 | 36 | 14 | 0  | Low-quality | 12.31 |
| Sample_T14A_k141_32584           | 18255 | 27 | 4  | 1  | Low-quality | 12.31 |
| Sample_T15A_k141_159601          | 7226  | 10 | 4  | 1  | Low-quality | 12.31 |
| Sample_T3B_k141_40896            | 15281 | 19 | 1  | 0  | Low-quality | 12.31 |
| Sample_C10A_k141_334639          | 37758 | 34 | 0  | 23 | Low-quality | 12.3  |

|                                    |       |    |   |    |             |       |
|------------------------------------|-------|----|---|----|-------------|-------|
| Sample_C3A_k141_78687              | 13276 | 15 | 0 | 3  | Low-quality | 12.3  |
| Sample_T18A_k141_51492             | 7364  | 14 | 0 | 4  | Low-quality | 12.3  |
| Sample_C3A_k141_97307              | 13402 | 12 | 3 | 0  | Low-quality | 12.3  |
| Sample_T10A_k141_7943              | 11505 | 17 | 2 | 1  | Low-quality | 12.3  |
| Sample_T11C_k141_23506             | 5159  | 6  | 2 | 0  | Low-quality | 12.3  |
| Sample_T14B_k141_134546_fragment_1 | 6985  | 8  | 0 | 1  | Low-quality | 12.3  |
| Sample_T2A_k141_55903              | 9528  | 21 | 4 | 2  | Low-quality | 12.3  |
| Sample_C11B_k141_223041            | 21228 | 18 | 1 | 11 | Low-quality | 12.29 |
| Sample_C1C_k141_30901              | 8217  | 11 | 1 | 1  | Low-quality | 12.29 |
| Sample_T12A_k141_130686            | 5161  | 9  | 3 | 0  | Low-quality | 12.29 |
| Sample_T13A_k141_50414             | 7264  | 15 | 5 | 0  | Low-quality | 12.29 |
| Sample_T2A_k141_278454             | 5042  | 6  | 2 | 0  | Low-quality | 12.29 |
| Sample_C10A_k141_265356            | 6380  | 8  | 6 | 0  | Low-quality | 12.28 |
| Sample_C9A_k141_133319             | 7735  | 8  | 0 | 2  | Low-quality | 12.28 |
| Sample_C6B_k141_51447              | 9911  | 12 | 1 | 3  | Low-quality | 12.27 |
| Sample_T15C_k141_50365             | 10031 | 8  | 0 | 6  | Low-quality | 12.27 |
| Sample_C1C_k141_152034             | 5123  | 11 | 2 | 0  | Low-quality | 12.27 |
| Sample_C7A_k141_30262              | 7237  | 7  | 0 | 1  | Low-quality | 12.27 |
| Sample_T11B_k141_68357_fragment_1  | 43079 | 43 | 1 | 4  | Low-quality | 12.26 |
| Sample_C6C_k141_79306              | 9783  | 3  | 2 | 0  | Low-quality | 12.25 |
| Sample_T16B_k141_121107            | 5148  | 6  | 0 | 5  | Low-quality | 12.25 |
| Sample_T3C_k141_94824              | 8713  | 12 | 1 | 4  | Low-quality | 12.25 |
| Sample_T18C_k141_16596_fragment_1  | 11108 | 10 | 1 | 3  | Low-quality | 12.25 |
| Sample_C10A_k141_162301            | 24353 | 26 | 1 | 20 | Low-quality | 12.24 |
| Sample_C2B_k141_315419             | 6585  | 6  | 0 | 1  | Low-quality | 12.24 |
| Sample_C5A_k141_59540              | 5144  | 5  | 0 | 4  | Low-quality | 12.24 |
| Sample_C8C_k141_24092              | 21374 | 20 | 0 | 14 | Low-quality | 12.24 |
| Sample_C9A_k141_5391               | 8973  | 5  | 1 | 0  | Low-quality | 12.24 |
| Sample_T10A_k141_82251             | 7327  | 11 | 1 | 0  | Low-quality | 12.24 |
| Sample_T12A_k141_164191            | 7908  | 8  | 0 | 0  | Low-quality | 12.24 |
| Sample_C6C_k141_208142             | 5524  | 8  | 3 | 0  | Low-quality | 12.24 |
| Sample_C9B_k141_89678              | 5345  | 6  | 0 | 0  | Low-quality | 12.24 |
| Sample_T2A_k141_16276              | 6854  | 8  | 4 | 0  | Low-quality | 12.24 |
| Sample_T2C_k141_27905              | 7274  | 7  | 1 | 0  | Low-quality | 12.24 |
| Sample_C11A_k141_66302             | 50805 | 49 | 2 | 19 | Low-quality | 12.23 |
| Sample_C1B_k141_86156              | 5618  | 3  | 0 | 0  | Low-quality | 12.23 |
| Sample_C1C_k141_39314_fragment_1   | 10069 | 14 | 0 | 0  | Low-quality | 12.23 |
| Sample_T12B_k141_156422            | 6535  | 7  | 0 | 3  | Low-quality | 12.22 |
| Sample_T2B_k141_230555             | 9371  | 6  | 0 | 2  | Low-quality | 12.22 |

|                                   |       |    |   |    |             |       |
|-----------------------------------|-------|----|---|----|-------------|-------|
| Sample_C2A_k141_188957            | 5147  | 7  | 0 | 2  | Low-quality | 12.22 |
| Sample_T10B_k141_119983           | 16608 | 36 | 2 | 2  | Low-quality | 12.22 |
| Sample_T11B_k141_9695             | 11546 | 12 | 1 | 0  | Low-quality | 12.22 |
| Sample_T2B_k141_272267_fragment_1 | 5226  | 8  | 1 | 0  | Low-quality | 12.22 |
| Sample_C12B_k141_141807           | 41284 | 40 | 0 | 24 | Low-quality | 12.21 |
| Sample_T11B_k141_127548           | 13030 | 10 | 0 | 3  | Low-quality | 12.21 |
| Sample_T14A_k141_55797            | 17830 | 18 | 1 | 9  | Low-quality | 12.21 |
| Sample_C1A_k141_245143            | 21193 | 22 | 9 | 1  | Low-quality | 12.21 |
| Sample_C4A_k141_158185            | 5019  | 8  | 6 | 0  | Low-quality | 12.21 |
| Sample_C5A_k141_77752             | 5559  | 8  | 2 | 0  | Low-quality | 12.21 |
| Sample_T6B_k141_48630             | 9648  | 17 | 3 | 3  | Low-quality | 12.19 |
| Sample_C11C_k141_143327           | 6578  | 10 | 1 | 0  | Low-quality | 12.19 |
| Sample_C4A_k141_5937              | 6974  | 6  | 0 | 0  | Low-quality | 12.18 |
| Sample_C4B_k141_121884            | 7896  | 7  | 0 | 3  | Low-quality | 12.18 |
| Sample_T7C_k141_17886             | 7705  | 12 | 0 | 1  | Low-quality | 12.18 |
| Sample_C10A_k141_109817           | 5559  | 7  | 3 | 0  | Low-quality | 12.18 |
| Sample_C1A_k141_53342             | 7888  | 3  | 0 | 0  | Low-quality | 12.17 |
| Sample_C4B_k141_137174            | 5421  | 11 | 2 | 0  | Low-quality | 12.17 |
| Sample_T12C_k141_126605           | 5993  | 11 | 2 | 0  | Low-quality | 12.17 |
| Sample_C10A_k141_183710           | 18496 | 16 | 2 | 2  | Low-quality | 12.16 |
| Sample_T10A_k141_3719             | 5936  | 6  | 0 | 6  | Low-quality | 12.16 |
| Sample_C11A_k141_183091           | 6810  | 10 | 4 | 0  | Low-quality | 12.16 |
| Sample_C4A_k141_239466            | 12917 | 20 | 2 | 0  | Low-quality | 12.16 |
| Sample_T15A_k141_162049           | 7136  | 9  | 1 | 0  | Low-quality | 12.16 |
| Sample_C3C_k141_265122            | 7637  | 8  | 0 | 4  | Low-quality | 12.15 |
| Sample_T2C_k141_20339             | 9524  | 9  | 0 | 5  | Low-quality | 12.15 |
| Sample_C10A_k141_46134            | 5349  | 8  | 0 | 1  | Low-quality | 12.15 |
| Sample_T10C_k141_46482            | 5252  | 16 | 2 | 0  | Low-quality | 12.15 |
| Sample_T12B_k141_3477             | 5355  | 10 | 3 | 0  | Low-quality | 12.15 |
| Sample_C10A_k141_77249            | 18726 | 23 | 0 | 8  | Low-quality | 12.14 |
| Sample_C14A_k141_47861            | 25499 | 26 | 0 | 18 | Low-quality | 12.14 |
| Sample_C6B_k141_122143            | 43322 | 50 | 2 | 9  | Low-quality | 12.14 |
| Sample_T12A_k141_185194           | 76453 | 88 | 6 | 38 | Low-quality | 12.14 |
| Sample_T11B_k141_159376           | 7742  | 13 | 3 | 0  | Low-quality | 12.14 |
| Sample_C8C_k141_91180             | 34055 | 32 | 1 | 8  | Low-quality | 12.13 |
| Sample_C11C_k141_98252            | 7200  | 10 | 3 | 0  | Low-quality | 12.13 |
| Sample_C8B_k141_188247_fragment_1 | 7672  | 13 | 1 | 1  | Low-quality | 12.13 |
| Sample_T13B_k141_10213            | 6172  | 8  | 6 | 0  | Low-quality | 12.13 |
| Sample_T2A_k141_134447            | 6750  | 10 | 8 | 1  | Low-quality | 12.13 |

|                                   |       |    |   |    |             |       |
|-----------------------------------|-------|----|---|----|-------------|-------|
| Sample_T6A_k141_303319            | 5292  | 7  | 2 | 0  | Low-quality | 12.13 |
| Sample_T7C_k141_2997              | 5505  | 16 | 3 | 0  | Low-quality | 12.13 |
| Sample_C13C_k141_59163            | 5092  | 4  | 0 | 4  | Low-quality | 12.12 |
| Sample_C10B_k141_69286            | 5617  | 7  | 5 | 0  | Low-quality | 12.12 |
| Sample_C3C_k141_264409            | 6983  | 12 | 4 | 0  | Low-quality | 12.12 |
| Sample_C12C_k141_12140            | 8006  | 11 | 1 | 1  | Low-quality | 12.11 |
| Sample_C1C_k141_133627            | 19897 | 22 | 1 | 3  | Low-quality | 12.11 |
| Sample_T11C_k141_29118            | 7248  | 11 | 0 | 3  | Low-quality | 12.11 |
| Sample_T17A_k141_12589            | 5404  | 6  | 5 | 0  | Low-quality | 12.11 |
| Sample_C5A_k141_31734             | 6349  | 7  | 0 | 1  | Low-quality | 12.1  |
| Sample_T17A_k141_12724            | 7130  | 14 | 3 | 0  | Low-quality | 12.1  |
| Sample_T2C_k141_37038             | 6105  | 6  | 0 | 2  | Low-quality | 12.1  |
| Sample_C2A_k141_50751             | 6061  | 10 | 0 | 1  | Low-quality | 12.09 |
| Sample_C6C_k141_116139            | 18681 | 17 | 1 | 14 | Low-quality | 12.09 |
| Sample_C3B_k141_185869            | 6961  | 13 | 1 | 1  | Low-quality | 12.08 |
| Sample_T17A_k141_22422_fragment_1 | 7343  | 13 | 8 | 0  | Low-quality | 12.07 |
| Sample_C3B_k141_273161            | 5147  | 3  | 0 | 1  | Low-quality | 12.06 |
| Sample_C5A_k141_30031             | 10747 | 11 | 1 | 0  | Low-quality | 12.06 |
| Sample_T12C_k141_152988           | 5551  | 11 | 4 | 0  | Low-quality | 12.06 |
| Sample_T13A_k141_131495           | 8664  | 9  | 0 | 0  | Low-quality | 12.06 |
| Sample_T8C_k141_134738            | 9737  | 12 | 1 | 3  | Low-quality | 12.05 |
| Sample_T11A_k141_50701            | 19519 | 22 | 1 | 5  | Low-quality | 12.04 |
| Sample_T15A_k141_53733            | 5928  | 8  | 0 | 2  | Low-quality | 12.04 |
| Sample_T15C_k141_124465           | 7274  | 8  | 0 | 1  | Low-quality | 12.04 |
| Sample_C1B_k141_97636_fragment_1  | 5248  | 10 | 1 | 0  | Low-quality | 12.04 |
| Sample_C4A_k141_242623            | 7803  | 9  | 0 | 1  | Low-quality | 12.04 |
| Sample_T10B_k141_73985            | 5368  | 6  | 4 | 0  | Low-quality | 12.04 |
| Sample_T15B_k141_67843            | 7713  | 8  | 1 | 0  | Low-quality | 12.04 |
| Sample_T3A_k141_88677             | 8197  | 10 | 3 | 0  | Low-quality | 12.04 |
| Sample_C5A_k141_247847            | 5868  | 7  | 1 | 0  | Low-quality | 12.03 |
| Sample_T3A_k141_111513            | 7205  | 9  | 0 | 4  | Low-quality | 12.03 |
| Sample_C4B_k141_175250            | 5314  | 10 | 5 | 0  | Low-quality | 12.03 |
| Sample_T15A_k141_13911            | 5870  | 9  | 0 | 0  | Low-quality | 12.03 |
| Sample_T17A_k141_19270            | 5826  | 10 | 1 | 0  | Low-quality | 12.03 |
| Sample_C8B_k141_36057             | 7344  | 11 | 8 | 0  | Low-quality | 12.01 |
| Sample_T16B_k141_122879           | 7296  | 11 | 4 | 1  | Low-quality | 12.01 |
| Sample_T8C_k141_205693            | 5443  | 10 | 7 | 0  | Low-quality | 12.01 |
| Sample_C2C_k141_214396            | 11385 | 7  | 0 | 1  | Low-quality | 12    |
| Sample_T8B_k141_52433             | 16735 | 20 | 2 | 4  | Low-quality | 12    |

|                                   |       |    |   |    |             |       |
|-----------------------------------|-------|----|---|----|-------------|-------|
| Sample_C13C_k141_70765            | 6630  | 7  | 0 | 1  | Low-quality | 12    |
| Sample_C6B_k141_140136            | 24634 | 31 | 3 | 1  | Low-quality | 12    |
| Sample_T12C_k141_179315           | 7663  | 10 | 0 | 0  | Low-quality | 12    |
| Sample_T13A_k141_84227            | 5672  | 11 | 9 | 0  | Low-quality | 12    |
| Sample_T16C_k141_95211            | 5082  | 6  | 3 | 0  | Low-quality | 12    |
| Sample_T6C_k141_51445             | 5104  | 7  | 0 | 1  | Low-quality | 12    |
| Sample_C3B_k141_147786            | 22108 | 29 | 1 | 4  | Low-quality | 11.99 |
| Sample_T12A_k141_15329            | 5574  | 4  | 0 | 2  | Low-quality | 11.99 |
| Sample_C13A_k141_93849            | 5482  | 8  | 6 | 0  | Low-quality | 11.99 |
| Sample_C13A_k141_18027            | 9683  | 15 | 1 | 3  | Low-quality | 11.98 |
| Sample_C11A_k141_32717            | 10999 | 12 | 7 | 2  | Low-quality | 11.98 |
| Sample_C4C_k141_201286            | 14932 | 10 | 1 | 2  | Low-quality | 11.98 |
| Sample_T14C_k141_156172           | 7920  | 5  | 1 | 0  | Low-quality | 11.98 |
| Sample_T18A_k141_198084           | 5590  | 6  | 1 | 1  | Low-quality | 11.98 |
| Sample_C13B_k141_28436            | 7168  | 7  | 0 | 4  | Low-quality | 11.97 |
| Sample_C3A_k141_156369            | 5081  | 6  | 0 | 1  | Low-quality | 11.97 |
| Sample_C3A_k141_237820            | 10787 | 11 | 5 | 0  | Low-quality | 11.97 |
| Sample_C4B_k141_204748            | 5951  | 5  | 0 | 1  | Low-quality | 11.97 |
| Sample_C12C_k141_197834           | 7905  | 13 | 1 | 2  | Low-quality | 11.96 |
| Sample_T8B_k141_20554             | 20875 | 18 | 0 | 14 | Low-quality | 11.96 |
| Sample_C11B_k141_104504           | 5078  | 10 | 8 | 0  | Low-quality | 11.96 |
| Sample_C3C_k141_113427            | 6934  | 11 | 1 | 0  | Low-quality | 11.96 |
| Sample_T4B_k141_191944_fragment_1 | 12356 | 17 | 3 | 2  | Low-quality | 11.96 |
| Sample_C10C_k141_210406           | 13426 | 16 | 0 | 5  | Low-quality | 11.95 |
| Sample_C1C_k141_82711             | 5021  | 4  | 0 | 4  | Low-quality | 11.95 |
| Sample_T17B_k141_1245             | 7153  | 10 | 0 | 1  | Low-quality | 11.95 |
| Sample_T4B_k141_236869            | 20830 | 15 | 1 | 1  | Low-quality | 11.95 |
| Sample_T5A_k141_3539              | 11232 | 13 | 1 | 1  | Low-quality | 11.95 |
| Sample_C1A_k141_6776              | 7548  | 7  | 0 | 1  | Low-quality | 11.94 |
| Sample_C4B_k141_81612             | 19998 | 20 | 0 | 9  | Low-quality | 11.94 |
| Sample_C5A_k141_49848             | 5480  | 7  | 0 | 1  | Low-quality | 11.94 |
| Sample_C11C_k141_162787           | 5517  | 11 | 1 | 0  | Low-quality | 11.94 |
| Sample_C5B_k141_55648             | 8458  | 12 | 0 | 1  | Low-quality | 11.94 |
| Sample_T2B_k141_197394            | 5780  | 9  | 4 | 0  | Low-quality | 11.94 |
| Sample_C12C_k141_59068            | 6448  | 8  | 1 | 0  | Low-quality | 11.93 |
| Sample_C7A_k141_57208             | 5506  | 5  | 0 | 0  | Low-quality | 11.93 |
| Sample_C11C_k141_6169             | 5372  | 11 | 1 | 0  | Low-quality | 11.93 |
| Sample_C3B_k141_57327             | 5604  | 7  | 0 | 1  | Low-quality | 11.93 |
| Sample_C7C_k141_51554             | 10726 | 10 | 0 | 1  | Low-quality | 11.92 |

|                                   |       |    |    |    |             |       |
|-----------------------------------|-------|----|----|----|-------------|-------|
| Sample_T11A_k141_43416            | 17736 | 20 | 1  | 3  | Low-quality | 11.92 |
| Sample_C10C_k141_9063             | 7566  | 13 | 2  | 1  | Low-quality | 11.92 |
| Sample_C3A_k141_250775            | 10045 | 17 | 3  | 0  | Low-quality | 11.92 |
| Sample_C14C_k141_103883           | 5273  | 6  | 1  | 0  | Low-quality | 11.91 |
| Sample_T13A_k141_115737           | 5676  | 12 | 9  | 0  | Low-quality | 11.91 |
| Sample_T7B_k141_77613_fragment_1  | 8068  | 8  | 0  | 1  | Low-quality | 11.91 |
| Sample_C12A_k141_171773           | 6238  | 9  | 1  | 1  | Low-quality | 11.89 |
| Sample_C3B_k141_150069            | 36089 | 27 | 0  | 18 | Low-quality | 11.89 |
| Sample_T18C_k141_38532_fragment_1 | 8104  | 9  | 0  | 1  | Low-quality | 11.89 |
| Sample_T4B_k141_234978            | 6718  | 15 | 3  | 0  | Low-quality | 11.89 |
| Sample_C11A_k141_114003           | 6092  | 7  | 0  | 4  | Low-quality | 11.88 |
| Sample_C6B_k141_191115            | 5796  | 5  | 0  | 4  | Low-quality | 11.88 |
| Sample_C11A_k141_155839           | 6651  | 8  | 2  | 0  | Low-quality | 11.88 |
| Sample_C2C_k141_12579             | 8310  | 10 | 2  | 0  | Low-quality | 11.88 |
| Sample_C3A_k141_54248             | 5619  | 6  | 1  | 0  | Low-quality | 11.88 |
| Sample_C4C_k141_40682             | 19162 | 23 | 12 | 0  | Low-quality | 11.88 |
| Sample_C12A_k141_149495           | 10906 | 22 | 0  | 1  | Low-quality | 11.87 |
| Sample_T6C_k141_186867            | 6078  | 7  | 3  | 0  | Low-quality | 11.87 |
| Sample_C12C_k141_59458            | 17632 | 26 | 1  | 3  | Low-quality | 11.85 |
| Sample_T12C_k141_119959           | 7646  | 6  | 0  | 2  | Low-quality | 11.85 |
| Sample_T4B_k141_87691             | 9681  | 10 | 0  | 3  | Low-quality | 11.85 |
| Sample_T7C_k141_84906             | 7093  | 11 | 0  | 2  | Low-quality | 11.85 |
| Sample_C1A_k141_193842            | 8725  | 11 | 3  | 0  | Low-quality | 11.85 |
| Sample_C3A_k141_31277             | 7447  | 7  | 6  | 0  | Low-quality | 11.85 |
| Sample_T10B_k141_44113            | 5791  | 10 | 2  | 0  | Low-quality | 11.85 |
| Sample_T6C_k141_34363_fragment_2  | 17140 | 21 | 2  | 2  | Low-quality | 11.85 |
| Sample_C9C_k141_24927             | 9514  | 7  | 2  | 2  | Low-quality | 11.84 |
| Sample_T18B_k141_50561            | 5951  | 7  | 3  | 1  | Low-quality | 11.84 |
| Sample_C9A_k141_22464             | 14402 | 12 | 2  | 5  | Low-quality | 11.83 |
| Sample_T3A_k141_32599             | 7080  | 6  | 0  | 5  | Low-quality | 11.83 |
| Sample_C14A_k141_187847           | 5573  | 12 | 2  | 0  | Low-quality | 11.83 |
| Sample_C3A_k141_152489            | 5414  | 6  | 4  | 0  | Low-quality | 11.83 |
| Sample_C3A_k141_238421            | 5340  | 6  | 3  | 0  | Low-quality | 11.83 |
| Sample_C6C_k141_136035            | 7125  | 9  | 7  | 0  | Low-quality | 11.83 |
| Sample_C7A_k141_177374            | 10649 | 9  | 0  | 1  | Low-quality | 11.83 |
| Sample_T13A_k141_104036           | 15815 | 36 | 3  | 2  | Low-quality | 11.83 |
| Sample_T13B_k141_18544            | 7531  | 8  | 1  | 1  | Low-quality | 11.83 |
| Sample_C5A_k141_98785             | 35953 | 34 | 0  | 22 | Low-quality | 11.82 |
| Sample_C7B_k141_27024             | 12435 | 17 | 2  | 8  | Low-quality | 11.82 |

|                                    |       |    |   |    |             |       |
|------------------------------------|-------|----|---|----|-------------|-------|
| Sample_T3A_k141_62367              | 7707  | 5  | 0 | 1  | Low-quality | 11.82 |
| Sample_C1B_k141_8402_fragment_2    | 20085 | 30 | 4 | 3  | Low-quality | 11.82 |
| Sample_C3A_k141_123722             | 17600 | 25 | 3 | 3  | Low-quality | 11.82 |
| Sample_T8B_k141_154582             | 5058  | 6  | 0 | 0  | Low-quality | 11.82 |
| Sample_T17C_k141_32490             | 13988 | 20 | 0 | 4  | Low-quality | 11.81 |
| Sample_C2B_k141_238252             | 6307  | 13 | 0 | 1  | Low-quality | 11.81 |
| Sample_C12A_k141_96109             | 7067  | 12 | 0 | 1  | Low-quality | 11.8  |
| Sample_C6B_k141_14339              | 17351 | 27 | 1 | 1  | Low-quality | 11.8  |
| Sample_T13B_k141_45587             | 9641  | 9  | 0 | 2  | Low-quality | 11.8  |
| Sample_T15A_k141_73342             | 7696  | 14 | 1 | 1  | Low-quality | 11.8  |
| Sample_T4B_k141_143783             | 6189  | 10 | 3 | 1  | Low-quality | 11.8  |
| Sample_T6A_k141_147688             | 5927  | 5  | 0 | 0  | Low-quality | 11.8  |
| Sample_T13B_k141_15088             | 5591  | 5  | 0 | 0  | Low-quality | 11.79 |
| Sample_C3A_k141_39284              | 8039  | 7  | 4 | 1  | Low-quality | 11.79 |
| Sample_C6C_k141_201134             | 5166  | 11 | 4 | 1  | Low-quality | 11.79 |
| Sample_C8C_k141_85816              | 9494  | 12 | 1 | 0  | Low-quality | 11.79 |
| Sample_T3B_k141_171993             | 5049  | 4  | 3 | 0  | Low-quality | 11.79 |
| Sample_T17B_k141_10189             | 12232 | 7  | 3 | 0  | Low-quality | 11.78 |
| Sample_T7A_k141_59478              | 18803 | 17 | 1 | 4  | Low-quality | 11.77 |
| Sample_T7B_k141_38701              | 5058  | 5  | 0 | 0  | Low-quality | 11.77 |
| Sample_C14A_k141_119425            | 10784 | 15 | 2 | 1  | Low-quality | 11.77 |
| Sample_T4B_k141_76905              | 9032  | 20 | 5 | 0  | Low-quality | 11.77 |
| Sample_C3B_k141_256030             | 7149  | 10 | 1 | 4  | Low-quality | 11.76 |
| Sample_C5A_k141_60228              | 12093 | 10 | 1 | 1  | Low-quality | 11.76 |
| Sample_C6A_k141_80220              | 7774  | 7  | 1 | 0  | Low-quality | 11.76 |
| Sample_C11A_k141_111687            | 6228  | 6  | 2 | 0  | Low-quality | 11.76 |
| Sample_T7C_k141_141325             | 5917  | 5  | 3 | 0  | Low-quality | 11.76 |
| Sample_C10B_k141_32846             | 11533 | 12 | 0 | 5  | Low-quality | 11.75 |
| Sample_C12A_k141_30909             | 7009  | 3  | 1 | 0  | Low-quality | 11.75 |
| Sample_C14A_k141_73128             | 91820 | 71 | 5 | 44 | Low-quality | 11.75 |
| Sample_C3B_k141_104081             | 21655 | 18 | 1 | 14 | Low-quality | 11.75 |
| Sample_T10C_k141_71657             | 9994  | 12 | 0 | 3  | Low-quality | 11.75 |
| Sample_T3B_k141_179025             | 11696 | 9  | 1 | 1  | Low-quality | 11.75 |
| Sample_T6A_k141_41966              | 32896 | 30 | 1 | 4  | Low-quality | 11.75 |
| Sample_C4C_k141_18482              | 5623  | 12 | 1 | 0  | Low-quality | 11.75 |
| Sample_T13B_k141_125626_fragment_2 | 8061  | 8  | 2 | 0  | Low-quality | 11.75 |
| Sample_T3C_k141_78195_fragment_1   | 10282 | 8  | 0 | 2  | Low-quality | 11.75 |
| Sample_C4C_k141_143829             | 5288  | 11 | 7 | 0  | Low-quality | 11.74 |
| Sample_C10C_k141_227079            | 9590  | 9  | 0 | 2  | Low-quality | 11.73 |



|                                    |       |    |   |    |             |       |
|------------------------------------|-------|----|---|----|-------------|-------|
| Sample_C3A_k141_3505               | 6311  | 1  | 1 | 0  | Low-quality | 11.73 |
| Sample_T12B_k141_55715             | 5034  | 5  | 0 | 1  | Low-quality | 11.73 |
| Sample_T17A_k141_48237             | 5442  | 8  | 6 | 0  | Low-quality | 11.73 |
| Sample_T5C_k141_26180              | 6338  | 6  | 1 | 1  | Low-quality | 11.73 |
| Sample_T8B_k141_113959             | 6133  | 14 | 3 | 1  | Low-quality | 11.73 |
| Sample_T8B_k141_234603             | 6780  | 11 | 1 | 0  | Low-quality | 11.73 |
| Sample_C1B_k141_28658              | 5416  | 8  | 1 | 0  | Low-quality | 11.72 |
| Sample_C2B_k141_185753             | 7306  | 9  | 0 | 2  | Low-quality | 11.72 |
| Sample_T4A_k141_20739              | 6344  | 9  | 0 | 2  | Low-quality | 11.72 |
| Sample_C2A_k141_166975             | 5368  | 9  | 5 | 0  | Low-quality | 11.72 |
| Sample_C5C_k141_39087              | 5693  | 9  | 5 | 1  | Low-quality | 11.72 |
| Sample_C5A_k141_67566              | 7704  | 16 | 0 | 0  | Low-quality | 11.71 |
| Sample_T14B_k141_122383            | 9498  | 11 | 1 | 0  | Low-quality | 11.71 |
| Sample_T13B_k141_151230_fragment_1 | 8622  | 9  | 1 | 2  | Low-quality | 11.71 |
| Sample_T2B_k141_35797              | 6398  | 8  | 0 | 0  | Low-quality | 11.7  |
| Sample_T3C_k141_36591              | 12687 | 17 | 0 | 2  | Low-quality | 11.7  |
| Sample_C14A_k141_202321            | 7298  | 8  | 3 | 0  | Low-quality | 11.7  |
| Sample_C1B_k141_49681              | 5022  | 6  | 0 | 1  | Low-quality | 11.7  |
| Sample_T8C_k141_73155              | 6354  | 10 | 2 | 0  | Low-quality | 11.7  |
| Sample_C3A_k141_246360             | 5571  | 12 | 8 | 0  | Low-quality | 11.69 |
| Sample_T13A_k141_95843             | 5386  | 4  | 0 | 0  | Low-quality | 11.69 |
| Sample_T7C_k141_41553              | 10359 | 12 | 1 | 5  | Low-quality | 11.68 |
| Sample_T5C_k141_143883             | 10465 | 10 | 0 | 0  | Low-quality | 11.68 |
| Sample_C13A_k141_35654             | 6855  | 14 | 1 | 3  | Low-quality | 11.67 |
| Sample_T12A_k141_196859            | 23788 | 28 | 1 | 6  | Low-quality | 11.67 |
| Sample_T1C_k141_35247              | 6808  | 8  | 1 | 0  | Low-quality | 11.67 |
| Sample_T3A_k141_44587              | 6989  | 10 | 0 | 2  | Low-quality | 11.67 |
| Sample_T7A_k141_138764             | 6989  | 10 | 0 | 0  | Low-quality | 11.67 |
| Sample_C9A_k141_75609              | 20764 | 22 | 5 | 0  | Low-quality | 11.67 |
| Sample_C7C_k141_29831              | 42542 | 34 | 1 | 25 | Low-quality | 11.66 |
| Sample_C8C_k141_163434             | 10920 | 9  | 0 | 3  | Low-quality | 11.66 |
| Sample_T8A_k141_33114              | 6276  | 5  | 0 | 2  | Low-quality | 11.66 |
| Sample_C3A_k141_132942             | 17266 | 45 | 0 | 0  | Low-quality | 11.66 |
| Sample_C8A_k141_56158              | 6828  | 5  | 0 | 1  | Low-quality | 11.65 |
| Sample_C10A_k141_309893_fragment_1 | 5870  | 12 | 2 | 0  | Low-quality | 11.65 |
| Sample_C7A_k141_128921             | 7579  | 13 | 3 | 0  | Low-quality | 11.65 |
| Sample_T1B_k141_29569              | 7197  | 13 | 3 | 0  | Low-quality | 11.65 |
| Sample_C7C_k141_78435              | 8249  | 10 | 0 | 5  | Low-quality | 11.64 |
| Sample_T2B_k141_230729             | 7189  | 5  | 0 | 1  | Low-quality | 11.64 |

|                                    |       |    |    |    |             |       |
|------------------------------------|-------|----|----|----|-------------|-------|
| Sample_T4B_k141_255254             | 5808  | 5  | 0  | 1  | Low-quality | 11.64 |
| Sample_C11A_k141_49021             | 9754  | 16 | 3  | 0  | Low-quality | 11.64 |
| Sample_C13C_k141_54606             | 6881  | 14 | 2  | 0  | Low-quality | 11.64 |
| Sample_T12B_k141_30885             | 30371 | 33 | 1  | 5  | Low-quality | 11.63 |
| Sample_T15C_k141_20927             | 7194  | 8  | 0  | 0  | Low-quality | 11.63 |
| Sample_T12C_k141_157589            | 5392  | 14 | 2  | 0  | Low-quality | 11.63 |
| Sample_T12C_k141_89726             | 16877 | 19 | 3  | 0  | Low-quality | 11.63 |
| Sample_T18A_k141_180511            | 5428  | 5  | 2  | 0  | Low-quality | 11.63 |
| Sample_T5C_k141_95420              | 7046  | 11 | 2  | 0  | Low-quality | 11.63 |
| Sample_C14A_k141_170588            | 8903  | 14 | 10 | 0  | Low-quality | 11.62 |
| Sample_C8B_k141_50965              | 10459 | 7  | 0  | 0  | Low-quality | 11.62 |
| Sample_C1C_k141_40792              | 9549  | 6  | 0  | 2  | Low-quality | 11.61 |
| Sample_C6C_k141_24739              | 5989  | 9  | 1  | 0  | Low-quality | 11.61 |
| Sample_T4B_k141_145770             | 21688 | 22 | 1  | 10 | Low-quality | 11.61 |
| Sample_T5B_k141_43071              | 6949  | 12 | 0  | 4  | Low-quality | 11.61 |
| Sample_T6B_k141_189373             | 32565 | 43 | 3  | 17 | Low-quality | 11.61 |
| Sample_T14B_k141_117894_fragment_1 | 6986  | 8  | 0  | 1  | Low-quality | 11.61 |
| Sample_T8A_k141_105161             | 6401  | 7  | 0  | 2  | Low-quality | 11.61 |
| Sample_C9A_k141_36791              | 5610  | 8  | 2  | 0  | Low-quality | 11.6  |
| Sample_T4A_k141_34841              | 5641  | 6  | 4  | 0  | Low-quality | 11.6  |
| Sample_C11C_k141_179618            | 20513 | 28 | 1  | 9  | Low-quality | 11.59 |
| Sample_C6A_k141_189899             | 7089  | 8  | 0  | 1  | Low-quality | 11.59 |
| Sample_C6C_k141_81786              | 8266  | 10 | 0  | 0  | Low-quality | 11.59 |
| Sample_T11B_k141_117644            | 5482  | 10 | 7  | 0  | Low-quality | 11.59 |
| Sample_T16C_k141_109953            | 23567 | 15 | 1  | 1  | Low-quality | 11.59 |
| Sample_T17C_k141_38985             | 12026 | 16 | 4  | 1  | Low-quality | 11.59 |
| Sample_T12C_k141_2476              | 6685  | 6  | 0  | 2  | Low-quality | 11.58 |
| Sample_T16C_k141_60809             | 21355 | 29 | 1  | 1  | Low-quality | 11.58 |
| Sample_T3A_k141_97278              | 10132 | 9  | 0  | 2  | Low-quality | 11.58 |
| Sample_C2B_k141_56850              | 6771  | 8  | 5  | 0  | Low-quality | 11.58 |
| Sample_C4C_k141_100251             | 8437  | 10 | 4  | 0  | Low-quality | 11.58 |
| Sample_C6B_k141_141039             | 5198  | 7  | 3  | 0  | Low-quality | 11.58 |
| Sample_C6C_k141_212774             | 6642  | 12 | 4  | 0  | Low-quality | 11.57 |
| Sample_T12B_k141_98349             | 15523 | 19 | 3  | 0  | Low-quality | 11.57 |
| Sample_T12C_k141_103954            | 7745  | 8  | 0  | 3  | Low-quality | 11.56 |
| Sample_T10B_k141_173978            | 7844  | 12 | 2  | 0  | Low-quality | 11.56 |
| Sample_T12A_k141_184822            | 20726 | 20 | 1  | 0  | Low-quality | 11.56 |
| Sample_T16A_k141_11448             | 5627  | 5  | 0  | 2  | Low-quality | 11.56 |
| Sample_C3A_k141_173650             | 5518  | 5  | 0  | 0  | Low-quality | 11.55 |

|                                  |       |    |   |    |             |       |
|----------------------------------|-------|----|---|----|-------------|-------|
| Sample_C3C_k141_57856            | 8818  | 19 | 1 | 0  | Low-quality | 11.55 |
| Sample_T12A_k141_177073          | 9204  | 14 | 0 | 0  | Low-quality | 11.55 |
| Sample_T12C_k141_106911          | 5193  | 8  | 4 | 0  | Low-quality | 11.55 |
| Sample_T8A_k141_210685           | 7205  | 5  | 1 | 0  | Low-quality | 11.55 |
| Sample_C2C_k141_149711           | 12465 | 8  | 0 | 4  | Low-quality | 11.53 |
| Sample_C6B_k141_7495             | 9436  | 6  | 0 | 3  | Low-quality | 11.53 |
| Sample_T2B_k141_140760           | 72828 | 70 | 2 | 29 | Low-quality | 11.53 |
| Sample_T4B_k141_6776             | 5179  | 10 | 1 | 0  | Low-quality | 11.53 |
| Sample_C8C_k141_148755           | 15374 | 36 | 4 | 2  | Low-quality | 11.53 |
| Sample_T5B_k141_3446             | 5615  | 11 | 8 | 0  | Low-quality | 11.53 |
| Sample_C10B_k141_85008           | 8317  | 11 | 0 | 5  | Low-quality | 11.52 |
| Sample_C11A_k141_141063          | 8709  | 10 | 1 | 4  | Low-quality | 11.52 |
| Sample_C11B_k141_182318          | 9194  | 3  | 2 | 0  | Low-quality | 11.52 |
| Sample_T18C_k141_117248          | 9416  | 8  | 0 | 2  | Low-quality | 11.52 |
| Sample_C11C_k141_1970            | 5560  | 12 | 2 | 0  | Low-quality | 11.52 |
| Sample_C2C_k141_18534            | 5291  | 6  | 2 | 0  | Low-quality | 11.52 |
| Sample_C2C_k141_158342           | 5167  | 9  | 4 | 0  | Low-quality | 11.51 |
| Sample_C5C_k141_114299           | 5474  | 6  | 6 | 0  | Low-quality | 11.51 |
| Sample_T11A_k141_49138           | 15453 | 9  | 3 | 0  | Low-quality | 11.51 |
| Sample_T12A_k141_190728          | 5195  | 4  | 2 | 0  | Low-quality | 11.51 |
| Sample_T16C_k141_93095           | 6308  | 5  | 1 | 0  | Low-quality | 11.51 |
| Sample_T4B_k141_229211           | 18366 | 23 | 6 | 0  | Low-quality | 11.51 |
| Sample_C3B_k141_162059           | 5340  | 11 | 2 | 0  | Low-quality | 11.5  |
| Sample_C9A_k141_118821           | 21196 | 32 | 1 | 3  | Low-quality | 11.5  |
| Sample_T14A_k141_23204           | 7499  | 3  | 1 | 0  | Low-quality | 11.5  |
| Sample_C5C_k141_71090_fragment_1 | 6014  | 10 | 1 | 1  | Low-quality | 11.5  |
| Sample_C12A_k141_189882          | 5338  | 3  | 0 | 3  | Low-quality | 11.49 |
| Sample_C6C_k141_61184            | 6399  | 7  | 0 | 6  | Low-quality | 11.49 |
| Sample_T15C_k141_32383           | 11377 | 13 | 0 | 4  | Low-quality | 11.49 |
| Sample_T16C_k141_71680           | 10338 | 8  | 0 | 0  | Low-quality | 11.49 |
| Sample_C14C_k141_159243          | 32038 | 26 | 1 | 14 | Low-quality | 11.48 |
| Sample_T14B_k141_147438          | 10781 | 11 | 0 | 1  | Low-quality | 11.48 |
| Sample_C6C_k141_229527           | 5156  | 5  | 1 | 0  | Low-quality | 11.46 |
| Sample_C8A_k141_171563           | 8806  | 4  | 0 | 2  | Low-quality | 11.46 |
| Sample_T4B_k141_52694            | 43220 | 45 | 0 | 34 | Low-quality | 11.46 |
| Sample_C3A_k141_119883           | 6113  | 11 | 2 | 0  | Low-quality | 11.46 |
| Sample_C3B_k141_107806           | 6741  | 7  | 1 | 2  | Low-quality | 11.46 |
| Sample_T10B_k141_129232          | 5157  | 9  | 3 | 0  | Low-quality | 11.46 |
| Sample_T14A_k141_58078           | 12276 | 10 | 3 | 1  | Low-quality | 11.46 |

|                                    |       |    |    |    |             |       |
|------------------------------------|-------|----|----|----|-------------|-------|
| Sample_C3C_k141_83542              | 53367 | 28 | 1  | 20 | Low-quality | 11.45 |
| Sample_T2A_k141_165820             | 5157  | 11 | 3  | 0  | Low-quality | 11.45 |
| Sample_C10C_k141_80616             | 8340  | 13 | 0  | 2  | Low-quality | 11.44 |
| Sample_T4B_k141_301974             | 6894  | 8  | 0  | 1  | Low-quality | 11.44 |
| Sample_C10A_k141_179293            | 5485  | 7  | 7  | 0  | Low-quality | 11.44 |
| Sample_C5A_k141_158628             | 5425  | 9  | 0  | 0  | Low-quality | 11.44 |
| Sample_T18C_k141_21623             | 6270  | 8  | 0  | 1  | Low-quality | 11.44 |
| Sample_C11A_k141_147637            | 7693  | 10 | 0  | 2  | Low-quality | 11.43 |
| Sample_T2B_k141_51411              | 15196 | 16 | 0  | 6  | Low-quality | 11.43 |
| Sample_T2C_k141_85224              | 7235  | 8  | 0  | 4  | Low-quality | 11.43 |
| Sample_T3C_k141_37562              | 6389  | 14 | 1  | 2  | Low-quality | 11.43 |
| Sample_C14A_k141_84665             | 5316  | 12 | 2  | 0  | Low-quality | 11.43 |
| Sample_C4B_k141_222174             | 5350  | 7  | 2  | 0  | Low-quality | 11.43 |
| Sample_C7B_k141_73824_fragment_1   | 7516  | 11 | 1  | 0  | Low-quality | 11.43 |
| Sample_T12A_k141_54712             | 8385  | 10 | 4  | 0  | Low-quality | 11.43 |
| Sample_T13C_k141_11992             | 5973  | 10 | 3  | 1  | Low-quality | 11.43 |
| Sample_T4B_k141_314859             | 19536 | 36 | 3  | 2  | Low-quality | 11.43 |
| Sample_C12C_k141_24107             | 8204  | 12 | 0  | 1  | Low-quality | 11.42 |
| Sample_T16B_k141_23655             | 23771 | 25 | 0  | 15 | Low-quality | 11.42 |
| Sample_C10A_k141_312173            | 15045 | 11 | 0  | 8  | Low-quality | 11.41 |
| Sample_C2A_k141_34579              | 7334  | 7  | 0  | 2  | Low-quality | 11.41 |
| Sample_C2B_k141_287594             | 62458 | 47 | 1  | 33 | Low-quality | 11.41 |
| Sample_T5C_k141_12513              | 18040 | 13 | 1  | 5  | Low-quality | 11.41 |
| Sample_C10A_k141_329324            | 8733  | 13 | 10 | 0  | Low-quality | 11.41 |
| Sample_C14B_k141_21412             | 6503  | 11 | 7  | 0  | Low-quality | 11.41 |
| Sample_T10A_k141_105262_fragment_1 | 8316  | 8  | 0  | 1  | Low-quality | 11.41 |
| Sample_C3B_k141_180891             | 10472 | 14 | 2  | 0  | Low-quality | 11.4  |
| Sample_C5A_k141_141370             | 5271  | 13 | 1  | 2  | Low-quality | 11.4  |
| Sample_C2A_k141_315986             | 5020  | 5  | 0  | 1  | Low-quality | 11.39 |
| Sample_C1A_k141_105984             | 8671  | 6  | 1  | 1  | Low-quality | 11.39 |
| Sample_C10C_k141_169278            | 13880 | 17 | 1  | 3  | Low-quality | 11.38 |
| Sample_C12C_k141_78174             | 11885 | 9  | 0  | 5  | Low-quality | 11.38 |
| Sample_T12A_k141_138962            | 7020  | 14 | 1  | 6  | Low-quality | 11.38 |
| Sample_T16B_k141_19258             | 7358  | 12 | 2  | 1  | Low-quality | 11.38 |
| Sample_T5B_k141_66251              | 5586  | 6  | 3  | 3  | Low-quality | 11.38 |
| Sample_T6C_k141_6872               | 6816  | 6  | 0  | 1  | Low-quality | 11.38 |
| Sample_T7B_k141_118265             | 5724  | 5  | 0  | 1  | Low-quality | 11.38 |
| Sample_C11A_k141_115965            | 20674 | 19 | 0  | 3  | Low-quality | 11.37 |
| Sample_T11B_k141_5762              | 5333  | 14 | 1  | 0  | Low-quality | 11.37 |

|                                    |       |    |   |    |             |       |
|------------------------------------|-------|----|---|----|-------------|-------|
| Sample_T12B_k141_179665            | 9094  | 19 | 0 | 0  | Low-quality | 11.37 |
| Sample_T15C_k141_119857            | 12279 | 13 | 1 | 3  | Low-quality | 11.37 |
| Sample_C6B_k141_98118              | 6867  | 13 | 2 | 0  | Low-quality | 11.37 |
| Sample_T12A_k141_135613            | 5053  | 4  | 4 | 0  | Low-quality | 11.37 |
| Sample_T14B_k141_120464            | 5098  | 7  | 2 | 0  | Low-quality | 11.37 |
| Sample_C6A_k141_111911             | 15490 | 18 | 1 | 5  | Low-quality | 11.36 |
| Sample_C8B_k141_125232             | 7211  | 9  | 0 | 1  | Low-quality | 11.36 |
| Sample_T16C_k141_76904             | 7509  | 7  | 1 | 0  | Low-quality | 11.36 |
| Sample_C5A_k141_79481              | 20210 | 16 | 2 | 0  | Low-quality | 11.36 |
| Sample_T3A_k141_50041              | 7117  | 13 | 3 | 1  | Low-quality | 11.36 |
| Sample_C10C_k141_218852            | 8669  | 9  | 0 | 7  | Low-quality | 11.35 |
| Sample_C2C_k141_103465             | 9426  | 2  | 0 | 0  | Low-quality | 11.35 |
| Sample_T16B_k141_45519             | 20930 | 30 | 1 | 2  | Low-quality | 11.35 |
| Sample_T2B_k141_161602             | 8498  | 4  | 0 | 1  | Low-quality | 11.35 |
| Sample_T6C_k141_18307              | 5205  | 5  | 0 | 4  | Low-quality | 11.35 |
| Sample_T7A_k141_14339              | 9343  | 9  | 0 | 1  | Low-quality | 11.35 |
| Sample_C11A_k141_105356            | 7175  | 16 | 1 | 0  | Low-quality | 11.35 |
| Sample_C13B_k141_55425             | 5202  | 9  | 0 | 0  | Low-quality | 11.35 |
| Sample_C14A_k141_218970            | 5955  | 11 | 2 | 0  | Low-quality | 11.35 |
| Sample_C5A_k141_61769              | 10608 | 12 | 2 | 1  | Low-quality | 11.35 |
| Sample_C13A_k141_5982              | 7026  | 10 | 3 | 2  | Low-quality | 11.33 |
| Sample_C11A_k141_155189_fragment_1 | 12964 | 15 | 2 | 1  | Low-quality | 11.33 |
| Sample_C12B_k141_52503             | 10198 | 7  | 0 | 1  | Low-quality | 11.33 |
| Sample_C14C_k141_170729            | 41327 | 36 | 1 | 29 | Low-quality | 11.32 |
| Sample_C9B_k141_18171              | 5680  | 9  | 0 | 2  | Low-quality | 11.32 |
| Sample_C2A_k141_309749             | 8459  | 11 | 1 | 2  | Low-quality | 11.32 |
| Sample_C11A_k141_59903             | 6334  | 15 | 0 | 0  | Low-quality | 11.31 |
| Sample_C2B_k141_302003             | 5236  | 6  | 0 | 1  | Low-quality | 11.31 |
| Sample_T6B_k141_48207              | 36262 | 38 | 2 | 11 | Low-quality | 11.31 |
| Sample_T5A_k141_7030_fragment_1    | 12095 | 18 | 3 | 0  | Low-quality | 11.31 |
| Sample_C12A_k141_91532             | 11820 | 9  | 1 | 4  | Low-quality | 11.3  |
| Sample_T12B_k141_106597            | 19182 | 15 | 1 | 2  | Low-quality | 11.3  |
| Sample_T2B_k141_106248             | 7467  | 7  | 1 | 2  | Low-quality | 11.3  |
| Sample_C4B_k141_186909             | 27905 | 33 | 5 | 0  | Low-quality | 11.3  |
| Sample_C10A_k141_18377             | 6677  | 12 | 0 | 1  | Low-quality | 11.29 |
| Sample_T15A_k141_37996             | 5788  | 9  | 0 | 0  | Low-quality | 11.29 |
| Sample_T17A_k141_6100              | 17539 | 11 | 1 | 2  | Low-quality | 11.29 |
| Sample_T14A_k141_113031_fragment_1 | 9519  | 12 | 1 | 3  | Low-quality | 11.29 |
| Sample_T15A_k141_1097              | 6409  | 5  | 2 | 0  | Low-quality | 11.29 |

|                                   |        |     |   |    |             |       |
|-----------------------------------|--------|-----|---|----|-------------|-------|
| Sample_T2B_k141_64685             | 6690   | 8   | 1 | 0  | Low-quality | 11.29 |
| Sample_T2B_k141_241067            | 5514   | 7   | 2 | 1  | Low-quality | 11.29 |
| Sample_C12C_k141_154615           | 5034   | 10  | 5 | 0  | Low-quality | 11.28 |
| Sample_T7A_k141_87662             | 9221   | 7   | 0 | 2  | Low-quality | 11.28 |
| Sample_C13A_k141_26711            | 8786   | 20  | 4 | 0  | Low-quality | 11.28 |
| Sample_C7B_k141_60729             | 16187  | 10  | 1 | 1  | Low-quality | 11.28 |
| Sample_C9A_k141_68816             | 6261   | 7   | 0 | 1  | Low-quality | 11.28 |
| Sample_C4A_k141_772               | 5490   | 5   | 0 | 1  | Low-quality | 11.27 |
| Sample_C14A_k141_128620           | 6121   | 5   | 3 | 0  | Low-quality | 11.27 |
| Sample_C14A_k141_227364           | 5426   | 8   | 6 | 0  | Low-quality | 11.27 |
| Sample_C7A_k141_18527             | 6220   | 7   | 1 | 0  | Low-quality | 11.27 |
| Sample_T12A_k141_24051            | 9854   | 24  | 1 | 1  | Low-quality | 11.27 |
| Sample_T16C_k141_50106            | 7481   | 12  | 5 | 1  | Low-quality | 11.27 |
| Sample_C10C_k141_140618           | 5036   | 8   | 1 | 0  | Low-quality | 11.26 |
| Sample_C14A_k141_229234           | 6033   | 10  | 5 | 0  | Low-quality | 11.26 |
| Sample_T6A_k141_308026            | 5654   | 8   | 0 | 0  | Low-quality | 11.26 |
| Sample_T8B_k141_232753_fragment_1 | 7879   | 10  | 3 | 3  | Low-quality | 11.26 |
| Sample_C1B_k141_144198            | 18485  | 19  | 1 | 11 | Low-quality | 11.25 |
| Sample_T14B_k141_204915           | 11564  | 12  | 0 | 2  | Low-quality | 11.25 |
| Sample_C2A_k141_199586            | 8399   | 9   | 1 | 1  | Low-quality | 11.25 |
| Sample_T3B_k141_71080             | 18895  | 8   | 2 | 0  | Low-quality | 11.25 |
| Sample_T7C_k141_9060              | 10376  | 10  | 0 | 1  | Low-quality | 11.25 |
| Sample_T14B_k141_59977            | 7673   | 9   | 0 | 6  | Low-quality | 11.24 |
| Sample_C3A_k141_230802            | 132643 | 132 | 1 | 72 | Low-quality | 11.23 |
| Sample_C1B_k141_247155            | 5219   | 9   | 3 | 0  | Low-quality | 11.23 |
| Sample_C2A_k141_160170            | 7841   | 11  | 5 | 0  | Low-quality | 11.23 |
| Sample_T10C_k141_48717            | 7024   | 12  | 2 | 0  | Low-quality | 11.23 |
| Sample_T8C_k141_124468            | 6317   | 6   | 0 | 0  | Low-quality | 11.23 |
| Sample_C13B_k141_103000           | 5660   | 16  | 4 | 0  | Low-quality | 11.22 |
| Sample_T6B_k141_41930             | 5534   | 6   | 0 | 1  | Low-quality | 11.22 |
| Sample_T7A_k141_3917              | 11485  | 13  | 0 | 2  | Low-quality | 11.22 |
| Sample_T8B_k141_52659             | 7544   | 10  | 0 | 1  | Low-quality | 11.22 |
| Sample_C12A_k141_138608           | 6799   | 10  | 2 | 0  | Low-quality | 11.22 |
| Sample_C14C_k141_33994            | 15646  | 24  | 3 | 0  | Low-quality | 11.22 |
| Sample_C5A_k141_244323            | 5786   | 5   | 3 | 0  | Low-quality | 11.22 |
| Sample_C4C_k141_83912             | 24915  | 28  | 1 | 3  | Low-quality | 11.21 |
| Sample_T18C_k141_47171            | 31483  | 31  | 1 | 11 | Low-quality | 11.21 |
| Sample_T5C_k141_182946            | 9159   | 12  | 0 | 2  | Low-quality | 11.21 |
| Sample_C5A_k141_192702            | 11128  | 18  | 2 | 0  | Low-quality | 11.21 |

|                                   |       |    |   |    |             |       |
|-----------------------------------|-------|----|---|----|-------------|-------|
| Sample_T4B_k141_87066             | 9983  | 9  | 1 | 1  | Low-quality | 11.21 |
| Sample_T8A_k141_211994            | 7229  | 17 | 1 | 0  | Low-quality | 11.21 |
| Sample_T8C_k141_187095            | 6770  | 11 | 3 | 0  | Low-quality | 11.21 |
| Sample_C10C_k141_200246           | 9044  | 16 | 2 | 0  | Low-quality | 11.2  |
| Sample_C9A_k141_70064             | 5410  | 8  | 4 | 0  | Low-quality | 11.2  |
| Sample_T5C_k141_108995            | 7882  | 9  | 2 | 1  | Low-quality | 11.19 |
| Sample_C6B_k141_31829             | 5433  | 7  | 1 | 0  | Low-quality | 11.19 |
| Sample_C8A_k141_29787             | 5463  | 8  | 4 | 0  | Low-quality | 11.19 |
| Sample_T4B_k141_45193             | 5067  | 6  | 3 | 0  | Low-quality | 11.19 |
| Sample_T6A_k141_221271            | 6390  | 9  | 3 | 0  | Low-quality | 11.19 |
| Sample_T5C_k141_60128             | 6759  | 13 | 5 | 0  | Low-quality | 11.18 |
| Sample_T5B_k141_51068             | 6685  | 9  | 0 | 3  | Low-quality | 11.17 |
| Sample_C11B_k141_101090           | 6206  | 7  | 1 | 0  | Low-quality | 11.17 |
| Sample_C2B_k141_130990            | 5145  | 7  | 2 | 0  | Low-quality | 11.17 |
| Sample_T6C_k141_64162             | 8192  | 1  | 0 | 0  | Low-quality | 11.16 |
| Sample_C5A_k141_36130             | 5296  | 11 | 4 | 0  | Low-quality | 11.16 |
| Sample_T11B_k141_31083            | 6239  | 15 | 1 | 0  | Low-quality | 11.16 |
| Sample_T5C_k141_194944            | 6594  | 14 | 2 | 1  | Low-quality | 11.15 |
| Sample_C13B_k141_12684            | 20681 | 22 | 0 | 22 | Low-quality | 11.14 |
| Sample_C8B_k141_10298             | 6419  | 9  | 3 | 0  | Low-quality | 11.14 |
| Sample_C2C_k141_312187            | 5944  | 9  | 4 | 0  | Low-quality | 11.14 |
| Sample_C7B_k141_110433            | 6891  | 12 | 6 | 0  | Low-quality | 11.14 |
| Sample_C8C_k141_113554            | 6092  | 6  | 0 | 1  | Low-quality | 11.14 |
| Sample_T10B_k141_67047_fragment_3 | 27141 | 36 | 3 | 3  | Low-quality | 11.14 |
| Sample_C7B_k141_43547             | 12528 | 15 | 1 | 3  | Low-quality | 11.13 |
| Sample_T18B_k141_16433            | 18290 | 21 | 1 | 5  | Low-quality | 11.13 |
| Sample_C3A_k141_211683            | 13871 | 17 | 1 | 0  | Low-quality | 11.13 |
| Sample_C8A_k141_25654             | 5180  | 10 | 4 | 0  | Low-quality | 11.13 |
| Sample_C9B_k141_90199_fragment_2  | 11963 | 11 | 0 | 1  | Low-quality | 11.13 |
| Sample_T16B_k141_77013            | 5109  | 6  | 1 | 0  | Low-quality | 11.13 |
| Sample_T6A_k141_4112              | 8647  | 18 | 6 | 0  | Low-quality | 11.13 |
| Sample_T7A_k141_204613            | 12260 | 15 | 0 | 0  | Low-quality | 11.13 |
| Sample_C3C_k141_168097            | 6421  | 17 | 1 | 0  | Low-quality | 11.12 |
| Sample_T12B_k141_138427           | 6036  | 11 | 4 | 0  | Low-quality | 11.12 |
| Sample_T8C_k141_98104             | 5070  | 8  | 5 | 0  | Low-quality | 11.12 |
| Sample_T6B_k141_8859              | 17259 | 24 | 1 | 14 | Low-quality | 11.11 |
| Sample_C14C_k141_8867             | 6831  | 6  | 0 | 3  | Low-quality | 11.11 |
| Sample_T7C_k141_66668             | 8962  | 17 | 3 | 2  | Low-quality | 11.11 |
| Sample_T14B_k141_122305           | 8174  | 6  | 0 | 3  | Low-quality | 11.1  |

|                                   |       |    |   |    |             |       |
|-----------------------------------|-------|----|---|----|-------------|-------|
| Sample_C10A_k141_235579           | 5035  | 6  | 1 | 0  | Low-quality | 11.1  |
| Sample_C12C_k141_55236            | 7338  | 9  | 1 | 0  | Low-quality | 11.1  |
| Sample_C1B_k141_150416            | 5917  | 8  | 1 | 1  | Low-quality | 11.09 |
| Sample_C4B_k141_150107            | 37538 | 28 | 0 | 15 | Low-quality | 11.09 |
| Sample_T3B_k141_113862            | 6091  | 13 | 0 | 1  | Low-quality | 11.09 |
| Sample_T18C_k141_108503           | 7328  | 9  | 1 | 0  | Low-quality | 11.09 |
| Sample_T5C_k141_127285            | 6988  | 8  | 0 | 1  | Low-quality | 11.09 |
| Sample_C10A_k141_190894           | 6104  | 10 | 2 | 0  | Low-quality | 11.08 |
| Sample_T3B_k141_151271            | 17665 | 14 | 1 | 5  | Low-quality | 11.08 |
| Sample_T14A_k141_42127            | 5650  | 10 | 4 | 0  | Low-quality | 11.08 |
| Sample_T17A_k141_19747_fragment_2 | 5951  | 9  | 1 | 2  | Low-quality | 11.08 |
| Sample_C11C_k141_138272           | 7689  | 11 | 0 | 1  | Low-quality | 11.07 |
| Sample_C12B_k141_83772            | 9796  | 13 | 0 | 4  | Low-quality | 11.07 |
| Sample_C4B_k141_186451            | 17110 | 18 | 1 | 11 | Low-quality | 11.07 |
| Sample_T17C_k141_18942            | 6720  | 18 | 1 | 0  | Low-quality | 11.07 |
| Sample_T7A_k141_197405            | 5796  | 7  | 1 | 1  | Low-quality | 11.07 |
| Sample_T10B_k141_79810            | 10462 | 7  | 0 | 2  | Low-quality | 11.06 |
| Sample_T6B_k141_159385            | 19504 | 25 | 1 | 10 | Low-quality | 11.06 |
| Sample_T8A_k141_43194             | 6252  | 7  | 1 | 0  | Low-quality | 11.06 |
| Sample_C11B_k141_128677           | 15207 | 13 | 0 | 8  | Low-quality | 11.05 |
| Sample_C6C_k141_36710             | 6153  | 10 | 0 | 3  | Low-quality | 11.05 |
| Sample_C9C_k141_67624             | 5091  | 7  | 0 | 0  | Low-quality | 11.05 |
| Sample_T13A_k141_106582           | 5303  | 12 | 8 | 0  | Low-quality | 11.05 |
| Sample_T15C_k141_63056            | 5534  | 6  | 0 | 0  | Low-quality | 11.05 |
| Sample_T4B_k141_42854             | 20802 | 25 | 1 | 3  | Low-quality | 11.05 |
| Sample_C10C_k141_70638            | 38792 | 35 | 1 | 21 | Low-quality | 11.04 |
| Sample_C2C_k141_10710             | 6363  | 8  | 0 | 1  | Low-quality | 11.04 |
| Sample_T15A_k141_72351            | 8788  | 5  | 1 | 0  | Low-quality | 11.04 |
| Sample_C7A_k141_50669             | 5126  | 5  | 0 | 2  | Low-quality | 11.03 |
| Sample_T14C_k141_83397            | 9426  | 12 | 0 | 6  | Low-quality | 11.03 |
| Sample_T18B_k141_113074           | 7061  | 7  | 0 | 0  | Low-quality | 11.03 |
| Sample_C4A_k141_123854            | 6385  | 10 | 4 | 0  | Low-quality | 11.03 |
| Sample_C7B_k141_92720_fragment_1  | 9592  | 12 | 1 | 2  | Low-quality | 11.03 |
| Sample_C1A_k141_231277            | 12101 | 7  | 1 | 4  | Low-quality | 11.02 |
| Sample_T15B_k141_117522           | 6907  | 13 | 2 | 0  | Low-quality | 11.02 |
| Sample_T3A_k141_88400             | 6231  | 6  | 1 | 1  | Low-quality | 11.02 |
| Sample_C3C_k141_3884              | 7820  | 13 | 2 | 0  | Low-quality | 11.01 |
| Sample_C1C_k141_59463             | 15109 | 14 | 2 | 6  | Low-quality | 11    |
| Sample_C6C_k141_6506              | 24929 | 29 | 1 | 23 | Low-quality | 11    |



|                                   |        |     |   |     |             |       |
|-----------------------------------|--------|-----|---|-----|-------------|-------|
| Sample_C12B_k141_68619            | 7735   | 11  | 0 | 0   | Low-quality | 11    |
| Sample_C13C_k141_95394            | 6703   | 9   | 5 | 0   | Low-quality | 11    |
| Sample_C1A_k141_263162            | 8459   | 14  | 1 | 0   | Low-quality | 11    |
| Sample_C2A_k141_119701            | 5232   | 11  | 3 | 0   | Low-quality | 11    |
| Sample_T1A_k141_46527             | 6775   | 9   | 9 | 0   | Low-quality | 11    |
| Sample_T14A_k141_214212           | 5111   | 6   | 0 | 1   | Low-quality | 10.99 |
| Sample_T2B_k141_109166            | 10811  | 5   | 0 | 1   | Low-quality | 10.99 |
| Sample_C4C_k141_50937             | 22402  | 22  | 0 | 14  | Low-quality | 10.98 |
| Sample_T4B_k141_105711            | 9706   | 4   | 0 | 4   | Low-quality | 10.98 |
| Sample_C1B_k141_109345            | 12892  | 12  | 4 | 0   | Low-quality | 10.98 |
| Sample_C3C_k141_3367              | 5402   | 6   | 0 | 0   | Low-quality | 10.98 |
| Sample_T17B_k141_8485             | 7257   | 7   | 1 | 1   | Low-quality | 10.98 |
| Sample_T7A_k141_102203            | 6622   | 8   | 5 | 0   | Low-quality | 10.98 |
| Sample_C10A_k141_218671           | 7052   | 10  | 4 | 0   | Low-quality | 10.97 |
| Sample_C4C_k141_4345              | 16801  | 20  | 0 | 10  | Low-quality | 10.97 |
| Sample_C2B_k141_260344            | 5424   | 6   | 3 | 0   | Low-quality | 10.97 |
| Sample_T14A_k141_60726            | 19416  | 25  | 8 | 1   | Low-quality | 10.97 |
| Sample_T7B_k141_109701            | 5517   | 6   | 1 | 0   | Low-quality | 10.97 |
| Sample_C6B_k141_217612            | 18741  | 20  | 1 | 12  | Low-quality | 10.96 |
| Sample_T8A_k141_241781            | 10721  | 11  | 0 | 3   | Low-quality | 10.96 |
| Sample_C9B_k141_54692             | 6319   | 10  | 5 | 1   | Low-quality | 10.96 |
| Sample_T4C_k141_60573             | 8594   | 7   | 1 | 4   | Low-quality | 10.95 |
| Sample_T6B_k141_63119             | 19789  | 27  | 1 | 1   | Low-quality | 10.95 |
| Sample_C14A_k141_197335           | 6196   | 4   | 0 | 0   | Low-quality | 10.95 |
| Sample_C3A_k141_213119            | 6638   | 8   | 7 | 0   | Low-quality | 10.95 |
| Sample_C9A_k141_70860_fragment_1  | 5978   | 10  | 1 | 1   | Low-quality | 10.95 |
| Sample_C8B_k141_126564            | 174385 | 173 | 3 | 130 | Low-quality | 10.94 |
| Sample_T2C_k141_215745            | 5084   | 6   | 0 | 0   | Low-quality | 10.94 |
| Sample_C8A_k141_80244             | 5719   | 12  | 7 | 1   | Low-quality | 10.94 |
| Sample_T12B_k141_135477           | 6103   | 6   | 0 | 1   | Low-quality | 10.94 |
| Sample_T12C_k141_149406           | 5511   | 7   | 0 | 0   | Low-quality | 10.94 |
| Sample_T15A_k141_56409            | 5178   | 8   | 3 | 0   | Low-quality | 10.94 |
| Sample_T15B_k141_16310_fragment_1 | 16898  | 17  | 1 | 2   | Low-quality | 10.94 |
| Sample_T18C_k141_80709            | 9010   | 12  | 0 | 1   | Low-quality | 10.94 |
| Sample_T8A_k141_109452            | 6103   | 10  | 0 | 0   | Low-quality | 10.93 |
| Sample_C1A_k141_160808            | 6818   | 9   | 1 | 0   | Low-quality | 10.93 |
| Sample_C6A_k141_36374             | 7214   | 10  | 1 | 0   | Low-quality | 10.92 |
| Sample_T11B_k141_146659           | 9253   | 9   | 0 | 2   | Low-quality | 10.92 |
| Sample_T7C_k141_72347             | 8238   | 6   | 0 | 1   | Low-quality | 10.92 |

|                         |       |    |   |    |             |       |
|-------------------------|-------|----|---|----|-------------|-------|
| Sample_C13B_k141_38952  | 6354  | 5  | 1 | 0  | Low-quality | 10.91 |
| Sample_T17C_k141_6150   | 5749  | 10 | 0 | 0  | Low-quality | 10.91 |
| Sample_C1B_k141_71236   | 14846 | 21 | 0 | 1  | Low-quality | 10.91 |
| Sample_C8B_k141_81377   | 5705  | 11 | 5 | 0  | Low-quality | 10.91 |
| Sample_T8A_k141_179071  | 8907  | 10 | 0 | 4  | Low-quality | 10.9  |
| Sample_C6A_k141_224157  | 8167  | 13 | 4 | 1  | Low-quality | 10.9  |
| Sample_T6B_k141_12917   | 7914  | 13 | 4 | 0  | Low-quality | 10.9  |
| Sample_C4B_k141_132337  | 5165  | 7  | 6 | 0  | Low-quality | 10.89 |
| Sample_T6A_k141_141137  | 5966  | 7  | 1 | 1  | Low-quality | 10.88 |
| Sample_C11A_k141_23624  | 6707  | 10 | 3 | 0  | Low-quality | 10.88 |
| Sample_C10A_k141_286443 | 5180  | 9  | 0 | 0  | Low-quality | 10.87 |
| Sample_C11C_k141_105298 | 5981  | 6  | 1 | 0  | Low-quality | 10.87 |
| Sample_C1A_k141_262670  | 5396  | 7  | 0 | 0  | Low-quality | 10.87 |
| Sample_T6C_k141_101579  | 17134 | 19 | 1 | 12 | Low-quality | 10.87 |
| Sample_C14A_k141_56079  | 7317  | 7  | 3 | 0  | Low-quality | 10.87 |
| Sample_C1C_k141_138567  | 6405  | 6  | 0 | 0  | Low-quality | 10.87 |
| Sample_T6A_k141_42310   | 12142 | 15 | 1 | 2  | Low-quality | 10.87 |
| Sample_T12B_k141_26454  | 6633  | 6  | 0 | 2  | Low-quality | 10.86 |
| Sample_T6C_k141_201251  | 7179  | 9  | 1 | 3  | Low-quality | 10.86 |
| Sample_C3A_k141_122814  | 6791  | 13 | 8 | 0  | Low-quality | 10.86 |
| Sample_C4B_k141_232     | 5622  | 12 | 2 | 0  | Low-quality | 10.86 |
| Sample_T13B_k141_108011 | 5030  | 8  | 2 | 0  | Low-quality | 10.86 |
| Sample_T7B_k141_109887  | 7176  | 11 | 1 | 0  | Low-quality | 10.86 |
| Sample_C4A_k141_60278   | 18001 | 15 | 0 | 10 | Low-quality | 10.85 |
| Sample_C4B_k141_111853  | 5307  | 4  | 0 | 3  | Low-quality | 10.85 |
| Sample_C8B_k141_93043   | 8389  | 12 | 0 | 7  | Low-quality | 10.85 |
| Sample_T18B_k141_47990  | 8900  | 8  | 2 | 2  | Low-quality | 10.85 |
| Sample_T4A_k141_37789   | 22093 | 21 | 1 | 4  | Low-quality | 10.84 |
| Sample_T7B_k141_118504  | 10736 | 12 | 3 | 0  | Low-quality | 10.84 |
| Sample_T18C_k141_70536  | 7505  | 8  | 0 | 0  | Low-quality | 10.83 |
| Sample_T8B_k141_133845  | 8908  | 10 | 4 | 1  | Low-quality | 10.83 |
| Sample_C2B_k141_330272  | 6024  | 4  | 0 | 4  | Low-quality | 10.82 |
| Sample_T11B_k141_2071   | 5150  | 6  | 0 | 2  | Low-quality | 10.82 |
| Sample_T5B_k141_58422   | 11227 | 14 | 0 | 4  | Low-quality | 10.82 |
| Sample_C1B_k141_178397  | 5805  | 8  | 2 | 0  | Low-quality | 10.82 |
| Sample_C6C_k141_233948  | 5237  | 5  | 1 | 0  | Low-quality | 10.82 |
| Sample_T14B_k141_144791 | 6062  | 11 | 2 | 0  | Low-quality | 10.82 |
| Sample_C12B_k141_86779  | 20930 | 15 | 1 | 4  | Low-quality | 10.81 |
| Sample_T13B_k141_19855  | 6472  | 11 | 0 | 1  | Low-quality | 10.81 |

|                                    |       |    |   |    |             |       |
|------------------------------------|-------|----|---|----|-------------|-------|
| Sample_C4C_k141_40129              | 5802  | 8  | 2 | 0  | Low-quality | 10.81 |
| Sample_T12B_k141_122960_fragment_1 | 7388  | 10 | 2 | 0  | Low-quality | 10.81 |
| Sample_C9C_k141_17553              | 7736  | 6  | 0 | 1  | Low-quality | 10.8  |
| Sample_T15C_k141_45866             | 5399  | 7  | 1 | 0  | Low-quality | 10.8  |
| Sample_T13B_k141_181728            | 7239  | 6  | 2 | 0  | Low-quality | 10.79 |
| Sample_T7A_k141_49753              | 5329  | 12 | 4 | 1  | Low-quality | 10.79 |
| Sample_T11C_k141_125662            | 8009  | 10 | 0 | 6  | Low-quality | 10.78 |
| Sample_T6A_k141_12347              | 17355 | 42 | 0 | 0  | Low-quality | 10.78 |
| Sample_C1B_k141_175648             | 6939  | 9  | 0 | 1  | Low-quality | 10.78 |
| Sample_C1B_k141_214568             | 5588  | 4  | 0 | 0  | Low-quality | 10.78 |
| Sample_C2A_k141_327944             | 16317 | 29 | 3 | 0  | Low-quality | 10.78 |
| Sample_T14B_k141_193458            | 12333 | 13 | 2 | 0  | Low-quality | 10.78 |
| Sample_C14C_k141_19357             | 11988 | 7  | 0 | 1  | Low-quality | 10.77 |
| Sample_C13C_k141_4619              | 9466  | 7  | 4 | 1  | Low-quality | 10.77 |
| Sample_C3A_k141_255007_fragment_1  | 11721 | 17 | 6 | 0  | Low-quality | 10.77 |
| Sample_C3B_k141_249871             | 6209  | 17 | 1 | 0  | Low-quality | 10.77 |
| Sample_C4B_k141_66851              | 8579  | 7  | 0 | 1  | Low-quality | 10.77 |
| Sample_T12C_k141_39889             | 5472  | 8  | 0 | 1  | Low-quality | 10.77 |
| Sample_C14A_k141_51942             | 11820 | 15 | 1 | 3  | Low-quality | 10.76 |
| Sample_C7A_k141_8656               | 21945 | 23 | 1 | 1  | Low-quality | 10.76 |
| Sample_C8B_k141_45123              | 19500 | 15 | 0 | 11 | Low-quality | 10.76 |
| Sample_C9B_k141_75709              | 26468 | 31 | 1 | 3  | Low-quality | 10.76 |
| Sample_T15A_k141_22825             | 6427  | 9  | 0 | 2  | Low-quality | 10.76 |
| Sample_T18C_k141_142730            | 8790  | 14 | 0 | 1  | Low-quality | 10.76 |
| Sample_C11C_k141_79030             | 10093 | 14 | 0 | 1  | Low-quality | 10.75 |
| Sample_C6C_k141_183007             | 37051 | 32 | 0 | 25 | Low-quality | 10.75 |
| Sample_T12A_k141_9243              | 22154 | 18 | 0 | 15 | Low-quality | 10.75 |
| Sample_T12A_k141_329107            | 18761 | 23 | 0 | 16 | Low-quality | 10.75 |
| Sample_C5A_k141_234515_fragment_1  | 7183  | 11 | 1 | 1  | Low-quality | 10.75 |
| Sample_T14C_k141_51397             | 6520  | 7  | 0 | 2  | Low-quality | 10.75 |
| Sample_C11B_k141_117528            | 5865  | 6  | 0 | 2  | Low-quality | 10.74 |
| Sample_T15B_k141_127992            | 11671 | 7  | 0 | 1  | Low-quality | 10.74 |
| Sample_C6B_k141_180369             | 9849  | 12 | 0 | 4  | Low-quality | 10.73 |
| Sample_T2C_k141_61808              | 6535  | 11 | 1 | 2  | Low-quality | 10.73 |
| Sample_C11C_k141_140085            | 10553 | 6  | 0 | 1  | Low-quality | 10.72 |
| Sample_T10A_k141_96357             | 6418  | 10 | 0 | 1  | Low-quality | 10.72 |
| Sample_C3A_k141_241766             | 7111  | 12 | 4 | 0  | Low-quality | 10.72 |
| Sample_T7A_k141_120787             | 5522  | 4  | 0 | 2  | Low-quality | 10.71 |
| Sample_T14C_k141_138               | 5574  | 12 | 1 | 0  | Low-quality | 10.71 |

|                                   |       |    |   |    |             |       |
|-----------------------------------|-------|----|---|----|-------------|-------|
| Sample_C3B_k141_95206             | 6565  | 9  | 0 | 3  | Low-quality | 10.7  |
| Sample_C6C_k141_172435            | 36183 | 32 | 1 | 18 | Low-quality | 10.7  |
| Sample_T14A_k141_228429           | 18680 | 18 | 0 | 17 | Low-quality | 10.7  |
| Sample_T1C_k141_59755             | 15953 | 21 | 1 | 0  | Low-quality | 10.7  |
| Sample_C6C_k141_126949            | 10921 | 7  | 0 | 1  | Low-quality | 10.7  |
| Sample_T11B_k141_62063            | 5198  | 4  | 1 | 0  | Low-quality | 10.7  |
| Sample_C3A_k141_251233            | 13611 | 12 | 1 | 2  | Low-quality | 10.69 |
| Sample_T1B_k141_1942              | 19807 | 17 | 0 | 14 | Low-quality | 10.69 |
| Sample_C10B_k141_35500            | 6465  | 8  | 5 | 0  | Low-quality | 10.69 |
| Sample_C2B_k141_316572_fragment_1 | 5946  | 10 | 0 | 0  | Low-quality | 10.69 |
| Sample_T10B_k141_49163_fragment_1 | 14895 | 16 | 1 | 2  | Low-quality | 10.69 |
| Sample_T12A_k141_219241           | 18972 | 17 | 0 | 12 | Low-quality | 10.68 |
| Sample_T3C_k141_7304              | 9151  | 10 | 1 | 4  | Low-quality | 10.68 |
| Sample_T6A_k141_233075            | 26602 | 33 | 1 | 5  | Low-quality | 10.68 |
| Sample_T15A_k141_101689           | 5906  | 6  | 3 | 0  | Low-quality | 10.68 |
| Sample_T5C_k141_25455             | 5036  | 7  | 3 | 0  | Low-quality | 10.68 |
| Sample_T8B_k141_141326            | 5744  | 7  | 0 | 0  | Low-quality | 10.68 |
| Sample_T12A_k141_107655           | 8050  | 3  | 0 | 1  | Low-quality | 10.67 |
| Sample_T17B_k141_11804            | 5569  | 9  | 3 | 0  | Low-quality | 10.67 |
| Sample_C7A_k141_177230            | 6271  | 7  | 0 | 4  | Low-quality | 10.66 |
| Sample_C7C_k141_36730             | 5353  | 6  | 1 | 1  | Low-quality | 10.66 |
| Sample_T12C_k141_164788           | 5582  | 10 | 0 | 2  | Low-quality | 10.66 |
| Sample_T8B_k141_88917             | 21729 | 25 | 1 | 3  | Low-quality | 10.66 |
| Sample_T8C_k141_51982             | 8641  | 9  | 0 | 2  | Low-quality | 10.66 |
| Sample_C12B_k141_140393           | 5044  | 9  | 8 | 0  | Low-quality | 10.66 |
| Sample_C4C_k141_81035             | 7837  | 17 | 8 | 0  | Low-quality | 10.66 |
| Sample_C7C_k141_50273             | 6834  | 6  | 1 | 0  | Low-quality | 10.66 |
| Sample_C8B_k141_194915            | 7427  | 21 | 2 | 0  | Low-quality | 10.66 |
| Sample_T2B_k141_305057            | 5082  | 9  | 1 | 0  | Low-quality | 10.66 |
| Sample_T12C_k141_52625            | 15602 | 19 | 2 | 5  | Low-quality | 10.65 |
| Sample_C3A_k141_157929            | 6729  | 11 | 3 | 0  | Low-quality | 10.65 |
| Sample_C4B_k141_25666             | 6558  | 15 | 2 | 1  | Low-quality | 10.65 |
| Sample_T14C_k141_58241_fragment_1 | 5691  | 9  | 2 | 0  | Low-quality | 10.65 |
| Sample_C6B_k141_59641             | 8225  | 8  | 0 | 6  | Low-quality | 10.64 |
| Sample_T16B_k141_2819             | 6370  | 9  | 0 | 1  | Low-quality | 10.64 |
| Sample_C12C_k141_55055            | 7669  | 6  | 0 | 4  | Low-quality | 10.64 |
| Sample_C11C_k141_69846            | 12221 | 12 | 0 | 7  | Low-quality | 10.63 |
| Sample_C3A_k141_26979             | 12293 | 17 | 1 | 1  | Low-quality | 10.63 |
| Sample_C8A_k141_177341            | 8686  | 10 | 0 | 4  | Low-quality | 10.63 |

|                         |       |    |   |    |             |       |
|-------------------------|-------|----|---|----|-------------|-------|
| Sample_C3C_k141_74982   | 5539  | 12 | 3 | 0  | Low-quality | 10.63 |
| Sample_T15B_k141_67951  | 5759  | 11 | 0 | 0  | Low-quality | 10.63 |
| Sample_C9B_k141_38      | 6218  | 8  | 1 | 0  | Low-quality | 10.62 |
| Sample_T16C_k141_114670 | 5270  | 7  | 0 | 0  | Low-quality | 10.62 |
| Sample_T2C_k141_121839  | 6179  | 9  | 0 | 1  | Low-quality | 10.62 |
| Sample_C8C_k141_97399   | 7967  | 22 | 1 | 0  | Low-quality | 10.62 |
| Sample_T18A_k141_68180  | 6181  | 11 | 3 | 0  | Low-quality | 10.62 |
| Sample_T2A_k141_57641   | 5155  | 10 | 8 | 0  | Low-quality | 10.62 |
| Sample_C7B_k141_135738  | 5272  | 6  | 1 | 0  | Low-quality | 10.61 |
| Sample_T8B_k141_215512  | 5031  | 12 | 1 | 0  | Low-quality | 10.61 |
| Sample_T14C_k141_39973  | 12363 | 12 | 0 | 3  | Low-quality | 10.6  |
| Sample_T17C_k141_37585  | 6347  | 7  | 0 | 3  | Low-quality | 10.6  |
| Sample_C11A_k141_118592 | 5102  | 13 | 2 | 0  | Low-quality | 10.6  |
| Sample_C2C_k141_44698   | 10937 | 6  | 0 | 6  | Low-quality | 10.59 |
| Sample_C2C_k141_174499  | 14857 | 17 | 1 | 1  | Low-quality | 10.59 |
| Sample_C5A_k141_88745   | 6343  | 7  | 0 | 2  | Low-quality | 10.59 |
| Sample_T10A_k141_113146 | 16284 | 15 | 0 | 14 | Low-quality | 10.59 |
| Sample_T8B_k141_203634  | 5288  | 7  | 1 | 0  | Low-quality | 10.59 |
| Sample_T14A_k141_205260 | 8877  | 9  | 0 | 2  | Low-quality | 10.58 |
| Sample_C2A_k141_98847   | 8981  | 13 | 4 | 0  | Low-quality | 10.58 |
| Sample_C2C_k141_283766  | 10493 | 6  | 1 | 0  | Low-quality | 10.58 |
| Sample_C5C_k141_5767    | 5625  | 9  | 6 | 0  | Low-quality | 10.58 |
| Sample_C5B_k141_620     | 7794  | 7  | 0 | 1  | Low-quality | 10.57 |
| Sample_T15B_k141_14553  | 5037  | 13 | 1 | 0  | Low-quality | 10.57 |
| Sample_T2C_k141_124255  | 6147  | 14 | 2 | 0  | Low-quality | 10.57 |
| Sample_C4C_k141_5105    | 6867  | 7  | 0 | 0  | Low-quality | 10.56 |
| Sample_C4C_k141_193982  | 11397 | 10 | 1 | 2  | Low-quality | 10.56 |
| Sample_T12C_k141_46424  | 6061  | 7  | 0 | 0  | Low-quality | 10.56 |
| Sample_T2B_k141_68293   | 5915  | 10 | 3 | 0  | Low-quality | 10.56 |
| Sample_T7C_k141_17824   | 6411  | 10 | 0 | 0  | Low-quality | 10.56 |
| Sample_C12A_k141_193606 | 6970  | 7  | 1 | 0  | Low-quality | 10.55 |
| Sample_C6C_k141_35930   | 9689  | 10 | 0 | 7  | Low-quality | 10.55 |
| Sample_T11C_k141_152719 | 7816  | 12 | 3 | 1  | Low-quality | 10.55 |
| Sample_T13C_k141_77708  | 6772  | 12 | 1 | 1  | Low-quality | 10.55 |
| Sample_T18C_k141_128448 | 19458 | 25 | 1 | 2  | Low-quality | 10.55 |
| Sample_T4B_k141_89392   | 10623 | 10 | 0 | 3  | Low-quality | 10.55 |
| Sample_C3A_k141_170552  | 14164 | 8  | 2 | 1  | Low-quality | 10.55 |
| Sample_T13B_k141_25618  | 5995  | 10 | 2 | 0  | Low-quality | 10.55 |
| Sample_T17A_k141_14664  | 5221  | 9  | 1 | 0  | Low-quality | 10.55 |

|                                    |       |    |   |    |             |       |
|------------------------------------|-------|----|---|----|-------------|-------|
| Sample_T6C_k141_213304             | 6380  | 18 | 3 | 1  | Low-quality | 10.55 |
| Sample_C4C_k141_60236              | 7132  | 7  | 0 | 4  | Low-quality | 10.54 |
| Sample_C11A_k141_107131            | 5740  | 6  | 0 | 1  | Low-quality | 10.54 |
| Sample_C2A_k141_162545             | 7965  | 13 | 1 | 1  | Low-quality | 10.54 |
| Sample_C3C_k141_193735             | 6070  | 16 | 3 | 0  | Low-quality | 10.54 |
| Sample_T5A_k141_6074               | 7762  | 10 | 3 | 2  | Low-quality | 10.54 |
| Sample_C5C_k141_111749             | 5232  | 7  | 4 | 0  | Low-quality | 10.53 |
| Sample_C7A_k141_787                | 8668  | 5  | 3 | 0  | Low-quality | 10.53 |
| Sample_T3C_k141_72626              | 7260  | 7  | 0 | 0  | Low-quality | 10.53 |
| Sample_T16C_k141_16622             | 21492 | 18 | 1 | 15 | Low-quality | 10.52 |
| Sample_T3A_k141_54443              | 5757  | 7  | 0 | 1  | Low-quality | 10.52 |
| Sample_T11B_k141_146996            | 6307  | 7  | 0 | 0  | Low-quality | 10.52 |
| Sample_T12A_k141_156770            | 5701  | 4  | 2 | 0  | Low-quality | 10.52 |
| Sample_T15A_k141_113721            | 6748  | 9  | 0 | 0  | Low-quality | 10.52 |
| Sample_T16A_k141_134102            | 6261  | 8  | 0 | 0  | Low-quality | 10.52 |
| Sample_T16B_k141_127735            | 5439  | 4  | 4 | 0  | Low-quality | 10.52 |
| Sample_C5A_k141_234159             | 65812 | 65 | 0 | 50 | Low-quality | 10.51 |
| Sample_C12A_k141_142220_fragment_1 | 15154 | 14 | 2 | 1  | Low-quality | 10.51 |
| Sample_T12B_k141_138474            | 5631  | 12 | 5 | 0  | Low-quality | 10.51 |
| Sample_T5A_k141_39330              | 9706  | 13 | 6 | 0  | Low-quality | 10.51 |
| Sample_C9C_k141_49556              | 15274 | 22 | 0 | 3  | Low-quality | 10.5  |
| Sample_T10A_k141_124599            | 6286  | 7  | 0 | 1  | Low-quality | 10.5  |
| Sample_T11C_k141_81363             | 7191  | 11 | 0 | 1  | Low-quality | 10.5  |
| Sample_T12A_k141_280954            | 20346 | 16 | 1 | 10 | Low-quality | 10.5  |
| Sample_C10C_k141_183859            | 8844  | 12 | 0 | 0  | Low-quality | 10.5  |
| Sample_T5A_k141_19383              | 6892  | 10 | 8 | 0  | Low-quality | 10.5  |
| Sample_C10A_k141_297942            | 5160  | 4  | 0 | 0  | Low-quality | 10.49 |
| Sample_C12A_k141_197491            | 7468  | 7  | 1 | 1  | Low-quality | 10.49 |
| Sample_C2A_k141_217611             | 5036  | 12 | 1 | 0  | Low-quality | 10.49 |
| Sample_T12A_k141_52221             | 10189 | 11 | 0 | 0  | Low-quality | 10.49 |
| Sample_T12A_k141_338323            | 7461  | 15 | 5 | 0  | Low-quality | 10.49 |
| Sample_T2B_k141_45058              | 6096  | 11 | 1 | 0  | Low-quality | 10.49 |
| Sample_T10B_k141_32600             | 8572  | 2  | 1 | 0  | Low-quality | 10.48 |
| Sample_C8C_k141_159076             | 5976  | 4  | 0 | 3  | Low-quality | 10.47 |
| Sample_T18B_k141_4075              | 9226  | 13 | 1 | 4  | Low-quality | 10.47 |
| Sample_T8C_k141_62371              | 6271  | 13 | 0 | 0  | Low-quality | 10.47 |
| Sample_T3A_k141_49342              | 5499  | 11 | 1 | 0  | Low-quality | 10.47 |
| Sample_T8C_k141_204428             | 5256  | 9  | 4 | 0  | Low-quality | 10.47 |
| Sample_T16B_k141_131425            | 6701  | 8  | 1 | 5  | Low-quality | 10.46 |

|                         |       |    |   |    |             |       |
|-------------------------|-------|----|---|----|-------------|-------|
| Sample_T2A_k141_278784  | 5742  | 3  | 0 | 1  | Low-quality | 10.46 |
| Sample_T8C_k141_115538  | 5223  | 11 | 1 | 2  | Low-quality | 10.46 |
| Sample_C6C_k141_98755   | 6299  | 7  | 5 | 0  | Low-quality | 10.46 |
| Sample_C8B_k141_112630  | 5515  | 11 | 0 | 0  | Low-quality | 10.46 |
| Sample_T16C_k141_110290 | 6123  | 5  | 1 | 0  | Low-quality | 10.46 |
| Sample_C4A_k141_65995   | 7945  | 12 | 0 | 1  | Low-quality | 10.45 |
| Sample_T5A_k141_2767    | 8525  | 8  | 0 | 3  | Low-quality | 10.45 |
| Sample_C1B_k141_108956  | 10536 | 4  | 3 | 0  | Low-quality | 10.45 |
| Sample_C3A_k141_163207  | 5417  | 8  | 4 | 1  | Low-quality | 10.45 |
| Sample_C7C_k141_27917   | 5610  | 8  | 1 | 0  | Low-quality | 10.45 |
| Sample_T10B_k141_16625  | 5226  | 8  | 0 | 0  | Low-quality | 10.45 |
| Sample_C4B_k141_163832  | 6472  | 5  | 0 | 1  | Low-quality | 10.44 |
| Sample_C5A_k141_282766  | 14735 | 21 | 2 | 0  | Low-quality | 10.44 |
| Sample_C7C_k141_83546   | 6561  | 7  | 4 | 0  | Low-quality | 10.44 |
| Sample_C8B_k141_115961  | 7802  | 7  | 0 | 0  | Low-quality | 10.44 |
| Sample_T14B_k141_141330 | 17986 | 26 | 5 | 1  | Low-quality | 10.44 |
| Sample_C12A_k141_108115 | 20096 | 15 | 0 | 13 | Low-quality | 10.43 |
| Sample_T16B_k141_87315  | 16570 | 26 | 0 | 0  | Low-quality | 10.43 |
| Sample_T14B_k141_26743  | 5722  | 9  | 2 | 0  | Low-quality | 10.43 |
| Sample_T8C_k141_77862   | 8273  | 15 | 1 | 0  | Low-quality | 10.43 |
| Sample_C13A_k141_15570  | 18193 | 24 | 0 | 17 | Low-quality | 10.42 |
| Sample_C5A_k141_266129  | 6738  | 9  | 0 | 1  | Low-quality | 10.42 |
| Sample_T12C_k141_150122 | 5813  | 6  | 0 | 1  | Low-quality | 10.42 |
| Sample_T2C_k141_117792  | 7987  | 11 | 1 | 1  | Low-quality | 10.42 |
| Sample_C2C_k141_68794   | 11017 | 10 | 1 | 0  | Low-quality | 10.42 |
| Sample_T6A_k141_147216  | 19043 | 46 | 1 | 0  | Low-quality | 10.42 |
| Sample_C4C_k141_38566   | 7426  | 9  | 1 | 2  | Low-quality | 10.41 |
| Sample_T12A_k141_46685  | 11336 | 10 | 0 | 5  | Low-quality | 10.41 |
| Sample_T16B_k141_53057  | 7243  | 10 | 0 | 4  | Low-quality | 10.41 |
| Sample_T2B_k141_151162  | 5342  | 3  | 2 | 0  | Low-quality | 10.41 |
| Sample_C8C_k141_110770  | 8309  | 6  | 0 | 2  | Low-quality | 10.4  |
| Sample_T14A_k141_180327 | 6017  | 7  | 0 | 1  | Low-quality | 10.4  |
| Sample_T3C_k141_59509   | 39036 | 34 | 0 | 23 | Low-quality | 10.4  |
| Sample_C6B_k141_203082  | 6222  | 12 | 0 | 3  | Low-quality | 10.39 |
| Sample_T11B_k141_146506 | 6626  | 11 | 0 | 5  | Low-quality | 10.39 |
| Sample_C2B_k141_318492  | 5445  | 6  | 3 | 0  | Low-quality | 10.39 |
| Sample_T8B_k141_278685  | 5676  | 15 | 1 | 0  | Low-quality | 10.39 |
| Sample_T17B_k141_32999  | 20832 | 19 | 2 | 2  | Low-quality | 10.38 |
| Sample_T13B_k141_159368 | 8545  | 7  | 3 | 1  | Low-quality | 10.38 |

|                                   |       |    |   |    |             |       |
|-----------------------------------|-------|----|---|----|-------------|-------|
| Sample_C7C_k141_44225             | 9064  | 13 | 0 | 2  | Low-quality | 10.37 |
| Sample_T12B_k141_19977            | 8629  | 7  | 0 | 1  | Low-quality | 10.37 |
| Sample_C11C_k141_13401            | 29084 | 24 | 1 | 6  | Low-quality | 10.36 |
| Sample_C2B_k141_80952             | 5708  | 7  | 0 | 2  | Low-quality | 10.36 |
| Sample_C4A_k141_15465             | 6776  | 10 | 2 | 0  | Low-quality | 10.36 |
| Sample_T3B_k141_57977             | 7623  | 8  | 0 | 2  | Low-quality | 10.36 |
| Sample_T6B_k141_148287            | 16013 | 18 | 1 | 4  | Low-quality | 10.36 |
| Sample_C1A_k141_173110            | 9569  | 14 | 1 | 1  | Low-quality | 10.35 |
| Sample_C6B_k141_196406            | 8900  | 10 | 3 | 3  | Low-quality | 10.35 |
| Sample_C6B_k141_121585            | 8461  | 8  | 0 | 0  | Low-quality | 10.35 |
| Sample_T13B_k141_97246            | 18074 | 16 | 0 | 12 | Low-quality | 10.35 |
| Sample_T2B_k141_255639            | 6148  | 10 | 1 | 1  | Low-quality | 10.35 |
| Sample_T4B_k141_95416             | 25143 | 35 | 1 | 6  | Low-quality | 10.35 |
| Sample_C14A_k141_108148           | 5598  | 12 | 1 | 0  | Low-quality | 10.35 |
| Sample_C4B_k141_51654             | 5792  | 6  | 3 | 0  | Low-quality | 10.35 |
| Sample_T11C_k141_15278            | 6345  | 10 | 1 | 0  | Low-quality | 10.35 |
| Sample_T16A_k141_84965            | 5347  | 5  | 2 | 0  | Low-quality | 10.35 |
| Sample_C10A_k141_210664           | 14295 | 11 | 0 | 4  | Low-quality | 10.34 |
| Sample_C2B_k141_138812            | 7771  | 3  | 0 | 1  | Low-quality | 10.34 |
| Sample_C3A_k141_62053             | 14966 | 14 | 1 | 4  | Low-quality | 10.34 |
| Sample_C5A_k141_43035             | 11605 | 10 | 0 | 4  | Low-quality | 10.34 |
| Sample_C9B_k141_88014             | 22297 | 38 | 1 | 1  | Low-quality | 10.34 |
| Sample_T14B_k141_88948            | 25091 | 28 | 1 | 7  | Low-quality | 10.34 |
| Sample_C4A_k141_44749             | 5604  | 13 | 1 | 0  | Low-quality | 10.34 |
| Sample_C6C_k141_70563             | 11342 | 13 | 1 | 3  | Low-quality | 10.33 |
| Sample_T4B_k141_154996            | 9531  | 19 | 2 | 1  | Low-quality | 10.33 |
| Sample_C1C_k141_114953            | 11815 | 17 | 2 | 0  | Low-quality | 10.32 |
| Sample_T10B_k141_60492            | 7834  | 1  | 0 | 0  | Low-quality | 10.32 |
| Sample_T14A_k141_10559            | 13317 | 8  | 0 | 6  | Low-quality | 10.32 |
| Sample_T4B_k141_252660            | 8433  | 10 | 0 | 2  | Low-quality | 10.32 |
| Sample_T8C_k141_179460_fragment_1 | 9793  | 11 | 1 | 1  | Low-quality | 10.32 |
| Sample_T16B_k141_84288            | 5962  | 9  | 0 | 5  | Low-quality | 10.31 |
| Sample_T7A_k141_39628             | 5359  | 6  | 0 | 1  | Low-quality | 10.31 |
| Sample_C14B_k141_57344            | 15846 | 11 | 1 | 0  | Low-quality | 10.31 |
| Sample_C4C_k141_26448             | 6867  | 3  | 2 | 1  | Low-quality | 10.3  |
| Sample_T12C_k141_183637           | 6493  | 7  | 0 | 2  | Low-quality | 10.3  |
| Sample_T7B_k141_35851             | 10009 | 4  | 0 | 1  | Low-quality | 10.3  |
| Sample_C3A_k141_18533             | 6697  | 11 | 5 | 0  | Low-quality | 10.3  |
| Sample_C3C_k141_223757            | 5093  | 8  | 1 | 0  | Low-quality | 10.3  |



|                                    |       |    |   |    |             |       |
|------------------------------------|-------|----|---|----|-------------|-------|
| Sample_T7A_k141_228001             | 5739  | 13 | 2 | 0  | Low-quality | 10.3  |
| Sample_T8A_k141_21267              | 6162  | 15 | 1 | 0  | Low-quality | 10.3  |
| Sample_C12C_k141_176472            | 5757  | 5  | 0 | 0  | Low-quality | 10.29 |
| Sample_C9A_k141_100938             | 12544 | 15 | 2 | 3  | Low-quality | 10.29 |
| Sample_T12C_k141_177185            | 8785  | 12 | 0 | 1  | Low-quality | 10.29 |
| Sample_C3A_k141_78725_fragment_1   | 7655  | 10 | 1 | 1  | Low-quality | 10.29 |
| Sample_T12A_k141_304198            | 5649  | 6  | 0 | 0  | Low-quality | 10.29 |
| Sample_T12A_k141_4908              | 6599  | 9  | 0 | 0  | Low-quality | 10.29 |
| Sample_C11C_k141_126420            | 5737  | 12 | 1 | 0  | Low-quality | 10.28 |
| Sample_C13A_k141_88681             | 5029  | 11 | 1 | 0  | Low-quality | 10.28 |
| Sample_T11A_k141_97773             | 5442  | 6  | 2 | 0  | Low-quality | 10.28 |
| Sample_C6C_k141_151734             | 6900  | 11 | 1 | 6  | Low-quality | 10.27 |
| Sample_T14B_k141_13996             | 16793 | 13 | 2 | 0  | Low-quality | 10.27 |
| Sample_C1C_k141_169557             | 8514  | 5  | 0 | 0  | Low-quality | 10.26 |
| Sample_C5B_k141_81890              | 15471 | 19 | 0 | 6  | Low-quality | 10.26 |
| Sample_C9B_k141_64129              | 6071  | 10 | 5 | 0  | Low-quality | 10.26 |
| Sample_C8A_k141_72717              | 6235  | 8  | 0 | 5  | Low-quality | 10.25 |
| Sample_C13C_k141_91420             | 6173  | 6  | 1 | 1  | Low-quality | 10.25 |
| Sample_C8B_k141_144874             | 7032  | 11 | 1 | 0  | Low-quality | 10.25 |
| Sample_C2C_k141_129601             | 18875 | 25 | 1 | 3  | Low-quality | 10.24 |
| Sample_C8A_k141_164890             | 5479  | 4  | 1 | 0  | Low-quality | 10.24 |
| Sample_T3A_k141_97709              | 18599 | 25 | 0 | 15 | Low-quality | 10.24 |
| Sample_T3C_k141_122165             | 5882  | 5  | 0 | 1  | Low-quality | 10.24 |
| Sample_T7B_k141_49023              | 11062 | 7  | 0 | 2  | Low-quality | 10.23 |
| Sample_C11B_k141_208442            | 5938  | 11 | 2 | 0  | Low-quality | 10.23 |
| Sample_C12A_k141_7013              | 5453  | 5  | 0 | 0  | Low-quality | 10.23 |
| Sample_C13C_k141_74614             | 10175 | 18 | 2 | 0  | Low-quality | 10.23 |
| Sample_T16B_k141_46877             | 10032 | 17 | 0 | 0  | Low-quality | 10.23 |
| Sample_T7A_k141_176390_fragment_1  | 6238  | 9  | 6 | 0  | Low-quality | 10.23 |
| Sample_C14A_k141_111               | 6517  | 10 | 0 | 2  | Low-quality | 10.22 |
| Sample_C1A_k141_139417             | 6753  | 5  | 1 | 1  | Low-quality | 10.22 |
| Sample_T15A_k141_32393             | 10778 | 7  | 0 | 3  | Low-quality | 10.22 |
| Sample_T3B_k141_131320             | 5584  | 5  | 0 | 2  | Low-quality | 10.22 |
| Sample_C14A_k141_123368            | 5520  | 8  | 1 | 2  | Low-quality | 10.22 |
| Sample_C4C_k141_18562              | 5504  | 12 | 3 | 0  | Low-quality | 10.22 |
| Sample_C9A_k141_52107              | 6754  | 9  | 1 | 0  | Low-quality | 10.22 |
| Sample_C11A_k141_178451            | 5177  | 7  | 4 | 0  | Low-quality | 10.21 |
| Sample_T16A_k141_109149_fragment_1 | 8404  | 16 | 4 | 3  | Low-quality | 10.21 |
| Sample_T1B_k141_14686              | 7390  | 8  | 0 | 0  | Low-quality | 10.21 |

|                         |       |    |   |    |             |       |
|-------------------------|-------|----|---|----|-------------|-------|
| Sample_T6C_k141_174993  | 5091  | 7  | 3 | 0  | Low-quality | 10.21 |
| Sample_T6C_k141_86966   | 6177  | 13 | 2 | 0  | Low-quality | 10.21 |
| Sample_C8A_k141_46673   | 14157 | 15 | 1 | 3  | Low-quality | 10.2  |
| Sample_C10C_k141_191243 | 5975  | 10 | 2 | 0  | Low-quality | 10.2  |
| Sample_C5A_k141_191685  | 6786  | 7  | 0 | 0  | Low-quality | 10.2  |
| Sample_T13B_k141_50598  | 6933  | 5  | 3 | 0  | Low-quality | 10.19 |
| Sample_C10A_k141_145155 | 5696  | 6  | 1 | 3  | Low-quality | 10.18 |
| Sample_C11A_k141_13367  | 7971  | 8  | 0 | 1  | Low-quality | 10.18 |
| Sample_C11A_k141_58407  | 17763 | 21 | 0 | 18 | Low-quality | 10.17 |
| Sample_C14C_k141_48133  | 11537 | 13 | 0 | 7  | Low-quality | 10.17 |
| Sample_C1B_k141_93401   | 7821  | 5  | 0 | 1  | Low-quality | 10.17 |
| Sample_C1C_k141_24189   | 7301  | 7  | 0 | 2  | Low-quality | 10.17 |
| Sample_T7C_k141_150429  | 5167  | 7  | 0 | 1  | Low-quality | 10.17 |
| Sample_T8C_k141_8441    | 6441  | 3  | 0 | 0  | Low-quality | 10.17 |
| Sample_C8B_k141_85609   | 5329  | 5  | 4 | 0  | Low-quality | 10.17 |
| Sample_T11A_k141_13137  | 6989  | 9  | 0 | 2  | Low-quality | 10.17 |
| Sample_C3B_k141_126532  | 6083  | 9  | 1 | 0  | Low-quality | 10.16 |
| Sample_T11C_k141_43232  | 8303  | 10 | 0 | 3  | Low-quality | 10.16 |
| Sample_C10B_k141_61725  | 6147  | 7  | 2 | 0  | Low-quality | 10.16 |
| Sample_C5A_k141_221148  | 5801  | 10 | 2 | 0  | Low-quality | 10.16 |
| Sample_C8B_k141_190220  | 5149  | 4  | 2 | 0  | Low-quality | 10.16 |
| Sample_T10B_k141_16510  | 5474  | 12 | 0 | 0  | Low-quality | 10.16 |
| Sample_T7C_k141_92633   | 13535 | 14 | 7 | 0  | Low-quality | 10.16 |
| Sample_C2B_k141_116563  | 18723 | 26 | 1 | 2  | Low-quality | 10.15 |
| Sample_C8A_k141_167281  | 7271  | 17 | 4 | 0  | Low-quality | 10.15 |
| Sample_C8A_k141_157689  | 7966  | 6  | 2 | 0  | Low-quality | 10.15 |
| Sample_T10A_k141_38803  | 6019  | 6  | 5 | 0  | Low-quality | 10.15 |
| Sample_C1C_k141_93310   | 12433 | 14 | 0 | 7  | Low-quality | 10.14 |
| Sample_C7C_k141_23479   | 17864 | 31 | 6 | 0  | Low-quality | 10.14 |
| Sample_C11A_k141_84568  | 6489  | 7  | 1 | 0  | Low-quality | 10.13 |
| Sample_C11B_k141_25843  | 6073  | 12 | 0 | 0  | Low-quality | 10.12 |
| Sample_T18C_k141_131197 | 9631  | 20 | 5 | 2  | Low-quality | 10.12 |
| Sample_T5A_k141_45003   | 9504  | 13 | 6 | 1  | Low-quality | 10.12 |
| Sample_C10C_k141_53654  | 11815 | 16 | 0 | 3  | Low-quality | 10.11 |
| Sample_C4C_k141_242780  | 15599 | 15 | 0 | 5  | Low-quality | 10.11 |
| Sample_T12A_k141_252717 | 14254 | 23 | 3 | 8  | Low-quality | 10.11 |
| Sample_T5B_k141_77059   | 10976 | 11 | 0 | 6  | Low-quality | 10.11 |
| Sample_T16B_k141_80271  | 6218  | 6  | 2 | 2  | Low-quality | 10.11 |
| Sample_T7C_k141_68380   | 24655 | 19 | 7 | 1  | Low-quality | 10.11 |

|                         |       |    |   |    |             |       |
|-------------------------|-------|----|---|----|-------------|-------|
| Sample_T7A_k141_218296  | 14022 | 14 | 1 | 2  | Low-quality | 10.1  |
| Sample_C5C_k141_56830   | 5377  | 8  | 1 | 0  | Low-quality | 10.1  |
| Sample_T2C_k141_42460   | 22368 | 25 | 1 | 7  | Low-quality | 10.09 |
| Sample_C5C_k141_114608  | 5156  | 7  | 4 | 0  | Low-quality | 10.09 |
| Sample_T16C_k141_135774 | 6247  | 14 | 0 | 0  | Low-quality | 10.09 |
| Sample_T7A_k141_227182  | 6876  | 18 | 3 | 0  | Low-quality | 10.09 |
| Sample_T16C_k141_87745  | 9791  | 9  | 0 | 8  | Low-quality | 10.08 |
| Sample_C2B_k141_2315    | 5893  | 12 | 1 | 0  | Low-quality | 10.08 |
| Sample_C2B_k141_158753  | 5403  | 8  | 0 | 0  | Low-quality | 10.08 |
| Sample_T14A_k141_68811  | 6172  | 4  | 4 | 0  | Low-quality | 10.08 |
| Sample_C3B_k141_184467  | 5690  | 10 | 0 | 0  | Low-quality | 10.07 |
| Sample_C14A_k141_162772 | 10772 | 13 | 4 | 0  | Low-quality | 10.07 |
| Sample_C5A_k141_31776   | 5301  | 6  | 0 | 0  | Low-quality | 10.07 |
| Sample_C8A_k141_3930    | 5719  | 8  | 0 | 1  | Low-quality | 10.07 |
| Sample_T7B_k141_62867   | 8125  | 10 | 1 | 3  | Low-quality | 10.06 |
| Sample_T18B_k141_49297  | 8890  | 15 | 0 | 0  | Low-quality | 10.06 |
| Sample_T8C_k141_52583   | 5092  | 7  | 4 | 0  | Low-quality | 10.06 |
| Sample_T2A_k141_205334  | 17524 | 21 | 3 | 0  | Low-quality | 10.05 |
| Sample_C11B_k141_23217  | 13433 | 10 | 0 | 6  | Low-quality | 10.04 |
| Sample_C1B_k141_67391   | 10851 | 11 | 0 | 2  | Low-quality | 10.04 |
| Sample_T3A_k141_55188   | 53805 | 55 | 3 | 16 | Low-quality | 10.04 |
| Sample_T8C_k141_220767  | 15142 | 18 | 2 | 0  | Low-quality | 10.04 |
| Sample_C5A_k141_205989  | 5684  | 8  | 0 | 1  | Low-quality | 10.03 |
| Sample_C8B_k141_26442   | 6066  | 13 | 2 | 0  | Low-quality | 10.03 |
| Sample_T10B_k141_181447 | 5379  | 9  | 4 | 0  | Low-quality | 10.03 |
| Sample_T13C_k141_80106  | 6071  | 7  | 1 | 2  | Low-quality | 10.02 |
| Sample_T8A_k141_9983    | 5820  | 7  | 1 | 0  | Low-quality | 10.02 |
| Sample_T13B_k141_177176 | 54834 | 52 | 1 | 37 | Low-quality | 10.01 |
| Sample_T14B_k141_164611 | 20057 | 15 | 1 | 8  | Low-quality | 10.01 |
| Sample_T6A_k141_248735  | 5343  | 6  | 1 | 3  | Low-quality | 10.01 |
| Sample_C3C_k141_122200  | 6854  | 9  | 2 | 1  | Low-quality | 10.01 |
| Sample_C7C_k141_86355   | 11824 | 17 | 2 | 0  | Low-quality | 10.01 |
| Sample_T13B_k141_64816  | 5985  | 7  | 0 | 0  | Low-quality | 10    |
| Sample_T15C_k141_68529  | 7988  | 5  | 0 | 2  | Low-quality | 10    |
| Sample_C13A_k141_108524 | 7557  | 18 | 1 | 0  | Low-quality | 10    |
| Sample_C14B_k141_37982  | 9345  | 13 | 2 | 1  | Low-quality | 10    |
| Sample_C8C_k141_141863  | 6237  | 6  | 0 | 1  | Low-quality | 10    |
| Sample_C10A_k141_139185 | 5979  | 5  | 0 | 2  | Low-quality | 9.99  |
| Sample_T6C_k141_99583   | 6604  | 8  | 1 | 3  | Low-quality | 9.99  |

|                                   |       |    |    |    |             |      |
|-----------------------------------|-------|----|----|----|-------------|------|
| Sample_C11B_k141_129032           | 5468  | 6  | 0  | 1  | Low-quality | 9.99 |
| Sample_T11A_k141_38073_fragment_1 | 8975  | 12 | 2  | 0  | Low-quality | 9.99 |
| Sample_T12A_k141_118421           | 5503  | 8  | 1  | 0  | Low-quality | 9.99 |
| Sample_C10A_k141_38141            | 12265 | 13 | 0  | 5  | Low-quality | 9.98 |
| Sample_T10B_k141_153423           | 5660  | 7  | 0  | 1  | Low-quality | 9.98 |
| Sample_T14A_k141_101210           | 5347  | 7  | 0  | 0  | Low-quality | 9.98 |
| Sample_T3B_k141_77536             | 11428 | 14 | 3  | 0  | Low-quality | 9.98 |
| Sample_C6B_k141_189348            | 6615  | 8  | 1  | 0  | Low-quality | 9.98 |
| Sample_T5A_k141_16823             | 9890  | 10 | 2  | 0  | Low-quality | 9.98 |
| Sample_T8B_k141_21613             | 8389  | 16 | 3  | 1  | Low-quality | 9.98 |
| Sample_C7C_k141_40749             | 47622 | 50 | 2  | 13 | Low-quality | 9.97 |
| Sample_T8A_k141_13276             | 17398 | 12 | 0  | 11 | Low-quality | 9.97 |
| Sample_C6B_k141_203914            | 6030  | 8  | 7  | 0  | Low-quality | 9.97 |
| Sample_T5C_k141_181659            | 6404  | 8  | 0  | 1  | Low-quality | 9.97 |
| Sample_C10A_k141_84287            | 20303 | 17 | 0  | 9  | Low-quality | 9.96 |
| Sample_C10C_k141_71377            | 5961  | 4  | 0  | 1  | Low-quality | 9.96 |
| Sample_T17C_k141_29200            | 14505 | 9  | 0  | 9  | Low-quality | 9.96 |
| Sample_C10C_k141_143104           | 5713  | 9  | 7  | 0  | Low-quality | 9.96 |
| Sample_C7A_k141_108618            | 8250  | 12 | 2  | 0  | Low-quality | 9.96 |
| Sample_T8C_k141_16639             | 5687  | 11 | 10 | 0  | Low-quality | 9.96 |
| Sample_C12A_k141_54384            | 7959  | 9  | 0  | 2  | Low-quality | 9.95 |
| Sample_C1C_k141_161007            | 8131  | 7  | 0  | 2  | Low-quality | 9.95 |
| Sample_C2C_k141_157729            | 12396 | 14 | 1  | 6  | Low-quality | 9.95 |
| Sample_C6C_k141_44832             | 6574  | 7  | 1  | 0  | Low-quality | 9.95 |
| Sample_T1B_k141_1283              | 5473  | 6  | 0  | 1  | Low-quality | 9.95 |
| Sample_T8B_k141_96194             | 8128  | 8  | 0  | 4  | Low-quality | 9.95 |
| Sample_C7C_k141_158               | 5599  | 5  | 1  | 0  | Low-quality | 9.95 |
| Sample_C13A_k141_41684            | 6688  | 13 | 3  | 0  | Low-quality | 9.94 |
| Sample_C1C_k141_156234            | 16956 | 15 | 1  | 9  | Low-quality | 9.93 |
| Sample_C5A_k141_70987             | 18234 | 19 | 3  | 3  | Low-quality | 9.93 |
| Sample_C2C_k141_79370             | 5789  | 9  | 6  | 0  | Low-quality | 9.93 |
| Sample_C3C_k141_208173            | 6115  | 9  | 4  | 0  | Low-quality | 9.93 |
| Sample_C7B_k141_114043            | 8157  | 12 | 0  | 2  | Low-quality | 9.93 |
| Sample_C7B_k141_181030_fragment_3 | 7393  | 9  | 1  | 1  | Low-quality | 9.93 |
| Sample_T2C_k141_36905             | 7586  | 6  | 2  | 1  | Low-quality | 9.92 |
| Sample_C14A_k141_151024           | 8167  | 10 | 3  | 0  | Low-quality | 9.92 |
| Sample_T6A_k141_158819            | 6782  | 12 | 2  | 0  | Low-quality | 9.92 |
| Sample_T6A_k141_179110            | 5729  | 11 | 2  | 0  | Low-quality | 9.92 |
| Sample_C3A_k141_236319            | 5932  | 6  | 0  | 2  | Low-quality | 9.91 |

|                                   |       |    |   |    |             |      |
|-----------------------------------|-------|----|---|----|-------------|------|
| Sample_C12B_k141_153744           | 7456  | 7  | 4 | 2  | Low-quality | 9.91 |
| Sample_T11A_k141_76556            | 8826  | 9  | 1 | 0  | Low-quality | 9.91 |
| Sample_T4C_k141_39810             | 9302  | 6  | 0 | 1  | Low-quality | 9.91 |
| Sample_C2A_k141_59249             | 9615  | 19 | 5 | 0  | Low-quality | 9.9  |
| Sample_C10B_k141_143758           | 6271  | 9  | 0 | 3  | Low-quality | 9.89 |
| Sample_C6B_k141_30737             | 7054  | 8  | 0 | 1  | Low-quality | 9.89 |
| Sample_T14C_k141_78417            | 17666 | 18 | 1 | 8  | Low-quality | 9.89 |
| Sample_T6B_k141_6592              | 5411  | 8  | 0 | 0  | Low-quality | 9.89 |
| Sample_T6C_k141_256659            | 10601 | 10 | 0 | 5  | Low-quality | 9.89 |
| Sample_C10A_k141_8694             | 6086  | 9  | 8 | 0  | Low-quality | 9.89 |
| Sample_C11A_k141_57236            | 12910 | 13 | 6 | 0  | Low-quality | 9.89 |
| Sample_C11A_k141_62449            | 5337  | 6  | 1 | 1  | Low-quality | 9.89 |
| Sample_C2B_k141_330937            | 8598  | 8  | 0 | 1  | Low-quality | 9.89 |
| Sample_T10A_k141_2608             | 13219 | 22 | 0 | 1  | Low-quality | 9.89 |
| Sample_T7A_k141_53918             | 6249  | 12 | 0 | 0  | Low-quality | 9.89 |
| Sample_C1A_k141_118293            | 5402  | 8  | 0 | 2  | Low-quality | 9.88 |
| Sample_T2B_k141_90114             | 20153 | 22 | 1 | 4  | Low-quality | 9.88 |
| Sample_T14A_k141_237939           | 11129 | 15 | 2 | 0  | Low-quality | 9.88 |
| Sample_C14A_k141_27706            | 64098 | 57 | 2 | 27 | Low-quality | 9.87 |
| Sample_C7B_k141_165133            | 10664 | 8  | 0 | 4  | Low-quality | 9.87 |
| Sample_T12C_k141_119668           | 17426 | 10 | 4 | 0  | Low-quality | 9.87 |
| Sample_C9A_k141_68315             | 9501  | 7  | 0 | 4  | Low-quality | 9.86 |
| Sample_T18B_k141_1106             | 7527  | 10 | 1 | 7  | Low-quality | 9.86 |
| Sample_C3A_k141_27041             | 5965  | 8  | 3 | 0  | Low-quality | 9.86 |
| Sample_C5C_k141_56739             | 13839 | 16 | 2 | 1  | Low-quality | 9.86 |
| Sample_T13C_k141_2540             | 8120  | 5  | 3 | 0  | Low-quality | 9.86 |
| Sample_T4B_k141_85772             | 17436 | 19 | 0 | 2  | Low-quality | 9.86 |
| Sample_C3B_k141_226768            | 5157  | 6  | 1 | 0  | Low-quality | 9.85 |
| Sample_C7A_k141_127808            | 5452  | 3  | 3 | 0  | Low-quality | 9.85 |
| Sample_C13C_k141_34420            | 9703  | 4  | 0 | 0  | Low-quality | 9.85 |
| Sample_C2A_k141_123757            | 6108  | 6  | 0 | 0  | Low-quality | 9.85 |
| Sample_T2C_k141_2469              | 18148 | 23 | 1 | 3  | Low-quality | 9.84 |
| Sample_T6B_k141_106450            | 6506  | 12 | 1 | 2  | Low-quality | 9.84 |
| Sample_T6C_k141_181522            | 5945  | 7  | 5 | 0  | Low-quality | 9.84 |
| Sample_T17B_k141_10892            | 6843  | 9  | 1 | 2  | Low-quality | 9.83 |
| Sample_C12A_k141_22669_fragment_1 | 9728  | 17 | 2 | 0  | Low-quality | 9.83 |
| Sample_C5A_k141_20626             | 5192  | 11 | 4 | 0  | Low-quality | 9.83 |
| Sample_C11C_k141_68690            | 8408  | 7  | 0 | 2  | Low-quality | 9.82 |
| Sample_T8B_k141_249323            | 5270  | 4  | 0 | 0  | Low-quality | 9.82 |

|                                   |       |    |   |    |             |      |
|-----------------------------------|-------|----|---|----|-------------|------|
| Sample_T12C_k141_32140            | 8773  | 14 | 1 | 1  | Low-quality | 9.82 |
| Sample_T8A_k141_150662            | 5340  | 15 | 2 | 0  | Low-quality | 9.82 |
| Sample_C6C_k141_187241            | 5882  | 7  | 1 | 1  | Low-quality | 9.81 |
| Sample_T6C_k141_197839            | 15548 | 13 | 0 | 10 | Low-quality | 9.81 |
| Sample_C12C_k141_211545           | 7370  | 6  | 1 | 1  | Low-quality | 9.81 |
| Sample_T10B_k141_73214            | 5087  | 13 | 2 | 0  | Low-quality | 9.81 |
| Sample_C10B_k141_87260            | 5870  | 8  | 0 | 2  | Low-quality | 9.8  |
| Sample_C12A_k141_68614            | 10324 | 9  | 1 | 1  | Low-quality | 9.8  |
| Sample_C1C_k141_42059             | 9580  | 8  | 0 | 2  | Low-quality | 9.8  |
| Sample_C4B_k141_124923            | 5568  | 5  | 0 | 0  | Low-quality | 9.8  |
| Sample_T11B_k141_50029            | 6546  | 12 | 0 | 2  | Low-quality | 9.8  |
| Sample_T12A_k141_340670           | 14579 | 13 | 1 | 4  | Low-quality | 9.8  |
| Sample_T8B_k141_76625             | 5254  | 5  | 0 | 2  | Low-quality | 9.8  |
| Sample_T12C_k141_159188           | 7724  | 12 | 6 | 0  | Low-quality | 9.8  |
| Sample_T1B_k141_9669              | 5244  | 9  | 3 | 0  | Low-quality | 9.8  |
| Sample_C1B_k141_62840             | 6032  | 7  | 0 | 0  | Low-quality | 9.79 |
| Sample_C7A_k141_83727             | 5864  | 8  | 0 | 2  | Low-quality | 9.79 |
| Sample_T10A_k141_96625            | 7911  | 8  | 0 | 6  | Low-quality | 9.79 |
| Sample_T12B_k141_164981           | 5712  | 11 | 1 | 0  | Low-quality | 9.79 |
| Sample_T2C_k141_172591            | 7986  | 8  | 0 | 1  | Low-quality | 9.79 |
| Sample_T13A_k141_42944            | 5841  | 10 | 3 | 0  | Low-quality | 9.79 |
| Sample_T10A_k141_172908           | 5494  | 9  | 1 | 0  | Low-quality | 9.78 |
| Sample_T15C_k141_84533_fragment_2 | 8689  | 12 | 3 | 0  | Low-quality | 9.78 |
| Sample_T4C_k141_109405            | 5279  | 7  | 1 | 0  | Low-quality | 9.78 |
| Sample_C3A_k141_253064            | 16600 | 15 | 2 | 8  | Low-quality | 9.77 |
| Sample_T13B_k141_159968           | 6254  | 5  | 0 | 0  | Low-quality | 9.77 |
| Sample_T15B_k141_17934            | 6882  | 9  | 0 | 2  | Low-quality | 9.77 |
| Sample_T8A_k141_34842             | 6893  | 17 | 3 | 0  | Low-quality | 9.77 |
| Sample_T3B_k141_100538            | 15467 | 10 | 1 | 6  | Low-quality | 9.76 |
| Sample_T8A_k141_43688             | 6047  | 8  | 0 | 0  | Low-quality | 9.75 |
| Sample_C10C_k141_184092           | 17007 | 17 | 0 | 13 | Low-quality | 9.74 |
| Sample_C14C_k141_181012           | 9797  | 9  | 1 | 3  | Low-quality | 9.74 |
| Sample_T2B_k141_3039              | 6116  | 15 | 3 | 0  | Low-quality | 9.74 |
| Sample_C2C_k141_216874            | 10296 | 20 | 3 | 0  | Low-quality | 9.74 |
| Sample_T17B_k141_21326_fragment_1 | 8047  | 10 | 4 | 3  | Low-quality | 9.74 |
| Sample_T1C_k141_51054             | 6437  | 5  | 1 | 0  | Low-quality | 9.74 |
| Sample_C11A_k141_90914            | 12388 | 11 | 1 | 3  | Low-quality | 9.73 |
| Sample_C2B_k141_14286             | 5765  | 10 | 0 | 2  | Low-quality | 9.73 |
| Sample_C2B_k141_230958            | 17759 | 21 | 1 | 9  | Low-quality | 9.72 |

|                                    |        |     |   |     |             |      |
|------------------------------------|--------|-----|---|-----|-------------|------|
| Sample_C4A_k141_124140             | 12168  | 10  | 0 | 5   | Low-quality | 9.72 |
| Sample_T12A_k141_112165            | 6855   | 5   | 0 | 2   | Low-quality | 9.72 |
| Sample_T7A_k141_143918             | 11086  | 8   | 2 | 2   | Low-quality | 9.72 |
| Sample_C10C_k141_49848             | 5791   | 11  | 4 | 0   | Low-quality | 9.72 |
| Sample_T16C_k141_108639            | 5971   | 10  | 3 | 0   | Low-quality | 9.72 |
| Sample_T8B_k141_22202              | 7514   | 14  | 1 | 0   | Low-quality | 9.72 |
| Sample_C14C_k141_65900             | 14999  | 24  | 1 | 3   | Low-quality | 9.71 |
| Sample_C3A_k141_62183              | 10484  | 11  | 3 | 2   | Low-quality | 9.71 |
| Sample_C10A_k141_78431             | 6410   | 8   | 1 | 1   | Low-quality | 9.7  |
| Sample_C11C_k141_161144            | 6412   | 7   | 1 | 2   | Low-quality | 9.7  |
| Sample_C5A_k141_197996             | 7924   | 9   | 0 | 1   | Low-quality | 9.7  |
| Sample_T10B_k141_183359            | 6908   | 10  | 0 | 3   | Low-quality | 9.7  |
| Sample_T16C_k141_59823             | 6503   | 11  | 0 | 0   | Low-quality | 9.7  |
| Sample_T16C_k141_109155            | 7764   | 4   | 0 | 2   | Low-quality | 9.7  |
| Sample_C13A_k141_61176             | 6412   | 9   | 1 | 0   | Low-quality | 9.7  |
| Sample_C8C_k141_157115             | 5176   | 10  | 0 | 0   | Low-quality | 9.7  |
| Sample_T10B_k141_160054_fragment_1 | 7526   | 11  | 0 | 0   | Low-quality | 9.7  |
| Sample_T13B_k141_52098             | 8794   | 6   | 0 | 0   | Low-quality | 9.7  |
| Sample_T6C_k141_105509             | 5261   | 8   | 1 | 0   | Low-quality | 9.7  |
| Sample_T18A_k141_145365            | 17861  | 22  | 1 | 2   | Low-quality | 9.69 |
| Sample_C2B_k141_110923             | 10842  | 5   | 0 | 0   | Low-quality | 9.68 |
| Sample_C7B_k141_155517             | 5136   | 5   | 0 | 2   | Low-quality | 9.68 |
| Sample_T14A_k141_197479            | 5399   | 2   | 0 | 1   | Low-quality | 9.68 |
| Sample_T15C_k141_123515            | 7736   | 4   | 0 | 2   | Low-quality | 9.68 |
| Sample_T14B_k141_62566             | 5966   | 8   | 1 | 0   | Low-quality | 9.68 |
| Sample_T13B_k141_152288            | 9922   | 5   | 0 | 3   | Low-quality | 9.67 |
| Sample_T15C_k141_45291             | 6550   | 12  | 1 | 0   | Low-quality | 9.67 |
| Sample_T17C_k141_17338             | 306980 | 245 | 3 | 193 | Low-quality | 9.67 |
| Sample_T2A_k141_133634             | 7813   | 9   | 1 | 1   | Low-quality | 9.67 |
| Sample_T7B_k141_16913              | 5390   | 5   | 0 | 2   | Low-quality | 9.67 |
| Sample_C4A_k141_88257              | 14401  | 27  | 1 | 0   | Low-quality | 9.67 |
| Sample_C4B_k141_183425             | 5187   | 6   | 0 | 1   | Low-quality | 9.67 |
| Sample_T10A_k141_135151            | 8617   | 7   | 1 | 0   | Low-quality | 9.67 |
| Sample_C12B_k141_141640            | 15923  | 23  | 2 | 2   | Low-quality | 9.66 |
| Sample_C13A_k141_87100             | 23952  | 24  | 1 | 21  | Low-quality | 9.66 |
| Sample_T13A_k141_40731             | 5291   | 10  | 0 | 0   | Low-quality | 9.66 |
| Sample_C10A_k141_178754            | 5429   | 8   | 1 | 0   | Low-quality | 9.66 |
| Sample_C12A_k141_150476            | 5680   | 6   | 0 | 0   | Low-quality | 9.66 |
| Sample_C3C_k141_212365             | 5855   | 14  | 6 | 0   | Low-quality | 9.66 |

|                                   |       |    |   |    |             |      |
|-----------------------------------|-------|----|---|----|-------------|------|
| Sample_C4B_k141_220479            | 5749  | 6  | 0 | 2  | Low-quality | 9.65 |
| Sample_T7A_k141_57862             | 6181  | 8  | 0 | 0  | Low-quality | 9.65 |
| Sample_T10A_k141_80497            | 16011 | 21 | 5 | 0  | Low-quality | 9.65 |
| Sample_T12A_k141_336416           | 9224  | 9  | 0 | 1  | Low-quality | 9.65 |
| Sample_C2C_k141_25895             | 18489 | 26 | 2 | 14 | Low-quality | 9.64 |
| Sample_C5A_k141_219525            | 23407 | 34 | 1 | 5  | Low-quality | 9.64 |
| Sample_C11B_k141_210180           | 6269  | 18 | 3 | 0  | Low-quality | 9.64 |
| Sample_C14C_k141_57842            | 5130  | 6  | 0 | 1  | Low-quality | 9.64 |
| Sample_C8B_k141_9884              | 9191  | 11 | 1 | 0  | Low-quality | 9.64 |
| Sample_T15A_k141_68932            | 19683 | 21 | 1 | 2  | Low-quality | 9.64 |
| Sample_C7B_k141_103764            | 36305 | 30 | 0 | 23 | Low-quality | 9.63 |
| Sample_C10C_k141_83499            | 6445  | 11 | 2 | 0  | Low-quality | 9.63 |
| Sample_C10B_k141_138406           | 7702  | 9  | 2 | 0  | Low-quality | 9.62 |
| Sample_C2C_k141_95606             | 19039 | 12 | 1 | 2  | Low-quality | 9.62 |
| Sample_T10A_k141_140066           | 5362  | 1  | 0 | 1  | Low-quality | 9.62 |
| Sample_C9A_k141_86482             | 5146  | 7  | 1 | 0  | Low-quality | 9.61 |
| Sample_T12C_k141_52287            | 9297  | 7  | 0 | 2  | Low-quality | 9.61 |
| Sample_C13C_k141_30358            | 9559  | 12 | 3 | 0  | Low-quality | 9.61 |
| Sample_C8A_k141_65681             | 5298  | 14 | 1 | 0  | Low-quality | 9.61 |
| Sample_T10A_k141_103079           | 14024 | 18 | 4 | 0  | Low-quality | 9.61 |
| Sample_T2B_k141_104568            | 6037  | 11 | 2 | 1  | Low-quality | 9.61 |
| Sample_C4C_k141_257160            | 6112  | 5  | 1 | 1  | Low-quality | 9.59 |
| Sample_C8C_k141_36356             | 9111  | 4  | 0 | 2  | Low-quality | 9.59 |
| Sample_T7C_k141_120013            | 9109  | 10 | 0 | 4  | Low-quality | 9.59 |
| Sample_C7C_k141_1354              | 5922  | 12 | 0 | 0  | Low-quality | 9.59 |
| Sample_T17C_k141_30473            | 8414  | 9  | 3 | 0  | Low-quality | 9.59 |
| Sample_C4B_k141_240520            | 5737  | 8  | 0 | 4  | Low-quality | 9.58 |
| Sample_C8C_k141_133788            | 12745 | 36 | 1 | 0  | Low-quality | 9.58 |
| Sample_C9C_k141_79816             | 10375 | 8  | 0 | 2  | Low-quality | 9.58 |
| Sample_T4B_k141_361740            | 28077 | 40 | 2 | 8  | Low-quality | 9.58 |
| Sample_T7A_k141_70815             | 12898 | 15 | 1 | 0  | Low-quality | 9.58 |
| Sample_C2A_k141_230134            | 15113 | 27 | 3 | 1  | Low-quality | 9.58 |
| Sample_T10A_k141_32702            | 12810 | 22 | 1 | 1  | Low-quality | 9.58 |
| Sample_T14A_k141_201944           | 5814  | 16 | 1 | 0  | Low-quality | 9.58 |
| Sample_T14B_k141_7834             | 5282  | 7  | 1 | 1  | Low-quality | 9.58 |
| Sample_T16C_k141_21773_fragment_2 | 5717  | 13 | 5 | 0  | Low-quality | 9.58 |
| Sample_C6C_k141_92540             | 9182  | 9  | 0 | 8  | Low-quality | 9.57 |
| Sample_T4B_k141_144535            | 14444 | 16 | 0 | 6  | Low-quality | 9.57 |
| Sample_C9B_k141_98511             | 5796  | 15 | 1 | 0  | Low-quality | 9.57 |



|                         |       |    |   |   |             |      |
|-------------------------|-------|----|---|---|-------------|------|
| Sample_T3A_k141_106966  | 6711  | 10 | 4 | 1 | Low-quality | 9.57 |
| Sample_T6A_k141_92419   | 8608  | 4  | 0 | 1 | Low-quality | 9.56 |
| Sample_C5A_k141_158444  | 5793  | 9  | 2 | 0 | Low-quality | 9.56 |
| Sample_T14B_k141_98381  | 17616 | 20 | 1 | 7 | Low-quality | 9.55 |
| Sample_T16C_k141_8950   | 5583  | 6  | 0 | 0 | Low-quality | 9.55 |
| Sample_C12B_k141_166574 | 7881  | 6  | 0 | 3 | Low-quality | 9.54 |
| Sample_C8A_k141_38777   | 5713  | 9  | 0 | 1 | Low-quality | 9.54 |
| Sample_T13A_k141_103986 | 12738 | 37 | 0 | 0 | Low-quality | 9.54 |
| Sample_T17C_k141_5619   | 9365  | 3  | 0 | 0 | Low-quality | 9.54 |
| Sample_C4A_k141_12918   | 12389 | 15 | 1 | 1 | Low-quality | 9.54 |
| Sample_C14C_k141_121455 | 5671  | 11 | 2 | 1 | Low-quality | 9.53 |
| Sample_C6C_k141_189639  | 5862  | 4  | 1 | 0 | Low-quality | 9.53 |
| Sample_T15A_k141_114975 | 10329 | 10 | 0 | 4 | Low-quality | 9.53 |
| Sample_T3B_k141_76375   | 5706  | 8  | 0 | 0 | Low-quality | 9.53 |
| Sample_C12A_k141_199268 | 5605  | 5  | 1 | 0 | Low-quality | 9.53 |
| Sample_C4C_k141_40735   | 5142  | 6  | 3 | 0 | Low-quality | 9.53 |
| Sample_T5B_k141_41187   | 8125  | 10 | 2 | 1 | Low-quality | 9.53 |
| Sample_T11B_k141_95039  | 5659  | 5  | 1 | 1 | Low-quality | 9.52 |
| Sample_T7A_k141_137613  | 8572  | 7  | 0 | 1 | Low-quality | 9.52 |
| Sample_T12A_k141_254179 | 6356  | 14 | 0 | 0 | Low-quality | 9.52 |
| Sample_T13B_k141_129858 | 5770  | 13 | 1 | 0 | Low-quality | 9.52 |
| Sample_T6B_k141_106434  | 5545  | 9  | 1 | 1 | Low-quality | 9.52 |
| Sample_C10A_k141_207624 | 6860  | 4  | 2 | 0 | Low-quality | 9.51 |
| Sample_T2C_k141_232376  | 6144  | 15 | 3 | 0 | Low-quality | 9.51 |
| Sample_C8C_k141_9368    | 6331  | 5  | 0 | 2 | Low-quality | 9.5  |
| Sample_T17C_k141_28748  | 7673  | 11 | 1 | 7 | Low-quality | 9.5  |
| Sample_T8A_k141_132646  | 6227  | 7  | 0 | 1 | Low-quality | 9.5  |
| Sample_C8C_k141_77793   | 6399  | 10 | 3 | 0 | Low-quality | 9.5  |
| Sample_C11A_k141_86275  | 10002 | 11 | 1 | 4 | Low-quality | 9.49 |
| Sample_C5C_k141_22719   | 6079  | 11 | 1 | 4 | Low-quality | 9.49 |
| Sample_T12C_k141_159943 | 5042  | 7  | 0 | 1 | Low-quality | 9.49 |
| Sample_T12A_k141_22084  | 5277  | 4  | 0 | 0 | Low-quality | 9.49 |
| Sample_T12C_k141_129798 | 10239 | 10 | 0 | 2 | Low-quality | 9.48 |
| Sample_C1B_k141_32184   | 16516 | 26 | 3 | 0 | Low-quality | 9.48 |
| Sample_T10B_k141_53348  | 5964  | 8  | 3 | 0 | Low-quality | 9.48 |
| Sample_T14B_k141_129620 | 5554  | 7  | 1 | 0 | Low-quality | 9.48 |
| Sample_C13B_k141_1492   | 9451  | 4  | 0 | 3 | Low-quality | 9.47 |
| Sample_C7B_k141_101237  | 5584  | 7  | 0 | 1 | Low-quality | 9.47 |
| Sample_T3C_k141_4393    | 8264  | 8  | 0 | 6 | Low-quality | 9.47 |

|                         |       |    |   |    |             |      |
|-------------------------|-------|----|---|----|-------------|------|
| Sample_T7C_k141_156192  | 5888  | 3  | 1 | 0  | Low-quality | 9.47 |
| Sample_C2C_k141_140027  | 10010 | 22 | 3 | 0  | Low-quality | 9.47 |
| Sample_C6A_k141_178165  | 5329  | 6  | 2 | 0  | Low-quality | 9.47 |
| Sample_C10A_k141_28229  | 9314  | 6  | 0 | 6  | Low-quality | 9.46 |
| Sample_C8B_k141_75615   | 8689  | 11 | 0 | 3  | Low-quality | 9.46 |
| Sample_T17B_k141_30810  | 13596 | 14 | 0 | 2  | Low-quality | 9.46 |
| Sample_T18C_k141_26408  | 14996 | 14 | 1 | 9  | Low-quality | 9.46 |
| Sample_C1C_k141_123738  | 8508  | 9  | 0 | 1  | Low-quality | 9.45 |
| Sample_C8C_k141_142957  | 13595 | 17 | 1 | 4  | Low-quality | 9.45 |
| Sample_T10A_k141_12854  | 7364  | 10 | 0 | 3  | Low-quality | 9.45 |
| Sample_T14B_k141_128020 | 5656  | 10 | 0 | 0  | Low-quality | 9.45 |
| Sample_T2C_k141_114572  | 6569  | 5  | 0 | 1  | Low-quality | 9.45 |
| Sample_C2C_k141_94274   | 5720  | 6  | 2 | 0  | Low-quality | 9.45 |
| Sample_C9A_k141_56765   | 10677 | 11 | 4 | 2  | Low-quality | 9.45 |
| Sample_T8C_k141_48152   | 5658  | 12 | 0 | 0  | Low-quality | 9.45 |
| Sample_C10A_k141_259274 | 8067  | 2  | 1 | 0  | Low-quality | 9.44 |
| Sample_C8C_k141_22912   | 19366 | 21 | 0 | 3  | Low-quality | 9.44 |
| Sample_C12A_k141_1733   | 5716  | 13 | 4 | 0  | Low-quality | 9.44 |
| Sample_T6A_k141_38903   | 5045  | 8  | 7 | 1  | Low-quality | 9.44 |
| Sample_C12A_k141_87213  | 8490  | 9  | 0 | 1  | Low-quality | 9.43 |
| Sample_C2B_k141_1273    | 5480  | 5  | 0 | 0  | Low-quality | 9.43 |
| Sample_T4C_k141_32797   | 5155  | 7  | 0 | 1  | Low-quality | 9.43 |
| Sample_T5B_k141_8408    | 5647  | 5  | 0 | 0  | Low-quality | 9.43 |
| Sample_T14B_k141_108909 | 5151  | 5  | 4 | 0  | Low-quality | 9.43 |
| Sample_T16C_k141_14264  | 5672  | 10 | 2 | 0  | Low-quality | 9.43 |
| Sample_T2B_k141_203015  | 5893  | 9  | 2 | 0  | Low-quality | 9.43 |
| Sample_T4B_k141_106596  | 7274  | 16 | 2 | 1  | Low-quality | 9.43 |
| Sample_C8A_k141_111071  | 7588  | 8  | 0 | 1  | Low-quality | 9.42 |
| Sample_C9A_k141_57844   | 8129  | 8  | 0 | 0  | Low-quality | 9.42 |
| Sample_T17A_k141_13717  | 18095 | 12 | 0 | 12 | Low-quality | 9.42 |
| Sample_T12A_k141_233713 | 6045  | 6  | 0 | 0  | Low-quality | 9.42 |
| Sample_T12C_k141_169484 | 15025 | 30 | 4 | 2  | Low-quality | 9.42 |
| Sample_C3A_k141_186284  | 13268 | 34 | 1 | 0  | Low-quality | 9.41 |
| Sample_C6A_k141_200958  | 5931  | 5  | 0 | 1  | Low-quality | 9.41 |
| Sample_T10A_k141_113648 | 5630  | 10 | 0 | 1  | Low-quality | 9.4  |
| Sample_T10C_k141_20846  | 8150  | 7  | 0 | 2  | Low-quality | 9.4  |
| Sample_T16A_k141_84291  | 10058 | 9  | 0 | 2  | Low-quality | 9.4  |
| Sample_T18B_k141_72443  | 10443 | 7  | 0 | 2  | Low-quality | 9.4  |
| Sample_T4C_k141_13035   | 6210  | 5  | 1 | 0  | Low-quality | 9.4  |

|                                    |       |    |   |    |             |      |
|------------------------------------|-------|----|---|----|-------------|------|
| Sample_T5B_k141_42449              | 5625  | 7  | 0 | 2  | Low-quality | 9.4  |
| Sample_T13B_k141_139122            | 5099  | 6  | 1 | 0  | Low-quality | 9.4  |
| Sample_T5C_k141_154410             | 10540 | 20 | 2 | 1  | Low-quality | 9.4  |
| Sample_T6B_k141_140808             | 11716 | 12 | 1 | 0  | Low-quality | 9.4  |
| Sample_C4B_k141_220423             | 5989  | 9  | 0 | 3  | Low-quality | 9.39 |
| Sample_T12C_k141_126197            | 28629 | 22 | 2 | 5  | Low-quality | 9.39 |
| Sample_C2A_k141_66633              | 5109  | 6  | 0 | 0  | Low-quality | 9.39 |
| Sample_C8B_k141_158755             | 5581  | 12 | 2 | 0  | Low-quality | 9.39 |
| Sample_T7C_k141_30410              | 7564  | 5  | 2 | 0  | Low-quality | 9.39 |
| Sample_C12B_k141_184736            | 8232  | 7  | 0 | 0  | Low-quality | 9.38 |
| Sample_T14A_k141_78120             | 5658  | 10 | 0 | 2  | Low-quality | 9.38 |
| Sample_T1B_k141_11980              | 6901  | 4  | 0 | 2  | Low-quality | 9.38 |
| Sample_T13B_k141_47354             | 5713  | 11 | 1 | 1  | Low-quality | 9.38 |
| Sample_C3A_k141_133216             | 8283  | 7  | 0 | 3  | Low-quality | 9.37 |
| Sample_T11C_k141_149497            | 19159 | 20 | 0 | 13 | Low-quality | 9.37 |
| Sample_C13C_k141_78255_fragment_2  | 5689  | 10 | 1 | 1  | Low-quality | 9.37 |
| Sample_T10B_k141_64883             | 7341  | 6  | 0 | 1  | Low-quality | 9.37 |
| Sample_C14C_k141_178440            | 7653  | 6  | 0 | 4  | Low-quality | 9.36 |
| Sample_T14B_k141_176547            | 5443  | 8  | 0 | 1  | Low-quality | 9.36 |
| Sample_C5A_k141_198516             | 5917  | 14 | 2 | 0  | Low-quality | 9.36 |
| Sample_T10C_k141_72894_fragment_1  | 10723 | 17 | 4 | 2  | Low-quality | 9.36 |
| Sample_C10A_k141_8612              | 20845 | 33 | 3 | 8  | Low-quality | 9.35 |
| Sample_T7A_k141_211563             | 13190 | 12 | 2 | 0  | Low-quality | 9.35 |
| Sample_T5A_k141_29162              | 5018  | 5  | 1 | 0  | Low-quality | 9.35 |
| Sample_C12C_k141_108114            | 12830 | 13 | 0 | 4  | Low-quality | 9.34 |
| Sample_T17C_k141_24663             | 7635  | 6  | 0 | 2  | Low-quality | 9.34 |
| Sample_C11B_k141_155260_fragment_1 | 8336  | 8  | 0 | 4  | Low-quality | 9.34 |
| Sample_C14B_k141_67692             | 5826  | 9  | 1 | 0  | Low-quality | 9.34 |
| Sample_C2A_k141_313356             | 5212  | 6  | 0 | 1  | Low-quality | 9.34 |
| Sample_C7A_k141_147166             | 7689  | 12 | 4 | 1  | Low-quality | 9.34 |
| Sample_C4B_k141_222072             | 7483  | 16 | 1 | 1  | Low-quality | 9.33 |
| Sample_T16B_k141_163673            | 9307  | 7  | 0 | 6  | Low-quality | 9.33 |
| Sample_C11A_k141_16147             | 6049  | 8  | 1 | 0  | Low-quality | 9.33 |
| Sample_T17C_k141_13168             | 6599  | 5  | 0 | 4  | Low-quality | 9.32 |
| Sample_C8B_k141_21123              | 5916  | 12 | 2 | 0  | Low-quality | 9.32 |
| Sample_T10A_k141_116739            | 6657  | 9  | 2 | 0  | Low-quality | 9.32 |
| Sample_T8A_k141_174520             | 5603  | 12 | 2 | 0  | Low-quality | 9.32 |
| Sample_C8A_k141_139733             | 12913 | 13 | 1 | 2  | Low-quality | 9.3  |
| Sample_T10A_k141_31056             | 9948  | 11 | 0 | 2  | Low-quality | 9.3  |

|                                   |       |    |   |    |             |      |
|-----------------------------------|-------|----|---|----|-------------|------|
| Sample_C3A_k141_229302            | 6289  | 4  | 1 | 0  | Low-quality | 9.3  |
| Sample_T12C_k141_32835_fragment_1 | 10640 | 11 | 2 | 1  | Low-quality | 9.3  |
| Sample_C4B_k141_82478             | 50846 | 34 | 1 | 24 | Low-quality | 9.29 |
| Sample_C7B_k141_33638             | 7652  | 9  | 0 | 3  | Low-quality | 9.29 |
| Sample_T16A_k141_109462           | 20031 | 32 | 2 | 5  | Low-quality | 9.29 |
| Sample_T16B_k141_38140            | 5522  | 7  | 0 | 0  | Low-quality | 9.29 |
| Sample_T2B_k141_201242            | 6999  | 13 | 4 | 1  | Low-quality | 9.29 |
| Sample_T5A_k141_1889              | 7161  | 9  | 5 | 0  | Low-quality | 9.29 |
| Sample_C1B_k141_141930            | 5558  | 9  | 0 | 5  | Low-quality | 9.28 |
| Sample_C8B_k141_66753             | 5163  | 6  | 0 | 2  | Low-quality | 9.28 |
| Sample_T16A_k141_45909            | 8161  | 14 | 0 | 1  | Low-quality | 9.28 |
| Sample_T17B_k141_34351            | 9634  | 9  | 2 | 0  | Low-quality | 9.28 |
| Sample_T6B_k141_83034             | 9515  | 9  | 0 | 3  | Low-quality | 9.28 |
| Sample_T8A_k141_220100            | 5614  | 8  | 2 | 0  | Low-quality | 9.28 |
| Sample_T4B_k141_93682             | 5096  | 11 | 0 | 0  | Low-quality | 9.27 |
| Sample_T2B_k141_318815            | 5553  | 8  | 3 | 0  | Low-quality | 9.27 |
| Sample_C10C_k141_105023           | 6310  | 9  | 2 | 0  | Low-quality | 9.26 |
| Sample_T11C_k141_117233           | 11578 | 8  | 1 | 2  | Low-quality | 9.26 |
| Sample_T14A_k141_6210             | 5122  | 5  | 0 | 3  | Low-quality | 9.26 |
| Sample_C12A_k141_104002           | 24279 | 20 | 1 | 6  | Low-quality | 9.26 |
| Sample_C2C_k141_62612             | 6032  | 9  | 3 | 0  | Low-quality | 9.26 |
| Sample_T11C_k141_33389            | 6448  | 9  | 1 | 1  | Low-quality | 9.26 |
| Sample_T18A_k141_177303           | 6048  | 8  | 0 | 0  | Low-quality | 9.26 |
| Sample_T2C_k141_222653            | 5006  | 9  | 1 | 1  | Low-quality | 9.26 |
| Sample_T5B_k141_22436             | 8515  | 16 | 1 | 1  | Low-quality | 9.26 |
| Sample_C8B_k141_88130             | 9641  | 11 | 0 | 6  | Low-quality | 9.25 |
| Sample_T11B_k141_42642            | 7017  | 2  | 0 | 1  | Low-quality | 9.25 |
| Sample_T3C_k141_3148              | 7728  | 8  | 1 | 1  | Low-quality | 9.25 |
| Sample_T6A_k141_17199             | 15452 | 15 | 1 | 2  | Low-quality | 9.24 |
| Sample_C11B_k141_98534            | 8034  | 7  | 2 | 1  | Low-quality | 9.23 |
| Sample_T2A_k141_186155            | 16679 | 15 | 0 | 10 | Low-quality | 9.23 |
| Sample_T7B_k141_16596             | 9032  | 9  | 0 | 2  | Low-quality | 9.23 |
| Sample_T1A_k141_10655             | 13458 | 6  | 1 | 1  | Low-quality | 9.22 |
| Sample_C11C_k141_58593            | 7590  | 7  | 0 | 0  | Low-quality | 9.22 |
| Sample_C4A_k141_16980             | 7219  | 15 | 4 | 0  | Low-quality | 9.22 |
| Sample_C8B_k141_41361             | 6860  | 13 | 5 | 0  | Low-quality | 9.22 |
| Sample_C10B_k141_67463            | 13447 | 13 | 1 | 10 | Low-quality | 9.21 |
| Sample_C4B_k141_102546            | 50004 | 60 | 2 | 30 | Low-quality | 9.21 |
| Sample_C6A_k141_198303            | 9817  | 7  | 0 | 6  | Low-quality | 9.21 |

|                         |       |    |   |    |             |      |
|-------------------------|-------|----|---|----|-------------|------|
| Sample_C9A_k141_84059   | 6237  | 8  | 0 | 4  | Low-quality | 9.21 |
| Sample_C9C_k141_95629   | 7586  | 12 | 0 | 1  | Low-quality | 9.21 |
| Sample_T6A_k141_241203  | 8767  | 4  | 2 | 0  | Low-quality | 9.21 |
| Sample_T7A_k141_220630  | 8291  | 10 | 0 | 1  | Low-quality | 9.21 |
| Sample_T8B_k141_237348  | 15631 | 16 | 0 | 2  | Low-quality | 9.21 |
| Sample_C3A_k141_247366  | 8308  | 6  | 0 | 1  | Low-quality | 9.2  |
| Sample_C7B_k141_19454   | 9313  | 3  | 0 | 1  | Low-quality | 9.2  |
| Sample_C9B_k141_50583   | 16685 | 28 | 3 | 1  | Low-quality | 9.2  |
| Sample_T18A_k141_151180 | 6148  | 11 | 1 | 1  | Low-quality | 9.2  |
| Sample_T4B_k141_55625   | 7009  | 13 | 2 | 0  | Low-quality | 9.2  |
| Sample_C10A_k141_297254 | 7687  | 8  | 0 | 5  | Low-quality | 9.18 |
| Sample_C10C_k141_34911  | 5524  | 6  | 0 | 1  | Low-quality | 9.18 |
| Sample_C11B_k141_142777 | 5848  | 6  | 0 | 2  | Low-quality | 9.18 |
| Sample_C2A_k141_174478  | 5326  | 9  | 1 | 0  | Low-quality | 9.18 |
| Sample_T4B_k141_131072  | 33321 | 42 | 6 | 11 | Low-quality | 9.18 |
| Sample_T11A_k141_88657  | 7059  | 8  | 1 | 0  | Low-quality | 9.18 |
| Sample_C11A_k141_28273  | 5318  | 5  | 2 | 0  | Low-quality | 9.17 |
| Sample_C4A_k141_244717  | 5723  | 10 | 2 | 0  | Low-quality | 9.16 |
| Sample_C6B_k141_119904  | 6784  | 6  | 0 | 6  | Low-quality | 9.15 |
| Sample_C4B_k141_139337  | 14637 | 18 | 5 | 1  | Low-quality | 9.15 |
| Sample_T14B_k141_173812 | 12193 | 20 | 0 | 1  | Low-quality | 9.15 |
| Sample_T16B_k141_98373  | 6723  | 11 | 3 | 0  | Low-quality | 9.15 |
| Sample_T8C_k141_116765  | 10179 | 11 | 1 | 0  | Low-quality | 9.15 |
| Sample_T12B_k141_54771  | 97220 | 86 | 2 | 47 | Low-quality | 9.14 |
| Sample_C6B_k141_26453   | 18803 | 38 | 6 | 1  | Low-quality | 9.14 |
| Sample_T11C_k141_8518   | 7529  | 7  | 0 | 1  | Low-quality | 9.14 |
| Sample_T13B_k141_109379 | 5772  | 18 | 3 | 0  | Low-quality | 9.14 |
| Sample_C4A_k141_72713   | 5581  | 7  | 0 | 0  | Low-quality | 9.13 |
| Sample_C7B_k141_114249  | 18638 | 11 | 1 | 7  | Low-quality | 9.13 |
| Sample_T17B_k141_19491  | 9473  | 8  | 4 | 0  | Low-quality | 9.13 |
| Sample_C4C_k141_193780  | 5928  | 6  | 0 | 3  | Low-quality | 9.12 |
| Sample_T1A_k141_623     | 9047  | 5  | 0 | 1  | Low-quality | 9.12 |
| Sample_C11A_k141_38034  | 9354  | 9  | 1 | 2  | Low-quality | 9.12 |
| Sample_C2B_k141_107879  | 7761  | 9  | 0 | 2  | Low-quality | 9.12 |
| Sample_C9B_k141_76851   | 5942  | 7  | 0 | 1  | Low-quality | 9.11 |
| Sample_T16A_k141_14541  | 18821 | 19 | 0 | 11 | Low-quality | 9.11 |
| Sample_T4B_k141_50730   | 7826  | 10 | 0 | 1  | Low-quality | 9.11 |
| Sample_T8B_k141_56708   | 35238 | 38 | 1 | 5  | Low-quality | 9.11 |
| Sample_C14C_k141_94780  | 5545  | 18 | 0 | 0  | Low-quality | 9.11 |

|                                   |       |    |   |    |             |      |
|-----------------------------------|-------|----|---|----|-------------|------|
| Sample_T2A_k141_260030            | 15895 | 15 | 0 | 10 | Low-quality | 9.1  |
| Sample_T6A_k141_280856            | 5019  | 4  | 0 | 1  | Low-quality | 9.1  |
| Sample_T6C_k141_60027             | 17098 | 12 | 0 | 12 | Low-quality | 9.1  |
| Sample_C13B_k141_85088            | 6084  | 11 | 1 | 0  | Low-quality | 9.1  |
| Sample_T6C_k141_235133            | 5078  | 7  | 0 | 0  | Low-quality | 9.1  |
| Sample_C10B_k141_149988           | 9132  | 8  | 0 | 5  | Low-quality | 9.09 |
| Sample_C12C_k141_51675            | 5806  | 3  | 0 | 0  | Low-quality | 9.09 |
| Sample_T6C_k141_1671              | 27920 | 31 | 1 | 3  | Low-quality | 9.09 |
| Sample_C2A_k141_218216            | 5456  | 12 | 1 | 0  | Low-quality | 9.09 |
| Sample_C3A_k141_15128             | 5555  | 14 | 0 | 0  | Low-quality | 9.09 |
| Sample_C3C_k141_228095            | 5254  | 14 | 1 | 1  | Low-quality | 9.09 |
| Sample_C8C_k141_110960            | 7699  | 4  | 0 | 1  | Low-quality | 9.09 |
| Sample_T5C_k141_110416            | 10769 | 8  | 4 | 0  | Low-quality | 9.09 |
| Sample_C7B_k141_171950            | 9412  | 10 | 3 | 2  | Low-quality | 9.08 |
| Sample_C9B_k141_102913            | 18246 | 20 | 0 | 4  | Low-quality | 9.08 |
| Sample_T8A_k141_164650            | 7455  | 10 | 3 | 3  | Low-quality | 9.08 |
| Sample_T16B_k141_930              | 14266 | 19 | 1 | 1  | Low-quality | 9.07 |
| Sample_T18A_k141_88043            | 12587 | 10 | 1 | 2  | Low-quality | 9.07 |
| Sample_T4B_k141_343411            | 13077 | 15 | 1 | 4  | Low-quality | 9.07 |
| Sample_T2B_k141_80828             | 8355  | 3  | 0 | 1  | Low-quality | 9.06 |
| Sample_T3C_k141_118002            | 9227  | 13 | 0 | 0  | Low-quality | 9.06 |
| Sample_T8B_k141_30098             | 17865 | 21 | 1 | 8  | Low-quality | 9.06 |
| Sample_T3B_k141_115654            | 5806  | 6  | 1 | 0  | Low-quality | 9.06 |
| Sample_T6A_k141_265735_fragment_1 | 6243  | 8  | 2 | 0  | Low-quality | 9.06 |
| Sample_T13C_k141_105270           | 5758  | 8  | 0 | 3  | Low-quality | 9.05 |
| Sample_C2B_k141_279337            | 5980  | 5  | 1 | 0  | Low-quality | 9.05 |
| Sample_T5C_k141_26007_fragment_1  | 10801 | 14 | 5 | 1  | Low-quality | 9.05 |
| Sample_T12B_k141_165820           | 12545 | 11 | 2 | 0  | Low-quality | 9.04 |
| Sample_C3C_k141_119836            | 5770  | 11 | 1 | 0  | Low-quality | 9.04 |
| Sample_C3C_k141_32764             | 5680  | 6  | 6 | 0  | Low-quality | 9.04 |
| Sample_T10B_k141_14767            | 6928  | 11 | 3 | 0  | Low-quality | 9.04 |
| Sample_T17B_k141_28276            | 8258  | 3  | 0 | 0  | Low-quality | 9.03 |
| Sample_C3B_k141_271114_fragment_1 | 7621  | 8  | 1 | 1  | Low-quality | 9.03 |
| Sample_C9C_k141_101034            | 5901  | 9  | 2 | 0  | Low-quality | 9.03 |
| Sample_T12B_k141_64780            | 5184  | 6  | 0 | 0  | Low-quality | 9.03 |
| Sample_C2C_k141_46792             | 9174  | 8  | 0 | 7  | Low-quality | 9.02 |
| Sample_C5A_k141_283409            | 13058 | 9  | 1 | 0  | Low-quality | 9.02 |
| Sample_C8B_k141_7161              | 5242  | 8  | 0 | 0  | Low-quality | 9.02 |
| Sample_T15B_k141_102745           | 17813 | 22 | 0 | 7  | Low-quality | 9.02 |

|                                  |       |    |   |    |             |      |
|----------------------------------|-------|----|---|----|-------------|------|
| Sample_T10A_k141_88644           | 5901  | 11 | 2 | 0  | Low-quality | 9.02 |
| Sample_T11C_k141_13539           | 5832  | 6  | 1 | 1  | Low-quality | 9.02 |
| Sample_T12C_k141_179177          | 6938  | 14 | 0 | 1  | Low-quality | 9.02 |
| Sample_T17B_k141_2590            | 9437  | 8  | 0 | 0  | Low-quality | 9.02 |
| Sample_T3B_k141_63133            | 5958  | 4  | 1 | 0  | Low-quality | 9.02 |
| Sample_C14C_k141_64992           | 16202 | 15 | 1 | 10 | Low-quality | 9.01 |
| Sample_T12C_k141_146600          | 7138  | 13 | 0 | 0  | Low-quality | 9.01 |
| Sample_C10A_k141_306813          | 5721  | 3  | 1 | 0  | Low-quality | 9    |
| Sample_C3B_k141_1366             | 10400 | 5  | 1 | 0  | Low-quality | 9    |
| Sample_T12C_k141_92676           | 6356  | 5  | 0 | 0  | Low-quality | 9    |
| Sample_C4B_k141_123916           | 5759  | 6  | 0 | 1  | Low-quality | 9    |
| Sample_C10A_k141_205288          | 7050  | 15 | 1 | 2  | Low-quality | 8.99 |
| Sample_T8B_k141_110361           | 5383  | 5  | 0 | 1  | Low-quality | 8.99 |
| Sample_T12B_k141_140111          | 14515 | 31 | 2 | 0  | Low-quality | 8.99 |
| Sample_T13C_k141_5600            | 9241  | 4  | 0 | 0  | Low-quality | 8.99 |
| Sample_C2C_k141_262169           | 5451  | 11 | 3 | 0  | Low-quality | 8.98 |
| Sample_T15B_k141_19233           | 11253 | 26 | 5 | 0  | Low-quality | 8.98 |
| Sample_C9C_k141_101018           | 5926  | 3  | 1 | 0  | Low-quality | 8.97 |
| Sample_T6B_k141_23494            | 5368  | 10 | 0 | 0  | Low-quality | 8.97 |
| Sample_T16C_k141_26082           | 5175  | 7  | 1 | 0  | Low-quality | 8.97 |
| Sample_C12C_k141_133691          | 5919  | 4  | 0 | 1  | Low-quality | 8.96 |
| Sample_T18C_k141_34503           | 17920 | 15 | 0 | 6  | Low-quality | 8.96 |
| Sample_C1A_k141_152927           | 5598  | 11 | 3 | 0  | Low-quality | 8.96 |
| Sample_T3B_k141_141450           | 5288  | 6  | 2 | 0  | Low-quality | 8.96 |
| Sample_C10B_k141_84859           | 5360  | 9  | 0 | 2  | Low-quality | 8.95 |
| Sample_C4B_k141_106332           | 16507 | 14 | 1 | 5  | Low-quality | 8.95 |
| Sample_C7B_k141_29420            | 6558  | 2  | 0 | 0  | Low-quality | 8.95 |
| Sample_T1B_k141_35823            | 15630 | 10 | 0 | 6  | Low-quality | 8.95 |
| Sample_T6B_k141_34210            | 5357  | 4  | 0 | 0  | Low-quality | 8.95 |
| Sample_C10A_k141_108036          | 5741  | 5  | 2 | 0  | Low-quality | 8.95 |
| Sample_T12C_k141_40244           | 6862  | 13 | 2 | 0  | Low-quality | 8.95 |
| Sample_T4B_k141_241145           | 5382  | 4  | 3 | 0  | Low-quality | 8.95 |
| Sample_T7B_k141_28598_fragment_1 | 7779  | 13 | 1 | 0  | Low-quality | 8.95 |
| Sample_T15C_k141_138217          | 7542  | 12 | 1 | 1  | Low-quality | 8.94 |
| Sample_T6A_k141_281865           | 14173 | 17 | 1 | 9  | Low-quality | 8.94 |
| Sample_T8B_k141_14163            | 7358  | 7  | 0 | 1  | Low-quality | 8.94 |
| Sample_C3A_k141_158466           | 5454  | 7  | 4 | 0  | Low-quality | 8.94 |
| Sample_T11A_k141_64904           | 6234  | 12 | 9 | 1  | Low-quality | 8.94 |
| Sample_T2B_k141_202627           | 5739  | 7  | 0 | 1  | Low-quality | 8.94 |

|                                    |       |    |   |    |             |      |
|------------------------------------|-------|----|---|----|-------------|------|
| Sample_T6B_k141_46306              | 10216 | 12 | 2 | 1  | Low-quality | 8.94 |
| Sample_C10A_k141_292779            | 5728  | 8  | 3 | 0  | Low-quality | 8.93 |
| Sample_C5C_k141_2815               | 13804 | 16 | 1 | 1  | Low-quality | 8.93 |
| Sample_C9C_k141_16077              | 6092  | 11 | 7 | 0  | Low-quality | 8.93 |
| Sample_T11C_k141_120014_fragment_1 | 9851  | 8  | 0 | 2  | Low-quality | 8.93 |
| Sample_C6C_k141_238149             | 8136  | 12 | 2 | 3  | Low-quality | 8.92 |
| Sample_T15A_k141_11300             | 17970 | 18 | 0 | 10 | Low-quality | 8.92 |
| Sample_C13C_k141_28268             | 6673  | 11 | 2 | 0  | Low-quality | 8.92 |
| Sample_C1B_k141_222937             | 5617  | 8  | 2 | 2  | Low-quality | 8.92 |
| Sample_C13A_k141_32918             | 8018  | 8  | 0 | 0  | Low-quality | 8.91 |
| Sample_C3C_k141_196058             | 16929 | 13 | 2 | 3  | Low-quality | 8.91 |
| Sample_T7C_k141_33935              | 5338  | 5  | 3 | 0  | Low-quality | 8.91 |
| Sample_C7A_k141_111951             | 7287  | 13 | 0 | 0  | Low-quality | 8.9  |
| Sample_C8A_k141_8913               | 19254 | 19 | 1 | 6  | Low-quality | 8.9  |
| Sample_T13C_k141_67262             | 5853  | 6  | 1 | 0  | Low-quality | 8.9  |
| Sample_T4B_k141_4856               | 7807  | 7  | 0 | 1  | Low-quality | 8.9  |
| Sample_C2A_k141_308344             | 14907 | 15 | 0 | 5  | Low-quality | 8.89 |
| Sample_C6B_k141_129356             | 30186 | 30 | 1 | 12 | Low-quality | 8.89 |
| Sample_T16B_k141_172706            | 7377  | 8  | 1 | 2  | Low-quality | 8.89 |
| Sample_T17B_k141_13475             | 18811 | 14 | 0 | 14 | Low-quality | 8.89 |
| Sample_T18A_k141_109428            | 10161 | 11 | 0 | 7  | Low-quality | 8.89 |
| Sample_C7C_k141_77498              | 11237 | 12 | 3 | 0  | Low-quality | 8.88 |
| Sample_C8B_k141_181588             | 5210  | 2  | 0 | 1  | Low-quality | 8.88 |
| Sample_T10C_k141_20315             | 8907  | 9  | 0 | 6  | Low-quality | 8.88 |
| Sample_T14A_k141_121286            | 10071 | 10 | 1 | 2  | Low-quality | 8.88 |
| Sample_T6C_k141_177372             | 7572  | 6  | 0 | 0  | Low-quality | 8.88 |
| Sample_C10B_k141_51946             | 7322  | 6  | 0 | 2  | Low-quality | 8.88 |
| Sample_T3A_k141_86369              | 7307  | 5  | 2 | 0  | Low-quality | 8.88 |
| Sample_T7A_k141_133681             | 5503  | 4  | 3 | 0  | Low-quality | 8.88 |
| Sample_T8B_k141_174190             | 14284 | 20 | 4 | 1  | Low-quality | 8.88 |
| Sample_T13C_k141_33885             | 8000  | 17 | 2 | 2  | Low-quality | 8.87 |
| Sample_T7C_k141_75199              | 5368  | 10 | 1 | 0  | Low-quality | 8.87 |
| Sample_T8B_k141_75868              | 6799  | 7  | 1 | 0  | Low-quality | 8.87 |
| Sample_C10A_k141_299120            | 6107  | 10 | 0 | 0  | Low-quality | 8.87 |
| Sample_C11B_k141_216022            | 7078  | 16 | 1 | 0  | Low-quality | 8.87 |
| Sample_T14A_k141_120740            | 6175  | 13 | 1 | 0  | Low-quality | 8.87 |
| Sample_C4B_k141_216126             | 5279  | 4  | 1 | 0  | Low-quality | 8.86 |
| Sample_C7C_k141_12300              | 5037  | 5  | 0 | 0  | Low-quality | 8.86 |
| Sample_T3A_k141_66783              | 5910  | 6  | 3 | 1  | Low-quality | 8.86 |



|                         |       |    |   |    |             |      |
|-------------------------|-------|----|---|----|-------------|------|
| Sample_C10A_k141_23319  | 7972  | 10 | 1 | 0  | Low-quality | 8.86 |
| Sample_C5A_k141_149957  | 10971 | 10 | 0 | 3  | Low-quality | 8.85 |
| Sample_T14C_k141_112575 | 5736  | 5  | 0 | 0  | Low-quality | 8.85 |
| Sample_T18C_k141_115834 | 15443 | 16 | 0 | 15 | Low-quality | 8.85 |
| Sample_T8B_k141_117205  | 14131 | 11 | 1 | 1  | Low-quality | 8.85 |
| Sample_T8A_k141_105945  | 5051  | 9  | 1 | 0  | Low-quality | 8.85 |
| Sample_T3C_k141_6315    | 5081  | 7  | 2 | 1  | Low-quality | 8.84 |
| Sample_C3A_k141_209113  | 9009  | 4  | 3 | 1  | Low-quality | 8.84 |
| Sample_C3B_k141_177050  | 5079  | 14 | 1 | 0  | Low-quality | 8.84 |
| Sample_C5B_k141_74362   | 6345  | 9  | 1 | 1  | Low-quality | 8.83 |
| Sample_C6B_k141_27350   | 5808  | 8  | 0 | 3  | Low-quality | 8.82 |
| Sample_T14A_k141_226120 | 31008 | 18 | 1 | 10 | Low-quality | 8.82 |
| Sample_C1C_k141_64860   | 5014  | 11 | 1 | 0  | Low-quality | 8.82 |
| Sample_T10A_k141_139950 | 5169  | 8  | 1 | 1  | Low-quality | 8.82 |
| Sample_T1C_k141_16562   | 10874 | 10 | 0 | 7  | Low-quality | 8.81 |
| Sample_T3B_k141_75144   | 8022  | 9  | 0 | 1  | Low-quality | 8.81 |
| Sample_C7C_k141_104824  | 15538 | 29 | 1 | 0  | Low-quality | 8.81 |
| Sample_T13B_k141_133814 | 12878 | 17 | 1 | 2  | Low-quality | 8.81 |
| Sample_C10A_k141_7832   | 8196  | 12 | 2 | 3  | Low-quality | 8.8  |
| Sample_T10A_k141_108223 | 6560  | 9  | 3 | 0  | Low-quality | 8.8  |
| Sample_T15A_k141_87145  | 8140  | 4  | 0 | 2  | Low-quality | 8.79 |
| Sample_C11A_k141_20707  | 15204 | 29 | 2 | 0  | Low-quality | 8.79 |
| Sample_C11A_k141_171521 | 18580 | 14 | 0 | 14 | Low-quality | 8.78 |
| Sample_C11A_k141_4510   | 7521  | 7  | 0 | 3  | Low-quality | 8.78 |
| Sample_T13A_k141_16093  | 6422  | 8  | 1 | 1  | Low-quality | 8.78 |
| Sample_T12A_k141_292868 | 6584  | 6  | 0 | 1  | Low-quality | 8.78 |
| Sample_T15B_k141_48567  | 5215  | 9  | 2 | 1  | Low-quality | 8.78 |
| Sample_T2A_k141_83045   | 5233  | 6  | 0 | 0  | Low-quality | 8.78 |
| Sample_C4A_k141_23964   | 14002 | 11 | 1 | 4  | Low-quality | 8.77 |
| Sample_T17A_k141_13855  | 24664 | 34 | 2 | 8  | Low-quality | 8.77 |
| Sample_T6C_k141_174440  | 16929 | 17 | 0 | 14 | Low-quality | 8.77 |
| Sample_T10C_k141_88437  | 11623 | 17 | 1 | 1  | Low-quality | 8.77 |
| Sample_T13B_k141_154195 | 16800 | 18 | 0 | 11 | Low-quality | 8.76 |
| Sample_T13B_k141_160143 | 8137  | 8  | 0 | 0  | Low-quality | 8.76 |
| Sample_T8C_k141_152216  | 5232  | 6  | 0 | 0  | Low-quality | 8.76 |
| Sample_C1A_k141_164238  | 10215 | 13 | 0 | 1  | Low-quality | 8.75 |
| Sample_C8B_k141_12953   | 14191 | 16 | 1 | 1  | Low-quality | 8.75 |
| Sample_T10A_k141_168288 | 5835  | 5  | 0 | 2  | Low-quality | 8.75 |
| Sample_T13B_k141_150466 | 17054 | 14 | 0 | 10 | Low-quality | 8.75 |

|                         |       |    |   |    |             |      |
|-------------------------|-------|----|---|----|-------------|------|
| Sample_T13C_k141_130072 | 7199  | 9  | 1 | 1  | Low-quality | 8.75 |
| Sample_C11A_k141_56783  | 7151  | 5  | 1 | 1  | Low-quality | 8.75 |
| Sample_C11A_k141_93982  | 6943  | 6  | 1 | 1  | Low-quality | 8.75 |
| Sample_T14A_k141_149749 | 5778  | 4  | 1 | 0  | Low-quality | 8.74 |
| Sample_T14B_k141_194170 | 6422  | 5  | 0 | 1  | Low-quality | 8.74 |
| Sample_T16B_k141_53597  | 7841  | 10 | 0 | 1  | Low-quality | 8.74 |
| Sample_T8A_k141_118392  | 17737 | 16 | 0 | 15 | Low-quality | 8.74 |
| Sample_C10A_k141_121551 | 13349 | 18 | 4 | 1  | Low-quality | 8.74 |
| Sample_T8B_k141_198717  | 6745  | 12 | 2 | 0  | Low-quality | 8.74 |
| Sample_C12A_k141_11787  | 7135  | 6  | 0 | 1  | Low-quality | 8.73 |
| Sample_T13C_k141_10602  | 5624  | 5  | 3 | 0  | Low-quality | 8.73 |
| Sample_T7B_k141_89106   | 10759 | 7  | 4 | 0  | Low-quality | 8.73 |
| Sample_C13A_k141_43371  | 8966  | 14 | 0 | 1  | Low-quality | 8.72 |
| Sample_C6B_k141_51858   | 6323  | 6  | 0 | 1  | Low-quality | 8.72 |
| Sample_T16C_k141_30626  | 13148 | 12 | 0 | 6  | Low-quality | 8.72 |
| Sample_T18B_k141_60669  | 6267  | 4  | 0 | 1  | Low-quality | 8.72 |
| Sample_T2A_k141_93902   | 5664  | 8  | 0 | 5  | Low-quality | 8.72 |
| Sample_C8B_k141_200563  | 8307  | 16 | 0 | 0  | Low-quality | 8.71 |
| Sample_T8C_k141_58353   | 5662  | 8  | 5 | 0  | Low-quality | 8.71 |
| Sample_C10A_k141_201710 | 5316  | 5  | 0 | 2  | Low-quality | 8.7  |
| Sample_T15C_k141_34145  | 5211  | 7  | 0 | 3  | Low-quality | 8.7  |
| Sample_T15C_k141_145847 | 5927  | 6  | 0 | 1  | Low-quality | 8.7  |
| Sample_T8C_k141_34331   | 6082  | 7  | 0 | 0  | Low-quality | 8.7  |
| Sample_C5B_k141_57904   | 6356  | 8  | 2 | 0  | Low-quality | 8.7  |
| Sample_T15A_k141_181038 | 7577  | 9  | 5 | 0  | Low-quality | 8.7  |
| Sample_T3B_k141_125199  | 6585  | 13 | 4 | 0  | Low-quality | 8.7  |
| Sample_T3B_k141_32922   | 7806  | 8  | 0 | 0  | Low-quality | 8.7  |
| Sample_T5C_k141_185756  | 17495 | 15 | 0 | 10 | Low-quality | 8.69 |
| Sample_T6C_k141_237040  | 5202  | 9  | 0 | 0  | Low-quality | 8.69 |
| Sample_C3B_k141_138127  | 7820  | 7  | 5 | 0  | Low-quality | 8.69 |
| Sample_T5C_k141_176355  | 5285  | 11 | 0 | 0  | Low-quality | 8.69 |
| Sample_T11B_k141_44898  | 8232  | 7  | 0 | 1  | Low-quality | 8.68 |
| Sample_T1A_k141_43605   | 5547  | 6  | 0 | 3  | Low-quality | 8.68 |
| Sample_C10A_k141_331464 | 8033  | 11 | 5 | 0  | Low-quality | 8.68 |
| Sample_C9A_k141_9136    | 16787 | 41 | 1 | 0  | Low-quality | 8.68 |
| Sample_T18B_k141_96264  | 5301  | 5  | 4 | 0  | Low-quality | 8.68 |
| Sample_T6C_k141_50760   | 7806  | 6  | 0 | 2  | Low-quality | 8.67 |
| Sample_C12A_k141_146695 | 5489  | 6  | 1 | 0  | Low-quality | 8.66 |
| Sample_T4B_k141_373638  | 5034  | 6  | 0 | 0  | Low-quality | 8.66 |

|                         |       |    |   |    |             |      |
|-------------------------|-------|----|---|----|-------------|------|
| Sample_T6A_k141_255933  | 5911  | 9  | 0 | 0  | Low-quality | 8.66 |
| Sample_C12C_k141_19865  | 7630  | 10 | 0 | 1  | Low-quality | 8.66 |
| Sample_C7C_k141_85872   | 15218 | 32 | 8 | 1  | Low-quality | 8.66 |
| Sample_C9A_k141_93442   | 18675 | 40 | 5 | 1  | Low-quality | 8.66 |
| Sample_T3B_k141_179430  | 7505  | 6  | 0 | 2  | Low-quality | 8.66 |
| Sample_C7A_k141_10395   | 6986  | 11 | 1 | 4  | Low-quality | 8.65 |
| Sample_T2C_k141_23562   | 5184  | 5  | 0 | 1  | Low-quality | 8.65 |
| Sample_T4B_k141_173859  | 7894  | 11 | 0 | 2  | Low-quality | 8.65 |
| Sample_C8B_k141_39790   | 5716  | 4  | 1 | 0  | Low-quality | 8.65 |
| Sample_T2B_k141_154751  | 7118  | 7  | 2 | 0  | Low-quality | 8.65 |
| Sample_C13B_k141_85765  | 17098 | 15 | 2 | 2  | Low-quality | 8.64 |
| Sample_C10A_k141_166757 | 5590  | 8  | 0 | 0  | Low-quality | 8.64 |
| Sample_C14C_k141_72702  | 5240  | 9  | 0 | 0  | Low-quality | 8.64 |
| Sample_C9A_k141_94829   | 8870  | 6  | 0 | 3  | Low-quality | 8.64 |
| Sample_C6B_k141_35619   | 17280 | 17 | 0 | 12 | Low-quality | 8.63 |
| Sample_T16B_k141_96697  | 6379  | 6  | 3 | 1  | Low-quality | 8.63 |
| Sample_T18C_k141_7235   | 9324  | 11 | 0 | 3  | Low-quality | 8.63 |
| Sample_C8A_k141_172273  | 6376  | 6  | 0 | 1  | Low-quality | 8.63 |
| Sample_T3C_k141_21324   | 8893  | 10 | 0 | 1  | Low-quality | 8.63 |
| Sample_T13C_k141_89493  | 15901 | 23 | 1 | 3  | Low-quality | 8.62 |
| Sample_T7A_k141_209631  | 5386  | 5  | 0 | 2  | Low-quality | 8.62 |
| Sample_C4B_k141_245582  | 7098  | 5  | 3 | 0  | Low-quality | 8.62 |
| Sample_T4C_k141_117375  | 17208 | 17 | 0 | 5  | Low-quality | 8.61 |
| Sample_C2A_k141_2031    | 12377 | 18 | 3 | 2  | Low-quality | 8.61 |
| Sample_T4A_k141_101352  | 8746  | 13 | 0 | 2  | Low-quality | 8.6  |
| Sample_C4C_k141_122204  | 7110  | 4  | 0 | 2  | Low-quality | 8.59 |
| Sample_C7B_k141_178128  | 6575  | 2  | 0 | 0  | Low-quality | 8.59 |
| Sample_T15B_k141_95308  | 13279 | 18 | 1 | 4  | Low-quality | 8.59 |
| Sample_T3A_k141_131847  | 7017  | 6  | 0 | 0  | Low-quality | 8.59 |
| Sample_T17B_k141_12512  | 5338  | 9  | 5 | 2  | Low-quality | 8.59 |
| Sample_T4C_k141_70551   | 5130  | 14 | 2 | 0  | Low-quality | 8.58 |
| Sample_C10C_k141_39768  | 5847  | 6  | 0 | 1  | Low-quality | 8.57 |
| Sample_C2C_k141_28891   | 7684  | 8  | 0 | 7  | Low-quality | 8.57 |
| Sample_C3B_k141_61217   | 10707 | 16 | 2 | 3  | Low-quality | 8.57 |
| Sample_C6C_k141_235023  | 8212  | 7  | 0 | 0  | Low-quality | 8.57 |
| Sample_C4A_k141_162070  | 12417 | 18 | 3 | 0  | Low-quality | 8.57 |
| Sample_T10A_k141_93682  | 6925  | 12 | 4 | 1  | Low-quality | 8.57 |
| Sample_T16A_k141_71724  | 5174  | 8  | 4 | 0  | Low-quality | 8.57 |
| Sample_T2B_k141_131348  | 27152 | 25 | 0 | 17 | Low-quality | 8.56 |

|                                   |       |    |   |    |             |      |
|-----------------------------------|-------|----|---|----|-------------|------|
| Sample_T2C_k141_118712            | 14107 | 21 | 2 | 1  | Low-quality | 8.56 |
| Sample_T6A_k141_226212            | 10558 | 11 | 0 | 6  | Low-quality | 8.56 |
| Sample_C2C_k141_52457             | 5277  | 6  | 0 | 1  | Low-quality | 8.56 |
| Sample_C4C_k141_7104              | 5164  | 8  | 0 | 0  | Low-quality | 8.56 |
| Sample_C9C_k141_98817             | 6543  | 16 | 3 | 0  | Low-quality | 8.56 |
| Sample_T14B_k141_4021             | 10325 | 10 | 0 | 0  | Low-quality | 8.56 |
| Sample_T16B_k141_71420            | 6146  | 6  | 1 | 1  | Low-quality | 8.56 |
| Sample_C1B_k141_207166            | 5357  | 7  | 1 | 1  | Low-quality | 8.55 |
| Sample_C1C_k141_19369             | 5229  | 5  | 0 | 1  | Low-quality | 8.55 |
| Sample_T8A_k141_79855             | 5779  | 8  | 0 | 1  | Low-quality | 8.55 |
| Sample_C14A_k141_167324           | 7087  | 7  | 2 | 0  | Low-quality | 8.55 |
| Sample_T7A_k141_181044            | 5137  | 11 | 3 | 0  | Low-quality | 8.55 |
| Sample_T8C_k141_160762            | 5558  | 5  | 0 | 1  | Low-quality | 8.55 |
| Sample_T4B_k141_22317             | 17349 | 15 | 0 | 12 | Low-quality | 8.54 |
| Sample_T5C_k141_19830             | 5641  | 4  | 1 | 0  | Low-quality | 8.54 |
| Sample_T2B_k141_293479_fragment_2 | 12707 | 13 | 1 | 2  | Low-quality | 8.54 |
| Sample_T11B_k141_78321            | 23948 | 23 | 1 | 10 | Low-quality | 8.53 |
| Sample_T4B_k141_342552            | 12982 | 16 | 0 | 10 | Low-quality | 8.53 |
| Sample_C2B_k141_221394            | 5171  | 8  | 1 | 0  | Low-quality | 8.53 |
| Sample_C1A_k141_183893            | 5112  | 4  | 0 | 2  | Low-quality | 8.52 |
| Sample_C4A_k141_25008             | 5006  | 3  | 2 | 0  | Low-quality | 8.52 |
| Sample_T17C_k141_1635             | 7593  | 8  | 0 | 2  | Low-quality | 8.52 |
| Sample_T18C_k141_173              | 7082  | 6  | 1 | 1  | Low-quality | 8.52 |
| Sample_C4C_k141_15444             | 12273 | 5  | 3 | 0  | Low-quality | 8.52 |
| Sample_T18A_k141_192387           | 5101  | 4  | 0 | 0  | Low-quality | 8.52 |
| Sample_T11C_k141_2220             | 11421 | 8  | 0 | 1  | Low-quality | 8.51 |
| Sample_T12C_k141_166859           | 6226  | 5  | 0 | 2  | Low-quality | 8.51 |
| Sample_T1A_k141_6655              | 15683 | 22 | 1 | 1  | Low-quality | 8.51 |
| Sample_C9A_k141_11736             | 15161 | 25 | 2 | 0  | Low-quality | 8.51 |
| Sample_T10A_k141_99607            | 14559 | 29 | 1 | 1  | Low-quality | 8.51 |
| Sample_T14A_k141_158293           | 19576 | 22 | 3 | 4  | Low-quality | 8.5  |
| Sample_C8B_k141_81341             | 5345  | 12 | 4 | 0  | Low-quality | 8.5  |
| Sample_C9C_k141_58896             | 20913 | 22 | 1 | 4  | Low-quality | 8.5  |
| Sample_C3B_k141_58293             | 15667 | 12 | 0 | 9  | Low-quality | 8.49 |
| Sample_C5A_k141_213084            | 46487 | 39 | 1 | 32 | Low-quality | 8.49 |
| Sample_T11A_k141_20233            | 13503 | 20 | 2 | 0  | Low-quality | 8.49 |
| Sample_T8C_k141_26079             | 5082  | 7  | 0 | 0  | Low-quality | 8.49 |
| Sample_C2C_k141_302734            | 8973  | 11 | 4 | 0  | Low-quality | 8.49 |
| Sample_C4B_k141_219158            | 5205  | 7  | 5 | 0  | Low-quality | 8.49 |

|                                   |       |    |   |    |             |      |
|-----------------------------------|-------|----|---|----|-------------|------|
| Sample_T12B_k141_135570           | 5263  | 7  | 7 | 0  | Low-quality | 8.49 |
| Sample_T6C_k141_268882            | 5168  | 5  | 2 | 1  | Low-quality | 8.49 |
| Sample_C5C_k141_16832             | 23810 | 20 | 1 | 6  | Low-quality | 8.48 |
| Sample_C8B_k141_16798             | 5303  | 3  | 0 | 1  | Low-quality | 8.48 |
| Sample_T17B_k141_13037            | 11307 | 12 | 0 | 3  | Low-quality | 8.48 |
| Sample_T8A_k141_109889            | 5612  | 8  | 2 | 0  | Low-quality | 8.48 |
| Sample_T8B_k141_22591             | 6049  | 13 | 2 | 0  | Low-quality | 8.48 |
| Sample_C2A_k141_290688            | 6681  | 10 | 0 | 1  | Low-quality | 8.47 |
| Sample_C3B_k141_179438            | 8562  | 7  | 0 | 6  | Low-quality | 8.47 |
| Sample_T16B_k141_30710            | 13165 | 14 | 1 | 7  | Low-quality | 8.47 |
| Sample_T2B_k141_148875            | 7888  | 8  | 0 | 5  | Low-quality | 8.47 |
| Sample_C2A_k141_129222            | 10927 | 12 | 3 | 0  | Low-quality | 8.47 |
| Sample_C7A_k141_48527             | 5029  | 6  | 0 | 2  | Low-quality | 8.46 |
| Sample_T14A_k141_150501           | 5221  | 5  | 3 | 0  | Low-quality | 8.46 |
| Sample_C13A_k141_46223            | 16540 | 15 | 0 | 7  | Low-quality | 8.45 |
| Sample_C13B_k141_10641            | 8628  | 3  | 0 | 3  | Low-quality | 8.45 |
| Sample_C1C_k141_55249             | 14190 | 13 | 1 | 10 | Low-quality | 8.44 |
| Sample_T3B_k141_57241             | 14963 | 12 | 0 | 12 | Low-quality | 8.44 |
| Sample_C12A_k141_68090            | 6741  | 9  | 0 | 2  | Low-quality | 8.44 |
| Sample_C7A_k141_100230_fragment_3 | 13046 | 11 | 1 | 0  | Low-quality | 8.44 |
| Sample_T11C_k141_98723            | 5579  | 5  | 1 | 0  | Low-quality | 8.44 |
| Sample_T13B_k141_17416            | 13937 | 15 | 2 | 1  | Low-quality | 8.44 |
| Sample_C7C_k141_11781             | 5050  | 6  | 0 | 0  | Low-quality | 8.43 |
| Sample_C11C_k141_12061            | 9901  | 13 | 1 | 0  | Low-quality | 8.43 |
| Sample_T11A_k141_70207            | 7911  | 13 | 0 | 1  | Low-quality | 8.42 |
| Sample_C1C_k141_106163            | 6101  | 5  | 4 | 0  | Low-quality | 8.42 |
| Sample_T3C_k141_136429            | 5009  | 6  | 0 | 1  | Low-quality | 8.42 |
| Sample_C10A_k141_263461           | 5555  | 6  | 1 | 0  | Low-quality | 8.41 |
| Sample_C10A_k141_263492           | 5555  | 6  | 1 | 0  | Low-quality | 8.41 |
| Sample_C2B_k141_106528            | 19868 | 23 | 1 | 17 | Low-quality | 8.41 |
| Sample_C6C_k141_122984            | 9090  | 9  | 0 | 6  | Low-quality | 8.41 |
| Sample_T10A_k141_23526            | 7896  | 8  | 0 | 1  | Low-quality | 8.41 |
| Sample_T2C_k141_218929            | 15073 | 17 | 1 | 2  | Low-quality | 8.41 |
| Sample_C7C_k141_21403             | 5273  | 15 | 1 | 0  | Low-quality | 8.41 |
| Sample_T7A_k141_14810             | 5253  | 6  | 0 | 0  | Low-quality | 8.41 |
| Sample_C10C_k141_107874           | 5439  | 6  | 0 | 1  | Low-quality | 8.4  |
| Sample_C3A_k141_35793             | 12503 | 12 | 1 | 3  | Low-quality | 8.4  |
| Sample_C4C_k141_197054            | 11252 | 14 | 1 | 0  | Low-quality | 8.4  |
| Sample_C4B_k141_18137             | 5182  | 15 | 2 | 0  | Low-quality | 8.4  |

|                                   |       |    |   |    |             |      |
|-----------------------------------|-------|----|---|----|-------------|------|
| Sample_T15C_k141_84017_fragment_1 | 12490 | 16 | 1 | 0  | Low-quality | 8.4  |
| Sample_C12C_k141_40617            | 8811  | 9  | 0 | 1  | Low-quality | 8.39 |
| Sample_T17A_k141_27235            | 5016  | 6  | 0 | 0  | Low-quality | 8.38 |
| Sample_T8B_k141_86582             | 23526 | 21 | 1 | 3  | Low-quality | 8.38 |
| Sample_C10C_k141_128493           | 7708  | 7  | 0 | 1  | Low-quality | 8.37 |
| Sample_C5A_k141_248137            | 5747  | 7  | 0 | 4  | Low-quality | 8.37 |
| Sample_T1B_k141_26780             | 13023 | 12 | 0 | 4  | Low-quality | 8.37 |
| Sample_T4B_k141_94946             | 12167 | 10 | 0 | 6  | Low-quality | 8.37 |
| Sample_C4B_k141_73109             | 5347  | 6  | 1 | 0  | Low-quality | 8.37 |
| Sample_T18B_k141_17474            | 6139  | 10 | 2 | 0  | Low-quality | 8.37 |
| Sample_C5A_k141_83705             | 9031  | 6  | 0 | 2  | Low-quality | 8.36 |
| Sample_T15B_k141_1119             | 14981 | 11 | 1 | 2  | Low-quality | 8.36 |
| Sample_T7A_k141_127718            | 8354  | 4  | 0 | 0  | Low-quality | 8.36 |
| Sample_C10C_k141_71544            | 5053  | 10 | 5 | 0  | Low-quality | 8.36 |
| Sample_C4C_k141_189732            | 5133  | 12 | 2 | 0  | Low-quality | 8.36 |
| Sample_T15A_k141_128747           | 14700 | 27 | 0 | 1  | Low-quality | 8.36 |
| Sample_T18C_k141_33277            | 10653 | 4  | 0 | 2  | Low-quality | 8.35 |
| Sample_T10B_k141_24411            | 8828  | 6  | 0 | 5  | Low-quality | 8.33 |
| Sample_T11A_k141_140597           | 20087 | 7  | 0 | 1  | Low-quality | 8.33 |
| Sample_T11B_k141_97475            | 6619  | 7  | 0 | 2  | Low-quality | 8.33 |
| Sample_T6C_k141_86740             | 14968 | 20 | 2 | 4  | Low-quality | 8.33 |
| Sample_C12C_k141_140873           | 12454 | 18 | 2 | 2  | Low-quality | 8.33 |
| Sample_C6C_k141_159739            | 7027  | 12 | 1 | 1  | Low-quality | 8.33 |
| Sample_T14A_k141_125638           | 5141  | 8  | 6 | 0  | Low-quality | 8.33 |
| Sample_T5A_k141_21291             | 8254  | 10 | 3 | 0  | Low-quality | 8.33 |
| Sample_T8B_k141_83321             | 5226  | 9  | 5 | 0  | Low-quality | 8.33 |
| Sample_C2B_k141_262211            | 6705  | 4  | 0 | 0  | Low-quality | 8.32 |
| Sample_C7A_k141_68409             | 15385 | 15 | 0 | 8  | Low-quality | 8.32 |
| Sample_C8C_k141_106212            | 12776 | 13 | 0 | 2  | Low-quality | 8.32 |
| Sample_T8A_k141_222110            | 18480 | 19 | 0 | 11 | Low-quality | 8.32 |
| Sample_C13A_k141_12642            | 13340 | 11 | 0 | 0  | Low-quality | 8.32 |
| Sample_T18C_k141_149179           | 7422  | 13 | 0 | 0  | Low-quality | 8.32 |
| Sample_T10C_k141_81264            | 6718  | 8  | 1 | 3  | Low-quality | 8.31 |
| Sample_T15C_k141_65960            | 14222 | 14 | 1 | 3  | Low-quality | 8.31 |
| Sample_T1A_k141_12609             | 10987 | 12 | 0 | 6  | Low-quality | 8.31 |
| Sample_T2A_k141_127212            | 6179  | 10 | 0 | 0  | Low-quality | 8.31 |
| Sample_T6A_k141_28762             | 10854 | 11 | 0 | 1  | Low-quality | 8.31 |
| Sample_C12B_k141_81744            | 5765  | 6  | 1 | 1  | Low-quality | 8.31 |
| Sample_C14A_k141_138562           | 5085  | 7  | 3 | 0  | Low-quality | 8.31 |

|                                 |       |    |   |    |             |      |
|---------------------------------|-------|----|---|----|-------------|------|
| Sample_T10C_k141_24312          | 11074 | 16 | 1 | 0  | Low-quality | 8.31 |
| Sample_C2C_k141_175987          | 6786  | 8  | 0 | 2  | Low-quality | 8.3  |
| Sample_C3B_k141_34617           | 8967  | 9  | 0 | 2  | Low-quality | 8.3  |
| Sample_C5A_k141_190276          | 5486  | 11 | 1 | 0  | Low-quality | 8.3  |
| Sample_T8A_k141_144721          | 5106  | 12 | 1 | 0  | Low-quality | 8.29 |
| Sample_C1B_k141_19613           | 8441  | 11 | 1 | 0  | Low-quality | 8.29 |
| Sample_C3A_k141_155460          | 7301  | 15 | 6 | 0  | Low-quality | 8.29 |
| Sample_C9A_k141_69445           | 5553  | 12 | 5 | 0  | Low-quality | 8.29 |
| Sample_C11A_k141_75010          | 5058  | 6  | 2 | 0  | Low-quality | 8.28 |
| Sample_C6B_k141_98391           | 6096  | 4  | 0 | 2  | Low-quality | 8.28 |
| Sample_T10B_k141_141346         | 5426  | 12 | 0 | 0  | Low-quality | 8.28 |
| Sample_C5B_k141_63669           | 5197  | 10 | 6 | 0  | Low-quality | 8.28 |
| Sample_T12B_k141_156462         | 13183 | 37 | 1 | 0  | Low-quality | 8.28 |
| Sample_T8B_k141_194816          | 5365  | 5  | 1 | 1  | Low-quality | 8.28 |
| Sample_T14B_k141_114735         | 13850 | 16 | 1 | 10 | Low-quality | 8.27 |
| Sample_T15A_k141_56481          | 5427  | 5  | 0 | 2  | Low-quality | 8.27 |
| Sample_T12B_k141_18340          | 12630 | 12 | 1 | 0  | Low-quality | 8.27 |
| Sample_T7A_k141_5907_fragment_1 | 13068 | 14 | 2 | 2  | Low-quality | 8.27 |
| Sample_C12C_k141_199639         | 11791 | 9  | 1 | 0  | Low-quality | 8.26 |
| Sample_C3B_k141_261387          | 9774  | 10 | 0 | 2  | Low-quality | 8.26 |
| Sample_C9A_k141_109854          | 12047 | 10 | 0 | 7  | Low-quality | 8.26 |
| Sample_T5C_k141_30104           | 12292 | 13 | 1 | 0  | Low-quality | 8.26 |
| Sample_T13B_k141_125565         | 7991  | 8  | 0 | 2  | Low-quality | 8.25 |
| Sample_T11B_k141_33689          | 5295  | 5  | 1 | 0  | Low-quality | 8.25 |
| Sample_C2A_k141_203628          | 5527  | 11 | 2 | 0  | Low-quality | 8.24 |
| Sample_C12B_k141_30452          | 5290  | 5  | 0 | 1  | Low-quality | 8.23 |
| Sample_C3A_k141_259455          | 29062 | 39 | 1 | 7  | Low-quality | 8.23 |
| Sample_T10A_k141_111211         | 14363 | 14 | 0 | 11 | Low-quality | 8.23 |
| Sample_T10C_k141_3842           | 17207 | 21 | 4 | 11 | Low-quality | 8.23 |
| Sample_T12C_k141_37617          | 13124 | 18 | 2 | 10 | Low-quality | 8.23 |
| Sample_C11C_k141_73804          | 7172  | 8  | 2 | 0  | Low-quality | 8.23 |
| Sample_C2C_k141_113432          | 13047 | 11 | 4 | 0  | Low-quality | 8.23 |
| Sample_T14A_k141_60261          | 5358  | 13 | 1 | 0  | Low-quality | 8.23 |
| Sample_T3A_k141_44350           | 5093  | 9  | 1 | 0  | Low-quality | 8.23 |
| Sample_C12C_k141_81038          | 5054  | 10 | 1 | 0  | Low-quality | 8.22 |
| Sample_C10A_k141_87332          | 5261  | 3  | 0 | 0  | Low-quality | 8.21 |
| Sample_T12A_k141_116293         | 10197 | 6  | 0 | 6  | Low-quality | 8.21 |
| Sample_C10C_k141_59481          | 5527  | 9  | 2 | 0  | Low-quality | 8.21 |
| Sample_T4C_k141_38333           | 6874  | 5  | 1 | 1  | Low-quality | 8.21 |

|                                   |       |    |   |    |             |      |
|-----------------------------------|-------|----|---|----|-------------|------|
| Sample_C9B_k141_25509             | 8477  | 6  | 0 | 3  | Low-quality | 8.2  |
| Sample_T2C_k141_39262             | 5888  | 5  | 0 | 0  | Low-quality | 8.2  |
| Sample_T13B_k141_129233           | 8611  | 11 | 0 | 3  | Low-quality | 8.19 |
| Sample_T12A_k141_204056           | 6585  | 11 | 3 | 0  | Low-quality | 8.19 |
| Sample_T18A_k141_112245           | 7686  | 11 | 0 | 2  | Low-quality | 8.18 |
| Sample_C1C_k141_36289             | 9037  | 18 | 1 | 0  | Low-quality | 8.18 |
| Sample_C9A_k141_13645             | 5336  | 8  | 1 | 1  | Low-quality | 8.18 |
| Sample_T5B_k141_60165             | 16188 | 15 | 3 | 6  | Low-quality | 8.17 |
| Sample_T12B_k141_54776_fragment_1 | 9943  | 9  | 0 | 1  | Low-quality | 8.17 |
| Sample_T2B_k141_114784            | 12476 | 16 | 2 | 0  | Low-quality | 8.17 |
| Sample_C3B_k141_94315             | 16651 | 16 | 1 | 12 | Low-quality | 8.16 |
| Sample_T8B_k141_154844            | 5144  | 8  | 1 | 0  | Low-quality | 8.16 |
| Sample_C3C_k141_65863             | 20051 | 23 | 1 | 2  | Low-quality | 8.15 |
| Sample_C4A_k141_110591            | 6385  | 3  | 0 | 2  | Low-quality | 8.15 |
| Sample_T6A_k141_185970            | 7825  | 8  | 0 | 0  | Low-quality | 8.15 |
| Sample_C4C_k141_196580            | 5551  | 8  | 1 | 0  | Low-quality | 8.15 |
| Sample_C7C_k141_55736             | 8771  | 4  | 0 | 0  | Low-quality | 8.15 |
| Sample_T7A_k141_15840_fragment_1  | 6586  | 10 | 1 | 0  | Low-quality | 8.15 |
| Sample_C3C_k141_205715            | 11745 | 9  | 0 | 7  | Low-quality | 8.14 |
| Sample_T2A_k141_24205             | 14219 | 17 | 0 | 13 | Low-quality | 8.14 |
| Sample_C1B_k141_208153            | 14116 | 15 | 6 | 1  | Low-quality | 8.14 |
| Sample_C1C_k141_52777             | 11333 | 9  | 0 | 0  | Low-quality | 8.14 |
| Sample_C4B_k141_186454            | 6968  | 12 | 3 | 0  | Low-quality | 8.14 |
| Sample_C4B_k141_158038            | 5506  | 8  | 3 | 1  | Low-quality | 8.14 |
| Sample_T4B_k141_285130            | 6403  | 9  | 6 | 0  | Low-quality | 8.14 |
| Sample_C11C_k141_82781            | 7314  | 5  | 0 | 0  | Low-quality | 8.13 |
| Sample_T14A_k141_57215            | 21805 | 18 | 2 | 4  | Low-quality | 8.13 |
| Sample_T4B_k141_177623            | 16725 | 18 | 0 | 11 | Low-quality | 8.13 |
| Sample_C8B_k141_148506            | 5886  | 4  | 0 | 1  | Low-quality | 8.12 |
| Sample_T10A_k141_59703            | 20160 | 17 | 1 | 9  | Low-quality | 8.12 |
| Sample_T12B_k141_145642           | 10287 | 13 | 1 | 0  | Low-quality | 8.12 |
| Sample_T14B_k141_67269            | 6930  | 8  | 0 | 2  | Low-quality | 8.12 |
| Sample_T10A_k141_153470           | 6267  | 7  | 2 | 0  | Low-quality | 8.12 |
| Sample_T8B_k141_64638             | 5364  | 6  | 1 | 0  | Low-quality | 8.12 |
| Sample_C3C_k141_257348            | 5269  | 10 | 0 | 0  | Low-quality | 8.11 |
| Sample_T14A_k141_181059           | 8103  | 10 | 0 | 1  | Low-quality | 8.11 |
| Sample_T17A_k141_15621            | 8208  | 9  | 0 | 2  | Low-quality | 8.11 |
| Sample_T12C_k141_193338           | 13527 | 17 | 5 | 0  | Low-quality | 8.11 |
| Sample_T14A_k141_237847           | 7227  | 7  | 1 | 0  | Low-quality | 8.11 |



|                                   |       |    |   |    |             |      |
|-----------------------------------|-------|----|---|----|-------------|------|
| Sample_T5C_k141_153867            | 5233  | 9  | 2 | 0  | Low-quality | 8.11 |
| Sample_C9C_k141_92756             | 6381  | 7  | 3 | 0  | Low-quality | 8.1  |
| Sample_T13A_k141_59892            | 8811  | 10 | 0 | 2  | Low-quality | 8.1  |
| Sample_T14A_k141_127158           | 5283  | 13 | 2 | 0  | Low-quality | 8.1  |
| Sample_T8C_k141_61879             | 6445  | 11 | 4 | 0  | Low-quality | 8.1  |
| Sample_T10A_k141_145232           | 5007  | 2  | 1 | 0  | Low-quality | 8.09 |
| Sample_C12C_k141_44371            | 7628  | 11 | 1 | 0  | Low-quality | 8.09 |
| Sample_C9A_k141_97258             | 5317  | 6  | 3 | 0  | Low-quality | 8.09 |
| Sample_T15B_k141_94586            | 7010  | 15 | 1 | 0  | Low-quality | 8.09 |
| Sample_T6A_k141_37631             | 12404 | 22 | 0 | 1  | Low-quality | 8.09 |
| Sample_T2C_k141_169200            | 8842  | 12 | 0 | 0  | Low-quality | 8.08 |
| Sample_T11C_k141_30217_fragment_1 | 14902 | 19 | 3 | 0  | Low-quality | 8.08 |
| Sample_T11C_k141_134623           | 6656  | 12 | 5 | 0  | Low-quality | 8.08 |
| Sample_T16C_k141_95543            | 5338  | 5  | 1 | 0  | Low-quality | 8.08 |
| Sample_T4B_k141_68831             | 6350  | 11 | 1 | 0  | Low-quality | 8.08 |
| Sample_C6A_k141_170876            | 5899  | 9  | 2 | 1  | Low-quality | 8.07 |
| Sample_C6B_k141_93648             | 5334  | 7  | 1 | 0  | Low-quality | 8.07 |
| Sample_T16C_k141_120889           | 14304 | 15 | 0 | 2  | Low-quality | 8.07 |
| Sample_C10B_k141_21688            | 5152  | 10 | 3 | 1  | Low-quality | 8.07 |
| Sample_C1A_k141_245960            | 6594  | 9  | 0 | 0  | Low-quality | 8.07 |
| Sample_T1A_k141_18883             | 11182 | 19 | 1 | 5  | Low-quality | 8.06 |
| Sample_T4B_k141_242811            | 6320  | 10 | 0 | 0  | Low-quality | 8.06 |
| Sample_C11A_k141_58104            | 9503  | 13 | 0 | 2  | Low-quality | 8.06 |
| Sample_C2C_k141_151011            | 7112  | 4  | 1 | 0  | Low-quality | 8.06 |
| Sample_C3A_k141_50538             | 9220  | 16 | 2 | 0  | Low-quality | 8.05 |
| Sample_T6B_k141_186943            | 7233  | 4  | 0 | 1  | Low-quality | 8.04 |
| Sample_C3A_k141_108820            | 5336  | 8  | 3 | 1  | Low-quality | 8.04 |
| Sample_T4C_k141_78229             | 5006  | 7  | 0 | 0  | Low-quality | 8.04 |
| Sample_C3B_k141_89941             | 6320  | 8  | 0 | 2  | Low-quality | 8.03 |
| Sample_C5C_k141_14968             | 7057  | 8  | 0 | 1  | Low-quality | 8.03 |
| Sample_T10A_k141_282              | 11884 | 11 | 0 | 10 | Low-quality | 8.03 |
| Sample_T11B_k141_118029           | 8693  | 8  | 0 | 2  | Low-quality | 8.03 |
| Sample_T2A_k141_146423            | 5322  | 3  | 0 | 1  | Low-quality | 8.03 |
| Sample_C3A_k141_171928            | 8494  | 6  | 5 | 0  | Low-quality | 8.03 |
| Sample_T5A_k141_46271             | 7417  | 18 | 0 | 0  | Low-quality | 8.03 |
| Sample_T12A_k141_147427           | 5490  | 6  | 0 | 1  | Low-quality | 8.02 |
| Sample_T2B_k141_859               | 5900  | 1  | 0 | 0  | Low-quality | 8.02 |
| Sample_T4B_k141_270086            | 13454 | 10 | 1 | 3  | Low-quality | 8.02 |
| Sample_C11B_k141_40819            | 8795  | 12 | 3 | 0  | Low-quality | 8.02 |

|                                   |       |    |   |    |             |      |
|-----------------------------------|-------|----|---|----|-------------|------|
| Sample_C1B_k141_203659            | 6653  | 13 | 2 | 1  | Low-quality | 8.02 |
| Sample_T5C_k141_81188_fragment_2  | 8181  | 13 | 2 | 0  | Low-quality | 8.02 |
| Sample_C14B_k141_1042             | 15442 | 27 | 1 | 3  | Low-quality | 8.01 |
| Sample_T8B_k141_62505             | 8653  | 9  | 0 | 2  | Low-quality | 8.01 |
| Sample_T2B_k141_106348            | 5010  | 15 | 1 | 0  | Low-quality | 8.01 |
| Sample_C10B_k141_116676           | 16058 | 12 | 0 | 9  | Low-quality | 8    |
| Sample_C5A_k141_210417            | 5976  | 6  | 0 | 2  | Low-quality | 8    |
| Sample_T6C_k141_31206             | 5171  | 7  | 0 | 3  | Low-quality | 8    |
| Sample_T7C_k141_4626              | 6537  | 8  | 0 | 2  | Low-quality | 8    |
| Sample_T18A_k141_67911            | 6124  | 8  | 1 | 0  | Low-quality | 8    |
| Sample_T8A_k141_234211            | 5023  | 6  | 0 | 0  | Low-quality | 8    |
| Sample_C10A_k141_27270            | 22906 | 21 | 0 | 17 | Low-quality | 7.99 |
| Sample_C14C_k141_34954_fragment_1 | 7314  | 15 | 3 | 0  | Low-quality | 7.98 |
| Sample_T17C_k141_34741            | 7512  | 10 | 2 | 0  | Low-quality | 7.98 |
| Sample_T6C_k141_76772             | 15655 | 16 | 0 | 9  | Low-quality | 7.97 |
| Sample_T11C_k141_90916            | 8201  | 11 | 0 | 6  | Low-quality | 7.96 |
| Sample_T7C_k141_3377              | 7993  | 3  | 0 | 1  | Low-quality | 7.96 |
| Sample_C2B_k141_315               | 6475  | 12 | 3 | 0  | Low-quality | 7.96 |
| Sample_C13A_k141_27850            | 30589 | 32 | 2 | 5  | Low-quality | 7.95 |
| Sample_T11B_k141_161940           | 6470  | 4  | 0 | 0  | Low-quality | 7.95 |
| Sample_T14C_k141_6727             | 5678  | 2  | 0 | 0  | Low-quality | 7.95 |
| Sample_C7C_k141_83029             | 13193 | 20 | 2 | 0  | Low-quality | 7.95 |
| Sample_C1C_k141_159207            | 44188 | 38 | 2 | 22 | Low-quality | 7.94 |
| Sample_T16B_k141_109381           | 7970  | 9  | 0 | 2  | Low-quality | 7.94 |
| Sample_T5B_k141_74483             | 12675 | 10 | 1 | 2  | Low-quality | 7.94 |
| Sample_T12B_k141_160141           | 8158  | 10 | 2 | 0  | Low-quality | 7.94 |
| Sample_T1C_k141_2733              | 5940  | 8  | 0 | 0  | Low-quality | 7.94 |
| Sample_C11C_k141_68805            | 7104  | 9  | 2 | 0  | Low-quality | 7.93 |
| Sample_C2A_k141_25958_fragment_1  | 24337 | 27 | 1 | 3  | Low-quality | 7.93 |
| Sample_C2B_k141_286900_fragment_1 | 14462 | 14 | 2 | 0  | Low-quality | 7.93 |
| Sample_T6B_k141_100636            | 12549 | 11 | 1 | 9  | Low-quality | 7.92 |
| Sample_C12B_k141_23095            | 5237  | 5  | 1 | 0  | Low-quality | 7.92 |
| Sample_T12C_k141_107891           | 10105 | 13 | 0 | 1  | Low-quality | 7.92 |
| Sample_T8B_k141_257898            | 6764  | 8  | 6 | 1  | Low-quality | 7.92 |
| Sample_C1C_k141_175418            | 6639  | 10 | 1 | 0  | Low-quality | 7.91 |
| Sample_C7A_k141_146846            | 9598  | 9  | 0 | 4  | Low-quality | 7.91 |
| Sample_T10A_k141_60037            | 5164  | 8  | 0 | 1  | Low-quality | 7.91 |
| Sample_T5A_k141_12062             | 7842  | 6  | 0 | 0  | Low-quality | 7.91 |
| Sample_C2A_k141_26876             | 6369  | 3  | 1 | 0  | Low-quality | 7.9  |

|                                    |       |    |   |    |             |      |
|------------------------------------|-------|----|---|----|-------------|------|
| Sample_T7C_k141_82578              | 14573 | 23 | 1 | 2  | Low-quality | 7.9  |
| Sample_T1C_k141_17208              | 7555  | 8  | 0 | 1  | Low-quality | 7.9  |
| Sample_T13C_k141_3112              | 6451  | 6  | 0 | 1  | Low-quality | 7.89 |
| Sample_C4C_k141_116964             | 8384  | 5  | 0 | 0  | Low-quality | 7.89 |
| Sample_T6B_k141_22983              | 5417  | 6  | 2 | 0  | Low-quality | 7.89 |
| Sample_T7A_k141_217624             | 6434  | 7  | 3 | 0  | Low-quality | 7.89 |
| Sample_C14C_k141_175338            | 13939 | 11 | 1 | 3  | Low-quality | 7.88 |
| Sample_C4A_k141_11730              | 5814  | 12 | 1 | 1  | Low-quality | 7.88 |
| Sample_C7C_k141_11760              | 9090  | 11 | 0 | 4  | Low-quality | 7.88 |
| Sample_T6A_k141_255022             | 19548 | 12 | 1 | 5  | Low-quality | 7.88 |
| Sample_T8C_k141_138117             | 98063 | 94 | 1 | 48 | Low-quality | 7.88 |
| Sample_C5C_k141_90344              | 13343 | 18 | 6 | 1  | Low-quality | 7.88 |
| Sample_C7A_k141_156327             | 5153  | 7  | 2 | 0  | Low-quality | 7.88 |
| Sample_C9B_k141_99404              | 6497  | 14 | 2 | 0  | Low-quality | 7.88 |
| Sample_T5B_k141_51863              | 6518  | 16 | 1 | 1  | Low-quality | 7.88 |
| Sample_C9A_k141_111256             | 9599  | 8  | 1 | 0  | Low-quality | 7.87 |
| Sample_T16B_k141_35686             | 5382  | 6  | 0 | 1  | Low-quality | 7.87 |
| Sample_C11B_k141_25533             | 6932  | 16 | 4 | 0  | Low-quality | 7.87 |
| Sample_C3A_k141_112057             | 6816  | 11 | 1 | 0  | Low-quality | 7.87 |
| Sample_C5A_k141_147213             | 7197  | 12 | 1 | 0  | Low-quality | 7.87 |
| Sample_C5A_k141_71509              | 5482  | 7  | 1 | 0  | Low-quality | 7.87 |
| Sample_T8C_k141_113637             | 8511  | 17 | 2 | 0  | Low-quality | 7.87 |
| Sample_C4A_k141_117910             | 10706 | 15 | 1 | 3  | Low-quality | 7.85 |
| Sample_T14C_k141_55274             | 5095  | 7  | 0 | 2  | Low-quality | 7.85 |
| Sample_C10C_k141_56636             | 8357  | 11 | 3 | 0  | Low-quality | 7.85 |
| Sample_C6A_k141_5088               | 42945 | 38 | 1 | 23 | Low-quality | 7.84 |
| Sample_T15A_k141_30995             | 8474  | 5  | 0 | 3  | Low-quality | 7.84 |
| Sample_T13C_k141_122601_fragment_1 | 5831  | 7  | 1 | 0  | Low-quality | 7.84 |
| Sample_C1A_k141_3031               | 7290  | 15 | 0 | 0  | Low-quality | 7.83 |
| Sample_C5C_k141_44377              | 15952 | 10 | 0 | 6  | Low-quality | 7.83 |
| Sample_T13B_k141_114712            | 16218 | 17 | 0 | 15 | Low-quality | 7.83 |
| Sample_T8A_k141_117605             | 19029 | 26 | 1 | 4  | Low-quality | 7.83 |
| Sample_T12C_k141_85543             | 5449  | 3  | 3 | 0  | Low-quality | 7.82 |
| Sample_T3B_k141_70283              | 10583 | 13 | 0 | 5  | Low-quality | 7.82 |
| Sample_C7B_k141_148562             | 13222 | 7  | 2 | 0  | Low-quality | 7.82 |
| Sample_T12A_k141_2940              | 5166  | 7  | 1 | 0  | Low-quality | 7.82 |
| Sample_T14B_k141_189176            | 12912 | 12 | 3 | 0  | Low-quality | 7.82 |
| Sample_T14C_k141_88954_fragment_2  | 10576 | 11 | 3 | 3  | Low-quality | 7.82 |
| Sample_C11A_k141_52506             | 13636 | 16 | 0 | 15 | Low-quality | 7.81 |

|                         |       |    |   |   |             |      |
|-------------------------|-------|----|---|---|-------------|------|
| Sample_C5C_k141_78821   | 9034  | 5  | 1 | 0 | Low-quality | 7.81 |
| Sample_T14C_k141_165977 | 6339  | 7  | 1 | 1 | Low-quality | 7.81 |
| Sample_T2A_k141_42578   | 8441  | 5  | 0 | 1 | Low-quality | 7.81 |
| Sample_C14C_k141_65456  | 8104  | 10 | 0 | 1 | Low-quality | 7.81 |
| Sample_T13C_k141_50008  | 5159  | 5  | 1 | 0 | Low-quality | 7.81 |
| Sample_T10A_k141_771    | 12814 | 14 | 1 | 2 | Low-quality | 7.8  |
| Sample_T8A_k141_84246   | 8430  | 8  | 0 | 3 | Low-quality | 7.8  |
| Sample_C4B_k141_164452  | 13443 | 9  | 0 | 8 | Low-quality | 7.79 |
| Sample_T12C_k141_91562  | 6179  | 7  | 2 | 0 | Low-quality | 7.79 |
| Sample_T15B_k141_150441 | 5211  | 13 | 3 | 0 | Low-quality | 7.78 |
| Sample_C10A_k141_281549 | 5810  | 8  | 2 | 0 | Low-quality | 7.78 |
| Sample_C5A_k141_4333    | 11957 | 8  | 3 | 0 | Low-quality | 7.78 |
| Sample_T18A_k141_185372 | 5144  | 4  | 1 | 0 | Low-quality | 7.78 |
| Sample_T6A_k141_88374   | 8532  | 8  | 0 | 1 | Low-quality | 7.77 |
| Sample_T5B_k141_79907   | 6344  | 7  | 0 | 1 | Low-quality | 7.76 |
| Sample_T12A_k141_34500  | 19074 | 22 | 3 | 0 | Low-quality | 7.76 |
| Sample_T14A_k141_1061   | 6856  | 12 | 2 | 0 | Low-quality | 7.76 |
| Sample_C11B_k141_104541 | 8378  | 5  | 0 | 4 | Low-quality | 7.75 |
| Sample_C9B_k141_5307    | 6922  | 7  | 1 | 0 | Low-quality | 7.75 |
| Sample_C3A_k141_242518  | 5559  | 7  | 2 | 0 | Low-quality | 7.75 |
| Sample_T13C_k141_33316  | 13891 | 12 | 1 | 1 | Low-quality | 7.75 |
| Sample_C10C_k141_120966 | 7367  | 9  | 1 | 7 | Low-quality | 7.74 |
| Sample_C3A_k141_26135   | 11512 | 14 | 1 | 3 | Low-quality | 7.74 |
| Sample_T16C_k141_55176  | 8138  | 6  | 0 | 4 | Low-quality | 7.74 |
| Sample_C10A_k141_145842 | 12576 | 31 | 2 | 0 | Low-quality | 7.74 |
| Sample_C10A_k141_189830 | 12486 | 10 | 1 | 3 | Low-quality | 7.74 |
| Sample_C6A_k141_137884  | 7080  | 13 | 1 | 0 | Low-quality | 7.74 |
| Sample_T2B_k141_113897  | 5747  | 8  | 1 | 1 | Low-quality | 7.74 |
| Sample_T6A_k141_1371    | 14495 | 12 | 0 | 0 | Low-quality | 7.74 |
| Sample_T7C_k141_60610   | 10312 | 9  | 4 | 0 | Low-quality | 7.74 |
| Sample_C7A_k141_113438  | 8917  | 9  | 0 | 3 | Low-quality | 7.73 |
| Sample_T13C_k141_78060  | 9142  | 12 | 0 | 7 | Low-quality | 7.72 |
| Sample_C4B_k141_29012   | 6353  | 8  | 4 | 0 | Low-quality | 7.72 |
| Sample_C9C_k141_54237   | 9140  | 6  | 0 | 2 | Low-quality | 7.71 |
| Sample_C13C_k141_103110 | 5311  | 10 | 3 | 1 | Low-quality | 7.71 |
| Sample_C3A_k141_59429   | 5468  | 12 | 0 | 0 | Low-quality | 7.71 |
| Sample_C3C_k141_215733  | 6474  | 10 | 1 | 1 | Low-quality | 7.71 |
| Sample_T14A_k141_94423  | 8514  | 6  | 0 | 0 | Low-quality | 7.71 |
| Sample_C10C_k141_88353  | 11037 | 16 | 1 | 0 | Low-quality | 7.7  |

|                                   |       |    |   |    |             |      |
|-----------------------------------|-------|----|---|----|-------------|------|
| Sample_C2A_k141_142482            | 12252 | 13 | 1 | 1  | Low-quality | 7.7  |
| Sample_C8B_k141_64545             | 21639 | 21 | 1 | 4  | Low-quality | 7.7  |
| Sample_T15A_k141_41110            | 5518  | 3  | 0 | 2  | Low-quality | 7.7  |
| Sample_T17C_k141_11852            | 7462  | 6  | 3 | 1  | Low-quality | 7.7  |
| Sample_T8B_k141_23085_fragment_1  | 12591 | 14 | 1 | 0  | Low-quality | 7.7  |
| Sample_C12A_k141_56971            | 14175 | 20 | 1 | 2  | Low-quality | 7.69 |
| Sample_C6B_k141_21685             | 6118  | 3  | 0 | 2  | Low-quality | 7.69 |
| Sample_C6C_k141_178879            | 15682 | 17 | 1 | 3  | Low-quality | 7.69 |
| Sample_C8C_k141_87973             | 29214 | 29 | 1 | 8  | Low-quality | 7.69 |
| Sample_C5A_k141_92609             | 7621  | 11 | 2 | 0  | Low-quality | 7.69 |
| Sample_T13C_k141_31111            | 5276  | 11 | 1 | 1  | Low-quality | 7.69 |
| Sample_C10C_k141_111256           | 5261  | 3  | 0 | 1  | Low-quality | 7.68 |
| Sample_C12A_k141_150237           | 9629  | 9  | 1 | 1  | Low-quality | 7.68 |
| Sample_T3C_k141_109718            | 10334 | 13 | 1 | 6  | Low-quality | 7.68 |
| Sample_C11C_k141_130278           | 13069 | 17 | 2 | 0  | Low-quality | 7.68 |
| Sample_C5C_k141_15272             | 13111 | 15 | 6 | 0  | Low-quality | 7.68 |
| Sample_T6A_k141_107604            | 6268  | 2  | 0 | 0  | Low-quality | 7.67 |
| Sample_T8B_k141_46522             | 13387 | 10 | 0 | 8  | Low-quality | 7.67 |
| Sample_C3A_k141_210139_fragment_1 | 7977  | 9  | 0 | 3  | Low-quality | 7.67 |
| Sample_T7B_k141_17961             | 5007  | 5  | 1 | 0  | Low-quality | 7.67 |
| Sample_T8C_k141_112840            | 5020  | 4  | 1 | 1  | Low-quality | 7.67 |
| Sample_T6C_k141_265908            | 15165 | 5  | 0 | 5  | Low-quality | 7.66 |
| Sample_C6B_k141_100316            | 5426  | 7  | 0 | 1  | Low-quality | 7.66 |
| Sample_C10A_k141_178001           | 6447  | 8  | 0 | 1  | Low-quality | 7.65 |
| Sample_T12A_k141_272447           | 29496 | 26 | 1 | 22 | Low-quality | 7.65 |
| Sample_T2B_k141_191436            | 14113 | 13 | 1 | 6  | Low-quality | 7.65 |
| Sample_C12B_k141_78892            | 5728  | 11 | 4 | 0  | Low-quality | 7.64 |
| Sample_T12A_k141_266587           | 6654  | 7  | 1 | 1  | Low-quality | 7.64 |
| Sample_T2A_k141_134189            | 14714 | 13 | 1 | 0  | Low-quality | 7.63 |
| Sample_C2B_k141_346634_fragment_1 | 13358 | 14 | 2 | 0  | Low-quality | 7.63 |
| Sample_T10B_k141_54751            | 5538  | 10 | 1 | 0  | Low-quality | 7.62 |
| Sample_T7A_k141_107525            | 10759 | 14 | 3 | 2  | Low-quality | 7.62 |
| Sample_T3C_k141_141744            | 5095  | 7  | 1 | 0  | Low-quality | 7.62 |
| Sample_C5C_k141_117086            | 5229  | 4  | 0 | 0  | Low-quality | 7.61 |
| Sample_T15B_k141_78782            | 13286 | 11 | 0 | 9  | Low-quality | 7.61 |
| Sample_C10A_k141_111454           | 8883  | 9  | 0 | 1  | Low-quality | 7.61 |
| Sample_T12A_k141_234285           | 18791 | 23 | 2 | 0  | Low-quality | 7.61 |
| Sample_C6A_k141_27947             | 10606 | 13 | 3 | 0  | Low-quality | 7.6  |
| Sample_C10A_k141_151514           | 15239 | 13 | 0 | 12 | Low-quality | 7.59 |

|                                    |        |     |   |     |             |      |
|------------------------------------|--------|-----|---|-----|-------------|------|
| Sample_C12C_k141_27955             | 5019   | 6   | 1 | 0   | Low-quality | 7.59 |
| Sample_T6A_k141_281282             | 27689  | 18  | 1 | 7   | Low-quality | 7.59 |
| Sample_C11B_k141_174665_fragment_1 | 11091  | 14  | 2 | 0   | Low-quality | 7.59 |
| Sample_C11B_k141_189433            | 5218   | 8   | 1 | 1   | Low-quality | 7.59 |
| Sample_T12C_k141_17771             | 11793  | 24  | 2 | 0   | Low-quality | 7.59 |
| Sample_T14C_k141_33441             | 5321   | 13  | 2 | 0   | Low-quality | 7.58 |
| Sample_T7B_k141_40996              | 13575  | 12  | 1 | 2   | Low-quality | 7.57 |
| Sample_C2A_k141_61829              | 6119   | 7   | 1 | 0   | Low-quality | 7.57 |
| Sample_C2C_k141_213376             | 8002   | 13  | 0 | 0   | Low-quality | 7.57 |
| Sample_T8B_k141_206257             | 8280   | 10  | 0 | 0   | Low-quality | 7.57 |
| Sample_T15B_k141_11774             | 8424   | 8   | 0 | 1   | Low-quality | 7.56 |
| Sample_C10C_k141_125284            | 8172   | 7   | 0 | 1   | Low-quality | 7.55 |
| Sample_T12A_k141_59352             | 6071   | 11  | 4 | 0   | Low-quality | 7.55 |
| Sample_T12B_k141_160291            | 6353   | 7   | 0 | 1   | Low-quality | 7.55 |
| Sample_T2C_k141_199969             | 15664  | 16  | 1 | 6   | Low-quality | 7.55 |
| Sample_C12A_k141_122094_fragment_1 | 13926  | 11  | 1 | 1   | Low-quality | 7.55 |
| Sample_T6B_k141_121138             | 12250  | 13  | 2 | 3   | Low-quality | 7.54 |
| Sample_T16B_k141_100928            | 8363   | 13  | 2 | 0   | Low-quality | 7.54 |
| Sample_C3A_k141_178011             | 5245   | 7   | 1 | 0   | Low-quality | 7.53 |
| Sample_T7A_k141_110899             | 6040   | 11  | 0 | 0   | Low-quality | 7.53 |
| Sample_T10A_k141_93517             | 6292   | 10  | 1 | 1   | Low-quality | 7.52 |
| Sample_C11C_k141_97048             | 324869 | 288 | 5 | 194 | Low-quality | 7.51 |
| Sample_C13A_k141_56282             | 6514   | 16  | 0 | 0   | Low-quality | 7.51 |
| Sample_T11C_k141_40076             | 8482   | 8   | 1 | 1   | Low-quality | 7.51 |
| Sample_C10C_k141_122236            | 5868   | 8   | 0 | 1   | Low-quality | 7.51 |
| Sample_T11B_k141_33974             | 5891   | 12  | 1 | 0   | Low-quality | 7.51 |
| Sample_T4A_k141_100934             | 6097   | 7   | 0 | 0   | Low-quality | 7.51 |
| Sample_C1A_k141_112999             | 6052   | 6   | 0 | 5   | Low-quality | 7.5  |
| Sample_C5A_k141_160487             | 7795   | 8   | 0 | 3   | Low-quality | 7.5  |
| Sample_T8B_k141_147743             | 12711  | 14  | 3 | 0   | Low-quality | 7.5  |
| Sample_T16B_k141_140886            | 5811   | 8   | 1 | 0   | Low-quality | 7.5  |
| Sample_C12A_k141_179657            | 5092   | 4   | 0 | 0   | Low-quality | 7.49 |
| Sample_T12C_k141_168682            | 5173   | 7   | 0 | 1   | Low-quality | 7.49 |
| Sample_T7A_k141_64629              | 10809  | 13  | 0 | 3   | Low-quality | 7.49 |
| Sample_C12C_k141_230919            | 5090   | 3   | 0 | 0   | Low-quality | 7.48 |
| Sample_T12A_k141_322541            | 10388  | 14  | 1 | 2   | Low-quality | 7.48 |
| Sample_T12A_k141_23142             | 12355  | 11  | 1 | 8   | Low-quality | 7.48 |
| Sample_T18C_k141_125829            | 44704  | 48  | 3 | 12  | Low-quality | 7.48 |
| Sample_T3B_k141_62883              | 7402   | 19  | 2 | 0   | Low-quality | 7.48 |

|                                   |       |    |   |    |             |      |
|-----------------------------------|-------|----|---|----|-------------|------|
| Sample_C11A_k141_25666            | 6805  | 5  | 0 | 0  | Low-quality | 7.47 |
| Sample_C4B_k141_14685             | 59348 | 36 | 2 | 18 | Low-quality | 7.47 |
| Sample_C5C_k141_44780             | 9272  | 6  | 0 | 6  | Low-quality | 7.47 |
| Sample_C2A_k141_322888            | 5014  | 9  | 4 | 0  | Low-quality | 7.47 |
| Sample_T8A_k141_134778            | 6099  | 7  | 0 | 2  | Low-quality | 7.46 |
| Sample_C4A_k141_139392            | 5192  | 7  | 1 | 0  | Low-quality | 7.46 |
| Sample_C11C_k141_154534           | 7068  | 8  | 0 | 3  | Low-quality | 7.45 |
| Sample_C8B_k141_62134             | 15176 | 12 | 0 | 11 | Low-quality | 7.45 |
| Sample_T14C_k141_139799           | 6281  | 8  | 0 | 1  | Low-quality | 7.45 |
| Sample_C2A_k141_302918            | 8138  | 9  | 1 | 3  | Low-quality | 7.44 |
| Sample_C2A_k141_190195            | 9272  | 11 | 1 | 2  | Low-quality | 7.44 |
| Sample_C2C_k141_274429            | 5044  | 6  | 1 | 1  | Low-quality | 7.44 |
| Sample_C4B_k141_228018            | 9958  | 21 | 5 | 0  | Low-quality | 7.44 |
| Sample_T6B_k141_30951             | 7057  | 5  | 0 | 1  | Low-quality | 7.44 |
| Sample_C13A_k141_110311           | 8344  | 7  | 0 | 2  | Low-quality | 7.43 |
| Sample_C3A_k141_134950            | 6074  | 15 | 1 | 0  | Low-quality | 7.42 |
| Sample_C6B_k141_19815             | 5103  | 7  | 0 | 2  | Low-quality | 7.42 |
| Sample_C8B_k141_45762             | 8021  | 12 | 1 | 0  | Low-quality | 7.42 |
| Sample_T12C_k141_114077           | 5675  | 14 | 0 | 1  | Low-quality | 7.41 |
| Sample_C3A_k141_29701             | 11806 | 13 | 1 | 1  | Low-quality | 7.41 |
| Sample_C3A_k141_101248            | 8090  | 8  | 4 | 0  | Low-quality | 7.41 |
| Sample_C6C_k141_51555             | 5796  | 1  | 0 | 0  | Low-quality | 7.4  |
| Sample_T5B_k141_80046             | 10571 | 4  | 0 | 0  | Low-quality | 7.4  |
| Sample_T7C_k141_14842             | 8668  | 7  | 0 | 2  | Low-quality | 7.4  |
| Sample_C3B_k141_221841_fragment_1 | 5784  | 10 | 3 | 1  | Low-quality | 7.4  |
| Sample_C4A_k141_249519            | 10768 | 17 | 9 | 0  | Low-quality | 7.4  |
| Sample_C4C_k141_22297             | 5290  | 3  | 2 | 0  | Low-quality | 7.39 |
| Sample_T15B_k141_57933            | 14454 | 19 | 1 | 2  | Low-quality | 7.39 |
| Sample_T2A_k141_148064            | 7839  | 6  | 0 | 2  | Low-quality | 7.39 |
| Sample_T5B_k141_63357             | 10846 | 10 | 0 | 1  | Low-quality | 7.39 |
| Sample_T6B_k141_107159_fragment_1 | 12868 | 13 | 1 | 0  | Low-quality | 7.39 |
| Sample_T12B_k141_160665           | 5733  | 4  | 0 | 1  | Low-quality | 7.38 |
| Sample_T4B_k141_198602            | 9816  | 7  | 0 | 2  | Low-quality | 7.38 |
| Sample_C5B_k141_13262             | 5360  | 13 | 3 | 0  | Low-quality | 7.38 |
| Sample_T12C_k141_140787           | 5809  | 11 | 1 | 0  | Low-quality | 7.38 |
| Sample_T4B_k141_333361            | 6128  | 10 | 0 | 2  | Low-quality | 7.38 |
| Sample_T2A_k141_57000             | 5243  | 3  | 0 | 1  | Low-quality | 7.37 |
| Sample_T8B_k141_164729            | 7090  | 3  | 0 | 1  | Low-quality | 7.37 |
| Sample_C2C_k141_188713            | 19041 | 28 | 2 | 2  | Low-quality | 7.36 |

|                         |       |    |   |    |             |      |
|-------------------------|-------|----|---|----|-------------|------|
| Sample_T8A_k141_207221  | 6559  | 6  | 1 | 1  | Low-quality | 7.36 |
| Sample_T12C_k141_1334   | 10060 | 21 | 2 | 2  | Low-quality | 7.35 |
| Sample_C9C_k141_8128    | 5037  | 6  | 1 | 0  | Low-quality | 7.35 |
| Sample_C8B_k141_57317   | 7027  | 12 | 0 | 0  | Low-quality | 7.34 |
| Sample_T3A_k141_6685    | 23016 | 24 | 0 | 12 | Low-quality | 7.34 |
| Sample_T4B_k141_22214   | 7788  | 5  | 0 | 4  | Low-quality | 7.34 |
| Sample_T8C_k141_151288  | 5933  | 9  | 1 | 3  | Low-quality | 7.34 |
| Sample_C10A_k141_314862 | 9129  | 13 | 1 | 2  | Low-quality | 7.33 |
| Sample_C7A_k141_160812  | 5140  | 11 | 1 | 0  | Low-quality | 7.33 |
| Sample_C6B_k141_70503   | 37631 | 32 | 0 | 28 | Low-quality | 7.32 |
| Sample_T15C_k141_48890  | 6237  | 7  | 1 | 1  | Low-quality | 7.32 |
| Sample_C11A_k141_110782 | 13483 | 15 | 1 | 8  | Low-quality | 7.31 |
| Sample_T12A_k141_147854 | 6219  | 6  | 0 | 4  | Low-quality | 7.31 |
| Sample_T12C_k141_178352 | 5760  | 13 | 2 | 1  | Low-quality | 7.3  |
| Sample_T3A_k141_40783   | 5007  | 7  | 1 | 1  | Low-quality | 7.3  |
| Sample_T12B_k141_105171 | 5312  | 3  | 0 | 0  | Low-quality | 7.29 |
| Sample_T17C_k141_7955   | 11272 | 15 | 1 | 2  | Low-quality | 7.29 |
| Sample_C7B_k141_103     | 8631  | 11 | 9 | 0  | Low-quality | 7.29 |
| Sample_T7C_k141_106935  | 5939  | 10 | 2 | 0  | Low-quality | 7.29 |
| Sample_C14C_k141_105429 | 23584 | 23 | 0 | 22 | Low-quality | 7.28 |
| Sample_C2B_k141_177466  | 5672  | 8  | 1 | 0  | Low-quality | 7.28 |
| Sample_C3B_k141_170991  | 9642  | 8  | 0 | 1  | Low-quality | 7.28 |
| Sample_C9A_k141_87889   | 14674 | 13 | 1 | 9  | Low-quality | 7.28 |
| Sample_T10C_k141_10486  | 5789  | 2  | 0 | 0  | Low-quality | 7.28 |
| Sample_T7A_k141_168483  | 20206 | 16 | 1 | 5  | Low-quality | 7.28 |
| Sample_C9B_k141_43376   | 6561  | 9  | 3 | 1  | Low-quality | 7.28 |
| Sample_C4C_k141_202056  | 14813 | 15 | 1 | 5  | Low-quality | 7.27 |
| Sample_T13B_k141_162515 | 5444  | 2  | 0 | 0  | Low-quality | 7.27 |
| Sample_T6A_k141_176531  | 10321 | 14 | 9 | 0  | Low-quality | 7.27 |
| Sample_C11B_k141_165051 | 14952 | 13 | 1 | 12 | Low-quality | 7.26 |
| Sample_C8C_k141_110149  | 7905  | 20 | 2 | 0  | Low-quality | 7.26 |
| Sample_T4A_k141_90320   | 7491  | 4  | 0 | 4  | Low-quality | 7.26 |
| Sample_C5A_k141_182428  | 15626 | 35 | 2 | 1  | Low-quality | 7.26 |
| Sample_T7A_k141_65487   | 5053  | 9  | 0 | 0  | Low-quality | 7.26 |
| Sample_C10A_k141_79488  | 77709 | 64 | 0 | 54 | Low-quality | 7.25 |
| Sample_T1B_k141_870     | 7273  | 7  | 1 | 0  | Low-quality | 7.25 |
| Sample_T15B_k141_35284  | 10885 | 13 | 0 | 4  | Low-quality | 7.25 |
| Sample_T8B_k141_181596  | 11723 | 23 | 5 | 0  | Low-quality | 7.25 |
| Sample_C12C_k141_230539 | 5081  | 5  | 0 | 1  | Low-quality | 7.24 |



|                         |       |    |   |    |             |      |
|-------------------------|-------|----|---|----|-------------|------|
| Sample_C1B_k141_3520    | 8898  | 8  | 0 | 3  | Low-quality | 7.24 |
| Sample_C2C_k141_177025  | 8327  | 4  | 0 | 0  | Low-quality | 7.24 |
| Sample_C7B_k141_169761  | 12652 | 14 | 2 | 0  | Low-quality | 7.24 |
| Sample_C1C_k141_167669  | 5300  | 5  | 0 | 3  | Low-quality | 7.23 |
| Sample_C6B_k141_116724  | 14712 | 9  | 3 | 1  | Low-quality | 7.23 |
| Sample_T8B_k141_114307  | 22525 | 25 | 0 | 10 | Low-quality | 7.23 |
| Sample_C8B_k141_197333  | 8974  | 6  | 0 | 1  | Low-quality | 7.23 |
| Sample_T8A_k141_155447  | 14589 | 34 | 6 | 0  | Low-quality | 7.23 |
| Sample_C6C_k141_32955   | 22846 | 26 | 0 | 17 | Low-quality | 7.22 |
| Sample_C8A_k141_22509   | 5170  | 7  | 2 | 0  | Low-quality | 7.22 |
| Sample_T15C_k141_146213 | 10327 | 7  | 1 | 1  | Low-quality | 7.22 |
| Sample_T8B_k141_29359   | 9198  | 9  | 0 | 6  | Low-quality | 7.22 |
| Sample_T12A_k141_1696   | 36410 | 39 | 0 | 36 | Low-quality | 7.21 |
| Sample_T14A_k141_23389  | 7228  | 6  | 1 | 1  | Low-quality | 7.21 |
| Sample_T8B_k141_84608   | 7778  | 6  | 0 | 1  | Low-quality | 7.21 |
| Sample_C10A_k141_219521 | 6001  | 8  | 3 | 0  | Low-quality | 7.21 |
| Sample_C10A_k141_178773 | 7620  | 5  | 0 | 3  | Low-quality | 7.2  |
| Sample_C10C_k141_111606 | 5259  | 6  | 0 | 4  | Low-quality | 7.2  |
| Sample_C4C_k141_68298   | 20813 | 18 | 0 | 13 | Low-quality | 7.2  |
| Sample_C10A_k141_253756 | 5460  | 4  | 2 | 0  | Low-quality | 7.2  |
| Sample_C8C_k141_13151   | 8967  | 10 | 1 | 2  | Low-quality | 7.2  |
| Sample_T12A_k141_188875 | 7119  | 8  | 3 | 0  | Low-quality | 7.2  |
| Sample_T12B_k141_52459  | 5724  | 15 | 1 | 2  | Low-quality | 7.2  |
| Sample_T8C_k141_3356    | 6279  | 15 | 3 | 0  | Low-quality | 7.2  |
| Sample_C11A_k141_21814  | 6546  | 3  | 0 | 1  | Low-quality | 7.19 |
| Sample_C1C_k141_100050  | 7317  | 3  | 0 | 0  | Low-quality | 7.19 |
| Sample_C5A_k141_155995  | 7159  | 5  | 1 | 1  | Low-quality | 7.19 |
| Sample_T2C_k141_174169  | 5605  | 10 | 0 | 1  | Low-quality | 7.19 |
| Sample_T8B_k141_130520  | 12366 | 15 | 1 | 10 | Low-quality | 7.19 |
| Sample_C6A_k141_70817   | 7607  | 4  | 0 | 4  | Low-quality | 7.18 |
| Sample_C8B_k141_47249   | 11835 | 17 | 2 | 2  | Low-quality | 7.18 |
| Sample_T12C_k141_167333 | 17431 | 22 | 0 | 4  | Low-quality | 7.18 |
| Sample_T14B_k141_63242  | 12870 | 18 | 1 | 0  | Low-quality | 7.18 |
| Sample_C13A_k141_39594  | 5260  | 5  | 0 | 1  | Low-quality | 7.17 |
| Sample_C4B_k141_57752   | 8431  | 7  | 0 | 6  | Low-quality | 7.17 |
| Sample_C5C_k141_24926   | 24471 | 22 | 0 | 21 | Low-quality | 7.17 |
| Sample_T11C_k141_65088  | 10079 | 14 | 0 | 2  | Low-quality | 7.17 |
| Sample_C9B_k141_53597   | 8498  | 11 | 1 | 0  | Low-quality | 7.16 |
| Sample_C13A_k141_81664  | 7751  | 7  | 0 | 1  | Low-quality | 7.15 |

|                         |       |    |   |    |             |      |
|-------------------------|-------|----|---|----|-------------|------|
| Sample_C13B_k141_115622 | 33351 | 32 | 1 | 8  | Low-quality | 7.15 |
| Sample_C13C_k141_78744  | 6637  | 1  | 0 | 0  | Low-quality | 7.15 |
| Sample_T16B_k141_161155 | 8116  | 10 | 0 | 4  | Low-quality | 7.15 |
| Sample_C6A_k141_200247  | 6204  | 8  | 1 | 0  | Low-quality | 7.14 |
| Sample_C8B_k141_173747  | 5878  | 10 | 0 | 2  | Low-quality | 7.14 |
| Sample_T10A_k141_112365 | 8798  | 11 | 1 | 2  | Low-quality | 7.14 |
| Sample_T12C_k141_37281  | 12666 | 16 | 2 | 0  | Low-quality | 7.14 |
| Sample_C1C_k141_194741  | 7581  | 8  | 1 | 0  | Low-quality | 7.14 |
| Sample_T6B_k141_91748   | 5288  | 6  | 2 | 0  | Low-quality | 7.14 |
| Sample_C14A_k141_77993  | 5870  | 7  | 0 | 0  | Low-quality | 7.13 |
| Sample_C5C_k141_113106  | 7152  | 2  | 0 | 1  | Low-quality | 7.13 |
| Sample_C6B_k141_64726   | 17892 | 13 | 0 | 11 | Low-quality | 7.13 |
| Sample_C6C_k141_111057  | 5773  | 9  | 0 | 0  | Low-quality | 7.13 |
| Sample_T12A_k141_65786  | 15394 | 9  | 0 | 6  | Low-quality | 7.13 |
| Sample_T15A_k141_44739  | 11305 | 19 | 2 | 2  | Low-quality | 7.13 |
| Sample_T4A_k141_2085    | 6352  | 4  | 0 | 1  | Low-quality | 7.13 |
| Sample_C1A_k141_84203   | 11037 | 11 | 0 | 8  | Low-quality | 7.12 |
| Sample_C2C_k141_207035  | 7991  | 4  | 1 | 0  | Low-quality | 7.12 |
| Sample_T1A_k141_16690   | 7540  | 4  | 0 | 1  | Low-quality | 7.12 |
| Sample_T15B_k141_9337   | 9255  | 9  | 1 | 0  | Low-quality | 7.12 |
| Sample_T10A_k141_92783  | 9217  | 16 | 1 | 0  | Low-quality | 7.11 |
| Sample_T4A_k141_15075   | 6804  | 6  | 0 | 0  | Low-quality | 7.11 |
| Sample_C11A_k141_90342  | 12582 | 13 | 1 | 0  | Low-quality | 7.11 |
| Sample_C4A_k141_125997  | 6202  | 8  | 1 | 1  | Low-quality | 7.11 |
| Sample_T2C_k141_43480   | 8838  | 17 | 3 | 1  | Low-quality | 7.11 |
| Sample_T10A_k141_56154  | 5746  | 2  | 0 | 0  | Low-quality | 7.1  |
| Sample_T12C_k141_19155  | 88111 | 85 | 1 | 39 | Low-quality | 7.1  |
| Sample_T15C_k141_145370 | 6393  | 5  | 0 | 1  | Low-quality | 7.1  |
| Sample_T5C_k141_177649  | 7021  | 8  | 1 | 1  | Low-quality | 7.1  |
| Sample_T17A_k141_20330  | 13576 | 16 | 2 | 0  | Low-quality | 7.1  |
| Sample_C10B_k141_52852  | 7411  | 5  | 0 | 4  | Low-quality | 7.09 |
| Sample_T12A_k141_185956 | 5751  | 7  | 1 | 1  | Low-quality | 7.09 |
| Sample_T5B_k141_71599   | 8394  | 5  | 0 | 2  | Low-quality | 7.09 |
| Sample_T6A_k141_64430   | 15008 | 11 | 0 | 9  | Low-quality | 7.09 |
| Sample_T6C_k141_55060   | 5837  | 7  | 0 | 0  | Low-quality | 7.09 |
| Sample_C12A_k141_131347 | 10267 | 24 | 0 | 0  | Low-quality | 7.08 |
| Sample_T2A_k141_99787   | 18893 | 14 | 0 | 9  | Low-quality | 7.08 |
| Sample_C11B_k141_72942  | 12044 | 25 | 1 | 1  | Low-quality | 7.08 |
| Sample_C12B_k141_199794 | 18633 | 22 | 2 | 0  | Low-quality | 7.08 |

|                                   |       |    |   |    |             |      |
|-----------------------------------|-------|----|---|----|-------------|------|
| Sample_T12B_k141_63180            | 5577  | 5  | 3 | 0  | Low-quality | 7.08 |
| Sample_T15A_k141_65896            | 9182  | 12 | 1 | 0  | Low-quality | 7.08 |
| Sample_C6B_k141_209765_fragment_2 | 5664  | 8  | 3 | 0  | Low-quality | 7.07 |
| Sample_T11B_k141_132895           | 9439  | 11 | 0 | 3  | Low-quality | 7.07 |
| Sample_T14A_k141_142638           | 10716 | 12 | 2 | 0  | Low-quality | 7.06 |
| Sample_T18C_k141_2890             | 5701  | 7  | 1 | 3  | Low-quality | 7.06 |
| Sample_T16B_k141_1818             | 6433  | 7  | 0 | 0  | Low-quality | 7.06 |
| Sample_C3A_k141_60909             | 6661  | 2  | 0 | 1  | Low-quality | 7.05 |
| Sample_T11B_k141_70250            | 5775  | 9  | 1 | 0  | Low-quality | 7.05 |
| Sample_T12C_k141_8444             | 5525  | 6  | 1 | 0  | Low-quality | 7.05 |
| Sample_T11A_k141_5902             | 32376 | 36 | 2 | 8  | Low-quality | 7.04 |
| Sample_C1A_k141_142201            | 5749  | 4  | 0 | 2  | Low-quality | 7.03 |
| Sample_C2C_k141_139019            | 11196 | 9  | 0 | 2  | Low-quality | 7.03 |
| Sample_T11B_k141_102040           | 5444  | 8  | 0 | 1  | Low-quality | 7.03 |
| Sample_T15C_k141_63904            | 16160 | 16 | 1 | 13 | Low-quality | 7.03 |
| Sample_T4B_k141_75625             | 7054  | 9  | 1 | 1  | Low-quality | 7.03 |
| Sample_C1B_k141_29602             | 5399  | 8  | 5 | 0  | Low-quality | 7.03 |
| Sample_T16B_k141_72743            | 11890 | 8  | 2 | 0  | Low-quality | 7.03 |
| Sample_T4A_k141_120864            | 6260  | 8  | 1 | 1  | Low-quality | 7.03 |
| Sample_C6B_k141_70693             | 9940  | 6  | 2 | 2  | Low-quality | 7.02 |
| Sample_C7B_k141_15009             | 7067  | 11 | 0 | 0  | Low-quality | 7.02 |
| Sample_T10B_k141_36799            | 5140  | 5  | 0 | 2  | Low-quality | 7.02 |
| Sample_T6A_k141_33559             | 6670  | 7  | 0 | 0  | Low-quality | 7.02 |
| Sample_T4B_k141_127323            | 13148 | 18 | 1 | 1  | Low-quality | 7.01 |
| Sample_T4C_k141_45627             | 5595  | 4  | 0 | 2  | Low-quality | 7.01 |
| Sample_T8B_k141_134182            | 9056  | 6  | 1 | 3  | Low-quality | 7.01 |
| Sample_C10C_k141_27860            | 5076  | 6  | 1 | 1  | Low-quality | 7.01 |
| Sample_T6C_k141_15713_fragment_1  | 10828 | 12 | 1 | 1  | Low-quality | 7.01 |
| Sample_C1B_k141_138202            | 5854  | 4  | 0 | 4  | Low-quality | 7    |
| Sample_C8C_k141_21573             | 5654  | 6  | 1 | 2  | Low-quality | 7    |
| Sample_T2B_k141_177257            | 5760  | 7  | 0 | 3  | Low-quality | 7    |
| Sample_T6A_k141_195259            | 13016 | 15 | 1 | 1  | Low-quality | 7    |
| Sample_C4B_k141_81483             | 9212  | 4  | 0 | 1  | Low-quality | 6.99 |
| Sample_C6A_k141_2522              | 6511  | 7  | 1 | 1  | Low-quality | 6.99 |
| Sample_C13B_k141_104154           | 5491  | 5  | 0 | 0  | Low-quality | 6.98 |
| Sample_T5A_k141_13165             | 5707  | 5  | 0 | 1  | Low-quality | 6.98 |
| Sample_T8C_k141_14603             | 5357  | 10 | 6 | 0  | Low-quality | 6.98 |
| Sample_C1B_k141_181242            | 12642 | 12 | 0 | 8  | Low-quality | 6.97 |
| Sample_T12C_k141_73335            | 7126  | 4  | 0 | 2  | Low-quality | 6.97 |

|                                   |       |    |   |   |             |      |
|-----------------------------------|-------|----|---|---|-------------|------|
| Sample_T18A_k141_167993           | 5778  | 1  | 0 | 0 | Low-quality | 6.97 |
| Sample_T2A_k141_148160            | 10126 | 12 | 0 | 8 | Low-quality | 6.97 |
| Sample_C11A_k141_146117           | 7698  | 10 | 1 | 1 | Low-quality | 6.96 |
| Sample_C12C_k141_4395             | 26772 | 30 | 5 | 3 | Low-quality | 6.96 |
| Sample_C2C_k141_173334_fragment_6 | 8593  | 10 | 1 | 2 | Low-quality | 6.96 |
| Sample_C3A_k141_235397            | 7592  | 12 | 5 | 1 | Low-quality | 6.96 |
| Sample_T15B_k141_84104            | 9009  | 8  | 1 | 2 | Low-quality | 6.96 |
| Sample_T18C_k141_43172_fragment_1 | 10868 | 10 | 1 | 2 | Low-quality | 6.96 |
| Sample_T2A_k141_61392             | 5692  | 11 | 0 | 2 | Low-quality | 6.96 |
| Sample_T4B_k141_144875            | 5051  | 11 | 3 | 0 | Low-quality | 6.96 |
| Sample_T7B_k141_34547             | 5332  | 6  | 0 | 1 | Low-quality | 6.96 |
| Sample_C11B_k141_20625            | 7259  | 6  | 0 | 1 | Low-quality | 6.95 |
| Sample_C2B_k141_336923            | 5736  | 5  | 2 | 0 | Low-quality | 6.95 |
| Sample_C3B_k141_82820             | 10346 | 11 | 1 | 1 | Low-quality | 6.95 |
| Sample_C4A_k141_18189             | 6437  | 12 | 2 | 0 | Low-quality | 6.95 |
| Sample_T2B_k141_264721            | 14565 | 14 | 5 | 1 | Low-quality | 6.95 |
| Sample_T4B_k141_313107            | 6237  | 6  | 1 | 0 | Low-quality | 6.95 |
| Sample_C12C_k141_164487           | 11172 | 14 | 1 | 0 | Low-quality | 6.94 |
| Sample_T2B_k141_142089            | 5680  | 7  | 1 | 0 | Low-quality | 6.94 |
| Sample_T4B_k141_136439            | 8450  | 11 | 0 | 0 | Low-quality | 6.94 |
| Sample_C10A_k141_23642            | 11738 | 13 | 7 | 0 | Low-quality | 6.94 |
| Sample_C1A_k141_257264            | 5562  | 8  | 0 | 0 | Low-quality | 6.94 |
| Sample_C3A_k141_159382            | 5357  | 4  | 3 | 0 | Low-quality | 6.94 |
| Sample_T12C_k141_17556            | 7754  | 12 | 1 | 1 | Low-quality | 6.94 |
| Sample_C13A_k141_78644            | 5806  | 3  | 0 | 1 | Low-quality | 6.93 |
| Sample_T12C_k141_85962            | 5387  | 14 | 1 | 1 | Low-quality | 6.93 |
| Sample_T5B_k141_34874             | 10876 | 10 | 1 | 3 | Low-quality | 6.93 |
| Sample_T6A_k141_282179            | 9045  | 13 | 0 | 0 | Low-quality | 6.92 |
| Sample_C10A_k141_231651           | 11205 | 10 | 1 | 1 | Low-quality | 6.92 |
| Sample_C4A_k141_49703             | 6866  | 8  | 3 | 0 | Low-quality | 6.92 |
| Sample_C5A_k141_270013_fragment_3 | 10301 | 19 | 1 | 0 | Low-quality | 6.92 |
| Sample_C8A_k141_165448            | 5427  | 3  | 0 | 1 | Low-quality | 6.91 |
| Sample_T6A_k141_23881             | 12496 | 19 | 1 | 0 | Low-quality | 6.91 |
| Sample_C3A_k141_55667             | 5903  | 9  | 4 | 0 | Low-quality | 6.91 |
| Sample_C4B_k141_137767            | 9985  | 10 | 0 | 1 | Low-quality | 6.9  |
| Sample_C8A_k141_134119            | 13201 | 10 | 1 | 8 | Low-quality | 6.9  |
| Sample_T10A_k141_117669           | 12720 | 15 | 1 | 1 | Low-quality | 6.9  |
| Sample_T3C_k141_58859             | 12218 | 15 | 1 | 3 | Low-quality | 6.9  |
| Sample_T12A_k141_109080           | 10965 | 13 | 1 | 2 | Low-quality | 6.89 |

|                         |       |    |   |    |             |      |
|-------------------------|-------|----|---|----|-------------|------|
| Sample_T12B_k141_25912  | 9582  | 13 | 0 | 0  | Low-quality | 6.88 |
| Sample_C5A_k141_36268   | 14917 | 36 | 7 | 0  | Low-quality | 6.88 |
| Sample_T12A_k141_61043  | 10942 | 17 | 4 | 1  | Low-quality | 6.88 |
| Sample_T4B_k141_90670   | 5252  | 6  | 1 | 0  | Low-quality | 6.88 |
| Sample_T5C_k141_49268   | 5537  | 6  | 0 | 1  | Low-quality | 6.88 |
| Sample_C1B_k141_256029  | 10919 | 8  | 0 | 4  | Low-quality | 6.87 |
| Sample_T15C_k141_9818   | 5909  | 10 | 1 | 2  | Low-quality | 6.87 |
| Sample_C2A_k141_79694   | 5413  | 8  | 3 | 1  | Low-quality | 6.86 |
| Sample_T10B_k141_118795 | 8758  | 5  | 0 | 0  | Low-quality | 6.86 |
| Sample_T11C_k141_147293 | 5180  | 8  | 1 | 0  | Low-quality | 6.86 |
| Sample_C9A_k141_99657   | 7384  | 6  | 0 | 1  | Low-quality | 6.86 |
| Sample_C2A_k141_232351  | 27122 | 38 | 2 | 13 | Low-quality | 6.84 |
| Sample_T17B_k141_26831  | 10175 | 13 | 1 | 1  | Low-quality | 6.84 |
| Sample_C14A_k141_48922  | 7069  | 13 | 0 | 5  | Low-quality | 6.83 |
| Sample_C9A_k141_100985  | 7381  | 4  | 0 | 2  | Low-quality | 6.83 |
| Sample_T4A_k141_89181   | 5569  | 8  | 2 | 0  | Low-quality | 6.83 |
| Sample_C9B_k141_56920   | 5064  | 11 | 3 | 0  | Low-quality | 6.82 |
| Sample_T15A_k141_153001 | 7550  | 6  | 0 | 1  | Low-quality | 6.82 |
| Sample_T8A_k141_194733  | 37368 | 29 | 1 | 23 | Low-quality | 6.82 |
| Sample_C10A_k141_51439  | 8102  | 10 | 1 | 2  | Low-quality | 6.82 |
| Sample_C5A_k141_191507  | 11850 | 22 | 1 | 0  | Low-quality | 6.81 |
| Sample_T13B_k141_132022 | 7449  | 6  | 1 | 2  | Low-quality | 6.81 |
| Sample_T2B_k141_60377   | 84662 | 43 | 1 | 36 | Low-quality | 6.81 |
| Sample_T3B_k141_15629   | 9919  | 9  | 0 | 7  | Low-quality | 6.81 |
| Sample_T18B_k141_53163  | 5604  | 4  | 2 | 0  | Low-quality | 6.81 |
| Sample_T4A_k141_34904   | 5635  | 1  | 0 | 0  | Low-quality | 6.8  |
| Sample_C4A_k141_148632  | 5225  | 7  | 2 | 0  | Low-quality | 6.8  |
| Sample_T6C_k141_58677   | 8702  | 15 | 0 | 1  | Low-quality | 6.8  |
| Sample_T3B_k141_32482   | 24225 | 28 | 1 | 5  | Low-quality | 6.79 |
| Sample_T7A_k141_107469  | 13420 | 20 | 5 | 0  | Low-quality | 6.79 |
| Sample_C14C_k141_121699 | 6397  | 10 | 4 | 2  | Low-quality | 6.79 |
| Sample_T14A_k141_217533 | 10089 | 13 | 1 | 3  | Low-quality | 6.78 |
| Sample_T15B_k141_8873   | 7054  | 7  | 0 | 2  | Low-quality | 6.78 |
| Sample_C10C_k141_6713   | 19754 | 24 | 0 | 15 | Low-quality | 6.77 |
| Sample_C2C_k141_2056    | 9161  | 8  | 0 | 6  | Low-quality | 6.77 |
| Sample_C9C_k141_42316   | 5645  | 6  | 0 | 1  | Low-quality | 6.77 |
| Sample_T11C_k141_21283  | 5439  | 5  | 0 | 2  | Low-quality | 6.77 |
| Sample_T4A_k141_88535   | 6467  | 7  | 0 | 0  | Low-quality | 6.77 |
| Sample_T6A_k141_252908  | 17164 | 15 | 0 | 9  | Low-quality | 6.77 |

|                         |       |    |   |    |             |      |
|-------------------------|-------|----|---|----|-------------|------|
| Sample_T12A_k141_161993 | 5429  | 9  | 2 | 0  | Low-quality | 6.77 |
| Sample_C8B_k141_159568  | 6740  | 3  | 1 | 0  | Low-quality | 6.76 |
| Sample_T5C_k141_9333    | 7594  | 10 | 0 | 2  | Low-quality | 6.76 |
| Sample_C11A_k141_170200 | 5557  | 4  | 0 | 0  | Low-quality | 6.75 |
| Sample_C13A_k141_47160  | 13173 | 12 | 0 | 7  | Low-quality | 6.75 |
| Sample_C3B_k141_72612   | 7803  | 4  | 1 | 0  | Low-quality | 6.75 |
| Sample_C6C_k141_44926   | 7563  | 8  | 0 | 5  | Low-quality | 6.75 |
| Sample_T12C_k141_96525  | 6804  | 19 | 0 | 0  | Low-quality | 6.75 |
| Sample_T14B_k141_180151 | 7328  | 8  | 0 | 3  | Low-quality | 6.75 |
| Sample_T2A_k141_256867  | 38229 | 39 | 1 | 23 | Low-quality | 6.75 |
| Sample_T2C_k141_29716   | 11561 | 17 | 2 | 1  | Low-quality | 6.75 |
| Sample_T8B_k141_11305   | 26655 | 33 | 0 | 18 | Low-quality | 6.75 |
| Sample_C11B_k141_115085 | 7006  | 10 | 1 | 0  | Low-quality | 6.75 |
| Sample_C8A_k141_139368  | 18966 | 17 | 1 | 0  | Low-quality | 6.75 |
| Sample_C8B_k141_72340   | 7358  | 4  | 0 | 2  | Low-quality | 6.74 |
| Sample_T12B_k141_88081  | 7785  | 7  | 0 | 2  | Low-quality | 6.74 |
| Sample_T5B_k141_59186   | 7076  | 8  | 0 | 1  | Low-quality | 6.74 |
| Sample_T5C_k141_167382  | 25186 | 21 | 0 | 12 | Low-quality | 6.74 |
| Sample_C5A_k141_115592  | 6962  | 6  | 0 | 1  | Low-quality | 6.74 |
| Sample_C10C_k141_217421 | 13719 | 16 | 1 | 2  | Low-quality | 6.73 |
| Sample_T15C_k141_84184  | 6132  | 4  | 0 | 1  | Low-quality | 6.73 |
| Sample_C10A_k141_132397 | 5632  | 6  | 1 | 0  | Low-quality | 6.73 |
| Sample_C11B_k141_192238 | 6527  | 14 | 3 | 0  | Low-quality | 6.73 |
| Sample_C7B_k141_80302   | 7948  | 13 | 2 | 0  | Low-quality | 6.73 |
| Sample_T16A_k141_42085  | 11011 | 10 | 1 | 0  | Low-quality | 6.73 |
| Sample_T17B_k141_26354  | 7453  | 8  | 0 | 1  | Low-quality | 6.73 |
| Sample_T15B_k141_140925 | 7191  | 1  | 1 | 0  | Low-quality | 6.72 |
| Sample_C14C_k141_130046 | 8977  | 11 | 1 | 0  | Low-quality | 6.72 |
| Sample_T12C_k141_67882  | 11700 | 13 | 2 | 0  | Low-quality | 6.72 |
| Sample_T14B_k141_142070 | 7077  | 6  | 0 | 0  | Low-quality | 6.72 |
| Sample_T7A_k141_124597  | 7407  | 8  | 2 | 0  | Low-quality | 6.72 |
| Sample_T13B_k141_132893 | 5419  | 8  | 1 | 3  | Low-quality | 6.71 |
| Sample_T15A_k141_80063  | 9746  | 12 | 2 | 3  | Low-quality | 6.71 |
| Sample_T1C_k141_4051    | 5673  | 4  | 0 | 1  | Low-quality | 6.71 |
| Sample_T3B_k141_99348   | 7387  | 11 | 8 | 2  | Low-quality | 6.71 |
| Sample_T12A_k141_334885 | 9938  | 11 | 2 | 3  | Low-quality | 6.7  |
| Sample_T2B_k141_103479  | 8847  | 9  | 0 | 0  | Low-quality | 6.69 |
| Sample_C10C_k141_39041  | 6786  | 8  | 0 | 3  | Low-quality | 6.68 |
| Sample_T10C_k141_27680  | 7176  | 9  | 0 | 3  | Low-quality | 6.68 |

|                         |       |    |   |   |             |      |
|-------------------------|-------|----|---|---|-------------|------|
| Sample_T11B_k141_126622 | 11658 | 10 | 0 | 7 | Low-quality | 6.68 |
| Sample_T12B_k141_100889 | 9934  | 12 | 1 | 2 | Low-quality | 6.68 |
| Sample_C1B_k141_8784    | 9825  | 15 | 0 | 0 | Low-quality | 6.68 |
| Sample_C4A_k141_178607  | 5195  | 9  | 3 | 3 | Low-quality | 6.68 |
| Sample_T6A_k141_223501  | 13224 | 10 | 1 | 1 | Low-quality | 6.68 |
| Sample_C1C_k141_190484  | 7020  | 10 | 0 | 3 | Low-quality | 6.67 |
| Sample_C3A_k141_152461  | 8357  | 7  | 0 | 0 | Low-quality | 6.67 |
| Sample_C6A_k141_31762   | 6262  | 9  | 0 | 3 | Low-quality | 6.67 |
| Sample_T15B_k141_91904  | 7518  | 9  | 0 | 2 | Low-quality | 6.67 |
| Sample_C6B_k141_94056   | 12405 | 11 | 1 | 2 | Low-quality | 6.67 |
| Sample_C12C_k141_205011 | 12284 | 18 | 1 | 1 | Low-quality | 6.66 |
| Sample_C11B_k141_102591 | 6914  | 11 | 5 | 0 | Low-quality | 6.66 |
| Sample_C14C_k141_152807 | 9904  | 21 | 1 | 1 | Low-quality | 6.66 |
| Sample_T2C_k141_213065  | 7545  | 10 | 3 | 1 | Low-quality | 6.66 |
| Sample_C12B_k141_224    | 7463  | 6  | 0 | 2 | Low-quality | 6.65 |
| Sample_C7B_k141_82055   | 6254  | 3  | 1 | 0 | Low-quality | 6.65 |
| Sample_T11B_k141_117208 | 9286  | 7  | 0 | 5 | Low-quality | 6.65 |
| Sample_T12A_k141_175946 | 5431  | 5  | 0 | 2 | Low-quality | 6.65 |
| Sample_T8B_k141_159869  | 6449  | 12 | 3 | 0 | Low-quality | 6.65 |
| Sample_C13A_k141_46634  | 9732  | 15 | 2 | 2 | Low-quality | 6.64 |
| Sample_T6A_k141_126695  | 15758 | 12 | 0 | 8 | Low-quality | 6.64 |
| Sample_T6A_k141_181894  | 7771  | 8  | 1 | 1 | Low-quality | 6.64 |
| Sample_C4B_k141_189510  | 11082 | 12 | 1 | 0 | Low-quality | 6.64 |
| Sample_C13B_k141_102254 | 5458  | 8  | 0 | 1 | Low-quality | 6.63 |
| Sample_T11C_k141_91302  | 5758  | 3  | 2 | 0 | Low-quality | 6.63 |
| Sample_T15C_k141_64917  | 6818  | 8  | 0 | 2 | Low-quality | 6.63 |
| Sample_T2B_k141_47040   | 8168  | 14 | 1 | 0 | Low-quality | 6.63 |
| Sample_T6A_k141_275421  | 11990 | 20 | 0 | 1 | Low-quality | 6.63 |
| Sample_C2C_k141_96791   | 5043  | 11 | 0 | 0 | Low-quality | 6.63 |
| Sample_T12B_k141_113679 | 5175  | 9  | 1 | 0 | Low-quality | 6.63 |
| Sample_C4B_k141_132263  | 5280  | 7  | 0 | 5 | Low-quality | 6.62 |
| Sample_C9A_k141_68844   | 5003  | 5  | 0 | 0 | Low-quality | 6.62 |
| Sample_T12C_k141_31355  | 5241  | 10 | 2 | 0 | Low-quality | 6.62 |
| Sample_T2C_k141_168371  | 10375 | 19 | 1 | 1 | Low-quality | 6.62 |
| Sample_C1B_k141_87521   | 5949  | 10 | 1 | 1 | Low-quality | 6.61 |
| Sample_C13A_k141_19287  | 5720  | 10 | 0 | 0 | Low-quality | 6.61 |
| Sample_T15A_k141_135509 | 7176  | 6  | 0 | 2 | Low-quality | 6.61 |
| Sample_C10C_k141_230038 | 10687 | 13 | 1 | 1 | Low-quality | 6.6  |
| Sample_T16B_k141_53309  | 5485  | 7  | 0 | 1 | Low-quality | 6.6  |

|                                  |        |    |   |    |             |      |
|----------------------------------|--------|----|---|----|-------------|------|
| Sample_T10A_k141_113537          | 11416  | 15 | 8 | 0  | Low-quality | 6.6  |
| Sample_C14A_k141_106030          | 6364   | 7  | 1 | 1  | Low-quality | 6.59 |
| Sample_C14A_k141_215538          | 12560  | 18 | 2 | 3  | Low-quality | 6.59 |
| Sample_C9A_k141_36588            | 6781   | 7  | 0 | 1  | Low-quality | 6.59 |
| Sample_T14A_k141_191733          | 5425   | 5  | 3 | 0  | Low-quality | 6.59 |
| Sample_C10A_k141_275423          | 9795   | 9  | 1 | 2  | Low-quality | 6.58 |
| Sample_C10B_k141_67266           | 6666   | 7  | 0 | 3  | Low-quality | 6.58 |
| Sample_C1C_k141_62396            | 103781 | 91 | 1 | 45 | Low-quality | 6.58 |
| Sample_C2A_k141_200085           | 7269   | 6  | 0 | 3  | Low-quality | 6.58 |
| Sample_C2B_k141_217137           | 8490   | 4  | 0 | 2  | Low-quality | 6.58 |
| Sample_T12A_k141_221962          | 6609   | 8  | 0 | 2  | Low-quality | 6.58 |
| Sample_T16B_k141_54670           | 5381   | 5  | 0 | 4  | Low-quality | 6.58 |
| Sample_C9A_k141_67744_fragment_1 | 13304  | 8  | 3 | 2  | Low-quality | 6.58 |
| Sample_T13B_k141_128053          | 7243   | 9  | 1 | 0  | Low-quality | 6.58 |
| Sample_T15A_k141_104342          | 8281   | 10 | 1 | 0  | Low-quality | 6.58 |
| Sample_T8B_k141_164901           | 9837   | 8  | 0 | 0  | Low-quality | 6.58 |
| Sample_C10C_k141_219250          | 33066  | 23 | 2 | 4  | Low-quality | 6.57 |
| Sample_C1C_k141_157524           | 6753   | 5  | 0 | 5  | Low-quality | 6.57 |
| Sample_T2B_k141_114544           | 18336  | 15 | 1 | 7  | Low-quality | 6.57 |
| Sample_T3A_k141_102706           | 5361   | 11 | 0 | 0  | Low-quality | 6.57 |
| Sample_T4B_k141_21477            | 6222   | 3  | 0 | 2  | Low-quality | 6.57 |
| Sample_T5C_k141_42773            | 8817   | 9  | 0 | 6  | Low-quality | 6.57 |
| Sample_C1B_k141_113448           | 14236  | 10 | 0 | 8  | Low-quality | 6.56 |
| Sample_C2B_k141_255689           | 5329   | 6  | 0 | 1  | Low-quality | 6.56 |
| Sample_C4C_k141_221817           | 9473   | 8  | 0 | 4  | Low-quality | 6.56 |
| Sample_T2C_k141_256233           | 5144   | 6  | 1 | 1  | Low-quality | 6.56 |
| Sample_C2A_k141_180698           | 5746   | 10 | 0 | 1  | Low-quality | 6.56 |
| Sample_C6C_k141_39201            | 11436  | 13 | 0 | 12 | Low-quality | 6.55 |
| Sample_T11C_k141_22069           | 10274  | 15 | 1 | 2  | Low-quality | 6.55 |
| Sample_T4C_k141_52161            | 13277  | 11 | 0 | 10 | Low-quality | 6.54 |
| Sample_T11C_k141_78280           | 5389   | 6  | 1 | 0  | Low-quality | 6.54 |
| Sample_T16A_k141_10778           | 5683   | 8  | 1 | 0  | Low-quality | 6.54 |
| Sample_C11A_k141_51126           | 5196   | 4  | 0 | 4  | Low-quality | 6.53 |
| Sample_C9B_k141_95167            | 35778  | 27 | 1 | 19 | Low-quality | 6.53 |
| Sample_C10A_k141_35429           | 6250   | 7  | 3 | 1  | Low-quality | 6.53 |
| Sample_T10A_k141_7907            | 10688  | 21 | 1 | 0  | Low-quality | 6.53 |
| Sample_C10A_k141_288974          | 7088   | 3  | 0 | 1  | Low-quality | 6.52 |
| Sample_C13B_k141_17030           | 6280   | 7  | 1 | 2  | Low-quality | 6.52 |
| Sample_C1C_k141_44626            | 7239   | 7  | 0 | 5  | Low-quality | 6.52 |



|                                   |       |    |   |    |             |      |
|-----------------------------------|-------|----|---|----|-------------|------|
| Sample_C10C_k141_185438           | 10323 | 12 | 1 | 1  | Low-quality | 6.51 |
| Sample_C3A_k141_34460             | 5311  | 13 | 2 | 0  | Low-quality | 6.51 |
| Sample_C8C_k141_104241            | 8667  | 10 | 4 | 0  | Low-quality | 6.51 |
| Sample_T3C_k141_88389_fragment_1  | 23010 | 25 | 3 | 8  | Low-quality | 6.51 |
| Sample_C11B_k141_177837           | 5311  | 5  | 0 | 2  | Low-quality | 6.5  |
| Sample_C1C_k141_142261            | 10706 | 12 | 1 | 3  | Low-quality | 6.5  |
| Sample_C2A_k141_170442            | 5516  | 3  | 0 | 0  | Low-quality | 6.5  |
| Sample_C2A_k141_163017            | 11243 | 12 | 0 | 4  | Low-quality | 6.5  |
| Sample_C8B_k141_73150             | 13129 | 15 | 0 | 11 | Low-quality | 6.5  |
| Sample_T2A_k141_132288            | 5183  | 8  | 0 | 5  | Low-quality | 6.5  |
| Sample_C6C_k141_96341             | 11844 | 15 | 2 | 0  | Low-quality | 6.5  |
| Sample_T12A_k141_147203           | 5277  | 11 | 1 | 0  | Low-quality | 6.5  |
| Sample_T2C_k141_209992_fragment_1 | 5516  | 8  | 2 | 1  | Low-quality | 6.5  |
| Sample_C5A_k141_267066            | 10998 | 8  | 0 | 3  | Low-quality | 6.49 |
| Sample_C8B_k141_85651             | 5969  | 6  | 0 | 1  | Low-quality | 6.49 |
| Sample_T16B_k141_588              | 11328 | 10 | 0 | 7  | Low-quality | 6.49 |
| Sample_T4A_k141_88325             | 15219 | 16 | 0 | 11 | Low-quality | 6.49 |
| Sample_C13B_k141_9273             | 22821 | 28 | 1 | 0  | Low-quality | 6.49 |
| Sample_C2A_k141_130670            | 6356  | 9  | 0 | 2  | Low-quality | 6.48 |
| Sample_C4B_k141_55259             | 7342  | 10 | 0 | 1  | Low-quality | 6.48 |
| Sample_T3C_k141_92659             | 10316 | 16 | 1 | 3  | Low-quality | 6.48 |
| Sample_T5C_k141_22533             | 80333 | 73 | 1 | 25 | Low-quality | 6.48 |
| Sample_T12A_k141_26845            | 6339  | 7  | 0 | 0  | Low-quality | 6.48 |
| Sample_C6B_k141_48144             | 8533  | 10 | 3 | 4  | Low-quality | 6.46 |
| Sample_C6A_k141_203777            | 8913  | 7  | 2 | 0  | Low-quality | 6.46 |
| Sample_C11C_k141_68428            | 6022  | 7  | 1 | 1  | Low-quality | 6.45 |
| Sample_T1C_k141_66419             | 12408 | 15 | 0 | 9  | Low-quality | 6.45 |
| Sample_C10A_k141_125906           | 12143 | 8  | 0 | 7  | Low-quality | 6.44 |
| Sample_T11A_k141_51679            | 9144  | 6  | 0 | 3  | Low-quality | 6.44 |
| Sample_T4A_k141_113682            | 8411  | 6  | 0 | 4  | Low-quality | 6.44 |
| Sample_C2A_k141_121824            | 6961  | 6  | 0 | 2  | Low-quality | 6.43 |
| Sample_C4B_k141_94901             | 8040  | 7  | 0 | 7  | Low-quality | 6.43 |
| Sample_C4B_k141_130269            | 5402  | 5  | 1 | 0  | Low-quality | 6.43 |
| Sample_C5A_k141_124454            | 6343  | 3  | 0 | 1  | Low-quality | 6.43 |
| Sample_T11C_k141_79037            | 5876  | 5  | 0 | 1  | Low-quality | 6.43 |
| Sample_T6C_k141_220494            | 5095  | 2  | 0 | 0  | Low-quality | 6.42 |
| Sample_T6C_k141_88902             | 11479 | 11 | 0 | 10 | Low-quality | 6.42 |
| Sample_C2B_k141_165686            | 5795  | 4  | 3 | 0  | Low-quality | 6.42 |
| Sample_C1C_k141_52253             | 11186 | 8  | 0 | 6  | Low-quality | 6.41 |

|                                   |       |    |   |    |             |      |
|-----------------------------------|-------|----|---|----|-------------|------|
| Sample_T2B_k141_318367            | 10980 | 10 | 1 | 1  | Low-quality | 6.41 |
| Sample_T6C_k141_19294             | 6455  | 4  | 0 | 2  | Low-quality | 6.41 |
| Sample_C3A_k141_47200             | 12418 | 20 | 1 | 1  | Low-quality | 6.41 |
| Sample_T10B_k141_185420           | 5046  | 9  | 3 | 0  | Low-quality | 6.41 |
| Sample_T13C_k141_105911           | 13900 | 9  | 0 | 7  | Low-quality | 6.4  |
| Sample_T6B_k141_17612             | 11718 | 20 | 2 | 0  | Low-quality | 6.4  |
| Sample_C1A_k141_117973            | 5285  | 10 | 3 | 0  | Low-quality | 6.4  |
| Sample_C4C_k141_107080            | 5244  | 6  | 0 | 1  | Low-quality | 6.39 |
| Sample_T2A_k141_35570             | 7164  | 7  | 2 | 0  | Low-quality | 6.39 |
| Sample_T8C_k141_77304_fragment_3  | 6596  | 9  | 3 | 0  | Low-quality | 6.39 |
| Sample_T8C_k141_66708_fragment_1  | 13639 | 17 | 3 | 0  | Low-quality | 6.39 |
| Sample_C7A_k141_17461             | 9828  | 10 | 1 | 1  | Low-quality | 6.38 |
| Sample_T11A_k141_61940            | 6062  | 5  | 0 | 2  | Low-quality | 6.38 |
| Sample_T12A_k141_279094           | 5718  | 8  | 0 | 3  | Low-quality | 6.38 |
| Sample_T12B_k141_14037            | 9968  | 19 | 1 | 0  | Low-quality | 6.38 |
| Sample_T7B_k141_32539             | 5627  | 8  | 0 | 0  | Low-quality | 6.38 |
| Sample_C7A_k141_128476            | 9059  | 6  | 0 | 4  | Low-quality | 6.37 |
| Sample_T13A_k141_587              | 8501  | 7  | 0 | 4  | Low-quality | 6.37 |
| Sample_T17B_k141_36719            | 8399  | 7  | 1 | 0  | Low-quality | 6.37 |
| Sample_T6C_k141_210287            | 11118 | 11 | 0 | 8  | Low-quality | 6.37 |
| Sample_T6B_k141_398               | 8684  | 18 | 3 | 2  | Low-quality | 6.37 |
| Sample_C10A_k141_137735           | 13184 | 12 | 0 | 7  | Low-quality | 6.36 |
| Sample_C6B_k141_176984            | 11110 | 12 | 0 | 11 | Low-quality | 6.36 |
| Sample_C11B_k141_9298             | 6604  | 13 | 4 | 0  | Low-quality | 6.36 |
| Sample_T10B_k141_92357_fragment_1 | 11823 | 18 | 1 | 4  | Low-quality | 6.36 |
| Sample_C6B_k141_124950            | 12385 | 14 | 0 | 12 | Low-quality | 6.35 |
| Sample_C6C_k141_210220            | 7899  | 9  | 0 | 5  | Low-quality | 6.35 |
| Sample_T4B_k141_312618            | 5142  | 6  | 0 | 1  | Low-quality | 6.35 |
| Sample_T8C_k141_41560             | 5169  | 10 | 3 | 0  | Low-quality | 6.35 |
| Sample_C11B_k141_13839            | 6756  | 4  | 0 | 0  | Low-quality | 6.34 |
| Sample_C1B_k141_29464             | 11413 | 14 | 0 | 6  | Low-quality | 6.34 |
| Sample_T12B_k141_88953            | 8776  | 21 | 0 | 1  | Low-quality | 6.34 |
| Sample_T4B_k141_229710            | 16293 | 13 | 2 | 3  | Low-quality | 6.34 |
| Sample_T10A_k141_81928            | 5911  | 12 | 0 | 0  | Low-quality | 6.34 |
| Sample_T5A_k141_50981             | 5972  | 8  | 5 | 0  | Low-quality | 6.34 |
| Sample_C1B_k141_72928             | 6867  | 6  | 0 | 1  | Low-quality | 6.33 |
| Sample_C2C_k141_191719            | 5481  | 6  | 1 | 0  | Low-quality | 6.33 |
| Sample_C4C_k141_140024            | 5316  | 10 | 1 | 0  | Low-quality | 6.33 |
| Sample_T13C_k141_28080            | 9778  | 21 | 1 | 1  | Low-quality | 6.33 |

|                                  |       |    |   |    |             |      |
|----------------------------------|-------|----|---|----|-------------|------|
| Sample_T1A_k141_29226            | 5504  | 10 | 1 | 0  | Low-quality | 6.33 |
| Sample_T14C_k141_150497          | 5163  | 6  | 0 | 1  | Low-quality | 6.32 |
| Sample_T2C_k141_99493            | 9151  | 4  | 1 | 0  | Low-quality | 6.32 |
| Sample_T8B_k141_232599           | 5167  | 7  | 0 | 4  | Low-quality | 6.32 |
| Sample_C4C_k141_120851           | 8750  | 8  | 1 | 1  | Low-quality | 6.32 |
| Sample_C12A_k141_94139           | 13595 | 17 | 1 | 3  | Low-quality | 6.31 |
| Sample_C13B_k141_38612           | 5156  | 6  | 0 | 2  | Low-quality | 6.31 |
| Sample_C8A_k141_57548            | 6585  | 8  | 0 | 1  | Low-quality | 6.31 |
| Sample_T16A_k141_100048          | 5972  | 4  | 0 | 3  | Low-quality | 6.31 |
| Sample_T7A_k141_159995           | 6828  | 4  | 0 | 0  | Low-quality | 6.31 |
| Sample_T7B_k141_42039            | 6196  | 13 | 0 | 0  | Low-quality | 6.31 |
| Sample_T17C_k141_17232           | 7353  | 10 | 1 | 1  | Low-quality | 6.31 |
| Sample_T10B_k141_85435           | 11000 | 8  | 0 | 7  | Low-quality | 6.3  |
| Sample_C13B_k141_95070           | 9890  | 17 | 2 | 3  | Low-quality | 6.3  |
| Sample_C13B_k141_79811           | 11534 | 12 | 1 | 1  | Low-quality | 6.3  |
| Sample_C2C_k141_268223           | 6928  | 8  | 2 | 1  | Low-quality | 6.3  |
| Sample_C4B_k141_233372           | 5771  | 13 | 2 | 0  | Low-quality | 6.3  |
| Sample_T6A_k141_287364           | 5717  | 8  | 1 | 0  | Low-quality | 6.3  |
| Sample_T17A_k141_1503            | 11597 | 19 | 1 | 1  | Low-quality | 6.29 |
| Sample_T5C_k141_191772           | 7354  | 6  | 0 | 0  | Low-quality | 6.29 |
| Sample_C5A_k141_249981           | 6637  | 6  | 0 | 1  | Low-quality | 6.29 |
| Sample_T12A_k141_332037          | 6317  | 9  | 2 | 0  | Low-quality | 6.29 |
| Sample_T4B_k141_99501            | 5800  | 9  | 3 | 0  | Low-quality | 6.29 |
| Sample_C3B_k141_167758           | 5539  | 5  | 1 | 3  | Low-quality | 6.28 |
| Sample_C4A_k141_201955           | 7171  | 7  | 0 | 3  | Low-quality | 6.28 |
| Sample_C9A_k141_126315           | 8075  | 12 | 8 | 2  | Low-quality | 6.28 |
| Sample_T2C_k141_257120           | 6813  | 16 | 0 | 0  | Low-quality | 6.28 |
| Sample_T12C_k141_34644           | 77967 | 70 | 1 | 49 | Low-quality | 6.27 |
| Sample_T7C_k141_37289            | 6051  | 7  | 0 | 0  | Low-quality | 6.27 |
| Sample_C10B_k141_74730           | 9097  | 7  | 0 | 7  | Low-quality | 6.26 |
| Sample_C3B_k141_90408            | 12849 | 8  | 1 | 7  | Low-quality | 6.26 |
| Sample_T14A_k141_69567           | 12479 | 18 | 2 | 4  | Low-quality | 6.26 |
| Sample_C11B_k141_229644          | 7752  | 8  | 0 | 3  | Low-quality | 6.26 |
| Sample_T2B_k141_185497           | 8908  | 10 | 2 | 0  | Low-quality | 6.26 |
| Sample_C5A_k141_58642            | 10905 | 12 | 0 | 10 | Low-quality | 6.25 |
| Sample_T8B_k141_198806           | 7288  | 6  | 0 | 6  | Low-quality | 6.25 |
| Sample_C10A_k141_244689          | 6185  | 6  | 0 | 1  | Low-quality | 6.25 |
| Sample_T5A_k141_13676_fragment_1 | 9048  | 11 | 1 | 2  | Low-quality | 6.25 |
| Sample_C11B_k141_240360          | 6787  | 6  | 0 | 1  | Low-quality | 6.24 |

|                                    |       |    |   |    |             |      |
|------------------------------------|-------|----|---|----|-------------|------|
| Sample_T11B_k141_58768             | 5415  | 3  | 2 | 0  | Low-quality | 6.24 |
| Sample_T12A_k141_145491            | 11300 | 9  | 0 | 5  | Low-quality | 6.24 |
| Sample_T15B_k141_76912             | 6061  | 4  | 1 | 0  | Low-quality | 6.24 |
| Sample_T15A_k141_149440            | 9929  | 13 | 0 | 0  | Low-quality | 6.24 |
| Sample_T5B_k141_25775_fragment_1   | 6690  | 8  | 1 | 1  | Low-quality | 6.24 |
| Sample_C11A_k141_151367            | 5093  | 6  | 0 | 5  | Low-quality | 6.23 |
| Sample_T15B_k141_66621             | 9622  | 13 | 1 | 2  | Low-quality | 6.23 |
| Sample_C1C_k141_34463              | 13162 | 6  | 1 | 5  | Low-quality | 6.22 |
| Sample_C5C_k141_75603              | 5940  | 4  | 0 | 0  | Low-quality | 6.22 |
| Sample_C11B_k141_183091            | 8199  | 7  | 0 | 5  | Low-quality | 6.21 |
| Sample_C14C_k141_19193             | 5979  | 6  | 1 | 2  | Low-quality | 6.21 |
| Sample_C7B_k141_71739              | 7331  | 13 | 0 | 0  | Low-quality | 6.21 |
| Sample_C8B_k141_64155              | 5587  | 4  | 0 | 0  | Low-quality | 6.21 |
| Sample_T14B_k141_174776            | 10834 | 10 | 0 | 8  | Low-quality | 6.21 |
| Sample_T16B_k141_73809             | 6668  | 7  | 0 | 2  | Low-quality | 6.21 |
| Sample_T2A_k141_142353             | 5410  | 1  | 0 | 0  | Low-quality | 6.21 |
| Sample_T8C_k141_115326             | 5620  | 2  | 0 | 0  | Low-quality | 6.21 |
| Sample_C14C_k141_2328              | 9258  | 8  | 0 | 5  | Low-quality | 6.2  |
| Sample_C2A_k141_96958              | 5076  | 6  | 0 | 1  | Low-quality | 6.2  |
| Sample_C4C_k141_133468             | 6452  | 17 | 1 | 1  | Low-quality | 6.2  |
| Sample_T2B_k141_26673              | 10804 | 11 | 1 | 0  | Low-quality | 6.2  |
| Sample_C14A_k141_192406            | 6060  | 4  | 0 | 2  | Low-quality | 6.19 |
| Sample_C2A_k141_174544             | 28842 | 23 | 1 | 6  | Low-quality | 6.19 |
| Sample_C3A_k141_202157             | 6693  | 5  | 0 | 2  | Low-quality | 6.19 |
| Sample_T7C_k141_70918              | 7325  | 9  | 0 | 2  | Low-quality | 6.19 |
| Sample_C13C_k141_99277             | 10499 | 24 | 1 | 2  | Low-quality | 6.19 |
| Sample_C2C_k141_175511             | 6547  | 11 | 8 | 0  | Low-quality | 6.19 |
| Sample_T8B_k141_221528             | 10170 | 15 | 1 | 2  | Low-quality | 6.19 |
| Sample_C12B_k141_181024            | 9283  | 9  | 0 | 6  | Low-quality | 6.18 |
| Sample_C14C_k141_99224             | 12226 | 14 | 0 | 7  | Low-quality | 6.18 |
| Sample_C4A_k141_45912              | 6513  | 5  | 0 | 4  | Low-quality | 6.18 |
| Sample_C5A_k141_290048             | 10789 | 10 | 0 | 7  | Low-quality | 6.18 |
| Sample_C7C_k141_8699               | 10636 | 12 | 2 | 0  | Low-quality | 6.18 |
| Sample_C9A_k141_94711              | 5002  | 10 | 3 | 1  | Low-quality | 6.18 |
| Sample_C2C_k141_262535             | 38400 | 38 | 0 | 26 | Low-quality | 6.17 |
| Sample_T14B_k141_159228            | 5671  | 9  | 0 | 0  | Low-quality | 6.17 |
| Sample_T12B_k141_127068            | 10114 | 24 | 1 | 1  | Low-quality | 6.17 |
| Sample_T14A_k141_117960_fragment_2 | 8589  | 10 | 1 | 1  | Low-quality | 6.17 |
| Sample_T18B_k141_124637            | 5081  | 12 | 5 | 0  | Low-quality | 6.17 |

|                                   |       |    |   |    |             |      |
|-----------------------------------|-------|----|---|----|-------------|------|
| Sample_T7A_k141_65287             | 6793  | 8  | 0 | 0  | Low-quality | 6.17 |
| Sample_C13A_k141_71510            | 7118  | 4  | 1 | 0  | Low-quality | 6.16 |
| Sample_C6B_k141_95572             | 12746 | 12 | 0 | 11 | Low-quality | 6.16 |
| Sample_C9C_k141_73102             | 10831 | 13 | 3 | 0  | Low-quality | 6.16 |
| Sample_C12C_k141_239813           | 9652  | 20 | 1 | 0  | Low-quality | 6.15 |
| Sample_C9B_k141_108077            | 5912  | 10 | 5 | 0  | Low-quality | 6.15 |
| Sample_C14C_k141_82553            | 15025 | 14 | 0 | 13 | Low-quality | 6.14 |
| Sample_C1C_k141_104806            | 5919  | 5  | 0 | 1  | Low-quality | 6.14 |
| Sample_C1C_k141_149246            | 7786  | 9  | 2 | 1  | Low-quality | 6.14 |
| Sample_C4B_k141_143864            | 5334  | 3  | 2 | 0  | Low-quality | 6.14 |
| Sample_T13C_k141_98234_fragment_1 | 17258 | 20 | 2 | 3  | Low-quality | 6.14 |
| Sample_C3C_k141_111631            | 5652  | 4  | 0 | 3  | Low-quality | 6.13 |
| Sample_C4B_k141_263786            | 7083  | 4  | 1 | 0  | Low-quality | 6.13 |
| Sample_T6A_k141_282385            | 63163 | 44 | 2 | 22 | Low-quality | 6.13 |
| Sample_T15C_k141_58649            | 5776  | 5  | 0 | 0  | Low-quality | 6.12 |
| Sample_T8A_k141_128874            | 11134 | 11 | 0 | 6  | Low-quality | 6.12 |
| Sample_T8B_k141_253335            | 6223  | 9  | 0 | 4  | Low-quality | 6.12 |
| Sample_C7A_k141_103978            | 5038  | 8  | 1 | 1  | Low-quality | 6.12 |
| Sample_T10A_k141_58072            | 5099  | 10 | 1 | 0  | Low-quality | 6.12 |
| Sample_C14C_k141_10373            | 5090  | 11 | 0 | 0  | Low-quality | 6.11 |
| Sample_C5A_k141_92118             | 13161 | 27 | 0 | 0  | Low-quality | 6.11 |
| Sample_C5A_k141_15628             | 6141  | 2  | 0 | 0  | Low-quality | 6.11 |
| Sample_C6A_k141_212089            | 6265  | 5  | 1 | 0  | Low-quality | 6.11 |
| Sample_C5A_k141_39464             | 8417  | 8  | 2 | 0  | Low-quality | 6.11 |
| Sample_T8A_k141_201176            | 19073 | 25 | 3 | 3  | Low-quality | 6.11 |
| Sample_T18A_k141_124155           | 10350 | 13 | 1 | 1  | Low-quality | 6.1  |
| Sample_C4A_k141_115866            | 10551 | 15 | 5 | 1  | Low-quality | 6.1  |
| Sample_T7B_k141_150153            | 8794  | 10 | 1 | 1  | Low-quality | 6.1  |
| Sample_C8B_k141_88620             | 10039 | 8  | 0 | 5  | Low-quality | 6.09 |
| Sample_T2C_k141_66801             | 9740  | 17 | 2 | 1  | Low-quality | 6.09 |
| Sample_T3A_k141_53421             | 5142  | 8  | 0 | 2  | Low-quality | 6.09 |
| Sample_C14B_k141_35211            | 5977  | 7  | 0 | 0  | Low-quality | 6.09 |
| Sample_C2B_k141_5737              | 5885  | 7  | 0 | 2  | Low-quality | 6.09 |
| Sample_T14A_k141_140233           | 9548  | 7  | 1 | 3  | Low-quality | 6.08 |
| Sample_C5A_k141_39500             | 8389  | 7  | 2 | 0  | Low-quality | 6.08 |
| Sample_T10A_k141_62288            | 11074 | 7  | 0 | 1  | Low-quality | 6.08 |
| Sample_C11A_k141_179996           | 13168 | 7  | 0 | 4  | Low-quality | 6.07 |
| Sample_C2C_k141_33618             | 6711  | 9  | 1 | 1  | Low-quality | 6.07 |
| Sample_T14A_k141_149074           | 12151 | 11 | 1 | 9  | Low-quality | 6.07 |

|                                   |       |    |   |    |             |      |
|-----------------------------------|-------|----|---|----|-------------|------|
| Sample_T2B_k141_13023             | 10727 | 11 | 0 | 4  | Low-quality | 6.07 |
| Sample_T12A_k141_83286_fragment_1 | 9823  | 10 | 1 | 0  | Low-quality | 6.07 |
| Sample_T13A_k141_113285           | 8228  | 11 | 2 | 0  | Low-quality | 6.07 |
| Sample_C7B_k141_150332            | 9364  | 13 | 1 | 2  | Low-quality | 6.06 |
| Sample_T12C_k141_157507           | 6540  | 6  | 0 | 2  | Low-quality | 6.05 |
| Sample_T6A_k141_7255              | 6522  | 6  | 0 | 1  | Low-quality | 6.05 |
| Sample_T5B_k141_5727_fragment_1   | 5094  | 9  | 4 | 2  | Low-quality | 6.05 |
| Sample_C7B_k141_6395              | 6182  | 7  | 0 | 1  | Low-quality | 6.04 |
| Sample_T13B_k141_110511           | 19742 | 21 | 2 | 5  | Low-quality | 6.04 |
| Sample_T12A_k141_16471            | 18087 | 18 | 0 | 7  | Low-quality | 6.03 |
| Sample_T2A_k141_168032            | 8646  | 4  | 0 | 0  | Low-quality | 6.03 |
| Sample_C7C_k141_78560             | 10736 | 12 | 5 | 0  | Low-quality | 6.03 |
| Sample_T12A_k141_1632             | 10508 | 11 | 0 | 10 | Low-quality | 6.02 |
| Sample_T2B_k141_58433             | 9520  | 9  | 0 | 6  | Low-quality | 6.02 |
| Sample_T2C_k141_144989            | 9375  | 7  | 2 | 0  | Low-quality | 6.02 |
| Sample_C12B_k141_169143           | 15845 | 10 | 5 | 0  | Low-quality | 6.02 |
| Sample_C11A_k141_17511            | 10372 | 17 | 0 | 1  | Low-quality | 6.01 |
| Sample_C5C_k141_76253             | 9344  | 12 | 1 | 1  | Low-quality | 6.01 |
| Sample_C6A_k141_192889            | 10669 | 11 | 0 | 8  | Low-quality | 6.01 |
| Sample_T6B_k141_107903            | 32564 | 33 | 1 | 17 | Low-quality | 6.01 |
| Sample_C5A_k141_177046            | 9850  | 16 | 1 | 4  | Low-quality | 6    |
| Sample_T3A_k141_3639              | 9232  | 7  | 0 | 6  | Low-quality | 6    |
| Sample_T8B_k141_187984            | 10722 | 9  | 1 | 5  | Low-quality | 6    |
| Sample_C4B_k141_15284             | 6045  | 12 | 1 | 1  | Low-quality | 6    |
| Sample_C5B_k141_74833             | 5467  | 7  | 1 | 1  | Low-quality | 6    |
| Sample_C12A_k141_67589            | 7725  | 10 | 2 | 0  | Low-quality | 5.99 |
| Sample_T11B_k141_81934            | 5567  | 1  | 0 | 0  | Low-quality | 5.99 |
| Sample_C13C_k141_61616            | 5771  | 14 | 4 | 1  | Low-quality | 5.99 |
| Sample_T12B_k141_47626            | 10145 | 17 | 4 | 1  | Low-quality | 5.99 |
| Sample_C11A_k141_7904             | 5183  | 9  | 1 | 3  | Low-quality | 5.98 |
| Sample_C3B_k141_133189            | 11139 | 12 | 0 | 11 | Low-quality | 5.98 |
| Sample_T4B_k141_12455_fragment_1  | 8900  | 10 | 1 | 0  | Low-quality | 5.98 |
| Sample_T8B_k141_127467            | 9678  | 15 | 6 | 1  | Low-quality | 5.98 |
| Sample_C10B_k141_89847            | 10998 | 19 | 1 | 1  | Low-quality | 5.97 |
| Sample_C13C_k141_802              | 5421  | 4  | 0 | 2  | Low-quality | 5.97 |
| Sample_C1C_k141_116706            | 11555 | 13 | 1 | 1  | Low-quality | 5.97 |
| Sample_T11B_k141_9102             | 19205 | 18 | 2 | 7  | Low-quality | 5.97 |
| Sample_T17B_k141_10351            | 8802  | 18 | 0 | 17 | Low-quality | 5.97 |
| Sample_C11B_k141_32068            | 8788  | 9  | 0 | 0  | Low-quality | 5.97 |

|                                  |       |    |   |    |             |      |
|----------------------------------|-------|----|---|----|-------------|------|
| Sample_C3A_k141_14719            | 6518  | 8  | 3 | 0  | Low-quality | 5.97 |
| Sample_C5A_k141_122242           | 11613 | 15 | 2 | 0  | Low-quality | 5.97 |
| Sample_T7A_k141_138664           | 6527  | 7  | 0 | 1  | Low-quality | 5.97 |
| Sample_C10A_k141_171684          | 5511  | 5  | 0 | 3  | Low-quality | 5.96 |
| Sample_C12A_k141_8505            | 5712  | 4  | 0 | 0  | Low-quality | 5.96 |
| Sample_T3C_k141_109966           | 5368  | 4  | 0 | 1  | Low-quality | 5.96 |
| Sample_T6A_k141_200456           | 5337  | 7  | 0 | 1  | Low-quality | 5.96 |
| Sample_T6A_k141_262169           | 5164  | 4  | 2 | 0  | Low-quality | 5.95 |
| Sample_C3B_k141_195083           | 8583  | 9  | 1 | 0  | Low-quality | 5.95 |
| Sample_C3C_k141_130343           | 6105  | 10 | 0 | 1  | Low-quality | 5.95 |
| Sample_T5A_k141_34504_fragment_1 | 14735 | 19 | 1 | 1  | Low-quality | 5.95 |
| Sample_C5A_k141_118682           | 5488  | 6  | 0 | 1  | Low-quality | 5.94 |
| Sample_T5B_k141_31501            | 6863  | 4  | 1 | 0  | Low-quality | 5.94 |
| Sample_T16C_k141_137041          | 10245 | 18 | 3 | 0  | Low-quality | 5.94 |
| Sample_C2C_k141_133078           | 5792  | 8  | 0 | 1  | Low-quality | 5.93 |
| Sample_C6C_k141_226895           | 10359 | 11 | 0 | 10 | Low-quality | 5.93 |
| Sample_T14C_k141_21946           | 17474 | 20 | 0 | 8  | Low-quality | 5.93 |
| Sample_T4C_k141_102685           | 10933 | 16 | 1 | 0  | Low-quality | 5.93 |
| Sample_T8A_k141_132137           | 6324  | 7  | 1 | 0  | Low-quality | 5.93 |
| Sample_C2C_k141_146620           | 5663  | 3  | 0 | 0  | Low-quality | 5.92 |
| Sample_T14B_k141_109044          | 6371  | 5  | 0 | 3  | Low-quality | 5.92 |
| Sample_T18B_k141_122170          | 6846  | 4  | 1 | 0  | Low-quality | 5.92 |
| Sample_T4C_k141_40881            | 8805  | 14 | 1 | 1  | Low-quality | 5.92 |
| Sample_C4B_k141_238529           | 10625 | 21 | 1 | 0  | Low-quality | 5.92 |
| Sample_C11B_k141_41172           | 5594  | 4  | 0 | 2  | Low-quality | 5.91 |
| Sample_T12A_k141_183614          | 5613  | 7  | 0 | 2  | Low-quality | 5.91 |
| Sample_T12C_k141_139971          | 9197  | 19 | 1 | 0  | Low-quality | 5.91 |
| Sample_T12C_k141_30216           | 6109  | 4  | 0 | 1  | Low-quality | 5.91 |
| Sample_T16C_k141_45138           | 5783  | 10 | 0 | 2  | Low-quality | 5.91 |
| Sample_T7B_k141_84573            | 5363  | 8  | 0 | 1  | Low-quality | 5.91 |
| Sample_T14C_k141_165290          | 6259  | 12 | 1 | 0  | Low-quality | 5.91 |
| Sample_T14A_k141_195534          | 9118  | 15 | 1 | 1  | Low-quality | 5.9  |
| Sample_T16A_k141_32814           | 15586 | 12 | 1 | 4  | Low-quality | 5.9  |
| Sample_C11B_k141_234660          | 6210  | 11 | 2 | 0  | Low-quality | 5.9  |
| Sample_C5C_k141_18105            | 7769  | 8  | 0 | 3  | Low-quality | 5.9  |
| Sample_T12C_k141_18322           | 5565  | 10 | 1 | 0  | Low-quality | 5.9  |
| Sample_T17B_k141_24988           | 9457  | 14 | 3 | 2  | Low-quality | 5.9  |
| Sample_C4A_k141_164157           | 10933 | 32 | 0 | 0  | Low-quality | 5.89 |
| Sample_C14A_k141_34616           | 10449 | 11 | 4 | 0  | Low-quality | 5.89 |

|                                    |       |    |   |    |             |      |
|------------------------------------|-------|----|---|----|-------------|------|
| Sample_T3B_k141_33436              | 12767 | 18 | 1 | 0  | Low-quality | 5.88 |
| Sample_T12A_k141_85598             | 9508  | 7  | 2 | 2  | Low-quality | 5.88 |
| Sample_T12C_k141_104826            | 10125 | 13 | 3 | 1  | Low-quality | 5.88 |
| Sample_T16B_k141_124446            | 10638 | 12 | 3 | 0  | Low-quality | 5.88 |
| Sample_C11C_k141_186211            | 9961  | 13 | 1 | 1  | Low-quality | 5.87 |
| Sample_T6A_k141_300796             | 8969  | 11 | 1 | 0  | Low-quality | 5.86 |
| Sample_C4C_k141_212056             | 6229  | 10 | 2 | 0  | Low-quality | 5.86 |
| Sample_C6C_k141_55527              | 8602  | 8  | 0 | 0  | Low-quality | 5.86 |
| Sample_C8B_k141_159072             | 5457  | 10 | 1 | 1  | Low-quality | 5.86 |
| Sample_T13B_k141_175430            | 8858  | 12 | 2 | 0  | Low-quality | 5.85 |
| Sample_C10C_k141_43508             | 10202 | 13 | 0 | 10 | Low-quality | 5.84 |
| Sample_C10C_k141_122755            | 5145  | 7  | 5 | 0  | Low-quality | 5.84 |
| Sample_C4B_k141_58815              | 8138  | 10 | 0 | 4  | Low-quality | 5.83 |
| Sample_T4B_k141_280465             | 8115  | 6  | 0 | 5  | Low-quality | 5.83 |
| Sample_C6A_k141_128017             | 9898  | 16 | 1 | 0  | Low-quality | 5.83 |
| Sample_C7B_k141_38643              | 6167  | 9  | 0 | 0  | Low-quality | 5.83 |
| Sample_C7B_k141_50291              | 5549  | 4  | 0 | 0  | Low-quality | 5.82 |
| Sample_T18C_k141_44566             | 6019  | 1  | 0 | 0  | Low-quality | 5.82 |
| Sample_C4A_k141_113210             | 8623  | 8  | 0 | 1  | Low-quality | 5.82 |
| Sample_C4B_k141_147348             | 9713  | 24 | 0 | 0  | Low-quality | 5.82 |
| Sample_C4B_k141_112958_fragment_3  | 9047  | 9  | 1 | 1  | Low-quality | 5.82 |
| Sample_T18B_k141_115071_fragment_1 | 8074  | 11 | 1 | 1  | Low-quality | 5.82 |
| Sample_T5B_k141_67803              | 6406  | 12 | 1 | 0  | Low-quality | 5.82 |
| Sample_C4C_k141_187112             | 6222  | 6  | 0 | 1  | Low-quality | 5.81 |
| Sample_T10A_k141_106934            | 8015  | 7  | 0 | 7  | Low-quality | 5.81 |
| Sample_T14B_k141_113479            | 7440  | 6  | 0 | 2  | Low-quality | 5.81 |
| Sample_T8B_k141_40715              | 17965 | 13 | 0 | 9  | Low-quality | 5.81 |
| Sample_C1B_k141_89579              | 6410  | 6  | 0 | 1  | Low-quality | 5.81 |
| Sample_C4A_k141_166498             | 8438  | 9  | 6 | 0  | Low-quality | 5.81 |
| Sample_C6B_k141_95257              | 5489  | 7  | 2 | 0  | Low-quality | 5.81 |
| Sample_T16B_k141_85130             | 10275 | 29 | 1 | 0  | Low-quality | 5.81 |
| Sample_C3A_k141_40306              | 6270  | 11 | 3 | 0  | Low-quality | 5.8  |
| Sample_T12A_k141_313643            | 5492  | 5  | 1 | 0  | Low-quality | 5.8  |
| Sample_T14A_k141_233342            | 5131  | 7  | 2 | 1  | Low-quality | 5.8  |
| Sample_C6B_k141_104251             | 5815  | 3  | 0 | 3  | Low-quality | 5.79 |
| Sample_T3C_k141_108704             | 11813 | 11 | 0 | 10 | Low-quality | 5.79 |
| Sample_T4B_k141_106131             | 31661 | 57 | 1 | 0  | Low-quality | 5.79 |
| Sample_T7C_k141_27307              | 5306  | 8  | 1 | 1  | Low-quality | 5.79 |
| Sample_C3C_k141_72993              | 8383  | 13 | 1 | 1  | Low-quality | 5.79 |



|                         |       |    |   |    |             |      |
|-------------------------|-------|----|---|----|-------------|------|
| Sample_C9A_k141_55652   | 5814  | 11 | 2 | 0  | Low-quality | 5.79 |
| Sample_C8B_k141_201605  | 5502  | 7  | 1 | 0  | Low-quality | 5.78 |
| Sample_T1A_k141_9188    | 6986  | 7  | 1 | 2  | Low-quality | 5.78 |
| Sample_C9C_k141_12568   | 10271 | 17 | 2 | 0  | Low-quality | 5.78 |
| Sample_T16C_k141_125926 | 8180  | 11 | 0 | 0  | Low-quality | 5.78 |
| Sample_C14C_k141_3451   | 13274 | 18 | 2 | 7  | Low-quality | 5.77 |
| Sample_C6C_k141_71112   | 16427 | 12 | 0 | 8  | Low-quality | 5.77 |
| Sample_C9C_k141_62570   | 10637 | 19 | 1 | 2  | Low-quality | 5.77 |
| Sample_T12A_k141_1120   | 5054  | 10 | 1 | 1  | Low-quality | 5.77 |
| Sample_T6A_k141_179861  | 8262  | 17 | 3 | 0  | Low-quality | 5.77 |
| Sample_T6A_k141_62339   | 8578  | 8  | 1 | 0  | Low-quality | 5.76 |
| Sample_T7A_k141_193254  | 5292  | 8  | 2 | 2  | Low-quality | 5.76 |
| Sample_T10A_k141_118966 | 9257  | 8  | 0 | 5  | Low-quality | 5.75 |
| Sample_T13C_k141_108117 | 7712  | 3  | 0 | 0  | Low-quality | 5.75 |
| Sample_T10A_k141_135733 | 7991  | 14 | 0 | 0  | Low-quality | 5.75 |
| Sample_T14A_k141_180713 | 5507  | 6  | 0 | 1  | Low-quality | 5.75 |
| Sample_T2B_k141_141437  | 5394  | 9  | 1 | 0  | Low-quality | 5.75 |
| Sample_C13B_k141_68826  | 7971  | 8  | 1 | 0  | Low-quality | 5.74 |
| Sample_C8B_k141_42594   | 5815  | 7  | 2 | 1  | Low-quality | 5.74 |
| Sample_T10A_k141_151322 | 7837  | 8  | 0 | 8  | Low-quality | 5.73 |
| Sample_T14A_k141_123914 | 7701  | 7  | 0 | 6  | Low-quality | 5.73 |
| Sample_T6A_k141_100167  | 7230  | 7  | 0 | 6  | Low-quality | 5.73 |
| Sample_T6A_k141_185932  | 6215  | 6  | 0 | 3  | Low-quality | 5.73 |
| Sample_C6A_k141_64571   | 5549  | 5  | 0 | 2  | Low-quality | 5.72 |
| Sample_T15A_k141_40256  | 9432  | 12 | 1 | 3  | Low-quality | 5.72 |
| Sample_T6A_k141_147478  | 9857  | 15 | 1 | 0  | Low-quality | 5.72 |
| Sample_T12C_k141_172006 | 8121  | 6  | 0 | 3  | Low-quality | 5.71 |
| Sample_C10A_k141_243930 | 5144  | 17 | 1 | 0  | Low-quality | 5.71 |
| Sample_C4B_k141_162656  | 5597  | 3  | 0 | 1  | Low-quality | 5.7  |
| Sample_T6A_k141_43688   | 9401  | 18 | 2 | 2  | Low-quality | 5.7  |
| Sample_T8A_k141_193928  | 18467 | 14 | 0 | 13 | Low-quality | 5.7  |
| Sample_C10A_k141_183279 | 10117 | 11 | 0 | 7  | Low-quality | 5.69 |
| Sample_T11A_k141_35213  | 9925  | 12 | 0 | 11 | Low-quality | 5.69 |
| Sample_T12A_k141_60003  | 11070 | 11 | 0 | 8  | Low-quality | 5.69 |
| Sample_T14A_k141_39648  | 5030  | 5  | 1 | 0  | Low-quality | 5.69 |
| Sample_T4B_k141_227592  | 7791  | 10 | 1 | 0  | Low-quality | 5.69 |
| Sample_C1A_k141_259433  | 5224  | 2  | 0 | 0  | Low-quality | 5.68 |
| Sample_T4A_k141_78792   | 7899  | 8  | 0 | 0  | Low-quality | 5.68 |
| Sample_T7C_k141_159017  | 8763  | 13 | 1 | 0  | Low-quality | 5.68 |

|                                  |       |    |   |    |             |      |
|----------------------------------|-------|----|---|----|-------------|------|
| Sample_T8B_k141_158759           | 9432  | 8  | 4 | 1  | Low-quality | 5.68 |
| Sample_C1C_k141_43461            | 8089  | 8  | 0 | 5  | Low-quality | 5.67 |
| Sample_T6C_k141_93093            | 5492  | 5  | 0 | 2  | Low-quality | 5.67 |
| Sample_T7A_k141_168659           | 5675  | 2  | 0 | 0  | Low-quality | 5.67 |
| Sample_T8B_k141_55742            | 7709  | 8  | 1 | 1  | Low-quality | 5.67 |
| Sample_T7A_k141_84034            | 9670  | 11 | 1 | 4  | Low-quality | 5.66 |
| Sample_T7B_k141_80654            | 5660  | 5  | 0 | 2  | Low-quality | 5.66 |
| Sample_C11A_k141_2151            | 8193  | 14 | 0 | 0  | Low-quality | 5.66 |
| Sample_T6A_k141_88389            | 5813  | 17 | 1 | 0  | Low-quality | 5.66 |
| Sample_T8C_k141_211713           | 8479  | 10 | 1 | 0  | Low-quality | 5.66 |
| Sample_C12C_k141_180549          | 5607  | 6  | 1 | 1  | Low-quality | 5.65 |
| Sample_C13A_k141_66674           | 7199  | 9  | 1 | 1  | Low-quality | 5.65 |
| Sample_C1C_k141_4907             | 8551  | 5  | 0 | 5  | Low-quality | 5.65 |
| Sample_C7A_k141_91787            | 12304 | 7  | 0 | 3  | Low-quality | 5.65 |
| Sample_T11C_k141_131401          | 6348  | 10 | 1 | 1  | Low-quality | 5.65 |
| Sample_T16B_k141_43015           | 7385  | 9  | 0 | 2  | Low-quality | 5.65 |
| Sample_C1B_k141_175950           | 11523 | 10 | 0 | 9  | Low-quality | 5.64 |
| Sample_C5C_k141_112500           | 7326  | 9  | 0 | 3  | Low-quality | 5.64 |
| Sample_T12A_k141_94068           | 5295  | 6  | 0 | 2  | Low-quality | 5.64 |
| Sample_T17B_k141_28813           | 9844  | 11 | 0 | 8  | Low-quality | 5.64 |
| Sample_C2A_k141_81299_fragment_1 | 11477 | 12 | 1 | 3  | Low-quality | 5.64 |
| Sample_C6C_k141_195783           | 5819  | 10 | 0 | 1  | Low-quality | 5.64 |
| Sample_C9A_k141_103803           | 7832  | 13 | 1 | 0  | Low-quality | 5.64 |
| Sample_C10A_k141_151787          | 16521 | 23 | 3 | 2  | Low-quality | 5.63 |
| Sample_C10C_k141_865             | 17832 | 17 | 0 | 11 | Low-quality | 5.63 |
| Sample_C2C_k141_74746            | 70059 | 66 | 1 | 43 | Low-quality | 5.63 |
| Sample_T2A_k141_11158            | 13381 | 7  | 1 | 2  | Low-quality | 5.63 |
| Sample_T5C_k141_153862           | 7816  | 9  | 1 | 5  | Low-quality | 5.63 |
| Sample_C11B_k141_60355           | 8868  | 13 | 1 | 0  | Low-quality | 5.63 |
| Sample_T10A_k141_50105           | 7529  | 19 | 4 | 0  | Low-quality | 5.63 |
| Sample_T2A_k141_213677           | 9558  | 9  | 0 | 1  | Low-quality | 5.63 |
| Sample_T1B_k141_10439            | 5339  | 4  | 0 | 2  | Low-quality | 5.62 |
| Sample_T14A_k141_207808          | 7859  | 10 | 0 | 1  | Low-quality | 5.61 |
| Sample_T8A_k141_244128           | 5645  | 10 | 0 | 2  | Low-quality | 5.61 |
| Sample_T8C_k141_176517           | 5324  | 3  | 0 | 0  | Low-quality | 5.61 |
| Sample_C1A_k141_66798            | 5538  | 9  | 1 | 1  | Low-quality | 5.6  |
| Sample_C6B_k141_54856            | 11525 | 24 | 1 | 0  | Low-quality | 5.6  |
| Sample_T7A_k141_53443_fragment_1 | 6975  | 13 | 1 | 1  | Low-quality | 5.6  |
| Sample_C2C_k141_121257           | 40563 | 36 | 3 | 12 | Low-quality | 5.59 |

|                                   |        |     |   |     |             |      |
|-----------------------------------|--------|-----|---|-----|-------------|------|
| Sample_T13C_k141_96503            | 5945   | 8   | 1 | 2   | Low-quality | 5.59 |
| Sample_T14B_k141_133615           | 8522   | 10  | 1 | 3   | Low-quality | 5.59 |
| Sample_C2A_k141_74994_fragment_1  | 8313   | 8   | 1 | 0   | Low-quality | 5.59 |
| Sample_C7B_k141_128760            | 5251   | 8   | 0 | 2   | Low-quality | 5.59 |
| Sample_C2B_k141_102882_fragment_1 | 8492   | 8   | 1 | 0   | Low-quality | 5.58 |
| Sample_T8B_k141_77602             | 5690   | 4   | 0 | 0   | Low-quality | 5.58 |
| Sample_C3A_k141_121633            | 12937  | 14  | 1 | 2   | Low-quality | 5.57 |
| Sample_T14A_k141_22954            | 9719   | 8   | 0 | 7   | Low-quality | 5.57 |
| Sample_C2B_k141_265687            | 10248  | 12  | 1 | 0   | Low-quality | 5.56 |
| Sample_C6B_k141_138401            | 5850   | 5   | 0 | 2   | Low-quality | 5.56 |
| Sample_T15A_k141_117992           | 11318  | 11  | 0 | 10  | Low-quality | 5.56 |
| Sample_T5A_k141_9006              | 5172   | 7   | 1 | 0   | Low-quality | 5.56 |
| Sample_C10C_k141_146886           | 21075  | 24  | 1 | 6   | Low-quality | 5.55 |
| Sample_C2B_k141_152664            | 7347   | 9   | 0 | 4   | Low-quality | 5.55 |
| Sample_T16C_k141_40880            | 6503   | 3   | 0 | 3   | Low-quality | 5.55 |
| Sample_T10A_k141_57061            | 11294  | 24  | 2 | 2   | Low-quality | 5.54 |
| Sample_T2A_k141_136546            | 9646   | 21  | 1 | 0   | Low-quality | 5.54 |
| Sample_T8B_k141_67698             | 8647   | 10  | 0 | 5   | Low-quality | 5.54 |
| Sample_C2C_k141_116597            | 8341   | 12  | 2 | 1   | Low-quality | 5.53 |
| Sample_T18C_k141_108467           | 5252   | 4   | 0 | 2   | Low-quality | 5.53 |
| Sample_T13C_k141_141773           | 8326   | 11  | 1 | 0   | Low-quality | 5.53 |
| Sample_T16B_k141_173465           | 9767   | 26  | 6 | 0   | Low-quality | 5.53 |
| Sample_T8B_k141_41265             | 9544   | 8   | 5 | 0   | Low-quality | 5.53 |
| Sample_C11B_k141_59209            | 11259  | 11  | 1 | 1   | Low-quality | 5.52 |
| Sample_C4A_k141_6337              | 18830  | 19  | 0 | 12  | Low-quality | 5.52 |
| Sample_C6C_k141_77628             | 6006   | 6   | 0 | 3   | Low-quality | 5.52 |
| Sample_C2C_k141_9824              | 5833   | 10  | 0 | 0   | Low-quality | 5.52 |
| Sample_C2C_k141_25044             | 10423  | 9   | 0 | 8   | Low-quality | 5.51 |
| Sample_T14A_k141_1994             | 150220 | 160 | 6 | 117 | Low-quality | 5.51 |
| Sample_T3C_k141_89119             | 5608   | 2   | 0 | 0   | Low-quality | 5.51 |
| Sample_T5C_k141_97075             | 8164   | 10  | 1 | 1   | Low-quality | 5.51 |
| Sample_T8B_k141_75205             | 9600   | 8   | 1 | 0   | Low-quality | 5.51 |
| Sample_C11B_k141_133662           | 8184   | 15  | 1 | 4   | Low-quality | 5.5  |
| Sample_C2B_k141_242729            | 5624   | 6   | 0 | 0   | Low-quality | 5.5  |
| Sample_T14C_k141_120426           | 11217  | 16  | 1 | 2   | Low-quality | 5.5  |
| Sample_T16C_k141_68974            | 8025   | 7   | 0 | 2   | Low-quality | 5.5  |
| Sample_T2C_k141_10321             | 6012   | 11  | 0 | 2   | Low-quality | 5.5  |
| Sample_T5B_k141_28373             | 13343  | 19  | 2 | 1   | Low-quality | 5.5  |
| Sample_C10A_k141_227248           | 8596   | 6   | 0 | 1   | Low-quality | 5.49 |

|                                   |       |    |   |   |             |      |
|-----------------------------------|-------|----|---|---|-------------|------|
| Sample_C13A_k141_38330            | 7514  | 7  | 0 | 1 | Low-quality | 5.49 |
| Sample_C13A_k141_35022            | 5154  | 10 | 0 | 0 | Low-quality | 5.49 |
| Sample_T1B_k141_4696              | 12647 | 14 | 1 | 4 | Low-quality | 5.49 |
| Sample_C7C_k141_2697_fragment_1   | 7243  | 11 | 1 | 0 | Low-quality | 5.49 |
| Sample_C11B_k141_222377           | 15283 | 16 | 0 | 9 | Low-quality | 5.48 |
| Sample_C1A_k141_80477             | 5113  | 14 | 0 | 0 | Low-quality | 5.48 |
| Sample_C6C_k141_78302             | 6018  | 7  | 1 | 3 | Low-quality | 5.48 |
| Sample_T10B_k141_110229           | 7273  | 11 | 3 | 0 | Low-quality | 5.48 |
| Sample_C2C_k141_176455            | 9689  | 7  | 1 | 0 | Low-quality | 5.47 |
| Sample_C1B_k141_82783             | 9525  | 9  | 0 | 7 | Low-quality | 5.46 |
| Sample_T18C_k141_48293            | 11384 | 6  | 1 | 1 | Low-quality | 5.46 |
| Sample_T4A_k141_61851             | 5128  | 7  | 0 | 1 | Low-quality | 5.46 |
| Sample_C14A_k141_172055           | 8204  | 9  | 0 | 0 | Low-quality | 5.45 |
| Sample_C3A_k141_86237             | 7379  | 8  | 0 | 3 | Low-quality | 5.45 |
| Sample_C6C_k141_28747             | 10792 | 9  | 0 | 8 | Low-quality | 5.45 |
| Sample_T16A_k141_29075            | 8098  | 6  | 1 | 0 | Low-quality | 5.45 |
| Sample_T16C_k141_91814            | 5317  | 8  | 0 | 0 | Low-quality | 5.45 |
| Sample_T2C_k141_178950            | 7807  | 9  | 2 | 0 | Low-quality | 5.45 |
| Sample_T4B_k141_19299             | 9341  | 7  | 0 | 5 | Low-quality | 5.45 |
| Sample_T7C_k141_153389            | 7378  | 23 | 0 | 0 | Low-quality | 5.45 |
| Sample_T8C_k141_199381            | 5406  | 8  | 0 | 2 | Low-quality | 5.45 |
| Sample_C2C_k141_254578            | 5860  | 5  | 0 | 1 | Low-quality | 5.44 |
| Sample_C6C_k141_100174            | 5882  | 3  | 0 | 2 | Low-quality | 5.44 |
| Sample_T10B_k141_69438            | 5006  | 1  | 0 | 0 | Low-quality | 5.44 |
| Sample_C13A_k141_114109           | 5711  | 11 | 3 | 0 | Low-quality | 5.44 |
| Sample_T8C_k141_98421             | 7181  | 13 | 1 | 0 | Low-quality | 5.44 |
| Sample_C2A_k141_287083            | 5541  | 5  | 0 | 3 | Low-quality | 5.43 |
| Sample_T13C_k141_44390            | 8412  | 8  | 0 | 7 | Low-quality | 5.43 |
| Sample_T16C_k141_90138_fragment_1 | 8445  | 8  | 1 | 0 | Low-quality | 5.43 |
| Sample_T4B_k141_18156_fragment_2  | 12148 | 10 | 0 | 3 | Low-quality | 5.43 |
| Sample_T6B_k141_159948            | 9994  | 15 | 1 | 1 | Low-quality | 5.42 |
| Sample_C5A_k141_144955            | 9044  | 16 | 3 | 1 | Low-quality | 5.42 |
| Sample_T14A_k141_9461             | 5182  | 8  | 0 | 1 | Low-quality | 5.42 |
| Sample_C4B_k141_131879            | 8846  | 15 | 1 | 1 | Low-quality | 5.41 |
| Sample_C7A_k141_2823              | 8062  | 9  | 1 | 1 | Low-quality | 5.41 |
| Sample_C1B_k141_32558             | 16579 | 12 | 0 | 5 | Low-quality | 5.4  |
| Sample_C3C_k141_183908            | 5919  | 6  | 1 | 0 | Low-quality | 5.4  |
| Sample_C5C_k141_67365             | 10756 | 9  | 0 | 4 | Low-quality | 5.4  |
| Sample_T13A_k141_7897             | 7776  | 9  | 0 | 5 | Low-quality | 5.4  |

|                                   |       |    |   |    |             |      |
|-----------------------------------|-------|----|---|----|-------------|------|
| Sample_T10C_k141_15422            | 7798  | 6  | 1 | 0  | Low-quality | 5.39 |
| Sample_C4B_k141_224127            | 9584  | 11 | 1 | 2  | Low-quality | 5.38 |
| Sample_T8C_k141_73206             | 6107  | 1  | 0 | 0  | Low-quality | 5.38 |
| Sample_C10C_k141_141388           | 7989  | 6  | 0 | 0  | Low-quality | 5.38 |
| Sample_C4A_k141_242061            | 5751  | 7  | 0 | 0  | Low-quality | 5.38 |
| Sample_T17B_k141_37562_fragment_1 | 13403 | 19 | 3 | 3  | Low-quality | 5.38 |
| Sample_C10B_k141_156709           | 12532 | 11 | 1 | 2  | Low-quality | 5.37 |
| Sample_C11C_k141_35605            | 6354  | 6  | 4 | 0  | Low-quality | 5.37 |
| Sample_C5B_k141_7067              | 5048  | 7  | 0 | 2  | Low-quality | 5.37 |
| Sample_T12C_k141_192995           | 5321  | 4  | 0 | 1  | Low-quality | 5.37 |
| Sample_T6A_k141_164744            | 9517  | 7  | 1 | 0  | Low-quality | 5.37 |
| Sample_C11C_k141_171162           | 6330  | 11 | 1 | 3  | Low-quality | 5.36 |
| Sample_T13C_k141_20688            | 9333  | 18 | 0 | 0  | Low-quality | 5.36 |
| Sample_T1A_k141_8340              | 11347 | 7  | 0 | 5  | Low-quality | 5.36 |
| Sample_C14C_k141_22447            | 7073  | 13 | 1 | 1  | Low-quality | 5.36 |
| Sample_C3A_k141_187859            | 7967  | 14 | 1 | 0  | Low-quality | 5.36 |
| Sample_T10A_k141_24532            | 7138  | 9  | 0 | 0  | Low-quality | 5.36 |
| Sample_C2C_k141_298718            | 8749  | 17 | 1 | 1  | Low-quality | 5.35 |
| Sample_C8B_k141_22966             | 5467  | 1  | 0 | 0  | Low-quality | 5.35 |
| Sample_T1B_k141_44016             | 5580  | 4  | 0 | 3  | Low-quality | 5.35 |
| Sample_T12A_k141_258185           | 12433 | 12 | 1 | 3  | Low-quality | 5.35 |
| Sample_C10A_k141_183754           | 10921 | 12 | 0 | 5  | Low-quality | 5.34 |
| Sample_T12A_k141_284258           | 5588  | 7  | 1 | 2  | Low-quality | 5.34 |
| Sample_T14A_k141_84534_fragment_1 | 13157 | 17 | 1 | 3  | Low-quality | 5.34 |
| Sample_T8C_k141_24438             | 6096  | 17 | 3 | 0  | Low-quality | 5.34 |
| Sample_C1C_k141_64199             | 9485  | 9  | 0 | 5  | Low-quality | 5.33 |
| Sample_C5A_k141_30111             | 8837  | 8  | 0 | 1  | Low-quality | 5.33 |
| Sample_T8C_k141_141537            | 5587  | 6  | 0 | 2  | Low-quality | 5.33 |
| Sample_C14B_k141_65840            | 29149 | 29 | 1 | 22 | Low-quality | 5.32 |
| Sample_C1A_k141_92769             | 5197  | 5  | 0 | 2  | Low-quality | 5.32 |
| Sample_C8B_k141_96504             | 5075  | 2  | 0 | 0  | Low-quality | 5.32 |
| Sample_T15A_k141_111156           | 6307  | 5  | 0 | 1  | Low-quality | 5.32 |
| Sample_T2A_k141_97736             | 9141  | 10 | 0 | 5  | Low-quality | 5.32 |
| Sample_T7A_k141_108676            | 5857  | 4  | 0 | 0  | Low-quality | 5.32 |
| Sample_T7B_k141_17167             | 11255 | 7  | 0 | 6  | Low-quality | 5.32 |
| Sample_T8A_k141_170000            | 5215  | 6  | 0 | 1  | Low-quality | 5.32 |
| Sample_C11A_k141_36733            | 7785  | 14 | 2 | 0  | Low-quality | 5.32 |
| Sample_C7A_k141_52339             | 10634 | 6  | 1 | 1  | Low-quality | 5.32 |
| Sample_T2B_k141_82213             | 11444 | 33 | 3 | 0  | Low-quality | 5.32 |

|                                   |       |    |   |   |             |      |
|-----------------------------------|-------|----|---|---|-------------|------|
| Sample_C14A_k141_48881            | 7489  | 8  | 1 | 2 | Low-quality | 5.31 |
| Sample_C5A_k141_74247             | 5553  | 5  | 0 | 1 | Low-quality | 5.31 |
| Sample_C8A_k141_5800              | 5527  | 3  | 0 | 3 | Low-quality | 5.31 |
| Sample_T12A_k141_305296           | 5816  | 5  | 1 | 0 | Low-quality | 5.31 |
| Sample_C9A_k141_67602             | 6903  | 8  | 0 | 6 | Low-quality | 5.3  |
| Sample_C8B_k141_45336             | 10816 | 9  | 1 | 0 | Low-quality | 5.3  |
| Sample_C12C_k141_173767           | 9481  | 11 | 1 | 2 | Low-quality | 5.29 |
| Sample_T11A_k141_82503            | 6999  | 7  | 1 | 4 | Low-quality | 5.29 |
| Sample_T1C_k141_8968              | 6950  | 11 | 0 | 3 | Low-quality | 5.29 |
| Sample_C3A_k141_225541_fragment_1 | 9746  | 21 | 1 | 0 | Low-quality | 5.29 |
| Sample_T12C_k141_117751           | 8325  | 14 | 2 | 1 | Low-quality | 5.29 |
| Sample_C2A_k141_168205            | 7590  | 8  | 0 | 3 | Low-quality | 5.28 |
| Sample_C7B_k141_1969              | 10760 | 11 | 0 | 7 | Low-quality | 5.28 |
| Sample_T13B_k141_61673            | 8007  | 7  | 0 | 5 | Low-quality | 5.28 |
| Sample_C2C_k141_180355            | 16191 | 28 | 1 | 5 | Low-quality | 5.27 |
| Sample_T12A_k141_271985           | 5428  | 5  | 0 | 3 | Low-quality | 5.26 |
| Sample_C1C_k141_98868_fragment_1  | 10466 | 10 | 0 | 6 | Low-quality | 5.26 |
| Sample_T12C_k141_180632           | 9662  | 18 | 9 | 0 | Low-quality | 5.26 |
| Sample_C1B_k141_240801            | 9160  | 10 | 0 | 8 | Low-quality | 5.25 |
| Sample_C7B_k141_162230            | 6178  | 8  | 3 | 0 | Low-quality | 5.25 |
| Sample_T13C_k141_117170           | 7788  | 7  | 0 | 2 | Low-quality | 5.25 |
| Sample_T2A_k141_248693            | 9469  | 15 | 4 | 0 | Low-quality | 5.25 |
| Sample_C6C_k141_27830             | 7779  | 8  | 0 | 5 | Low-quality | 5.24 |
| Sample_C7B_k141_114229            | 5700  | 5  | 0 | 1 | Low-quality | 5.24 |
| Sample_C7B_k141_156458            | 8710  | 3  | 0 | 0 | Low-quality | 5.24 |
| Sample_T3C_k141_29146             | 9655  | 16 | 1 | 1 | Low-quality | 5.24 |
| Sample_C11C_k141_80286            | 7082  | 7  | 1 | 2 | Low-quality | 5.24 |
| Sample_C6C_k141_223951_fragment_1 | 10894 | 9  | 1 | 1 | Low-quality | 5.24 |
| Sample_C3A_k141_78997             | 6527  | 11 | 1 | 1 | Low-quality | 5.22 |
| Sample_C6A_k141_38191             | 7222  | 3  | 0 | 0 | Low-quality | 5.22 |
| Sample_T18A_k141_49583            | 5648  | 4  | 0 | 3 | Low-quality | 5.22 |
| Sample_T10A_k141_134276           | 7883  | 10 | 1 | 1 | Low-quality | 5.22 |
| Sample_T12C_k141_91197            | 7406  | 10 | 1 | 1 | Low-quality | 5.22 |
| Sample_C5B_k141_43314             | 7405  | 5  | 0 | 2 | Low-quality | 5.21 |
| Sample_C9A_k141_71117             | 5274  | 1  | 0 | 0 | Low-quality | 5.2  |
| Sample_T2A_k141_264988            | 17077 | 17 | 2 | 3 | Low-quality | 5.2  |
| Sample_C10B_k141_154532           | 8415  | 9  | 0 | 0 | Low-quality | 5.2  |
| Sample_C11C_k141_80721            | 6051  | 7  | 0 | 2 | Low-quality | 5.2  |
| Sample_T13A_k141_85491            | 9066  | 10 | 0 | 7 | Low-quality | 5.19 |

|                                    |       |    |   |    |             |      |
|------------------------------------|-------|----|---|----|-------------|------|
| Sample_C7A_k141_3971               | 8003  | 16 | 2 | 0  | Low-quality | 5.19 |
| Sample_T8C_k141_135305             | 12036 | 15 | 1 | 5  | Low-quality | 5.18 |
| Sample_C1B_k141_102639             | 5149  | 8  | 1 | 0  | Low-quality | 5.18 |
| Sample_T13C_k141_112206            | 7446  | 17 | 2 | 0  | Low-quality | 5.18 |
| Sample_C2C_k141_70283              | 5466  | 10 | 2 | 0  | Low-quality | 5.17 |
| Sample_C4A_k141_92103              | 14507 | 14 | 1 | 2  | Low-quality | 5.17 |
| Sample_C5B_k141_9437               | 7256  | 6  | 0 | 2  | Low-quality | 5.17 |
| Sample_T1B_k141_29778              | 10279 | 15 | 2 | 3  | Low-quality | 5.17 |
| Sample_T14A_k141_231518            | 9011  | 9  | 0 | 6  | Low-quality | 5.16 |
| Sample_T4C_k141_235                | 8663  | 6  | 1 | 3  | Low-quality | 5.16 |
| Sample_C12B_k141_193765            | 5359  | 9  | 1 | 0  | Low-quality | 5.16 |
| Sample_C5A_k141_244952_fragment_2  | 19956 | 23 | 1 | 1  | Low-quality | 5.16 |
| Sample_T12B_k141_99835             | 7666  | 10 | 1 | 0  | Low-quality | 5.16 |
| Sample_C12B_k141_183891            | 5606  | 6  | 0 | 1  | Low-quality | 5.15 |
| Sample_C3B_k141_205250             | 8989  | 11 | 0 | 10 | Low-quality | 5.15 |
| Sample_C13A_k141_112979            | 9500  | 13 | 1 | 0  | Low-quality | 5.15 |
| Sample_T14A_k141_152365            | 6357  | 7  | 1 | 0  | Low-quality | 5.15 |
| Sample_T6A_k141_192447             | 8747  | 17 | 2 | 0  | Low-quality | 5.15 |
| Sample_C1B_k141_3675               | 21099 | 27 | 3 | 14 | Low-quality | 5.14 |
| Sample_C11C_k141_108016            | 6067  | 12 | 0 | 0  | Low-quality | 5.14 |
| Sample_T6C_k141_103809_fragment_1  | 9980  | 17 | 2 | 1  | Low-quality | 5.14 |
| Sample_C12C_k141_113537            | 5864  | 7  | 1 | 0  | Low-quality | 5.13 |
| Sample_C2C_k141_91230              | 9536  | 9  | 0 | 4  | Low-quality | 5.13 |
| Sample_C3C_k141_120752             | 6728  | 9  | 2 | 0  | Low-quality | 5.13 |
| Sample_C5B_k141_25786              | 11137 | 22 | 2 | 0  | Low-quality | 5.13 |
| Sample_C13A_k141_85632             | 9113  | 9  | 0 | 2  | Low-quality | 5.12 |
| Sample_C6C_k141_143963             | 10224 | 8  | 0 | 7  | Low-quality | 5.12 |
| Sample_T15A_k141_159271            | 5143  | 5  | 0 | 2  | Low-quality | 5.12 |
| Sample_C1C_k141_123258             | 5253  | 8  | 2 | 1  | Low-quality | 5.12 |
| Sample_T11A_k141_90097             | 6055  | 7  | 0 | 0  | Low-quality | 5.12 |
| Sample_T6A_k141_205290             | 8344  | 13 | 1 | 0  | Low-quality | 5.11 |
| Sample_T8B_k141_128773             | 5636  | 7  | 1 | 0  | Low-quality | 5.11 |
| Sample_C2A_k141_59804              | 11077 | 10 | 0 | 7  | Low-quality | 5.1  |
| Sample_T16C_k141_146211            | 5010  | 9  | 0 | 2  | Low-quality | 5.1  |
| Sample_T7C_k141_34619              | 5602  | 3  | 0 | 2  | Low-quality | 5.1  |
| Sample_T8B_k141_48554              | 5509  | 4  | 0 | 2  | Low-quality | 5.1  |
| Sample_C12A_k141_192104_fragment_1 | 11343 | 9  | 1 | 1  | Low-quality | 5.1  |
| Sample_C5C_k141_37106              | 6129  | 5  | 3 | 0  | Low-quality | 5.1  |
| Sample_C5C_k141_8043               | 10820 | 9  | 1 | 2  | Low-quality | 5.1  |

|                         |       |    |   |    |             |      |
|-------------------------|-------|----|---|----|-------------|------|
| Sample_C10C_k141_91561  | 12478 | 13 | 0 | 1  | Low-quality | 5.09 |
| Sample_C12B_k141_124689 | 15795 | 12 | 0 | 8  | Low-quality | 5.09 |
| Sample_T11B_k141_115373 | 9267  | 12 | 0 | 2  | Low-quality | 5.09 |
| Sample_T2B_k141_11504   | 5339  | 3  | 0 | 0  | Low-quality | 5.09 |
| Sample_T2C_k141_250546  | 7566  | 8  | 1 | 2  | Low-quality | 5.09 |
| Sample_T5B_k141_77755   | 38719 | 33 | 3 | 13 | Low-quality | 5.09 |
| Sample_T3B_k141_135419  | 5231  | 5  | 2 | 1  | Low-quality | 5.09 |
| Sample_C11A_k141_56480  | 9361  | 13 | 1 | 0  | Low-quality | 5.08 |
| Sample_C2A_k141_32557   | 8389  | 14 | 2 | 2  | Low-quality | 5.08 |
| Sample_C7B_k141_66104   | 6028  | 8  | 0 | 1  | Low-quality | 5.08 |
| Sample_T11B_k141_52208  | 7672  | 10 | 0 | 9  | Low-quality | 5.08 |
| Sample_C1C_k141_143582  | 14209 | 16 | 4 | 0  | Low-quality | 5.08 |
| Sample_C11A_k141_170528 | 10931 | 14 | 1 | 2  | Low-quality | 5.07 |
| Sample_C9C_k141_82222   | 7840  | 11 | 1 | 1  | Low-quality | 5.07 |
| Sample_T11A_k141_48628  | 7804  | 7  | 0 | 7  | Low-quality | 5.07 |
| Sample_T7A_k141_115292  | 17442 | 18 | 0 | 15 | Low-quality | 5.07 |
| Sample_C2A_k141_131494  | 6354  | 6  | 4 | 0  | Low-quality | 5.07 |
| Sample_T12C_k141_145262 | 9130  | 15 | 0 | 0  | Low-quality | 5.07 |
| Sample_T7C_k141_16687   | 6725  | 7  | 1 | 0  | Low-quality | 5.07 |
| Sample_C10C_k141_177214 | 12455 | 16 | 1 | 0  | Low-quality | 5.06 |
| Sample_T5C_k141_83567   | 8053  | 11 | 1 | 1  | Low-quality | 5.06 |
| Sample_T8B_k141_14599   | 7180  | 8  | 1 | 1  | Low-quality | 5.06 |
| Sample_C10B_k141_30386  | 15797 | 15 | 0 | 10 | Low-quality | 5.05 |
| Sample_C4B_k141_201591  | 10147 | 16 | 2 | 2  | Low-quality | 5.05 |
| Sample_T4A_k141_32960   | 5107  | 5  | 0 | 3  | Low-quality | 5.05 |
| Sample_T13C_k141_33720  | 7928  | 10 | 2 | 0  | Low-quality | 5.05 |
| Sample_T2A_k141_177704  | 6669  | 5  | 0 | 2  | Low-quality | 5.04 |
| Sample_T4B_k141_142980  | 15689 | 12 | 0 | 5  | Low-quality | 5.04 |
| Sample_C11B_k141_195618 | 12191 | 11 | 0 | 7  | Low-quality | 5.03 |
| Sample_C1C_k141_164189  | 9060  | 7  | 0 | 5  | Low-quality | 5.03 |
| Sample_T14B_k141_113716 | 7905  | 13 | 2 | 0  | Low-quality | 5.03 |
| Sample_C1C_k141_66975   | 9723  | 10 | 0 | 6  | Low-quality | 5.02 |
| Sample_C3C_k141_103934  | 7576  | 19 | 0 | 0  | Low-quality | 5.02 |
| Sample_C4C_k141_147400  | 5459  | 4  | 0 | 3  | Low-quality | 5.02 |
| Sample_C9A_k141_40220   | 10031 | 16 | 2 | 3  | Low-quality | 5.02 |
| Sample_T7A_k141_214706  | 5048  | 10 | 2 | 1  | Low-quality | 5.02 |
| Sample_C2C_k141_247517  | 8263  | 7  | 1 | 2  | Low-quality | 5.01 |
| Sample_T10B_k141_169496 | 7931  | 10 | 1 | 0  | Low-quality | 5.01 |
| Sample_T12B_k141_138572 | 5288  | 7  | 1 | 1  | Low-quality | 5.01 |



|                         |       |    |   |    |             |      |
|-------------------------|-------|----|---|----|-------------|------|
| Sample_T14B_k141_164289 | 5138  | 4  | 1 | 1  | Low-quality | 5.01 |
| Sample_T15C_k141_79037  | 6951  | 10 | 1 | 1  | Low-quality | 5.01 |
| Sample_T16B_k141_114778 | 5913  | 13 | 6 | 2  | Low-quality | 5.01 |
| Sample_C7C_k141_81360   | 7200  | 4  | 0 | 3  | Low-quality | 5    |
| Sample_T4B_k141_80497   | 5330  | 4  | 0 | 3  | Low-quality | 5    |
| Sample_C2A_k141_28996   | 6292  | 8  | 7 | 0  | Low-quality | 5    |
| Sample_C5C_k141_14130   | 6582  | 14 | 2 | 0  | Low-quality | 5    |
| Sample_T16C_k141_44026  | 7232  | 13 | 5 | 0  | Low-quality | 5    |
| Sample_T2B_k141_62478   | 9962  | 9  | 0 | 7  | Low-quality | 4.99 |
| Sample_T2C_k141_54296   | 7103  | 7  | 0 | 2  | Low-quality | 4.99 |
| Sample_T8A_k141_218692  | 18194 | 22 | 1 | 4  | Low-quality | 4.99 |
| Sample_C1B_k141_37330   | 5702  | 6  | 0 | 0  | Low-quality | 4.99 |
| Sample_C7A_k141_62226   | 8168  | 9  | 1 | 0  | Low-quality | 4.99 |
| Sample_T12A_k141_298566 | 9170  | 5  | 0 | 1  | Low-quality | 4.99 |
| Sample_T8B_k141_197838  | 7708  | 10 | 0 | 0  | Low-quality | 4.99 |
| Sample_C2C_k141_36035   | 9603  | 9  | 0 | 4  | Low-quality | 4.98 |
| Sample_C4C_k141_4039    | 10156 | 10 | 1 | 2  | Low-quality | 4.98 |
| Sample_C8C_k141_32349   | 5073  | 6  | 0 | 4  | Low-quality | 4.98 |
| Sample_T13A_k141_42700  | 19258 | 9  | 0 | 7  | Low-quality | 4.98 |
| Sample_C1C_k141_50145   | 6070  | 8  | 1 | 3  | Low-quality | 4.98 |
| Sample_C5A_k141_163747  | 8314  | 14 | 6 | 0  | Low-quality | 4.98 |
| Sample_C12C_k141_4753   | 9561  | 12 | 0 | 11 | Low-quality | 4.97 |
| Sample_C8C_k141_93247   | 8430  | 8  | 1 | 2  | Low-quality | 4.97 |
| Sample_T6A_k141_34802   | 7297  | 4  | 0 | 4  | Low-quality | 4.97 |
| Sample_C9A_k141_76016   | 10718 | 8  | 2 | 0  | Low-quality | 4.97 |
| Sample_C2C_k141_181642  | 8179  | 14 | 2 | 1  | Low-quality | 4.96 |
| Sample_C6C_k141_198299  | 5163  | 6  | 0 | 2  | Low-quality | 4.96 |
| Sample_T11A_k141_150156 | 6656  | 4  | 0 | 4  | Low-quality | 4.96 |
| Sample_T15A_k141_148149 | 5050  | 4  | 0 | 1  | Low-quality | 4.96 |
| Sample_C1B_k141_10437   | 12976 | 15 | 1 | 2  | Low-quality | 4.95 |
| Sample_C8B_k141_121146  | 6358  | 6  | 0 | 1  | Low-quality | 4.95 |
| Sample_T4C_k141_44364   | 12023 | 14 | 1 | 5  | Low-quality | 4.95 |
| Sample_C4B_k141_190773  | 8962  | 10 | 3 | 1  | Low-quality | 4.95 |
| Sample_T11B_k141_330    | 9871  | 10 | 1 | 2  | Low-quality | 4.94 |
| Sample_T10B_k141_110258 | 6562  | 9  | 2 | 0  | Low-quality | 4.94 |
| Sample_C11B_k141_16009  | 8608  | 14 | 1 | 7  | Low-quality | 4.93 |
| Sample_C3A_k141_170279  | 15619 | 12 | 0 | 9  | Low-quality | 4.93 |
| Sample_T1C_k141_56687   | 6529  | 5  | 0 | 3  | Low-quality | 4.93 |
| Sample_T3A_k141_72839   | 8610  | 8  | 0 | 8  | Low-quality | 4.93 |

|                         |       |    |   |    |             |      |
|-------------------------|-------|----|---|----|-------------|------|
| Sample_T16B_k141_89676  | 5514  | 6  | 2 | 0  | Low-quality | 4.93 |
| Sample_T6A_k141_241901  | 7264  | 14 | 2 | 0  | Low-quality | 4.93 |
| Sample_C6A_k141_70421   | 6505  | 7  | 0 | 2  | Low-quality | 4.92 |
| Sample_T3A_k141_100217  | 6322  | 2  | 1 | 1  | Low-quality | 4.92 |
| Sample_T4B_k141_368332  | 6882  | 6  | 0 | 3  | Low-quality | 4.92 |
| Sample_T2B_k141_254994  | 7323  | 9  | 1 | 0  | Low-quality | 4.92 |
| Sample_T6A_k141_190643  | 6988  | 9  | 4 | 0  | Low-quality | 4.92 |
| Sample_C10C_k141_34277  | 6526  | 4  | 0 | 3  | Low-quality | 4.91 |
| Sample_T12B_k141_118634 | 7910  | 15 | 1 | 0  | Low-quality | 4.91 |
| Sample_T2C_k141_45384   | 6538  | 14 | 0 | 1  | Low-quality | 4.91 |
| Sample_T12C_k141_84296  | 7405  | 7  | 3 | 0  | Low-quality | 4.91 |
| Sample_C6A_k141_72673   | 7242  | 10 | 1 | 0  | Low-quality | 4.9  |
| Sample_C2C_k141_115823  | 5176  | 12 | 1 | 0  | Low-quality | 4.9  |
| Sample_C5A_k141_167315  | 8743  | 10 | 1 | 1  | Low-quality | 4.9  |
| Sample_C8C_k141_26799   | 6265  | 10 | 1 | 0  | Low-quality | 4.9  |
| Sample_T14A_k141_16830  | 7700  | 3  | 0 | 0  | Low-quality | 4.89 |
| Sample_C2C_k141_237179  | 9985  | 6  | 1 | 5  | Low-quality | 4.88 |
| Sample_T4B_k141_274493  | 10331 | 6  | 0 | 6  | Low-quality | 4.88 |
| Sample_C5A_k141_256944  | 22697 | 15 | 1 | 4  | Low-quality | 4.87 |
| Sample_C7B_k141_60774   | 13673 | 15 | 1 | 2  | Low-quality | 4.87 |
| Sample_T2B_k141_240426  | 6793  | 3  | 2 | 0  | Low-quality | 4.87 |
| Sample_T4B_k141_160528  | 7026  | 9  | 0 | 2  | Low-quality | 4.87 |
| Sample_T5C_k141_70640   | 5939  | 11 | 0 | 0  | Low-quality | 4.87 |
| Sample_T6C_k141_169328  | 5016  | 5  | 1 | 1  | Low-quality | 4.87 |
| Sample_T4B_k141_140448  | 5192  | 9  | 1 | 0  | Low-quality | 4.87 |
| Sample_T10B_k141_64143  | 40184 | 36 | 2 | 18 | Low-quality | 4.86 |
| Sample_T4B_k141_156068  | 5757  | 7  | 0 | 3  | Low-quality | 4.86 |
| Sample_T7B_k141_45726   | 12161 | 9  | 0 | 0  | Low-quality | 4.86 |
| Sample_C2A_k141_320256  | 11847 | 6  | 1 | 1  | Low-quality | 4.86 |
| Sample_C3C_k141_220821  | 6744  | 10 | 1 | 2  | Low-quality | 4.86 |
| Sample_C8A_k141_41853   | 18798 | 19 | 1 | 2  | Low-quality | 4.86 |
| Sample_C8B_k141_108728  | 8732  | 7  | 1 | 0  | Low-quality | 4.86 |
| Sample_C12A_k141_90826  | 5986  | 4  | 0 | 2  | Low-quality | 4.85 |
| Sample_C14C_k141_132936 | 5265  | 4  | 0 | 1  | Low-quality | 4.85 |
| Sample_C4A_k141_121880  | 6289  | 3  | 0 | 3  | Low-quality | 4.84 |
| Sample_T7A_k141_225270  | 12201 | 14 | 1 | 4  | Low-quality | 4.84 |
| Sample_C12A_k141_197083 | 7675  | 11 | 1 | 1  | Low-quality | 4.83 |
| Sample_C5A_k141_263643  | 9689  | 8  | 1 | 6  | Low-quality | 4.83 |
| Sample_T11C_k141_84192  | 6968  | 4  | 0 | 3  | Low-quality | 4.83 |

|                                    |       |    |   |    |             |      |
|------------------------------------|-------|----|---|----|-------------|------|
| Sample_T14B_k141_168203            | 8231  | 15 | 0 | 1  | Low-quality | 4.83 |
| Sample_T16C_k141_144131            | 6640  | 7  | 0 | 6  | Low-quality | 4.83 |
| Sample_T2A_k141_26430              | 18245 | 13 | 0 | 9  | Low-quality | 4.83 |
| Sample_T4B_k141_200343             | 9486  | 11 | 0 | 9  | Low-quality | 4.83 |
| Sample_C4B_k141_59057              | 10118 | 11 | 2 | 3  | Low-quality | 4.83 |
| Sample_C6C_k141_84103              | 6051  | 6  | 0 | 4  | Low-quality | 4.82 |
| Sample_T10A_k141_137741            | 9763  | 7  | 0 | 7  | Low-quality | 4.81 |
| Sample_C11A_k141_33414             | 8534  | 11 | 2 | 0  | Low-quality | 4.81 |
| Sample_T8A_k141_29476              | 5416  | 7  | 1 | 0  | Low-quality | 4.81 |
| Sample_C5A_k141_55388              | 44079 | 45 | 2 | 29 | Low-quality | 4.8  |
| Sample_T5A_k141_21260              | 9154  | 7  | 1 | 1  | Low-quality | 4.8  |
| Sample_C2A_k141_73669              | 5360  | 12 | 1 | 0  | Low-quality | 4.8  |
| Sample_T6A_k141_156378             | 6698  | 13 | 1 | 0  | Low-quality | 4.8  |
| Sample_T12A_k141_44442             | 13185 | 10 | 1 | 9  | Low-quality | 4.79 |
| Sample_T13C_k141_65697             | 5816  | 3  | 0 | 2  | Low-quality | 4.79 |
| Sample_T16B_k141_156270            | 6238  | 7  | 0 | 3  | Low-quality | 4.79 |
| Sample_T11B_k141_144021            | 7107  | 12 | 1 | 0  | Low-quality | 4.78 |
| Sample_C12A_k141_71464             | 8480  | 7  | 0 | 3  | Low-quality | 4.77 |
| Sample_C6A_k141_34074              | 8322  | 8  | 0 | 5  | Low-quality | 4.77 |
| Sample_T11C_k141_86406             | 7514  | 7  | 0 | 3  | Low-quality | 4.77 |
| Sample_T12A_k141_23940             | 9135  | 13 | 0 | 10 | Low-quality | 4.77 |
| Sample_T12C_k141_25653             | 7917  | 7  | 0 | 1  | Low-quality | 4.77 |
| Sample_T3A_k141_26624              | 7557  | 9  | 1 | 0  | Low-quality | 4.77 |
| Sample_C14C_k141_60642             | 19027 | 17 | 0 | 13 | Low-quality | 4.76 |
| Sample_C1B_k141_170473             | 8841  | 3  | 0 | 0  | Low-quality | 4.76 |
| Sample_C1B_k141_212325             | 15559 | 12 | 0 | 8  | Low-quality | 4.76 |
| Sample_T4C_k141_34881              | 5126  | 4  | 0 | 2  | Low-quality | 4.76 |
| Sample_T6A_k141_19976              | 13382 | 12 | 1 | 1  | Low-quality | 4.76 |
| Sample_C11C_k141_78570             | 8005  | 11 | 1 | 0  | Low-quality | 4.76 |
| Sample_C1B_k141_114474             | 10257 | 28 | 0 | 0  | Low-quality | 4.76 |
| Sample_C4C_k141_43150              | 6651  | 13 | 1 | 0  | Low-quality | 4.76 |
| Sample_T11B_k141_162440_fragment_1 | 13642 | 11 | 1 | 3  | Low-quality | 4.76 |
| Sample_C5A_k141_63912              | 10244 | 31 | 0 | 2  | Low-quality | 4.75 |
| Sample_T12A_k141_10251             | 8579  | 22 | 0 | 0  | Low-quality | 4.75 |
| Sample_T10A_k141_101876            | 6331  | 11 | 0 | 0  | Low-quality | 4.74 |
| Sample_T15C_k141_16418             | 17301 | 14 | 1 | 4  | Low-quality | 4.74 |
| Sample_T2A_k141_70520              | 8878  | 10 | 0 | 8  | Low-quality | 4.74 |
| Sample_C14C_k141_68435             | 6345  | 14 | 0 | 0  | Low-quality | 4.74 |
| Sample_C11B_k141_98996             | 6839  | 13 | 2 | 0  | Low-quality | 4.73 |

|                                   |       |    |   |    |             |      |
|-----------------------------------|-------|----|---|----|-------------|------|
| Sample_T2B_k141_23568             | 6800  | 11 | 0 | 2  | Low-quality | 4.73 |
| Sample_T7C_k141_144755            | 6392  | 10 | 1 | 1  | Low-quality | 4.73 |
| Sample_C7B_k141_79271             | 5451  | 7  | 0 | 5  | Low-quality | 4.72 |
| Sample_T11C_k141_1411             | 9337  | 6  | 0 | 5  | Low-quality | 4.72 |
| Sample_T6A_k141_64633             | 6406  | 10 | 0 | 1  | Low-quality | 4.72 |
| Sample_C1B_k141_101430            | 5185  | 4  | 1 | 0  | Low-quality | 4.72 |
| Sample_T10B_k141_128500           | 6923  | 9  | 0 | 0  | Low-quality | 4.72 |
| Sample_T11B_k141_45149            | 6447  | 6  | 3 | 0  | Low-quality | 4.72 |
| Sample_C1B_k141_89879             | 7002  | 8  | 1 | 0  | Low-quality | 4.71 |
| Sample_C4A_k141_69042             | 17818 | 13 | 0 | 12 | Low-quality | 4.71 |
| Sample_C9A_k141_3791              | 8324  | 6  | 4 | 0  | Low-quality | 4.71 |
| Sample_C6C_k141_30119             | 9266  | 8  | 0 | 4  | Low-quality | 4.7  |
| Sample_C2B_k141_52283             | 5618  | 6  | 0 | 3  | Low-quality | 4.7  |
| Sample_C1C_k141_51984             | 7383  | 10 | 1 | 0  | Low-quality | 4.68 |
| Sample_C4A_k141_145098            | 7663  | 4  | 1 | 0  | Low-quality | 4.68 |
| Sample_C6A_k141_62352             | 8600  | 7  | 0 | 4  | Low-quality | 4.68 |
| Sample_T1B_k141_5213              | 28350 | 24 | 2 | 13 | Low-quality | 4.68 |
| Sample_C13A_k141_105164           | 6498  | 9  | 4 | 0  | Low-quality | 4.68 |
| Sample_C4B_k141_263145_fragment_1 | 6643  | 9  | 0 | 0  | Low-quality | 4.68 |
| Sample_C3B_k141_103999            | 6891  | 3  | 0 | 0  | Low-quality | 4.67 |
| Sample_T2C_k141_242723            | 7796  | 16 | 1 | 1  | Low-quality | 4.67 |
| Sample_T5C_k141_82882             | 5807  | 16 | 0 | 1  | Low-quality | 4.67 |
| Sample_C14A_k141_169244           | 8533  | 8  | 0 | 3  | Low-quality | 4.66 |
| Sample_T10A_k141_43083            | 5378  | 5  | 0 | 2  | Low-quality | 4.66 |
| Sample_C1B_k141_247131            | 8493  | 9  | 2 | 0  | Low-quality | 4.66 |
| Sample_C5A_k141_230663            | 5319  | 8  | 2 | 0  | Low-quality | 4.66 |
| Sample_T18B_k141_126272           | 7140  | 10 | 1 | 0  | Low-quality | 4.66 |
| Sample_C10A_k141_118316           | 6010  | 5  | 0 | 4  | Low-quality | 4.65 |
| Sample_C11B_k141_153551           | 8041  | 8  | 0 | 8  | Low-quality | 4.65 |
| Sample_C4C_k141_4228              | 5030  | 5  | 0 | 2  | Low-quality | 4.65 |
| Sample_T10B_k141_7307             | 5739  | 4  | 0 | 2  | Low-quality | 4.65 |
| Sample_T11B_k141_137594           | 5963  | 5  | 0 | 3  | Low-quality | 4.65 |
| Sample_T16B_k141_89776            | 18267 | 13 | 0 | 8  | Low-quality | 4.65 |
| Sample_T2B_k141_88943             | 5023  | 4  | 0 | 1  | Low-quality | 4.65 |
| Sample_C9C_k141_58451             | 7403  | 9  | 1 | 1  | Low-quality | 4.65 |
| Sample_C6C_k141_65928             | 6691  | 4  | 0 | 3  | Low-quality | 4.64 |
| Sample_T12A_k141_139305           | 5043  | 2  | 0 | 0  | Low-quality | 4.64 |
| Sample_C7B_k141_162929            | 6068  | 7  | 0 | 0  | Low-quality | 4.64 |
| Sample_C11C_k141_76724            | 5469  | 11 | 0 | 0  | Low-quality | 4.63 |

|                         |        |    |   |    |             |      |
|-------------------------|--------|----|---|----|-------------|------|
| Sample_C5C_k141_5093    | 5109   | 5  | 0 | 4  | Low-quality | 4.63 |
| Sample_T12B_k141_175052 | 5424   | 6  | 1 | 1  | Low-quality | 4.63 |
| Sample_T16C_k141_113711 | 11109  | 9  | 2 | 2  | Low-quality | 4.63 |
| Sample_T4C_k141_106742  | 8085   | 5  | 0 | 5  | Low-quality | 4.63 |
| Sample_T7C_k141_35955   | 12847  | 17 | 1 | 6  | Low-quality | 4.63 |
| Sample_C3B_k141_173497  | 7159   | 8  | 1 | 0  | Low-quality | 4.63 |
| Sample_C4A_k141_137047  | 8429   | 16 | 1 | 0  | Low-quality | 4.63 |
| Sample_T12A_k141_203302 | 6429   | 9  | 0 | 0  | Low-quality | 4.63 |
| Sample_T5C_k141_178052  | 7311   | 12 | 1 | 0  | Low-quality | 4.63 |
| Sample_C10B_k141_136740 | 8057   | 10 | 0 | 6  | Low-quality | 4.62 |
| Sample_C1A_k141_68035   | 8066   | 9  | 0 | 7  | Low-quality | 4.62 |
| Sample_T13B_k141_10045  | 7371   | 8  | 1 | 0  | Low-quality | 4.62 |
| Sample_T5B_k141_1121    | 5839   | 7  | 0 | 4  | Low-quality | 4.62 |
| Sample_T5C_k141_157524  | 7761   | 12 | 1 | 0  | Low-quality | 4.62 |
| Sample_T8C_k141_183032  | 8524   | 8  | 1 | 2  | Low-quality | 4.62 |
| Sample_C14C_k141_183450 | 9105   | 19 | 2 | 0  | Low-quality | 4.62 |
| Sample_C5A_k141_145242  | 5858   | 6  | 1 | 2  | Low-quality | 4.61 |
| Sample_T14A_k141_121534 | 12897  | 16 | 1 | 2  | Low-quality | 4.61 |
| Sample_T7B_k141_6227    | 15198  | 13 | 0 | 5  | Low-quality | 4.61 |
| Sample_C14A_k141_80158  | 5894   | 4  | 1 | 0  | Low-quality | 4.61 |
| Sample_C8B_k141_69846   | 8931   | 11 | 1 | 0  | Low-quality | 4.61 |
| Sample_T12B_k141_100268 | 6583   | 12 | 0 | 0  | Low-quality | 4.61 |
| Sample_T16B_k141_79928  | 6670   | 9  | 1 | 0  | Low-quality | 4.61 |
| Sample_T2B_k141_143487  | 5975   | 7  | 0 | 1  | Low-quality | 4.61 |
| Sample_C9A_k141_117308  | 9920   | 29 | 0 | 0  | Low-quality | 4.6  |
| Sample_T5C_k141_52245   | 7774   | 9  | 1 | 1  | Low-quality | 4.6  |
| Sample_T4C_k141_67782   | 10064  | 16 | 4 | 2  | Low-quality | 4.6  |
| Sample_T8B_k141_210340  | 7441   | 10 | 0 | 0  | Low-quality | 4.6  |
| Sample_C2A_k141_228941  | 8959   | 10 | 0 | 7  | Low-quality | 4.59 |
| Sample_C5A_k141_189546  | 11368  | 11 | 1 | 1  | Low-quality | 4.59 |
| Sample_C7C_k141_103002  | 5514   | 3  | 0 | 3  | Low-quality | 4.59 |
| Sample_C9A_k141_56791   | 9884   | 16 | 1 | 0  | Low-quality | 4.59 |
| Sample_T2B_k141_104298  | 6157   | 2  | 1 | 0  | Low-quality | 4.59 |
| Sample_T2B_k141_125223  | 6654   | 3  | 0 | 3  | Low-quality | 4.59 |
| Sample_T2C_k141_8300    | 129239 | 94 | 2 | 51 | Low-quality | 4.59 |
| Sample_T18B_k141_21109  | 7415   | 12 | 5 | 0  | Low-quality | 4.59 |
| Sample_T7C_k141_150291  | 6401   | 15 | 1 | 0  | Low-quality | 4.59 |
| Sample_C4A_k141_38283   | 18187  | 19 | 0 | 13 | Low-quality | 4.58 |
| Sample_C7B_k141_63530   | 5424   | 7  | 0 | 0  | Low-quality | 4.58 |

|                                    |       |    |   |    |             |      |
|------------------------------------|-------|----|---|----|-------------|------|
| Sample_T15B_k141_139865            | 6601  | 12 | 0 | 1  | Low-quality | 4.57 |
| Sample_C12C_k141_47087_fragment_1  | 8705  | 8  | 0 | 4  | Low-quality | 4.57 |
| Sample_T17B_k141_13728             | 8251  | 8  | 0 | 3  | Low-quality | 4.56 |
| Sample_C1C_k141_88118_fragment_1   | 12795 | 15 | 2 | 2  | Low-quality | 4.56 |
| Sample_T10A_k141_121885_fragment_2 | 14017 | 11 | 1 | 4  | Low-quality | 4.56 |
| Sample_T15A_k141_104587            | 16306 | 18 | 1 | 5  | Low-quality | 4.55 |
| Sample_T17B_k141_31941             | 7939  | 11 | 0 | 10 | Low-quality | 4.55 |
| Sample_T6A_k141_235829             | 6451  | 13 | 1 | 1  | Low-quality | 4.55 |
| Sample_C5C_k141_16818              | 8112  | 12 | 1 | 0  | Low-quality | 4.54 |
| Sample_T5A_k141_37643              | 7931  | 7  | 0 | 1  | Low-quality | 4.54 |
| Sample_C2C_k141_70293              | 9778  | 8  | 1 | 1  | Low-quality | 4.54 |
| Sample_T4C_k141_48237              | 10794 | 8  | 0 | 8  | Low-quality | 4.53 |
| Sample_C5A_k141_106327             | 5143  | 5  | 2 | 1  | Low-quality | 4.53 |
| Sample_C7C_k141_99874              | 5319  | 5  | 0 | 0  | Low-quality | 4.53 |
| Sample_C3B_k141_31889              | 8342  | 12 | 1 | 1  | Low-quality | 4.52 |
| Sample_T11C_k141_57147             | 11864 | 9  | 1 | 3  | Low-quality | 4.52 |
| Sample_T8B_k141_157238             | 6339  | 9  | 1 | 2  | Low-quality | 4.52 |
| Sample_C3B_k141_118491             | 6978  | 11 | 1 | 0  | Low-quality | 4.52 |
| Sample_T2A_k141_85291              | 6124  | 8  | 0 | 4  | Low-quality | 4.51 |
| Sample_T14B_k141_94973             | 5748  | 6  | 0 | 1  | Low-quality | 4.51 |
| Sample_T13A_k141_112681            | 6342  | 9  | 0 | 3  | Low-quality | 4.5  |
| Sample_C11B_k141_233130            | 6511  | 10 | 1 | 0  | Low-quality | 4.5  |
| Sample_C8C_k141_72978              | 6723  | 14 | 0 | 0  | Low-quality | 4.5  |
| Sample_T13B_k141_167377            | 5009  | 9  | 1 | 0  | Low-quality | 4.5  |
| Sample_T6A_k141_122868             | 6310  | 5  | 2 | 0  | Low-quality | 4.5  |
| Sample_C3A_k141_122807             | 7840  | 8  | 0 | 7  | Low-quality | 4.49 |
| Sample_C6C_k141_110943             | 9576  | 10 | 0 | 9  | Low-quality | 4.49 |
| Sample_C11A_k141_166329            | 6241  | 13 | 5 | 2  | Low-quality | 4.49 |
| Sample_C6C_k141_67169              | 52923 | 52 | 1 | 11 | Low-quality | 4.48 |
| Sample_T8B_k141_70161              | 18150 | 20 | 2 | 15 | Low-quality | 4.48 |
| Sample_T14A_k141_73643             | 5394  | 5  | 0 | 3  | Low-quality | 4.47 |
| Sample_T8A_k141_58721              | 7115  | 6  | 1 | 0  | Low-quality | 4.47 |
| Sample_C2B_k141_47156              | 7517  | 8  | 0 | 8  | Low-quality | 4.46 |
| Sample_T11A_k141_97157             | 5285  | 6  | 0 | 2  | Low-quality | 4.46 |
| Sample_T13C_k141_87861             | 5795  | 4  | 0 | 2  | Low-quality | 4.46 |
| Sample_T16B_k141_6649              | 5006  | 4  | 0 | 3  | Low-quality | 4.46 |
| Sample_T17C_k141_34609             | 14869 | 8  | 0 | 7  | Low-quality | 4.46 |
| Sample_T8A_k141_93747              | 9075  | 7  | 0 | 7  | Low-quality | 4.46 |
| Sample_C3A_k141_178110             | 8557  | 3  | 1 | 1  | Low-quality | 4.45 |

|                         |       |    |   |    |             |      |
|-------------------------|-------|----|---|----|-------------|------|
| Sample_C5A_k141_82623   | 5745  | 8  | 0 | 2  | Low-quality | 4.45 |
| Sample_C6C_k141_202956  | 9262  | 10 | 0 | 8  | Low-quality | 4.45 |
| Sample_T12A_k141_338250 | 9416  | 4  | 0 | 2  | Low-quality | 4.45 |
| Sample_T6A_k141_250733  | 13345 | 8  | 0 | 8  | Low-quality | 4.45 |
| Sample_T6A_k141_47632   | 9238  | 9  | 1 | 1  | Low-quality | 4.45 |
| Sample_T8A_k141_221060  | 6132  | 7  | 0 | 3  | Low-quality | 4.45 |
| Sample_C5A_k141_63262   | 6196  | 8  | 1 | 1  | Low-quality | 4.45 |
| Sample_T7A_k141_200871  | 6583  | 7  | 0 | 2  | Low-quality | 4.45 |
| Sample_C4B_k141_215856  | 6452  | 10 | 8 | 0  | Low-quality | 4.44 |
| Sample_T12B_k141_63148  | 7452  | 6  | 4 | 0  | Low-quality | 4.44 |
| Sample_T13A_k141_112242 | 6414  | 8  | 0 | 2  | Low-quality | 4.44 |
| Sample_T13B_k141_122578 | 7542  | 15 | 4 | 0  | Low-quality | 4.44 |
| Sample_C10C_k141_29460  | 10412 | 9  | 0 | 9  | Low-quality | 4.43 |
| Sample_C10A_k141_185871 | 7709  | 7  | 0 | 5  | Low-quality | 4.42 |
| Sample_C10C_k141_222190 | 7824  | 13 | 1 | 2  | Low-quality | 4.42 |
| Sample_T7A_k141_93271   | 8868  | 11 | 0 | 5  | Low-quality | 4.42 |
| Sample_C4C_k141_237857  | 6598  | 7  | 1 | 0  | Low-quality | 4.42 |
| Sample_C9B_k141_103905  | 5537  | 9  | 3 | 0  | Low-quality | 4.42 |
| Sample_T10B_k141_93312  | 5158  | 6  | 1 | 1  | Low-quality | 4.42 |
| Sample_C14B_k141_97154  | 5272  | 6  | 1 | 1  | Low-quality | 4.41 |
| Sample_C9C_k141_34654   | 6672  | 5  | 1 | 1  | Low-quality | 4.41 |
| Sample_T5C_k141_139262  | 6087  | 6  | 1 | 1  | Low-quality | 4.41 |
| Sample_C4A_k141_211017  | 5084  | 3  | 1 | 0  | Low-quality | 4.4  |
| Sample_T16C_k141_10645  | 6209  | 6  | 1 | 1  | Low-quality | 4.4  |
| Sample_C5C_k141_50694   | 6197  | 10 | 0 | 7  | Low-quality | 4.39 |
| Sample_C8C_k141_76245   | 8156  | 9  | 2 | 2  | Low-quality | 4.39 |
| Sample_T11B_k141_42427  | 7696  | 7  | 0 | 7  | Low-quality | 4.39 |
| Sample_C4C_k141_7667    | 7143  | 7  | 1 | 0  | Low-quality | 4.39 |
| Sample_C9A_k141_54653   | 15236 | 13 | 0 | 13 | Low-quality | 4.38 |
| Sample_T16B_k141_93000  | 16054 | 15 | 0 | 15 | Low-quality | 4.38 |
| Sample_T4A_k141_93261   | 9024  | 9  | 0 | 8  | Low-quality | 4.38 |
| Sample_T6A_k141_49051   | 7801  | 8  | 0 | 4  | Low-quality | 4.38 |
| Sample_C2A_k141_117484  | 10164 | 11 | 1 | 1  | Low-quality | 4.38 |
| Sample_T6A_k141_204876  | 7310  | 14 | 4 | 1  | Low-quality | 4.38 |
| Sample_T15B_k141_58174  | 6321  | 11 | 2 | 0  | Low-quality | 4.37 |
| Sample_T5C_k141_60305   | 5450  | 9  | 1 | 2  | Low-quality | 4.37 |
| Sample_T8B_k141_212577  | 7550  | 17 | 2 | 0  | Low-quality | 4.37 |
| Sample_C7A_k141_54249   | 5761  | 5  | 0 | 3  | Low-quality | 4.36 |
| Sample_T12A_k141_139863 | 7840  | 6  | 0 | 6  | Low-quality | 4.36 |

|                         |       |    |   |    |             |      |
|-------------------------|-------|----|---|----|-------------|------|
| Sample_T3A_k141_8805    | 5888  | 10 | 0 | 3  | Low-quality | 4.36 |
| Sample_C1C_k141_133544  | 7176  | 7  | 3 | 0  | Low-quality | 4.36 |
| Sample_C2A_k141_68428   | 5113  | 4  | 0 | 0  | Low-quality | 4.36 |
| Sample_C12A_k141_136166 | 5684  | 5  | 0 | 2  | Low-quality | 4.35 |
| Sample_T16C_k141_20482  | 6751  | 17 | 0 | 0  | Low-quality | 4.35 |
| Sample_C2A_k141_171194  | 6543  | 7  | 1 | 2  | Low-quality | 4.35 |
| Sample_T10B_k141_25840  | 7678  | 5  | 0 | 2  | Low-quality | 4.34 |
| Sample_C1C_k141_76996   | 6483  | 8  | 0 | 0  | Low-quality | 4.34 |
| Sample_T3C_k141_100321  | 6061  | 6  | 2 | 0  | Low-quality | 4.34 |
| Sample_T7B_k141_148968  | 8897  | 16 | 4 | 0  | Low-quality | 4.34 |
| Sample_C10A_k141_89353  | 7656  | 12 | 1 | 5  | Low-quality | 4.33 |
| Sample_C4B_k141_82708   | 9343  | 11 | 1 | 4  | Low-quality | 4.33 |
| Sample_C9B_k141_71088   | 8566  | 6  | 0 | 5  | Low-quality | 4.33 |
| Sample_C13A_k141_54984  | 7927  | 4  | 1 | 0  | Low-quality | 4.33 |
| Sample_C11A_k141_127640 | 5313  | 7  | 0 | 6  | Low-quality | 4.32 |
| Sample_C14A_k141_4171   | 5718  | 7  | 1 | 0  | Low-quality | 4.32 |
| Sample_T15B_k141_2946   | 8427  | 9  | 1 | 5  | Low-quality | 4.32 |
| Sample_C4C_k141_77584   | 6217  | 3  | 0 | 0  | Low-quality | 4.31 |
| Sample_T10A_k141_18784  | 8090  | 10 | 1 | 1  | Low-quality | 4.31 |
| Sample_T10A_k141_25159  | 5350  | 4  | 0 | 3  | Low-quality | 4.31 |
| Sample_C13A_k141_99524  | 7711  | 8  | 1 | 0  | Low-quality | 4.3  |
| Sample_T11A_k141_144162 | 12040 | 13 | 0 | 10 | Low-quality | 4.3  |
| Sample_T18C_k141_45843  | 9055  | 8  | 0 | 5  | Low-quality | 4.3  |
| Sample_T8A_k141_98979   | 8529  | 5  | 0 | 4  | Low-quality | 4.3  |
| Sample_C13B_k141_44665  | 6675  | 4  | 1 | 0  | Low-quality | 4.3  |
| Sample_C3C_k141_191923  | 6314  | 10 | 0 | 0  | Low-quality | 4.3  |
| Sample_T12A_k141_315153 | 6282  | 6  | 0 | 4  | Low-quality | 4.29 |
| Sample_T4B_k141_193530  | 5535  | 5  | 0 | 3  | Low-quality | 4.29 |
| Sample_T5A_k141_45864   | 23438 | 33 | 1 | 2  | Low-quality | 4.29 |
| Sample_C12C_k141_15272  | 6477  | 15 | 5 | 0  | Low-quality | 4.29 |
| Sample_T3B_k141_133781  | 5014  | 8  | 2 | 2  | Low-quality | 4.29 |
| Sample_T5B_k141_20267   | 5097  | 8  | 5 | 1  | Low-quality | 4.29 |
| Sample_C11B_k141_82516  | 8127  | 8  | 1 | 5  | Low-quality | 4.28 |
| Sample_T11C_k141_73103  | 5849  | 8  | 1 | 1  | Low-quality | 4.27 |
| Sample_T1C_k141_15471   | 6692  | 8  | 0 | 2  | Low-quality | 4.27 |
| Sample_T18A_k141_95099  | 5813  | 8  | 5 | 0  | Low-quality | 4.27 |
| Sample_T6A_k141_283214  | 6675  | 16 | 1 | 0  | Low-quality | 4.27 |
| Sample_C13B_k141_16962  | 9794  | 11 | 1 | 8  | Low-quality | 4.26 |
| Sample_C8C_k141_62435   | 8126  | 3  | 0 | 2  | Low-quality | 4.26 |



|                                    |       |    |   |   |             |      |
|------------------------------------|-------|----|---|---|-------------|------|
| Sample_C8C_k141_122801             | 7437  | 8  | 0 | 6 | Low-quality | 4.26 |
| Sample_T12B_k141_152418            | 7445  | 8  | 0 | 8 | Low-quality | 4.26 |
| Sample_T16C_k141_21288             | 7849  | 15 | 1 | 1 | Low-quality | 4.26 |
| Sample_T17A_k141_13730             | 8501  | 8  | 1 | 5 | Low-quality | 4.26 |
| Sample_T15A_k141_180325            | 8278  | 13 | 2 | 0 | Low-quality | 4.26 |
| Sample_C10B_k141_156413            | 10078 | 7  | 0 | 5 | Low-quality | 4.25 |
| Sample_T4C_k141_22189              | 7419  | 6  | 0 | 2 | Low-quality | 4.25 |
| Sample_T6A_k141_249769             | 6669  | 11 | 1 | 1 | Low-quality | 4.25 |
| Sample_T8B_k141_69271              | 6316  | 7  | 1 | 0 | Low-quality | 4.25 |
| Sample_C2B_k141_85945              | 5215  | 4  | 0 | 1 | Low-quality | 4.24 |
| Sample_C4B_k141_116525             | 6245  | 8  | 1 | 0 | Low-quality | 4.24 |
| Sample_T4B_k141_372018             | 5537  | 6  | 1 | 0 | Low-quality | 4.24 |
| Sample_C10C_k141_72974             | 14835 | 22 | 1 | 0 | Low-quality | 4.24 |
| Sample_C11A_k141_164138            | 7279  | 12 | 2 | 0 | Low-quality | 4.24 |
| Sample_T15B_k141_63607             | 6148  | 8  | 4 | 0 | Low-quality | 4.24 |
| Sample_C10A_k141_98728             | 6490  | 19 | 0 | 0 | Low-quality | 4.23 |
| Sample_T4B_k141_76587              | 8621  | 6  | 0 | 3 | Low-quality | 4.23 |
| Sample_T10B_k141_81519             | 6711  | 9  | 1 | 0 | Low-quality | 4.22 |
| Sample_T12A_k141_158653            | 6503  | 6  | 0 | 0 | Low-quality | 4.22 |
| Sample_T17A_k141_38261             | 5904  | 6  | 0 | 2 | Low-quality | 4.22 |
| Sample_T18C_k141_63865             | 5306  | 3  | 0 | 2 | Low-quality | 4.22 |
| Sample_T7C_k141_5164               | 5615  | 10 | 4 | 0 | Low-quality | 4.22 |
| Sample_C10C_k141_142237            | 5377  | 4  | 0 | 1 | Low-quality | 4.21 |
| Sample_T12A_k141_17438             | 5563  | 10 | 0 | 7 | Low-quality | 4.21 |
| Sample_C10C_k141_182156_fragment_1 | 8588  | 10 | 0 | 5 | Low-quality | 4.21 |
| Sample_T12C_k141_105932            | 7412  | 11 | 3 | 0 | Low-quality | 4.21 |
| Sample_T2B_k141_24146              | 5786  | 5  | 3 | 0 | Low-quality | 4.21 |
| Sample_T6A_k141_104132             | 6991  | 11 | 2 | 0 | Low-quality | 4.21 |
| Sample_C4B_k141_188597             | 16202 | 11 | 0 | 8 | Low-quality | 4.2  |
| Sample_C9C_k141_79495              | 7739  | 15 | 1 | 1 | Low-quality | 4.2  |
| Sample_C11A_k141_101372_fragment_1 | 8354  | 11 | 3 | 0 | Low-quality | 4.2  |
| Sample_C11A_k141_36399             | 7215  | 7  | 3 | 0 | Low-quality | 4.2  |
| Sample_C8B_k141_76867              | 9198  | 10 | 1 | 2 | Low-quality | 4.2  |
| Sample_T12B_k141_140938            | 6128  | 9  | 6 | 2 | Low-quality | 4.2  |
| Sample_T14A_k141_223478            | 7113  | 5  | 3 | 0 | Low-quality | 4.2  |
| Sample_T12B_k141_24541             | 6239  | 16 | 1 | 0 | Low-quality | 4.19 |
| Sample_C11C_k141_4862_fragment_4   | 8137  | 15 | 2 | 1 | Low-quality | 4.19 |
| Sample_C1C_k141_95607              | 6784  | 6  | 1 | 0 | Low-quality | 4.19 |
| Sample_C10A_k141_36246             | 8744  | 6  | 1 | 5 | Low-quality | 4.18 |

|                                   |       |    |   |    |             |      |
|-----------------------------------|-------|----|---|----|-------------|------|
| Sample_C12A_k141_214071           | 7496  | 11 | 1 | 0  | Low-quality | 4.18 |
| Sample_C12B_k141_7881             | 9008  | 14 | 1 | 1  | Low-quality | 4.18 |
| Sample_C13B_k141_24576            | 6336  | 6  | 0 | 3  | Low-quality | 4.18 |
| Sample_T16A_k141_62382            | 8368  | 11 | 1 | 3  | Low-quality | 4.18 |
| Sample_T16C_k141_62517            | 8679  | 8  | 1 | 1  | Low-quality | 4.18 |
| Sample_C12A_k141_40573            | 11973 | 9  | 0 | 4  | Low-quality | 4.18 |
| Sample_T10B_k141_78208            | 6723  | 13 | 2 | 0  | Low-quality | 4.18 |
| Sample_C1B_k141_244691            | 6848  | 6  | 0 | 3  | Low-quality | 4.17 |
| Sample_C4C_k141_169314            | 6105  | 7  | 0 | 5  | Low-quality | 4.17 |
| Sample_C9B_k141_102397_fragment_1 | 14648 | 19 | 1 | 3  | Low-quality | 4.17 |
| Sample_T11B_k141_97811            | 6604  | 10 | 1 | 0  | Low-quality | 4.17 |
| Sample_T8B_k141_217183            | 5641  | 6  | 1 | 0  | Low-quality | 4.17 |
| Sample_T4C_k141_125092            | 5130  | 3  | 0 | 2  | Low-quality | 4.16 |
| Sample_T5C_k141_149358            | 7446  | 9  | 0 | 1  | Low-quality | 4.16 |
| Sample_T14B_k141_9823             | 6317  | 11 | 0 | 0  | Low-quality | 4.16 |
| Sample_T2C_k141_6989              | 5356  | 6  | 0 | 1  | Low-quality | 4.16 |
| Sample_C12A_k141_200001           | 7390  | 7  | 0 | 4  | Low-quality | 4.15 |
| Sample_T12C_k141_45260            | 6343  | 3  | 3 | 0  | Low-quality | 4.15 |
| Sample_T13B_k141_21931            | 8986  | 9  | 1 | 0  | Low-quality | 4.15 |
| Sample_T14C_k141_38682            | 5565  | 2  | 0 | 0  | Low-quality | 4.15 |
| Sample_C14C_k141_160133           | 8269  | 8  | 2 | 1  | Low-quality | 4.14 |
| Sample_T13C_k141_64372            | 5946  | 7  | 0 | 1  | Low-quality | 4.14 |
| Sample_T17A_k141_25119            | 7380  | 9  | 0 | 0  | Low-quality | 4.14 |
| Sample_T13B_k141_21392            | 5568  | 5  | 0 | 4  | Low-quality | 4.13 |
| Sample_T2A_k141_5291              | 7214  | 5  | 0 | 3  | Low-quality | 4.13 |
| Sample_T8B_k141_33642             | 6346  | 7  | 0 | 0  | Low-quality | 4.13 |
| Sample_C11B_k141_43325            | 5673  | 10 | 2 | 1  | Low-quality | 4.13 |
| Sample_T12C_k141_160747           | 5086  | 9  | 1 | 0  | Low-quality | 4.13 |
| Sample_T2C_k141_1249              | 6642  | 21 | 2 | 0  | Low-quality | 4.13 |
| Sample_C14C_k141_78608            | 5377  | 10 | 1 | 3  | Low-quality | 4.12 |
| Sample_C9A_k141_127385            | 7180  | 5  | 1 | 0  | Low-quality | 4.12 |
| Sample_C12A_k141_60183            | 8355  | 6  | 0 | 6  | Low-quality | 4.11 |
| Sample_C6B_k141_116636            | 26527 | 29 | 2 | 14 | Low-quality | 4.11 |
| Sample_T10A_k141_130082           | 6924  | 10 | 1 | 0  | Low-quality | 4.11 |
| Sample_T10B_k141_175239           | 7172  | 8  | 0 | 4  | Low-quality | 4.11 |
| Sample_T14B_k141_183638           | 6431  | 10 | 1 | 0  | Low-quality | 4.11 |
| Sample_T4A_k141_108043            | 7830  | 7  | 0 | 4  | Low-quality | 4.11 |
| Sample_C14A_k141_90415            | 6288  | 8  | 2 | 0  | Low-quality | 4.11 |
| Sample_C14C_k141_141015           | 5726  | 6  | 0 | 0  | Low-quality | 4.11 |

|                         |       |    |   |    |             |      |
|-------------------------|-------|----|---|----|-------------|------|
| Sample_C3C_k141_20696   | 7200  | 5  | 1 | 1  | Low-quality | 4.1  |
| Sample_C9A_k141_18359   | 6322  | 6  | 0 | 4  | Low-quality | 4.1  |
| Sample_C5A_k141_170011  | 8774  | 7  | 2 | 0  | Low-quality | 4.1  |
| Sample_C8B_k141_89959   | 6576  | 4  | 2 | 0  | Low-quality | 4.1  |
| Sample_T12B_k141_69054  | 5750  | 12 | 3 | 0  | Low-quality | 4.1  |
| Sample_T5C_k141_82668   | 6530  | 7  | 0 | 0  | Low-quality | 4.1  |
| Sample_C13B_k141_40400  | 6027  | 7  | 0 | 5  | Low-quality | 4.09 |
| Sample_T11A_k141_38515  | 12770 | 7  | 0 | 5  | Low-quality | 4.09 |
| Sample_T18A_k141_96307  | 10741 | 9  | 1 | 2  | Low-quality | 4.09 |
| Sample_T3C_k141_110678  | 11606 | 9  | 0 | 7  | Low-quality | 4.09 |
| Sample_C5A_k141_62321   | 7522  | 5  | 0 | 1  | Low-quality | 4.08 |
| Sample_C7C_k141_3141    | 8799  | 13 | 1 | 3  | Low-quality | 4.08 |
| Sample_T13A_k141_81727  | 5438  | 15 | 0 | 0  | Low-quality | 4.08 |
| Sample_T6B_k141_86642   | 26045 | 34 | 3 | 12 | Low-quality | 4.08 |
| Sample_T6B_k141_154872  | 7093  | 14 | 0 | 0  | Low-quality | 4.08 |
| Sample_C4B_k141_20212   | 5535  | 6  | 4 | 0  | Low-quality | 4.08 |
| Sample_C11B_k141_54264  | 9704  | 7  | 0 | 6  | Low-quality | 4.07 |
| Sample_C9B_k141_102006  | 8215  | 14 | 0 | 1  | Low-quality | 4.07 |
| Sample_T14A_k141_59361  | 6726  | 4  | 0 | 2  | Low-quality | 4.07 |
| Sample_T16B_k141_160900 | 5098  | 3  | 0 | 0  | Low-quality | 4.07 |
| Sample_C1B_k141_8651    | 6327  | 9  | 1 | 0  | Low-quality | 4.07 |
| Sample_C3C_k141_235853  | 6549  | 20 | 3 | 0  | Low-quality | 4.07 |
| Sample_T12A_k141_130024 | 7696  | 8  | 2 | 0  | Low-quality | 4.07 |
| Sample_C1B_k141_205067  | 7546  | 7  | 1 | 3  | Low-quality | 4.06 |
| Sample_C5A_k141_4832    | 7494  | 13 | 1 | 1  | Low-quality | 4.06 |
| Sample_C11C_k141_6817   | 19889 | 25 | 2 | 4  | Low-quality | 4.06 |
| Sample_C12C_k141_87094  | 5630  | 4  | 0 | 1  | Low-quality | 4.05 |
| Sample_T12A_k141_286093 | 6250  | 5  | 0 | 0  | Low-quality | 4.05 |
| Sample_C4B_k141_263174  | 5730  | 14 | 3 | 0  | Low-quality | 4.05 |
| Sample_T1C_k141_49007   | 6907  | 9  | 1 | 0  | Low-quality | 4.05 |
| Sample_C3A_k141_99835   | 5854  | 7  | 0 | 3  | Low-quality | 4.04 |
| Sample_C11A_k141_151715 | 6887  | 10 | 3 | 0  | Low-quality | 4.04 |
| Sample_T10B_k141_15889  | 7087  | 8  | 1 | 0  | Low-quality | 4.03 |
| Sample_T13A_k141_490    | 6179  | 10 | 0 | 8  | Low-quality | 4.03 |
| Sample_T3A_k141_102850  | 6333  | 11 | 1 | 1  | Low-quality | 4.03 |
| Sample_T8B_k141_172638  | 6521  | 4  | 1 | 0  | Low-quality | 4.03 |
| Sample_C2A_k141_72172   | 5821  | 7  | 0 | 2  | Low-quality | 4.02 |
| Sample_C5A_k141_39023   | 5375  | 6  | 1 | 0  | Low-quality | 4.02 |
| Sample_C7C_k141_7069    | 7289  | 14 | 0 | 0  | Low-quality | 4.02 |

|                                   |       |    |   |   |             |      |
|-----------------------------------|-------|----|---|---|-------------|------|
| Sample_T16B_k141_78198            | 14342 | 14 | 1 | 2 | Low-quality | 4.01 |
| Sample_T4B_k141_40459             | 5800  | 7  | 0 | 3 | Low-quality | 4.01 |
| Sample_C1B_k141_41482             | 6249  | 7  | 1 | 0 | Low-quality | 4.01 |
| Sample_C10A_k141_245005           | 12110 | 15 | 0 | 7 | Low-quality | 4    |
| Sample_C1C_k141_14742             | 7882  | 6  | 0 | 3 | Low-quality | 4    |
| Sample_T15A_k141_132634           | 6975  | 6  | 0 | 5 | Low-quality | 4    |
| Sample_T3B_k141_69710             | 6462  | 10 | 0 | 0 | Low-quality | 4    |
| Sample_C8B_k141_135763            | 12875 | 9  | 0 | 8 | Low-quality | 3.99 |
| Sample_T12A_k141_162605           | 6958  | 6  | 0 | 3 | Low-quality | 3.99 |
| Sample_T17B_k141_28646            | 5278  | 8  | 1 | 1 | Low-quality | 3.99 |
| Sample_T8B_k141_232756            | 7553  | 5  | 0 | 2 | Low-quality | 3.99 |
| Sample_C5A_k141_227406            | 8607  | 12 | 2 | 0 | Low-quality | 3.99 |
| Sample_C6C_k141_197047            | 6541  | 8  | 1 | 1 | Low-quality | 3.98 |
| Sample_T10A_k141_34470            | 7328  | 6  | 0 | 1 | Low-quality | 3.98 |
| Sample_T15B_k141_33337            | 6228  | 5  | 0 | 3 | Low-quality | 3.98 |
| Sample_T4C_k141_100791            | 8042  | 5  | 0 | 4 | Low-quality | 3.98 |
| Sample_C2B_k141_236824            | 6435  | 4  | 1 | 0 | Low-quality | 3.98 |
| Sample_T16B_k141_132707           | 6047  | 7  | 0 | 1 | Low-quality | 3.98 |
| Sample_T6A_k141_228596            | 5641  | 7  | 3 | 0 | Low-quality | 3.98 |
| Sample_C6B_k141_46876             | 5329  | 4  | 0 | 2 | Low-quality | 3.97 |
| Sample_C8A_k141_61290             | 7312  | 16 | 1 | 1 | Low-quality | 3.97 |
| Sample_C9B_k141_67666             | 7985  | 8  | 0 | 4 | Low-quality | 3.97 |
| Sample_T13B_k141_12627            | 11906 | 12 | 0 | 8 | Low-quality | 3.97 |
| Sample_T7C_k141_96582             | 7994  | 8  | 1 | 5 | Low-quality | 3.97 |
| Sample_T11C_k141_69900            | 5776  | 9  | 1 | 2 | Low-quality | 3.97 |
| Sample_T10A_k141_108045           | 7935  | 5  | 0 | 3 | Low-quality | 3.96 |
| Sample_C10A_k141_330743           | 9868  | 13 | 1 | 1 | Low-quality | 3.95 |
| Sample_C6C_k141_156545            | 6888  | 6  | 0 | 4 | Low-quality | 3.95 |
| Sample_C9A_k141_69673             | 6259  | 8  | 1 | 0 | Low-quality | 3.95 |
| Sample_C12A_k141_84435            | 5157  | 5  | 0 | 3 | Low-quality | 3.94 |
| Sample_C4A_k141_240508            | 6875  | 8  | 0 | 7 | Low-quality | 3.94 |
| Sample_C4B_k141_141810            | 7854  | 10 | 0 | 3 | Low-quality | 3.94 |
| Sample_C8B_k141_88031             | 7166  | 5  | 0 | 4 | Low-quality | 3.94 |
| Sample_T3C_k141_38330             | 5602  | 2  | 0 | 2 | Low-quality | 3.94 |
| Sample_T8B_k141_99862             | 8656  | 6  | 2 | 1 | Low-quality | 3.94 |
| Sample_T17C_k141_33361_fragment_1 | 9235  | 8  | 0 | 1 | Low-quality | 3.94 |
| Sample_C3C_k141_123655            | 6522  | 10 | 1 | 0 | Low-quality | 3.93 |
| Sample_T8B_k141_139208            | 7313  | 10 | 1 | 0 | Low-quality | 3.93 |
| Sample_T8C_k141_5453              | 5605  | 4  | 0 | 4 | Low-quality | 3.93 |

|                                   |       |    |   |    |             |      |
|-----------------------------------|-------|----|---|----|-------------|------|
| Sample_C3A_k141_112851            | 5505  | 7  | 0 | 1  | Low-quality | 3.93 |
| Sample_T5C_k141_74581             | 6738  | 9  | 0 | 0  | Low-quality | 3.93 |
| Sample_T14B_k141_179811           | 5565  | 7  | 1 | 2  | Low-quality | 3.92 |
| Sample_T7A_k141_217126            | 9956  | 6  | 0 | 6  | Low-quality | 3.92 |
| Sample_T10B_k141_177460           | 6410  | 7  | 1 | 0  | Low-quality | 3.92 |
| Sample_T18B_k141_33232            | 6241  | 6  | 0 | 0  | Low-quality | 3.92 |
| Sample_T18C_k141_29166            | 5679  | 7  | 0 | 3  | Low-quality | 3.91 |
| Sample_C1B_k141_94907             | 6270  | 6  | 2 | 0  | Low-quality | 3.91 |
| Sample_C5C_k141_107675            | 7194  | 16 | 1 | 1  | Low-quality | 3.9  |
| Sample_T10C_k141_28190            | 5630  | 13 | 0 | 0  | Low-quality | 3.9  |
| Sample_T11C_k141_683              | 5939  | 9  | 0 | 7  | Low-quality | 3.9  |
| Sample_T14B_k141_3622             | 5454  | 3  | 0 | 3  | Low-quality | 3.9  |
| Sample_T3B_k141_68558             | 6857  | 12 | 3 | 0  | Low-quality | 3.9  |
| Sample_T8B_k141_18819             | 5636  | 8  | 1 | 0  | Low-quality | 3.9  |
| Sample_C2A_k141_100711            | 6498  | 7  | 0 | 3  | Low-quality | 3.89 |
| Sample_C8C_k141_15412             | 5489  | 8  | 1 | 1  | Low-quality | 3.89 |
| Sample_T13C_k141_79158            | 9275  | 10 | 1 | 3  | Low-quality | 3.89 |
| Sample_T16C_k141_5571             | 7739  | 9  | 0 | 6  | Low-quality | 3.89 |
| Sample_T8A_k141_41538             | 14786 | 16 | 1 | 4  | Low-quality | 3.89 |
| Sample_T10B_k141_68533            | 6140  | 6  | 5 | 0  | Low-quality | 3.89 |
| Sample_C10A_k141_148135           | 6773  | 7  | 0 | 3  | Low-quality | 3.88 |
| Sample_C12A_k141_196675           | 6053  | 6  | 0 | 0  | Low-quality | 3.88 |
| Sample_T11C_k141_95455            | 45783 | 48 | 1 | 18 | Low-quality | 3.88 |
| Sample_T4B_k141_238839            | 13517 | 7  | 1 | 1  | Low-quality | 3.88 |
| Sample_T6C_k141_79357             | 5109  | 7  | 1 | 1  | Low-quality | 3.88 |
| Sample_C4C_k141_260149            | 6453  | 11 | 5 | 1  | Low-quality | 3.88 |
| Sample_C8C_k141_98370             | 5861  | 8  | 2 | 1  | Low-quality | 3.88 |
| Sample_C14C_k141_186044           | 6265  | 17 | 1 | 0  | Low-quality | 3.87 |
| Sample_T15A_k141_127520           | 5868  | 10 | 0 | 7  | Low-quality | 3.87 |
| Sample_T16B_k141_70643            | 7103  | 6  | 1 | 1  | Low-quality | 3.87 |
| Sample_C14C_k141_80822            | 23293 | 26 | 0 | 23 | Low-quality | 3.86 |
| Sample_C7A_k141_127893            | 18165 | 15 | 2 | 9  | Low-quality | 3.86 |
| Sample_T8B_k141_209163            | 6150  | 7  | 1 | 0  | Low-quality | 3.86 |
| Sample_C14C_k141_81036            | 8118  | 6  | 0 | 3  | Low-quality | 3.86 |
| Sample_C7C_k141_29524             | 6795  | 20 | 1 | 0  | Low-quality | 3.86 |
| Sample_C9A_k141_125829            | 5385  | 4  | 1 | 0  | Low-quality | 3.86 |
| Sample_T12C_k141_113039           | 6225  | 8  | 1 | 0  | Low-quality | 3.86 |
| Sample_T17A_k141_8180             | 7095  | 14 | 1 | 1  | Low-quality | 3.85 |
| Sample_T14B_k141_97343_fragment_1 | 14862 | 9  | 1 | 1  | Low-quality | 3.85 |

|                         |       |    |   |    |             |      |
|-------------------------|-------|----|---|----|-------------|------|
| Sample_C10A_k141_54823  | 7730  | 6  | 1 | 4  | Low-quality | 3.84 |
| Sample_C11A_k141_37733  | 6645  | 13 | 2 | 1  | Low-quality | 3.84 |
| Sample_C14B_k141_90266  | 6419  | 11 | 3 | 0  | Low-quality | 3.84 |
| Sample_C9A_k141_68509   | 5614  | 15 | 0 | 0  | Low-quality | 3.84 |
| Sample_T8B_k141_96873   | 6212  | 16 | 1 | 0  | Low-quality | 3.84 |
| Sample_C13B_k141_104717 | 9000  | 8  | 1 | 6  | Low-quality | 3.83 |
| Sample_T13B_k141_114993 | 6261  | 6  | 0 | 5  | Low-quality | 3.83 |
| Sample_T16C_k141_44868  | 5134  | 2  | 0 | 0  | Low-quality | 3.83 |
| Sample_T8B_k141_118240  | 6720  | 23 | 0 | 0  | Low-quality | 3.83 |
| Sample_C11A_k141_98741  | 6305  | 12 | 1 | 0  | Low-quality | 3.83 |
| Sample_C2C_k141_116480  | 7536  | 10 | 0 | 7  | Low-quality | 3.82 |
| Sample_C9B_k141_16612   | 5672  | 6  | 0 | 3  | Low-quality | 3.82 |
| Sample_T6A_k141_261955  | 5034  | 6  | 0 | 1  | Low-quality | 3.82 |
| Sample_C1C_k141_92572   | 9389  | 7  | 1 | 0  | Low-quality | 3.82 |
| Sample_C7B_k141_26545   | 11742 | 10 | 1 | 1  | Low-quality | 3.82 |
| Sample_T12C_k141_2728   | 6746  | 9  | 2 | 0  | Low-quality | 3.82 |
| Sample_C12A_k141_1734   | 7839  | 10 | 0 | 2  | Low-quality | 3.81 |
| Sample_C12C_k141_77771  | 45035 | 49 | 1 | 16 | Low-quality | 3.81 |
| Sample_T15B_k141_114176 | 7092  | 11 | 1 | 2  | Low-quality | 3.81 |
| Sample_T16C_k141_5606   | 8041  | 6  | 0 | 5  | Low-quality | 3.81 |
| Sample_C4C_k141_233928  | 6100  | 7  | 0 | 0  | Low-quality | 3.81 |
| Sample_T3A_k141_45634   | 6127  | 6  | 2 | 0  | Low-quality | 3.81 |
| Sample_T7C_k141_155457  | 10426 | 13 | 2 | 0  | Low-quality | 3.81 |
| Sample_T6C_k141_232341  | 8520  | 9  | 2 | 2  | Low-quality | 3.8  |
| Sample_T3B_k141_172399  | 5382  | 7  | 0 | 0  | Low-quality | 3.79 |
| Sample_T8B_k141_188619  | 6135  | 4  | 2 | 0  | Low-quality | 3.79 |
| Sample_C12B_k141_122734 | 5434  | 7  | 0 | 2  | Low-quality | 3.78 |
| Sample_C4C_k141_161543  | 5325  | 7  | 0 | 4  | Low-quality | 3.78 |
| Sample_T14A_k141_241184 | 6192  | 3  | 1 | 0  | Low-quality | 3.78 |
| Sample_C1B_k141_127300  | 7348  | 6  | 0 | 0  | Low-quality | 3.78 |
| Sample_C7C_k141_77076   | 7699  | 8  | 0 | 6  | Low-quality | 3.77 |
| Sample_T15A_k141_111657 | 6170  | 7  | 0 | 0  | Low-quality | 3.77 |
| Sample_T6C_k141_90723   | 7452  | 6  | 0 | 2  | Low-quality | 3.77 |
| Sample_T4B_k141_20368   | 5192  | 6  | 0 | 0  | Low-quality | 3.77 |
| Sample_T6A_k141_237759  | 6481  | 13 | 3 | 1  | Low-quality | 3.76 |
| Sample_C5A_k141_93339   | 6860  | 8  | 2 | 0  | Low-quality | 3.76 |
| Sample_C8C_k141_23090   | 5503  | 9  | 2 | 0  | Low-quality | 3.76 |
| Sample_C4A_k141_189570  | 5583  | 15 | 1 | 0  | Low-quality | 3.75 |
| Sample_T16B_k141_110464 | 7434  | 6  | 0 | 5  | Low-quality | 3.75 |

|                         |       |    |   |    |             |      |
|-------------------------|-------|----|---|----|-------------|------|
| Sample_T2B_k141_43918   | 6529  | 5  | 0 | 3  | Low-quality | 3.75 |
| Sample_C7C_k141_93684   | 11154 | 10 | 1 | 1  | Low-quality | 3.75 |
| Sample_T10A_k141_98298  | 5495  | 7  | 1 | 0  | Low-quality | 3.75 |
| Sample_T12B_k141_106282 | 6675  | 6  | 1 | 0  | Low-quality | 3.75 |
| Sample_C5A_k141_136591  | 5411  | 10 | 1 | 2  | Low-quality | 3.74 |
| Sample_T6C_k141_253343  | 7461  | 6  | 1 | 4  | Low-quality | 3.74 |
| Sample_C11A_k141_133147 | 6120  | 9  | 1 | 0  | Low-quality | 3.74 |
| Sample_T12B_k141_142883 | 6228  | 10 | 2 | 0  | Low-quality | 3.74 |
| Sample_T3B_k141_5538    | 6530  | 5  | 0 | 0  | Low-quality | 3.73 |
| Sample_C13A_k141_8196   | 13763 | 17 | 3 | 3  | Low-quality | 3.73 |
| Sample_T12B_k141_100157 | 8266  | 13 | 2 | 0  | Low-quality | 3.73 |
| Sample_T14A_k141_62438  | 6494  | 11 | 2 | 0  | Low-quality | 3.73 |
| Sample_T17B_k141_31746  | 5046  | 6  | 1 | 1  | Low-quality | 3.72 |
| Sample_T8A_k141_213074  | 6486  | 8  | 0 | 6  | Low-quality | 3.72 |
| Sample_C4B_k141_253915  | 5061  | 9  | 3 | 0  | Low-quality | 3.72 |
| Sample_C5A_k141_76364   | 6533  | 10 | 3 | 0  | Low-quality | 3.72 |
| Sample_C8C_k141_70110   | 5416  | 9  | 1 | 0  | Low-quality | 3.72 |
| Sample_C3C_k141_173884  | 6644  | 6  | 1 | 0  | Low-quality | 3.71 |
| Sample_C6B_k141_34354   | 51473 | 50 | 2 | 30 | Low-quality | 3.71 |
| Sample_T5C_k141_102445  | 5524  | 11 | 1 | 1  | Low-quality | 3.71 |
| Sample_C1C_k141_164011  | 5063  | 9  | 0 | 0  | Low-quality | 3.71 |
| Sample_C8B_k141_89364   | 5859  | 9  | 1 | 0  | Low-quality | 3.71 |
| Sample_T10A_k141_120012 | 6104  | 8  | 5 | 0  | Low-quality | 3.71 |
| Sample_T13B_k141_168336 | 8092  | 5  | 1 | 1  | Low-quality | 3.71 |
| Sample_T18B_k141_12831  | 6371  | 9  | 6 | 0  | Low-quality | 3.71 |
| Sample_C3C_k141_88762   | 5799  | 9  | 1 | 0  | Low-quality | 3.7  |
| Sample_C5A_k141_45432   | 6488  | 21 | 2 | 0  | Low-quality | 3.7  |
| Sample_T3A_k141_105578  | 7019  | 7  | 0 | 3  | Low-quality | 3.7  |
| Sample_C8C_k141_4758    | 41280 | 35 | 2 | 8  | Low-quality | 3.69 |
| Sample_T13B_k141_15385  | 12132 | 5  | 0 | 3  | Low-quality | 3.69 |
| Sample_T13C_k141_29534  | 12171 | 15 | 2 | 2  | Low-quality | 3.69 |
| Sample_T13B_k141_95296  | 8017  | 11 | 1 | 0  | Low-quality | 3.69 |
| Sample_T6A_k141_82739   | 5242  | 10 | 0 | 0  | Low-quality | 3.69 |
| Sample_T13B_k141_69259  | 13432 | 14 | 1 | 3  | Low-quality | 3.68 |
| Sample_T8C_k141_93140   | 7209  | 8  | 1 | 1  | Low-quality | 3.68 |
| Sample_C5A_k141_231615  | 9530  | 10 | 1 | 1  | Low-quality | 3.67 |
| Sample_T14B_k141_167511 | 6771  | 12 | 1 | 1  | Low-quality | 3.67 |
| Sample_C3A_k141_172635  | 6840  | 4  | 0 | 0  | Low-quality | 3.67 |
| Sample_T14B_k141_90415  | 5540  | 9  | 1 | 0  | Low-quality | 3.67 |

|                                   |       |    |   |    |             |      |
|-----------------------------------|-------|----|---|----|-------------|------|
| Sample_C4A_k141_71692             | 8116  | 8  | 1 | 2  | Low-quality | 3.66 |
| Sample_C4B_k141_100760            | 5472  | 3  | 2 | 0  | Low-quality | 3.66 |
| Sample_C5C_k141_43683             | 5311  | 10 | 0 | 0  | Low-quality | 3.65 |
| Sample_T2A_k141_95882             | 19768 | 25 | 1 | 11 | Low-quality | 3.65 |
| Sample_C4C_k141_91365             | 6046  | 6  | 4 | 0  | Low-quality | 3.65 |
| Sample_T11C_k141_80485            | 5526  | 6  | 0 | 0  | Low-quality | 3.65 |
| Sample_T12A_k141_237438           | 6435  | 11 | 4 | 0  | Low-quality | 3.65 |
| Sample_T12C_k141_124337           | 6428  | 14 | 0 | 0  | Low-quality | 3.65 |
| Sample_C3B_k141_116172            | 13792 | 15 | 0 | 7  | Low-quality | 3.64 |
| Sample_T8A_k141_173837            | 7394  | 7  | 0 | 6  | Low-quality | 3.64 |
| Sample_C9A_k141_79938             | 5730  | 19 | 5 | 0  | Low-quality | 3.64 |
| Sample_C14C_k141_113988           | 5571  | 8  | 0 | 8  | Low-quality | 3.63 |
| Sample_T12A_k141_40202            | 7880  | 4  | 0 | 3  | Low-quality | 3.63 |
| Sample_T2C_k141_161977            | 7511  | 9  | 0 | 8  | Low-quality | 3.63 |
| Sample_T4A_k141_28018             | 5343  | 8  | 0 | 1  | Low-quality | 3.63 |
| Sample_T5C_k141_174082_fragment_1 | 6766  | 8  | 0 | 1  | Low-quality | 3.63 |
| Sample_C11A_k141_45348            | 6284  | 7  | 0 | 1  | Low-quality | 3.62 |
| Sample_C11C_k141_134640           | 6682  | 10 | 1 | 0  | Low-quality | 3.62 |
| Sample_C7A_k141_101755            | 5074  | 10 | 0 | 0  | Low-quality | 3.62 |
| Sample_T11B_k141_34489            | 5515  | 5  | 0 | 1  | Low-quality | 3.62 |
| Sample_T12C_k141_67447            | 5733  | 5  | 0 | 1  | Low-quality | 3.62 |
| Sample_C10A_k141_135688           | 5543  | 12 | 1 | 0  | Low-quality | 3.62 |
| Sample_C2B_k141_250728            | 7056  | 8  | 2 | 1  | Low-quality | 3.62 |
| Sample_T2B_k141_238661            | 5629  | 4  | 0 | 4  | Low-quality | 3.61 |
| Sample_T6A_k141_253206            | 13520 | 10 | 0 | 9  | Low-quality | 3.61 |
| Sample_C10A_k141_199144           | 6191  | 9  | 5 | 0  | Low-quality | 3.61 |
| Sample_C14B_k141_79155            | 5725  | 9  | 0 | 0  | Low-quality | 3.61 |
| Sample_C1C_k141_158628            | 5815  | 7  | 0 | 0  | Low-quality | 3.61 |
| Sample_T17B_k141_37921            | 6472  | 8  | 1 | 0  | Low-quality | 3.61 |
| Sample_C2C_k141_196957            | 7985  | 8  | 0 | 8  | Low-quality | 3.6  |
| Sample_C9A_k141_134072            | 9034  | 8  | 1 | 3  | Low-quality | 3.6  |
| Sample_T12C_k141_60320            | 5539  | 4  | 0 | 0  | Low-quality | 3.6  |
| Sample_T12B_k141_91169            | 5675  | 10 | 1 | 0  | Low-quality | 3.6  |
| Sample_C6B_k141_59656             | 12798 | 20 | 1 | 1  | Low-quality | 3.59 |
| Sample_T13A_k141_46432            | 6623  | 12 | 1 | 1  | Low-quality | 3.59 |
| Sample_T16B_k141_86504            | 6265  | 6  | 0 | 5  | Low-quality | 3.59 |
| Sample_T6C_k141_13811             | 6392  | 4  | 0 | 2  | Low-quality | 3.59 |
| Sample_C11A_k141_94974            | 8396  | 9  | 2 | 2  | Low-quality | 3.58 |
| Sample_C9A_k141_122959            | 7707  | 15 | 2 | 0  | Low-quality | 3.58 |



|                         |       |    |   |   |             |      |
|-------------------------|-------|----|---|---|-------------|------|
| Sample_T11A_k141_48091  | 7715  | 7  | 0 | 1 | Low-quality | 3.58 |
| Sample_T8B_k141_79470   | 9683  | 15 | 2 | 0 | Low-quality | 3.58 |
| Sample_T12C_k141_80836  | 6784  | 8  | 1 | 0 | Low-quality | 3.57 |
| Sample_C1A_k141_54026   | 6014  | 8  | 3 | 0 | Low-quality | 3.57 |
| Sample_C11C_k141_109804 | 11580 | 9  | 0 | 7 | Low-quality | 3.56 |
| Sample_C2A_k141_170733  | 7040  | 7  | 1 | 5 | Low-quality | 3.56 |
| Sample_C5A_k141_122388  | 5496  | 9  | 1 | 0 | Low-quality | 3.56 |
| Sample_T10A_k141_100598 | 16593 | 23 | 1 | 2 | Low-quality | 3.56 |
| Sample_T5C_k141_48133   | 5660  | 7  | 1 | 0 | Low-quality | 3.56 |
| Sample_C10A_k141_275544 | 5806  | 9  | 1 | 0 | Low-quality | 3.56 |
| Sample_C8C_k141_172474  | 5158  | 7  | 0 | 1 | Low-quality | 3.56 |
| Sample_T12B_k141_30835  | 6665  | 10 | 4 | 0 | Low-quality | 3.56 |
| Sample_T16B_k141_173701 | 10871 | 19 | 1 | 0 | Low-quality | 3.56 |
| Sample_T1C_k141_58293   | 6728  | 5  | 1 | 1 | Low-quality | 3.56 |
| Sample_T6A_k141_118478  | 5052  | 8  | 1 | 1 | Low-quality | 3.56 |
| Sample_C11B_k141_174115 | 5135  | 10 | 0 | 0 | Low-quality | 3.55 |
| Sample_C2A_k141_298496  | 5066  | 4  | 0 | 1 | Low-quality | 3.55 |
| Sample_C6C_k141_156651  | 6204  | 8  | 0 | 7 | Low-quality | 3.55 |
| Sample_T3B_k141_48996   | 5343  | 3  | 0 | 0 | Low-quality | 3.55 |
| Sample_T4C_k141_53513   | 7080  | 6  | 1 | 4 | Low-quality | 3.55 |
| Sample_T15A_k141_148030 | 8640  | 13 | 3 | 0 | Low-quality | 3.55 |
| Sample_C11B_k141_82556  | 19264 | 12 | 1 | 3 | Low-quality | 3.54 |
| Sample_C4A_k141_98645   | 5060  | 8  | 0 | 1 | Low-quality | 3.54 |
| Sample_C4C_k141_240105  | 7439  | 6  | 1 | 2 | Low-quality | 3.54 |
| Sample_T12A_k141_75485  | 5122  | 7  | 0 | 1 | Low-quality | 3.54 |
| Sample_T13C_k141_15348  | 6519  | 8  | 1 | 0 | Low-quality | 3.54 |
| Sample_T4B_k141_133661  | 5795  | 10 | 0 | 0 | Low-quality | 3.54 |
| Sample_T5B_k141_63502   | 6382  | 6  | 0 | 1 | Low-quality | 3.54 |
| Sample_T6B_k141_136506  | 5098  | 4  | 1 | 0 | Low-quality | 3.54 |
| Sample_C10C_k141_75400  | 6399  | 5  | 0 | 4 | Low-quality | 3.53 |
| Sample_C14A_k141_202635 | 7331  | 5  | 1 | 1 | Low-quality | 3.53 |
| Sample_T2B_k141_157719  | 7598  | 10 | 5 | 0 | Low-quality | 3.53 |
| Sample_C11B_k141_8932   | 8282  | 8  | 1 | 1 | Low-quality | 3.52 |
| Sample_C11B_k141_233730 | 8594  | 6  | 1 | 2 | Low-quality | 3.51 |
| Sample_C5B_k141_64990   | 5301  | 8  | 0 | 6 | Low-quality | 3.51 |
| Sample_C6C_k141_110234  | 9387  | 10 | 1 | 3 | Low-quality | 3.51 |
| Sample_C9A_k141_61723   | 6355  | 8  | 0 | 1 | Low-quality | 3.51 |
| Sample_T10B_k141_81440  | 6735  | 3  | 2 | 0 | Low-quality | 3.51 |
| Sample_T15B_k141_14615  | 6947  | 5  | 1 | 0 | Low-quality | 3.51 |

|                                   |       |    |   |   |             |      |
|-----------------------------------|-------|----|---|---|-------------|------|
| Sample_C5A_k141_11546             | 5327  | 10 | 0 | 0 | Low-quality | 3.51 |
| Sample_T2B_k141_276261            | 12342 | 10 | 1 | 2 | Low-quality | 3.51 |
| Sample_T2C_k141_40266             | 7375  | 13 | 3 | 2 | Low-quality | 3.51 |
| Sample_T11C_k141_132888           | 6347  | 11 | 0 | 0 | Low-quality | 3.5  |
| Sample_T12B_k141_144599           | 7552  | 5  | 1 | 3 | Low-quality | 3.5  |
| Sample_T17C_k141_3191             | 8628  | 10 | 1 | 2 | Low-quality | 3.5  |
| Sample_T13A_k141_82371            | 7605  | 15 | 1 | 1 | Low-quality | 3.5  |
| Sample_C1C_k141_178946            | 5496  | 7  | 1 | 0 | Low-quality | 3.49 |
| Sample_C4C_k141_46800             | 10728 | 13 | 1 | 1 | Low-quality | 3.49 |
| Sample_T10A_k141_86098            | 6091  | 6  | 0 | 5 | Low-quality | 3.49 |
| Sample_C10A_k141_217249           | 5020  | 4  | 2 | 0 | Low-quality | 3.49 |
| Sample_C7C_k141_61097             | 6074  | 6  | 0 | 2 | Low-quality | 3.48 |
| Sample_T15C_k141_90270            | 6069  | 4  | 0 | 4 | Low-quality | 3.48 |
| Sample_T18A_k141_7173             | 5527  | 9  | 0 | 7 | Low-quality | 3.48 |
| Sample_T4C_k141_11589             | 6122  | 7  | 0 | 7 | Low-quality | 3.48 |
| Sample_T6A_k141_81448             | 12411 | 8  | 1 | 4 | Low-quality | 3.48 |
| Sample_C6C_k141_156639            | 12242 | 22 | 2 | 4 | Low-quality | 3.48 |
| Sample_C9A_k141_130914            | 6151  | 15 | 1 | 0 | Low-quality | 3.48 |
| Sample_C7A_k141_521               | 7460  | 7  | 1 | 5 | Low-quality | 3.47 |
| Sample_T10A_k141_97895            | 6351  | 8  | 0 | 3 | Low-quality | 3.47 |
| Sample_T11B_k141_85837            | 6742  | 11 | 2 | 2 | Low-quality | 3.47 |
| Sample_C12B_k141_55585            | 7008  | 7  | 1 | 1 | Low-quality | 3.47 |
| Sample_C1B_k141_120627            | 7474  | 10 | 3 | 1 | Low-quality | 3.47 |
| Sample_C5A_k141_200047_fragment_1 | 7468  | 12 | 1 | 0 | Low-quality | 3.47 |
| Sample_C3B_k141_185860            | 6045  | 5  | 0 | 4 | Low-quality | 3.46 |
| Sample_T10A_k141_139676           | 11524 | 16 | 1 | 0 | Low-quality | 3.46 |
| Sample_T14A_k141_19430            | 6036  | 6  | 0 | 4 | Low-quality | 3.46 |
| Sample_T3A_k141_120783            | 5236  | 7  | 0 | 3 | Low-quality | 3.46 |
| Sample_T7A_k141_205849            | 5374  | 5  | 0 | 0 | Low-quality | 3.46 |
| Sample_C4B_k141_65903             | 6231  | 9  | 2 | 0 | Low-quality | 3.46 |
| Sample_C5A_k141_15840             | 6009  | 7  | 1 | 0 | Low-quality | 3.46 |
| Sample_T2A_k141_35946             | 5055  | 4  | 1 | 0 | Low-quality | 3.46 |
| Sample_T6A_k141_151832            | 5584  | 5  | 2 | 0 | Low-quality | 3.46 |
| Sample_C10C_k141_77055            | 7182  | 8  | 0 | 7 | Low-quality | 3.45 |
| Sample_C3B_k141_166197            | 5337  | 7  | 0 | 7 | Low-quality | 3.45 |
| Sample_C5A_k141_147705            | 5146  | 3  | 2 | 0 | Low-quality | 3.45 |
| Sample_T12C_k141_152833           | 12365 | 13 | 1 | 1 | Low-quality | 3.45 |
| Sample_T2B_k141_131843            | 5945  | 9  | 1 | 0 | Low-quality | 3.45 |
| Sample_C12A_k141_125739           | 5723  | 6  | 3 | 0 | Low-quality | 3.45 |

|                                    |       |    |   |   |             |      |
|------------------------------------|-------|----|---|---|-------------|------|
| Sample_T14A_k141_4001              | 7394  | 14 | 1 | 0 | Low-quality | 3.45 |
| Sample_T3A_k141_3259_fragment_2    | 6112  | 9  | 1 | 2 | Low-quality | 3.45 |
| Sample_T8C_k141_73126              | 5313  | 7  | 6 | 0 | Low-quality | 3.45 |
| Sample_C2B_k141_314136             | 10469 | 10 | 0 | 6 | Low-quality | 3.44 |
| Sample_T4B_k141_167398             | 5406  | 7  | 0 | 3 | Low-quality | 3.44 |
| Sample_C9B_k141_28231              | 5342  | 10 | 1 | 0 | Low-quality | 3.44 |
| Sample_C6C_k141_59167              | 7374  | 8  | 2 | 2 | Low-quality | 3.43 |
| Sample_C10A_k141_83210             | 7982  | 8  | 1 | 6 | Low-quality | 3.42 |
| Sample_C2B_k141_278487             | 5966  | 7  | 0 | 7 | Low-quality | 3.42 |
| Sample_T2A_k141_191831             | 15053 | 15 | 2 | 3 | Low-quality | 3.42 |
| Sample_C6C_k141_47406              | 5642  | 5  | 0 | 4 | Low-quality | 3.41 |
| Sample_C5A_k141_154312             | 7564  | 7  | 1 | 0 | Low-quality | 3.41 |
| Sample_T12B_k141_153954_fragment_1 | 11976 | 17 | 1 | 1 | Low-quality | 3.41 |
| Sample_T3C_k141_45620              | 6616  | 8  | 3 | 0 | Low-quality | 3.41 |
| Sample_T10C_k141_37035             | 8980  | 8  | 0 | 7 | Low-quality | 3.4  |
| Sample_T11B_k141_90466             | 5930  | 6  | 0 | 4 | Low-quality | 3.4  |
| Sample_T7B_k141_155596             | 5937  | 5  | 0 | 4 | Low-quality | 3.4  |
| Sample_C12C_k141_123418            | 5112  | 6  | 1 | 1 | Low-quality | 3.4  |
| Sample_C2B_k141_54238              | 5457  | 4  | 0 | 3 | Low-quality | 3.39 |
| Sample_T12C_k141_38701             | 7902  | 8  | 0 | 7 | Low-quality | 3.39 |
| Sample_C3C_k141_14539              | 5726  | 4  | 2 | 0 | Low-quality | 3.39 |
| Sample_C14C_k141_41383             | 6229  | 9  | 1 | 0 | Low-quality | 3.38 |
| Sample_T16B_k141_20306             | 6254  | 2  | 0 | 2 | Low-quality | 3.38 |
| Sample_T18B_k141_21167             | 5068  | 6  | 1 | 0 | Low-quality | 3.38 |
| Sample_T1C_k141_54683              | 6364  | 7  | 0 | 3 | Low-quality | 3.38 |
| Sample_C11A_k141_133583            | 5493  | 10 | 1 | 0 | Low-quality | 3.38 |
| Sample_T4C_k141_72002              | 5575  | 6  | 1 | 0 | Low-quality | 3.38 |
| Sample_T8B_k141_214298             | 5884  | 6  | 4 | 0 | Low-quality | 3.38 |
| Sample_C6A_k141_83796              | 6215  | 5  | 1 | 2 | Low-quality | 3.37 |
| Sample_T11C_k141_23146             | 5191  | 5  | 0 | 2 | Low-quality | 3.37 |
| Sample_T8C_k141_162173             | 7326  | 3  | 0 | 3 | Low-quality | 3.37 |
| Sample_C7A_k141_161478             | 8301  | 13 | 1 | 0 | Low-quality | 3.37 |
| Sample_C3C_k141_158652             | 5942  | 7  | 0 | 7 | Low-quality | 3.36 |
| Sample_T12A_k141_205719            | 6917  | 7  | 0 | 4 | Low-quality | 3.36 |
| Sample_C9A_k141_29991              | 5893  | 12 | 5 | 1 | Low-quality | 3.36 |
| Sample_C10A_k141_125201            | 9506  | 6  | 0 | 4 | Low-quality | 3.35 |
| Sample_C7B_k141_107812             | 6781  | 5  | 0 | 5 | Low-quality | 3.35 |
| Sample_T17A_k141_40775             | 5850  | 5  | 0 | 3 | Low-quality | 3.35 |
| Sample_C10A_k141_73352             | 9783  | 6  | 1 | 1 | Low-quality | 3.35 |

|                                    |        |     |   |    |             |      |
|------------------------------------|--------|-----|---|----|-------------|------|
| Sample_C5A_k141_87429              | 5724   | 5   | 1 | 0  | Low-quality | 3.35 |
| Sample_C7A_k141_176599             | 5298   | 8   | 0 | 1  | Low-quality | 3.35 |
| Sample_C3C_k141_82423              | 5132   | 6   | 0 | 1  | Low-quality | 3.34 |
| Sample_C6C_k141_66532              | 5832   | 5   | 0 | 5  | Low-quality | 3.34 |
| Sample_C9B_k141_35316              | 9382   | 12  | 1 | 3  | Low-quality | 3.34 |
| Sample_T6A_k141_256360             | 5562   | 15  | 2 | 0  | Low-quality | 3.34 |
| Sample_C12A_k141_173304            | 5845   | 7   | 1 | 0  | Low-quality | 3.34 |
| Sample_C4B_k141_48517              | 5453   | 6   | 5 | 0  | Low-quality | 3.34 |
| Sample_T15C_k141_3521              | 5486   | 10  | 1 | 0  | Low-quality | 3.34 |
| Sample_T7B_k141_149941             | 6753   | 12  | 3 | 0  | Low-quality | 3.34 |
| Sample_C4B_k141_31342              | 6702   | 8   | 1 | 1  | Low-quality | 3.33 |
| Sample_T12A_k141_85320             | 5573   | 6   | 1 | 4  | Low-quality | 3.33 |
| Sample_T14A_k141_220936            | 5791   | 8   | 0 | 1  | Low-quality | 3.33 |
| Sample_T15B_k141_83747             | 11112  | 9   | 1 | 3  | Low-quality | 3.33 |
| Sample_T15C_k141_57145             | 13248  | 12  | 3 | 4  | Low-quality | 3.33 |
| Sample_T4B_k141_46105              | 7342   | 9   | 1 | 1  | Low-quality | 3.33 |
| Sample_T8A_k141_200472             | 5242   | 6   | 0 | 0  | Low-quality | 3.33 |
| Sample_C10B_k141_51126             | 11847  | 12  | 1 | 1  | Low-quality | 3.32 |
| Sample_C8C_k141_18488              | 123911 | 106 | 2 | 60 | Low-quality | 3.31 |
| Sample_C13C_k141_56112_fragment_1  | 7589   | 10  | 0 | 0  | Low-quality | 3.31 |
| Sample_C5A_k141_53040              | 5822   | 14  | 1 | 0  | Low-quality | 3.31 |
| Sample_C10C_k141_51916             | 5107   | 11  | 1 | 0  | Low-quality | 3.3  |
| Sample_T1A_k141_46047              | 5071   | 9   | 0 | 7  | Low-quality | 3.3  |
| Sample_C10A_k141_49839             | 5110   | 5   | 1 | 1  | Low-quality | 3.29 |
| Sample_C11A_k141_65171             | 6201   | 9   | 1 | 1  | Low-quality | 3.29 |
| Sample_C5B_k141_63073              | 10298  | 10  | 0 | 5  | Low-quality | 3.29 |
| Sample_T3B_k141_112368             | 8886   | 6   | 0 | 6  | Low-quality | 3.29 |
| Sample_T4C_k141_107469             | 5317   | 6   | 0 | 4  | Low-quality | 3.29 |
| Sample_C11B_k141_149104            | 5498   | 13  | 0 | 0  | Low-quality | 3.29 |
| Sample_C13A_k141_120291            | 5890   | 9   | 1 | 1  | Low-quality | 3.29 |
| Sample_T5C_k141_159631             | 6470   | 7   | 0 | 2  | Low-quality | 3.29 |
| Sample_C4B_k141_13480              | 39156  | 33  | 1 | 28 | Low-quality | 3.28 |
| Sample_C8C_k141_22866              | 6511   | 10  | 1 | 0  | Low-quality | 3.28 |
| Sample_T5C_k141_80515              | 5465   | 3   | 0 | 3  | Low-quality | 3.27 |
| Sample_C11C_k141_119552_fragment_1 | 6346   | 10  | 1 | 1  | Low-quality | 3.27 |
| Sample_C1C_k141_178997             | 5496   | 7   | 0 | 0  | Low-quality | 3.27 |
| Sample_C5A_k141_202970             | 5508   | 7   | 2 | 0  | Low-quality | 3.27 |
| Sample_C6C_k141_61306_fragment_1   | 6352   | 8   | 1 | 1  | Low-quality | 3.27 |
| Sample_C5B_k141_46104              | 5052   | 4   | 0 | 1  | Low-quality | 3.26 |

|                                    |        |     |   |    |             |      |
|------------------------------------|--------|-----|---|----|-------------|------|
| Sample_C8A_k141_3804               | 5872   | 18  | 0 | 0  | Low-quality | 3.26 |
| Sample_T4B_k141_341949             | 6402   | 8   | 1 | 2  | Low-quality | 3.26 |
| Sample_C2C_k141_125318             | 7233   | 10  | 1 | 0  | Low-quality | 3.26 |
| Sample_C10A_k141_153243            | 10459  | 8   | 0 | 8  | Low-quality | 3.25 |
| Sample_C14A_k141_149225            | 21589  | 19  | 2 | 5  | Low-quality | 3.25 |
| Sample_C3C_k141_50182              | 7048   | 4   | 0 | 4  | Low-quality | 3.25 |
| Sample_T15A_k141_169253            | 5986   | 12  | 1 | 1  | Low-quality | 3.25 |
| Sample_T15B_k141_93249             | 5539   | 18  | 1 | 0  | Low-quality | 3.25 |
| Sample_T3B_k141_186474             | 7058   | 4   | 0 | 4  | Low-quality | 3.25 |
| Sample_T10A_k141_184003            | 5499   | 15  | 3 | 0  | Low-quality | 3.25 |
| Sample_T16A_k141_81481             | 5553   | 8   | 1 | 1  | Low-quality | 3.25 |
| Sample_C10A_k141_330534            | 15141  | 11  | 0 | 7  | Low-quality | 3.24 |
| Sample_C13B_k141_22678             | 5652   | 6   | 0 | 5  | Low-quality | 3.24 |
| Sample_C11A_k141_113471            | 5526   | 6   | 1 | 0  | Low-quality | 3.24 |
| Sample_T11A_k141_143443            | 5961   | 9   | 3 | 0  | Low-quality | 3.24 |
| Sample_T14B_k141_153239            | 5059   | 7   | 4 | 1  | Low-quality | 3.24 |
| Sample_C13A_k141_15814             | 5960   | 12  | 1 | 1  | Low-quality | 3.23 |
| Sample_T11B_k141_135777            | 5753   | 10  | 0 | 0  | Low-quality | 3.23 |
| Sample_T12A_k141_244490            | 5376   | 3   | 0 | 1  | Low-quality | 3.22 |
| Sample_C1C_k141_155758             | 8547   | 12  | 1 | 0  | Low-quality | 3.21 |
| Sample_T15C_k141_133586_fragment_2 | 8119   | 11  | 3 | 0  | Low-quality | 3.21 |
| Sample_C4A_k141_104790             | 5803   | 6   | 2 | 2  | Low-quality | 3.2  |
| Sample_C5A_k141_163505             | 5644   | 1   | 0 | 0  | Low-quality | 3.2  |
| Sample_T12A_k141_163094            | 7348   | 15  | 2 | 0  | Low-quality | 3.2  |
| Sample_C2A_k141_287122             | 6476   | 7   | 0 | 6  | Low-quality | 3.19 |
| Sample_C3C_k141_14176              | 5004   | 9   | 1 | 0  | Low-quality | 3.19 |
| Sample_T12C_k141_126413            | 5844   | 6   | 2 | 1  | Low-quality | 3.19 |
| Sample_T12C_k141_140457            | 5633   | 10  | 2 | 0  | Low-quality | 3.19 |
| Sample_T6A_k141_67977              | 5280   | 9   | 0 | 1  | Low-quality | 3.19 |
| Sample_C3A_k141_215233             | 6048   | 7   | 1 | 2  | Low-quality | 3.18 |
| Sample_C3C_k141_81437              | 6428   | 6   | 0 | 4  | Low-quality | 3.18 |
| Sample_T1A_k141_29695              | 7499   | 5   | 1 | 1  | Low-quality | 3.18 |
| Sample_T3B_k141_165874             | 149138 | 134 | 4 | 96 | Low-quality | 3.18 |
| Sample_T8B_k141_258109             | 5153   | 9   | 0 | 0  | Low-quality | 3.18 |
| Sample_T14B_k141_109428            | 5139   | 6   | 1 | 1  | Low-quality | 3.18 |
| Sample_C10A_k141_107424            | 8904   | 10  | 1 | 1  | Low-quality | 3.17 |
| Sample_C12B_k141_187080_fragment_1 | 8253   | 8   | 1 | 0  | Low-quality | 3.17 |
| Sample_T10A_k141_72234             | 7082   | 11  | 1 | 0  | Low-quality | 3.17 |
| Sample_C10A_k141_103705            | 12505  | 11  | 0 | 10 | Low-quality | 3.16 |

|                                  |       |    |   |    |             |      |
|----------------------------------|-------|----|---|----|-------------|------|
| Sample_C1A_k141_118427           | 5103  | 7  | 1 | 1  | Low-quality | 3.16 |
| Sample_C4C_k141_252345           | 5733  | 9  | 0 | 0  | Low-quality | 3.16 |
| Sample_T14C_k141_102579          | 5817  | 12 | 1 | 1  | Low-quality | 3.16 |
| Sample_T2B_k141_279743           | 6010  | 13 | 1 | 1  | Low-quality | 3.16 |
| Sample_T12B_k141_18173           | 5560  | 14 | 0 | 0  | Low-quality | 3.16 |
| Sample_T14A_k141_170640          | 5338  | 11 | 0 | 0  | Low-quality | 3.16 |
| Sample_C2C_k141_248215           | 7902  | 11 | 0 | 6  | Low-quality | 3.15 |
| Sample_T10C_k141_31379           | 7696  | 4  | 1 | 2  | Low-quality | 3.15 |
| Sample_T12B_k141_34123           | 6849  | 6  | 0 | 4  | Low-quality | 3.15 |
| Sample_T8B_k141_5697             | 9604  | 8  | 0 | 6  | Low-quality | 3.15 |
| Sample_C11A_k141_173504          | 5411  | 14 | 4 | 0  | Low-quality | 3.15 |
| Sample_C9A_k141_44030            | 6092  | 8  | 1 | 0  | Low-quality | 3.15 |
| Sample_C1C_k141_122099           | 5564  | 8  | 0 | 1  | Low-quality | 3.14 |
| Sample_T14B_k141_46729           | 5713  | 6  | 0 | 0  | Low-quality | 3.14 |
| Sample_T15A_k141_173282          | 5414  | 8  | 0 | 0  | Low-quality | 3.14 |
| Sample_C13C_k141_726             | 9527  | 15 | 2 | 1  | Low-quality | 3.14 |
| Sample_C3C_k141_72865            | 5460  | 11 | 0 | 0  | Low-quality | 3.14 |
| Sample_T7C_k141_119540           | 5815  | 5  | 0 | 4  | Low-quality | 3.13 |
| Sample_T17B_k141_3741_fragment_1 | 5652  | 7  | 1 | 0  | Low-quality | 3.13 |
| Sample_C1B_k141_249054           | 6728  | 11 | 0 | 0  | Low-quality | 3.12 |
| Sample_C3C_k141_66935            | 5777  | 8  | 0 | 0  | Low-quality | 3.12 |
| Sample_T5C_k141_82735            | 6026  | 10 | 0 | 0  | Low-quality | 3.12 |
| Sample_C11A_k141_3049            | 5366  | 17 | 0 | 0  | Low-quality | 3.12 |
| Sample_T8C_k141_91124            | 5591  | 6  | 1 | 0  | Low-quality | 3.12 |
| Sample_C4B_k141_254401           | 6118  | 4  | 0 | 2  | Low-quality | 3.11 |
| Sample_T11C_k141_107698          | 5737  | 10 | 1 | 0  | Low-quality | 3.11 |
| Sample_T14A_k141_36301           | 26243 | 29 | 3 | 21 | Low-quality | 3.11 |
| Sample_T16B_k141_6069            | 5729  | 6  | 1 | 0  | Low-quality | 3.11 |
| Sample_T18C_k141_73432           | 5944  | 4  | 1 | 1  | Low-quality | 3.11 |
| Sample_T6A_k141_88441            | 5650  | 14 | 1 | 0  | Low-quality | 3.11 |
| Sample_T12C_k141_118656          | 5216  | 8  | 0 | 0  | Low-quality | 3.11 |
| Sample_C5A_k141_171773           | 6472  | 8  | 2 | 1  | Low-quality | 3.1  |
| Sample_T12A_k141_163109          | 6234  | 5  | 1 | 3  | Low-quality | 3.1  |
| Sample_T13B_k141_79301           | 5257  | 4  | 1 | 0  | Low-quality | 3.1  |
| Sample_T13C_k141_71239           | 5404  | 6  | 0 | 2  | Low-quality | 3.1  |
| Sample_C10A_k141_276581          | 5464  | 4  | 0 | 3  | Low-quality | 3.09 |
| Sample_C5A_k141_236691           | 5386  | 11 | 6 | 0  | Low-quality | 3.09 |
| Sample_T4B_k141_45178            | 13822 | 13 | 2 | 4  | Low-quality | 3.09 |
| Sample_T7B_k141_145754           | 6366  | 12 | 3 | 1  | Low-quality | 3.09 |

|                         |       |    |   |    |             |      |
|-------------------------|-------|----|---|----|-------------|------|
| Sample_C4B_k141_244083  | 5593  | 2  | 0 | 2  | Low-quality | 3.07 |
| Sample_C6B_k141_28190   | 38235 | 30 | 1 | 21 | Low-quality | 3.07 |
| Sample_T12C_k141_83838  | 5981  | 20 | 0 | 0  | Low-quality | 3.07 |
| Sample_T5C_k141_195079  | 7463  | 9  | 1 | 0  | Low-quality | 3.07 |
| Sample_T6B_k141_87896   | 5018  | 6  | 0 | 0  | Low-quality | 3.07 |
| Sample_C9A_k141_27898   | 5145  | 14 | 3 | 0  | Low-quality | 3.07 |
| Sample_T14A_k141_176846 | 6292  | 10 | 1 | 2  | Low-quality | 3.07 |
| Sample_T12A_k141_239118 | 5335  | 5  | 0 | 4  | Low-quality | 3.06 |
| Sample_T16B_k141_154784 | 5372  | 8  | 0 | 0  | Low-quality | 3.06 |
| Sample_C5A_k141_190823  | 6599  | 8  | 2 | 0  | Low-quality | 3.06 |
| Sample_T12A_k141_92650  | 7879  | 9  | 2 | 0  | Low-quality | 3.06 |
| Sample_T8B_k141_268548  | 6790  | 7  | 1 | 0  | Low-quality | 3.06 |
| Sample_C10C_k141_17834  | 5591  | 4  | 0 | 4  | Low-quality | 3.05 |
| Sample_C6A_k141_190674  | 8601  | 6  | 0 | 5  | Low-quality | 3.05 |
| Sample_T10B_k141_131369 | 5208  | 3  | 0 | 0  | Low-quality | 3.05 |
| Sample_T6C_k141_186808  | 9358  | 9  | 1 | 5  | Low-quality | 3.05 |
| Sample_T7A_k141_93107   | 5349  | 7  | 1 | 0  | Low-quality | 3.05 |
| Sample_C14C_k141_122589 | 5151  | 4  | 0 | 4  | Low-quality | 3.04 |
| Sample_T2B_k141_293980  | 5315  | 2  | 0 | 2  | Low-quality | 3.04 |
| Sample_T4C_k141_44053   | 9692  | 10 | 0 | 8  | Low-quality | 3.04 |
| Sample_T5C_k141_31401   | 6095  | 7  | 0 | 0  | Low-quality | 3.04 |
| Sample_T7C_k141_62615   | 8328  | 6  | 2 | 0  | Low-quality | 3.04 |
| Sample_C6C_k141_80399   | 5553  | 12 | 1 | 0  | Low-quality | 3.03 |
| Sample_T3B_k141_171391  | 5372  | 6  | 0 | 0  | Low-quality | 3.03 |
| Sample_T6A_k141_265916  | 10725 | 16 | 1 | 0  | Low-quality | 3.03 |
| Sample_C11B_k141_8456   | 10262 | 11 | 1 | 5  | Low-quality | 3.02 |
| Sample_C7C_k141_52876   | 6152  | 5  | 1 | 3  | Low-quality | 3.02 |
| Sample_T11B_k141_135748 | 5469  | 13 | 0 | 0  | Low-quality | 3.02 |
| Sample_T12B_k141_34042  | 5669  | 9  | 3 | 4  | Low-quality | 3.02 |
| Sample_T17C_k141_17838  | 16679 | 17 | 0 | 6  | Low-quality | 3.02 |
| Sample_T12A_k141_341666 | 5176  | 5  | 1 | 0  | Low-quality | 3.02 |
| Sample_T6C_k141_270248  | 6784  | 8  | 1 | 1  | Low-quality | 3.01 |
| Sample_T12B_k141_114233 | 5595  | 9  | 1 | 0  | Low-quality | 3.01 |
| Sample_C10C_k141_33779  | 7511  | 6  | 0 | 6  | Low-quality | 3    |
| Sample_C11A_k141_22549  | 5539  | 7  | 1 | 0  | Low-quality | 3    |
| Sample_C4B_k141_82472   | 10279 | 7  | 0 | 5  | Low-quality | 3    |
| Sample_T8A_k141_122737  | 5435  | 2  | 0 | 0  | Low-quality | 3    |
| Sample_T8B_k141_17029   | 5336  | 7  | 0 | 0  | Low-quality | 3    |
| Sample_T8A_k141_225013  | 6690  | 11 | 1 | 0  | Low-quality | 3    |

|                                   |        |     |   |    |             |      |
|-----------------------------------|--------|-----|---|----|-------------|------|
| Sample_C2C_k141_192940            | 5337   | 6   | 1 | 0  | Low-quality | 2.99 |
| Sample_C9A_k141_124437            | 5772   | 4   | 0 | 3  | Low-quality | 2.99 |
| Sample_C4C_k141_9992              | 5094   | 12  | 2 | 0  | Low-quality | 2.99 |
| Sample_C2B_k141_279693            | 8383   | 7   | 1 | 4  | Low-quality | 2.98 |
| Sample_C2C_k141_177757            | 5693   | 4   | 0 | 2  | Low-quality | 2.98 |
| Sample_T16B_k141_115812           | 5493   | 9   | 1 | 0  | Low-quality | 2.98 |
| Sample_C10A_k141_250804           | 5555   | 5   | 3 | 0  | Low-quality | 2.98 |
| Sample_C5B_k141_50246             | 6480   | 4   | 2 | 0  | Low-quality | 2.98 |
| Sample_C8A_k141_117608            | 9819   | 11  | 0 | 9  | Low-quality | 2.97 |
| Sample_T10B_k141_106211           | 6821   | 8   | 0 | 2  | Low-quality | 2.97 |
| Sample_T12A_k141_20105            | 10907  | 8   | 1 | 2  | Low-quality | 2.97 |
| Sample_T6A_k141_166633            | 9371   | 8   | 0 | 6  | Low-quality | 2.97 |
| Sample_C5A_k141_194326            | 6401   | 10  | 3 | 0  | Low-quality | 2.97 |
| Sample_C5C_k141_38302             | 6905   | 12  | 1 | 0  | Low-quality | 2.97 |
| Sample_T12C_k141_25490            | 5393   | 12  | 1 | 0  | Low-quality | 2.97 |
| Sample_T4B_k141_271980            | 6976   | 14  | 3 | 0  | Low-quality | 2.97 |
| Sample_C3B_k141_56785             | 5191   | 5   | 0 | 3  | Low-quality | 2.96 |
| Sample_C4A_k141_136909            | 11069  | 10  | 0 | 7  | Low-quality | 2.96 |
| Sample_C6C_k141_205170            | 125574 | 128 | 2 | 85 | Low-quality | 2.96 |
| Sample_T10B_k141_99390            | 7726   | 5   | 1 | 0  | Low-quality | 2.96 |
| Sample_T5B_k141_43512             | 6059   | 9   | 1 | 2  | Low-quality | 2.96 |
| Sample_C4B_k141_229637            | 7395   | 4   | 0 | 3  | Low-quality | 2.95 |
| Sample_T13C_k141_121350           | 5151   | 7   | 0 | 7  | Low-quality | 2.95 |
| Sample_T7C_k141_64215             | 8078   | 7   | 0 | 0  | Low-quality | 2.95 |
| Sample_C1B_k141_98228             | 6190   | 9   | 1 | 1  | Low-quality | 2.95 |
| Sample_T12C_k141_44483_fragment_1 | 6480   | 8   | 2 | 1  | Low-quality | 2.95 |
| Sample_T6A_k141_231477            | 5393   | 7   | 0 | 0  | Low-quality | 2.95 |
| Sample_C12A_k141_91229            | 6333   | 6   | 0 | 4  | Low-quality | 2.94 |
| Sample_T10A_k141_55479            | 5127   | 4   | 0 | 3  | Low-quality | 2.94 |
| Sample_T10B_k141_163043           | 6579   | 7   | 0 | 4  | Low-quality | 2.94 |
| Sample_T6A_k141_296813            | 8128   | 7   | 1 | 1  | Low-quality | 2.94 |
| Sample_C11A_k141_152690           | 5149   | 14  | 0 | 0  | Low-quality | 2.94 |
| Sample_C9C_k141_33723             | 6539   | 4   | 1 | 0  | Low-quality | 2.94 |
| Sample_T7C_k141_122521            | 7167   | 7   | 2 | 0  | Low-quality | 2.94 |
| Sample_C10C_k141_97821            | 5118   | 3   | 0 | 3  | Low-quality | 2.93 |
| Sample_C8B_k141_90468             | 5143   | 14  | 0 | 1  | Low-quality | 2.93 |
| Sample_C12A_k141_26161            | 5100   | 6   | 0 | 5  | Low-quality | 2.92 |
| Sample_C12A_k141_19083            | 5383   | 11  | 1 | 0  | Low-quality | 2.92 |
| Sample_T13B_k141_181867           | 8753   | 7   | 0 | 5  | Low-quality | 2.92 |



|                                   |       |    |   |    |             |      |
|-----------------------------------|-------|----|---|----|-------------|------|
| Sample_T4B_k141_215669            | 5792  | 5  | 0 | 1  | Low-quality | 2.92 |
| Sample_T5C_k141_21654             | 64069 | 66 | 1 | 43 | Low-quality | 2.92 |
| Sample_T6A_k141_250286            | 5220  | 4  | 1 | 3  | Low-quality | 2.92 |
| Sample_T7A_k141_15705             | 9244  | 9  | 0 | 3  | Low-quality | 2.92 |
| Sample_C10C_k141_56941            | 5289  | 2  | 0 | 2  | Low-quality | 2.91 |
| Sample_C13B_k141_79828            | 5335  | 3  | 1 | 0  | Low-quality | 2.91 |
| Sample_C9A_k141_83674             | 5217  | 4  | 0 | 0  | Low-quality | 2.91 |
| Sample_T7A_k141_83269             | 5040  | 10 | 2 | 1  | Low-quality | 2.91 |
| Sample_C4C_k141_159606            | 15718 | 13 | 1 | 2  | Low-quality | 2.9  |
| Sample_C12B_k141_176296           | 7641  | 6  | 0 | 0  | Low-quality | 2.9  |
| Sample_T8A_k141_106329            | 5209  | 14 | 1 | 0  | Low-quality | 2.9  |
| Sample_T2B_k141_225763            | 6223  | 9  | 0 | 1  | Low-quality | 2.89 |
| Sample_C2C_k141_284980            | 5004  | 7  | 1 | 0  | Low-quality | 2.89 |
| Sample_C6A_k141_42940             | 5188  | 6  | 1 | 0  | Low-quality | 2.89 |
| Sample_C9B_k141_69323             | 5217  | 10 | 4 | 0  | Low-quality | 2.89 |
| Sample_C5A_k141_121681            | 7666  | 5  | 0 | 4  | Low-quality | 2.88 |
| Sample_T12C_k141_61405            | 15566 | 12 | 0 | 8  | Low-quality | 2.88 |
| Sample_T13B_k141_167003           | 9635  | 10 | 1 | 4  | Low-quality | 2.88 |
| Sample_C10A_k141_62441            | 6235  | 8  | 1 | 1  | Low-quality | 2.88 |
| Sample_C6B_k141_99372             | 5385  | 9  | 2 | 1  | Low-quality | 2.88 |
| Sample_C2B_k141_116733            | 5727  | 6  | 0 | 3  | Low-quality | 2.87 |
| Sample_T16C_k141_3052             | 11181 | 12 | 0 | 10 | Low-quality | 2.87 |
| Sample_T2A_k141_184833            | 5298  | 11 | 1 | 1  | Low-quality | 2.87 |
| Sample_C9A_k141_127058            | 5066  | 14 | 1 | 0  | Low-quality | 2.87 |
| Sample_T7C_k141_82525             | 7864  | 12 | 0 | 0  | Low-quality | 2.87 |
| Sample_C4C_k141_166281            | 5682  | 7  | 0 | 7  | Low-quality | 2.86 |
| Sample_C8C_k141_172922            | 7404  | 6  | 2 | 1  | Low-quality | 2.86 |
| Sample_T3C_k141_119871            | 5395  | 4  | 0 | 2  | Low-quality | 2.86 |
| Sample_T4C_k141_65573             | 5278  | 2  | 0 | 2  | Low-quality | 2.86 |
| Sample_T5A_k141_4734_fragment_1   | 5493  | 8  | 1 | 0  | Low-quality | 2.86 |
| Sample_T18A_k141_170328           | 5459  | 5  | 0 | 4  | Low-quality | 2.85 |
| Sample_T3B_k141_104453            | 5027  | 1  | 1 | 0  | Low-quality | 2.85 |
| Sample_C12C_k141_194614           | 6166  | 8  | 4 | 2  | Low-quality | 2.84 |
| Sample_C9C_k141_13049             | 5164  | 7  | 0 | 0  | Low-quality | 2.84 |
| Sample_T12B_k141_56435            | 6523  | 7  | 0 | 4  | Low-quality | 2.84 |
| Sample_T8A_k141_85143             | 9700  | 9  | 0 | 9  | Low-quality | 2.84 |
| Sample_T10A_k141_85968_fragment_2 | 10442 | 9  | 1 | 1  | Low-quality | 2.84 |
| Sample_T2B_k141_296194            | 5354  | 8  | 1 | 1  | Low-quality | 2.84 |
| Sample_C10C_k141_62411            | 7014  | 4  | 1 | 1  | Low-quality | 2.83 |

|                                    |       |    |   |    |             |      |
|------------------------------------|-------|----|---|----|-------------|------|
| Sample_T18A_k141_203106            | 6927  | 6  | 2 | 1  | Low-quality | 2.83 |
| Sample_T13B_k141_104759            | 5650  | 7  | 1 | 1  | Low-quality | 2.82 |
| Sample_T18A_k141_43716             | 40131 | 35 | 3 | 12 | Low-quality | 2.82 |
| Sample_T8C_k141_71812              | 5193  | 8  | 1 | 0  | Low-quality | 2.82 |
| Sample_C4C_k141_15448              | 6299  | 8  | 1 | 1  | Low-quality | 2.82 |
| Sample_C8B_k141_44559              | 5725  | 5  | 0 | 1  | Low-quality | 2.82 |
| Sample_C14C_k141_112597            | 5181  | 6  | 1 | 0  | Low-quality | 2.81 |
| Sample_C14B_k141_81028             | 5039  | 5  | 1 | 0  | Low-quality | 2.81 |
| Sample_C2B_k141_104013             | 5500  | 11 | 3 | 0  | Low-quality | 2.81 |
| Sample_C11A_k141_19625             | 5373  | 19 | 0 | 1  | Low-quality | 2.8  |
| Sample_C2B_k141_304154             | 6494  | 9  | 1 | 0  | Low-quality | 2.8  |
| Sample_C6B_k141_129737             | 8116  | 11 | 0 | 8  | Low-quality | 2.8  |
| Sample_C11A_k141_10952_fragment_2  | 12902 | 8  | 1 | 3  | Low-quality | 2.8  |
| Sample_C14B_k141_47701             | 6034  | 21 | 1 | 0  | Low-quality | 2.8  |
| Sample_T12B_k141_29091             | 5102  | 9  | 3 | 0  | Low-quality | 2.8  |
| Sample_T8C_k141_51709_fragment_1   | 8292  | 10 | 2 | 2  | Low-quality | 2.8  |
| Sample_C2C_k141_98561              | 16570 | 10 | 0 | 5  | Low-quality | 2.79 |
| Sample_C5A_k141_17380              | 5314  | 8  | 0 | 3  | Low-quality | 2.79 |
| Sample_C8C_k141_149864             | 7900  | 3  | 0 | 2  | Low-quality | 2.79 |
| Sample_T17B_k141_34813             | 6438  | 6  | 0 | 5  | Low-quality | 2.79 |
| Sample_T1A_k141_15297              | 5222  | 3  | 0 | 2  | Low-quality | 2.79 |
| Sample_T1C_k141_8405               | 9350  | 9  | 1 | 2  | Low-quality | 2.79 |
| Sample_C9A_k141_13147              | 6022  | 8  | 0 | 0  | Low-quality | 2.79 |
| Sample_C12A_k141_14249             | 15467 | 16 | 0 | 13 | Low-quality | 2.78 |
| Sample_C4B_k141_212150             | 11859 | 11 | 0 | 10 | Low-quality | 2.78 |
| Sample_C5A_k141_243307             | 5731  | 6  | 0 | 1  | Low-quality | 2.77 |
| Sample_C5A_k141_172205             | 5453  | 5  | 0 | 4  | Low-quality | 2.77 |
| Sample_T15A_k141_113647            | 6404  | 7  | 1 | 0  | Low-quality | 2.76 |
| Sample_C1B_k141_200943             | 5917  | 14 | 0 | 0  | Low-quality | 2.75 |
| Sample_T16C_k141_44312             | 5448  | 5  | 0 | 2  | Low-quality | 2.75 |
| Sample_T7C_k141_118844             | 5202  | 8  | 2 | 0  | Low-quality | 2.75 |
| Sample_C8B_k141_88018              | 10584 | 7  | 0 | 7  | Low-quality | 2.74 |
| Sample_C1C_k141_194740             | 5141  | 7  | 1 | 0  | Low-quality | 2.74 |
| Sample_C5A_k141_226693             | 10402 | 15 | 1 | 0  | Low-quality | 2.74 |
| Sample_T5C_k141_155766             | 6370  | 13 | 1 | 2  | Low-quality | 2.74 |
| Sample_T7A_k141_100555             | 5376  | 14 | 1 | 1  | Low-quality | 2.74 |
| Sample_T4B_k141_184277             | 14781 | 14 | 1 | 3  | Low-quality | 2.73 |
| Sample_T8B_k141_159445             | 6961  | 8  | 1 | 1  | Low-quality | 2.73 |
| Sample_T14B_k141_158921_fragment_1 | 6937  | 9  | 1 | 1  | Low-quality | 2.73 |

|                                    |       |    |   |    |             |      |
|------------------------------------|-------|----|---|----|-------------|------|
| Sample_C1B_k141_234223             | 5383  | 4  | 0 | 3  | Low-quality | 2.72 |
| Sample_C2B_k141_286836             | 5811  | 5  | 0 | 4  | Low-quality | 2.72 |
| Sample_T10A_k141_160109_fragment_2 | 7255  | 9  | 2 | 0  | Low-quality | 2.72 |
| Sample_T2B_k141_108574             | 5853  | 15 | 2 | 0  | Low-quality | 2.72 |
| Sample_T8C_k141_26230              | 5416  | 8  | 1 | 1  | Low-quality | 2.72 |
| Sample_C14B_k141_79233             | 5831  | 12 | 1 | 0  | Low-quality | 2.71 |
| Sample_C4A_k141_94187              | 7054  | 11 | 1 | 2  | Low-quality | 2.71 |
| Sample_T13C_k141_9694              | 8573  | 5  | 0 | 5  | Low-quality | 2.7  |
| Sample_T14A_k141_191715            | 5745  | 9  | 1 | 1  | Low-quality | 2.7  |
| Sample_C10B_k141_68599             | 6260  | 10 | 1 | 1  | Low-quality | 2.69 |
| Sample_C2A_k141_217478             | 5535  | 12 | 0 | 0  | Low-quality | 2.69 |
| Sample_C3C_k141_173618             | 38822 | 40 | 2 | 22 | Low-quality | 2.69 |
| Sample_C5C_k141_621                | 6403  | 3  | 0 | 0  | Low-quality | 2.69 |
| Sample_T15C_k141_77894             | 7527  | 10 | 1 | 3  | Low-quality | 2.69 |
| Sample_C11C_k141_35766_fragment_2  | 5463  | 8  | 1 | 0  | Low-quality | 2.69 |
| Sample_C6C_k141_66048              | 8397  | 5  | 0 | 5  | Low-quality | 2.68 |
| Sample_C9C_k141_70313              | 6569  | 4  | 0 | 2  | Low-quality | 2.68 |
| Sample_T6C_k141_19782              | 10063 | 13 | 0 | 9  | Low-quality | 2.68 |
| Sample_T3B_k141_72029              | 5329  | 5  | 1 | 1  | Low-quality | 2.68 |
| Sample_T4B_k141_151471             | 5893  | 6  | 1 | 1  | Low-quality | 2.67 |
| Sample_C3C_k141_220683             | 7935  | 10 | 1 | 2  | Low-quality | 2.66 |
| Sample_T10B_k141_138535            | 6597  | 7  | 1 | 1  | Low-quality | 2.66 |
| Sample_T10B_k141_55113             | 6330  | 7  | 1 | 1  | Low-quality | 2.66 |
| Sample_C5C_k141_109398             | 5875  | 5  | 1 | 0  | Low-quality | 2.65 |
| Sample_T14A_k141_137289            | 5340  | 5  | 0 | 2  | Low-quality | 2.65 |
| Sample_T16B_k141_111387            | 14154 | 11 | 0 | 6  | Low-quality | 2.65 |
| Sample_T7B_k141_8507               | 10368 | 3  | 0 | 3  | Low-quality | 2.65 |
| Sample_T10A_k141_149207            | 7177  | 6  | 0 | 5  | Low-quality | 2.64 |
| Sample_T15B_k141_94170             | 9760  | 4  | 0 | 4  | Low-quality | 2.64 |
| Sample_T16A_k141_34584             | 11640 | 8  | 1 | 2  | Low-quality | 2.64 |
| Sample_T4B_k141_130155             | 8325  | 9  | 0 | 5  | Low-quality | 2.64 |
| Sample_T8A_k141_231923             | 7616  | 2  | 0 | 2  | Low-quality | 2.64 |
| Sample_C11B_k141_104041            | 6474  | 9  | 1 | 1  | Low-quality | 2.64 |
| Sample_C1A_k141_69003              | 5978  | 4  | 0 | 2  | Low-quality | 2.63 |
| Sample_C2A_k141_185488             | 31077 | 33 | 1 | 8  | Low-quality | 2.63 |
| Sample_T6C_k141_114158             | 15632 | 15 | 0 | 12 | Low-quality | 2.63 |
| Sample_C8A_k141_174191             | 6536  | 5  | 1 | 0  | Low-quality | 2.63 |
| Sample_C12A_k141_130430            | 7519  | 9  | 1 | 4  | Low-quality | 2.62 |
| Sample_C4B_k141_79607              | 5126  | 10 | 1 | 2  | Low-quality | 2.62 |

|                                   |       |    |   |    |             |      |
|-----------------------------------|-------|----|---|----|-------------|------|
| Sample_T4C_k141_35604             | 5261  | 2  | 0 | 2  | Low-quality | 2.62 |
| Sample_T2C_k141_196565            | 6081  | 11 | 1 | 1  | Low-quality | 2.62 |
| Sample_T6A_k141_217899            | 5573  | 4  | 1 | 1  | Low-quality | 2.62 |
| Sample_C1A_k141_7490              | 5642  | 13 | 2 | 0  | Low-quality | 2.61 |
| Sample_C6B_k141_2232              | 6303  | 10 | 1 | 2  | Low-quality | 2.61 |
| Sample_C8C_k141_175724_fragment_1 | 20489 | 10 | 1 | 5  | Low-quality | 2.61 |
| Sample_C8C_k141_99339             | 10283 | 6  | 0 | 6  | Low-quality | 2.6  |
| Sample_T11A_k141_65498            | 5501  | 5  | 0 | 5  | Low-quality | 2.6  |
| Sample_T6B_k141_151908            | 14360 | 14 | 0 | 13 | Low-quality | 2.6  |
| Sample_T14A_k141_7604             | 6940  | 11 | 1 | 1  | Low-quality | 2.6  |
| Sample_C2B_k141_16798             | 5122  | 6  | 0 | 4  | Low-quality | 2.59 |
| Sample_C7B_k141_103950            | 6780  | 8  | 1 | 1  | Low-quality | 2.59 |
| Sample_T15C_k141_91760            | 5577  | 7  | 0 | 0  | Low-quality | 2.59 |
| Sample_T16B_k141_26315            | 5084  | 7  | 2 | 1  | Low-quality | 2.59 |
| Sample_T8B_k141_209775            | 5340  | 8  | 0 | 6  | Low-quality | 2.59 |
| Sample_C10C_k141_61336            | 5224  | 3  | 0 | 2  | Low-quality | 2.58 |
| Sample_C2B_k141_346221            | 5136  | 6  | 0 | 2  | Low-quality | 2.58 |
| Sample_T12A_k141_5948             | 7798  | 7  | 0 | 4  | Low-quality | 2.57 |
| Sample_T3B_k141_6359              | 5054  | 11 | 1 | 0  | Low-quality | 2.57 |
| Sample_C1C_k141_25763             | 8501  | 3  | 0 | 3  | Low-quality | 2.56 |
| Sample_T4A_k141_31648             | 8861  | 4  | 0 | 3  | Low-quality | 2.56 |
| Sample_T7C_k141_111714            | 5229  | 7  | 0 | 4  | Low-quality | 2.56 |
| Sample_T11A_k141_56197            | 9729  | 13 | 1 | 1  | Low-quality | 2.56 |
| Sample_C9A_k141_94804             | 6165  | 4  | 0 | 3  | Low-quality | 2.55 |
| Sample_T3C_k141_34605             | 5283  | 2  | 0 | 0  | Low-quality | 2.55 |
| Sample_C9A_k141_66339             | 5498  | 10 | 1 | 0  | Low-quality | 2.55 |
| Sample_C10A_k141_320607           | 6139  | 5  | 0 | 1  | Low-quality | 2.54 |
| Sample_C2C_k141_79646             | 9012  | 7  | 1 | 1  | Low-quality | 2.54 |
| Sample_C14C_k141_171848           | 5178  | 6  | 0 | 6  | Low-quality | 2.53 |
| Sample_T16B_k141_163722           | 5936  | 8  | 0 | 8  | Low-quality | 2.53 |
| Sample_T4B_k141_32754             | 5250  | 3  | 0 | 2  | Low-quality | 2.52 |
| Sample_T10A_k141_166717           | 5345  | 7  | 0 | 1  | Low-quality | 2.52 |
| Sample_T2B_k141_55675             | 7655  | 8  | 0 | 4  | Low-quality | 2.51 |
| Sample_T3A_k141_89742             | 7019  | 5  | 1 | 2  | Low-quality | 2.51 |
| Sample_T6B_k141_155694            | 8181  | 7  | 0 | 2  | Low-quality | 2.51 |
| Sample_C4A_k141_141681            | 5979  | 8  | 2 | 1  | Low-quality | 2.51 |
| Sample_C11A_k141_69438            | 7094  | 4  | 0 | 3  | Low-quality | 2.5  |
| Sample_C13B_k141_62702            | 9772  | 8  | 0 | 3  | Low-quality | 2.5  |
| Sample_T10B_k141_85200            | 8592  | 4  | 0 | 4  | Low-quality | 2.5  |

|                                   |       |    |   |    |             |      |
|-----------------------------------|-------|----|---|----|-------------|------|
| Sample_T12A_k141_58747            | 15505 | 16 | 1 | 9  | Low-quality | 2.5  |
| Sample_T4B_k141_217066            | 6066  | 8  | 1 | 0  | Low-quality | 2.5  |
| Sample_C3B_k141_149099            | 9621  | 14 | 1 | 3  | Low-quality | 2.49 |
| Sample_T12A_k141_195946           | 6198  | 4  | 1 | 1  | Low-quality | 2.49 |
| Sample_C2A_k141_263823_fragment_1 | 7012  | 8  | 1 | 1  | Low-quality | 2.48 |
| Sample_T16A_k141_72088            | 9559  | 8  | 1 | 1  | Low-quality | 2.48 |
| Sample_T2B_k141_52615             | 5856  | 7  | 0 | 5  | Low-quality | 2.47 |
| Sample_T4B_k141_11962             | 44736 | 45 | 2 | 27 | Low-quality | 2.47 |
| Sample_T16B_k141_63407            | 6149  | 4  | 1 | 2  | Low-quality | 2.46 |
| Sample_T2C_k141_275389            | 5320  | 6  | 0 | 0  | Low-quality | 2.46 |
| Sample_C1B_k141_37848             | 5290  | 10 | 2 | 0  | Low-quality | 2.46 |
| Sample_T15C_k141_89499            | 5020  | 8  | 1 | 0  | Low-quality | 2.46 |
| Sample_C4A_k141_127654            | 18072 | 17 | 0 | 16 | Low-quality | 2.45 |
| Sample_T13A_k141_78917            | 9053  | 5  | 0 | 2  | Low-quality | 2.45 |
| Sample_T2B_k141_110597            | 5606  | 6  | 0 | 3  | Low-quality | 2.45 |
| Sample_T8B_k141_157715            | 5094  | 4  | 0 | 3  | Low-quality | 2.45 |
| Sample_C9A_k141_90870             | 9323  | 9  | 1 | 1  | Low-quality | 2.45 |
| Sample_T11A_k141_62976            | 5712  | 6  | 1 | 0  | Low-quality | 2.45 |
| Sample_T12A_k141_74912            | 5968  | 6  | 0 | 0  | Low-quality | 2.45 |
| Sample_T8B_k141_206959            | 6181  | 6  | 2 | 1  | Low-quality | 2.45 |
| Sample_C10C_k141_158133           | 5558  | 7  | 0 | 6  | Low-quality | 2.44 |
| Sample_T16B_k141_127113           | 5329  | 5  | 0 | 2  | Low-quality | 2.44 |
| Sample_C9B_k141_16981             | 10059 | 7  | 1 | 2  | Low-quality | 2.43 |
| Sample_T4C_k141_99774             | 5280  | 5  | 0 | 1  | Low-quality | 2.43 |
| Sample_C6C_k141_21026             | 5067  | 7  | 4 | 0  | Low-quality | 2.43 |
| Sample_C8B_k141_84747             | 6068  | 9  | 1 | 0  | Low-quality | 2.43 |
| Sample_T16C_k141_64856            | 6733  | 10 | 1 | 0  | Low-quality | 2.43 |
| Sample_T3C_k141_141870            | 7113  | 9  | 1 | 1  | Low-quality | 2.43 |
| Sample_T4B_k141_164967            | 6429  | 5  | 1 | 2  | Low-quality | 2.42 |
| Sample_T12A_k141_116036           | 6419  | 8  | 2 | 2  | Low-quality | 2.42 |
| Sample_C8C_k141_56169             | 5025  | 11 | 2 | 0  | Low-quality | 2.41 |
| Sample_C13C_k141_68295            | 5813  | 4  | 0 | 3  | Low-quality | 2.4  |
| Sample_C8C_k141_31194             | 6180  | 6  | 1 | 1  | Low-quality | 2.4  |
| Sample_C2B_k141_8038              | 8555  | 6  | 0 | 6  | Low-quality | 2.39 |
| Sample_C8B_k141_696               | 9367  | 1  | 0 | 1  | Low-quality | 2.39 |
| Sample_T7A_k141_5103              | 11104 | 7  | 1 | 2  | Low-quality | 2.39 |
| Sample_C7B_k141_95298_fragment_1  | 7912  | 8  | 0 | 3  | Low-quality | 2.39 |
| Sample_C5C_k141_17321             | 5052  | 6  | 0 | 6  | Low-quality | 2.38 |
| Sample_C7C_k141_29668             | 5766  | 4  | 0 | 4  | Low-quality | 2.38 |

|                                  |       |    |   |   |             |      |
|----------------------------------|-------|----|---|---|-------------|------|
| Sample_T3B_k141_125972           | 5350  | 4  | 0 | 2 | Low-quality | 2.38 |
| Sample_C4C_k141_15550_fragment_1 | 8013  | 10 | 2 | 1 | Low-quality | 2.38 |
| Sample_T2C_k141_179845           | 7307  | 8  | 2 | 0 | Low-quality | 2.38 |
| Sample_C1B_k141_41731            | 7081  | 5  | 0 | 5 | Low-quality | 2.37 |
| Sample_C6B_k141_47114            | 8651  | 11 | 1 | 2 | Low-quality | 2.37 |
| Sample_T3A_k141_69683            | 6899  | 5  | 0 | 3 | Low-quality | 2.37 |
| Sample_C4B_k141_245658           | 5023  | 5  | 1 | 2 | Low-quality | 2.37 |
| Sample_C12A_k141_25635           | 5621  | 5  | 1 | 3 | Low-quality | 2.36 |
| Sample_T11B_k141_51240           | 9306  | 4  | 0 | 4 | Low-quality | 2.36 |
| Sample_T4C_k141_82657_fragment_2 | 7766  | 8  | 0 | 3 | Low-quality | 2.36 |
| Sample_C3C_k141_27196            | 7435  | 7  | 1 | 1 | Low-quality | 2.35 |
| Sample_T2B_k141_15264            | 10369 | 11 | 2 | 2 | Low-quality | 2.35 |
| Sample_T15A_k141_118890          | 10901 | 10 | 0 | 5 | Low-quality | 2.34 |
| Sample_T7C_k141_88908            | 8520  | 6  | 0 | 5 | Low-quality | 2.34 |
| Sample_C5C_k141_84669            | 7482  | 9  | 1 | 1 | Low-quality | 2.34 |
| Sample_T11C_k141_1851            | 11585 | 9  | 1 | 2 | Low-quality | 2.34 |
| Sample_T11C_k141_59004           | 15575 | 16 | 0 | 8 | Low-quality | 2.33 |
| Sample_T13C_k141_80074           | 5642  | 5  | 0 | 3 | Low-quality | 2.33 |
| Sample_T15B_k141_16614           | 12414 | 8  | 0 | 8 | Low-quality | 2.33 |
| Sample_C11C_k141_27828           | 5067  | 3  | 0 | 1 | Low-quality | 2.32 |
| Sample_C7C_k141_2051             | 5773  | 11 | 1 | 0 | Low-quality | 2.32 |
| Sample_T3B_k141_13675            | 6153  | 7  | 1 | 1 | Low-quality | 2.32 |
| Sample_C12B_k141_95025           | 6991  | 3  | 0 | 2 | Low-quality | 2.31 |
| Sample_C13A_k141_24844           | 8751  | 3  | 0 | 1 | Low-quality | 2.31 |
| Sample_T12C_k141_89235           | 5807  | 5  | 0 | 3 | Low-quality | 2.31 |
| Sample_C5A_k141_236109           | 5532  | 4  | 1 | 1 | Low-quality | 2.3  |
| Sample_C8C_k141_3996             | 5372  | 4  | 0 | 1 | Low-quality | 2.3  |
| Sample_T8C_k141_217583           | 5106  | 6  | 1 | 0 | Low-quality | 2.3  |
| Sample_C7A_k141_31221            | 8155  | 11 | 1 | 2 | Low-quality | 2.29 |
| Sample_C8C_k141_164455           | 12931 | 13 | 0 | 7 | Low-quality | 2.29 |
| Sample_T3A_k141_3052             | 6446  | 8  | 1 | 2 | Low-quality | 2.29 |
| Sample_C12C_k141_169140          | 7998  | 3  | 0 | 2 | Low-quality | 2.28 |
| Sample_C2A_k141_91105            | 5258  | 6  | 0 | 2 | Low-quality | 2.28 |
| Sample_C2C_k141_85818            | 11412 | 9  | 1 | 3 | Low-quality | 2.28 |
| Sample_T3B_k141_123620           | 10639 | 13 | 1 | 6 | Low-quality | 2.28 |
| Sample_T17C_k141_13816           | 5125  | 7  | 1 | 0 | Low-quality | 2.28 |
| Sample_C1C_k141_61592            | 16068 | 14 | 0 | 9 | Low-quality | 2.27 |
| Sample_C2C_k141_29230            | 5060  | 3  | 0 | 0 | Low-quality | 2.27 |
| Sample_C3A_k141_81706            | 5746  | 3  | 0 | 3 | Low-quality | 2.27 |

|                                   |       |    |   |   |             |      |
|-----------------------------------|-------|----|---|---|-------------|------|
| Sample_T8A_k141_114891            | 11778 | 10 | 2 | 2 | Low-quality | 2.27 |
| Sample_T12B_k141_134668           | 8913  | 13 | 2 | 2 | Low-quality | 2.26 |
| Sample_T4B_k141_286239            | 6657  | 7  | 1 | 1 | Low-quality | 2.26 |
| Sample_C8C_k141_167685            | 7517  | 8  | 0 | 5 | Low-quality | 2.25 |
| Sample_C4C_k141_101887_fragment_1 | 7742  | 8  | 0 | 3 | Low-quality | 2.25 |
| Sample_C6C_k141_223972            | 5612  | 5  | 1 | 0 | Low-quality | 2.25 |
| Sample_T4C_k141_53436             | 5117  | 7  | 1 | 1 | Low-quality | 2.25 |
| Sample_T4B_k141_133042            | 6386  | 5  | 1 | 2 | Low-quality | 2.23 |
| Sample_C2C_k141_283117            | 8148  | 9  | 1 | 0 | Low-quality | 2.23 |
| Sample_C6B_k141_201576            | 8119  | 10 | 1 | 3 | Low-quality | 2.22 |
| Sample_C4C_k141_29802             | 6667  | 9  | 1 | 2 | Low-quality | 2.21 |
| Sample_T10B_k141_104514           | 5345  | 4  | 0 | 4 | Low-quality | 2.21 |
| Sample_T7A_k141_55719             | 8546  | 10 | 1 | 0 | Low-quality | 2.21 |
| Sample_C1B_k141_51334             | 5399  | 4  | 1 | 1 | Low-quality | 2.21 |
| Sample_T6A_k141_85219             | 5537  | 10 | 1 | 1 | Low-quality | 2.21 |
| Sample_T4B_k141_61008             | 11967 | 13 | 1 | 4 | Low-quality | 2.2  |
| Sample_C2C_k141_35060             | 8351  | 9  | 1 | 2 | Low-quality | 2.19 |
| Sample_C10B_k141_17263            | 5400  | 5  | 0 | 2 | Low-quality | 2.18 |
| Sample_T16B_k141_57881            | 5449  | 6  | 1 | 3 | Low-quality | 2.18 |
| Sample_C2B_k141_199785            | 5467  | 6  | 0 | 3 | Low-quality | 2.17 |
| Sample_T10A_k141_93902            | 13523 | 9  | 1 | 4 | Low-quality | 2.17 |
| Sample_T7A_k141_8060              | 7942  | 10 | 0 | 6 | Low-quality | 2.17 |
| Sample_C13C_k141_94486            | 5175  | 3  | 0 | 1 | Low-quality | 2.16 |
| Sample_C4C_k141_245509            | 6600  | 2  | 1 | 1 | Low-quality | 2.16 |
| Sample_T18B_k141_1223             | 7708  | 6  | 0 | 6 | Low-quality | 2.16 |
| Sample_T18C_k141_8953             | 8148  | 9  | 0 | 4 | Low-quality | 2.16 |
| Sample_C10C_k141_187570           | 7801  | 3  | 0 | 2 | Low-quality | 2.15 |
| Sample_T13A_k141_28398            | 8194  | 3  | 0 | 3 | Low-quality | 2.15 |
| Sample_C3A_k141_120285            | 5849  | 5  | 0 | 3 | Low-quality | 2.14 |
| Sample_C3A_k141_75544             | 7532  | 6  | 1 | 1 | Low-quality | 2.14 |
| Sample_T12C_k141_31051            | 7133  | 7  | 1 | 1 | Low-quality | 2.14 |
| Sample_C5C_k141_47727             | 6099  | 5  | 0 | 4 | Low-quality | 2.13 |
| Sample_T3B_k141_81720             | 5984  | 8  | 1 | 1 | Low-quality | 2.13 |
| Sample_T14B_k141_8505             | 12869 | 8  | 1 | 3 | Low-quality | 2.13 |
| Sample_T16C_k141_28651            | 5365  | 7  | 2 | 1 | Low-quality | 2.13 |
| Sample_C5A_k141_90678             | 6786  | 8  | 1 | 3 | Low-quality | 2.12 |
| Sample_T3A_k141_22509             | 10911 | 7  | 0 | 6 | Low-quality | 2.12 |
| Sample_T4B_k141_230038            | 12330 | 9  | 0 | 9 | Low-quality | 2.12 |
| Sample_T7B_k141_91806             | 7212  | 6  | 1 | 0 | Low-quality | 2.12 |

|                                    |       |     |   |    |             |      |
|------------------------------------|-------|-----|---|----|-------------|------|
| Sample_T14A_k141_101805            | 12451 | 9   | 0 | 4  | Low-quality | 2.11 |
| Sample_T8B_k141_100894             | 22656 | 24  | 0 | 16 | Low-quality | 2.11 |
| Sample_T6C_k141_202827             | 5535  | 5   | 1 | 1  | Low-quality | 2.11 |
| Sample_C1C_k141_137205             | 7999  | 5   | 0 | 5  | Low-quality | 2.1  |
| Sample_C12A_k141_60038             | 7356  | 4   | 1 | 2  | Low-quality | 2.09 |
| Sample_C7B_k141_174906             | 8950  | 10  | 1 | 3  | Low-quality | 2.09 |
| Sample_T7A_k141_79011              | 6910  | 10  | 1 | 3  | Low-quality | 2.09 |
| Sample_T7A_k141_217348             | 8904  | 8   | 0 | 7  | Low-quality | 2.09 |
| Sample_C11B_k141_234217_fragment_1 | 86628 | 105 | 5 | 10 | Low-quality | 2.09 |
| Sample_C8A_k141_85004              | 7768  | 6   | 0 | 5  | Low-quality | 2.08 |
| Sample_T6A_k141_280828             | 5021  | 3   | 0 | 3  | Low-quality | 2.08 |
| Sample_C1C_k141_46149              | 5393  | 5   | 1 | 1  | Low-quality | 2.07 |
| Sample_T12A_k141_216029            | 8466  | 2   | 0 | 2  | Low-quality | 2.07 |
| Sample_T15A_k141_95189             | 5270  | 4   | 0 | 3  | Low-quality | 2.07 |
| Sample_T7C_k141_125172             | 5675  | 12  | 1 | 0  | Low-quality | 2.07 |
| Sample_T15B_k141_16530             | 6321  | 6   | 1 | 1  | Low-quality | 2.06 |
| Sample_C9C_k141_73096              | 6120  | 6   | 1 | 2  | Low-quality | 2.06 |
| Sample_C10A_k141_214664            | 7796  | 9   | 1 | 0  | Low-quality | 2.05 |
| Sample_C12C_k141_164888            | 5875  | 6   | 1 | 1  | Low-quality | 2.05 |
| Sample_C13B_k141_53754             | 12870 | 11  | 0 | 10 | Low-quality | 2.04 |
| Sample_T7B_k141_95208              | 5136  | 5   | 0 | 2  | Low-quality | 2.04 |
| Sample_C12C_k141_154286            | 9847  | 6   | 1 | 1  | Low-quality | 2.04 |
| Sample_T8B_k141_58674_fragment_2   | 10331 | 8   | 0 | 3  | Low-quality | 2.03 |
| Sample_C12A_k141_44061             | 5458  | 10  | 1 | 1  | Low-quality | 2.02 |
| Sample_T7C_k141_118578             | 5529  | 4   | 1 | 0  | Low-quality | 2.02 |
| Sample_T4B_k141_35792              | 7118  | 7   | 0 | 6  | Low-quality | 2.01 |
| Sample_C10C_k141_117438            | 8629  | 5   | 1 | 2  | Low-quality | 2    |
| Sample_C14C_k141_12679             | 5012  | 2   | 0 | 1  | Low-quality | 2    |
| Sample_C7C_k141_42571              | 5594  | 9   | 1 | 0  | Low-quality | 2    |
| Sample_T12A_k141_231466            | 7823  | 9   | 0 | 8  | Low-quality | 1.99 |
| Sample_C11B_k141_16878             | 12941 | 13  | 0 | 11 | Low-quality | 1.98 |
| Sample_T2B_k141_257093             | 7713  | 2   | 0 | 2  | Low-quality | 1.97 |
| Sample_T7A_k141_92125              | 12657 | 12  | 0 | 11 | Low-quality | 1.97 |
| Sample_C7B_k141_134443             | 5589  | 8   | 1 | 1  | Low-quality | 1.97 |
| Sample_C4B_k141_200743             | 5336  | 6   | 0 | 6  | Low-quality | 1.96 |
| Sample_C1B_k141_189580             | 6786  | 3   | 0 | 3  | Low-quality | 1.95 |
| Sample_T12C_k141_113               | 5290  | 13  | 1 | 1  | Low-quality | 1.95 |
| Sample_C5A_k141_265815             | 6075  | 8   | 0 | 4  | Low-quality | 1.94 |
| Sample_T12A_k141_150400            | 7681  | 7   | 0 | 5  | Low-quality | 1.94 |



|                                   |       |    |   |    |             |      |
|-----------------------------------|-------|----|---|----|-------------|------|
| Sample_T8A_k141_93408             | 8071  | 8  | 0 | 5  | Low-quality | 1.94 |
| Sample_C10A_k141_37689            | 5353  | 7  | 1 | 1  | Low-quality | 1.94 |
| Sample_T5A_k141_36469             | 7358  | 9  | 1 | 0  | Low-quality | 1.94 |
| Sample_T12C_k141_86232            | 12031 | 12 | 2 | 3  | Low-quality | 1.93 |
| Sample_T5C_k141_126186            | 5999  | 9  | 1 | 2  | Low-quality | 1.93 |
| Sample_T6C_k141_174234            | 10271 | 10 | 1 | 7  | Low-quality | 1.93 |
| Sample_T7C_k141_70825             | 5280  | 6  | 0 | 1  | Low-quality | 1.93 |
| Sample_C7C_k141_44463             | 7135  | 7  | 1 | 1  | Low-quality | 1.93 |
| Sample_T18B_k141_81939            | 6365  | 5  | 0 | 5  | Low-quality | 1.92 |
| Sample_C13B_k141_17059            | 5474  | 6  | 0 | 4  | Low-quality | 1.91 |
| Sample_C2B_k141_194878            | 7305  | 6  | 1 | 1  | Low-quality | 1.91 |
| Sample_C8A_k141_15738             | 8842  | 8  | 0 | 6  | Low-quality | 1.91 |
| Sample_T12A_k141_267619           | 6709  | 7  | 0 | 5  | Low-quality | 1.91 |
| Sample_T7C_k141_47254             | 5224  | 2  | 1 | 0  | Low-quality | 1.91 |
| Sample_C3A_k141_187900            | 7694  | 5  | 3 | 1  | Low-quality | 1.91 |
| Sample_T15A_k141_113728           | 7930  | 6  | 0 | 4  | Low-quality | 1.9  |
| Sample_T8C_k141_208459            | 11366 | 9  | 0 | 7  | Low-quality | 1.9  |
| Sample_T10B_k141_34991_fragment_1 | 7085  | 9  | 1 | 2  | Low-quality | 1.9  |
| Sample_T7C_k141_121644            | 5199  | 7  | 1 | 0  | Low-quality | 1.9  |
| Sample_C2C_k141_313565            | 19267 | 23 | 0 | 17 | Low-quality | 1.89 |
| Sample_C2B_k141_148411            | 20278 | 22 | 0 | 12 | Low-quality | 1.88 |
| Sample_T13B_k141_111942           | 6644  | 14 | 1 | 1  | Low-quality | 1.88 |
| Sample_C13B_k141_88463            | 7613  | 9  | 1 | 1  | Low-quality | 1.88 |
| Sample_C1B_k141_87857             | 5331  | 4  | 0 | 2  | Low-quality | 1.86 |
| Sample_C3A_k141_146060            | 5271  | 5  | 1 | 1  | Low-quality | 1.85 |
| Sample_C5C_k141_60212             | 9088  | 8  | 0 | 7  | Low-quality | 1.85 |
| Sample_C8A_k141_78102             | 11596 | 14 | 1 | 2  | Low-quality | 1.85 |
| Sample_T11C_k141_108253           | 10042 | 13 | 1 | 3  | Low-quality | 1.85 |
| Sample_T12A_k141_41004            | 7019  | 8  | 1 | 1  | Low-quality | 1.85 |
| Sample_T2A_k141_145827            | 6449  | 8  | 0 | 6  | Low-quality | 1.84 |
| Sample_C6A_k141_56367             | 11519 | 13 | 0 | 6  | Low-quality | 1.83 |
| Sample_T2A_k141_196495            | 7347  | 9  | 1 | 4  | Low-quality | 1.83 |
| Sample_C10A_k141_2955             | 5871  | 6  | 1 | 1  | Low-quality | 1.83 |
| Sample_C4C_k141_35025             | 6668  | 10 | 1 | 2  | Low-quality | 1.83 |
| Sample_C14C_k141_33861            | 5623  | 3  | 0 | 2  | Low-quality | 1.81 |
| Sample_T10A_k141_50674            | 46705 | 47 | 3 | 17 | Low-quality | 1.81 |
| Sample_C13A_k141_100745           | 5569  | 9  | 1 | 0  | Low-quality | 1.81 |
| Sample_C7B_k141_16129             | 5137  | 5  | 0 | 4  | Low-quality | 1.8  |
| Sample_T12A_k141_319396           | 6996  | 7  | 0 | 1  | Low-quality | 1.8  |

|                                   |       |    |   |    |             |      |
|-----------------------------------|-------|----|---|----|-------------|------|
| Sample_T2C_k141_29482_fragment_2  | 7220  | 9  | 2 | 1  | Low-quality | 1.8  |
| Sample_T7A_k141_55769             | 6763  | 7  | 1 | 2  | Low-quality | 1.8  |
| Sample_T6C_k141_16285             | 9419  | 9  | 0 | 8  | Low-quality | 1.79 |
| Sample_T8A_k141_184694            | 9902  | 7  | 0 | 4  | Low-quality | 1.77 |
| Sample_T12B_k141_83548            | 6825  | 14 | 2 | 0  | Low-quality | 1.77 |
| Sample_T8B_k141_262934            | 6960  | 6  | 0 | 5  | Low-quality | 1.76 |
| Sample_C5B_k141_87393             | 5833  | 4  | 1 | 1  | Low-quality | 1.76 |
| Sample_C4A_k141_81385             | 16272 | 14 | 0 | 11 | Low-quality | 1.75 |
| Sample_C4B_k141_90943             | 7388  | 12 | 2 | 4  | Low-quality | 1.75 |
| Sample_C9B_k141_97483             | 6059  | 7  | 0 | 5  | Low-quality | 1.75 |
| Sample_T10B_k141_111978           | 7172  | 3  | 0 | 3  | Low-quality | 1.75 |
| Sample_T18A_k141_103187           | 5935  | 6  | 1 | 1  | Low-quality | 1.75 |
| Sample_T4B_k141_195981            | 6669  | 4  | 1 | 2  | Low-quality | 1.75 |
| Sample_T4B_k141_39115             | 10137 | 7  | 1 | 2  | Low-quality | 1.75 |
| Sample_T10A_k141_97846            | 5078  | 5  | 1 | 0  | Low-quality | 1.73 |
| Sample_T2A_k141_198565            | 5234  | 6  | 1 | 2  | Low-quality | 1.72 |
| Sample_T4A_k141_99489             | 5852  | 6  | 0 | 4  | Low-quality | 1.72 |
| Sample_T4C_k141_119295            | 6686  | 3  | 0 | 2  | Low-quality | 1.72 |
| Sample_C5A_k141_95888             | 5380  | 6  | 1 | 1  | Low-quality | 1.71 |
| Sample_T12B_k141_77429            | 5172  | 9  | 1 | 1  | Low-quality | 1.71 |
| Sample_C12A_k141_116911           | 5269  | 6  | 0 | 3  | Low-quality | 1.7  |
| Sample_C7B_k141_123400            | 5862  | 4  | 1 | 1  | Low-quality | 1.7  |
| Sample_T12A_k141_60871            | 6328  | 3  | 0 | 3  | Low-quality | 1.69 |
| Sample_T18A_k141_96666            | 10444 | 9  | 0 | 8  | Low-quality | 1.69 |
| Sample_T10A_k141_141750           | 7819  | 13 | 1 | 0  | Low-quality | 1.68 |
| Sample_T3B_k141_157662_fragment_1 | 6657  | 8  | 1 | 2  | Low-quality | 1.68 |
| Sample_C10A_k141_121384           | 9956  | 11 | 0 | 6  | Low-quality | 1.67 |
| Sample_T10B_k141_176819           | 5671  | 3  | 0 | 3  | Low-quality | 1.67 |
| Sample_C6C_k141_227662            | 5033  | 4  | 0 | 3  | Low-quality | 1.66 |
| Sample_T4A_k141_63681             | 9673  | 6  | 0 | 4  | Low-quality | 1.66 |
| Sample_C1A_k141_52884             | 10055 | 10 | 0 | 4  | Low-quality | 1.65 |
| Sample_C3A_k141_175217            | 5525  | 7  | 1 | 1  | Low-quality | 1.64 |
| Sample_C6A_k141_112274            | 7983  | 10 | 2 | 2  | Low-quality | 1.64 |
| Sample_C3A_k141_206350            | 5031  | 6  | 0 | 2  | Low-quality | 1.62 |
| Sample_C10C_k141_133701           | 6234  | 12 | 1 | 3  | Low-quality | 1.61 |
| Sample_T11A_k141_22229            | 9563  | 8  | 0 | 8  | Low-quality | 1.61 |
| Sample_C2B_k141_51984             | 5770  | 9  | 2 | 1  | Low-quality | 1.61 |
| Sample_C2A_k141_89167             | 10046 | 9  | 0 | 6  | Low-quality | 1.6  |
| Sample_C4A_k141_44097             | 15285 | 14 | 2 | 4  | Low-quality | 1.6  |

|                         |       |    |   |   |             |      |
|-------------------------|-------|----|---|---|-------------|------|
| Sample_T5B_k141_73923   | 5585  | 2  | 0 | 2 | Low-quality | 1.6  |
| Sample_T6C_k141_61556   | 14308 | 13 | 1 | 8 | Low-quality | 1.6  |
| Sample_T8B_k141_262156  | 8866  | 8  | 0 | 7 | Low-quality | 1.6  |
| Sample_T14A_k141_153614 | 10385 | 11 | 0 | 1 | Low-quality | 1.6  |
| Sample_T11B_k141_117554 | 6067  | 3  | 0 | 2 | Low-quality | 1.59 |
| Sample_T7B_k141_96043   | 5743  | 4  | 1 | 2 | Low-quality | 1.59 |
| Sample_C10A_k141_82654  | 5015  | 6  | 1 | 2 | Low-quality | 1.58 |
| Sample_C1B_k141_151243  | 9012  | 7  | 0 | 6 | Low-quality | 1.58 |
| Sample_T4A_k141_87294   | 10258 | 11 | 0 | 2 | Low-quality | 1.58 |
| Sample_C3C_k141_197675  | 7256  | 7  | 1 | 3 | Low-quality | 1.57 |
| Sample_C5C_k141_7588    | 9693  | 7  | 0 | 5 | Low-quality | 1.56 |
| Sample_T18C_k141_138120 | 7595  | 9  | 1 | 1 | Low-quality | 1.56 |
| Sample_C1A_k141_37096   | 5716  | 5  | 0 | 4 | Low-quality | 1.55 |
| Sample_C6C_k141_27079   | 10404 | 7  | 0 | 6 | Low-quality | 1.55 |
| Sample_C7B_k141_8471    | 8952  | 9  | 1 | 3 | Low-quality | 1.55 |
| Sample_C9A_k141_12410   | 5987  | 7  | 1 | 1 | Low-quality | 1.55 |
| Sample_T16B_k141_27694  | 8997  | 7  | 0 | 6 | Low-quality | 1.55 |
| Sample_T2B_k141_64064   | 5807  | 5  | 0 | 2 | Low-quality | 1.55 |
| Sample_C2A_k141_81543   | 8024  | 4  | 1 | 1 | Low-quality | 1.54 |
| Sample_C5C_k141_48749   | 9655  | 10 | 0 | 8 | Low-quality | 1.53 |
| Sample_T8A_k141_62321   | 9089  | 12 | 0 | 3 | Low-quality | 1.52 |
| Sample_T3A_k141_35755   | 6450  | 4  | 0 | 4 | Low-quality | 1.51 |
| Sample_C2B_k141_72518   | 15432 | 14 | 0 | 7 | Low-quality | 1.5  |
| Sample_T4B_k141_319484  | 8707  | 7  | 0 | 4 | Low-quality | 1.5  |
| Sample_C2C_k141_34821   | 6173  | 10 | 1 | 1 | Low-quality | 1.5  |
| Sample_T14A_k141_32844  | 5388  | 10 | 2 | 3 | Low-quality | 1.5  |
| Sample_C4B_k141_201150  | 11867 | 10 | 1 | 4 | Low-quality | 1.49 |
| Sample_C10A_k141_87102  | 5167  | 8  | 0 | 5 | Low-quality | 1.48 |
| Sample_C12C_k141_213299 | 6249  | 6  | 0 | 2 | Low-quality | 1.48 |
| Sample_C1C_k141_137920  | 5594  | 4  | 0 | 3 | Low-quality | 1.48 |
| Sample_C4B_k141_1137    | 5719  | 10 | 1 | 1 | Low-quality | 1.48 |
| Sample_C9B_k141_101776  | 5576  | 7  | 1 | 2 | Low-quality | 1.47 |
| Sample_T11A_k141_86721  | 11134 | 10 | 1 | 3 | Low-quality | 1.46 |
| Sample_T14A_k141_76174  | 5549  | 8  | 1 | 0 | Low-quality | 1.46 |
| Sample_T15C_k141_93618  | 15923 | 9  | 0 | 7 | Low-quality | 1.46 |
| Sample_C12C_k141_220176 | 5074  | 3  | 0 | 2 | Low-quality | 1.45 |
| Sample_T11B_k141_52588  | 8337  | 12 | 0 | 5 | Low-quality | 1.45 |
| Sample_T8B_k141_83959   | 15782 | 10 | 0 | 7 | Low-quality | 1.45 |
| Sample_T10A_k141_90795  | 7797  | 17 | 1 | 0 | Low-quality | 1.44 |

|                                   |       |    |   |    |             |      |
|-----------------------------------|-------|----|---|----|-------------|------|
| Sample_T15A_k141_6984             | 6437  | 7  | 1 | 2  | Low-quality | 1.44 |
| Sample_C12C_k141_201883           | 5221  | 7  | 1 | 0  | Low-quality | 1.43 |
| Sample_C5A_k141_139944            | 5859  | 6  | 1 | 2  | Low-quality | 1.42 |
| Sample_T6A_k141_307791            | 9244  | 9  | 0 | 6  | Low-quality | 1.42 |
| Sample_T7A_k141_183892            | 5306  | 3  | 0 | 2  | Low-quality | 1.42 |
| Sample_T8C_k141_169673_fragment_3 | 15906 | 18 | 3 | 4  | Low-quality | 1.42 |
| Sample_T12A_k141_292890           | 5438  | 7  | 0 | 1  | Low-quality | 1.41 |
| Sample_T12C_k141_106402           | 5196  | 6  | 1 | 2  | Low-quality | 1.41 |
| Sample_T2A_k141_6748              | 6783  | 7  | 1 | 2  | Low-quality | 1.41 |
| Sample_T2B_k141_41365             | 15267 | 8  | 0 | 7  | Low-quality | 1.41 |
| Sample_T3A_k141_43414             | 5121  | 4  | 1 | 1  | Low-quality | 1.41 |
| Sample_T4B_k141_85689             | 10844 | 10 | 1 | 2  | Low-quality | 1.4  |
| Sample_T8A_k141_47646             | 9049  | 9  | 0 | 6  | Low-quality | 1.4  |
| Sample_C9A_k141_108509            | 5259  | 5  | 0 | 4  | Low-quality | 1.39 |
| Sample_T10A_k141_138493           | 7382  | 9  | 1 | 1  | Low-quality | 1.39 |
| Sample_T15C_k141_124621           | 88314 | 85 | 2 | 59 | Low-quality | 1.39 |
| Sample_C2A_k141_103049            | 6232  | 7  | 0 | 2  | Low-quality | 1.39 |
| Sample_T12B_k141_161296           | 5740  | 7  | 1 | 1  | Low-quality | 1.38 |
| Sample_T15C_k141_41558            | 5767  | 6  | 0 | 3  | Low-quality | 1.37 |
| Sample_T6A_k141_309357            | 8386  | 10 | 0 | 7  | Low-quality | 1.37 |
| Sample_C11A_k141_133993           | 12226 | 22 | 1 | 0  | Low-quality | 1.37 |
| Sample_T5C_k141_2114              | 8073  | 8  | 0 | 6  | Low-quality | 1.36 |
| Sample_C4C_k141_102949            | 10670 | 11 | 2 | 3  | Low-quality | 1.35 |
| Sample_T12A_k141_37875            | 10488 | 12 | 2 | 4  | Low-quality | 1.34 |
| Sample_T2C_k141_70301             | 13488 | 10 | 2 | 4  | Low-quality | 1.34 |
| Sample_T6C_k141_219506            | 7964  | 6  | 0 | 4  | Low-quality | 1.34 |
| Sample_C12A_k141_89618            | 7560  | 4  | 0 | 3  | Low-quality | 1.33 |
| Sample_T2B_k141_112812            | 6127  | 5  | 1 | 1  | Low-quality | 1.31 |
| Sample_C2B_k141_326608            | 5498  | 3  | 1 | 1  | Low-quality | 1.3  |
| Sample_T16A_k141_131651           | 7710  | 9  | 0 | 3  | Low-quality | 1.3  |
| Sample_T6A_k141_113823            | 12626 | 28 | 2 | 0  | Low-quality | 1.3  |
| Sample_T6A_k141_307229            | 5188  | 6  | 0 | 2  | Low-quality | 1.3  |
| Sample_T14B_k141_31480            | 15332 | 19 | 1 | 0  | Low-quality | 1.29 |
| Sample_C6B_k141_4493              | 10348 | 8  | 1 | 4  | Low-quality | 1.28 |
| Sample_C6B_k141_22188             | 7526  | 6  | 0 | 6  | Low-quality | 1.26 |
| Sample_T6A_k141_235154            | 11192 | 8  | 1 | 5  | Low-quality | 1.26 |
| Sample_T6A_k141_147572            | 14324 | 17 | 2 | 4  | Low-quality | 1.26 |
| Sample_T15B_k141_121854           | 5677  | 4  | 0 | 3  | Low-quality | 1.25 |
| Sample_C1B_k141_141007            | 5053  | 6  | 1 | 2  | Low-quality | 1.25 |

|                         |       |    |   |    |             |      |
|-------------------------|-------|----|---|----|-------------|------|
| Sample_C3A_k141_104684  | 5107  | 3  | 1 | 1  | Low-quality | 1.24 |
| Sample_C4A_k141_142083  | 5675  | 10 | 1 | 2  | Low-quality | 1.24 |
| Sample_T4B_k141_142256  | 8026  | 7  | 0 | 5  | Low-quality | 1.24 |
| Sample_C1C_k141_36549   | 12751 | 13 | 0 | 8  | Low-quality | 1.23 |
| Sample_C2A_k141_29737   | 6862  | 7  | 1 | 1  | Low-quality | 1.23 |
| Sample_C2B_k141_109043  | 5117  | 5  | 0 | 3  | Low-quality | 1.21 |
| Sample_T12C_k141_20149  | 7262  | 8  | 0 | 5  | Low-quality | 1.21 |
| Sample_C6B_k141_155631  | 7623  | 8  | 0 | 7  | Low-quality | 1.2  |
| Sample_T2C_k141_124212  | 5567  | 5  | 0 | 2  | Low-quality | 1.2  |
| Sample_T12A_k141_59345  | 5386  | 2  | 0 | 2  | Low-quality | 1.19 |
| Sample_T18B_k141_27335  | 5035  | 7  | 1 | 2  | Low-quality | 1.19 |
| Sample_T1B_k141_14355   | 14784 | 18 | 1 | 12 | Low-quality | 1.19 |
| Sample_T3B_k141_22186   | 7709  | 8  | 1 | 2  | Low-quality | 1.19 |
| Sample_C8C_k141_40645   | 6432  | 7  | 1 | 1  | Low-quality | 1.18 |
| Sample_T8A_k141_79124   | 7902  | 7  | 0 | 1  | Low-quality | 1.18 |
| Sample_C8C_k141_132560  | 5204  | 8  | 1 | 3  | Low-quality | 1.17 |
| Sample_C2A_k141_144780  | 6837  | 5  | 0 | 5  | Low-quality | 1.16 |
| Sample_T11B_k141_34257  | 7645  | 7  | 0 | 3  | Low-quality | 1.15 |
| Sample_C6B_k141_98936   | 5125  | 4  | 1 | 1  | Low-quality | 1.14 |
| Sample_T16C_k141_116833 | 12937 | 5  | 1 | 1  | Low-quality | 1.14 |
| Sample_C7B_k141_5114    | 7000  | 7  | 1 | 4  | Low-quality | 1.12 |
| Sample_T18C_k141_34117  | 6343  | 5  | 0 | 5  | Low-quality | 1.12 |
| Sample_C4A_k141_76323   | 5140  | 8  | 1 | 1  | Low-quality | 1.11 |
| Sample_C2B_k141_206567  | 7696  | 7  | 0 | 5  | Low-quality | 1.1  |
| Sample_C7C_k141_50198   | 7074  | 10 | 1 | 6  | Low-quality | 1.1  |
| Sample_C4C_k141_190799  | 7248  | 6  | 1 | 1  | Low-quality | 1.1  |
| Sample_C2C_k141_312894  | 13452 | 10 | 1 | 4  | Low-quality | 1.07 |
| Sample_C3A_k141_102192  | 11771 | 8  | 0 | 5  | Low-quality | 1.07 |
| Sample_C13B_k141_33730  | 6260  | 6  | 0 | 5  | Low-quality | 1.06 |
| Sample_C8C_k141_153283  | 6139  | 4  | 1 | 1  | Low-quality | 1.04 |
| Sample_C4A_k141_45903   | 8115  | 9  | 1 | 7  | Low-quality | 1.02 |
| Sample_T8B_k141_86554   | 5660  | 4  | 0 | 4  | Low-quality | 1.01 |
| Sample_T7A_k141_200064  | 5695  | 8  | 1 | 2  | Low-quality | 1.01 |
| Sample_C5A_k141_142459  | 5874  | 5  | 1 | 2  | Low-quality | 1    |
| Sample_C6B_k141_123115  | 5931  | 6  | 0 | 5  | Low-quality | 0.99 |
| Sample_T2A_k141_181076  | 5567  | 4  | 0 | 4  | Low-quality | 0.99 |
| Sample_C10A_k141_25625  | 5650  | 6  | 0 | 2  | Low-quality | 0.98 |
| Sample_C2A_k141_1095    | 5808  | 6  | 0 | 3  | Low-quality | 0.98 |
| Sample_T8B_k141_212946  | 5515  | 7  | 2 | 0  | Low-quality | 0.97 |

|                                   |       |    |   |   |             |      |
|-----------------------------------|-------|----|---|---|-------------|------|
| Sample_C3B_k141_184582            | 7575  | 7  | 1 | 4 | Low-quality | 0.96 |
| Sample_T4B_k141_124014            | 5686  | 5  | 0 | 5 | Low-quality | 0.96 |
| Sample_C1C_k141_107599            | 5101  | 5  | 1 | 1 | Low-quality | 0.96 |
| Sample_T14B_k141_62853            | 5216  | 6  | 0 | 0 | Low-quality | 0.95 |
| Sample_T8A_k141_212637            | 6117  | 5  | 0 | 5 | Low-quality | 0.95 |
| Sample_C6C_k141_66600             | 9482  | 9  | 2 | 6 | Low-quality | 0.94 |
| Sample_C11A_k141_112070           | 5105  | 5  | 1 | 1 | Low-quality | 0.93 |
| Sample_C13A_k141_52919            | 11124 | 11 | 1 | 3 | Low-quality | 0.93 |
| Sample_T12B_k141_158154           | 5053  | 7  | 1 | 1 | Low-quality | 0.92 |
| Sample_T7C_k141_73413             | 5085  | 5  | 0 | 4 | Low-quality | 0.91 |
| Sample_T1A_k141_32918             | 7603  | 6  | 0 | 5 | Low-quality | 0.9  |
| Sample_T13B_k141_147572           | 5338  | 5  | 2 | 2 | Low-quality | 0.89 |
| Sample_C6C_k141_59052             | 5120  | 6  | 0 | 5 | Low-quality | 0.87 |
| Sample_C13B_k141_29257            | 6145  | 6  | 1 | 2 | Low-quality | 0.86 |
| Sample_T16C_k141_87515            | 5043  | 5  | 0 | 4 | Low-quality | 0.86 |
| Sample_C4C_k141_131743_fragment_1 | 8431  | 10 | 1 | 3 | Low-quality | 0.86 |
| Sample_C10C_k141_144982           | 5131  | 5  | 0 | 4 | Low-quality | 0.85 |
| Sample_T12C_k141_120103           | 6325  | 6  | 0 | 6 | Low-quality | 0.85 |
| Sample_T3C_k141_59835             | 6263  | 4  | 1 | 2 | Low-quality | 0.85 |
| Sample_C14C_k141_168668           | 5898  | 6  | 1 | 3 | Low-quality | 0.85 |
| Sample_T11B_k141_155728           | 5678  | 6  | 2 | 2 | Low-quality | 0.84 |
| Sample_T4A_k141_93873             | 7545  | 7  | 0 | 5 | Low-quality | 0.84 |
| Sample_T10B_k141_148657           | 5610  | 5  | 0 | 4 | Low-quality | 0.83 |
| Sample_T4B_k141_171706            | 5373  | 4  | 1 | 3 | Low-quality | 0.82 |
| Sample_T6C_k141_173026            | 13359 | 7  | 1 | 6 | Low-quality | 0.81 |
| Sample_C8B_k141_101615            | 5256  | 5  | 1 | 1 | Low-quality | 0.81 |
| Sample_T12B_k141_39984            | 7518  | 8  | 1 | 2 | Low-quality | 0.8  |
| Sample_C3C_k141_67924             | 5041  | 7  | 1 | 2 | Low-quality | 0.79 |
| Sample_T10A_k141_41888            | 6825  | 8  | 1 | 3 | Low-quality | 0.79 |
| Sample_T11B_k141_66026            | 5497  | 4  | 0 | 4 | Low-quality | 0.79 |
| Sample_C8B_k141_36151             | 5001  | 6  | 1 | 3 | Low-quality | 0.79 |
| Sample_C12C_k141_40630            | 5141  | 5  | 0 | 2 | Low-quality | 0.77 |
| Sample_C14C_k141_175312           | 5285  | 5  | 1 | 2 | Low-quality | 0.76 |
| Sample_C1C_k141_26847             | 6176  | 7  | 1 | 4 | Low-quality | 0.75 |
| Sample_C9B_k141_18544             | 5322  | 4  | 1 | 1 | Low-quality | 0.75 |
| Sample_T8B_k141_178700            | 5665  | 8  | 1 | 2 | Low-quality | 0.75 |
| Sample_C10A_k141_150048           | 6151  | 7  | 1 | 2 | Low-quality | 0.74 |
| Sample_C6C_k141_171246            | 7968  | 4  | 0 | 3 | Low-quality | 0.73 |
| Sample_C3A_k141_92293             | 6092  | 2  | 1 | 1 | Low-quality | 0.71 |

|                                   |       |    |   |   |             |      |
|-----------------------------------|-------|----|---|---|-------------|------|
| Sample_C6C_k141_47593             | 7456  | 9  | 1 | 2 | Low-quality | 0.71 |
| Sample_T4B_k141_66549             | 7678  | 4  | 0 | 2 | Low-quality | 0.71 |
| Sample_C7C_k141_40251             | 7648  | 3  | 0 | 3 | Low-quality | 0.7  |
| Sample_T2B_k141_302888            | 7539  | 3  | 0 | 2 | Low-quality | 0.69 |
| Sample_C10C_k141_60746            | 6796  | 7  | 0 | 6 | Low-quality | 0.67 |
| Sample_C3B_k141_119708            | 5216  | 5  | 1 | 2 | Low-quality | 0.67 |
| Sample_C14C_k141_21768            | 7833  | 6  | 1 | 1 | Low-quality | 0.66 |
| Sample_T11B_k141_43310_fragment_2 | 7388  | 10 | 1 | 7 | Low-quality | 0.66 |
| Sample_C5A_k141_165478            | 6763  | 5  | 1 | 2 | Low-quality | 0.65 |
| Sample_C4A_k141_184357            | 6743  | 9  | 2 | 3 | Low-quality | 0.65 |
| Sample_C13A_k141_48430            | 8779  | 8  | 0 | 7 | Low-quality | 0.63 |
| Sample_T17B_k141_26500            | 5633  | 7  | 2 | 1 | Low-quality | 0.63 |
| Sample_T15C_k141_132838           | 6635  | 7  | 1 | 1 | Low-quality | 0.63 |
| Sample_C1B_k141_94046             | 9495  | 7  | 1 | 2 | Low-quality | 0.62 |
| Sample_C7B_k141_129831            | 6350  | 9  | 2 | 4 | Low-quality | 0.62 |
| Sample_T8A_k141_219164            | 8169  | 9  | 1 | 1 | Low-quality | 0.62 |
| Sample_T8B_k141_184088            | 6506  | 3  | 0 | 2 | Low-quality | 0.6  |
| Sample_C4B_k141_1460              | 12335 | 7  | 1 | 2 | Low-quality | 0.59 |
| Sample_T2B_k141_62523             | 6290  | 4  | 0 | 4 | Low-quality | 0.58 |
| Sample_C4A_k141_159982            | 7039  | 8  | 1 | 2 | Low-quality | 0.57 |
| Sample_T2C_k141_158636            | 5739  | 5  | 0 | 4 | Low-quality | 0.56 |
| Sample_T4C_k141_29015             | 12537 | 10 | 1 | 7 | Low-quality | 0.56 |
| Sample_C10C_k141_80143            | 5879  | 4  | 0 | 3 | Low-quality | 0.55 |
| Sample_C9C_k141_52641             | 5566  | 7  | 1 | 2 | Low-quality | 0.55 |
| Sample_T4B_k141_45727             | 5535  | 3  | 0 | 3 | Low-quality | 0.55 |
| Sample_C8C_k141_116362            | 5483  | 5  | 0 | 4 | Low-quality | 0.54 |
| Sample_T2C_k141_193719            | 5720  | 4  | 0 | 3 | Low-quality | 0.53 |
| Sample_C4C_k141_16866             | 5628  | 3  | 0 | 3 | Low-quality | 0.52 |
| Sample_C8B_k141_48937             | 5728  | 4  | 0 | 3 | Low-quality | 0.52 |
| Sample_C12A_k141_101593           | 5484  | 3  | 0 | 3 | Low-quality | 0.51 |
| Sample_T4A_k141_6061              | 5512  | 2  | 0 | 1 | Low-quality | 0.51 |
| Sample_C10C_k141_173707           | 5492  | 5  | 0 | 2 | Low-quality | 0.5  |
| Sample_C5B_k141_31374             | 5322  | 9  | 1 | 2 | Low-quality | 0.49 |
| Sample_T7C_k141_67815             | 5362  | 2  | 0 | 2 | Low-quality | 0.49 |
| Sample_T5C_k141_19844             | 5187  | 2  | 0 | 2 | Low-quality | 0.48 |
| Sample_T16B_k141_11412            | 9008  | 9  | 1 | 6 | Low-quality | 0.46 |
| Sample_T13A_k141_56835_fragment_1 | 11848 | 8  | 1 | 2 | Low-quality | 0.43 |
| Sample_C2C_k141_285921            | 5936  | 7  | 1 | 2 | Low-quality | 0.42 |
| Sample_C10C_k141_224224           | 10122 | 10 | 1 | 6 | Low-quality | 0.41 |

|                         |       |    |   |   |             |      |
|-------------------------|-------|----|---|---|-------------|------|
| Sample_T12A_k141_7663   | 5355  | 6  | 1 | 5 | Low-quality | 0.4  |
| Sample_C8B_k141_126344  | 11217 | 7  | 1 | 4 | Low-quality | 0.38 |
| Sample_C4A_k141_249461  | 5810  | 4  | 1 | 2 | Low-quality | 0.35 |
| Sample_C1B_k141_79771   | 7139  | 10 | 1 | 0 | Low-quality | 0.33 |
| Sample_C11B_k141_119973 | 5986  | 3  | 1 | 1 | Low-quality | 0.32 |
| Sample_T10C_k141_25443  | 6491  | 8  | 1 | 3 | Low-quality | 0.31 |
| Sample_T8B_k141_116604  | 5796  | 11 | 1 | 1 | Low-quality | 0.29 |
| Sample_C10B_k141_56519  | 8521  | 5  | 1 | 2 | Low-quality | 0.26 |
| Sample_T14B_k141_215540 | 9593  | 6  | 1 | 3 | Low-quality | 0.26 |
| Sample_T16B_k141_110035 | 5780  | 5  | 1 | 3 | Low-quality | 0.24 |
| Sample_T16C_k141_60848  | 5673  | 9  | 1 | 4 | Low-quality | 0.24 |
| Sample_T10A_k141_50534  | 6099  | 5  | 1 | 4 | Low-quality | 0.23 |
| Sample_T7B_k141_11894   | 6055  | 7  | 1 | 2 | Low-quality | 0.19 |
| Sample_C10A_k141_196034 | 10607 | 10 | 1 | 5 | Low-quality | 0.18 |
| Sample_T4C_k141_15597   | 6663  | 5  | 1 | 2 | Low-quality | 0.12 |
| Sample_C1A_k141_44306   | 5553  | 2  | 1 | 1 | Low-quality | 0.11 |
| Sample_C2B_k141_210313  | 6218  | 6  | 1 | 2 | Low-quality | 0.11 |
| Sample_T7A_k141_11156   | 6920  | 5  | 1 | 2 | Low-quality | 0.09 |
